# Supplementary material for: Lipidomic profiling reveals distinct differences in plasma lipid composition in overweight or obese adolescent students
Source: Research Square preprint supplement (doi:10.21203/rs.3.rs-33013/v3), 2021-03-09
Supplement: Supplementary file 1 [file 6bf4e42c3bead10e2b2193b4.docx]

**Figure legends**

Additional file 1: Basic information, clinical and phenotypic data of participants .

Additional file 2: 51135 positive ion modes from non-targeted metabolomics analysis.

Additional file 3: 8988 negative ion modes from non-targeted metabolomics analysis.

Additional file 4: Up-regulated positive features among the 3 groups.

Additional file 5: Up-regulated negative features among the 3 groups.

Additional file 6: Down-regulated positive features among the 3 groups.

Additional file 7: Down-regulated negative features among the 3 groups.

Additional file 8: Different positive features between the control and obese group.

Additional file 9: Different positive features between the control and overweight group.

Additional file 10: Different positive features between the obese and overweight group.

Additional file 11: Different negative features between the control and obese group.

Additional file 12: Different negative features between the control and overweight group.

Additional file 13: Different negative features between the obese and overweight group.
