# Supplementary material for: Lipidomic profiling reveals distinct differences in plasma lipid composition in overweight or obese adolescent students
Source: Research Square preprint supplement (doi:10.21203/rs.3.rs-33013/v3), 2021-03-09
Supplement: Supplementary file 2 [file 6f68d0be1b6b305d04e8c995.xls]

## Sheet: Additional file 4
mz	control_6	control_9	control_12	control_13	control_15	control_19	control_22	control_25	control_29	control_32	control_35	control_39	control_42	control_45	control_48	control_52	control_55	control_58	control_62	control_68	control_72	control_75	control_78	control_81	control_85	control_88	control_91	control_95	control_98	control_101	overweight_7	overweight_10	overweight_17	overweight_20	overweight_23	obesity_26	overweight_30	overweight_33	overweight_36	overweight_40	overweight_43	overweight_46	overweight_50	overweight_53	overweight_56	obesity_59	overweight_63	overweight_65	obesity_66
0.38_1685.0628m/z	62125.7	59104.7	53261.2	479.534	77483.4	108316	62966	64048.3	41133.4	26930.4	27858.3	9775.12	27950.6	50055.9	55823.3	2720.57	13.6272	50302.4	63312.4	143908	18744.7	33013.6	18683.9	16023.9	20485.9	4850.49	53002.8	11136.7	63375.3	57979.9	15865.1	60797.6	1028.78	92887.5	52091.1	48685	37481.7	35195	34645.3	27749.5	4348.28	33910.5	47316.2	47470.7	55129.1	55727	65026.1	92702.2	77155.3
0.39_1279.2155m/z	487696	358493	870234	585704	422910	409251	813487	848791	436570	167300	184427	957861	653998	706321	629027	607046	616308	315265	687037	300904	558506	496775	599897	410240	546706	496120	266442	399961	337353	326070	327121	292672	767790	840664	377498	961371	828353	952614	245598	756522	703019	820280	205436	425286	503600	672365	282389	398142	506264
0.39_1451.1475m/z	237147	414012	122138	302678	421398	190142	235858	460484	187180	234956	175138	221848	269176	114351	438559	243079	266420	62887.6	220250	203260	264089	120687	57535.2	376798	277052	74741	292790	326877	203705	87012.2	359697	436344	322648	239263	276464	277935	193977	341167	93021.5	91540.1	385940	229774	102679	275655	391410	295935	140544	539596	348721
0.39_1563.1162n	140639	249825	373695	162547	198454	723442	1.76504e+06	1.43053e+06	2.59646e+06	695862	430665	404068	270131	282736	326001	406499	619234	176886	293282	611777	467618	84183.7	854223	616282	551002	497840	598743	577136	527646	457892	193515	494999	709194	792136	1.67413e+06	1.54902e+06	2.09141e+06	713033	472887	133104	164128	99980.7	237786	378624	701443	685595	260669	515364	724619
0.39_1612.3911m/z	160421	51720.3	171116	328653	439.233	177019	59584.6	83547.2	51291.7	112856	105247	143356	102109	107500	262686	14045.8	232756	114072	229777	195166	118740	32249.4	34334.5	112123	33690	195381	200761	62472.7	1124.77	46149.8	124297	60171.8	292882	172977	112011	210171	247084	35421.3	176636	115409	60092.3	105400	109950	157983	141862	35423.6	167850	206331	14816.1
0.40_1241.4002m/z	717608	427964	414652	673277	933099	308884	593281	310326	718350	912837	483238	692974	806425	566846	564631	935190	434418	489675	378469	278079	291758	422939	384867	307472	384000	369071	229266	678069	332566	132797	569416	825613	607889	902993	680386	539767	596094	543729	566339	506655	554914	372094	862962	596176	374677	385075	508780	431993	512901
0.40_1415.5210n	1.6399e+06	870014	1.36797e+06	707469	1.32837e+06	1.49344e+06	1.1044e+06	1.47052e+06	1.05387e+06	739181	569755	1.14393e+06	997606	949083	800893	952994	587140	867569	254057	1.07071e+06	689979	1.50124e+06	862494	817425	1.3193e+06	1.12406e+06	1.51547e+06	1.18231e+06	1.04199e+06	964026	1.66414e+06	1.38573e+06	1.16249e+06	1.28383e+06	1.32569e+06	1.45124e+06	1.25807e+06	866646	1.34253e+06	837335	714715	452739	559473	1.22663e+06	1.04612e+06	956021	1.08878e+06	918611	395739
0.40_1425.4020m/z	229060	259202	157727	549135	232172	73646.7	79104.5	127211	199509	86253.6	175703	130432	148910	420336	615688	528409	246222	276718	263188	365877	573158	736995	125893	386406	554944	388676	194654	472983	566143	30088.3	892792	581527	257956	145042	67401.6	97984.4	137137	48581.2	173417	199356	293909	202988	506618	361724	261261	74131.5	511067	457353	5570.12
0.41_1086.0190n	41711.3	55754	105460	33759.2	8438.88	46829.9	77380.7	7614.21	11905.6	50396.1	82512.5	208863	475455	25279.4	100802	27443	52808.7	498.606	200.024	5927.48	21211.4	56441.2	10466.1	154392	202388	58960.2	114351	78747.9	500511	137690	71094.9	7595.77	99727.4	57171.4	12501.4	71610.7	54449.8	23861.5	143340	272901	21840.6	34391.8	9961.32	220393	128947	72485.6	249.305	126632	2894.09
0.41_1098.5757m/z	50518.4	350708	34511.5	180466	63116.6	49131.5	55519.8	83503.9	17732.7	33762.3	44427.1	168085	160005	198414	317491	156947	27273.4	64756	114509	868543	2.46598e+06	11877.6	337815	1.29303e+06	86990.2	171125	75179.4	64260.2	38676.4	107044	188118	91268.2	110700	188.941	24752.5	23873.6	70685.1	57985.8	77096.8	94051.5	155498	209781	43918.6	216334	66067.8	131940	320397	231893	511889
0.41_1141.5128m/z	43022.6	37239.3	51454.4	95764.4	38294.6	38031.7	42714.2	33468.5	9770.74	72661.1	177295	460940	79085.7	931729	930.397	10030.7	127989	37490.1	62203.4	94839	74363.3	86477.8	42874.4	226957	48208.2	103388	23373	4.73285	25783.3	27252.1	36447.9	31197.4	12579.6	32118.1	16660.3	16124.2	24226.1	147121	317432	420413	125963	889440	484213	259919	196683	54309.7	38063.3	20235.7	40358.6
0.41_1189.8235m/z	131725	316420	73637.2	463539	332937	248268	178385	185928	376295	726012	269455	196297	384241	44381	136133	130001	96747.8	501519	75748.9	171408	92685.8	232.527	195630	231476	130657	253859	94328.2	290392	36530.9	107860	232241	398922	145216	570337	71027.1	319833	418203	300593	159710	262372	188947	220914	128976	106886	189436	83881.5	345664	376771	186438
0.41_1332.7581m/z	230488	51567.2	432801	55980.4	404173	227313	435780	146501	228490	336682	313030	613399	251827	69472.6	244705	426401	151425	212138	154955	340322	235161	102898	206196	588770	131727	706469	162199	196643	93661	139451	280239	122579	424657	295867	595850	397857	436860	42326.8	661219	566554	529491	177839	386233	656424	186664	417663	476459	423898	131883
0.41_1477.1525m/z	60605	51588.5	36803.3	39093.6	48529.5	75256.3	46362.1	129369	105587	77580	24726	3269.69	78441.6	143958	243861	146798	123263	64688.6	95731.3	66402.2	35740.8	28427.7	69754.3	123889	115256	84120.3	201504	192062	443250	212710	39739.9	39308	183316	220448	41584.1	178208	156817	34096.1	51156.4	9396.2	78227.1	223.988	133677	35492.7	53833.9	79851.4	44081.9	232204	33833.5
0.42_1097.9510n	649701	730738	481269	369571	451597	413919	475838	373076	333248	387431	240850	318669	136197	107941	392072	368935	448556	403583	316275	575640	40561.7	336226	140181	142515	570430	1.51336e+06	753644	2.13501e+06	2.13917e+06	417626	470256	541453	344971	355051	324890	563570	319286	263467	275360	217606	185386	243585	493463	406466	369582	269974	693008	479171	518361
0.42_1396.8133n	381855	588073	756230	194569	634141	791206	581083	437298	746229	431175	455599	1.2702e+06	919784	465812	1.18481e+06	656196	266073	541128	645159	656147	687920	595327	550351	743121	595089	862183	580173	791361	400499	426029	667811	825840	549514	553960	718438	770285	743960	194851	815561	1.06131e+06	749257	218457	482614	968347	505745	976595	1.0489e+06	612677	388019
0.43_1049.9922n	184134	326017	315269	431056	326551	345271	419025	215078	360944	94726.7	230678	286979	412152	230956	153781	389220	428667	164634	324474	288615	200003	555796	336418	259093	165167	517509	256773	91782.7	265533	255855	354164	228529	496957	401784	454689	156207	115687	270139	213235	280302	305542	351937	279495	431407	465433	221718	322634	549581	67322.2
0.43_948.1023m/z	42296.9	130390	55268	46046.4	98860.1	50411.8	36930.5	9.50384	97468.6	124936	50751.1	61316.4	68.0339	56348.3	39790.8	75624	53015.7	46750.8	49043.3	35251.7	21215.2	89473.3	3411.89	37434	44830.2	48352.4	44267.7	21495.9	40528.7	42804.8	109913	9790.01	77817.3	61660	29406.3	76667.9	93337.5	57013.5	678.507	61187.8	140436	45537.4	73092.8	84165.1	53282.3	54691.9	27795.6	36552.6	56426
0.44_1121.2952m/z	500791	548972	632101	266461	744231	309634	417532	623296	868721	882113	819603	679066	325822	189655	1.45116e+06	765540	411451	408749	615.057	713801	701305	1.27928e+06	248729	490944	359367	493128	798502	401200	668705	340832	611254	527362	268825	485214	396263	577714	892322	800087	486479	599631	554395	668999	523990	441181	563021	206256	154414	703085	796692
0.46_1413.7094m/z	119113	234489	199182	10423.9	156765	69079.3	30406.1	22755.3	51728.9	32030.1	62487.5	154193	327191	205470	147989	6508.37	33943.8	7282.58	155778	47611.7	5.92721e+06	35896.3	432263	91602.8	24649.1	25332.3	73514.5	239642	233617	168.679	50576.7	257798	87130.8	45702.2	27215.7	28273	81618.2	55721.2	55596.4	2578.4	465338	182487	125725	52536.4	32484	35091.2	722.743	20263.9	934642
0.48_866.9415m/z	39818.5	40759	20141.4	29991.4	45708.7	70648.4	39292.4	65974.1	57489.9	71450.9	2547.1	40256.4	38918.3	16758.4	20052.3	8686.56	33007	26323.7	4123.63	120575	58980.4	72707.4	40942.9	39979.3	29789.8	31938.7	38499.2	115299	6366.97	93572.4	30008.6	35336.6	38478.2	106256	30329.9	88996.6	57532.7	27370.6	73560.3	20530.5	16903.8	71270.7	50721.6	32543	42166.6	1773.8	59313.5	45743.4	48834.7
0.49_1045.6440n	276178	168595	323121	543373	672197	1.51548e+06	1.12417e+06	2.04629e+06	643450	290121	330740	240115	400017	730567	613486	184787	263210	169279	459875	1.71502e+06	4.47551e+06	4.40466e+06	1.77666e+06	196783	34988.4	625943	161333	2.61335e+06	1.18192e+07	2.2311e+07	134656	363524	822257	2.13866e+06	979557	603296	273891	396618	298815	313937	411520	499237	391108	160706	212563	360424	264049	681407	1.66795e+06
0.49_1056.6532n	617637	556945	1.0095e+06	1.03592e+06	601755	711278	843943	1.32157e+06	827734	752078	765457	298708	304746	624424	827268	776868	390141	1.35784e+06	1.28842e+06	1.70881e+06	1.05736e+06	424244	805760	631785	247001	517403	1.05379e+06	789894	393682	759131	372568	749641	954796	592296	1.05049e+06	751270	745750	402403	534283	403497	412104	409551	452274	403786	782383	1.1201e+06	1.66122e+06	1.36783e+06	2.47529e+06
0.49_695.2657n	102005	59328.3	35493.7	28432.4	60169.3	136968	68805.3	153587	40079.6	23091.8	62733.3	86996.7	69226	162890	3538.99	59496.4	140944	66490.3	79728.9	112137	85533.5	63410.9	93308.3	74172.7	48262.3	69667.4	37993.8	107415	90746.8	142174	39582.7	39316.4	138527	42466.8	32769	67500.1	79168.2	26549.1	40719.1	177153	68152.1	41797.8	88615.2	37105	82252.2	192034	179417	52536	91019.5
0.49_841.1281m/z	217463	114908	348700	154515	14283.3	283418	65969.5	238940	225645	341660	167335	155603	342681	336121	257432	231349	257160	25999.3	133655	126748	197058	251843	86066.9	98497.1	29615	83815.3	123592	260460	71092	224831	166310	212908	313567	427697	207165	59554.7	221724	99403.4	173110	170317	251477	71457.8	151178	193051	208489	294343	241739	243229	279420
0.49_857.7304n	308085	212377	303682	332778	148319	191319	572023	635148	438468	452022	351881	411766	320413	310056	238211	328250	246626	235204	763129	364891	706154	385105	453491	5964.38	132259	672334	457358	754268	1.28594e+06	967487	119751	175957	270555	418774	261769	223585	520834	214514	494527	132639	134235	120711	263579	105808	626029	852434	483116	724575	834238
0.49_979.1014n	16532.5	3955.54	7562.13	8286.84	17923	216110	1.93169e+06	9.49106e+06	3.1254e+06	1.58509e+06	240691	113582	14292	88545.5	171739	108169	205777	134040	85699.9	47551.3	42686.9	62081.5	315727	279779	121722	249037	158378	75401.8	32996.8	103009	3214.65	1060.49	240889	2.38295e+06	558121	1.5494e+07	2.73047e+06	2.4632e+06	489802	338306	202695	100566	137332	184174	46414.6	42104.3	106166	56646.7	96527.7
0.51_1080.1760m/z	76103.5	56606.4	81311.8	113730	15499.6	30321.2	289581	342032	79501.3	6793.38	268.729	34446.3	328538	140679	973316	732471	53948.6	4797.57	43534.1	42601.2	68653.7	60049.1	31995.6	33485.1	112931	277146	205963	399199	175602	151587	23731.6	38807.1	20026.7	241696	59231.9	177370	34064.9	5865.79	56780	155881	170807	895070	6412.48	685968	416647	49954.4	40503.9	54907.5	95991.5
0.51_1271.8007m/z	83063.9	112334	132731	32075.7	350767	110766	93077	124430	313315	371867	27048.6	210667	176401	290688	384827	347089	259938	293675	184737	86725.6	77197.1	75059.8	56273.7	216061	54849	279150	33172.6	20597.4	90743.5	30584.5	174094	41360.3	88935.1	111334	152187	238337	298449	303139	179954	410301	395705	682940	590963	13720.5	96487.8	122746	93974.4	219608	146784
0.51_850.0372m/z	45814.7	10706.7	18220.7	45141.6	28513.1	62010.6	29613.5	80419.7	51814	110307	153105	167566	61343	61748.9	28959.7	30312	16085.9	159907	626.097	66734.9	27224	1672.43	59048.5	47208	6292.78	9843.99	50886.8	51381.6	964.827	283877	17852.4	15385.4	60697.1	128523	100053	5296.09	141368	163921	180474	238299	38402.3	84761.5	43329.6	47163.2	4073.27	18178.8	63.508	932.611	16632.5
0.53_835.8633m/z	243556	215510	12470.2	154198	38507.8	110146	27206.1	162665	262155	351049	119034	420661	470734	306083	335971	155090	152705	197019	257047	372899	207991	473099	94785	190428	416564	166960	1.00203e+06	189627	713442	88726.4	190748	235319	172710	106859	191148	94762.8	190589	91308.1	860917	701066	537886	242776	192917	165668	71776.3	200850	198322	206026	73658.4
0.54_1179.4469n	22739.1	10652.5	34324.4	44406.6	117479	219350	223153	332115	1.06762e+06	163593	310037	151241	56436.8	39113.4	55625.4	32452.9	23343.5	2847.05	25584.9	105897	186208	194906	33733	126093	21678.4	32288.1	9107.56	31042.5	472824	448848	32209.1	20793.7	214377	306622	518909	240009	279130	404084	296656	197913	69713.1	113032	65489.4	18379.6	3613.52	30729.4	13909.3	68581.9	121571
0.54_1180.7338m/z	137065	17019.7	163606	51376.2	107065	161842	42129	144449	302137	176880	64521.3	811618	319425	536908	799560	238087	191740	62044.4	162533	321994	795526	346164	30219.1	657572	1.00289e+06	186997	29292.9	29199.3	18235.1	42072.5	146101	194158	63210.6	146926	63904.7	161700	90492.3	396415	351142	311799	1.59887e+06	2.0377e+06	446543	164055	436752	30930.8	22786	225495	245289
0.54_1191.3632m/z	342841	180787	357899	453008	435789	153259	74109.7	130783	35074.4	32274.3	225876	175929	1.10558e+06	7.43563e+06	3.49472e+06	1.06503e+07	1.12061e+06	197272	70720.7	104718	69641.9	152516	124464	4137.07	163890	86959.5	120557	110735	35862.4	13880	141377	433733	499047	163552	66691.9	65133	40014.3	53569.3	367870	985488	805856	1.11994e+07	1.44085e+07	1.81574e+06	341796	96356.7	48775	145824	162570
0.54_641.9122m/z	223131	244826	204766	184530	231772	260283	180552	212471	172524	205062	238273	193860	240827	219228	187882	144331	282373	187540	204715	183131	156794	181516	225063	155835	167561	243759	283921	225676	161618	187467	241024	184028	216739	247757	207390	181838	228764	267734	239366	195223	192398	207034	187340	175865	300231	245404	249563	205597	275148
0.55_1148.8481m/z	21804.6	689.638	14594.1	17291.3	30991.7	27528.5	31139.4	56012.4	81476.5	1723.78	104633	6046.57	13411.5	11057.3	6912.52	1739.29	2759.24	7783.96	10024.7	19776.2	78650.4	3036.61	93993.3	56638.1	190170	11854.7	26589.2	30137.7	45986.5	33359.9	24711.2	56639.8	18210.6	37224.3	13366.7	103116	65894	53291.1	92296.8	29397.5	9740.8	1274.84	21996.2	301.93	5717.95	7500.89	21010.4	8115.42	21448.6
0.55_1293.8260m/z	48214.7	76734.4	24163.9	53418.8	59785.4	106161	98200	174003	151741	325754	208471	94982.6	30205.6	111075	116417	90916.4	153377	162937	148774	222167	422099	171328	71303.9	112798	222525	204157	124347	262706	125055	73348.6	70681.4	21688.9	25913	209925	42577.2	427144	281639	262572	202566	54873.4	45172.9	51937.4	75547	62092.8	318729	183473	273345	226488	118499
0.55_1333.8712m/z	1151.83	107352	258838	264664	153841	223252	124208	263877	38420.2	36895.8	45288	6754.3	88547.8	253613	456563	740466	2.50397e+06	656434	971259	492389	90573.2	32658.9	16338.2	19935.3	2185.09	58151.5	65417.5	52228.4	80045.6	75127.1	18208.1	55680.9	347047	161739	137171	83958.4	140198	46476.8	49846.4	32608.7	112195	155986	405293	899087	1.4595e+06	1.63656e+06	1.3625e+06	613662	786697
0.55_218.1383m/z	31062.2	51778.7	51605.5	24909.2	34361.3	37863.6	18213.8	24419.8	43168.5	32284.2	60702.1	35731.4	46583.1	31081.3	44374.2	23051.3	43814.1	47185.2	22989	21124.2	18872.3	54440.9	45187	39547	31223.7	39449.7	26072.7	42068	33144.2	18488.1	42234.2	20149	62132.8	25081.9	66251.2	32679.2	54613.8	84701.2	31970	71087.3	38893.6	44915.2	46494	26610.3	24553.9	30775.5	59039.5	45722.6	26086.2
0.55_229.1541m/z	167878	192470	136885	123359	114949	122865	107589	96866.8	142592	92005.4	134314	103263	149060	116656	131668	104189	127206	139607	128019	88107.9	118032	168650	124158	130021	100669	101551	80375.1	87973.4	130593	109458	202313	136804	140685	104229	141065	133444	113060	107999	108118	139926	183203	105821	177058	122540	270942	159228	142375	132197	139751
0.55_241.1541m/z	15650.1	15012.3	9724.48	10497.8	12027.7	12320.2	10043.7	10830.3	10605.3	5365.32	14151.1	11161.4	15660	13584.3	11033	7207.35	5607	8888.7	5640.52	9372.73	9333.46	12893.3	6817.57	7400.91	9945.97	8579.29	5434.04	4737.57	7966.01	6081.89	15735.6	8926.03	13050.3	9917.89	11793.5	13329.4	8227.57	9760.75	7587.67	16882.2	7853.66	6463.21	10244.5	6400.77	13573.5	9437.31	15887.2	14578.7	9248.16
0.55_247.1427m/z	11881.9	10096.4	7833.56	6154.08	5699.01	2124.33	7870.49	3335.01	8462.2	211.161	8938.32	9943.32	9659.07	1805.74	11479	3303.13	13618	8492.01	2664	2423.11	4927.16	3188.06	21646.8	11479.2	2004.21	6696.22	4451	7576.81	4855.84	12540.7	6565.01	8625.3	35994	5937.29	11709.6	9464.11	4992.16	3918.2	18828.8	13504.6	12726.4	5154.42	18644.1	12130.4	6151.47	13733.9	4471.67	2214.79	2360.86
0.55_302.1961m/z	969.112	605.167	309.05	3.46259	664.316	399.148	550.894	617.997	214.593	460.095	182.185	275.469	251.84	206.931	807.14	11.772	358.623	445.618	268.374	160.267	499.188	562.227	587.738	29.3339	493.484	431.134	1042.86	487.477	520.664	255.263	953.306	206.5	739.001	155.447	287.026	581.648	498.921	320.83	665.709	694.142	16.9574	316.061	1332.05	337.296	381.122	273.796	300.596	307.27	263.134
0.55_467.3018m/z	27150.3	26997.3	20518.5	22485.1	26784.8	37872.5	25864.2	34907.3	36648.6	36500	25758.8	31650.4	26572.6	38616.2	23496.6	17871.1	29826.1	22927.2	41690.9	16539.7	14298.3	21278.5	25122.5	20135.4	27203.5	20570.8	26287.6	21575.4	31081.1	14505.8	35777.6	30677.1	28965.8	33623.1	24573.4	33668.2	38975.3	26276.7	20448.4	31454.8	26647.2	16612.9	19011.9	37015.6	46751.4	24191.5	26687	23654.2	29689.3
0.55_578.3429m/z	47637.1	40534.1	37441.9	42001.2	44537.2	56916.7	38814.5	37721.1	42195.3	27010.6	35557.1	35661.1	34861.7	54803.5	24753.8	62005.1	45713.2	39086.5	36873.2	29381.7	11328.9	44230.9	37080.6	51796.2	48792.3	39248.2	37702.4	51348.3	30887.6	40284.5	44446.1	48516.6	57444.7	32397.6	31413.1	40801.8	45908.8	32604.7	27514	55339.8	34690.7	45934.2	16871.6	50484.4	47303.5	33488.4	44102.1	42041.3	39071
0.55_614.8739n	95381	80126.6	101073	65345.4	77012.3	56832.7	59590.9	90254.7	97605.8	82710.6	42746.7	72046.8	88588.9	61300.5	59532.9	50524.1	115036	94958.4	52553.8	70787.5	68192.1	117974	83855.5	11251.8	62724.8	100649	62569	112503	119703	111525	72844.8	64039.6	71826.5	90609.4	66492.9	87621.6	83676.1	66411.7	73628.4	69206.9	75488.2	35710	78780	61061.4	138154	72041.1	89294.4	79131.1	93091.1
0.55_642.4130m/z	166825	141317	135595	93696	155709	164328	100027	149513	183640	144914	112715	90156.5	148976	162320	147405	125995	153612	142241	122845	134093	101195	133472	154987	140673	111422	146157	182300	141138	134090	123956	180388	120793	147179	167062	99118.8	153267	124722	125441	156650	121207	153599	121075	152438	127420	162383	124329	157504	136292	130295
0.55_708.4359m/z	248433	280476	141635	218531	258243	268275	200403	290028	151034	323056	149686	129043	224947	250689	162326	228014	232612	233651	237863	207632	180726	136727	217693	269045	145198	181613	206248	182604	246963	172214	276087	198981	202672	290757	229495	206810	172851	277152	255053	227266	240132	207282	265443	227527	275802	167568	213040	227485	254723
0.55_740.4639m/z	267261	277875	331176	290659	257399	434703	312261	444483	416938	311054	247224	196039	348562	333873	328713	349253	374675	248555	296160	151183	199608	218801	264908	179510	179313	293092	429181	327330	255204	229759	319729	274660	369913	493141	364775	342209	305444	302362	323936	322135	305488	324001	215834	363011	331094	247120	316883	284486	389029
0.55_877.5025m/z	99643.6	81339.1	99206.2	74739.2	66044.7	100310	77523.7	104037	65346.8	53581.5	42441	60709.5	105930	89476.2	48275.7	99620.2	100996	89760	67183.2	63378	61982	91692.6	168418	72574.6	72309.5	135798	185916	169649	132420	122018	143273	61078.5	84895.3	126773	96580.8	141285	131046	53502	122467	98697.8	98206.3	30402	94862	105853	91729.1	114711	138944	93505.1	79625.6
0.56_1360.4457n	1.07542e+06	439764	192985	132492	142015	63593.6	298118	93429.5	223371	65774.8	194269	247132	430243	150480	514294	482775	438522	237612	192301	289807	301434	314634	197934	566304	237012	230512	220179	197710	180720	113161	223616	410455	91013.8	93950.3	81704.8	69002	46397.2	395782	62996.3	412341	433675	375592	200353	801519	377570	232501	300752	201025	684326
0.56_384.2053m/z	9599	10219.1	7371.21	4561.17	5453.37	1356.71	3063.55	7519.92	4395.38	3931.94	6531.74	7066.38	6975.9	3125.44	4647.58	4190.38	1371.05	1087.37	1646.19	6526.66	12896.1	2147.29	10168.4	7217.22	10265.6	10859.4	22142.4	3992.79	5748.2	7922.49	4139.68	1247.81	6979.53	9836.44	891.059	8814.29	8713.43	4172.41	11741.5	6283.3	2868.99	5665.83	6604.37	4390.84	7315.99	5959.7	5603.8	5677.64	1476.41
0.56_528.7719m/z	24442.4	22865.2	8981.34	22167.1	14084	37302.4	41658.5	28626.6	233185	63761.1	26638.8	13514.7	11369.9	11619.9	20327.4	8858.16	9361.57	4408.9	6950.71	4374.41	5221.67	10323.1	2448.99	15269	14665.1	36954.8	52576.1	69300.3	72438.8	27294	23735.7	26076.5	22878.4	3817.24	105476	198905	167271	43033.3	18844.3	8215.08	7134.08	6118.44	13407.8	180.714	12259.4	5958.81	6424.6	8023.42	7584.17
0.56_555.2816m/z	345602	271219	325156	377486	326301	404616	315840	416738	357226	316063	271133	289585	346525	375977	295951	297371	335058	258046	317057	240249	269310	298744	257314	292737	263198	263236	386734	288164	332635	315192	382996	371875	379417	422239	284429	335734	341662	311807	272864	288211	327360	280519	286302	299322	400667	347704	307227	331607	341498
0.56_863.4672m/z	171379	193270	265320	229648	142944	167267	156305	192033	164061	131424	166797	206535	239374	176176	208541	211833	224788	210376	126706	232584	173176	165014	137681	105323	151230	232801	295933	211279	172326	179739	309001	239223	205102	313481	181009	231338	268809	200403	203930	184755	280345	160133	181707	197405	285381	151969	221910	145260	248884
0.57_175.0341m/z	42163.6	49735.4	47605	51274.1	31986.1	43257.9	39069.7	43239	35879.6	41737.8	29548.2	19737.8	34539.4	32885.2	48808.7	31773.2	32840.9	42369.5	14753.4	41603.5	26644.4	35063.6	20893.5	23950.1	32929.4	33688.7	31953.5	42964.7	36555.8	34695	29657.7	42023.4	36345.6	44444.1	44701.4	51291	45612.7	50877.3	37184.9	56500.2	36006.9	40422.1	39585	45172.8	36867.3	33228.5	31960.2	39363.2	33692.2
0.57_187.0630n	205860	180140	155168	180543	145459	173568	167081	164609	168023	120874	199862	201876	137684	209174	158700	148533	189719	181744	100230	182796	195670	183182	151321	174476	151422	150155	159408	146668	179495	161826	136321	163262	240162	186515	199199	163686	165556	191104	170912	223066	164184	170631	159655	181143	173107	182335	149634	207218	185742
0.57_211.9919n	49201.9	56523.1	50675.1	47974.4	28552.1	52122.8	47284.2	22561.6	58494.9	27363.8	52062.3	43306.6	57400.7	11492.4	51982.6	57314.9	52080.1	41796.1	36023.2	11191.3	55925.5	47830.8	22983.7	50071.9	74347.4	59638.4	41773.3	50183.7	32034.5	24758.4	62267.3	57438.5	43975.3	73438.3	61696.7	38121.2	74804.7	91468.2	62381.6	81669.8	81975.3	14502.1	66795.9	21563.5	72794.5	76139.8	61187.2	42427.8	70721
0.57_218.9198m/z	115694	121844	111462	105373	129145	76681.4	101257	113420	81628.4	109345	115673	138527	123500	63717.9	117457	109082	79370.6	114459	109010	110738	92641.5	95867.9	82607.1	108622	109573	91933.2	81908.4	93569.1	94565.8	99168.9	97739.3	98353.1	130241	106049	109501	115370	124303	69067.7	130051	134013	94536.5	73051.2	98948.9	104887	93716.1	92210.4	93787.9	113611	67795.9
0.57_226.0445m/z	58493.9	39139.4	36276.3	55769.1	47580.9	39581.2	40128.6	42459.9	45238.4	31700.8	40009.3	47116.8	27100.2	47375	37208.1	44264	54984.4	42857.8	25457.4	38955.9	49959.5	31918.9	50623.3	46552.7	39370.2	43280	42168.7	33258.6	42039.6	48264	38873.4	49541.1	54522.6	35591.4	49702.2	46648.6	48489.3	42213.9	35062.2	43561.6	34420.3	34828.7	40421.6	51865.8	47559.1	45941.4	41229.7	46500.1	37239.8
0.57_311.0087m/z	11030.2	16119.8	12576	19210.8	8373.72	17552.4	7740.75	11054.7	4851.17	8669.73	13783.2	7008.48	7274.45	9201.8	8475.58	11367.6	8934.33	100599	76921.5	63567	8256.08	19885	8324.97	5995.18	4350.97	11879.4	3898.12	23213.4	32967.9	19934.7	8931.51	14377.5	13486.3	22990.5	2255.38	26631.5	24795	20157.4	8396.85	13753.5	6030.76	5973.66	3559.94	13945.1	39385.9	46588.7	56842	144288	107073
0.57_506.2997m/z	214749	177433	183132	197322	180443	182026	163281	223550	166480	170585	141355	167383	173806	182173	165507	156773	167038	152083	155480	143112	133880	164558	162944	167155	156348	168037	163030	145810	136225	148015	205021	169231	198828	209437	187027	181356	176939	149972	162974	162437	190874	145486	158666	185080	192273	177324	168778	160585	182915
0.57_705.9058m/z	34716.4	36915.6	44976.2	42169.7	32552	40399.6	34509.5	21971.4	37883.1	34101.5	16240.8	30470.5	41134.2	18008	17190.9	26329.2	26564.7	33515.3	32778.2	28393.2	19191.8	27827.8	28263	17496.8	24776.2	32819.5	26260	12100.6	18437.2	25591.7	6241.53	38561.8	46266.8	26343.7	28473.4	30760.7	29652.4	32370	54987.2	32386.7	28591.5	32776.2	26582	26366.2	53940.6	26921.5	33841.2	41526.3	31045.5
0.57_706.3811m/z	101818	106312	97769.3	80705.9	82793.6	70134	64731.1	109739	93663.4	115569	84219.9	84186.8	136483	83376.9	64216.6	66082.5	56331.9	45760.8	89715.3	144908	104461	129228	166488	148566	133697	98416.9	108081	99103.8	63477.5	34351.8	135695	79141.7	78667.3	100966	84556.7	74741.8	116071	108923	108793	104228	94533.2	71445.3	61165.4	94047.8	87640.6	115712	104069	151050	85714.1
0.57_834.4553n	116963	91523	133205	156041	137870	108580	92595.8	50342.9	66090.7	99747.7	75822.6	70344.1	66590.4	90840.8	78131.1	45207.6	61089.7	75666.1	67692.4	81622.7	45407	60231.9	94702.4	74953.5	92544	90081.3	127372	73595.1	105909	75308.6	74804.7	74852.7	126018	86976.5	91137.6	82411.7	98673.2	60692.9	66364.3	75851.7	90485.5	62265.1	56583.1	68150.9	131356	86950.9	87543.3	84225.5	62280.1
0.58_162.0501m/z	45538.8	58829.8	42289.5	66724.8	40780.9	55236.6	48528.7	46967.1	49180.1	47545.2	60797.2	54730.4	41658.7	53885.8	54853.9	52266.6	55907.5	53479.2	35594.6	52258.4	57683.5	54660.9	50309.4	58206.6	52822.4	57117.7	57145.7	65886.2	58232	50989.9	45180.9	43274.3	52853.6	50372	62672.3	53044.6	69699	58125.1	62305.2	79350.7	61717.5	60932.6	54541.6	46222.5	53057.5	55276.4	53429.1	79851.3	46198.3
0.58_176.0658m/z	121383	142793	113999	167207	118460	140124	117872	119747	137746	126010	129289	122353	90647.1	138574	117541	120627	127934	126638	83031.7	134531	129784	141294	122432	120521	109532	123998	126423	147711	131371	111445	97160.9	98751.1	145740	133087	182079	126827	135020	151262	127012	204997	134491	124983	105345	109863	137025	113029	137424	164206	120442
0.58_280.9865m/z	18486.2	13723.4	10475.7	14025	15503	29980.9	28566.9	23427	29070.9	6073.99	21578.6	11216	19503.3	11713.7	19702.6	17737.2	25681.7	26647.1	15797.7	35702.3	17479.2	21932.2	25225.8	26477.4	34408.6	20427.6	10506	30423.1	41973.5	17336.7	16200.5	15952.7	19432.7	38635.5	27791.5	7583.71	32743.9	33944.9	31370	31281.4	36839.8	11182.3	34819.4	29913.1	38724.5	36395.5	38170.5	15726.6	39020.1
0.58_298.0246m/z	26307	34558.3	20265.8	36583.9	10602.7	9785.32	21159.1	32896	19014	11408.7	30382.1	32463.4	17814.2	16327.9	17643.6	26618.2	30745.5	15240.1	20847.4	38143.3	25553.7	41300.2	8249.38	14941.8	22034.2	47281.9	21906.3	22464.9	14332.4	35326.4	15344.3	15837	23270.8	21921.4	33997.1	30457	21918.4	27895.8	40903.8	63519.2	32806.8	25240.2	31801.4	23938.5	28220.4	29390.8	28537	43633.4	30166.3
0.58_312.0404m/z	69051.7	83855.3	78561.5	98374.6	66564.1	87237.8	59657.4	51467.3	64935.4	68376.8	64290.2	70263.5	61252.2	67621.2	54602	61746	67945	60635.5	28930.7	81896.4	67133.2	79923.1	60132.9	60520.6	39173.8	63377.3	65845.3	85843.8	68678.1	60727.5	47071.4	52234.5	76818.3	72360.6	100455	80264.9	81799.9	82614	89380.5	132191	76812	62012	73611.1	58040.9	69696.2	78409.1	78355.2	98877.1	65864.1
0.58_356.0663m/z	6851.11	7569.67	8501.81	9865.8	25021.6	9122.57	12645.2	54803.6	48498.6	15194.6	17147.3	7175.18	0.00437947	6774.87	16990.4	30417.5	17218.4	10303	3329.3	2185.98	3103.94	8833.92	7308.9	8888.15	25909.8	5093.17	5944.82	3562.41	5072.2	6126.56	337.063	2249	27501.3	11743.9	49629.3	39238.8	26825.8	19670.6	5208.59	17445.3	13156.1	29386.3	7117.22	38136.4	21941.1	19919.5	4888.16	9175.35	2044.89
0.58_422.8826m/z	86540.8	93528.8	90777.1	114975	96451.1	106801	105217	103297	84810.4	70256.8	97211.4	105208	119007	83500.3	99301.3	110242	86999.8	78336.9	118626	88805.3	86695.8	118612	78058.7	95902.6	80825.5	92260.4	86721.9	89624.6	83493.3	91716.6	97014.6	84564.6	109116	69895.5	96413.2	77428.5	84284.1	58446.8	112821	104998	97790.3	76385	107443	92741.5	102569	111659	93669.9	96259.6	79165.7
0.58_453.2103m/z	353823	287913	367989	449619	312558	362035	342038	384217	362582	308240	226276	308569	277233	342034	285232	344369	336142	319726	301498	283402	279565	279581	307934	322018	293041	277003	374375	276486	310182	277166	370638	334833	434043	358694	305368	364526	341894	322330	327774	303298	321808	356578	331259	360000	316208	369289	346000	382805	328622
0.58_667.8552n	56516.1	100642	87637.4	181015	136468	49357.5	44930.2	64795.8	58986	62827.5	74042.6	27296.9	57865.2	8519.47	25787.7	30554.5	36774.8	50865.6	38949.4	54776	27798	109432	50014.6	93564.3	107375	34463.5	39295.1	43719.3	62573.7	31458.2	68572.9	87208.5	65564	105781	98104.8	68930.9	112816	95106	41840.9	49337.4	47167.4	33166.1	64149.7	64928.7	43824.5	59039.5	41802.5	45158.1	39067
0.58_735.8361n	34386.1	21060.7	12620.1	41196.4	27741	13776.3	30090.1	11452.1	40460.5	85383	25462	59420.2	71163.8	81009.2	26107.4	21341.1	52462.5	28593.1	40974.7	17424.2	19772.6	41667.8	47461.1	21310	70201.9	89611.1	17143.4	14115.5	16052.9	34581.6	24116	19986.4	28817	48744.3	34313.1	32049.7	16481.6	36238.1	77934.4	80789	18970.2	41182.7	35345.4	35151.6	25093.7	11280.6	8819.48	49857.6	25458
0.58_758.4310n	191485	111504	170339	162355	193525	170227	102478	158833	130839	122959	143946	139211	123254	167860	141090	132791	122096	102370	85352.8	118389	112860	47337.5	111202	165492	147593	103597	201857	124490	114287	147115	166153	189127	197632	157799	165766	159070	150732	98378.9	131749	143303	171913	134749	141770	123137	145428	122413	97562.3	118167	96760
0.59_1079.5272n	18212.3	28828.6	48706.2	615.96	111703	409834	638107	513848	137637	907251	173324	7291.18	23731.7	34718.5	5988.76	84017	40397.7	182781	231588	49924.9	25002.3	4788.65	5955.86	33431	170688	345230	340016	799612	299347	160256	956.322	104220	190341	465120	1.05178e+06	1.64138e+06	686507	261338	39356.8	36504.4	5891.24	26219.3	7607.07	43124.6	184510	25755.1	1028.14	148536	520990
0.59_1322.5548m/z	63702.9	2860.35	58689.4	10886.8	59740.6	863907	932028	8.46825e+06	1.41734e+06	2.26233e+06	1.81075e+06	331581	97762.5	138103	145697	225527	111323	266793	81366.5	108968	105109	166157	100756	129363	126812	76568.1	57272.6	76006.8	375.357	42691.6	124619	21039.2	282574	447864	1.30619e+06	1.43292e+07	5.57479e+06	3.3721e+06	576958	336817	60904.9	459.151	72646.2	208333	128258	237831	25099.4	61260.3	95553.5
0.59_1436.6601n	254140	67082.9	187399	117733	217212	375355	481823	1.86219e+06	1.53744e+06	755677	697806	311613	184434	175271	177704	279593	137431	176203	178738	147811	231258	160444	177133	266799	434946	95625.7	1.07765e+06	603103	532825	335641	129938	159158	526944	852608	687525	2.47821e+06	1.60749e+06	618852	693029	149531	119882	156487	221670	147770	206423	263526	101697	225280	257703
0.59_284.9932m/z	14795.2	26333.2	32887.7	25707.3	20095.3	10202.6	25299.4	20522.3	21795.1	23607.5	28951.8	14481.3	20862.7	18742.3	27018.7	21164.4	32321.3	22033.4	9740.13	23345.1	24297.3	30806.9	54880.9	30504.5	5695.87	9550.4	14729.1	12974.3	31394.4	28636.4	4101.11	27586.4	46916.9	30041.3	25161.3	69880.3	62188.5	21212.4	66155.6	93034.9	109715	16034.4	55355.8	19403.3	23796.2	28159.8	26061	39933.1	4660.63
0.59_334.1375n	43988.8	38344.4	46456.4	75860	43115.1	44025.5	57681	51870.2	47162.1	46585.3	47173.3	56138.3	73624.6	49368.4	42277.7	52324.6	57248.1	54423.8	46161.9	40438.5	30722.7	23438.5	37319.3	34106.9	36963.8	35198.5	34211.7	24209.2	30541.1	19549.7	52590.5	31492.7	66094.1	50558	48126.9	75926.5	57248.1	71534.8	36935.6	59457.2	62188.7	55713.4	50852	74743.1	64801.9	73984.5	29706.1	73771.8	29642.4
0.59_406.9526m/z	51921.1	39888.7	36205.9	53295.5	81368.4	35329.5	28110.1	18565.2	23961.5	34159.2	21768.1	20659.1	49774.3	22231.7	37960	67433.1	33026.7	153218	30143.3	26806.8	39154	32216.7	26045.4	32893.1	46920.3	50031.1	33230.8	86039.9	44117.7	34714.4	15368.7	59336.6	49408.1	62843.1	52865.6	22587.8	20116.3	27331.9	19924.8	26799.2	29036	35283.6	5940.97	65362.5	72304.1	104762	43195.1	42132.2	57347.1
0.59_415.1527m/z	3043.68	2713.1	4218.2	1813.73	1895.13	8427.37	1555.64	5.64551	7691.3	3653.77	8831.71	763.491	1392.89	7424.55	8142.16	9344.53	6159.56	3633.41	1701.93	1259.81	6407.18	1395.94	2562.33	5131.67	4388.91	2358.08	1084.68	3325.27	4173.01	5872.56	3733.78	8103.36	4315.02	6776.11	4032.59	9273.82	4147.57	16237.6	18817.5	12082.4	12434	12687.7	7899.14	5047.99	3448.62	522.091	3365.92	5272.43	7809.84
0.59_514.8751m/z	38786.1	40438.3	37896.5	22182.6	31547.1	16189	7637.94	27053	14742.9	11237.6	33518.1	40710.4	13674.1	27852.7	25752	30378.7	14946.7	20850.2	38402.5	21903.9	13643.9	29046.7	19590.4	13869.3	44188.1	21226.9	9616.71	26552.9	28378.7	25750	27751.9	12682.6	28337.3	32218.5	32904.3	33541.3	27476.2	33452.6	43138.1	28739	34588	27713.5	27681.8	12058.2	17334.2	15548.3	19218.8	17312.3	26628.7
0.59_542.3311n	685582	341609	636704	862205	652522	703405	435020	887556	493928	432036	593331	479751	379588	503754	640950	525603	523494	333297	457284	566417	624547	640368	438440	612400	722230	368138	734543	379439	459246	417283	823275	812866	786781	692853	592842	695220	526642	383828	512037	510185	628841	677454	488332	446582	677072	387628	650245	331316	613084
0.59_609.3470m/z	691688	636822	660747	653807	705119	635774	579063	733663	570777	600203	550080	647200	550680	570482	629298	622239	586991	582480	574497	599173	537173	547116	509825	634457	548933	542345	648882	558043	609198	552780	775534	697635	759345	750396	625152	657149	587660	454294	577292	589809	610264	570208	582790	638986	657476	534142	635913	591918	614756
0.59_653.3750m/z	217024	162837	296921	318288	247979	207018	143737	357060	168888	186518	226682	221375	208476	181078	280779	189311	193336	215113	150945	250527	216544	211956	181584	291102	314669	147831	298496	190438	273041	191210	267068	237006	323524	331813	182277	268955	180287	168723	227849	207507	227242	213307	205957	253645	240663	174220	215951	211900	253241
0.59_669.3479m/z	116232	74406.3	155212	155634	152919	138470	104420	178702	108550	76034.5	127120	111353	66119.8	130952	174302	111037	114915	96678.1	80260.1	118821	165820	116580	68321	101518	180041	93449.8	159979	83072.3	70343.6	91744.7	166159	146878	193166	180432	129940	79327.3	109037	85281.7	106425	101008	139063	174731	78862.6	114508	173872	117463	163663	92151.2	163446
0.59_674.4102n	394942	251312	272083	325157	300109	308015	270608	477017	324478	269613	280623	232878	260075	336588	297785	263653	245963	175168	187235	300523	330831	245948	243112	273860	420582	207201	383924	212835	206824	209384	317653	346704	373873	385428	371877	394171	300819	229167	268551	280008	306361	363291	252551	286970	231315	198717	301315	286995	257097
0.59_736.4678m/z	100658	52110.2	131228	154970	99484.3	62383.2	31530.6	163330	79539.5	77636.6	88625.8	123471	79697	114261	126541	107850	122080	97704.8	55522.5	141252	46365.9	90243.9	119881	156006	136290	84640.2	113050	76025.8	134791	44182.4	146726	102896	122770	110846	116535	112802	117228	65179.5	108345	60496.2	116934	165670	68081	80946	187006	76418.5	105889	57113.1	56727.1
0.61_1141.3217m/z	33649.2	3553.95	44304.3	91949.1	55313.3	267646	388372	101340	53110.4	21977.4	16961.4	34806.9	46816.3	27230.4	19382.2	103151	85091.1	89313.5	10432.7	3010.82	81586.1	71027.4	10975.3	139199	208571	64235	239349	35007.5	260678	503850	10261.1	22655.3	214994	149832	280617	159407	72048.8	7903.1	21940.8	34742.7	133493	51368.1	300511	66173.5	128966	49772.3	27919.4	16873.8	78847.2
0.61_1198.2990n	435514	388491	500080	317978	695196	361078	396714	454811	638222	470896	296571	465553	363827	592005	255437	678885	649250	349651	564903	629558	535022	687373	634299	644768	754983	855099	575258	404140	649226	530760	466449	406500	740460	155708	316639	702815	687855	291436	502581	422356	454863	303419	299801	524779	241056	653837	562847	682646	962712
0.61_1240.3377n	637473	437252	665304	503151	619683	503070	967510	546523	571021	511270	316327	491972	651648	599788	71964.4	507625	690681	580134	463735	744213	686360	397928	735483	786153	767594	438991	668134	640468	654981	348424	788999	377889	615430	555628	299113	807817	881428	400949	440158	307679	601327	366760	592207	693950	1.06004e+06	488723	653886	653282	637332
0.61_1282.1015n	1.0532e+06	484444	966738	590696	278735	1.0262e+06	938826	628416	1.31077e+06	785975	1.11507e+06	783562	1.09217e+06	1.15732e+06	1.06352e+06	1.48772e+06	1.06587e+06	932047	520127	460182	535430	429514	641819	674955	584575	591098	531664	826996	814038	629572	1.11423e+06	473976	984624	1.64456e+06	715696	909618	944431	1.17283e+06	1.07251e+06	1.08201e+06	1.68278e+06	1.19104e+06	638382	636046	831979	869745	605441	763322	693126
0.61_1366.1225n	480563	162585	274243	174894	312328	568729	248046	271868	456410	230449	272505	250159	379551	315806	280486	191253	316964	384693	394349	418141	320092	433107	477653	323233	498434	114823	425385	557357	631067	267286	379116	363707	293666	306571	293496	336041	534101	307020	235097	232320	206762	219528	309990	303954	432973	289082	338700	306841	388336
0.61_1391.3743m/z	11119.7	21652.7	97818.9	143558	57204	38011.9	238912	264604	192095	27295	86743.5	104703	56716.6	98237.1	20276.4	25812.6	51288.5	116717	229718	68754.6	206584	178652	365766	568098	345706	90040.9	122958	26942.7	31355.1	85380.4	88535.5	65248	175345	232489	311997	85719.7	36966.5	185245	86922	12632.5	63243.2	37916.7	71065.1	17171.3	12220.1	118646	128645	105946	258953
0.61_1460.7111n	272530	398125	549788	345990	467760	561832	508306	353094	480034	637692	475635	266117	236494	437158	302037	299452	483073	572855	437201	330299	180994	501863	341134	441010	412281	290694	565597	196714	603697	292710	425905	309332	578550	121833	521006	332410	479387	582690	172804	259258	516129	763511	508194	683252	226736	150554	399067	518121	681657
0.61_1639.5593m/z	44267.5	702.156	98333.9	13284.9	97207.4	35666.8	34787.6	37577.5	58795.2	61462.8	70024.5	9697.43	20452.3	49781.2	14623.3	78132.6	21007.1	27492.1	80209.6	85168.3	76133.8	21485.3	661.266	18643.6	22644.9	56122	96643.5	128144	26690.7	72355.8	11277.4	57391.7	48156.9	39798.4	16422.6	11969.6	113178	19579.9	96635.9	138544	11811.8	94929.8	95054	27973.2	63647.5	50108.2	17415.9	29915.9	34607.3
0.61_1783.6070n	39999.8	8846.4	6123.1	8010.09	18566.5	10326.4	32448.7	17597.1	60049.9	18436.3	8959.66	6839.44	527.388	13630.5	374.742	9985.93	9017.54	53607.3	31810.4	32104.1	27386.9	56979.7	7621.24	5561.62	4864.4	19849.5	15441.3	10165.4	997.149	22287.6	8342.83	5066.61	12334.4	15916.3	27189.1	18460.9	34558.1	19622.8	14443.6	13269.8	5198.73	7891.71	12379.3	19144.1	27125.7	50888.6	88076.9	227.097	816.572
0.61_477.2678m/z	90212.8	70481.6	103232	120882	111180	114226	69807.9	120663	90606.8	76969.4	88973.2	66369.9	69747.8	95423.2	90519.6	68129.2	85426.2	65097.1	76257.7	73535.4	86855	102896	49116.6	92656.1	94706.7	64849.4	124128	46075.4	94531.4	63544.3	118120	116579	114799	126564	95452.4	120772	84681.6	65292.2	94055.8	96473	91737.5	117287	87061.5	71897.3	120043	65956.7	86310.5	59874.3	94797.4
0.61_498.3043n	316686	155801	300605	395649	342558	408629	214169	440233	244500	165202	258217	233196	145058	305385	348532	293868	314530	150324	208893	278489	287153	301265	171145	259397	391453	160518	496346	182197	268478	200690	378828	435497	385815	360312	301698	334107	255980	210073	227229	230643	300139	376126	264913	270042	417909	193828	373574	136163	358754
0.61_538.2971n	310763	218458	281932	425074	309820	336709	250409	395868	274540	257183	258274	254812	227804	286005	275031	281288	258857	200158	256752	258421	256185	244977	229613	296826	283068	186372	326392	166798	236436	179020	340855	312352	388893	384998	296936	311573	297016	251567	265569	253535	279133	274201	264734	240543	309926	258376	307908	274639	303005
0.61_648.4166m/z	229819	111307	218681	244894	177709	211440	83073.2	240626	158182	92481.8	134990	154154	72193.8	184043	220395	159759	233223	73087.7	130706	209093	194240	193259	94628.3	173095	242529	86286.9	291362	145605	102784	118722	280338	327215	257118	210378	149895	203767	146670	123181	134726	147272	185646	253597	206059	168369	221570	68507	246392	103476	199620
0.61_692.4424m/z	236679	122733	258068	235061	233221	188624	117469	223217	105531	120371	95976.3	81753.5	89828.2	137064	220383	151441	149643	84691.3	111033	177518	131548	199746	480436	169251	241011	111953	237022	78872.4	86481.4	136955	238327	230098	178407	202712	206876	266256	109736	157286	112854	157741	111922	259618	177620	187421	230529	80349.4	203650	91294	127613
0.62_1250.2783n	1.19516e+06	455382	1.02805e+06	494641	460759	602083	430398	439946	481761	519721	613844	429554	470404	552884	478290	515915	438041	453056	496601	422911	416336	424350	482954	650013	864008	399625	440386	589476	571657	521903	1.03718e+06	579724	578330	616974	354398	688498	524224	438379	543525	465435	348827	428264	231499	420038	374732	443612	544483	758996	405435
0.62_1256.7920n	729816	700886	496731	411020	426353	521690	604012	527418	477234	642503	389492	499750	627538	456768	623755	354612	540958	686059	444962	748389	378565	407612	436801	480428	842717	351610	691847	648890	654839	676303	606198	372095	799336	633869	466978	791841	635460	577764	895015	761991	610165	403229	530188	500278	818080	629961	234211	509834	801661
0.62_1327.6367n	649942	380999	506662	519126	411540	422186	215715	579409	627460	480765	625261	462936	591285	590909	432312	293986	611075	588984	527735	275889	585992	442250	430218	428808	446721	361537	604057	364335	435180	559858	430066	505598	581491	396871	218306	488831	473239	497372	447080	659512	424214	444617	466447	383092	539613	705367	541658	614928	385831
0.62_1434.7851n	225336	73107.1	74291.1	240265	202759	437029	138937	153454	140300	152530	136983	231159	242307	219326	134342	154706	132221	121994	144144	126220	151032	371466	144983	230037	219496	81112.6	118804	122550	95569.8	334992	171260	158422	250296	342195	56099.8	258522	415857	184359	165537	107076	232924	6339.44	249416	200007	290169	186498	347779	156834	318173
0.62_1512.1225m/z	51751.1	56667.9	102197	71040.2	135551	6953.39	6180.18	57549.7	26956.1	41688.4	1984.68	22060.7	81388.7	31016.6	9485.39	45630.2	2718	46771.4	15272.8	35392.7	60218.2	67971.8	49953.8	194627	21063	47140.2	47267.4	838385	269332	120345	58646.8	100386	19151.9	6874.54	60125.1	63077.6	19073.4	24651.9	31378.5	26136	782.051	16344.3	19139.1	62272.5	65443.1	11538.9	35676.9	28173.6	19778
0.62_1572.1621n	31976.8	5207.02	8863.4	4847.57	1817.8	71529.6	5287.2	198354	30140.6	115894	100261	86691.2	34975.3	121317	74882.6	23474.5	22696.1	55404.8	24269.6	62439	71238.8	59112.9	69846.8	82002.7	116832	102866	162193	30569.6	15040.7	1443.19	27164.2	2922.98	80947.9	105749	58437.4	185071	113117	74275.4	113539	3465.54	95260.6	26919.4	49948.4	72939.2	52998.8	12535.3	41295.8	135613	92157.2
0.62_1608.9938m/z	177242	1.17892e+07	5.16011e+08	8.36849e+07	1087038640	2.39352e+08	1.08927e+07	1.08871e+06	90628.6	6133.32	56081.9	205235	224750	45286.1	22608.1	17686	10926.7	14913.8	1310.01	21749.1	138153	29328.4	42397.4	81137.8	81980.1	103429	181865	19513	36963	19235.3	3.13006e+06	3.21712e+07	1893616170	1.11735e+08	4.52106e+06	153994	32553.7	48533.9	68321.3	16381.4	49742.6	108245	59344.5	11973.7	11961.6	14978	7974.46	40714.2	95235.7
0.62_185.1279m/z	10542.9	9005.84	8059.98	8458.06	17446.2	26253.8	22491.9	10496.3	673.586	5857.6	3327.63	5582.1	5988.01	6492.42	11170.1	2899.46	1777.75	1215.91	4593.37	4696.74	6239.21	5680.61	3846.47	19634.7	7916.02	5322.83	17978.8	1964.93	1620.03	3168.66	11633.9	23529.1	11286.8	3484.58	18505.9	9902.69	5854.52	3119.76	4717.89	6706.59	5920.87	2097.59	7838.44	1660.79	2308.9	5907.12	4735.73	30827.3	3277.02
0.62_246.1684m/z	32534.8	43642.4	40820.1	26304.8	23744.9	38016.4	29904.9	37992.9	26771.1	38546	67786.1	36479.8	29375.9	76652.2	31017.1	23275.9	100192	24058.7	20075	38570.8	36602.4	55957.5	21256.5	29763.2	29398.4	35461.3	22038	27043.5	7607.35	22555.2	24724.6	26188.1	34655.9	37961.5	54352.3	48389.2	44087.4	56802.1	54165.7	56925.3	52094.3	30708.4	41605.7	39055.1	34961.2	34537.7	48698.1	62045.1	31788.1
0.62_282.1937n	204487	174513	186203	158206	181173	164942	193997	230241	176858	182460	143131	149980	164839	158250	193812	150557	144527	156908	153890	162676	169151	168779	171972	180903	168640	159524	176025	148606	112885	138512	234047	165984	184620	165626	211090	187801	154730	169207	148386	179068	172029	152783	181361	203184	161053	184274	169005	159558	163869
0.62_303.2046n	184420	186003	269318	72463.3	93465.2	217366	230219	82513.7	152210	238002	146668	128736	383317	94119	301853	142875	190175	164036	97598.7	100727	127325	219902	125993	199505	204214	112077	215927	125385	139904	179171	272322	164999	165135	157966	174196	164796	310336	118789	178634	188013	264717	129434	297985	260050	265578	252934	184628	221975	187267
0.62_313.1552m/z	26816.4	26862.7	30179	58051.6	39600.6	29081.6	27652.1	21260.6	25772.7	28583.7	21794.1	29830.4	36589.3	29014.5	26768.3	28863.3	35906.5	31410.1	31665.7	31963.8	32363.7	18045.3	47720.1	34071.5	36191.8	37911.6	24838.4	14615.1	19266.8	27518.8	35054.1	23109.8	35850.9	35476.8	33495.2	44392.7	37960.8	43388	19557.2	20713.8	24624.9	35396.7	22976.4	30840.5	17036.2	37831.9	21302	61474.4	22057.5
0.62_347.1970m/z	46835	41514.9	46874.1	42786.1	39331.4	51045.1	53103.5	56380.6	51192.5	44294.4	35781	47140.4	34063.8	28537.2	44679.6	36638.3	37117.7	39454.9	24105.6	39397	27019.5	25576	26721.7	38408.1	33787.2	29528.9	25909.1	24121.8	26648.4	29740.4	46850.2	32206.6	62350.8	48043.2	57360.6	52835.8	50314.3	36910.4	45391.9	41031	47758.9	39136.3	47116.4	50301.1	36495.5	43794.4	30095	32921.6	26410.2
0.62_410.2518n	192224	112537	171556	214550	176802	191042	120383	184411	131499	101232	140350	123911	90646.1	186098	183799	154487	173021	75584.3	98657.3	160499	177870	183174	148233	181070	208085	103353	235683	113394	127076	96502.5	200682	225746	225845	186147	151625	201020	156654	100254	122724	140020	189009	219366	168915	133549	212443	120219	184833	79966.4	196341
0.62_472.3117m/z	191027	107726	158129	202805	180634	201106	110539	224615	142179	120875	136139	109888	83684.7	180590	174044	139458	171907	79748.8	131581	148094	174816	162285	104151	144690	188912	114145	204082	102882	108434	110835	224350	223542	199837	178210	150564	193976	143115	105002	122339	141986	162650	199336	140964	132380	196080	96422.3	179122	83578.2	167081
0.62_518.3521m/z	101290	82495.7	99772.7	127020	87056	96486.8	85713.6	129403	82154	86105.2	70070.5	69810.9	89173.8	85670.5	95196.8	93909.6	101388	48814.4	69745.9	91178.5	80264.9	96206.7	76660	107444	108971	85477.9	120530	77083.1	44789.4	51789.8	121226	107504	108174	124317	106235	102338	96112.5	85182.1	85652.4	71359.6	108021	111092	95782.9	68236.7	103380	89263.2	81199.8	88938.3	102633
0.63_1321.6264n	739490	115660	591593	533866	1.06972e+06	688365	183678	513006	456787	390403	551695	427395	800223	610568	417973	198894	316303	159220	203303	487053	155111	132231	303738	164632	320277	154919	636412	720424	588731	817885	368963	216725	1.31104e+06	434953	330468	671496	573515	238845	606172	877584	699552	207730	116918	223421	225181	110173	192897	287856	140536
0.63_198.1098m/z	49222.6	52404.2	46105.5	41962.3	51979.5	39933.6	54039.6	44876.9	50572.6	48275.8	51637.5	52665.1	46907.6	42673	50583.5	42400.1	34948	49807.2	54353.3	47553.6	49042.3	47706.8	42250.3	58297	52770	61208.5	36341.9	47677.7	40282.6	41456.5	47174	46184.4	45599.3	39696.8	48568.1	49887	48108	49509	60822.1	59419.5	37005.9	48512.5	56616.4	43991.3	42057.3	52752.7	42097.3	46055.1	40111.4
0.63_260.1824m/z	23742.1	23705.2	27696.5	13648.7	15100.8	19917.6	22409.6	16186.3	15002.4	38548	22575.7	20983.7	20340	19632.9	31711.5	15562.7	20398.3	22978.1	27644.1	16473.7	26668.8	13685.2	18381.7	12275.5	17440.1	17999.7	11488.7	16679.4	20882.9	19719.1	22108.4	15702	18858.4	16001.8	27503.4	27427.3	41274.6	16042.8	22461.9	29633.3	35931.8	29851.9	39206.9	25494	18259.6	28044.6	14728.5	22693.4	17679.8
0.63_269.1304m/z	22495.5	25226.4	18758.5	17539.6	29960.3	26022.7	35348.7	26370.1	33053.9	19868.8	22337	42755.2	30415.9	20634.1	30943.9	15829	23177	21087.1	18809.9	29644.9	21631.2	14378.1	18644.1	23944.2	25917.7	18120.9	15224.7	14846.1	14305.4	16108.1	27246.3	27931.1	97982.5	20104	29947.6	24050.2	32700.1	18828.8	39104.4	39882.4	22169.6	23632.2	39383.4	29240.6	23221.2	34835	24991.3	17875.9	16322.2
0.63_279.2037m/z	6315.1	9070.34	4432.9	4825.35	3782.13	4419.55	12872.5	9557.68	10028.3	5729.63	7736.35	5185.23	9957.4	7069.2	24095.7	4902.78	7369.54	4994	13369.1	8382.8	7651.21	10765.6	6376.86	7288.88	8002.26	11436.8	5388.66	9300.47	6713.76	9064.37	4849.63	3403.38	9834.63	6488.68	13994.6	5999.67	13620.5	9660.71	6611.95	5962.41	8336.43	6136.93	18065.4	9185.19	5503.77	10881.6	3013.96	5487.56	8110.26
0.63_287.2083n	453299	372290	508406	291599	339066	402401	395865	363610	362775	610300	385829	370135	475465	419395	536238	348814	371277	322409	379949	393647	396510	464348	389923	383659	360540	342656	312493	255222	398277	347126	430071	349391	381802	315776	379943	464584	529665	370241	378771	604652	688997	380279	557002	497313	486549	483410	473321	494647	403814
0.63_337.1841n	74370.2	66894.3	80116.8	57953.5	59441.1	65138.2	72361.3	53765.2	63602.8	67641.9	63571	74228.2	64237.8	75114.6	86047.8	62604	56707.4	55447.2	58437.4	67312.2	59915.1	70506.7	55304.5	67695	61068.5	63493	47743.5	47970.5	46427.7	61305.8	78133.8	63815.6	61424.6	58308.4	68641.6	66533	74119.3	59794.7	69060.3	78572.1	82514.5	64121.9	87629.4	92329.8	81025.1	73805.5	58689.2	68947.8	73311.8
0.63_384.2639m/z	98878.6	72690.9	108978	105394	104356	108973	90298.2	126935	89715.6	79268.4	85889.9	88363.4	75665.1	119132	125284	102379	101899	63251.4	82671.7	95986.6	108377	105314	81656.8	95706.3	113457	76201.7	99608.4	58120.9	69262.7	94396.2	124496	113182	109408	95276	94585.8	107113	84963.1	83845.2	96234.5	102382	130736	112231	103169	92502	100568	91056.6	104275	89495.3	126596
0.63_386.2741m/z	56549.8	44478.9	55184.4	55409	49535.5	54451.2	56972.6	65856.6	64991	52880.1	45050.6	49703.8	46230.8	51856.8	58303.4	53244.4	51044.4	51997	45880	51395.5	66554.2	54434.8	50399.9	51634.9	55945.8	55131.5	58098	45653.7	56211.9	33273.3	65953.4	49264.8	54536.2	58290.1	56309.6	61521.4	52005.3	54830.7	49825	48267.9	71226.1	54334.9	62279.2	54880.4	62533.6	57903.4	54790.9	50393.7	58429.2
0.63_399.2638m/z	20008.8	13000.3	20164.9	15987	19283.6	21711.4	18466.7	19127.8	20966.1	18606	23247.6	21939.5	11398.5	21787.9	15535.6	14578.3	23801.5	14808.3	16317.8	18637.3	22242	13912.8	13259.4	16764.2	17308.9	16287.6	16836.2	13513.1	15603.7	11749.3	20515.9	16416.8	19544.2	14960.1	21188.1	22462.1	19544.9	16060.3	8986.59	19071.5	22755.6	25599.1	30162.4	29304.5	15377.5	24362.2	20111.7	17944.1	14910.4
0.64_1140.3136m/z	16553.6	6044.88	9509.23	11994.2	40647.4	75594.9	257280	881994	338966	7724.9	38061.6	40543.9	13882	11255.7	7227.73	124445	21638.5	4487.15	44063.3	9000.09	908.724	11843.4	42268.6	5369.93	101701	30871.5	26837	13550.3	7437.33	4994.52	5470.7	864.476	19220.8	80731.7	145029	1.74458e+06	646502	97395.8	8107.11	6910.25	5416.34	4834.59	26212.2	49364.7	6898.24	498.4	8650.19	15384.3	17196.8
0.64_1586.2826m/z	20389.5	33412.6	26369.6	1093.29	61899.2	21407.1	47185.7	66713	31016.6	30069.4	3705.99	39075	14260.8	8650.3	1971.39	9765.63	5733.44	4112.76	11036.6	113961	74900.6	42830.6	122825	4353.95	84941	201623	111166	432576	247479	78398.1	82768.5	38687.1	38509.2	55256.3	5094.96	6423.58	15232.5	485.51	41273.6	1035.4	6753.87	37362.7	10539	9852.19	10019.4	7443.54	37223.5	11619.7	49573.6
0.64_232.1536m/z	30779.2	33260.4	27464.7	26371.2	24450	25886.8	24458.8	22783.9	22429.3	23298.8	40237.6	28832.8	21894.7	21904.8	43893.1	26612.2	33653	27069.8	26737.9	31204.7	24314.5	25358.1	22231.2	24579.3	44788.5	23565.8	25671.4	30941.4	20106.5	25076.4	25305.7	28243.1	39735.4	29275	41769.9	35965.7	37514.9	37813.3	36850.7	33506.3	23909.1	28011.3	32354.3	32754.4	27299.5	24198.5	34438.6	26833.8	14078.2
0.64_312.2160m/z	52089.5	41535.5	59606.5	25465.2	117501	51186.9	58474.5	32051.8	46522.9	49397.9	41715.2	52242.1	55752.1	31983.1	55454.6	33721.1	41976.6	38058.6	27851.5	33445.8	37417.1	46482.5	33001.1	41445.2	33398	40179.6	35138.3	26788.5	40112.1	35836.2	51023.5	33681.5	38407.5	31651.8	38318.1	40119.1	61490.1	29906	47283.7	54739.3	70492	55388.9	63336.5	77092.2	68171.1	46280.6	40744.4	47691.6	58761.9
0.64_332.2419m/z	36123	27097.4	48770.3	17556.6	22830.1	17297.2	37121.1	30081.6	26045	15659.4	20996.2	24083.8	36566.8	38271.3	45146	29836.3	37121.1	23669.7	25451.4	22115.3	40563.8	46370.1	71834.1	19815.5	25003.2	38753.5	14364.3	11718.3	34692	40669.8	38198.8	14316.6	17838	16129.2	19955	35442.3	33746	28199.7	19968.3	47872.8	84769.9	28982.6	47060	34464.1	38063.4	45570.7	42700.1	40478.7	31788.7
0.65_202.1183n	116124	102822	84372.8	80306.2	110108	81316.7	94915.3	78862.3	94615.9	79390.7	91019.2	106327	94529.1	79425.3	95759.7	91389.5	94611.8	89904.9	92973.1	95084.5	72713	64971.1	57396.6	77535.1	67143	74581.6	51522.2	73413.1	59097.2	75631.1	109284	100029	92287.8	69006.1	90200	97090.3	109362	85312.4	110468	121315	90917.3	73375.1	106110	107251	86029.2	90929.1	80907.8	105038	77546.1
0.65_206.1525n	55114.8	57086.5	48256.2	42909.3	57178.7	38766.5	48036.9	42529.2	47793.1	48682.2	55950.3	65673.8	59553.2	41803.1	70793.9	60249.2	47189.2	64604.4	43377.4	47218.8	38155.1	36311.5	26014.5	40155.2	34753.3	34558.7	25670.1	31736.3	28350.8	30296.8	49882.4	44908.4	53307.4	35051.1	50276.7	56716.1	54282.7	33703	61124	72791.7	57845.8	50171.9	66062.4	60180.4	55064.7	41872.4	43509.4	52578.8	39485.2
0.65_313.2255n	549086	431132	835464	275633	259016	643318	500892	609715	445877	778275	445837	397603	600364	818519	842093	404236	506275	416204	476205	518434	585242	786416	631071	469371	362871	410736	358803	195458	613302	400907	556869	348445	411397	467735	423991	722537	846552	426085	468335	1.0112e+06	1.27927e+06	524913	793342	747968	749284	778114	684485	820041	746752
0.65_597.2820m/z	10478.1	12307.4	6453.5	8192.14	6606.93	5740.08	6165.05	9087.65	7550	10779.9	8708.15	12848.7	5635.04	7152.29	9049.61	7364.43	10612.7	10982.2	5109.5	7489.51	8349.06	8222.14	6072.32	11142.7	4688.56	5925.79	3755.84	6580.75	4160.12	6402	2314.09	9786.67	8395.44	4282.97	5684.76	8224.27	14218.3	4470.51	10535.7	10916.2	9639.51	8916.25	11646	9756.49	4003.56	7286.56	8078.96	6587.96	8343.58
0.67_294.1474n	197064	176764	166765	152869	175453	163837	157310	144776	164421	147934	156153	159589	154664	142611	153085	166493	143387	154253	130889	140496	127147	117350	143358	134539	143424	150735	114278	127022	99869.3	135786	176976	158961	184104	142419	144851	164156	179980	140434	155757	162222	143099	136564	153044	178320	146136	148151	118087	157005	127442
0.67_316.2483m/z	687274	387203	1.04523e+06	311458	318203	699896	453932	655377	465261	1.28808e+06	612824	474965	787332	979249	1.00776e+06	444589	656387	401981	832882	910017	949303	907754	1.09664e+06	552439	411592	722365	342223	219820	1.06774e+06	516418	622891	285859	373740	400472	538327	1.14484e+06	906889	670120	439680	1.40858e+06	2.02802e+06	690622	1.13146e+06	807643	884273	1.01264e+06	912765	1.16777e+06	903854
0.67_340.2466m/z	101087	76156	136357	68592.8	67236.1	108068	100395	164963	91503.5	85883.4	84600.3	80562	101751	127822	147165	84795.9	84755.7	56857.8	72748.5	80020.6	102120	130800	151097	83157.4	77488.2	91922.7	74534	53040.8	89025.7	84132.5	115663	68245.6	87665	80500.5	91656.5	121116	135164	82726.3	69167.6	147344	176010	102219	114074	129126	109633	95921.3	106895	133244	146425
0.67_360.1762n	54572.9	49847.6	48675.8	45639.9	57138.2	44722.1	49696.4	46619.3	53003.3	56812.2	52037.6	52357.4	42328.8	43369.9	48908.8	53501.2	43838.4	55466.2	46399.4	47450.6	39169.7	36192.6	28155.3	49890.5	36984	44939.8	28692.7	40914.6	31105.9	40147.2	50443.1	44959.5	52039.7	46578.4	48044.9	53516.9	54232.4	40787.2	53670.6	55482.3	48226.3	48488.5	50518	59064.8	52516.9	46998.3	41211.1	57087.9	43424.5
0.68_334.2312m/z	50760.1	46914.2	40695.3	39284.3	45892.3	40529.5	44631.3	37119.4	44213.5	45094.6	38533.8	33516.9	52861.1	36665.9	44758.4	32845.6	38647.7	29565.4	27901.3	33006.3	36772.4	20808	35933.6	34343.1	26906.9	33655.5	17343.6	30964.3	22514.1	42376.7	50096.2	34258.7	58550.6	33935.6	42226.5	44245.7	59623.9	37781.2	41374.1	41720.2	50699.3	37438.1	47829.1	44194.7	29151.3	36899.8	31451.4	39027	37082.1
0.68_446.2552m/z	28664.8	36209.7	35868.1	38530.4	33944.6	40664.9	56227.6	51934.7	31945.8	53786.7	57814.1	57263.6	39587	64047.5	66029.8	54243.8	53038.2	79466.8	71377.9	63878	72561.2	64259.7	46949.6	78220.3	72680.7	64873	46754.4	49243.7	48038.5	38225.3	28388.9	41101.8	28176	40256.5	54721.7	58624.9	40107.4	53393.6	72746	46939.9	50112.6	57041	66097	41669.5	53691.5	67980.9	64729.4	50553.1	43633.1
0.68_456.3315m/z	14416.2	14022.4	42090.2	14564.8	14182.9	23711.3	13995.3	16023.9	17821.8	20753.9	12443.3	11359.2	23863.5	16745.4	49330	11548.9	18437.9	15057.3	15838	15178	17125.3	9929.57	22055.3	15111.4	17098.3	11703.5	13190.1	10036.1	22516	24838.6	29230.8	16999.1	22247.9	7497.32	7451.72	29673.1	38406.8	11602	17417.4	24132.4	46802.3	19178.6	30301.7	13170.2	25557.9	22955.1	17819.1	23122.6	25077.4
0.69_366.2643m/z	66771.1	67503.5	107842	56235	43892.7	69163.5	65236.3	37035.7	57177.3	63317.8	47394.3	48582.4	79702.4	48756.3	61645.1	52926.2	48778.3	43344.9	37610.5	49525.4	51243.6	64530.6	61548.9	46970.4	43906.4	46400.4	41347.1	32383.7	54725.6	62325.4	79001	48001	62352.9	47615.5	51335.9	65168.6	77614.8	37614.5	56928.1	81248.3	106768	44560.6	70348.3	79416.1	74180.9	60554.8	46836.3	80295	76778.6
0.70_1320.1842m/z	6112.04	2197.74	829.588	10834.7	6283.63	26336.7	17018.8	17766.5	59181.2	3596.45	25455.5	6332.44	20313.4	1771.95	4067.37	40764.3	198177	16500.6	296.285	141496	26299.8	19935	26064	3572.23	501.208	3508.4	14003	10.3963	5939.45	1739.85	3198.8	316.844	61961.5	53849.9	56170.7	18061.5	3708.18	22316	17652.9	2062.38	1772.2	2423.91	4020.45	14333.4	82431.8	109604	400342	117046	161211
0.70_274.1680n	91333.3	92789.4	76241.4	68058.7	77336.2	74236.4	78276	66620.3	79596.7	80392	100160	74739.4	72622.5	72089.9	77324.3	90496.9	82049.1	76933.6	66860.4	56379.1	55448.1	44586.4	52603.1	62424.8	51576	49599	40611.1	43786.7	40331.1	65145.9	84170.2	77582.6	91573	65491.1	78445.2	70811	82925.8	60560	72750.1	98762.1	98893.1	63687.1	77215.1	84908.7	84828.8	88475.7	68702.1	71471.6	55282.6
0.70_342.2637m/z	292278	198108	392698	199190	149291	251626	200990	258246	168406	300925	188339	154974	301082	384066	448374	190990	242234	144426	229452	216529	327789	428075	593358	174840	166416	197258	159914	89433.2	341893	295529	332974	129722	156860	155313	194970	459300	385049	184910	176227	472228	694638	225891	351767	298168	231881	267099	290023	503977	369252
0.71_201.0550m/z	2403.32	5348.5	2445.57	7145.61	14094.8	3246.31	1474.68	6745.88	1915.02	3942.54	11037.6	2559.97	1175.36	1436.9	852.357	3961.28	1134.97	814.331	239.221	27381.3	2170.52	980.413	6631.11	1306.19	1734.79	2239.26	1735.9	2485.64	3517.28	4001.35	2783.25	1544.46	3842.11	8571.2	5505.72	3178.42	2000.39	889.05	7002.36	1652.55	2973.75	369.833	1538.85	641.282	8131.76	2289.84	245.727	3209.45	2414.27
0.71_453.1685m/z	1.71396e+06	3.63132e+06	3.46947e+06	5.02493e+06	3.05426e+06	4.44455e+06	7.78172e+06	7.91096e+06	3.21629e+06	7.46504e+06	1.00917e+07	8.0226e+06	4.31024e+06	9.09402e+06	9.69747e+06	8.30232e+06	7.54557e+06	1.19544e+07	9.99687e+06	9.64388e+06	1.25006e+07	1.13636e+07	5.4158e+06	9.87435e+06	1.10487e+07	8.14196e+06	5.84086e+06	6.21316e+06	9.26049e+06	3.57459e+06	1.81409e+06	4.34443e+06	2.01979e+06	5.58332e+06	8.11555e+06	6.42221e+06	4.60541e+06	8.54503e+06	1.03078e+07	7.41527e+06	6.89133e+06	9.69719e+06	9.62451e+06	5.02031e+06	9.25614e+06	1.10932e+07	9.60419e+06	6.45207e+06	4.64175e+06
0.71_528.2741m/z	26234.6	44951.1	39446.1	62916.8	40127.2	57711.5	79300.6	86842.6	39201.2	66583.3	104434	85443.1	48701	96035.2	85907.7	96972.8	75713.9	109708	107934	99842.7	119166	140198	60547.8	101858	119202	93893.1	64693.8	74629.4	91030.5	59996.2	29280.2	61912.4	30738	70458.9	83193.8	66846.2	48078.4	79283.9	99742.1	85240.8	89709.3	92707.1	110891	51746.9	125854	99449.3	97615.7	73426.1	64051.9
0.72_144.0423n	5275.41	9466.7	9635.07	13732.8	9775.46	12758.9	27856.1	24555.2	7506.81	25159.5	38282.9	25154.2	13231	36981.5	42934.1	25794.4	25485.9	59210.2	50442.8	36690.7	55203.2	36671.6	12658.6	38296	45646.3	28299.8	17890.7	20566.1	24962	16559.5	7319.33	14608.7	6397.03	17352.6	25874.3	23533.2	12919.7	31991.8	38361.6	20570.7	24598.2	44562	44700.2	13019	33643.6	47453	37913.8	18625.7	13960.8
0.72_150.0681n	5406.51	12354.5	12179	17494.5	11807.4	19314.8	40212.2	35026.1	10120.8	43900.1	58809.7	37454.4	15573.4	56574.7	65442.2	36659.3	42331.9	92209.8	82787.6	57674.5	84891.6	56207.1	19818.1	58807.5	68507.3	40669.8	25734.8	27597.2	36146	13902.2	7516.7	17170.6	5409.23	18781.4	36710.2	33866.1	16178.4	53260.1	63282.9	31908	32233	64349.1	70410.5	23446.9	50272.5	81028.6	65218.1	27893.5	20367.7
0.72_414.2049n	3.75845e+06	7.39425e+06	7.34385e+06	9.16943e+06	5.9677e+06	9.75768e+06	1.61794e+07	1.52007e+07	6.29883e+06	1.52557e+07	1.8192e+07	1.3817e+07	8.48109e+06	1.75059e+07	1.94762e+07	1.44749e+07	1.38931e+07	2.39112e+07	2.1399e+07	1.71516e+07	2.22404e+07	1.75111e+07	7.77598e+06	1.86118e+07	2.00364e+07	1.50214e+07	1.02269e+07	1.10633e+07	1.35076e+07	6.81853e+06	4.43282e+06	9.38083e+06	4.10746e+06	1.03489e+07	1.51842e+07	1.34976e+07	8.75332e+06	1.63757e+07	2.09631e+07	1.25636e+07	1.36035e+07	1.81679e+07	2.08543e+07	9.46136e+06	1.57906e+07	2.04719e+07	1.81109e+07	1.09826e+07	8.84231e+06
0.72_503.3093m/z	96438.1	135947	146595	178251	127512	173370	217027	203243	129729	202274	234127	205434	156215	201574	229790	213794	196576	264686	273331	283034	283480	242654	144317	279114	279996	258704	183870	203968	155856	133887	114741	169043	104558	148613	206928	204366	153293	206935	266431	195595	203588	201064	244066	155656	203966	192284	275722	215658	162213
0.72_558.3238m/z	24414.9	28422	25617.5	30403.2	24538.4	24369.7	28633.1	27940.7	31606.7	33184.2	25336.8	31389.6	21517	20530.7	29812.6	30723.1	26033	35087.8	30277	31824.2	38638	29264.7	24137.5	36327.5	34269.5	32983.9	20810.3	26776.1	8927.12	24374	19780.7	20680.6	23199.1	24168.8	34182.6	22232	24228.2	24145.1	38996.7	27500.8	28490	22488.6	36008.6	25855.6	34806.2	23526.8	34671.4	36826.9	24630.2
0.73_116.0589m/z	759.197	2427.77	1053.67	673.604	809.999	1016.1	1364.91	2738.39	211.214	1600.1	3232.11	1608.62	935.982	5136.98	7496.67	3746.89	2752.46	8733.91	7870.52	2436.89	6083.7	2240.34	839.396	1051.58	3672.42	2588.68	2148.52	2997.48	3073.12	956.127	1071.21	1347.74	750.427	641.284	2633.29	1901.06	1268.59	2567.82	3036.46	477.37	3241.63	6896.07	8107.54	1750.22	3179.17	6387.32	3722.53	820.222	1335.8
0.73_225.1480m/z	42465.3	44556.5	32156.2	31691.5	43862	36322.2	35445.3	27227.3	36277.2	35437.9	30635.8	31164.5	42512.5	29372.8	26860.3	33822.2	27367.5	29954	24441.4	24463.3	26205.7	21849.9	24886.4	25693.1	22296	24935.5	20055.9	26595	19422.7	26033.5	40074.5	40671.5	36070	31654.6	34332.7	38425.5	40044.8	35443.4	34058.6	35783.7	34173.6	28224.3	29216.4	32083.2	29050.5	25256.7	27782	27633.9	31274.9
0.73_262.0740n	615.981	1360.02	429.928	1209.38	1001.84	217.83	117.083	241.314	154.371	164.232	243.574	616.421	1528.14	208.32	187.114	171.868	3029.28	909.442	170.686	86.281	355.383	325.223	167.702	158.741	338.295	332.147	223.197	193.006	621.708	316.25	276.257	531.988	297.832	160.433	420.4	66.8673	159.767	126.071	257.973	184.174	46.5859	2013.12	227.265	70300.7	2155.98	3526.54	126.599	78.7163	56.5444
0.73_386.2885m/z	60207.5	47774.4	77250.3	37910.2	42107.1	45136.7	36771.2	55803.1	48192.8	63750.5	32481.2	34717.5	56821.2	44287.2	53967.6	41980.2	44212	30585	31819.6	33399.1	54262.7	56841.7	83845.8	33029.7	30816.9	41465.5	32851.7	23164.8	45719	69300.1	75843.7	31460.9	50574.2	35622.6	37422.5	80571.8	53879.3	32809.7	32970.4	61863.9	92854.3	32171.6	41140.6	44509.6	49793.4	53823.3	36431.6	84395.8	65196.9
0.73_474.2856m/z	2.82492e+06	6.82127e+06	6.55374e+06	7.8216e+06	5.44481e+06	8.35076e+06	1.37814e+07	1.17049e+07	5.32653e+06	1.18565e+07	1.531e+07	1.1831e+07	7.20515e+06	1.38056e+07	1.56237e+07	1.25894e+07	1.23789e+07	2.08051e+07	1.99623e+07	1.70934e+07	2.07705e+07	1.6013e+07	7.54088e+06	1.82706e+07	1.98972e+07	1.55825e+07	1.02183e+07	1.13324e+07	1.20235e+07	6.5588e+06	3.82744e+06	8.64986e+06	3.19354e+06	8.32258e+06	1.20749e+07	1.08721e+07	7.52756e+06	1.32978e+07	1.65248e+07	1.08993e+07	1.08072e+07	1.47443e+07	1.80768e+07	8.48379e+06	1.39348e+07	1.79333e+07	1.74781e+07	1.11154e+07	8.63293e+06
0.74_311.1850m/z	143338	129374	118192	128045	193868	110294	97043.5	105129	130074	118854	112523	92258.4	119687	74871.9	78643.3	110918	82013.7	76412.6	80512.8	145054	106404	101046	113783	101931	93022.1	107053	72892	107145	79129.6	126757	136355	116211	150143	123849	107686	125712	132227	81566.4	131907	122277	108643	71164.3	97972.9	102471	106832	87743.2	101196	129910	118258
0.74_368.2794m/z	252636	170555	399789	156737	114688	272572	185684	182434	166587	255801	146518	111964	318191	311721	360869	161390	184632	147578	140938	171771	214975	394213	417460	175371	150697	164210	146583	82710.4	220755	261712	294449	124429	155948	175510	154553	312641	374568	138936	190303	400625	743637	165815	277020	274979	229068	217481	188627	386921	380301
0.76_344.2795m/z	196166	152449	327701	151517	104584	236678	112959	251852	147350	292363	183742	105058	228370	240828	270148	130807	158927	109630	136578	175590	270434	257393	453817	127690	120325	207164	88907.8	60391.9	186770	186003	250958	80164.7	133328	110700	191881	342654	255702	154424	121710	384599	569202	135377	218877	216898	205278	225312	176491	364544	268053
0.76_412.3056m/z	27340.7	20500.2	30145.7	22983.4	18324.5	20893.1	22856.5	21602.3	28496.1	31523.3	27067	21360	31896.2	17838.8	30921	21758.4	17199.5	10631.8	9057.62	15088.1	22867.9	12253.5	19936.4	17202.6	9879.38	15842.2	13165.5	11608.5	6389.13	22859	22748	15502.8	20994.3	18885.9	27007.9	40966.2	42538.7	30003.9	28118.5	38660.4	38017.8	15810.1	20548.5	21639.1	22784.5	16024.8	17797.1	33056.6	26092.8
0.78_428.2272n	122073	129161	126065	136491	133052	124654	129314	141096	110709	146406	153744	119888	120788	134336	144036	113364	108786	181584	150629	137609	214742	142342	100080	173941	181596	159264	97183.2	93513.4	130169	114882	117976	122090	113427	116092	144959	136514	122762	145736	184712	117378	117859	168414	168007	93282.7	125271	172061	162049	142589	120152
0.80_388.3044m/z	13933.4	10284.8	12692.3	9017.34	5683.28	5598.78	9323.53	5837.49	8950.89	10219.8	8992.6	5481.16	11902.3	9887.14	12951.3	7748.93	9019.88	5187.98	7918.33	3744.34	9386.89	5802.69	8043.45	3859.89	2726.51	6633.28	2144.52	2574.58	8534.92	10195.4	11401.6	6239.73	7452.67	6048.74	9925.79	16668.8	11647.8	9109.73	8610.71	13796.5	15513.3	9772.83	11926.1	7179.25	7264.58	10756.8	7960.73	13111.5	11373
0.81_237.1126m/z	12233.4	12162.1	8651.57	10272.8	12409.1	9990.96	13350.9	11473.3	11978.3	12162.8	12421.5	9913.38	12044.1	12539.5	10148.6	10880.4	11205.2	11945.4	8458.2	6776.22	8052.68	7027.15	6984.2	8869.08	7424.31	9186.59	9591.2	9759.04	10441	9360.28	10575.1	12966.3	12090	9850.8	11788.5	13690.7	13071.8	12684.4	12212.5	11168.4	11872.1	13421.5	12509.7	9138.53	10518.4	11998.3	7432.25	7154.4	7238.56
0.82_209.0954m/z	8337.09	9174.77	7381.43	7561.86	9173.69	9477.55	7148.42	7773.1	6498.44	7292.93	6331.39	8167.93	8703.39	6376.57	5907.89	6583.05	4815.7	8096.97	8787.97	5833.43	8709.6	8190.69	5494.1	8975.35	9263.53	9307.08	4083.09	6995.71	9927.7	9039.38	8171.36	7927.94	8162.1	6055.37	10221.6	9009.47	8436.5	7046.4	7549.1	7115.28	6339.65	9189.66	8569.87	5307.16	6869.6	8675.29	7014.04	9055.73	5307.35
0.82_370.2953m/z	301117	225704	407630	244454	198675	312142	255536	228721	186313	425666	233372	144880	388563	425494	512327	204707	261995	217753	277025	220340	373033	457609	585315	210588	189890	230052	158973	109255	404878	387292	333102	188927	171343	204755	248254	508785	388831	224050	244544	463644	1.01609e+06	293088	390947	260489	312950	413125	263789	514063	416346
0.82_438.3238m/z	3453.53	4339.27	3498.4	2920.65	4344.09	3709.6	6445.36	8242.83	3838.31	5512.28	3012.14	3113.59	3356.1	5373.77	6887.59	3821.83	4159.46	4294.82	4859.53	3752.41	2580.87	4916.83	1928.54	5143.61	2127.15	4038.46	2807.25	1422.84	3460.27	4584.44	4430.27	2294.69	4129.24	3887.78	4263.43	7479.7	5819.7	5138.94	4264.1	3888.53	5332.6	3593.1	4746.08	3956.22	3787.44	4396.08	3898.54	7595.98	5187.05
0.83_625.3169m/z	49699.1	56500.5	62619.5	58217.1	43297.5	54364.1	66442.3	55928.8	23387.3	66394.6	61784.3	51059.7	51405.1	48819.4	73572.5	63362.6	53369.9	76539.7	75706.8	68426	81989.4	62122.9	30149	77177.8	78652.5	73952.9	50996.1	50571.7	52422.7	45935	55869.9	58969.8	50648.6	45276.2	60164.4	59947.5	46693	66645.7	57404.8	46610.6	50329.5	57543.5	66799.8	38300.5	52772.7	68109.9	79331.2	59317.9	47823.8
0.83_709.3892m/z	96056.1	77895.8	102112	117344	65010.5	67545.4	83508.5	94367	78741.3	90891.4	65625.2	65802.1	56490.6	67919.8	71101.7	76830.3	84085.7	68885.3	84045.3	71102.5	73044.2	87243	73815.8	79215.8	86018.6	73620.3	97302.6	71805.1	58751.8	57150	112555	96805	80291.5	68959.5	74064.5	71669.7	68646.2	66120.5	64048.3	54837.9	79917.7	80997.4	75258	87751.6	89121.7	67960.7	76579.6	76923.7	78571.7
0.85_367.2325m/z	63849.2	70616.8	98200.5	73536.2	75542.2	75193.4	76459	75805.6	69797.1	82982.2	78477.8	70770.3	83698.5	72522.9	80256.4	75217.2	68278.4	71485.9	72781.7	57144.7	77031.1	77830.4	70532.5	68256.5	65342.3	72317.1	50625.3	56882.5	42904.7	66130.2	92327.7	70535.3	91179.6	66720.3	84219.8	85792.1	90680.6	68871.3	78829.3	89479.2	83947	60758.6	80073.2	74838.6	71966.4	60321.8	74542.4	92198.4	67561.3
0.88_253.1430m/z	11314.9	11504.4	6726.01	11110.5	11787.3	7166.26	12907.9	9240.11	9534.77	10653.9	9834.17	13290	7072.46	10170.4	9681.13	9763.33	9277.86	11634.1	10981.7	8740.05	9445.67	9080.62	8279	9826.98	10640.8	9233.79	8733.71	9344.1	7769.92	7727.6	9447.38	10709.9	12323.4	9021	11619.4	12146.6	12898.8	11305	11127.8	9036.36	7083.56	10916.7	12337.4	10113.6	9608.76	12798	11492.2	10509.2	8472.42
0.88_597.3030m/z	36911.1	38823.4	34975.4	39042.2	28088	43734.7	30051.8	31698.3	32222.5	30477.7	35985.6	28969.6	25398.6	28040.4	40431.1	30904.2	25268.2	36025.1	25365.4	39942.6	27222.7	27140.4	32704.5	25018.6	31352.5	35481.7	30684.8	29127.3	30940.5	27597.9	44167.1	36863.7	37209.6	29678.7	35784.1	32919.9	42393.3	39881.9	25508.3	48310.2	37267.8	28870.4	28129	31967.7	30433.3	26482.7	30700.2	38163.4	36445
0.90_298.3471m/z	501.975	446.025	184.843	86.6665	3923.38	5208.07	5644.55	145.77	3131.56	5287.05	2876.32	7529.31	13586.9	366.984	1310.75	797.462	951385	7729.51	210.556	464455	2673.17	29935.8	715.601	6105.65	841.877	16226.9	1.87463e+07	2.51951e+07	1.14579e+07	74577.6	1609.16	592.174	892.485	2761.78	1226.46	736.78	6159.14	8910.44	14585.4	49.3202	1902.15	59934.6	63782.2	86610	20109.6	8194.6	1228.1	11019.4	51061.3
0.90_422.3220m/z	81935.2	81588.6	85016.8	85298	69142.5	84193.6	90993.1	68431.6	72282.3	85767.6	76149.7	64958.9	84945.3	67693.4	90583.9	67729.3	70672.7	88516.8	60886.5	66923.3	76092.6	90051.7	69740.4	82077	77257.6	69068.7	78982.5	69023.3	75846	78018.7	78504.5	73508.7	86230.1	74411.4	83588.5	73251.5	101351	70990.7	78660.8	88062.5	101609	70090.3	78125.8	89241	90543	83467.9	61971.4	77712.4	88947.3
0.91_664.4628m/z	301924	203229	243429	165411	193251	116441	328436	195943	152051	483268	205221	57201.4	25508.5	98498.3	63194.6	50955.2	53186.5	36014.5	209650	122877	42053.1	33798.5	38580.6	39770.4	80064.8	22060.8	24487.7	15156	33918.6	29644.5	187277	111631	197847	119399	54959.5	117401	323641	125850	66533.8	100378	593742	181806	62128.6	65745.8	58111.8	80972.7	117914	179877	42127.5
0.92_372.3106m/z	104513	95109.3	130959	111557	88681.8	118569	127723	163521	114915	197831	148125	104853	110124	198143	205796	105022	148749	87502.3	137937	109658	117235	116094	193284	86973.7	85211.7	105888	56384.7	67537.2	113236	119262	122061	73510.6	109471	93277.6	195144	184231	158500	142694	107010	207599	254370	132851	155814	160767	169673	166207	94260.1	160002	117022
0.98_398.3260m/z	217956	190383	196338	245706	196199	191399	227179	180127	158716	262174	202058	190894	208564	278874	331086	174085	212557	184848	217407	165323	172776	188462	199675	139959	126217	117340	95916.1	152243	155499	171653	212933	170132	161490	176359	188440	305284	250404	182811	200644	248716	382942	215716	255363	229836	212205	225801	170860	227904	199173
1.00_804.9629m/z	9493.37	8592.13	3605.53	30700.8	21006.1	27320	52644.6	11928.5	16854.8	12439.9	17320.4	7868.23	14244.3	4026.45	11132	16957.5	14845.3	13803.2	21288.1	20508.7	15374.5	15832.3	10671.8	16574.3	21105.9	13616.9	95620.4	37101.9	46840.5	14068.2	25345.4	30653.5	46789.5	34853.6	17711.7	10475.2	27842	7457.16	3822.72	5454.38	10120.2	8502.03	2143.25	15178.5	12687	19800.5	73669.6	14508	42623.2
1.04_424.3427m/z	557206	456145	604242	432656	484940	536006	580989	637307	397895	840199	454048	366677	555509	723478	826901	459830	488238	691956	421902	512038	585935	785180	552655	595346	470166	339033	641595	375799	564810	536945	500831	520793	554651	694102	445538	694503	749920	561423	577797	670509	1.05489e+06	559962	533989	587013	696248	667831	382906	613060	707229
1.07_430.2982m/z	92378.9	91847.5	86669.1	92253.7	108352	65220.6	102172	90210.4	94469.2	87137.6	95624.8	122868	116499	134538	134060	134966	129485	111393	162553	103882	122747	101199	106208	122666	133140	143693	99681.7	65934.9	42917	102753	95060.8	80105.2	100595	80523	119512	133561	120156	78206.6	127512	108196	99325.6	86521.1	140459	136149	85507.6	80186.9	149346	143303	112427
1.09_320.2557m/z	75026.3	67354	54305.1	67111.6	62840.2	67584	60038.8	82318.7	51920.2	90529.8	68897.2	64561.4	170842	94142.5	134680	90712.1	129150	78939.4	133243	141782	159965	134812	238484	151947	180093	185865	145905	133042	180727	162716	60428.9	46544.1	55430.8	66074.5	63640.2	71783.3	113666	69909.1	100214	59989.4	125766	80134.5	131372	101633	83534.8	87551.1	92225.5	92252.4	163616
1.09_363.2192m/z	7146.79	4146.2	6763.83	15091.1	4208.94	8942	2445.13	3356.68	3869.51	3251.64	5185	4658.98	5583.11	2651.8	3669.54	6299.33	2794.84	6693.81	4203.52	3767.82	5812.55	5445.44	4521.71	5676.07	5010.4	3902.06	3042.33	3454.15	8166.9	5252.36	6834.33	15382.6	10135.9	2392.47	1487.06	4896.76	4264.74	4350.35	2774.39	2894.69	3397.46	1459.75	2629.74	3518.91	1786.87	6399.93	2912.85	14272.7	9383.03
1.11_396.2412m/z	1281.23	927.497	1929.75	1832.84	2190.11	2865.81	2130.14	2603.38	1002.19	1630.79	928.036	2181.24	1606.76	1995.43	1171.45	1881.18	1456.81	1756.07	1118.43	1631.38	1945.8	1457.42	1442.37	1816.92	1351.92	1423.15	1130.5	1170.92	2160.17	1487.58	6688.14	9451.34	12821.7	4991.13	5084.82	4414.82	5312.15	1932.41	2586.49	1879.04	3892.45	1743.16	1651.52	1746.03	2056.18	1034.57	2138.16	1859.63	797.225
1.14_738.4302m/z	135576	92420.4	128842	193159	124704	173633	121386	170978	130906	124316	101482	102523	103742	117297	111016	107535	101717	82351.3	110984	122348	112702	132227	115389	128377	99670.9	98207.2	157636	89517.5	122011	104190	146354	140119	176778	157574	127903	141574	128534	114562	92924.8	104173	116978	127116	103558	126343	132455	95729	130353	99076.9	164358
1.16_694.4016m/z	226575	210221	264429	283684	217920	252817	219614	253274	269797	206347	225013	214708	204633	238389	214334	216763	204730	186800	209160	199198	209913	209398	200417	227247	188331	153896	259631	180753	213357	175945	245710	200355	272798	261143	220707	238656	242217	226040	218659	216846	225387	244125	231856	239923	236636	202037	241115	209161	242850
1.17_496.6937m/z	32717.4	25716.8	4798.41	6927.75	38320.9	46041.8	12560.9	28329.2	24169.6	11545.4	15923.2	25853.4	20554.1	24324.2	22476.7	17870	25326.5	25265	27977.1	9624.04	14651.3	31356.8	31415.9	25021.5	29862.3	28576.1	25089.4	12219.3	10063.4	15880.7	26444.2	10263.1	24005.1	27869.5	38617.2	4776.35	31274.9	3.1983	28857.8	49275	13605.6	10051.2	844.528	11775.7	27301.1	26506.9	25809.2	19378.6	32478.5
1.19_330.3367m/z	6370.96	1242.81	808.32	1081.25	1506.26	1827.31	6920.38	2028.37	1217.09	5368.18	2992.53	5991.78	851.064	6172.32	4717.96	2675.55	7946.26	2689.84	4938.47	5589.44	187.624	4684.12	4407.22	3319.32	1376.63	529.677	4647.98	6260.75	277629	2383.28	2412.99	1165.99	2815.95	1723.55	371.807	872.791	462.757	4635.26	960.507	2608.26	5616.55	32345.3	3010.91	8108.7	4425.15	56252.7	734.803	1363.84	3055.16
1.20_400.3427m/z	439227	478653	524683	479306	446741	413853	377627	497058	358511	633982	598184	398812	408568	576049	668389	415773	466426	406719	496807	408909	478641	395042	561194	366456	429054	478580	275796	336672	497772	525703	489798	407380	369109	419478	420540	594023	448877	614501	436047	509423	737056	592392	438885	425663	617633	385191	445014	551666	475127
1.20_528.4103m/z	118046	87805.4	84424.3	73770.1	85502.4	95785.2	110145	85407.1	85498.3	91405	85916	102992	96126.7	108923	92959.4	91189.4	92211.7	102742	113070	122218	94919.1	81539.3	94824.7	108342	96576.3	118435	93631.5	95318.3	94616.1	84133	100880	83637.9	96532.1	102972	92404.5	83995.9	117190	84698.4	112987	119997	107669	98279.5	100863	94430.6	100906	104284	98650.1	97499.4	101815
1.23_476.3721m/z	9342.35	8148.58	9953.68	4420.49	9532.98	6167.3	12624.3	8036.6	5922.51	6894.52	7439.28	9367.11	7695.54	12710.5	14143.5	12512.8	4661.72	10221.2	9531.45	6959.35	10605.3	8783.97	8070.79	10905.2	7487.26	5569.07	9225.67	2748.57	6908.67	8703.34	9136.31	8289.32	11521.5	6523.44	12875.8	9862.9	12238.5	7735.83	6053.74	9991.73	9714.29	10986.4	5713.85	10203	5607.05	10729	3250.69	5723.82	9081.3
1.25_169.0857m/z	12032.1	21157.4	10212.5	4293.36	6695.46	7496.04	21180.3	2392.01	14906	9024.53	8945.65	13705.4	21305.9	17376.5	21201.8	27014.3	26128.3	18713.8	51271.3	17723.8	13967.9	59393.5	15816.8	16428.9	25531.5	18817.1	20544.6	16378.1	11833	7068.8	10674.5	11424.3	19758.6	13796.2	19029.4	13487.8	16000.3	6250.58	14831.1	21508.3	17704.1	17389.7	25839	12504.6	11515.5	15813.5	20819.8	46959.8	18404.8
1.25_485.5072m/z	18733.7	100237	25066.4	10117.7	28593.4	27294.2	67305	14147.8	90698.9	50182.4	49305.9	128833	47221.2	53108.6	41278.3	22798.5	45846.9	33316	47884.5	64643.1	89505.9	29972.1	159455	85732.6	195413	143460	129666	188521	60019.4	10141.9	37114.1	76356.2	42247.2	48467.5	54152	61833.8	42148.2	27120	106446	61860.5	48639.1	63874.9	32487.3	67863	89937.7	49514.8	83760	18572.7	117729
1.25_485.6394m/z	16283.7	24625.9	12858.9	12402.6	2622.98	3062.05	11354.3	10285.4	8522.92	3429.48	10314.6	28248	11932.6	7150.19	7189.16	4707.21	6754.57	5860.91	11797.3	13544.6	16389.8	16671.2	29383.8	11269	50296.2	5425.73	17852.3	37199.1	20577.4	25146.7	12492.9	30504.2	6775.74	8669.99	9797.19	13529.2	7951.42	2094.84	5888.53	8070.14	5132.24	11964.2	7852.21	18298.1	8513.27	7875.32	11162	798.054	19774.3
1.25_485.6878m/z	31843.9	67298.2	19339.6	18305.3	6953.09	4239.23	18612.7	16242.7	40209.3	8545.34	8819.66	79400.7	22546.7	28802.8	887.601	10680.5	25873.4	14023.7	31846.7	70230.4	60397.9	58560.5	54255.2	29000.2	48035.9	31270.1	41532.3	85627.4	10064.2	65431.3	30082.8	49987.5	7395.16	16893.9	8861.49	17250.6	12396.9	5703.21	60206.4	21830.6	2321.43	9839.78	15361.3	28562.7	26783	36297	31919.5	378.813	39024.8
1.26_510.2870m/z	35732.9	43980.7	30682	37468.4	40844.5	28036	94901.5	20317.8	52470.5	55340.7	50241.5	50522.3	90921.3	100205	106873	169948	136273	60318.8	189581	89668.1	41674	196102	65991.5	69844.5	63900.6	85901.9	89626.9	88911.8	48650.1	34061.6	54758	62478.6	72123.3	94256.3	60520.2	73404.1	78296.8	25410	66257	125020	81485.3	87589.3	98980.3	103903	69005.7	107981	72140.6	125897	58443.4
1.27_356.3524m/z	14382.3	4474.99	829.781	208.272	2705.16	3463.23	18359.9	3791.32	6222.01	11765.1	8355.15	31563.5	1885.99	54307	30657.5	11607.7	22637.8	4982.8	17071.4	8049.14	2557.74	4089.6	7227.62	6637.36	5931.01	4358.91	11853.4	9198.17	151409	5853.26	2380.39	2090.53	4841.73	4587.37	5076.2	305.658	3486.14	25103.7	5369.31	14259.9	16162.5	55644.7	4418.52	26171.7	20150.4	92003.4	906.724	434.99	1380.47
1.27_426.3577m/z	697781	570176	641917	547045	690323	536458	594792	561230	432656	953198	563935	466551	768364	868364	991919	516785	663294	675285	630183	516500	749278	687508	845897	503221	494736	481708	497655	348598	740320	746044	694765	591962	546597	540308	507613	1.18435e+06	724515	605635	608633	767510	1.34102e+06	723942	664121	596414	645460	720062	600908	701909	771604
1.27_543.3436m/z	341225	403341	209910	64615.4	248796	243344	615602	190541	377630	191159	182186	404938	611949	739420	658426	696388	783684	419420	1.1388e+06	423717	306785	994350	546686	451430	557312	452804	486839	358231	297598	180372	336704	388294	484757	386270	429875	347478	518938	117314	421645	500439	463742	328798	560308	460973	241759	545980	696897	739827	540368
1.27_618.4006m/z	48194.6	48580	37828.2	16337.2	41151.5	36496.8	70695.6	27186.8	42991.4	31272	35667.2	48781	57912.7	70613.1	67070.4	66667.9	78031.3	49025	92131.3	44382.6	35628.3	78513	52706.3	44596.2	58289.7	49502.7	46801.9	43040.9	39319.4	22003.5	47366	53737.5	55877.1	39271.8	50929.3	46535.6	56706.7	25292.9	48086	59109.3	44655.3	39766.2	54884.4	51758.5	27523.5	57371	62730.1	68414	50871.6
1.29_228.2317m/z	7886.23	7889.91	5426.14	6367.88	7604.79	8668.62	6973.64	6063.63	6629.26	9012.88	5953.15	7413.65	16084.3	17062.7	22695.3	8356.26	10676.3	9255.47	11500.3	11833.4	11983.2	11001.5	27729	13453.4	11597.7	12403.8	15057.8	15225.8	14831.4	18346.2	4991.85	5209.07	6768.44	5942	4779.51	6095.89	13378.7	6567.96	9921.74	6499.38	11669.8	8989.82	35842.6	12849	10695.3	6509.09	9290.21	4398.08	17272.6
1.29_326.3051m/z	15140.2	37075.2	9974.27	8803.74	6941.44	17711.7	37316.2	4944.76	22119.1	13895.5	18629.6	15918.8	13358	24231	36417.2	13511.8	15818.2	5609.87	25549.4	13737.8	20104.6	30618.8	19193	10665.7	16936.6	23614.1	10689.1	19493.6	16590.9	13635.7	7581.87	7833.38	24349.2	14792.1	42678.8	6998.53	29727.3	19776.2	8963.19	15382.1	16893.8	12915.4	21934.9	26668.8	12947.6	19516.1	6732.09	5917.48	17933.9
1.30_508.1885m/z	3294.33	520.824	2628.32	2712.7	1334.13	2321.02	2999.9	3212.34	1704.28	3099.86	923.37	2881.63	2976.92	4271.76	4930.87	4711.21	3523.95	4848.02	2534.02	761.115	364.955	216.41	221.472	388.899	349.125	409.053	508.033	365.508	460.918	363.156	3365.38	1955.45	3770.17	1388.87	6215.05	6052.91	4001.51	3955.11	1755.41	2816.65	5044.95	3542.39	2680.23	4977.24	2603.5	5089.42	2483.37	626.954	851.76
1.33_468.3898m/z	286673	247857	263273	339576	279272	273301	322585	310984	289174	301420	300276	383336	271238	318523	338939	297177	359515	355372	351249	337328	294326	294658	297991	301112	294717	331330	284174	306208	380715	352317	266235	276605	327723	246661	284974	284237	278696	264423	284830	293043	288253	318524	313868	484023	323569	419232	302960	303232	269181
1.34_278.2474m/z	13381	32564.2	12543.9	18215.6	9401.5	30718.4	42414.6	10941.1	24241.1	25658.8	18797.5	9591.14	56603.4	30778.6	61089.8	20927.1	28879.8	21639.9	49148.1	43805.9	46683.3	57294.7	66178.9	40831.7	35684.3	51875	35197.3	65023.7	62237.1	50227.4	9679.14	7373.19	23230.4	21858.5	30551	17688.3	36980.3	24032.7	13710.9	18642.5	39696.9	22315.9	67776.2	36215.8	16649.6	26986.6	18097.2	17726.5	52125.2
1.34_399.3907m/z	12126.9	13465.2	5754.04	7713.71	3916.24	10436.3	31498.1	4457.42	22191.2	16700.2	20561.1	5635.97	14372.2	8133.19	20280.3	7072.18	11946.5	4907.87	23864.6	7258.78	9161.95	10350.6	6875.95	5857.1	6547.34	11852.4	3684.09	9359.01	11544	8060.91	4533.67	2707.77	21204.8	13487.3	39328.8	16242.9	20317.5	16527	7846.64	10034.6	12447.6	9672.5	21559.7	20875.6	12051	13937.5	4322.99	8618.3	10367.3
1.36_398.3654m/z	43736.3	36938.5	19258.9	32248.6	13198.6	33331.5	49452.6	17999.6	65573.7	86690.9	46253.7	33012.5	31349.8	26372.8	44315.2	19701.1	44060	20589.6	42984.5	18574	22055.5	26758.4	19117.9	17050.9	19709.8	30515.2	13292.9	25556	25430.7	22156.8	18397.1	14078.5	49423.4	31592.2	139186	42185.1	46637.4	51962.4	24372	32244.6	32052.9	25895.3	42947.6	39390	81853.9	32501.8	14259.4	21527.1	25529.6
1.41_1318.6556m/z	5557.43	3437.8	177.47	2258.89	212.466	848.919	968.969	503.68	743.105	1998.03	7.61355	198.419	538.236	487.536	520.07	225.858	64.7313	489.324	146.46	374.073	302.152	297.09	214.861	263.348	194.286	152.5	124.347	8.34686	238.625	219.854	2427.31	2620.59	1267.11	463.034	852.892	3570.53	359.029	452.421	399.821	298.198	223.274	1976.5	557.635	576.61	274.721	127.34	330.713	315.531	356.517
1.41_309.2786m/z	6497.06	11300.1	4363.73	7774.92	5513.69	7207.29	8057.54	3230.15	9626.65	8916.65	9975.69	7792.08	5975.34	8143.72	7473.24	8457.69	8624.94	3556.92	3488.61	5391.47	2838.42	5734.71	4340.57	4206.26	3258.16	4924.47	3826.27	6565.8	4989.79	5571.3	5874.4	5299.39	11929.2	2564.95	37904.8	5050.63	7177.45	8103.36	3962.4	6228.08	12229.5	4973.35	5414.88	5872.5	7370.63	7055.18	2187.43	2304.42	3903.38
1.41_704.4514m/z	9304.03	4118.44	5727.79	12112.4	13463.1	10363.5	8378.1	12791.4	6842.69	4692.97	6365.35	5851.78	6276.09	10721.3	7185.28	8467.56	4112.65	3185.56	14445.1	4936.72	2525.46	1249.87	1735.55	1698.01	2585.73	1922.6	2709	2209.84	1887.97	1581.34	6790.34	6910.39	12347.3	8385.07	10233.9	9515.3	10681	4811.67	2251.42	7575.82	7879.7	9576.98	7799.08	8501.82	10658.1	9499.63	9098.37	5968.32	6681.25
1.44_1032.5821m/z	166854	147840	144921	216431	110492	113508	139909	134031	125320	100828	93997.4	101513	122007	163701	130733	109879	133313	101150	125729	132675	138166	142155	125195	87496.8	102502	107602	250526	108544	130376	110010	194149	203411	137923	181261	114141	136866	116120	131191	128923	137927	127404	167422	97386	94807.6	138906	119582	150813	112868	203976
1.46_528.4112m/z	310308	254221	238012	262667	271885	305695	287953	257601	272902	271975	266469	289035	270912	329857	311579	329248	316014	295935	383325	285660	261964	367452	334585	299747	298809	287691	285821	270652	246153	219219	265003	292498	311136	240125	271711	229415	259800	277052	267557	318349	306805	255501	312040	291391	282192	295470	354358	333774	294617
1.47_1004.4971m/z	206022	129732	194888	280183	194195	183971	140320	240710	195582	202157	182911	161102	212876	252026	206536	208707	180873	111277	164405	210024	214955	169762	188250	297105	202378	153077	235488	118883	178017	158673	263203	267678	218039	211686	183907	180355	192247	252475	163951	180145	211102	238893	183401	167328	222287	148377	224830	143598	281826
1.50_416.2950m/z	67023	62517.8	64930.9	86200.9	80502.7	75311.3	71416.2	69210.4	70370.7	65014.3	74008.4	77190.7	65961.9	69449.2	77673.3	71026.9	76382.5	82783.8	75565.6	62924.8	69010.2	68342.1	59258.6	63166.8	59080.2	61710.3	69994.8	66572.9	69576.7	63467	76605.3	72900.1	77947.4	65391.2	82676.3	75097.8	69543.1	68799.9	80386.1	76357.6	72026	84332.1	81426.5	67165.1	76059.7	82813	68870.8	76519.7	73813.3
1.50_960.4707m/z	196361	145356	290612	331588	250398	253111	246241	319747	252935	235685	175114	153408	189872	275608	193596	222927	246246	151991	208520	211855	257669	207700	220321	238268	213366	168843	362164	173886	250872	244187	300344	275690	325877	313226	255232	271207	240770	217860	196327	159435	214319	260186	212427	231068	251069	164177	265293	190890	324373
1.53_916.4444m/z	243424	143394	243684	358732	216418	259705	213266	279827	240672	211513	191924	170138	219526	243484	212440	234005	231402	187594	194133	223643	260394	243814	229639	253386	240841	200206	369672	181373	248858	185917	266966	215797	291770	321255	195422	254628	239399	226907	179545	188903	214240	232034	198859	224280	238816	185563	272491	218137	344489
1.54_856.4764m/z	354922	279209	321444	491054	336318	375144	335211	437108	337034	324839	285036	244155	305124	397660	279818	279864	330571	220863	275875	289320	327089	326935	385754	433658	404604	311998	569021	317123	401956	346246	475777	377891	426641	489272	307552	361185	339410	297469	267182	249770	345480	346943	279026	277710	366940	265569	357316	236753	483761
1.57_812.4502m/z	387872	263647	385026	429072	297727	382065	318392	435994	323589	304011	261436	255458	292818	344660	261485	299000	301595	218669	294582	307616	364320	299209	328142	397290	303044	266475	474394	258751	347684	287932	460135	421253	414746	461785	272634	353040	311315	281806	222026	245503	330087	334501	289936	279635	389794	277771	341611	242424	391791
1.61_768.4236m/z	303866	232976	340989	366983	310796	344292	307807	323847	286748	240671	243885	227001	247036	293081	286346	256344	293090	222370	249715	278248	320848	298291	315040	327389	277775	234677	404792	239719	296041	266644	377580	351055	356891	341430	291784	334412	323418	253389	225568	234509	274440	288461	260365	262676	287479	259360	343447	246472	392637
1.62_413.4081m/z	5463.51	14805.4	6068.04	5852.13	3844.58	12874.5	22166.1	5101.13	16265.2	10557.7	15747.5	4336.47	10728	10900.7	22404.2	7560.59	7210.35	3571.94	15815.9	6775.66	9200.37	11149.7	6831.23	8769.77	7341.41	10720.4	2512.02	13016.9	9759.62	10608.7	5793.86	3552.56	13900.2	10674.4	24575.9	9536.46	21428.6	11912.2	7882.92	10488	9140.5	7507.86	20374.9	13437.4	5181.91	10881.7	2589.58	4329.78	11541.1
1.72_311.2993m/z	32415.1	5865.1	5761.16	12593.4	16573.8	40864.6	14793.8	151800	51323.4	29201.7	14187.6	26027.1	6445.11	8062.7	8879.64	16627.3	32677.3	13696.4	18348.1	4638.66	9531.8	5396.36	7486.43	4007.1	5918.66	37072.2	39520.4	11949.8	16821.6	4960.75	24069.6	16743.4	13891.6	45644.7	141814	38279.9	37243.3	10324.1	17059.5	18984.8	11961.2	25390.9	4282.11	23946	34559.2	24529.7	21242.3	10774	26114.3
1.76_592.3242m/z	66030.6	58871.1	65818.7	77159.1	68797.6	67853.7	65452.5	70178.4	63387.3	60472.1	52065.8	65124	66542.1	62426.1	51788.7	53251.4	59122.3	65766.2	61143.4	50305.1	64650.3	64184.7	63365.2	65405.4	67075.5	52495.9	66363.3	54087.4	59498.7	60720.3	73121.9	81779.6	72025.5	73883.1	68891.7	61786.5	55353.7	63836	58479.3	64874.4	60424.8	63643.8	63017.6	66623.2	65365.1	59278.3	70711.4	52636	66253
1.78_255.2100m/z	24356.5	34829.7	19581.4	15720.5	23311.7	18537.4	16284.5	18208.3	26202.6	15113.8	18177.3	11835.6	11554.1	13952.8	15123	22868.4	11781.6	15181.1	16444.2	15073.5	15605.5	15768.9	11405.2	17340.6	18782.6	20998.5	12473.9	17677.9	14625.2	12994	22453.4	29266.2	23705.6	21963.8	17357.9	18640.5	18688.1	27757.3	24044.4	20829.8	16037.1	26096.1	16751	13605.1	19120.9	20209	24426.1	15193.3	16087.9
1.79_268.2186n	113037	122000	107751	94256.1	91295.1	86512.4	94602.6	105528	105983	82282.8	134730	85890.1	114318	68171.5	85819.7	116988	65453.2	86316.3	96788	91450.6	86037.6	89768.4	60019	101558	112942	85811.5	86053.1	112997	106061	95602.8	103448	101614	100360	108833	81346.5	89303.6	95563	161567	128019	137939	104881	137909	109467	100629	130268	118867	120964	115240	113960
1.84_856.4676m/z	33652.8	42543.4	109052	94272.9	64235.3	60638.3	56420.6	79961.9	40752.2	50337.1	56468.1	50073.4	67024.2	80472.3	74281.9	50337.5	63244.8	37039.9	58511.3	61984.7	39922.6	58607.6	39032.4	51971.2	90893.2	68662.7	89370.8	45156.8	73433.2	54479.6	78922	68605.5	96775.7	103599	57739.8	62827.9	34368.4	66318.9	45911.3	44494.6	66603.5	93901.7	67521.8	45273.2	63085.2	63764.7	58486.8	16608.6	84762.8
1.89_650.3740m/z	46255.1	26330.5	40857.3	47851.1	46287.5	51444.3	50369.2	62455.2	54637.8	42828.9	38320	36151.4	36756.7	49828.9	35440.9	41560.3	35021.4	36177.9	40364.3	26460.9	17006.6	20174.1	15473.1	20857	21365.5	17966.1	21512.8	19723.9	17270.8	15506	39374.8	45713.3	59189.4	53210.9	50331.9	48688.1	56676	41079.1	39061.2	42261.2	37363.7	40470.7	47420.1	39609	42982.5	34273.3	37326.4	22969	37330.1
1.94_694.4647m/z	2483.23	2489.63	2771.2	1802.84	4303.6	3254.53	4291.93	2141.86	2754.25	2777.01	3744.4	3120.61	2852.34	1976.13	2697.02	3200.71	1990.54	3376.71	3601.16	1734.09	522.176	570.245	607.602	1007.52	844.212	805.189	488.434	589.865	551.305	648.277	1928.36	2628.18	5471.9	839.611	4619.11	3108.94	3785.85	4052.26	3482.51	3978.68	3078.36	2521.6	3477.72	2109.83	2040.38	3160	2868.53	1246.24	1914.05
1.96_390.3344n	92240.4	79627.9	84706.5	94089.2	93635.3	89626.9	95128.1	83079.5	87519.2	91965.6	89042.6	117031	77187.5	99656.3	103380	95976.3	100298	114553	111540	101395	101166	96686.7	91087.4	94742.3	90894.8	105510	82396	91136.6	109311	105715	86668.8	84444.9	94540.6	69304.2	87492.1	90874.9	92014.1	77920.7	92270	94438.9	95108	91202.1	94329	126573	97831.5	104265	98211.7	95135.5	85324.8
1.99_584.8307m/z	35337.4	29747.9	41449.9	53635.9	38091.4	37759.3	36925.8	38070.8	33535.8	37199	38111	39996.3	30515.1	35799.3	34298.9	38479.7	46429.6	20781.1	34320.9	40912.4	30059.6	49503.8	38501.1	40910.2	31102.2	33329.7	57958.6	40350.7	29285.7	34218.1	46341.8	49541.2	56651.1	54401.2	37633.6	33592.2	36740.5	16893.4	34244.5	35092.4	36016.8	48624.7	39853.2	31159.5	39423.4	30099.1	47294.8	24484.7	52493.6
10.00_1121.7887m/z	157907	184513	134790	150052	93833.3	96135.7	128938	96934.8	161959	136924	133018	102983	159152	115540	100888	120296	131153	170177	97087.1	108845	129442	123522	103083	128963	113294	91046	139598	208990	110798	155245	170053	357964	102311	108595	137379	113035	135097	158495	152815	128858	114079	119570	120723	130898	102542	134619	94599.1	142578	125773
10.01_950.7377n	78110.5	93320.3	69693.8	131623	78540.1	62159.5	56430.6	64240.3	72924.2	45064.6	86087.7	51536	80837.2	68469.1	78201.7	68686.2	84714.6	62195.3	71755.6	66333.4	90743.2	55192.8	64529.1	72732.2	117306	81573.9	59827.5	95069.8	92749.4	69175.7	129169	256771	56809.3	48855.9	74568.6	80688.4	64192.3	148597	130086	67643	61817.4	106109	86522.5	65611.6	59748.3	64850.3	89079.9	117321	72932.2
10.02_662.5588n	654191	642594	567458	694333	633463	650878	595263	626340	648313	579421	666974	621025	666239	637858	707879	699102	679864	623146	737883	573425	659309	639136	680204	671486	570981	662787	598733	666472	635916	661913	650949	591324	699279	543662	561083	786079	665674	615382	579218	721076	646717	592690	655701	718405	676490	662799	772236	699588	639835
10.09_623.5057m/z	133425	169505	156971	183300	112449	104829	162137	121788	111355	153790	123281	94582	115644	126323	98700	108400	115186	157711	102158	147366	102992	108935	75958.7	103596	155694	88025.4	197110	165524	114320	115204	135965	251367	88652.1	210722	237341	108348	115634	213830	186001	115742	77538.1	179771	142614	126458	119394	94649.9	113028	116798	125936
10.09_941.7008m/z	831057	869742	821341	735248	595056	613054	829303	815128	714283	856207	712174	768000	888402	745643	782630	748576	847911	1.18893e+06	622365	974866	709586	696788	632667	730511	742536	794310	991260	1.01464e+06	634934	692893	822930	1.29413e+06	566053	794649	945154	643711	848668	966078	1.02429e+06	687745	567344	907768	947765	914925	766554	737862	630255	834566	845305
10.10_1097.7819m/z	400706	417072	417916	426960	355088	363733	467415	287915	359165	422419	371579	289429	402268	382665	317758	343770	389772	525699	308239	325180	345693	412524	355479	345755	414903	292376	553181	560181	357444	431186	395464	663260	341599	466108	484234	328224	421228	393386	445964	375694	328867	381846	448534	404065	384363	386909	278519	382941	334630
10.10_1119.7599m/z	68392.8	59837.8	64513.3	53360.6	41223	51431.2	67826.2	41630.7	46135.9	63137.3	43401.2	35211.1	51283.4	57917.6	43179.6	47420.4	35802.1	79674	52493.3	41366.7	42788.6	40259.5	39222.1	47423.3	44795.4	32289.4	63503.2	60932.7	59784.8	45196.8	67311.9	90726	43196.3	52600.2	54191.9	50837.8	65131.4	53930.7	60682.6	54462	48968.8	46714.4	46330.2	48579.6	48123.4	42772.9	35230.8	56368.6	48976.6
10.10_902.7363n	1.14819e+07	1.5059e+07	1.50637e+07	1.44234e+07	8.0662e+06	8.27479e+06	1.69751e+07	7.64891e+06	9.58698e+06	1.79783e+07	9.92642e+06	6.40333e+06	1.34368e+07	8.83799e+06	8.35013e+06	9.55439e+06	1.07811e+07	1.92184e+07	7.71862e+06	1.09206e+07	8.79595e+06	9.80092e+06	7.53271e+06	9.69924e+06	1.43013e+07	5.89324e+06	2.34713e+07	1.83164e+07	9.93492e+06	1.10931e+07	1.10409e+07	2.4472e+07	6.75592e+06	1.8366e+07	2.06558e+07	8.25958e+06	1.03999e+07	1.73263e+07	1.92198e+07	1.02944e+07	6.47962e+06	1.71399e+07	1.37372e+07	1.19187e+07	1.1201e+07	8.92644e+06	8.44468e+06	9.50301e+06	1.21712e+07
10.10_948.7964m/z	704158	866698	812884	797280	548518	517716	895002	485320	615823	960123	670246	424049	883839	684139	623198	624815	738701	1.13622e+06	507068	520309	601352	644266	541344	640268	770635	356283	1.18516e+06	1.04973e+06	620952	669739	721455	1.37338e+06	460960	906318	1.12262e+06	570177	725592	1.02046e+06	1.14739e+06	678468	454119	1.01828e+06	878397	805367	699532	606839	565887	696155	781723
10.10_979.8205n	1.90602e+06	2.21104e+06	2.33348e+06	2.05004e+06	1.33352e+06	1.41297e+06	2.38358e+06	1.11056e+06	1.51893e+06	2.39378e+06	1.54345e+06	964821	2.23435e+06	1.59771e+06	1.59588e+06	1.60012e+06	1.90366e+06	3.01962e+06	1.3582e+06	1.33363e+06	1.60791e+06	1.61559e+06	1.38045e+06	1.63649e+06	1.87202e+06	890871	3.09555e+06	2.83663e+06	1.54212e+06	1.75757e+06	1.8597e+06	3.75449e+06	1.15832e+06	2.31998e+06	2.4757e+06	1.48955e+06	1.8786e+06	2.11392e+06	2.39753e+06	1.67297e+06	1.14259e+06	2.18468e+06	2.28328e+06	2.08474e+06	1.74555e+06	1.56039e+06	1.39959e+06	1.80182e+06	1.98649e+06
10.11_705.6935n	57351.7	48607.6	39196.7	66355	50750	56042.7	37081.5	38703.4	57466.4	49391	72282.3	58398.4	62365	62599.7	68055.7	69940.2	84079.3	54683.5	58253.4	48297.1	58839.4	56359.3	85831.9	72416.5	64504.5	68067.3	61575.1	94177.2	72369.6	70855.8	56361.9	45493.7	73549.9	43654.6	35471.1	67457.1	70871.6	43315.5	47163.5	76212	84630.5	50493.5	55135.1	79200.5	60090.7	74311.7	43367.3	58848.3	54827.7
10.13_1012.8384m/z	198174	224896	194045	242016	164880	152763	190931	161617	195876	184806	213854	147410	210717	189522	163882	193748	217190	217882	179414	171483	171112	153200	166762	164557	194988	163566	211369	236853	191028	198119	221698	386541	158251	202750	222256	182719	180568	251079	209114	202788	191089	207952	204151	215147	165189	171774	176887	230853	184506
10.13_949.7263m/z	66171	65247.1	42419	168414	103243	41305.3	44550.1	37358.7	51581.6	28645.1	100723	43125.1	43544.9	65707.7	46307.4	61062.1	71122.1	50848.9	72165.3	51978.8	76133.6	27961.8	49015.1	29780.2	74945	58432.6	22731.3	49992.6	47751.3	51089	104805	129256	38576.1	33329.3	84979.4	62954.3	37079	222643	107611	37808.5	33410.8	111095	58962.4	65232	47520.9	47722.4	63555.4	101752	35945.5
10.13_952.7544n	880678	994452	789862	1.23791e+06	625739	530344	637200	833621	726841	669832	950844	739309	802236	726484	674102	732143	835841	825510	735354	904898	809613	529856	683411	570045	1.08596e+06	903198	671851	1.20387e+06	653672	759847	1.14452e+06	2.27382e+06	572237	696130	937625	826447	611961	1.45854e+06	1.01228e+06	613799	495372	819147	908528	819361	598742	599433	731507	1.12787e+06	618016
10.14_986.8203m/z	98360.8	110751	86722.2	133806	114251	68643.5	102154	76706.8	88440.4	90617.7	120867	77318.9	97363.7	92844.8	76854.8	98475.1	98670.5	97791.5	110950	99145.9	108909	79412	72193.7	74055.9	126186	86385	67031.1	105060	104954	93533.8	131577	168984	85990.8	106413	118624	107880	80398.6	192101	157318	93146.8	81798.5	139406	94803.4	102086	80268.4	76704	110613	102682	103943
10.15_1122.8871m/z	101561	55368.1	77834.9	89423.2	57851.4	92514.2	56252.1	57092.1	88391.8	63406.3	68735.8	71172.7	83722.6	75421.8	88193.7	94455.6	63755.2	90164.6	67075.7	71624.5	142916	182467	64911.8	88600	114880	71449.2	97441	110212	100236	91589.6	89195.5	195319	81112.1	83904	78792.5	81470.8	79166.2	67150.7	65317.6	83222.6	69896.8	69136	85292.6	77507	80882.3	104454	71838.3	103964	74371.7
10.15_621.4982m/z	216245	225250	205351	253532	222428	188597	222648	186120	207996	226104	221141	216736	209309	213897	187758	209146	207356	216900	195138	226490	194634	200203	181156	194334	261429	218141	219432	224562	210672	198537	215015	261360	204786	216231	299851	197565	202646	303923	271554	203251	195122	248395	214882	205688	215075	191730	222576	209200	206292
10.16_962.7213m/z	352465	270116	226608	231676	276998	233859	231728	218760	275019	274079	230675	227737	241827	235346	261944	227152	267406	224885	225608	219929	227633	217589	225244	242752	223005	243131	234820	240041	230148	245418	257462	339482	226234	218398	244595	242229	236605	285624	387925	234893	247360	331204	240026	247828	232237	238525	227803	255505	248810
10.17_573.4883m/z	2.0692e+06	2.50452e+06	2.29129e+06	2.99487e+06	1.85239e+06	1.13994e+06	3.08986e+06	1.16435e+06	1.32056e+06	4.67106e+06	1.70205e+06	1.41166e+06	1.81002e+06	1.54755e+06	1.07304e+06	1.29194e+06	1.50565e+06	2.06587e+06	1.49521e+06	2.77382e+06	1.14749e+06	2.15973e+06	1.06921e+06	1.41577e+06	3.72378e+06	1.35361e+06	4.23511e+06	1.74829e+06	2.78045e+06	1.95728e+06	1.54689e+06	3.41868e+06	1.07342e+06	5.28783e+06	3.94109e+06	1.46653e+06	1.33405e+06	2.64949e+06	4.56067e+06	2.04546e+06	1.34687e+06	3.8175e+06	1.95878e+06	1.37665e+06	1.89741e+06	1.46507e+06	2.1673e+06	1.01988e+06	2.15939e+06
10.20_571.4727m/z	217607	256069	229242	476057	243547	97486.8	324052	104909	118216	435658	222973	174592	204059	138956	101832	138431	132876	199315	153883	347794	105201	182557	100728	137230	412436	169186	390737	176656	299897	216003	151389	238292	100452	454679	563215	125219	115923	349903	440496	199912	115413	439431	188197	165101	192399	129309	231275	87778.6	188050
10.21_1089.7751m/z	80275.3	95131.6	93957.5	86691.4	89004.5	88917.1	97224.9	97227.3	90148.6	113740	89382	64443.7	121043	92163	96385.6	92095.8	105448	128696	78515.4	73424.7	70924.3	78183.1	66232.3	101119	81120.4	55521.4	125661	88831.2	80354.7	81263	76637.8	109970	84932.3	95606	93949.1	101342	104628	72969.6	101140	104321	94820.5	93961.5	104831	94525.9	104835	103597	106332	74368.2	99415.7
10.21_968.9123m/z	22337.4	24295.2	17225	25840.7	22145.2	19320.5	10637.6	19711.6	19621.1	16379.6	17884	21053.6	16139.5	18706.3	19858.5	18044.6	17502.7	10054.6	21016.1	13432.7	22493.3	17644.1	22550.2	19631.4	13604.3	22268.6	12858.8	25255	21919.1	24634.7	22298.3	32098.9	22375.7	8453.48	19955.5	25009.1	14969.7	20755.4	14866.7	15422.8	21140.7	21727.9	27667.8	15209.9	12809.9	17828.2	27027.2	28062.8	16913
10.23_597.4888m/z	831801	1.13819e+06	1.39941e+06	1.41499e+06	1.02875e+06	673468	1.68011e+06	502848	827977	2.33722e+06	783210	724630	1.22554e+06	503650	442705	675080	816400	1.64275e+06	587984	1.43047e+06	556715	793378	512011	874944	1.96294e+06	708855	3.33908e+06	1.09486e+06	1.26271e+06	1.14135e+06	674859	1.29107e+06	659711	1.8869e+06	1.99409e+06	548781	755277	1.45328e+06	2.50871e+06	933755	611009	2.02355e+06	848428	737613	1.11761e+06	716908	809767	481922	1.4323e+06
10.23_623.5055m/z	88505.7	113011	99353.4	163410	98760.6	63785.3	92956.9	71336	84107.9	104865	100266	88753.8	89096.8	73545.8	56563.7	77844.8	85607.1	110063	76886.2	120579	81616.2	68851.3	70004.1	69872.2	167859	101047	126959	85922.3	94548.9	89164.7	117004	214556	65888.7	135409	136047	95287.2	79980.4	207726	195466	92499.8	66050.5	151443	77883	76150.1	75945.9	71091.1	111500	91506.6	84560.3
10.23_852.7219n	1.77486e+07	2.07222e+07	1.93217e+07	2.60078e+07	2.08184e+07	1.09164e+07	23863920	1.27676e+07	1.36697e+07	2.67033e+07	1.74004e+07	1.59368e+07	1.63901e+07	1.43665e+07	1.11129e+07	1.47218e+07	1.5177e+07	1.82071e+07	1.51119e+07	2.28766e+07	1.22016e+07	1.82779e+07	1.20928e+07	1.42086e+07	2.78398e+07	1.53499e+07	2.71705e+07	1.71367e+07	2.31647e+07	1.86491e+07	1.45909e+07	2.2027e+07	1.24962e+07	2.84638e+07	3.08991e+07	1.44476e+07	1.34483e+07	2.67194e+07	3.01664e+07	1.90714e+07	1.36955e+07	2.95994e+07	1.79857e+07	1.49021e+07	1.80149e+07	1.42557e+07	2.01442e+07	1.10147e+07	1.8583e+07
10.23_870.8602m/z	950051	1.08375e+06	1.14936e+06	1.20353e+06	688202	437597	1.8057e+06	360424	635211	2.61821e+06	624911	474752	1.18917e+06	619508	411009	584961	712791	1.42811e+06	672462	1.17421e+06	447593	763280	407416	818026	1.47163e+06	611660	3.41027e+06	847365	1.2946e+06	984394	710647	1.57978e+06	509147	3.38061e+06	1.75015e+06	536198	728664	1.17588e+06	2.78509e+06	1.29285e+06	676873	2.06817e+06	840363	592401	931493	739771	891166	379859	1.30647e+06
10.23_920.8716m/z	48104.6	69013.1	52678.8	116343	81449.5	37379.4	78028.1	39692	56606.2	57667.6	60949	51444.4	51771.1	37660.3	19302.4	38578.9	62875	60034	31624.3	66875.1	45178.3	24732.8	40640.4	52068.2	132485	66475.8	92871.4	59847.9	63404.7	52199.6	66914.5	158385	28503.5	98994.6	116137	32696.1	45367.5	181838	144569	60922.6	42137.6	108790	58105.6	32232.6	39082.8	28847.8	41967.2	36577.3	40217.8
10.24_1097.7732m/z	222364	237029	182484	317672	236236	138421	207831	161512	189102	174782	199532	164750	185906	192439	137780	178207	263322	199626	194943	211849	241376	137623	179379	179032	340460	191291	232885	211886	221702	189495	283069	499517	131563	201594	231548	221721	187416	376449	348842	194267	175553	269862	213621	184264	186661	164953	250261	246651	192065
10.24_1119.7678m/z	58429.5	74664.7	45861.6	79461.7	73174.4	64541.2	51705.3	64642.3	78621.2	49369.7	64922.9	65132	49352.3	64976.1	58530.4	68248.8	57577.8	67270.1	70057.5	48947.2	73313.5	50210.8	57030.6	53022.1	76347.3	86667.3	41343.2	76053.1	62264.6	57034.3	61109.3	110592	63925	57966.6	41279	67358.5	64814.2	84101.5	55635.6	61950.9	77854.4	44463	68059	76682.8	66414.9	78472.5	84166.3	85719.7	57073.1
10.24_1779.4293m/z	16798.2	127242	13934.7	132390	56732.4	12932.9	45618.6	6967.31	19616.1	18972	13498.2	12455.1	16356.7	14451	69799.8	18063.5	109884	27349.9	25106.4	19985.8	28591.1	15411.7	12791.6	28834.8	450698	59650.4	127209	46020.4	81216.1	71662.8	57226.9	435199	61429.7	50598	41739.5	19890.5	10273.9	100876	84791.8	39833.1	6856.11	117845	41121.3	37430.6	48629	13073.4	70118.6	11108.5	20648.1
10.24_261.2216m/z	45578.4	42399.8	40608.4	35786.4	38250.6	38042	43670.9	38448.3	43550	46659.6	40186.6	39046.4	39597.6	40848.1	35994.3	41946.5	41625.3	38996.2	37953.5	41493.6	35115.7	39876.9	39214.9	41232	41147.7	42534.4	45879.2	38020.7	42585.2	42270.6	42172.6	36732.7	42571	35415.2	40352.7	38530.4	43426.9	38727.6	43334.6	38913.2	41490.8	46193.4	42492.6	36497.3	46548.8	40385.7	41377.2	34322.1	41163.1
10.24_647.5015m/z	118719	130816	110373	170026	113661	75033.3	104609	84031.7	120011	128557	113282	96457.3	120616	91792.4	75508.4	95535.4	154066	138109	116120	139339	121127	82954.5	102607	94285.6	194378	107640	141934	107576	114364	116658	143476	325642	73005	138686	139917	122903	95446.2	225240	250740	128499	106155	184147	116002	99326.9	110519	99761.9	141783	134250	123463
10.24_902.7384n	1.37587e+06	1.71958e+06	1.27199e+06	2.66288e+06	1.62485e+06	662946	868442	937946	1.1465e+06	749595	1.42977e+06	1.27869e+06	912873	1.00577e+06	761691	1.02168e+06	1.57618e+06	1.09996e+06	1.44536e+06	1.25937e+06	1.55377e+06	659120	1.20113e+06	864237	2.103e+06	1.60612e+06	736262	1.34363e+06	1.13347e+06	1.07816e+06	2.20496e+06	4.02646e+06	748844	1.18033e+06	1.57392e+06	1.47236e+06	840365	3.04758e+06	2.28213e+06	1.19832e+06	874862	1.93732e+06	1.27059e+06	1.1226e+06	938018	841687	1.67463e+06	1.94388e+06	923527
10.24_979.8216n	1.21639e+06	1.56916e+06	1.20183e+06	2.32868e+06	1.34543e+06	662329	944129	926703	1.03472e+06	929129	1.27769e+06	1.12546e+06	974695	1.06008e+06	818907	1.02087e+06	1.64052e+06	1.06293e+06	1.35682e+06	1.29243e+06	1.41396e+06	716739	1.08641e+06	847151	2.08577e+06	1.34258e+06	862554	1.19185e+06	1.12779e+06	1.05672e+06	1.93662e+06	3.86666e+06	751096	1.13038e+06	1.34884e+06	1.42488e+06	833296	2.75878e+06	2.5136e+06	1.21481e+06	917469	1.82584e+06	1.29416e+06	1.07639e+06	1.16412e+06	895198	1.71425e+06	1.79604e+06	1.01787e+06
10.25_946.7868m/z	4.61486e+06	5.7176e+06	4.65031e+06	7.49448e+06	3.11631e+06	2.40983e+06	4.32832e+06	2.55866e+06	3.62602e+06	5.04194e+06	4.78775e+06	2.55647e+06	4.69407e+06	3.69322e+06	3.01687e+06	3.61867e+06	5.36317e+06	6.01768e+06	3.71317e+06	3.734e+06	4.39298e+06	2.66193e+06	3.16551e+06	2.99682e+06	5.92053e+06	2.76272e+06	5.43741e+06	7.06977e+06	3.53414e+06	4.06666e+06	5.75283e+06	1.66524e+07	2.0249e+06	5.04275e+06	6.43571e+06	4.0627e+06	3.17312e+06	9.58645e+06	8.11021e+06	3.99966e+06	2.5873e+06	6.81266e+06	5.30735e+06	4.37218e+06	3.55629e+06	3.2627e+06	3.86123e+06	5.0243e+06	3.8221e+06
10.25_949.8148n	2.08649e+06	2.37207e+06	1.76145e+06	2.37757e+06	1.32703e+06	1.31221e+06	1.58356e+06	1.42275e+06	1.6615e+06	1.49537e+06	1.98532e+06	1.3279e+06	2.08433e+06	1.8132e+06	1.62104e+06	1.78033e+06	2.1054e+06	2.22699e+06	1.65556e+06	1.38688e+06	1.90433e+06	1.29898e+06	1.51757e+06	1.38515e+06	1.89852e+06	1.41302e+06	1.6788e+06	2.47279e+06	1.47516e+06	1.60733e+06	2.43835e+06	4.92246e+06	1.18869e+06	1.74398e+06	1.73893e+06	1.85469e+06	1.50987e+06	2.83752e+06	2.632e+06	1.59926e+06	1.35595e+06	2.00043e+06	2.10974e+06	1.86416e+06	1.5113e+06	1.56404e+06	1.69535e+06	2.2463e+06	1.53548e+06
10.25_951.7432m/z	1.71412e+06	1.95916e+06	1.6767e+06	2.10635e+06	1.24505e+06	1.06406e+06	1.60338e+06	972430	1.28696e+06	1.91776e+06	1.5481e+06	1.0121e+06	1.81657e+06	1.38664e+06	1.20734e+06	1.38342e+06	1.63923e+06	1.97859e+06	1.31469e+06	1.23362e+06	1.50492e+06	1.24176e+06	1.22931e+06	1.22516e+06	1.75391e+06	1.041e+06	1.77701e+06	2.01702e+06	1.42211e+06	1.42854e+06	1.77008e+06	3.73486e+06	916293	1.74212e+06	1.82529e+06	1.49504e+06	1.24804e+06	2.3907e+06	2.39112e+06	1.50273e+06	1.12263e+06	2.12434e+06	1.81154e+06	1.50331e+06	1.53811e+06	1.29734e+06	1.45868e+06	1.64742e+06	1.35276e+06
10.26_967.7162m/z	192094	179003	114414	156572	124167	139556	109787	151168	174979	100215	185153	119630	152434	180110	174961	163135	193643	140845	175798	107271	206697	115883	155379	134525	126608	156035	72341.7	204923	116172	144425	232528	301253	126345	93524.6	125363	183523	150661	227382	129188	164637	159251	124766	179203	166580	123738	155513	152207	248174	124174
10.30_1004.7672m/z	62761.7	65443.8	46984.5	39759.3	49140.8	58557.2	50097.4	52826.1	63320.5	57005.6	49793.8	49104.9	62051.3	60637.2	55785	60334.6	62396.4	47794.3	49271.3	40148.6	60239.2	47588.6	55466.3	52879.6	41132.2	55782.8	39452.6	54868.3	42324.9	48923.2	59993.5	66905.4	52814.6	44190.5	36085.9	54983.1	65160.1	43965.8	53202.5	45531.4	56246	47074.4	57568.5	49200.6	55608.5	62266.7	40028.8	60571	50141.2
10.33_913.7164m/z	543443	703707	667101	888021	607126	362042	672032	353197	424796	924639	536628	446854	482899	435280	392291	485760	525522	573448	443477	627016	423126	530971	428828	420030	858461	401915	757940	549714	626712	549270	461119	808415	358009	728504	912938	608744	431985	809910	858137	601297	414435	897591	581531	459100	557724	448340	605474	395855	556002
10.34_1125.8054m/z	84604.6	100400	106250	91312.6	65900.1	93623.6	93667.4	81167.6	99246	112985	69343.5	63223.8	117975	95558.3	111465	104577	113541	117604	84884.9	79820.7	130883	136928	120530	113943	96903.5	62205.9	130253	115596	110233	97338.8	66158.7	190078	77217.1	111760	91853.4	93152.8	96541.1	73192.7	113317	84955.1	88315.7	75493.5	123168	88539	97497.6	108127	77494.5	81063.9	91344.1
10.35_649.5193m/z	149111	209363	147903	156551	134576	88021.6	161636	86767	105565	218268	125083	105630	197357	131235	116796	130301	150472	152993	127359	146388	137379	134544	131890	110894	251171	115187	199237	178545	176706	123617	149820	275645	97978.3	248809	165505	137712	122907	213125	251539	156740	126957	222642	166244	118789	151759	118936	169878	143295	147673
10.35_949.8036m/z	2.28578e+06	3.21142e+06	2.50951e+06	2.94661e+06	2.1814e+06	1.27866e+06	2.98343e+06	1.33724e+06	1.63345e+06	3.33099e+06	2.19587e+06	1.3972e+06	2.87417e+06	1.99201e+06	1.68685e+06	2.04223e+06	2.43617e+06	3.15126e+06	1.65162e+06	1.96398e+06	2.16539e+06	1.81078e+06	1.83224e+06	1.62874e+06	3.0744e+06	1.28519e+06	3.36212e+06	2.87659e+06	2.16409e+06	2.001e+06	2.17975e+06	4.90447e+06	1.20827e+06	3.43093e+06	3.32004e+06	2.13611e+06	1.9381e+06	3.72328e+06	3.69613e+06	2.19835e+06	1.47697e+06	3.47802e+06	2.85584e+06	2.02276e+06	2.2214e+06	1.70599e+06	1.86959e+06	2.02503e+06	1.98246e+06
10.35_977.7590m/z	219681	235009	178317	204500	164491	179378	163160	170742	191614	148799	202344	135716	226762	237259	201369	199890	198124	173798	188793	118109	210014	140879	190298	162186	150203	159346	124523	227750	146519	174440	255471	335338	160394	148199	123565	216475	184869	225803	224172	160813	159760	202605	222810	200009	170574	166293	192068	259065	148187
10.35_989.8068n	520698	660490	407634	592715	390474	313695	471488	327980	475843	523996	509730	308280	724160	489626	399517	513909	542380	659102	460880	334838	569403	376881	461089	384345	589761	323601	559408	644981	419287	427740	560111	1.03223e+06	318130	533083	478615	483445	435958	860912	638166	419975	352907	652404	610386	457722	454177	444942	425782	637337	402013
10.36_1072.7664n	744243	912907	722944	1.06648e+06	996583	468925	937477	642522	738570	817911	931129	841936	595514	795988	640979	775573	822567	797388	745701	971866	665539	668169	636822	624624	1.04286e+06	576020	887818	801276	747602	720713	760135	992897	589862	906722	1.43415e+06	706169	684150	1.36116e+06	1.0571e+06	667053	610468	1.15029e+06	764738	836015	835470	624586	760283	777406	705138
10.36_1780.4413m/z	81913.1	327002	146458	497784	277142	19749.7	238010	101520	54392.6	165498	263704	120178	21159.2	129488	40973	144709	170010	211345	94525.8	331107	96817.6	78787.6	39899.7	74466.5	552929	23504.3	323143	292479	55456.8	159129	107813	369885	14866.2	354994	702832	106411	46339.6	708088	370582	56230.4	46355.9	532709	120180	181389	208171	68708.2	150189	124777	92962.9
10.36_1806.4541m/z	189360	391210	195696	319331	161178	6229.97	267245	11906.6	77711.2	264208	184287	54766.5	119978	169625	83529.4	174508	274556	327132	118419	132949	191949	131745	50350.8	51383.6	337156	28050.3	407248	271736	229525	174293	181089	726527	18795.6	343577	402018	164989	205890	416648	423078	154202	76064	395308	305238	163270	180794	54455.8	157490	150719	164958
10.36_904.7536n	3.79305e+07	5.01425e+07	4.17553e+07	4.69362e+07	3.12622e+07	2.05445e+07	4.57765e+07	2.02447e+07	2.56545e+07	5.54055e+07	3.13324e+07	2.2055e+07	3.96255e+07	2.84433e+07	2.49869e+07	2.94087e+07	3.5087e+07	4.73878e+07	2.80919e+07	3.50708e+07	3.35507e+07	3.06345e+07	2.73341e+07	2.73427e+07	5.11746e+07	2.00126e+07	5.90858e+07	4.37525e+07	3.53299e+07	3.36303e+07	3.57716e+07	7.6234e+07	1.7956e+07	5.6994e+07	5.42388e+07	3.07006e+07	2.94073e+07	5.49063e+07	5.70258e+07	3.39555e+07	2.32439e+07	5.28989e+07	3.94595e+07	3.01744e+07	3.45094e+07	2.77802e+07	3.23931e+07	3.13011e+07	3.56163e+07
10.36_955.8601n	5.02004e+06	7.05019e+06	5.16746e+06	7.89065e+06	6.62983e+06	2.31411e+06	5.74435e+06	3.80969e+06	3.93104e+06	5.61593e+06	6.02306e+06	4.79956e+06	3.10161e+06	4.41069e+06	3.34672e+06	4.44679e+06	5.00823e+06	4.85776e+06	4.20945e+06	7.22697e+06	4.33702e+06	4.04428e+06	3.84668e+06	3.37041e+06	6.80642e+06	2.9716e+06	6.2206e+06	4.85433e+06	4.34644e+06	4.34502e+06	5.27558e+06	8.04208e+06	2.69793e+06	5.78293e+06	9.89556e+06	4.15986e+06	3.74141e+06	1.0417e+07	7.02206e+06	4.07752e+06	3.01915e+06	8.73591e+06	4.94751e+06	4.986e+06	4.89381e+06	3.18922e+06	4.46809e+06	4.52307e+06	4.34641e+06
10.36_981.8356n	6.72058e+06	7.74199e+06	6.68432e+06	5.89499e+06	4.63326e+06	3.77385e+06	6.55007e+06	3.44068e+06	4.51265e+06	7.40092e+06	5.03736e+06	3.39389e+06	7.0508e+06	5.26924e+06	4.88206e+06	5.36875e+06	6.28254e+06	7.97747e+06	5.27298e+06	4.63331e+06	6.03544e+06	5.22096e+06	5.13956e+06	4.72612e+06	6.68787e+06	3.38645e+06	7.92592e+06	7.13985e+06	5.69792e+06	5.41388e+06	6.47621e+06	1.16296e+07	3.57702e+06	7.46836e+06	6.63455e+06	5.57565e+06	5.52458e+06	8.00189e+06	8.40969e+06	5.52285e+06	4.52022e+06	7.05653e+06	6.96454e+06	5.42206e+06	5.97387e+06	5.31683e+06	5.58806e+06	6.10197e+06	6.01168e+06
10.37_623.5049m/z	454326	616371	453456	740890	463390	203417	509775	305362	311918	573370	526166	394999	396809	425242	333341	438641	449605	528228	393477	640128	422579	367327	332675	284735	762260	311417	613680	525234	425538	393237	438017	796680	217248	608519	949193	383867	349251	962563	686813	401383	289124	863588	490373	458138	454823	320543	427649	391134	403009
10.37_878.7385n	4.80588e+06	6.31536e+06	4.94378e+06	8.73069e+06	7.36862e+06	2.86285e+06	6.88964e+06	4.62144e+06	4.54365e+06	5.93381e+06	6.98022e+06	6.31973e+06	3.33511e+06	4.93946e+06	3.85283e+06	5.24141e+06	5.39984e+06	5.67175e+06	4.84756e+06	7.1715e+06	4.61263e+06	4.2277e+06	4.28705e+06	3.92415e+06	7.58561e+06	3.5132e+06	6.6372e+06	5.53127e+06	4.85952e+06	4.78521e+06	4.98621e+06	7.59545e+06	3.24956e+06	7.00411e+06	1.05352e+07	4.77553e+06	4.30365e+06	1.04179e+07	7.63979e+06	4.66067e+06	3.41881e+06	8.83582e+06	5.15465e+06	5.86711e+06	5.79663e+06	3.6305e+06	4.80692e+06	5.19071e+06	4.76536e+06
10.37_922.8899m/z	461150	486372	460174	588034	305511	168348	620948	190970	283640	530031	356319	223761	399589	307544	300670	335533	414105	505366	308572	384031	335526	241493	267443	222505	554236	224516	688349	604214	470547	419479	422596	950787	141394	668412	877015	341005	301694	683047	660243	379431	202572	657172	394630	359269	312312	247617	357505	294604	343175
10.38_896.8682m/z	744085	872896	782812	1.68028e+06	976658	322152	1.06169e+06	662851	657962	884991	1.04802e+06	888017	450023	662248	481091	752647	822451	837104	735635	1.56995e+06	582198	466658	496543	428895	1.49175e+06	652906	1.25224e+06	918772	876591	761360	723163	1.29513e+06	332821	1.15757e+06	2.96452e+06	619965	531447	2.36231e+06	1.32053e+06	682596	365964	1.85922e+06	664148	709005	766555	424519	803656	590564	665593
10.39_1730.4301m/z	248219	363435	149063	376727	190279	9783.35	157419	18637.4	59486.9	320971	281268	46095.1	29392.3	116632	30017.6	130576	107108	100289	136003	93532.3	78666	125943	43593.7	35112.6	339288	30396.3	231516	118048	130793	40129.7	63163.3	323701	20264	213548	377465	64483.1	62841.7	404729	327336	89265.5	22287	331627	100929	94844.6	164297	34620.2	236099	14118.3	42232.9
10.39_693.5702m/z	195603	173901	156762	135640	167553	202509	181240	184896	236457	157271	171965	179380	199614	183405	198389	199104	189106	191001	197544	145571	190292	192305	181794	182365	126080	177749	148346	192030	163162	204501	209142	176089	219837	144913	139881	189224	204648	166513	169709	176722	195074	138594	193451	198034	192139	211410	196669	206535	184741
10.43_1683.4431n	3.59875e+06	4.49015e+06	3.44004e+06	5.18736e+06	4.67629e+06	1.59967e+06	4.53562e+06	2.3208e+06	1.86844e+06	5.26857e+06	3.53551e+06	3.38378e+06	2.208e+06	3.4321e+06	2.03508e+06	2.96366e+06	3.35359e+06	2.27652e+06	3.79211e+06	4.95658e+06	2.01808e+06	3.76642e+06	2.31093e+06	1.87195e+06	5.84649e+06	3.07664e+06	4.54702e+06	2.68558e+06	5.06747e+06	3.428e+06	2.63016e+06	3.66675e+06	1.6525e+06	6.31189e+06	6.08901e+06	2.92282e+06	2.17665e+06	5.21714e+06	6.00903e+06	3.49944e+06	2.34478e+06	5.66809e+06	3.14255e+06	2.52411e+06	3.58387e+06	2.24236e+06	5.05298e+06	2.03161e+06	2.90661e+06
10.43_573.4890m/z	2.53165e+06	2.93621e+06	2.42873e+06	4.46696e+06	3.10346e+06	1.25628e+06	3.34608e+06	1.3405e+06	1.36613e+06	4.80391e+06	2.5066e+06	2.22195e+06	2.16822e+06	2.17107e+06	1.58246e+06	1.82863e+06	2.5198e+06	2.14715e+06	2.84686e+06	4.03078e+06	1.84256e+06	2.91488e+06	2.04638e+06	1.59467e+06	5.05139e+06	2.35252e+06	4.11106e+06	2.1557e+06	4.65593e+06	3.04273e+06	1.84898e+06	3.59099e+06	1.17121e+06	5.00463e+06	5.33001e+06	2.2532e+06	1.67089e+06	3.88467e+06	4.73757e+06	2.60155e+06	1.90486e+06	4.98049e+06	2.57877e+06	2.03379e+06	2.62615e+06	1.78516e+06	3.82574e+06	1.64561e+06	2.7226e+06
10.43_847.5788m/z	55465.1	134081	82323.6	165170	118432	34771.9	96072.6	52370.4	47423.4	85170.5	48099.6	72712.5	67594.3	75771.6	48254.4	56080.6	85258	47301.2	64602.9	90035	35882.7	82676.8	80035.1	84547	256861	167350	199367	94648.8	123552	93012.1	75915.5	76721.8	38189.7	130245	144383	44939.6	37641.2	118737	101671	85024.1	38680.8	119922	72851.1	51631.4	88092.9	47642.3	82417.7	45256.9	63964.6
10.43_863.7594n	6.93967e+07	1.17904e+08	9.8857e+07	1.75453e+08	1.17475e+08	3.99397e+07	1.21765e+08	7.59687e+07	4.93326e+07	1.67079e+08	1.02767e+08	9.75265e+07	6.00923e+07	7.64313e+07	4.23438e+07	7.57751e+07	7.34703e+07	6.11202e+07	8.89647e+07	1.90655e+08	5.02711e+07	8.36807e+07	5.78215e+07	4.73789e+07	2.08563e+08	1.07108e+08	1.50775e+08	8.3789e+07	1.42965e+08	9.28931e+07	6.4017e+07	9.55474e+07	4.36193e+07	2.05177e+08	2.03548e+08	6.26072e+07	4.63239e+07	1.63441e+08	185690322	8.52192e+07	4.65742e+07	1.85938e+08	7.39293e+07	6.2929e+07	8.9743e+07	4.86241e+07	1.32862e+08	5.02383e+07	6.89618e+07
10.43_872.8634m/z	248963	300959	282057	243168	272801	262086	476099	227175	99867.2	426581	134766	175705	194173	181228	197951	211338	368116	276105	255533	349645	269577	367169	177922	343958	320800	308878	748578	279386	574847	491112	214306	302854	97809.6	613629	265304	184319	156601	297327	410030	569083	182057	811392	224600	142417	285971	191621	353307	187898	333384
10.43_888.8000m/z	1.25692e+07	1.68644e+07	1.47178e+07	2.17226e+07	1.76001e+07	7.75007e+06	1.63685e+07	1.26541e+07	9.52438e+06	2.04071e+07	1.66306e+07	1.54666e+07	1.05179e+07	1.36775e+07	9.33347e+06	1.34697e+07	1.31335e+07	1.04531e+07	1.54082e+07	2.12699e+07	9.77584e+06	1.43286e+07	1.14085e+07	9.19664e+06	2.41073e+07	1.5571e+07	1.85146e+07	1.35652e+07	2.01965e+07	1.49596e+07	1.22826e+07	1.36594e+07	9.46288e+06	2.17214e+07	2.30636e+07	1.26029e+07	9.41464e+06	2.00225e+07	2.11848e+07	1.51775e+07	9.38411e+06	2.17572e+07	1.28638e+07	1.17112e+07	1.46681e+07	1.0211e+07	2.11321e+07	1.01224e+07	1.1844e+07
10.43_888.9025m/z	346082	349126	364063	440272	407312	203141	489058	307465	255144	385718	420077	380629	287189	333391	257055	385976	369981	250321	433571	540938	243761	348604	276196	241699	638978	354123	491703	297324	523509	392207	370702	314171	214677	550871	509312	300150	216963	511515	498584	449773	213350	642180	322324	274840	381721	211596	543618	232770	257623
10.43_894.8119m/z	335651	321611	353804	369362	351500	304672	306770	384785	347241	386264	319251	390056	323957	314883	312043	350811	369071	315929	338325	448737	323275	292825	297246	322190	290535	330317	397933	364775	310648	286873	298485	347814	310134	316917	410874	334728	329770	388352	390682	368522	338941	301701	268900	314223	356270	370020	374276	348088	345581
10.46_575.5046m/z	1.00793e+07	1.38116e+07	1.41892e+07	1.57564e+07	1.13864e+07	7.40188e+06	1.46029e+07	9.278e+06	8.33646e+06	2.24857e+07	9.47433e+06	9.86933e+06	9.01571e+06	9.53056e+06	7.28772e+06	8.92436e+06	1.34977e+07	1.30343e+07	1.15659e+07	1.91435e+07	9.6364e+06	1.27972e+07	9.82441e+06	1.04344e+07	2.34194e+07	1.12225e+07	2.79256e+07	1.02759e+07	1.78653e+07	1.28465e+07	8.86793e+06	1.69559e+07	6.88748e+06	2.5477e+07	1.88134e+07	9.6541e+06	9.80922e+06	1.68691e+07	2.8683e+07	1.35077e+07	1.02036e+07	2.15011e+07	1.07578e+07	8.51082e+06	1.27271e+07	9.2849e+06	1.57321e+07	8.88786e+06	1.57926e+07
10.46_855.7449m/z	3.41413e+06	5.31662e+06	5.8364e+06	5.77428e+06	4.48342e+06	2.69518e+06	5.86571e+06	3.04699e+06	2.98902e+06	8.44016e+06	3.32622e+06	3.378e+06	3.34139e+06	3.45941e+06	2.41617e+06	3.30692e+06	4.70577e+06	4.6633e+06	4.19918e+06	6.96269e+06	3.6973e+06	4.93455e+06	3.95923e+06	4.27641e+06	8.95122e+06	4.02119e+06	1.09491e+07	4.37502e+06	7.42768e+06	5.494e+06	3.55746e+06	6.15228e+06	2.52382e+06	9.24598e+06	8.20895e+06	3.46482e+06	3.53178e+06	6.34679e+06	1.03961e+07	4.79602e+06	3.75628e+06	7.80103e+06	4.10565e+06	2.94148e+06	4.95402e+06	3.31506e+06	6.20399e+06	3.27356e+06	5.83231e+06
10.46_873.6034m/z	420308	396977	581479	450413	418973	353627	496205	306697	367891	723891	282575	399045	368159	353219	282756	295358	517752	426573	347276	636571	295441	516648	376539	406804	740323	326553	1.09972e+06	331496	684320	396405	304499	601474	303479	766352	668784	406728	396462	485259	923757	444357	447047	527858	515364	256671	400447	416715	522825	320132	798788
10.47_855.0258n	883072	1.23084e+06	1.83676e+06	1.14495e+06	888628	642159	2.06447e+06	531627	795323	4.10007e+06	541144	588871	864000	734827	519228	664559	1.76035e+06	1.64518e+06	837601	1.58443e+06	971253	1.46681e+06	1.20093e+06	1.15654e+06	3.04973e+06	879563	6.51885e+06	930598	2.29123e+06	1.37183e+06	789945	2.58355e+06	546674	4.09944e+06	1.80957e+06	792157	939896	1.4865e+06	6.05333e+06	1.78745e+06	1.17424e+06	2.97912e+06	904704	583528	1.55122e+06	845712	1.60476e+06	713594	2.11518e+06
10.47_856.5753m/z	106697	142062	147553	129578	139889	95384.1	120654	114850	96402.8	276134	106963	110645	109478	125568	97109.1	139852	191711	144517	123829	154040	86252.7	146570	114497	125776	247564	133784	262925	143919	188578	186482	99270.9	179134	76057	233025	219892	122517	99226.8	182824	251268	176182	148551	251181	130638	87352.2	141973	128849	215496	102737	164547
10.47_914.9179m/z	1.3235e+06	1.23906e+06	1.2182e+06	1.17597e+06	1.1573e+06	1.10898e+06	1.72041e+06	983223	1.14612e+06	1.44607e+06	1.05542e+06	1.0569e+06	1.13618e+06	1.07614e+06	881794	1.1196e+06	1.47955e+06	1.34279e+06	1.33526e+06	1.52631e+06	1.00348e+06	1.27585e+06	1.1476e+06	1.29238e+06	1.60712e+06	1.18746e+06	1.64309e+06	1.15631e+06	1.71504e+06	1.5027e+06	1.1511e+06	1.41128e+06	866446	1.69581e+06	1.57004e+06	992898	1.17363e+06	1.33665e+06	1.69643e+06	1.70161e+06	1.131e+06	1.62894e+06	1.15472e+06	1.03238e+06	1.49426e+06	1.11692e+06	1.46275e+06	950405	1.60026e+06
10.50_1099.7879m/z	128540	120995	123035	222633	192640	106899	97263	92087.8	137070	95175.5	131805	138665	136462	121635	93252.8	107928	166499	78284.1	157822	122343	178989	62830.3	127633	88344.2	134289	122521	65615.5	100284	104852	102988	170818	250764	85811.9	90144.1	127882	161602	97241	246055	179099	110709	104868	134962	137877	129314	107508	96333	141003	170870	118110
10.50_623.5060m/z	81764.7	90407.6	64416.8	152030	116776	64765.9	74698.9	69894.4	69482	68715.7	91478.4	95326.6	71259.3	72363	60913.9	79187.5	108065	76411.5	110064	124891	102787	59073.9	81749.6	57871.4	143154	117180	66579.4	69923.2	95232.7	89651.7	103888	159079	49166.7	73464.3	110773	95196.5	54000.9	178942	144867	78999.1	71107.5	116006	83312.4	69194.1	82971	65887	112824	108347	81292.6
10.50_649.5192m/z	156975	172540	131127	251623	171897	104565	131948	96378.5	135790	122900	135725	135541	139888	125647	107346	140093	182835	159651	191971	159918	158405	114978	147760	106847	202474	157781	132622	115681	141305	133855	172767	310686	90930.4	126418	176227	166619	110845	267886	232960	134900	136832	196806	150713	113721	135894	108793	185741	169204	133012
10.50_872.8632m/z	3.79128e+06	5.37066e+06	5.14644e+06	6.9353e+06	4.66914e+06	2.65937e+06	5.86989e+06	2.03475e+06	2.78407e+06	6.78505e+06	3.53991e+06	2.9661e+06	4.42681e+06	3.55683e+06	2.40466e+06	2.97743e+06	4.22571e+06	4.13773e+06	2.26042e+06	5.29778e+06	3.03133e+06	4.49063e+06	3.78722e+06	3.74826e+06	8.09782e+06	3.57631e+06	6.28198e+06	3.27585e+06	4.41692e+06	4.62034e+06	3.83118e+06	6.08967e+06	2.38137e+06	7.08904e+06	6.29444e+06	2.23849e+06	3.06506e+06	4.70445e+06	7.86202e+06	5.06104e+06	3.46499e+06	7.53431e+06	3.07021e+06	3.05358e+06	4.95352e+06	2.16057e+06	2.74474e+06	1.84484e+06	2.96152e+06
10.50_948.8034m/z	5.81665e+06	6.71927e+06	5.46278e+06	8.82984e+06	4.64611e+06	2.91718e+06	5.08771e+06	2.73599e+06	3.61039e+06	6.70799e+06	4.75251e+06	2.52105e+06	7.0287e+06	4.65931e+06	3.50544e+06	4.66494e+06	6.48756e+06	6.34568e+06	5.17915e+06	4.83493e+06	6.69372e+06	3.67614e+06	4.7113e+06	3.13871e+06	8.01547e+06	3.96969e+06	6.51045e+06	4.97632e+06	4.73071e+06	4.54017e+06	5.7238e+06	1.64644e+07	1.96303e+06	6.87821e+06	6.38606e+06	5.91565e+06	3.32065e+06	9.74468e+06	9.12527e+06	4.51031e+06	3.51409e+06	8.43388e+06	5.96634e+06	3.27173e+06	4.90463e+06	3.42955e+06	5.78553e+06	5.90642e+06	4.54145e+06
10.51_904.7529n	1.02295e+06	929379	782341	1.85795e+06	1.6008e+06	551273	694598	705373	877956	604984	1.23507e+06	1.05523e+06	940677	892784	574455	908051	1.09603e+06	728523	1.1621e+06	1.13318e+06	1.57878e+06	595112	1.05439e+06	560830	1.60164e+06	1.30528e+06	594346	667243	840071	838164	1.47882e+06	2.12728e+06	545489	721902	1.16607e+06	1.26127e+06	634408	2.07443e+06	1.49723e+06	715404	780667	1.33342e+06	1.08017e+06	829620	703519	573894	1.27517e+06	1.5408e+06	756629
10.51_981.8367n	876369	970889	692537	1.69428e+06	1.4607e+06	435601	632768	593863	759120	512152	839790	761273	867619	800307	506718	868320	1.17194e+06	672117	982363	861239	1.07832e+06	448010	822064	420011	1.19601e+06	1.08665e+06	424719	664448	677577	737971	1.32743e+06	1.99618e+06	497292	810564	946941	1.22774e+06	516079	1.89252e+06	1.37911e+06	692427	674930	1.18306e+06	937075	701096	720123	530499	1.08654e+06	1.18297e+06	511928
10.52_625.5198m/z	363011	438561	388759	455267	315161	246809	464028	217734	280877	551923	391984	295840	456749	402228	226047	330871	272959	522014	301801	480096	334483	348330	287879	272984	620037	305311	648455	426295	421309	341032	278249	527915	176021	771084	545342	337105	326834	650859	599777	372323	254468	635850	354068	263218	451568	269852	460788	331768	363700
10.52_990.8502m/z	299918	251215	211158	360231	221035	164749	207174	138677	291852	197315	220392	161073	236907	196094	211554	268030	420195	265564	305983	205727	362010	139880	210939	149833	263229	186419	150651	264552	171680	214294	398188	832164	92492	171210	251681	314713	188215	417335	350663	192291	162942	320797	330535	206692	169772	200335	264754	373575	167556
10.53_1148.9780m/z	59631.1	51409.5	44121.8	25720.5	37411.9	50351.6	40143.4	26134.4	56068.1	25774.5	49400.6	39777.9	35822.8	40968	64387.4	43459.1	57539.1	42055.4	49878.4	34727.7	57567.9	26388.5	50849.3	40937.4	35621.2	44874.8	27451.2	38824.1	54939.8	40932.9	59026.4	57324.5	76921.3	19145.6	24090	45896.2	62469.1	42549.6	36224.8	49203.7	54692.2	27111.9	54347.1	34670.5	59061.3	38498.5	56253.7	60825.6	36493.3
10.53_953.7585m/z	375649	335554	279646	515523	376646	187384	265967	249444	307568	362361	334046	221881	370373	337675	270927	326131	462218	316495	355120	226204	436171	178627	256777	180860	346767	242314	219736	272801	217841	266413	430379	1.12734e+06	167842	274750	405872	524263	246701	649342	483124	278338	232650	486201	421528	250867	287299	239326	323707	439733	204083
10.54_915.7337m/z	71604.8	90391.4	66656.3	101673	113369	38333.8	62933.6	55791.4	43743.2	74142.8	77587	60046.3	73382.1	61171.1	37513.9	51808.1	44359.8	44698.3	48364.3	67950	77192	62120	86978	38459	74530.3	89595.1	30702.6	63993.7	38720.3	50883.8	78362.2	139270	39824.1	64222.8	101541	86008.5	48065.9	102242	96431.1	101807	58455.8	88378	55125.2	61888	47987.8	54179.5	64847.4	60682	76297.2
10.56_979.7734m/z	89314.1	85313.3	86573.8	93266.3	70982.6	78548.7	60122.9	54302.9	71487.6	51741.3	65045.2	98613.7	122490	96070.8	83199.4	83515	75048.3	78344.6	79392.8	54437.3	77849.2	54498.1	69291.8	83657.9	78049.4	72284	67179.7	59605.5	46131.8	51278.6	95138	140026	65917.8	76280	84028.8	78433.4	78021.7	103292	123223	75300.9	73645.3	94909.7	100886	64602.9	82443.1	68408.4	86063.6	94062.6	80912.7
10.58_1127.8228m/z	153160	171796	164135	115453	112516	139219	123286	99882.1	139237	136639	129709	103370	150113	154619	122940	134485	144880	165227	140706	105149	150608	138700	129129	137941	127630	109198	107542	128777	106497	125939	140327	171241	103221	126342	104066	132326	119718	126372	165488	105500	112359	112528	114564	120766	130830	138900	149961	137647	148076
10.58_933.7889m/z	174458	185129	174871	158862	128663	133621	135994	133191	137039	161198	158459	140726	157579	184244	159189	155074	195325	136303	172192	141960	168505	173583	196050	179108	188963	171258	193633	179459	151898	143359	189805	261449	142418	140259	135205	149656	122742	161940	225780	170638	161632	243394	179720	176189	177830	165601	189239	175382	152741
10.59_651.5353m/z	294962	411348	292971	382275	318596	167371	299227	182547	209966	404783	275494	220008	368681	253982	245980	274856	293221	281904	283547	308487	283725	222343	259329	188710	494089	266414	367795	316837	384098	276887	274504	437329	169278	437782	342259	307503	213683	467712	477517	263627	215159	468451	281362	217959	287027	213049	375039	290369	276195
10.61_1006.8752m/z	969503	981172	840919	743006	811276	680265	897920	632762	821760	839071	798593	654835	1.07311e+06	839267	804202	821673	868618	924582	836187	649466	904199	720870	759469	680722	863572	626704	881855	822606	798049	732742	908556	1.22105e+06	670753	914833	796594	898416	844874	998107	1.03761e+06	778333	817522	911106	917438	717003	813156	775393	823281	902838	776821
10.61_1100.7988n	991811	1.07159e+06	888894	955727	919412	565023	960328	596161	779041	1.00775e+06	827312	641118	1.10359e+06	786374	769594	869387	915334	967078	853570	688950	934444	677054	698183	515276	1.00152e+06	574371	937648	791396	779366	721062	934439	1.52018e+06	549507	1.01849e+06	972818	998914	802904	1.17063e+06	1.21192e+06	854687	765788	1.11062e+06	948898	739570	849223	718535	910469	897673	744845
10.61_906.7695n	4.45364e+07	5.81069e+07	5.01567e+07	7.08109e+07	5.0335e+07	2.27963e+07	5.11609e+07	2.43389e+07	3.00659e+07	6.34124e+07	4.28656e+07	2.87084e+07	5.41281e+07	3.74901e+07	2.98405e+07	4.01027e+07	4.60889e+07	5.31166e+07	4.65397e+07	4.4688e+07	5.7409e+07	3.3636e+07	4.18002e+07	2.85954e+07	7.49412e+07	3.28649e+07	6.01832e+07	5.06834e+07	4.88174e+07	4.63014e+07	4.31041e+07	8.70536e+07	1.91741e+07	6.16811e+07	6.59298e+07	4.87269e+07	3.38161e+07	7.70899e+07	7.10046e+07	4.12148e+07	3.27064e+07	7.32375e+07	5.13344e+07	2.98772e+07	4.14045e+07	3.3124e+07	5.67731e+07	4.54579e+07	4.23368e+07
10.61_983.8527n	6.69408e+06	7.62307e+06	6.86479e+06	7.40336e+06	6.93147e+06	3.61751e+06	7.04697e+06	3.95311e+06	4.64735e+06	8.46808e+06	5.95132e+06	4.23545e+06	8.41564e+06	5.58389e+06	4817021	5.92164e+06	6.67975e+06	7.20477e+06	6.10338e+06	5.49885e+06	7.03002e+06	4.89935e+06	5.51581e+06	4.16084e+06	8.28089e+06	4.63367e+06	7.52308e+06	6.558e+06	6.62056e+06	5.82836e+06	6.04615e+06	1.06875e+07	3.44512e+06	8.12583e+06	7.31081e+06	7.03421e+06	5.31038e+06	9.22118e+06	9.10624e+06	6.04076e+06	5.15644e+06	8.8348e+06	7.00452e+06	4.49484e+06	6.06042e+06	5.05545e+06	7.12086e+06	6.32175e+06	5.76705e+06
10.62_1074.7820n	521166	643261	509304	942393	822424	312511	581255	538248	498597	521954	768607	738136	410588	599235	447508	636981	559177	548753	631872	776167	522723	422973	514034	376502	781529	574826	547462	514786	548548	526217	540921	596041	383146	545988	1.02896e+06	560212	456709	1.13783e+06	666007	472808	401596	938435	511198	602897	570218	409970	641724	648367	485205
10.62_1761.4826n	84149.2	171901	148613	706679	480734	177556	178622	98391.7	32004.2	122454	314315	243203	18397.4	95023.8	23803.2	140267	111025	114013	218125	519665	157788	46788.6	47693.4	8404.8	419950	89869.3	151810	99894.6	111764	174260	77801.7	262910	3189.83	167320	934579	168879	5591.97	828409	260315	60975.3	39753.8	555705	98963.8	117255	157719	5417.19	243859	159841	51836.3
10.62_1810.4851m/z	109964	302117	149074	435701	291801	9355.96	159208	74410.6	38599.4	169866	294098	137831	76727.3	106211	50838.8	193305	195739	211428	251886	262329	301507	42842	111935	25501.7	340086	19156.5	207331	109610	224291	118254	109463	500946	15327	193705	464160	205341	68354.6	503261	338723	77374.6	38327.7	501103	161521	62760.2	124056	42556.8	296856	153773	75999.7
10.62_625.5200m/z	558706	766672	598250	1.18587e+06	793855	239348	580175	381561	374596	741153	758280	528777	582496	528207	401628	537376	520375	552112	633792	759792	647992	390428	527395	308254	1.00107e+06	503217	640277	667951	612148	572016	515150	814500	286088	714420	1.13529e+06	584650	375800	1.34033e+06	821546	513464	385185	1.08028e+06	590205	470907	512178	361151	721816	581992	460792
10.62_898.8803m/z	267868	440600	304117	932705	454130	99302.1	423894	209877	236842	326292	569962	302215	166937	201255	152236	246633	194318	200791	202108	374606	284384	139657	240497	115547	527637	447742	469606	373576	333349	301214	280710	366683	109430	394641	1.14474e+06	179939	196995	996307	371130	352728	138755	555888	171666	263210	233032	87373.1	364629	136453	200778
10.62_924.9032m/z	722158	1.07341e+06	778540	1.2198e+06	712641	342646	951852	373885	522328	986890	746983	453393	796000	469653	407540	625171	583905	708260	529754	671896	837891	534909	714652	385048	1.24135e+06	722759	1.26662e+06	984089	733409	822906	782068	1.69105e+06	256033	999944	1.05227e+06	685523	533385	1.21347e+06	961724	840895	448424	1.08453e+06	710087	450669	530462	330025	896102	531177	626723
10.62_945.7304m/z	1.92448e+06	2.19342e+06	1.82796e+06	2.48004e+06	1.90484e+06	1.01566e+06	1.6705e+06	1.02479e+06	1.41802e+06	1.97561e+06	1.52491e+06	1.16097e+06	2.17189e+06	1.67682e+06	1.3925e+06	1.70969e+06	2.31319e+06	2.13024e+06	1.89263e+06	1.55489e+06	2.18092e+06	1.43603e+06	1.46477e+06	1.17673e+06	1.99531e+06	1.20668e+06	1.83037e+06	1.6258e+06	1.57592e+06	1.57223e+06	1.96125e+06	4.34996e+06	943909	1.92605e+06	1.95258e+06	2.08411e+06	1.41474e+06	2.6071e+06	2.69708e+06	1.61879e+06	1.6056e+06	2.49195e+06	2.11043e+06	1.39315e+06	1.8384e+06	1.44396e+06	1.87631e+06	2.06765e+06	1.49824e+06
10.62_957.8372n	3.75408e+06	4.72174e+06	4.05905e+06	9.0888e+06	7.21896e+06	1.87833e+06	4.41378e+06	3.45065e+06	3.05643e+06	4.52797e+06	5.94007e+06	4.98635e+06	2.64552e+06	3.67128e+06	2.75115e+06	3.78996e+06	3.44152e+06	3.48946e+06	4.14767e+06	6.00964e+06	4.13191e+06	2.77602e+06	3.59775e+06	2.35413e+06	6.22992e+06	3.7291e+06	3.97539e+06	3.84144e+06	3.95188e+06	3.75352e+06	3.70353e+06	5.10215e+06	2.37544e+06	4.54397e+06	9.84392e+06	4.25129e+06	2.88556e+06	9.5181e+06	5.71471e+06	3.27115e+06	2.6173e+06	7.33369e+06	3.60423e+06	3.47018e+06	3.55819e+06	2.42399e+06	4.75871e+06	4.11926e+06	3.2659e+06
10.63_880.7543n	4.08299e+06	5.67996e+06	4.64442e+06	9.65824e+06	8.03171e+06	1.92733e+06	4.42913e+06	3.93167e+06	3.40377e+06	4.51254e+06	6.76641e+06	6.29156e+06	2.88294e+06	4.2806e+06	3.01377e+06	4.74017e+06	4.07171e+06	3.91998e+06	4.91906e+06	6.63432e+06	4.39316e+06	2.92453e+06	4.15488e+06	2.62006e+06	6.8505e+06	4.49335e+06	4.33292e+06	4.34803e+06	4.61526e+06	4.26653e+06	4.00888e+06	4.71128e+06	2.60769e+06	5.17768e+06	1.0048e+07	4.56931e+06	2.99329e+06	9.76913e+06	5.82693e+06	3.52423e+06	2.77915e+06	7.16047e+06	3.65799e+06	4.1064e+06	4.10193e+06	2.71105e+06	5.49204e+06	4.56743e+06	3.50606e+06
10.63_940.9352m/z	37294	76959.8	66586.7	150134	86645.2	22580.8	54723.7	52996.1	32974.7	53248.2	76491.4	38433.2	24858.4	20526.1	22284.1	26111.9	18916.8	29624.5	25669	69064.8	41135.7	24130.9	35103.5	21416.8	71558.4	66991.4	68140.9	50207	52749.4	39096.4	39918.2	103295	23738.3	56306.9	146575	31926.6	27587.9	98828.8	54921.5	44615.7	20866.8	51691	34712.7	31912.8	29569.6	14807.8	56810.2	22851.3	26357
10.65_368.4249m/z	59350.2	38480	48117	44199.4	50648.6	58739	46637.5	49529.8	52969.2	32771.1	47643.8	47391.4	47043.4	46301.9	57921.2	54639.4	46160.7	43902.3	41401.9	43193.4	45873	43962.8	45561.6	48511.3	55339.1	55383.7	42745.2	50722.3	56810.9	63581.7	67883.5	57321.8	49162.7	51608.2	42911.5	44573.6	46245.6	37492.5	38228.4	40054.3	55045.1	34524.7	43875.8	52091.6	30434.1	45050.4	44225.9	42936.8	44082.1
10.66_623.5070m/z	74383.3	81188.1	70028.1	68162.3	60526.2	62506.8	79253.8	56119.4	77823.5	102700	62457.9	53601	69656.6	59973.1	70382.2	70381.2	83700.3	94417.1	81940.8	56032.9	101085	53615	71838.9	69688.4	98548.7	67704.3	99762.8	79626	66620.2	91659.7	92046	162845	56901.2	62589	75184.1	74425.8	74870.7	100919	120513	81182.5	68904.9	94154.3	110230	70092	71504.2	74693.4	85249	82368	89293.1
10.67_1041.8989m/z	175462	153594	175679	161643	147179	157085	163187	162944	142058	132991	149278	134023	145511	140300	141823	130342	132858	122258	146958	126554	135359	142490	138828	146974	140562	138864	142251	158905	158278	194632	170414	157534	171980	142692	153287	156833	141871	159577	151331	134844	128345	146081	142814	144683	132307	137418	170760	153362	144360
10.67_259.2427m/z	18042.8	15634.6	21177.7	20082.6	13891.5	12994.9	12343.9	14440.8	13004.8	10469.4	13343.8	9362.47	18722.7	21103.8	16540.4	13631.1	14034.3	17145.7	17445.5	10602.7	22190.5	16922.7	19376.4	18296.3	7196.15	10150.1	12269.1	28760.2	16688.8	26536.8	17692.1	15728.7	16480.4	7865.62	6272.03	14080.1	11574.9	18650	11066.9	14177.6	11629	14305.2	17829.9	16714.6	15250	21565.2	21737.6	19325.8	20531.5
10.68_673.6091m/z	683806	589997	595618	626372	535821	608757	520944	608890	611135	486004	515110	537746	579767	588231	599417	563595	594715	610417	645282	528286	542405	517972	633176	605660	517607	621755	543051	664622	549550	618288	599031	574172	583064	494636	474802	579645	534257	571584	465550	551108	523450	508016	582682	596317	625768	690712	663098	689078	616374
10.70_848.9202m/z	454513	785047	575181	983441	1.04473e+06	297414	682949	682789	392826	832038	844515	1.0131e+06	383957	548452	311918	553773	839303	468059	695824	1.20548e+06	466519	570433	682797	552084	1.17848e+06	1.3862e+06	1.13185e+06	934553	1.43551e+06	750052	437772	498148	346216	984131	1.10652e+06	467783	447301	1.17511e+06	800319	694131	477256	1.19416e+06	488850	654731	725717	349059	843166	724443	640529
10.71_577.5985m/z	668899	833186	762405	883920	886787	484406	911521	657142	673845	1.28125e+06	796542	923435	770549	746915	496163	737729	1.19732e+06	950811	1.00478e+06	1.24299e+06	819334	853929	957836	796603	1.57241e+06	1.04277e+06	1.9551e+06	857298	1.5128e+06	1.06198e+06	596216	798107	483139	1.11902e+06	1.20577e+06	778860	864016	1.17151e+06	1.38027e+06	1.03216e+06	794106	1.53175e+06	695513	653736	1.11639e+06	671777	1.20845e+06	923033	1.16283e+06
10.71_577.6396m/z	5059.23	9076.44	6823.46	20991.8	10594.4	6140.22	8544.99	12532.1	16101.9	77714.7	9651.19	19438.3	17563.3	11939	15333.9	7277.6	43588.6	16812.7	5496.8	21123.1	16496.8	3846.6	19306.6	12004.6	105820	16168.9	45021.9	5787.69	31544.2	8814.92	5539.97	7417.53	7820.78	17685.7	58302.9	6939.29	7914.98	78121.1	129856	12983.9	7761.71	77650.8	12075.1	8018.12	11196.1	3946.46	19144.6	9832.13	9752.48
10.72_313.2737m/z	129399	129045	132345	156928	130927	104581	131041	114645	109890	146072	124177	135679	122359	117937	107352	115527	135340	119712	128360	154123	122738	114797	135807	116412	185566	144798	159881	129388	160628	137861	112438	125546	110611	136331	161664	118275	120916	176944	165993	122605	108653	152537	115718	123557	133419	111273	151694	124985	136862
10.72_552.5070m/z	373971	498114	433661	675259	584299	419663	444036	581287	443160	555190	550248	733072	335639	427920	396714	498904	636230	464172	581328	980212	545394	501263	741230	549224	1.04308e+06	1.11066e+06	819521	844567	887498	854279	412569	372798	488258	468305	674722	379374	458603	831309	597769	478643	381914	558149	432157	548056	558723	428204	653419	723736	646743
10.72_575.5053m/z	1.10025e+07	1.18672e+07	1.13259e+07	1.91122e+07	1.49184e+07	8.15966e+06	1.22982e+07	8.70676e+06	8.47191e+06	2.18821e+07	1.20391e+07	1.16755e+07	1.03006e+07	1.05009e+07	8.27613e+06	1.09027e+07	1.74838e+07	1.27142e+07	1.4908e+07	1.92154e+07	1.33747e+07	1.32874e+07	1.52109e+07	1.11973e+07	2.64212e+07	1.70859e+07	2.46848e+07	1.28186e+07	2.70963e+07	1.80928e+07	9.40072e+06	1.23381e+07	7.79483e+06	1.57124e+07	2.1177e+07	1.09981e+07	1.05392e+07	1.68556e+07	2.10592e+07	1.29673e+07	1.13635e+07	2.40191e+07	1.12396e+07	1.03426e+07	1.49475e+07	1.06994e+07	2.03194e+07	1.26419e+07	1.58374e+07
10.72_575.6181m/z	8227.53	8735.73	6806.27	15429.3	9643.49	10340.8	7501.49	10566.4	9010.22	37720.5	8622.64	9726.37	14542	10651.7	5887.71	8959.78	36833.8	2859.54	4827.13	9267.35	7379.28	5644.87	12673.1	6685.55	61476.2	13331.4	17548.9	14226.5	70683.4	10472.6	9008.58	9476.73	6948.06	43394.3	32659.3	8831.86	11750.1	15273.1	50059.3	11179.8	12851.9	96591	8507.93	5968.7	22084.2	2998.48	17273.3	4694.05	9046.57
10.72_577.5199m/z	1.42173e+07	1.67131e+07	1.62011e+07	2.57632e+07	2.04242e+07	1.12438e+07	1.67569e+07	1.4126e+07	1.23974e+07	2.55201e+07	1.72916e+07	1.86837e+07	1.41415e+07	1.4129e+07	1.17439e+07	1.57601e+07	2.16435e+07	1.74888e+07	1.94423e+07	2.84401e+07	1.74477e+07	1.66925e+07	1.9299e+07	1.50928e+07	3.50581e+07	2.49788e+07	3.08416e+07	1.77133e+07	3.10921e+07	2.27066e+07	1.35101e+07	1.61784e+07	1.16804e+07	2.07228e+07	2.89209e+07	1.45956e+07	1.41723e+07	2.65213e+07	2.76976e+07	1.71636e+07	1.47294e+07	3.1e+07	1.50842e+07	1.46964e+07	1.93733e+07	1.43678e+07	2.49574e+07	1.72135e+07	2.01645e+07
10.72_856.7549n	4.35249e+08	4.73661e+08	5.21958e+08	5.65965e+08	5.73203e+08	3.56922e+08	5.59477e+08	3.68846e+08	3.8044e+08	8.00094e+08	4.39108e+08	4.48598e+08	4.67172e+08	4.29511e+08	3.4848e+08	468899920	6.98304e+08	5.85371e+08	6.24461e+08	7.04007e+08	6.09903e+08	5.64444e+08	6.25795e+08	4.77074e+08	9.0826e+08	6.24891e+08	9.97516e+08	4.99978e+08	9.44233e+08	7.52276e+08	3.98761e+08	5.1592e+08	3.28094e+08	6.29516e+08	6.84714e+08	4.73382e+08	4.70977e+08	6.38683e+08	7.76793e+08	5.71606e+08	5.33084e+08	7.94945e+08	5.09157e+08	4.204e+08	6.43226e+08	4.83273e+08	7.38287e+08	5.16488e+08	6.59174e+08
10.72_857.0428n	2.01287e+06	2.99926e+06	3.9625e+06	4.51421e+06	4.68054e+06	1.36001e+06	3.81486e+06	1.30595e+06	1.57388e+06	6.90778e+06	1.90637e+06	2.41936e+06	2.31111e+06	1.86409e+06	1.26477e+06	2.21036e+06	6.52952e+06	5.0587e+06	3.67959e+06	6.27131e+06	5.20312e+06	3.90908e+06	5.79879e+06	2.42804e+06	1.61321e+07	5.13184e+06	2.10434e+07	3.44112e+06	1.81336e+07	1.0524e+07	1.72344e+06	3.50412e+06	1.04684e+06	5.90097e+06	5.27437e+06	2.33208e+06	2.26949e+06	4.81443e+06	6.94608e+06	3.94915e+06	3.66583e+06	7.14901e+06	2.75446e+06	1.71456e+06	5.32261e+06	2.70125e+06	6.62565e+06	2.49037e+06	5.32204e+06
10.72_858.3932m/z	188353	267978	208508	393851	274841	152849	352061	148877	190919	406937	231248	267268	266915	219293	167774	179011	404454	295754	286231	310522	317346	303322	294322	187920	580347	198791	519894	305108	540867	426857	177310	241792	171803	439070	270657	274572	301668	412430	391024	278167	200056	440255	260893	234214	344007	214316	439664	325048	281243
10.73_573.4886m/z	89914.6	97770.8	69577	118017	141294	57207.3	95022.4	75667.9	54959.9	114687	76001.1	88021.3	60080.9	62815.4	57812	78148.3	76550.2	62307.1	92135.3	126589	64233.7	77447.6	62987.9	64806.5	102373	88944.2	85103.6	79017.6	100462	81357.2	71603.4	85575.9	54052.2	118294	154063	75906.7	67672.9	132294	139573	84388.6	61536.5	114169	73248.7	77172.6	68362.3	65959.1	93586.8	75822.4	76249.2
10.73_601.6478m/z	22287.9	38449.9	41283.3	19074.2	31572.6	5813.33	35500.6	4798.19	7119.51	98339.1	12306	11159.9	49288.6	11405	1093.6	2782.05	22801.8	23548.7	27611.9	118786	49886.8	57958.8	23907.3	26690.7	82487.8	15449.3	190114	29230.5	83550.3	44929.1	16395.9	39935.1	3019.12	43555.8	34071	26031.2	39716.9	39726.8	60884.9	13718.5	16315.9	35459.9	8519.81	1240.6	29872.9	8410.11	19390.8	14519.9	77458.4
10.73_858.5699m/z	113100	206267	201512	223727	233018	84048.2	202775	147968	83108.1	155602	106957	112163	90465.4	90598.1	68961	43747.1	124349	69639.3	99121.3	254436	217078	372016	208563	197541	188360	111848	163076	109225	157428	207651	104963	107869	119250	318928	168044	112369	110330	143508	154818	89922.2	66983.1	202821	80528	107627	114543	65139.8	104557	106586	198121
10.74_916.9346m/z	498639	436089	469624	443190	470401	366091	609272	360906	587094	525503	526177	440514	420653	412568	464063	537859	537383	636107	488659	673608	378090	461483	616611	398113	582235	616848	827254	533283	436758	619884	404949	623375	382460	598934	615798	515018	589201	590872	540895	776171	516376	567977	535462	386883	630669	308123	724057	471052	543060
10.75_875.8793m/z	896159	1.12661e+06	997493	1.15506e+06	1.28636e+06	321785	1.38243e+06	1.04616e+06	858897	1.2172e+06	951209	863722	862676	812193	487061	522265	821577	583822	344397	1.64402e+06	1.10675e+06	1.05306e+06	1.99538e+06	1.08719e+06	2.63979e+06	1.74999e+06	1.90994e+06	804048	1.17723e+06	988550	735691	1.14882e+06	536815	1.79098e+06	1.41982e+06	960747	1.14157e+06	1.41841e+06	1.54435e+06	1.34274e+06	922639	1.85947e+06	508917	564417	1.01087e+06	257973	699482	441832	1.09392e+06
10.77_976.8383m/z	98686.3	136650	84008.6	152450	112341	66018.8	67807.9	73035.4	70496.7	149509	111711	71232.4	73326.8	100404	69519.9	93207.4	131467	99502.9	130232	71273.7	147462	45711	92760.9	67593.3	158780	95547.7	89797.5	115474	78977.8	104228	118150	250814	48322.8	55675.9	108611	119598	61365.8	244541	93503.7	96644.4	82976	156853	124267	68311.2	85635.4	58705.6	123933	127313	90710.1
10.78_955.7709m/z	216057	272189	181555	298863	255602	143164	238965	164281	214808	259438	174812	161089	249367	163324	160172	202124	266936	195954	267558	210827	286853	151335	196060	178691	301025	200121	198164	213351	191621	194600	278858	427737	170052	208750	222036	225471	155079	298734	270931	223898	167970	266690	221556	156458	160746	167654	230039	249274	176692
10.78_992.8658m/z	82792.4	84206.5	78070	135715	110153	67291	75371.3	56332.4	75925.4	69555.9	58687.1	72291.7	86908.4	48000	47461.9	77408.7	131547	69229.6	113226	89207.8	112715	51561.1	71323.1	63354.4	105083	98542.5	63545.7	97000.6	72337.6	82182.8	104223	186109	52014.5	50698.9	76903.1	93124.8	50326.7	166464	99517.1	63053.7	54556.9	96238.5	101058	66052.5	83416.2	67239.2	100192	94030.7	62633.5
10.79_319.1326m/z	11953.6	9726.58	11658.6	11790.3	8587.08	14654.2	10566.1	15522.1	17977.8	10715.7	10078.4	11831.5	12066.3	11278.4	15469.2	16162.4	13396.3	13718.8	14711.8	15127.4	14987.9	16122.1	14551.1	14389	17378.1	9609.82	15465	17484.6	19900.3	18836.2	12545.2	8043.87	15269.8	12793.3	12363.9	12388.7	11300.4	11525.3	13999	12057	12600.1	8444.35	13258.2	16623.1	16348	18290.1	11158.4	17054.4	14261.2
10.80_623.3070m/z	96600.6	100889	100706	52520.6	93157.4	98506.2	88950.7	106546	92677.8	62693.5	70960	104335	78754.2	93431.2	94292.4	85731.7	92856.6	83883.3	77729.4	79093.3	76132	83088.3	72985.7	83068.9	73999.8	97041.6	70001.1	75948.2	73895.9	70007.7	86871.2	95086.3	94545.6	81310	76933.6	91119	79232	75042.5	97111.4	84857.6	97492.4	69535.3	86088.3	87051	92987	85164	85850.4	93947.9	80175.6
10.81_1034.8931m/z	74413.9	55458.4	53932.4	59570.4	65349.2	66367.6	65675.2	74136.4	89998.2	44115.6	52934.1	65818.9	78190.9	68354.6	100835	72604.2	81688.9	66231	79639.2	62693.8	74890.2	86816.7	80373.8	79190	63321	92414.3	79265.4	77075.2	77104.5	106645	78520	66378.3	69513.5	57433.3	58793.2	66115.9	80071.9	55998.2	54259.1	50907	62588.6	65284.4	63463.2	69384.1	85498.5	93234.3	71701.9	73997.8	83016.9
10.83_848.8515m/z	56558.1	52888.2	45744.1	65838	61471.4	50294	56939.8	69209.2	53521.7	57940.8	63471.8	58596	46812.1	50873	44425.6	51890.4	58652.8	43826.1	44328	65327.8	53798.4	40373.8	63627.8	52762.3	69180.8	65500	56667.9	48622.7	45545.8	46996.3	57463.4	47823	51668.3	52344.6	74024.5	55714.9	64306.2	62133.1	66972.1	65239.9	56398	60384.3	42265.6	61107.7	49189.9	45835.3	48386.5	68824.7	62044.2
10.83_934.8003n	3.63638e+06	4.1502e+06	3.1787e+06	5.19408e+06	3.80554e+06	2.35613e+06	3.80541e+06	2.28463e+06	2.41663e+06	4.7213e+06	3.0111e+06	2.14238e+06	4.4745e+06	3.01384e+06	2.35141e+06	3.57016e+06	4.02249e+06	3.96715e+06	3.78163e+06	3.50311e+06	5.05805e+06	2.62694e+06	3.56593e+06	2.21996e+06	5.29289e+06	3.60525e+06	4.31102e+06	3.16149e+06	3.3444e+06	3.23899e+06	3.2029e+06	6.09931e+06	1.62115e+06	4.4962e+06	3.97316e+06	3.98743e+06	2.70906e+06	5.55256e+06	5.30495e+06	2.72524e+06	2.51681e+06	5.40995e+06	3.52295e+06	2.26091e+06	3.23651e+06	2.41634e+06	4.90491e+06	3.95714e+06	3.17865e+06
10.84_970.7130n	202001	168553	147647	129355	174069	170448	152593	158368	184414	129366	145213	191037	163120	165604	184361	162630	192426	152335	161163	141474	144956	157387	151970	163033	130573	156432	135067	145942	131494	134142	192178	184151	195119	132752	140736	154772	177340	160690	159620	134007	165925	161154	168797	188407	171855	181394	125097	171274	141745
10.86_261.1471m/z	49087.6	47100.4	42947.1	40700.9	44507.7	45733.8	44437.9	49900.5	49750.1	38685.5	42580.5	50793.7	46548.3	44871.8	42499.3	47263.1	43493.4	45405.6	46026.4	45312.4	49731.2	46677.3	44565	48053.4	43203.7	48306.4	44594.9	44783.6	40870.4	44289.1	43542.6	42568.9	47550.1	43830.7	42111	45152.2	50472.6	42385.1	51137.6	42441.1	47019	46063.3	45808	48481.4	44896.8	45666.6	48776.9	50583.9	44782.3
10.86_344.3046n	40823.5	37504.9	34069.4	36938.5	38274.9	35173.9	33104.5	39538.9	38069.6	34630.1	36043.3	40021.1	36903.2	38191.6	37698.3	34817.9	40294.8	34571.7	33869.2	35152.3	33771.6	35718	36060.6	41967.1	36044.6	42760.2	33578.7	39733.6	34403	40912.8	34918.2	34909.4	36532	37062.4	36600.3	36715.5	38929	34661.9	33047.9	39717.4	40915.9	35321.9	32843.4	42675.3	38708.8	40553	39271.9	39742	40792
10.87_133.1002m/z	7489.49	7638.17	6865.67	6776.68	7831.6	6899.75	5867.14	4982.71	7485.62	6674.01	5734.13	6589.69	7499.57	7053.55	5682.6	8107.76	4984.1	7322.65	8486.56	7567.77	8621.66	5859.42	9236.36	8170.63	6332.48	7185.09	7810.96	9650.01	5854.32	6400.93	5964.33	7163.14	7744.49	7740.61	6215	9062.99	6449.76	7148.85	6523.72	5333.05	5693.39	5586.26	5045.98	7513.78	6394.88	9426.05	7382.95	8089.64	8956.72
10.87_257.2257m/z	36170.5	35870.8	29119.7	49913.7	37825.8	38108.1	35389.6	36174.9	37113.4	35634.4	31410.8	42875.9	34545.5	34301.3	34572.2	34324.7	36073	40725.9	38924.6	39606.5	39094.6	38240.1	52125.4	49706.2	41773.5	48763.6	48765.9	49813.7	50352.2	54938.2	30618.6	44329.3	34090.1	47927.4	37417.7	33153.6	37386.7	35697.4	39724.9	32224.2	39832.5	39440.6	35655	35998.6	40447	37797.9	44888.5	47826	40831.9
10.88_177.1264m/z	10426.8	11654.9	8467.59	9805.43	11201.7	8846.89	12394.5	13487.6	15908.9	10082.5	11197.6	9468.52	12150.7	10820.4	11659.2	9772.54	9638.6	10479.9	10644.9	8474.98	8733.32	10249.6	8278.94	12197.5	11802	11620	11276.4	10799.9	11749.7	13261	11882	12690.8	13038.3	11773.4	8882.76	10396.2	14170.2	11226.5	12649.9	12199.2	13013.5	9226.25	8450.58	10749.4	9001.4	10489.9	9934.02	8590.59	9713.3
10.88_275.1632m/z	45466.5	40304.3	34516.2	33850.7	35262.1	46354.4	36757.5	42380.9	42753.9	33720.9	35000.6	44434.8	43031.4	40285.6	47926.3	40233.7	33140.9	44124.9	38923	36992.3	38904.7	40095.6	45499.1	48252.7	35815.3	40231.1	44824.3	42492.2	41468.8	40214.9	39091.9	36980.6	45577.9	36927.4	35547.9	42187.8	42765.3	35417.9	35037.4	37962.6	38043.8	35494.3	39355.4	43588.8	42240.6	48726.8	39720	51738	44628
10.88_368.4247m/z	41473.5	28661.1	32676.5	30171.9	37037.3	35256.7	26525.9	31386.5	33346.3	27365.9	24469.9	28265.5	31050.8	29397.2	22410.3	36293.2	28484.5	25279.1	25935.7	26866	19184.5	29266.5	26640.3	27463.9	31716.5	35549.5	30972.8	26871.8	29827.4	27318	24738.2	34350.4	33132.7	37443.4	33139.3	21814.8	39113.8	22998.3	31660	33150.9	30761.1	26635.5	29034.9	24377.9	31078.4	29294.4	25654.6	26072.2	24422.7
10.91_1008.8969m/z	340311	354005	314462	351182	345522	225225	358423	239283	304521	297793	275312	261930	365488	298781	278684	336819	347313	375710	358036	286015	430209	257587	298182	218195	371447	278589	322307	296271	278864	307569	352193	477190	221726	331180	301253	389038	290610	414672	378266	286362	294498	398146	387483	274152	292613	280882	359184	357097	289196
10.91_1102.8150n	117072	106625	163506	189954	162251	99249.1	126154	83358.3	104334	168719	104598	84775.8	121427	91282	91047.5	122613	155671	132422	186838	95758.9	197379	79951.3	100848	68293.7	193634	101161	123037	106145	119000	155632	193545	266457	87847.8	101203	125614	192166	110234	217898	174285	120415	109742	223161	184747	102289	99861.3	127743	209313	143922	121864
10.91_625.5200m/z	99045.1	93805.4	103554	136288	116782	74289.1	92012.3	64296.6	76310.7	127962	78615.9	69676.1	105909	75357.5	71982.5	95378.6	106692	113744	140035	86413.7	171714	74617.1	100237	75078.5	127761	94199	96797.1	96680.2	95827	121745	111680	162223	65619.8	90937.8	101306	128516	87047.7	159814	126125	103026	94256	147770	127511	71919.7	86303.9	82020.7	142105	126435	93954.5
10.91_842.8309m/z	14388.9	11580.8	9220.75	14530.6	8541.11	14244.2	14723.7	16370.9	17345.8	15026	13982.2	15574.1	10802.4	10172	10165	17737.9	16436.4	16945.7	22026.3	32218.6	31934.5	21716.8	33524.4	33382.4	40919	45652.2	31420.5	56146.9	32464.5	32390.4	13909	9682.22	14650.8	16218.7	12979.2	11064.3	19051.1	19518.5	18826.8	17544.4	10114.3	11015.4	13825.3	12157.7	13527.8	16847	25117	29748.4	31811.9
10.91_908.7859n	4.51008e+06	4.7179e+06	4.27991e+06	6.78988e+06	5.65756e+06	2.19081e+06	4.31538e+06	2.73002e+06	3.101e+06	6.86137e+06	3.22774e+06	2.66194e+06	4.97317e+06	3.23181e+06	2.5428e+06	4.23548e+06	5.70337e+06	5.18599e+06	7.07631e+06	3.89846e+06	9.92838e+06	2.83454e+06	5.32593e+06	2.65381e+06	7.2868e+06	3863774	4.2324e+06	4.3617e+06	4.48319e+06	5.62573e+06	4.85451e+06	8.52285e+06	2.04935e+06	4.12771e+06	4.84126e+06	6.90946e+06	3.6882e+06	8.6275e+06	7.57868e+06	3.78779e+06	4.22737e+06	7.56374e+06	6.22217e+06	2.50518e+06	3.55582e+06	3.60234e+06	7.50958e+06	5.66269e+06	4.11399e+06
10.91_985.8686n	1.31495e+06	1.25217e+06	1.41201e+06	1.85621e+06	1.40402e+06	627396	1.28778e+06	717316	882338	1.83782e+06	798548	692514	1.25733e+06	924237	718813	1.28696e+06	1.60537e+06	1.59831e+06	1.89814e+06	1.07008e+06	2.45879e+06	780499	1.34064e+06	746393	1.85074e+06	903716	1.09921e+06	1.07427e+06	936044	1.39227e+06	1.65445e+06	2.64626e+06	524757	1.03779e+06	1.384e+06	1.92235e+06	927316	1.97454e+06	1.77634e+06	1.17654e+06	1.07558e+06	2.18227e+06	1.87127e+06	712229	947647	1.03089e+06	1.78903e+06	1.57116e+06	1.09074e+06
10.93_926.9229m/z	101832	95192	117428	152172	133357	47703.1	131743	58412.8	63035.7	148861	80937.7	64583.5	120992	66270.1	81465.8	101127	112959	109486	160231	68432.5	188827	62311.6	103718	52101	183089	120999	109637	93827.9	82084.1	101140	118596	256447	38977.9	115151	133867	152993	73366.8	130068	199452	125797	108377	133080	164391	61739.6	72583.6	80980.5	144200	143291	104217
10.97_860.4090m/z	125260	121344	131529	273488	247496	123321	160477	160508	162136	334438	234257	253486	138573	99006.5	70860.4	71308.3	226342	87479.8	194738	342802	292587	240437	443397	197724	525516	519438	385772	152856	435219	382170	87257.9	110251	182859	201798	394116	170553	198635	321834	195093	219340	129195	210729	125544	62326	145781	107071	257134	168243	240041
10.97_877.0897m/z	378019	422065	460358	1.31134e+06	1.00539e+06	439668	529259	351149	344221	1.05647e+06	434518	777058	440504	377664	306825	448325	1.0397e+06	480257	871183	1.11743e+06	1.15935e+06	575844	1.73995e+06	688765	1.83326e+06	1.39646e+06	1.48001e+06	702962	2.34242e+06	1.36962e+06	334097	342559	353647	521894	946506	431877	365870	920987	774070	434167	441380	1.69307e+06	391373	395390	715461	433600	1.17471e+06	787532	971259
10.97_906.4314m/z	45849.3	33713.5	32306.6	48057.2	82642.5	51270.6	33603.3	47227.6	50875.8	102282	46897.8	71748.7	90506	38178.8	38139.8	33790.7	92530.7	60316.7	64511.5	48104.5	48274.5	58705.1	47464.1	38220.5	28924.2	51013.7	84546.3	53034.3	73579.5	49807.7	45959.6	72005.4	39508.7	74152.9	60738.3	98016.9	39538.2	38259.1	67145.2	86164.3	61982.2	68871.2	57822.6	38880.8	46332.4	45932.6	53238.8	38397.5	70280.1
10.98_918.9500m/z	1.32312e+06	1.28207e+06	1.4117e+06	1.95486e+06	1.92688e+06	1.49233e+06	1.52853e+06	1.0906e+06	1.53881e+06	1.61775e+06	1.81527e+06	1.9672e+06	1.33084e+06	1.35488e+06	1.31779e+06	1.53962e+06	1.99701e+06	1.61071e+06	2.13837e+06	2.23197e+06	2.2309e+06	1.81741e+06	2.65096e+06	1.81685e+06	3.2697e+06	3.15853e+06	3.12203e+06	2.24268e+06	2.62408e+06	2.97437e+06	1.38069e+06	1.27983e+06	1.18967e+06	1.53497e+06	2.04527e+06	1.49406e+06	1.39846e+06	1.95594e+06	1.84635e+06	1.58317e+06	1.40512e+06	1.98469e+06	1.33297e+06	1.58823e+06	1.89951e+06	1.27187e+06	2.45104e+06	2.58562e+06	2.60141e+06
11.09_1151.9545n	259404	196784	186717	163092	208793	235287	245241	306006	326880	236378	295200	297387	280208	269050	298183	295886	269272	287590	255455	157985	235902	223598	226697	339998	229054	297205	236830	279829	210770	279387	256486	201709	248076	243426	209737	288279	311907	236241	257861	299589	292187	225884	272429	316555	284208	302221	241251	264686	253945
11.09_1165.0323m/z	267074	223792	199206	176981	220666	241824	282318	304926	278682	268888	284007	279478	259554	270184	265009	262228	275444	290842	305052	232798	265689	217677	234695	284696	318736	324685	349997	307028	280315	271548	275101	227417	248594	259897	236705	284022	266091	289587	257257	271381	275268	226933	225978	254928	239874	290785	250360	273395	263513
11.09_989.7049m/z	48928	42756.4	48393.3	34275	62129.2	50052.5	50317.9	47187.6	53261.4	40678.3	50861	56556.9	56565.9	53785.1	58490.5	47195.1	55087.8	59934.5	50102.5	56413	46070.7	48756.4	42945.2	58211.4	42703	55554.1	50131.8	48765.7	35986	40588.7	60036.6	47432.4	56880.7	41766.4	41921.8	47012.7	53741.9	52292.8	57761.3	45739.2	58694.3	45355.1	53739.4	57853.6	57453.6	58013.6	47491.4	49638.6	39963.7
11.16_337.0679m/z	59395.2	100389	69724.6	83710.7	88125.2	87049.6	103869	88630	96749.4	59415.7	78972.7	93001.2	95759.8	111560	99117.9	103908	77392.6	97327	86740.5	82780.4	84550.5	87454.6	99266.6	102397	93145.9	83962	99749.2	82479.3	78465.8	84715.2	100102	97272.2	118641	70383.2	75442.6	97394.7	86594.7	84140	82731	90302.4	87192.9	77450.3	112129	86150.8	92679.6	71338.6	92047	92998.2	84944.2
11.21_906.4341m/z	21996.8	30894.2	54727.8	34690.2	70306.4	153837	69733.9	69189.8	26428.4	30129.7	40483.6	20593.8	37440	46216.8	39858	52055	79370.9	11476.4	21289.9	29572.5	21728.9	27213	22566.6	32578	48440.2	55862.2	34418.1	92200.5	49193.6	60576.2	28637	46492.7	42583.6	117049	103232	106519	69115.9	22395.5	35727.1	25456.6	47412.7	121075	74193.9	71686.2	34025.9	34225.2	21605.5	18224.7	11433
11.22_1080.8312n	739132	695055	753681	967585	1.23346e+06	603746	914335	550120	683281	1.07148e+06	780797	840210	719272	518025	559247	906848	1.08216e+06	783115	1.03018e+06	1.16742e+06	1.20079e+06	673668	1.09495e+06	686106	998842	1.05904e+06	971561	798221	911263	974341	585112	754120	674734	753728	1.20683e+06	798296	768786	923305	1.05365e+06	827359	828541	1.27695e+06	771565	646414	878179	772235	1.2268e+06	858008	1.0202e+06
11.22_1747.5599n	162693	60489.9	148390	760504	552890	58029.8	219097	50187.5	99830.5	620905	150137	453055	78875.5	36034.7	67985.9	431504	771135	228124	845292	1.29622e+06	1.51128e+06	241127	2.22107e+06	284017	1.16036e+06	2.45597e+06	1.69752e+06	1.10844e+06	1.51696e+06	2.32699e+06	32030.1	68371.5	113848	156068	423641	135445	125883	368196	559232	232756	132472	773961	116922	229485	657222	82118.5	881635	1.02035e+06	1.11187e+06
11.22_605.5513m/z	1.84816e+06	1.58377e+06	1.70404e+06	2.78915e+06	3.21998e+06	1.36801e+06	2.15249e+06	1.21187e+06	1.5498e+06	3.14952e+06	1.87021e+06	2.22297e+06	1.64424e+06	1.06305e+06	1.21617e+06	2.2048e+06	2.70026e+06	1.81811e+06	3.0213e+06	3.44094e+06	3.64859e+06	1.76331e+06	3.70204e+06	1.96797e+06	3.00107e+06	3.78636e+06	3.35124e+06	2.61854e+06	3.09117e+06	3.43729e+06	1.31737e+06	1.69466e+06	1.52395e+06	1.74147e+06	3.20852e+06	1.92507e+06	1.76787e+06	2.48206e+06	2.87785e+06	2.0682e+06	1.82033e+06	3.50102e+06	1.60066e+06	1.48489e+06	2.22554e+06	1.84909e+06	3.6071e+06	2.85488e+06	3.22641e+06
11.22_904.9283m/z	172672	120669	232460	300351	367216	147070	295815	143670	125752	255801	244983	217926	180768	131026	167422	207210	334147	234779	293080	372291	353921	87874.1	344632	204479	237002	275802	388896	272609	227581	277547	132950	252365	143095	184594	440664	214686	184552	286588	326553	272685	200976	311727	235666	130075	288074	117051	386754	210471	310289
11.22_909.7900m/z	4.32842e+06	3.80841e+06	4.29043e+06	6.01222e+06	7.65206e+06	3.23802e+06	5.31136e+06	2.82503e+06	3.61428e+06	6.9216e+06	4.62844e+06	5.10205e+06	4.117e+06	2.67844e+06	3.02164e+06	5.18305e+06	6.22012e+06	4.32553e+06	6.40628e+06	7.05296e+06	7.65879e+06	3.98671e+06	6.86508e+06	4.22588e+06	6.16752e+06	6.79702e+06	6.17063e+06	4.73325e+06	5.7121e+06	6.12828e+06	3.15352e+06	4.14443e+06	3.57066e+06	4.1838e+06	7.49826e+06	4.64351e+06	4.07319e+06	5.90932e+06	6.15921e+06	4.75822e+06	4.46111e+06	8.12085e+06	4.08672e+06	3.35381e+06	5.35238e+06	4.392e+06	7.57093e+06	5.52681e+06	6.74435e+06
11.22_963.8842n	6.62916e+06	5.98818e+06	6.42929e+06	8.13734e+06	1.02923e+07	5.34451e+06	8.14574e+06	4.79982e+06	5.79964e+06	1.02808e+07	7.10244e+06	7.45827e+06	6.15537e+06	4.63888e+06	5.0328e+06	8.10958e+06	9.10015e+06	6.36166e+06	9.31061e+06	1.01632e+07	1.02092e+07	5.94439e+06	9.6454e+06	6.31272e+06	8.70538e+06	9.2025e+06	8.72267e+06	7.05463e+06	8.0697e+06	8.27641e+06	5.27027e+06	6.32356e+06	5.80504e+06	6.05578e+06	1.07636e+07	6.84327e+06	6.33622e+06	8.46292e+06	8.60644e+06	7.06606e+06	7.1333e+06	1.13907e+07	6.37246e+06	5.61189e+06	7.61136e+06	6.62211e+06	1.0617e+07	7.46897e+06	9.24308e+06
11.23_903.8281n	2.59537e+07	22462313	2.48987e+07	4.01691e+07	5.04023e+07	1.97341e+07	3.27729e+07	1.69883e+07	2.10194e+07	4.68018e+07	2.80023e+07	3.02823e+07	2.42876e+07	1.56772e+07	1.79799e+07	3.18411e+07	4.02355e+07	2.58441e+07	4.20282e+07	4.60409e+07	5.06958e+07	2.38982e+07	4.67125e+07	2.58956e+07	3.92953e+07	4.36488e+07	4.13269e+07	3.0586e+07	3.8164e+07	4.12365e+07	1.86222e+07	2.45698e+07	2.0814e+07	2.51896e+07	4.99313e+07	2.7147e+07	2.46031e+07	3.63863e+07	3.95177e+07	2.91422e+07	2.78335e+07	5.77773e+07	2.41367e+07	2.05485e+07	3.27019e+07	2.50459e+07	5.08991e+07	3.44307e+07	4.22291e+07
11.31_662.7170m/z	524324	593344	448946	556767	381795	655060	481781	573110	610922	533274	436315	566706	600327	633246	649477	613360	663982	387889	807735	924791	778964	1.02646e+06	961143	931783	1.23964e+06	1.19853e+06	1.12355e+06	1.69895e+06	1.54438e+06	1.51205e+06	727013	671836	627477	716545	742057	534840	598644	576735	500463	570173	574016	567914	551037	590769	707151	639625	603331	602970	743341
11.44_159.0147m/z	11740.7	9228.73	10960.9	8079.52	11537	10710.5	10427.6	9464.12	12179.7	9372.03	8986.62	12237.1	10608.3	9160.44	12522	9061.35	9985.41	10856.4	8298.21	13199.8	14213.9	13471.5	9417.14	12602.5	13254.9	14806.8	12349.3	12576.3	9662.24	13975.8	11897.2	7286.8	14121.9	11681.1	12846.4	11013.4	12572.1	8177.64	10082.7	10669.6	9966.14	10911.9	12151.4	9008.01	11733	12688	12316.7	13648.1	7081.52
11.51_636.5451m/z	14458.8	12968.6	13269.1	7857.61	16924.8	15081.6	18086.6	13443.9	13711.2	13731.2	11911.1	14707.7	14563.6	14267.4	15167.1	15511.2	11566.5	17365.3	15231.5	13484.2	13568.6	14392.2	14811.8	9992.74	11142	12026.3	9998.34	11704.1	12314.6	10683.3	17307.8	12182.4	16912.5	11392.9	12332.1	16045.1	10537.5	16089.5	10887.8	16849.6	16380	14207.9	15476.6	13991.5	15094.9	14795.1	11612.1	15426.4	14911.3
11.52_251.0463m/z	13117.1	11496.8	8694.17	7203.25	11339.7	9604.6	9423.97	13053.7	15362.2	8432.49	10837.6	10433.5	14408	11876.8	12470.8	10809.7	12786	10378.2	10555.2	12440.3	14024.6	8421.68	14290.5	11131.2	12113.5	8660.46	13128.4	14732.4	15033.4	14432.2	9847.14	11606.9	9970.59	10346.6	10007.2	12591.1	12721.4	13679.7	10513.1	13405	15636.3	11057.7	11729.5	13843.1	14767.1	10216.9	13320	11454	10641
11.79_1207.0412m/z	580020	603057	456182	428509	516770	526815	577564	576231	603587	524426	596598	626181	630187	617549	599601	549800	561235	552819	567085	503216	564283	568060	545829	624045	582106	606995	536235	544177	502709	489013	628057	514711	606241	518699	523358	572014	620105	612992	595296	564432	625797	554929	598131	526976	542705	563443	468214	599071	517567
11.99_985.7710m/z	55004.9	51048.8	45466.5	45612.1	54357.1	51759.5	59565	47201.5	59198.4	54866.4	51883.4	66441.2	61659	63445.5	56507.1	53412.6	58897.2	54452	57328.4	67340.7	58012.9	57527.3	52655.5	55371.8	53762.6	55086.3	53896.3	57541.4	50177.4	73462.7	53883.5	56019.7	54356.7	56898.3	46743.5	56953.8	51130.7	55533.3	60818.6	54049.4	58940	57562.4	56297.3	52222.9	57985.8	69228.1	52603.5	59740.7	57824.9
12.00_269.1884m/z	5267.06	3644.69	4162.8	3547.18	4752.16	4407.99	2670.77	4379.91	5722.51	4003.86	3452.61	4120.19	4218.85	3321.04	3725.79	3955.01	4208.38	5060.15	3450.17	5615.38	6038.99	6299.8	3647.03	3281.82	3022.45	2785.76	3746.83	2209.59	3192.44	4717.29	7203.55	3968.62	3737.41	4848.7	4600.66	5210.81	4298.35	4396.87	4644.38	5319.4	4205.75	4494.88	4717.76	4626.26	4950.01	3714.36	2926.53	4036.2	3515.16
12.05_841.8122m/z	134142	106941	104140	115627	112844	121373	107393	125901	115821	115391	106457	106678	121423	118899	119158	113672	118004	119090	100166	106072	99656.2	98050.7	110542	114097	97252.7	103667	103461	105220	95655.2	100538	108697	113055	129025	103426	106781	112377	102028	112361	116811	127103	124821	113041	125431	109567	108846	146511	115257	118290	110484
12.16_1042.9673m/z	64064.4	59974.9	60904	44168	47592.8	68760.3	61007	50753.2	71872.4	70413.5	70749.1	67867.5	79486.5	79411.7	66804.8	75300.1	92323.7	71641.4	79564.6	63603.6	64124.1	74391	72871.9	60465.4	71779.5	77672.1	85101.4	78539.7	65094.8	80455.9	51533.4	47128.4	65129.7	64107.5	45939.4	66277.9	71314.3	74639.9	58394	77932	88975.6	64212.4	86242.6	49251.4	67009.2	82731.6	54141.3	74282.4	71828.7
12.17_510.3238m/z	101539	101183	102433	89858.9	108127	107428	104271	97384.2	118844	103642	106606	104717	109260	108263	102444	104170	106704	106026	110832	103205	99515.6	106135	99358.3	109487	97855.8	101825	99279.5	98540.1	99079.7	101499	111849	100617	114778	97127	96976.7	108762	102019	100912	101872	108574	102987	95007.4	109161	106456	104157	102480	99975.2	112483	107284
12.18_794.7185m/z	1.01557e+06	920047	845738	824768	896222	953337	912880	930031	975138	880918	911971	980162	939147	941005	912273	950330	911826	923891	939730	870360	858482	977344	913127	899038	900117	879636	875426	861842	893786	845430	950147	867527	1.00058e+06	844509	920092	907704	964253	857311	944902	934432	955439	824187	958003	935466	907365	949838	860813	963293	901627
12.40_1006.9738m/z	145527	100247	108442	94714.3	109936	138005	118325	121908	142500	122350	126529	145431	132852	134370	134548	145083	136217	139545	131546	129079	115075	127890	118182	148698	112234	140910	124109	97995.9	111121	129150	125562	112725	111361	116035	112267	122316	147502	120540	111982	127381	134371	135202	124888	144007	146940	131126	127526	111581	130177
12.40_277.2139m/z	8420.23	9970.62	8203.15	9038.16	9295.72	9667.5	7790.51	9594.05	9640.89	9708.07	8819.46	10585.7	9311.02	11681.7	10143.9	8023.97	9915.19	9740.68	9708.62	9594.81	9413.87	9724.31	7470.31	7138.47	8173.13	7384.61	9000.79	7337.74	7046.01	6523.91	9413.81	7887.32	10577.8	7533.5	8795.12	10434.8	8674.91	9327.85	7626.71	9048.6	10002.1	9690.73	9877.19	8886.84	9516.27	9038.92	11488.2	8210.84	10131.1
12.52_656.5056m/z	37329.6	33205.6	31386.7	29285.7	30936.3	33893.5	26684.4	30614.9	32565.4	23695.3	29034.1	29534.6	29910.7	32708.9	32556.5	31629.3	29506.1	31465.8	29146.5	28928.6	24826.2	39111.1	34553	32210.6	28628.2	27625.4	33634.9	34014	31936.4	32118.1	30802.9	38450.7	32928.3	31003.5	31209.2	29523.2	34672.1	28584.3	32923.5	33530.3	31027.4	28733.4	32416.2	29570.8	30190.6	34665.3	29324.8	27888.4	32148.5
12.53_425.2685m/z	21955.6	21503.7	20620.5	24515.9	22959.3	29266	28545.7	21986.7	23861.2	22005.6	27785.6	26834.1	27976.6	22169.6	29432.3	23557.6	25158.4	20250.1	28748.5	24908.6	28970.4	21084.2	24379.7	27174.4	22893.5	24329.8	25012.4	26290.8	21865.6	22294.1	24610.3	24424.4	24306	21049.5	21636.4	24806.1	30643.4	22789.8	26154.1	25993.8	29040.5	22608.4	27536.7	24161.5	30722.2	28775.2	28391.9	30752.2	25841.1
12.74_1001.8300m/z	44163	66134.1	50485.3	51109	51191.6	62538.4	48693.6	50737.7	67766	62666.5	57934.8	60314	68706.4	47622.8	60048.8	58542.9	67489.4	58497.1	57609.6	45284.8	58670.5	59035	63387.4	56214.6	55354.8	59869.3	46275.9	64830.8	47256.8	48076.8	59166.8	56984.3	66751.6	55171	62773.9	65892.8	54329.3	58743.7	62037.1	55598.3	52322.1	46631.1	58444.3	61567	54840.1	58588.8	50432	48260.4	56736.7
12.88_294.2454m/z	11809.1	9578.86	10736.2	7781.76	9935.85	9875.85	8300.83	11099.4	11291.5	8288.93	9186.97	8271.63	9709.95	11598.1	11100	13544.6	10970.5	14544.5	13355.9	13170.7	14619.7	13738.6	13573	11492	13121.9	14128.7	9845.14	8915.12	8099.85	11515.4	8376.08	11067.4	10387.7	9444.83	7753.66	10033.9	11063.1	9146.1	9194.77	9838.28	12406.6	11400.1	11657.4	11988.8	11469.7	11996.3	11669.3	12332.9	13525.6
13.23_400.2982m/z	33061.1	31133.8	40664.2	34752.4	38139.2	32403.4	34788.7	40083.1	38165.3	34298.8	25890.3	40642.6	40438.4	42301.4	43396.9	44240.1	40883.8	39894.1	36818.9	30720.4	32948.4	32663.7	33220.2	33431.7	30721.3	34370.7	31068.6	34805.2	29234.8	33041	34331.1	34857.5	37567.1	33926.8	34274.6	29586.5	39373	34648.4	36378	34778.5	39243.2	39626.6	44687.4	40632.1	39994.3	40461.8	32362	31718.7	35981.5
13.35_717.3336m/z	285771	306103	307318	282906	299660	311415	231514	275063	299799	273031	295621	308695	286685	269879	273346	225868	256544	260060	251861	253300	218122	317858	230722	283192	228667	236272	242388	281540	196281	211383	246282	278052	271200	292206	292094	254578	342765	286964	299719	281638	280280	266753	293456	286903	264831	245864	244024	259398	272592
13.40_254.1809m/z	161219	161069	144913	138586	158886	158783	151615	159973	177083	155295	160182	172601	160517	159640	161549	158981	163221	157207	163639	150691	147545	163912	157993	147423	154316	158530	153896	152895	143938	142514	155694	152915	161371	147939	150009	165574	171106	151389	160543	156697	169215	153883	165359	160068	159756	160949	154696	168549	149200
13.41_195.0909m/z	66070.2	60472.4	49685	54447	84463.8	67390.5	69717.2	100328	85355.3	79935.2	88079.6	61497.2	74103.2	62331.4	57399.6	59418.9	61591.3	51894.1	72066.3	69425.3	62208	61638.1	62781.8	70520.9	77380.8	72080.2	73949.7	62813.6	60167.2	65692.9	59593.6	61340.1	73395.3	65588.8	68487.1	81460	72230.2	75606.2	103983	63299.5	90462.2	70643.5	66382.5	64668.1	69056.7	70548.8	75089.3	77874.8	73935.7
13.51_367.2457m/z	25630.8	24278.7	19983.7	18755.2	20642.2	21845.1	21182.9	23511.4	21077.9	21647.5	23076.5	23676.3	22859.6	22678.4	21752.8	15969.8	21346.6	20734.1	20561.9	21675.1	19189.9	25175.9	19214.1	22541.6	24094.1	20381.8	20685.7	22571.6	23595.8	18868.8	22227.8	24481.2	15721.4	20429	22929.2	25129.2	22179.6	24399.3	23214.3	25776.8	27855.5	21169.8	23769.9	22064.8	19661.9	23867.7	19686.4	24192.6	23107.6
13.51_403.2910m/z	185689	190561	165847	156546	196920	172322	173910	177889	181991	164790	166956	178498	177312	191092	178609	184890	189606	182043	184603	157855	152199	165286	162946	164266	162915	174563	186942	169073	158481	159279	177713	176060	189689	165059	159892	167734	174672	157731	171750	174583	188384	166686	184613	183915	203665	187698	174171	187240	176513
13.55_494.3029m/z	92719.4	88639.2	93454.9	83951.8	89572.6	92473.9	93505.2	98651.4	93531.1	90937.7	89908.3	95358	89739.6	84390.9	81781	80072.6	80260.6	89170.1	86504.4	76424.2	84324.9	85365.2	86861.7	86447.3	83831.8	85005.5	85471.5	80731.4	80161.2	77904.2	92390.7	94112	96026.5	86510.9	89196.5	93283.1	92600.4	90157.3	95831.1	88640.3	85601	83734.7	76839.2	84503.2	84946.1	89407	87613	87758.7	91605.4
13.58_159.0143m/z	43642.1	45308	38136.3	35913.4	39785.9	37093.1	39726.7	37990.5	43748.3	37592.8	36721.3	44708.8	43239.8	41331.5	40053.1	38482.3	43275.1	41529.6	33032.1	37803.8	39155.2	34326.3	36826.1	31473.8	43318.2	39189	41103.8	37317.7	35321.7	37306.4	45147.4	45296.1	42628.5	38225.6	38357	43715.8	42144.8	34242.1	39456	34841.3	43464.7	36487.4	38064.3	40511.1	37907.1	40494.5	41390.6	41402.7	35858.8
13.65_834.5204m/z	1.05908e+06	1.0424e+06	994990	939752	1.05704e+06	1.01659e+06	1.01373e+06	1.04384e+06	1.05959e+06	952890	961384	1.0505e+06	998613	1.03998e+06	998294	989889	1.01945e+06	995752	1.00777e+06	997282	958201	1.01204e+06	1.01653e+06	1.01869e+06	984579	1.01227e+06	1.01271e+06	969430	990994	983088	1.05396e+06	1.04797e+06	1.0647e+06	969978	1.00193e+06	1.02669e+06	1.01251e+06	976070	1.02547e+06	974774	1.03889e+06	920747	1.01207e+06	1.02204e+06	990620	1.06794e+06	991036	1.03117e+06	1.04761e+06
13.67_985.8233m/z	41818.3	54057.8	21888.1	36485.8	44410.7	25324.1	36384.8	39924.9	35815.9	37312.2	45244.4	44169.8	58756.1	73606.5	67076	69627.1	43770.9	26164.8	40890.4	41422.6	44759.6	38142.2	63912.9	39344.1	28872.6	44095.5	45607	44943.4	38205.8	21459.3	44244.1	47928.9	29289.6	38477.1	32513.8	39755	51234.1	50878.7	56543.4	35774	61993.9	50339	43870	45049.9	36831.4	30951.8	28901.6	35583.7	34958
13.69_473.8039n	16228.1	10720.4	4503.96	17871.6	10705	13849.6	8473.01	2152.73	10281.2	9669.62	7277.65	6137.8	6250.38	2486.53	7461.51	8213.24	7033.04	5531.39	9080.81	9072.58	8218.39	8153.63	5073.04	4688.1	6791.14	4843.93	9291.22	5688.73	8830.79	2985.83	10207.5	25247.8	19037	10311.2	4961.37	12597.3	652.89	7456.51	5227.17	961.562	3233.32	3903.61	5030.95	6992.18	6636.87	11696.9	19392.6	13292.3	12746.3
13.69_561.8562n	21489.8	22716.7	19305.1	28233.2	21200.8	25377.2	18237.1	18435.3	26786	18590.1	15606.6	16110	23442.6	29649.7	8402.61	8625.75	16436.8	27066.5	34925.9	21191.6	13633	26864.3	21729.5	14046.2	30651.6	17280.7	21699.4	18710.6	18772.4	25891	18290.4	24493.6	26232.3	12690.6	12573.8	20122.4	21490.4	33840.4	16611.1	33719.2	30612.8	16930.9	17558.3	11588.6	16492.9	20596.4	26240.8	22467.8	29114.2
13.69_726.4563m/z	20300.1	30830.1	16090.6	26183.9	21223.9	10631.6	17533.8	10696.2	27519.9	14887.5	11054	12375	25125.8	21817.7	22975.7	22993.1	23913.9	18792	21823.6	21288.6	21938.6	19043.4	19493.9	18817.4	11972	17988	21442.2	19358.2	24704.6	19074.3	8588.95	22317.7	14047.5	18242	28834.1	24201.7	19843.6	18697.7	16001.2	16518.6	23188.6	18905.2	22509.4	27126.8	25937.7	21430.2	21575.6	8145.95	8196.34
13.70_598.3729n	157489	159405	125257	151999	161429	149139	151752	160015	182349	140882	163266	188539	150990	183971	162571	173684	154220	157026	142018	151946	136735	166353	142246	130045	120577	144756	133273	153620	136327	136386	151603	163308	159167	150058	159449	182083	180965	155173	164295	156622	170058	157295	134019	162126	152993	176284	171734	178082	151220
13.70_893.7646m/z	83793.3	104355	89470.7	103362	89228.9	79206.1	76333.4	87834.6	105371	108306	76826.5	97198.6	95918.5	112383	101713	101723	103210	86465.8	97532.8	98182.6	85973.1	83044.7	115027	85123.4	98433.2	87863.5	120780	99538	97804.7	86278.3	102850	111475	87412.6	103572	88267	109096	92173.7	100459	117619	101228	96905.8	112094	58548.2	84338.6	75053.9	100572	88199.8	78726.5	94813.5
13.71_607.3115m/z	23514.9	57202.9	41971.8	36026.7	53771.4	36054	34424.4	45223.3	42062.9	51637.2	25898.3	28003.9	34659.3	33566.7	45574	45007.3	44193	37418.2	49776.3	34034	42943.6	34062.2	45055.3	29678.2	35966.1	33952.8	34386.1	39239.4	24795.5	32166.3	40081.2	49071	38288.1	35120.1	41761.6	45711.8	46115.2	39976.9	47571.3	31881.2	37106.4	36277.1	37466	45149.4	32417.5	27768.8	44747.7	47108.9	54333.6
13.72_457.2728m/z	13678.4	16087.6	8082.48	12517.8	13801.5	13383.8	15523.2	9822.06	12454.9	13991.3	15544	15231.9	11140.9	16642.5	17685.1	12335.7	13591.6	12838.6	13859.1	13959.1	17022.8	13745.5	14976.8	11287.2	14862.4	19161.8	20334.3	17268.3	16905.2	13826.6	13375.3	14583.5	13958.5	14794.9	13234.3	10805.7	10982.9	13250.8	16199.9	16136.8	11338.2	16451.2	13244.2	11254.3	14155	14803.5	16507.4	12855.5	9788.23
13.73_164.9199m/z	9293.83	7613.99	9279.59	9685.71	7714.17	7773.61	6468.56	8894.24	8663.44	8216.85	6479.61	9708.91	10077.6	9721.51	8728.15	6613.27	8761.51	7572.19	9846.27	3433.69	10463.1	7378.82	5768.69	9706.67	7806.38	7553.7	10527.4	5842.23	7512.09	8354.24	7633.83	8924.56	7919.4	7586.38	8528.71	8638.41	8359.94	8235.49	8183.99	7631.33	7602.49	8710.42	4082.2	9059.24	9956.9	9523.68	10595.7	6842.8	10777.1
13.76_1262.4444m/z	2508.03	18179.5	7224.67	15806	12835.6	4508.17	1273.83	940.624	814.733	229.884	1631.05	2103.03	1826.37	13787.6	14964.4	2939.25	9903.53	6332.6	43.67	1152.39	688.659	5132.4	131.447	11687.3	38391.7	9108.19	6596.01	6192.97	4726.97	11116.8	1055.5	14530.1	18136.7	366.874	7.6787	55.0818	615.598	465.184	4783.35	2350.65	901.322	18493.8	3926.42	6164.85	3245.86	1185.65	1244.15	389.844	2282.31
2.03_1106.6003m/z	239521	125604	204663	288876	215071	239223	206390	180858	191084	173805	146947	171341	169570	201881	125779	155448	151267	144010	169068	195650	169325	150737	171499	245241	120240	136866	264796	181349	200054	168495	253276	215820	208242	240651	186042	187490	183225	161032	181652	189982	264167	177180	121876	178636	182362	136505	178599	126917	231998
2.10_1018.5491m/z	408867	330444	459483	590634	383194	433528	399002	418445	374926	385006	362206	277814	349924	425933	295376	325649	391134	262927	338156	353704	397914	389136	351622	417336	356255	326474	634138	350356	499586	417197	537962	480859	511824	509451	369801	405519	379584	361463	283436	319713	323439	432868	309773	377482	456609	353565	485293	303078	589057
2.10_1034.4910m/z	48806.2	27239.1	21997.1	30601.9	57295.7	56239.4	20799.1	59266.2	39071.8	16368.8	46910.8	39826	26773.9	34533.4	32126.4	40026.6	45880	31302.9	38003.4	46662.9	14781.5	37032.8	40547.1	52959.4	14179.7	31114.8	32494.7	28932.5	40272.8	34590.8	40700	56969	41324	56169.2	31111.8	39681.6	42302.3	41001.7	26491.4	22350	29573.2	43802.8	36159.7	36459.6	30938.3	28825.1	36885.6	36102.7	23810.6
2.10_207.1377m/z	19489	15349	18872.8	15575.7	20064.8	19377.2	20831.1	17083.9	16168.1	20107.3	22787.2	21877.8	18688.9	19596.9	17933.6	16936.5	16103.3	19825.3	21171.9	14969.3	18222.4	16128.4	17236	17041.2	22550.6	21994.3	16899.2	19821.2	31446.7	26834.3	18081.8	19136	18394.5	17925	17903.9	18607.7	20683.1	22538.4	23728.5	22495.6	20279.5	22693.4	20795.8	16688.4	15144.8	23668	20480.8	18376.7	17516.1
2.10_217.0180m/z	288405	328229	364071	337556	199662	149171	294329	218062	86585.8	229617	123502	94458	352473	361619	410726	170365	341783	250367	256380	171095	149239	242166	303176	160166	348571	108507	328289	116240	325172	350585	248521	196369	136666	316755	96482.9	271938	357304	229766	442940	468850	408050	280829	421922	395672	113327	269339	233287	281125	414200
2.10_360.2210m/z	10869.4	8412.08	13861.8	12376.5	10493.8	7673.64	11626	9469.06	5239.1	7415.36	8897.42	11336.3	12599.5	15155.4	16990.7	7280.55	17142.4	15444.4	11869	5854.91	6511.92	7756.73	9641.82	8483.13	18727.5	10925	18419.4	6745.8	11261.4	12205.5	11566.7	10014.2	6822.69	11012.6	7108.85	8926.51	12941.7	10919.4	16929.8	20275	17270.8	13660.3	15711.2	18377.8	7607.27	16369	11550.7	10453.8	14872.7
2.10_364.1925n	64651.8	88871.1	109556	86915.4	55298.1	38944	77193.4	52185.2	26683.9	58844.7	32031.8	29575.7	89523.5	87802.9	103131	42672.8	71259.6	54532.2	60631	37192.3	40594.8	50092	75891.8	37713.8	75750.9	26885.4	88284.7	26751.6	71763.2	81798.2	59880	48700.5	41224.6	83175.7	27608.7	62519.3	89517.9	60702.6	113278	114683	101484	67538.3	104920	104476	29356.1	63646.3	56614.7	57159.5	94874.1
2.10_683.3857m/z	8810	22210.5	27428.4	24579.5	9340.42	6571.87	17420	11093	2557.61	10518.2	7376.2	3864.47	13731.5	17152.6	13944.6	6548.36	11922.6	8393.2	7749.47	5766.66	6792.77	10035.6	8140.14	7603.46	7507.21	4583.11	10645.7	1726.57	9396.4	9167.06	13850.5	3535.99	8295.66	21212.2	4260.69	13244.3	14015.1	10258.4	19501.2	20072.5	15854	14093.4	21059.3	14343.9	3785.1	8283.99	8346.93	10412.8	16299.1
2.10_689.4066m/z	15500.3	23928.2	34549	28014.3	17080.2	10720.8	20175.2	23304.1	8947.86	15850	10635.1	10829.6	25035.6	23142.3	24139.2	9746.76	10985.6	11193.4	10250.2	9201.89	6053.4	11421.5	9154.85	4833.06	12979.3	5591.97	9758.52	2648.64	8275.59	7854.64	20224.2	15679.4	14874.3	20762.2	9630.07	11738.2	25354	14903.4	28353.4	32822.5	24031.1	20493.2	21033.3	22145.7	4333.98	12261.3	11991.7	9434.83	19979.4
2.11_435.2727m/z	7721.16	17847.8	21932.6	37340.5	17713.2	21720	16965.6	16160.2	8524.51	13766.8	10057.7	9042.46	18654.3	14236.3	18957.8	11786.7	11246.3	16528.9	17370.8	11387	9434.57	13717.4	14848.1	13888.9	14219.9	11684.6	16649.9	10834.9	12004.1	12862	12225.6	11288.1	18033.7	20064.3	10874.4	13015.4	16009.1	16550.6	15891.4	19736.3	18532.3	18774.9	14650.9	12997.6	8071.99	17324	10980	19805.8	20606.7
2.11_456.2559n	48023.1	59792.6	81214.2	117951	39788.5	29828.7	53783.6	46386.6	25160.9	42388.9	26242.3	25534.4	65956.5	66626.5	65391.1	30834.1	57246.1	48578.4	51137.7	34841.4	31174.4	40695.4	52195.7	35322.2	58222.9	33432.1	58934.6	25721.1	42549.2	52493.8	50693.7	40537.9	27303.5	68093.1	20336.8	51787.3	52799.5	44812.4	70930.3	70721.9	69866.5	53420.2	59037.1	57001.7	20369.1	43227.3	42251.6	61496.5	88757
2.25_863.4803n	399421	283535	352950	562628	387736	436056	378865	529256	452353	389799	342343	328234	337746	416411	347922	310216	348186	244458	298876	358025	470504	440592	379164	518722	441544	374277	545699	352620	419361	366759	535726	444712	459936	556462	357889	446585	402764	381289	323849	337578	370957	460391	288151	321456	407126	277722	404471	250836	563492
2.41_754.3916m/z	117970	72283.7	144343	177626	119283	161655	114770	146462	116013	106698	107882	85987.4	111661	130137	122394	95490.8	105948	84694.5	104546	107376	126511	128680	104291	139919	127326	103168	168134	101901	98864.5	107751	167603	130787	156874	161882	138544	150366	114444	113976	93818.1	89492	125504	120703	106629	115209	136083	84403.9	136349	76602.6	158658
2.42_987.5693m/z	22288	14113.7	16999.6	11473.5	14654.6	13504.4	17774.7	13411.1	23744.5	21447.8	17978.5	21820	14220.6	17031.1	17044.5	25423.5	18757.7	13087	12396.9	19878.2	9957.54	6324.31	16336.4	9878.83	15887.6	7916.95	11748.2	19394.1	18958.5	19245.3	17083	21463.1	11739.1	13735.7	13192.8	15741.2	24414.1	19085.4	20339.7	18854.3	16192.6	20612.1	24132.6	17398.8	10572.4	26852	13647.2	25801.1	14738.7
2.48_557.4557m/z	30697.2	15027.9	26727	37145.7	56089.2	30314.1	31030.7	39390.4	20322.8	23167.8	26656.8	24233	35761.9	24088.2	25595.9	46187.3	19327.5	21397.7	16396.1	18863.4	19094.8	33222.7	29829	59554.5	48721.3	29842	45781.1	42879.6	37034.1	38529.7	52382	29023.7	47182.7	43202.3	52275	23982.5	47855.4	26166.8	32863.1	39345.9	32454.6	16142	29620.4	37497.5	40012.7	30448.5	25629.5	27755.2	25585.1
2.51_977.5873n	114571	110649	146487	96496.8	153224	130466	153006	92313.4	124619	111888	156410	142839	145363	83600.7	152689	148251	128633	126578	176417	128858	148058	116837	75948.1	116308	98114	122025	133556	133019	164873	118136	84106.9	102162	199024	103097	118942	137647	147491	90469.9	130421	154141	124758	98463.7	163665	153588	84314.1	155342	140060	153375	119111
2.66_617.4711m/z	67117.7	60817.1	56039.8	122038	76665.8	31136.1	54489.2	45536.2	28008	46317.2	38696.4	37288.6	56286.8	44263.4	83485.2	59933.4	77505.6	56475.1	38869	38999.3	31781.3	35119.3	43804.1	54707.3	71390.6	35836.9	73877.4	38531.5	66866.5	69878.6	77787.3	33685.8	38476.8	53880.9	33698	49725.6	61210.5	53247.7	59415.8	81751.9	84930.1	43300.4	61313.8	106666	47317.6	45830.5	47396.4	55021.8	68675.2
2.67_217.0180m/z	404785	503135	462275	462694	365753	276324	448152	289936	218870	324746	316918	248209	422628	503168	586325	335573	509757	335519	513026	327476	264676	291582	371096	233254	347727	286483	331901	250573	420504	414648	372116	284255	300494	388849	298560	446605	470459	455189	512698	533626	524349	434372	556886	546262	295017	371622	357854	387071	463899
2.67_394.2631m/z	23170.3	49718.3	29890.9	33649.5	17518.5	24220	45579.8	14861	27357.4	19695.7	27301.5	11485.9	30490.2	36823.3	58888.7	17562.3	27420.5	18846.2	40183.2	19969	22767.2	23492	24918.8	17275	17508	24869.3	15748.7	23755.5	32089.4	31302.4	22696.2	18267.2	28766.7	29253.6	40994.1	28277.7	38587.5	38365.2	27252	38891.7	40392.1	30898.5	48302.7	45960.1	18430.9	27332.4	18676.6	20938.9	40387
2.67_462.2546m/z	5964.7	11907.1	8814.84	8725.53	2169.55	3134.36	6438.04	2678.16	3215.08	4267.2	3978.49	2359.14	6087.62	8843.66	12933.7	3727.72	7687.52	2070.55	4905.35	4258.44	2259.55	3610.55	4912.53	2538.24	4443.69	3016.64	2598.07	2686.09	6495.94	6802.03	5302.09	2621.98	5108.66	3998.3	5237.75	6493.37	7034.6	7279.32	5850.9	10379.6	9090.07	7744.07	10483.6	9027.44	3786.27	4791.01	4333.99	4323.33	6398.45
2.68_382.2259m/z	5109.6	7873.93	11085.4	11763.3	7782.14	4848.88	6824.79	6110.71	4808.35	5913.18	7020.45	5980.22	8403.86	12330.7	12507.1	6392.66	12931.8	8608.06	9650.63	6393.51	4194.14	4264.32	8233.31	2993.78	6395.49	4130.21	7046.96	4023.37	5722.85	8648.94	4711.01	2941.91	3876.08	8327.82	3718.42	9722.32	7474.73	9213.58	11598.4	13569.1	12704.6	11342.9	11298.6	12559.2	6620.93	8136.21	9014.09	8187.65	7439.87
2.69_701.6206m/z	1.24724e+07	1.22552e+07	1.16033e+07	1.10693e+07	1.1855e+07	1.1092e+07	1.12562e+07	1.04958e+07	1.05283e+07	1.07888e+07	1.04859e+07	1.07648e+07	1.22037e+07	1.16034e+07	1.14045e+07	1.06888e+07	1.15586e+07	1.06963e+07	1.26768e+07	1.09773e+07	1.15065e+07	1.14819e+07	1.17812e+07	1.14804e+07	1.1273e+07	1.09435e+07	1.0629e+07	1.03417e+07	1.22726e+07	1.18772e+07	1.20136e+07	1.11725e+07	1.12659e+07	1.08813e+07	1.07483e+07	1.15597e+07	1.21634e+07	1.09835e+07	1.19138e+07	1.20215e+07	1.20329e+07	1.07662e+07	1.17468e+07	1.13179e+07	1.09382e+07	1.13376e+07	1.14072e+07	1.23599e+07	1.23847e+07
2.69_895.6494m/z	407400	311036	323542	272758	369461	342867	328574	320567	264162	329131	316109	337156	394930	324035	313936	362506	357570	365839	338303	357672	330583	358108	334135	352998	350080	338631	357525	304735	381054	384136	365395	372034	310762	319161	287172	348267	348641	320336	361877	355804	373110	316084	331227	312228	331279	340543	357063	404008	374142
2.75_665.3742m/z	43398.6	44150.2	55497.6	72224.6	57225.1	52699	54116.5	57523.2	60002.4	59865.7	46900.2	38962.9	60826.5	39897.8	54460	51044.3	60877.7	46477.3	57367.8	44539	43033.7	53376.2	42458.7	53388.5	49966.6	57415.8	65251.7	60081.4	63634.6	51756.9	65187.8	47449.1	60367.3	58018.2	39351.9	45592.7	57185.2	53526.1	52395.1	55318.5	57869.7	64583.3	61382	66865.8	68028.6	55331	48145.9	39352.7	66383.2
2.76_277.2157m/z	15368.9	20548.1	16181.7	21225.4	11253.1	12425.9	18092.5	9716.9	14020.6	12752.3	12591.3	11438.9	14792.2	11229	15400.1	15275.4	13165	10910	13583.8	10748	11948.5	11290.1	11284.8	13087	13661.1	11806	15424.4	13082.8	17503	17036.5	20557.8	10924.8	16931	13768.5	15467.6	10591.7	17884.3	11706	13362.4	12084.3	14768	9446.78	14509	15814.4	12753.2	15129.6	11731.3	11493.9	17139.1
2.76_401.3461m/z	32259	61298.4	39542.8	45613.3	40403.8	31755.1	32957.1	28825.8	25146.8	33262.5	47377.4	32790.8	39846.8	29773.4	33181	35861.6	34617.1	27661.1	24779.2	34241.6	38021	26434.9	26863.8	28602.4	32039	37117.9	38394.6	67458	30309.2	30212.3	34768.1	39800.2	30263.7	58275.3	36197.6	46694	33386.2	98951.5	28912	43053.7	56645.8	46768.4	36832.2	38200.7	44830.8	37552.9	21791	27383.2	34398.3
2.76_429.3183m/z	24971.7	24314.7	28302.5	27512.6	24545.1	25740.6	24226.8	23905.7	22000.4	21197.3	21196	26242	24848.6	23123.4	24753.6	25124.9	26360.8	24335.1	26546.4	27774.2	25830.7	24758.8	28028.4	23126	29453.1	25056.9	26929.8	25368.1	27471.7	29515.3	28527.2	24557.5	24605.2	23141.6	24376.4	22198	24714.5	26262.9	25827.1	24415.5	27670.9	23220.2	27632.7	27693.7	19938.1	27662.5	20207.3	23105.1	27018.4
2.76_595.4921m/z	39572.9	25177.1	32277.3	60400.5	52212.4	17370.7	42231.8	29952.2	15782.9	26904.2	15649.9	25404.3	39769.7	27625.4	56872.9	42877.7	49521.6	31669.6	14535.7	15243.1	18208.7	25763.1	29786.5	50482.3	51458.3	28681.4	45917.6	28227.2	43854.4	67367.3	50065	22259	33328.4	37543.5	17698.2	26273.4	37195.5	25095.5	29584.3	49104.5	55710.5	18419.3	33287.4	67071	35056	34113.3	20940.4	25785.2	45545.2
2.76_610.5027m/z	50549.6	47164.2	40964.7	86491	61496.7	39696	71303.8	46632.3	29317.8	47076.5	32521.8	33007.9	88198.5	31936.5	72749.1	87946.5	56376.1	48861.4	19925.1	25809.3	32534	49966.6	48892.4	79612	70418.3	51243.1	80127.1	54872.8	86762	87329.6	113610	26775	51645.4	66287.2	46127.1	41194.2	54457.8	37210.3	44096	67388.1	82311.9	30381.1	54071.4	88712.9	53093	59099.4	34218	49826.8	72384.3
2.76_638.5321m/z	35598.9	30848.7	20967	54610.9	39569.4	17665.8	41804.8	26846.7	4750.59	26673.9	16137.6	11502.8	37630.2	14026	32692.8	47266	26579.2	26220.1	10642.3	17774.6	10020	23673.5	18896.9	46096.7	40618	21100	43813.7	18475	42102.9	51147.3	80714.6	17392.4	22731.2	30870.5	22727.2	20275	37346.7	23398.9	25338.6	34321.5	47246.9	15457.1	20730.2	55721.9	26776.4	33761.3	19860.5	34961.4	38334.3
2.76_639.4405m/z	87786.7	76589.6	80148.8	129437	91349.6	55439.7	86267.9	73931	53229.7	76126.2	68130.7	61711.1	83264.3	79618.6	106121	86708.3	85990.9	86227	74249.7	57718	63660.1	66811.8	69601	76130	88342.6	65747	73320.8	63419.5	97411.2	105954	94493.5	63513.7	66123.4	64981.3	53841.3	78152.6	93995.1	75937	96112.6	110161	101049	65186.5	90804.2	106316	64233.5	81731.7	77507.5	89081.9	81610.9
2.76_652.5486m/z	24734.2	18898.5	16045.6	37153.4	30507.1	13160.3	23760.2	26903.9	6897.09	12455.8	15400.1	15711.4	30162.2	10904.9	24949.5	46083.7	25355.2	16211.2	7765.4	10173.2	10551.5	20378.7	12773	36706.2	29075.8	14220.4	43567.9	16929.6	29488.7	36234	36469.5	11728.4	20747.5	21873.8	15568.6	15874.5	18522.4	14996.7	16743.1	26578.6	31579.6	13527.9	21370.8	48284	26639.7	26387.9	16584.4	14934.1	24205.5
2.76_805.4293m/z	172381	150815	136145	171768	163237	155207	146913	216352	161617	194015	149485	149419	172064	179391	178917	163568	154475	179990	171116	161921	154954	202442	162176	192609	156064	166878	171944	159084	171930	177103	151521	152416	132819	197919	142659	143210	168709	151640	164732	160509	174038	174982	153544	172901	190338	173036	148237	160271	224500
2.77_217.0180m/z	554519	635969	622539	627473	503148	305953	552695	452610	212292	513798	371618	280910	669964	680588	727254	405622	637655	490159	601298	385754	401404	486512	600805	335672	541660	339889	508940	255868	639945	646059	508652	421258	313261	527757	295620	596589	637526	530374	679509	756881	704730	555773	741608	617743	303004	518313	529414	561384	685472
2.77_344.2038n	57330.6	68827	72369.1	79930.1	51648.1	31384.5	64378.7	39088.5	21958.8	53778	37953	28126.6	68868.2	86794.6	94348.2	37668	70303.4	51211.6	56987.9	39553.7	43744.8	42977	64162	34114.1	55478.1	32642.4	50177	28883.6	61788.9	70015.9	45402.4	44573.8	37078.6	54037.5	32333.4	73599.9	67525.2	57435	81652	88072.6	84398.8	59375.2	87499.4	66211.6	33986.5	53797.4	55349.8	53937.6	73049.7
2.77_380.2131m/z	7845.65	10908.5	6485.74	7276.68	4343.21	3608.72	8631.54	6008.61	2431.59	5485.62	6196.12	3947.55	8353.32	14068.5	12725.9	3512.28	7382.52	6518.68	6508.16	5799.56	4046.78	7021.49	8535.38	1817.71	5932.75	4246.38	4232.15	3329.69	7430.75	5399.98	5101.12	7429.9	2321.74	4383.12	5352.02	7270.58	6961.55	8402.62	11460.3	10494.1	10622.1	4977.63	11464.5	8903.53	4580.33	4639.1	4823.21	5399.46	6411.39
2.77_396.2328m/z	7271.74	10142.4	11331.9	13617.2	8079.33	5450.5	12815.4	10465.8	2729.23	8574.33	8243.85	7277.97	14811.2	14877.9	14271	7291.71	13774.8	8818.51	11971.7	7324.4	9298.46	9240.93	9792.75	4946.19	11840.2	5553.38	8027.9	4443.39	13891.9	11447.2	7104.16	9354.35	2854.41	10210.6	4571.28	12853.8	8309.51	7781.58	14035.5	15322.1	14612.3	12234.8	17562.8	11925.2	7488.77	12049.2	12832.3	12701.8	14163.9
2.77_408.2421m/z	17840.4	20689.7	20183.7	24623.2	17326.8	12417.3	18758.7	13464	11576.3	17292.8	14603.8	12735.6	24594.7	23845.6	27496.9	10912	22700.1	16519.8	18632.7	14728.6	14314.8	10939.5	19787.4	10685.4	18794.5	11580.8	16698.6	8001.93	18945.8	20764.2	17855.4	13033.8	15102.5	18349.1	9475.83	21574.9	22815.4	17787.3	25153.8	23512.1	22745	20352.3	25843.2	20747.9	11209.7	16658.8	19192.6	17546.2	21802.8
2.77_410.0395n	242143	301085	291910	325489	207727	148624	255852	192764	102550	216646	158270	140776	317915	326743	361220	183446	301070	222899	272222	177632	182196	215072	289982	154133	241224	156148	220981	135501	292981	322824	205874	174158	151745	228156	145391	272403	276360	227860	336385	372804	336962	237197	372494	282923	132085	236825	231719	243073	325581
2.77_457.1865m/z	18174.4	24637.8	28862.4	29084.8	16742	6609.13	17502.4	13560.8	8380.02	17754.8	12052.5	10002.4	27386.5	28792.6	31496.5	11110.6	28033	20349.2	21487	10068.2	8600.12	11217.8	22714.1	8972.73	17890.6	12216.3	10369.6	8973.13	18862.4	24339.6	17582.4	11715.2	11445	19120.7	7374.64	23853.9	26851.3	21609.6	31114.7	32904.4	30891.7	22934.3	31546.8	25611	8653.18	17555.6	14049.3	18649.6	22427
2.77_557.4555m/z	25664	29819.8	25992.3	51982.5	33405.5	22784.2	43511	32262.9	11667.1	25073.1	19020.5	18781.2	40823.5	17654.2	36553.8	41576.8	29440.6	23955.2	11880.3	15899	17107.4	23745	21749.4	42306.8	36093.9	23388.2	36252.4	27433.8	35342.7	43819.6	50598.7	20851.1	37654.2	39939.4	37003.2	20655	35885.4	19762	25842.2	38463.4	36351.8	15610.4	34602.9	43182.2	30882.5	25348.4	22841.6	23910.5	33669.1
2.77_593.4746m/z	57309.7	53887.3	43060.6	78594.4	54126.9	29978.7	63214.8	41226.4	37356	61037.2	31300.2	42187.1	73560.3	21946.1	50124.7	78565.5	57222.7	39876.5	28288.9	29539.7	22300.4	37729.6	35260.4	54985.3	46207.3	30303.6	60668.8	55775.1	64825.8	66659.7	98440.6	27783.8	38388.6	48891.4	40944.8	44683.9	59439.3	34100.9	36995.3	60163.4	64641.3	35092.1	51808.1	83967.6	90926.5	61504.9	34832.1	39148.8	57871.3
2.77_747.4127m/z	43957.3	50081.5	37402.4	47937.3	41614.3	41837.8	37839.2	41031.5	25197.6	34021.4	34275.1	32305.9	29634.9	51538.4	43351.9	38222.8	44086.4	48678.8	47120.6	38940.6	40194	36968.8	37518.1	46875.2	39719.4	38346.5	39190.6	31555.2	45697.5	43130.9	40438.8	43649.9	42955.7	43980.3	34741.6	44349.6	52513.3	47553.8	50480.4	53831.5	56369.2	40684.5	49560.9	45311	32501.3	41363.1	34296.7	39995.2	57929.3
2.78_706.3306m/z	104710	108013	88763.2	107595	96934.7	85963.6	97373.1	85626.3	77385.3	94205.8	94947.1	94782.7	93467.6	103429	110377	97758	101317	98885.8	89940.6	80977.8	76999.2	79930.2	88040.2	78168.4	77616.8	80146.5	87315	74272.3	85580.9	83278.6	105698	91658.7	81150.4	80919.1	64439	90651.5	100350	87537.6	104556	123519	116754	101624	105522	111291	77976.2	98366.2	85954.9	96714.9	84847.6
2.79_1004.6226n	196034	196289	178058	191054	220689	88548.2	175944	203085	135433	187094	202831	164763	238135	196686	248317	206625	192733	229602	214960	122133	192229	181884	227292	171133	214807	183166	138625	205968	195078	297130	185143	177801	166472	164041	138423	201086	204793	195533	287657	295698	205288	216477	297280	206936	131183	226844	166972	238654	221292
2.80_1225.6474m/z	37334.1	41786.6	52056.9	106154	65323	68095.7	41129.7	49967	45141.4	31404.4	27883.9	15949.6	28716.6	20985.6	38623	20584.6	22347.6	14959.6	9649.16	45830.1	40306.9	64302.4	16262.7	41613.4	39780.5	25066.8	22576	17832.8	34100.4	22366.2	70707.7	28861.8	59479.5	71519.6	41037.2	102362	50201.2	35532.4	45443.4	20819.6	31391.2	27301.1	14746.6	21309.4	57881.7	20131.5	24617.7	21907.8	37930.8
2.80_650.4132m/z	222523	212047	201181	233548	220357	213466	223490	216878	178303	192091	192673	199562	194634	209793	210636	207254	198131	193320	210036	193918	177666	176924	170588	198838	175460	180158	179832	161316	182981	177535	215923	223902	225571	209791	203925	219495	215025	191312	219232	213124	210843	192304	227966	200897	191369	212357	199299	194853	193128
2.83_599.8274m/z	36848.2	26130.3	36746.7	49930	20789	47024.5	32899.2	41854.2	38807	26357.2	26669	20266.9	20003	34655.2	22065.2	22716.9	18930.9	25839.1	38038.4	41899.4	37109.4	35573.8	34641.5	35255.6	27807.8	24238.7	47048	21189.2	31498	22133.2	44146.8	47760.6	33022.5	50966.4	27264.5	35764.6	33423.4	27299.8	23817	12400.2	28723.8	30298.3	25859.5	23520.6	30241.4	19789.9	39824.1	19793	59002.4
2.84_1180.6213m/z	70012.7	57437.7	157563	171827	100339	113406	93816.6	168930	102813	58254.7	113939	73028.5	93178	149835	152309	155226	114488	71327.4	55001.4	47647.8	94102.8	98697.3	49767.9	74680.3	84484.3	101858	151019	101644	119640	109509	181817	152992	127551	142183	78558.8	168217	98135.9	99886.3	90891.3	122866	124251	140792	120684	90899.3	140822	113274	121828	60839.8	119075
2.87_1136.5942m/z	138264	149972	261940	346734	251313	288709	203355	311937	262024	231612	207259	172891	274732	246782	235136	179319	192513	155911	155992	214169	269943	266839	246327	300487	215012	164111	319954	214196	280958	191975	285510	273047	295052	325056	246849	253843	253480	224820	183338	202541	179021	245095	197643	205143	286883	183654	187003	151204	299899
2.87_568.1940m/z	627.943	624.071	608.181	1134.82	648.933	1100.75	2274.97	1487.05	741.498	1347.91	1247.8	1287.96	1301.34	1458.82	1095.53	1665.95	683.486	1047.18	407.719	666.018	429.445	339.134	143.542	350.653	292.832	289.199	168.883	128.317	328.592	344.546	1209.17	996.069	2291.18	495.847	2102.41	2156.08	1634.3	1456.59	1533.48	767.969	547.836	1447.29	1662.53	1021.09	729.311	1433.9	1143.74	687.503	523.356
2.92_370.3061n	155813	128877	121607	112779	120364	133527	116565	134058	143113	130962	123392	127954	141232	149636	147129	128238	120971	135405	126385	115792	113983	116617	105952	105966	103326	118288	100199	121182	106820	112356	117674	116030	130929	116972	139261	130574	140243	134718	121673	133870	146973	132468	138591	122806	136731	177899	114591	123345	122775
2.93_1048.5419m/z	337257	325809	386560	550746	342296	528488	372814	535820	441115	400114	415222	356624	368116	478495	370782	378663	347878	309625	306126	384166	433671	396204	446354	505823	377494	359362	524971	324261	444610	379926	550401	472796	522436	571253	403560	474200	480043	388090	328163	345008	424357	446419	342420	389310	471888	293463	388135	272798	533504
2.97_1004.5160m/z	282508	295627	470295	458482	374914	443130	312162	538114	371060	364441	357034	247301	351342	453325	304602	335427	346106	290360	307310	386056	419932	450014	390057	478611	352499	264877	501342	296756	394483	310959	498596	454890	407136	560375	345430	416497	349996	345953	238657	322155	366609	447257	346280	313270	442776	331912	405174	292034	495906
3.00_952.5025m/z	34532.3	39498.6	24740.9	42198	9718.66	19339.4	31778.3	24446.5	21691.7	33342.4	50775	59692.5	24590.7	31037.2	23399.4	71461.1	70407.7	221993	481175	83329.2	17471.2	9295.69	10457.8	25384.2	12233.6	20215.4	24532.2	38187.3	62350.2	56547.8	40491.4	59809.7	37983.3	49574.8	35259.4	35050.4	48232.9	30302.4	19756.8	52766.9	40528.9	16973.2	38861.7	77381.2	127957	161920	427974	116217	145836
3.02_587.3277m/z	28707.7	22335.6	27263.5	16372.9	26101.7	23394	28635.2	22854.7	19309.8	28241	26498	30719.3	25772.1	24882	33448.5	32628.9	34503.1	37205.9	38710.2	34097.3	27151.9	19572.5	28555.3	28979.7	27019.7	29553.2	24501.5	25208.4	23711	25152.5	27736	25796.9	18845.5	19053.4	24693.3	26721.9	28794.9	22467.8	32369.3	28316.2	34393.7	29730.1	43270.9	32063.8	29962.2	38904.4	31649.6	34263.8	30514.4
3.02_593.4767m/z	58480.2	47835.8	44775.2	74024.9	68285.7	50880.8	57627.7	57658.9	34729.8	39775.6	39483.3	47858.5	52799.9	41359.4	55594.8	86280.9	45310.4	45134.3	32298.9	39065	35191.2	59173.6	46550.9	90582.6	72624.9	56191.2	75748.7	57388.8	56853.9	61576.8	98282.6	41855.7	76546.6	57233.8	77388.8	37702.9	64593.7	37687.3	38162	52853.4	60508.7	31365.2	31648.8	69542.7	71604.5	47197.5	43350.1	50709.1	50067.5
3.02_960.4897m/z	232603	245254	411784	463799	351135	429090	324849	429208	384380	284635	326588	316734	289792	383919	404664	380370	377196	338759	356307	370191	483254	478941	407310	438103	386592	328469	519991	279632	385047	336827	432798	435815	418881	442500	332138	413695	367226	281670	275309	278671	330069	434999	378263	406678	466428	331638	480368	262942	484485
3.06_585.3138m/z	151566	154831	146053	146502	157223	153691	143228	150599	144295	151867	141994	151854	152312	136986	145211	153968	143721	158293	148675	148704	141493	131107	136956	149447	144053	146434	149863	142890	133917	143914	174085	154438	160670	139414	149960	154445	141596	135583	142947	146640	150603	137753	140756	146637	155761	139438	146619	152649	145567
3.10_594.4862n	1.0557e+06	923261	692227	1.53518e+06	1.50937e+06	972193	960903	1.06303e+06	813423	792124	827002	925155	975944	578891	972165	1.33029e+06	896983	877265	575168	645722	697690	831452	902093	1.33276e+06	1.01865e+06	957828	1.09925e+06	1.27519e+06	1.16191e+06	1.1798e+06	1.50346e+06	698887	1.18229e+06	942767	1.40336e+06	717822	1.11157e+06	752611	718687	956446	974806	490987	688706	1.17558e+06	1.32599e+06	811480	994744	911283	856454
3.15_828.4110m/z	106019	93396.2	156245	172168	115531	180918	119856	174886	197838	119202	137670	101586	115013	164063	104822	129925	140758	130925	97158.5	137527	152642	159018	113260	143258	155595	132291	228294	133028	134234	130276	167338	163200	162671	186630	120583	189209	153052	121717	107176	100984	153139	201180	151825	147235	167788	127724	189806	84929.7	232305
3.16_510.4485m/z	20939.7	24553.1	19055	31761	28211.9	24336.9	16917	29593.5	16343.7	52622	28689.3	16402.9	34088.4	31628.7	32597.5	15504.8	20985.1	24831.9	23721	23289.9	26287.7	18459.1	26219.4	18168.6	14303.5	18848.6	16642.7	16816.7	28330.2	22125.2	30430.8	24631.7	21126.6	21909.5	22853.7	38354.8	23651.4	27975.1	15246.5	25439.8	44863.9	34659	22342	11262.4	24484.7	23565.1	27771.6	28337.6	27620.3
3.25_988.6297n	847208	729744	755062	743722	870115	755615	792997	802034	878539	829901	828930	902595	907599	788750	974327	949786	731329	908940	938155	753060	817817	991643	835342	866898	985544	1.10018e+06	736942	907903	986413	1.10024e+06	739370	635450	942932	758474	723512	820977	851737	737410	926212	919436	818291	853640	968113	921853	844406	936699	953960	995438	938584
3.27_746.3985m/z	59774.6	45277.8	38369.2	53032.9	42682.8	58114.9	37153.2	43415.6	51255	49648.1	38181.4	32081.4	38152.6	48511.7	48027.8	40872.7	42923.6	36726.2	39774.4	31010.7	49389.5	40825	39936	41962.2	36604.7	33604.4	42664.5	33806.5	36210.7	37383.4	57397.2	50218.8	47321.7	62914.1	40118.2	52477.5	53708.1	42536.8	40454.4	36562.9	40451.8	44069.1	43066.4	46060.9	46635.1	43306.6	44771.6	42563.4	50764
3.32_799.4120m/z	87441.2	108512	151697	132541	168065	120809	117990	155282	99175.2	98459	126136	132516	94623.1	91286.5	91425	118380	109277	134114	91483.4	116657	77631.1	97437.1	93898.7	103451	95165.1	66903.2	103014	61985	78298.2	74103	156154	162260	86664.8	135460	102917	128446	117226	115180	115089	107695	112015	89185.6	95489.4	109794	122312	98386.8	119986	95564.3	95599
3.34_368.4248m/z	12751	21879.2	17443.6	16035	22071.5	9470	18406.3	19297.3	14704.2	21966	24903.9	28519.2	15881.8	35945.8	24977.1	31155.1	18840.4	12105.7	21468.5	21556.7	18524.9	17880.2	21414.7	13364.3	19761.6	13612.1	22832.2	20822.4	7115.15	15028.7	21349.1	18718.1	21467.3	20326.8	18749.5	22690	20731.6	25034.1	17883.3	19777.7	27433.1	18603.6	23179	29582.8	19417.8	22467.2	17665.6	9053.35	16263.4
3.34_702.3747m/z	33636.9	22454.5	43529.7	45034.6	47287.6	50513.5	35214.8	60881.5	43983.1	40098.3	33285.1	34956.4	39893.1	44980.8	41197.1	42505.9	41781	34877.1	45122.8	35024.6	40848.2	45469	37590.5	43252.5	35742.8	31275.6	52188.5	26549.5	35610.4	34722.2	54686.8	39963.5	45264.7	65008.6	44365.5	40373.8	38554.2	31853.6	30344.5	35770.5	43686.1	43940.4	48408	50522	51648	41474.5	53896.4	45478.9	62655.7
3.43_558.2697m/z	10592	18771.4	10393.6	7544.33	3677.43	13851.1	22118.6	7911.84	20598.9	15671.5	14161.5	5952.32	17419.9	13024.1	18372.7	7848.6	8165.94	4300.7	15893.9	9019.96	14329.7	18253.2	12515.1	9012.22	8379.13	12243.2	4907.12	16434.4	15115.2	12357.6	11011.3	8330.72	23139.7	11419.6	30012.4	10257.6	19011.9	13694.6	5875.5	12502.1	12117.4	9016.95	15532.1	16542.7	6614.84	13167.4	6614.42	6248.61	17605.6
3.45_259.1688m/z	36783.3	36400.4	40825.5	35797.5	39257.9	38992.9	39402	33090.8	38764.5	32477.9	33706	36424.8	32601.6	33383.4	33958.3	33042.7	31082.1	32403.4	40694.8	34487.4	40892.4	39376.3	33409.2	33167.4	33901.1	33183.8	30278.9	31657.7	39810.1	36424.6	35819.4	32888.6	41011.1	36777.4	40903.8	34940.5	35376.4	35838	37085.4	32710	36272.9	30343.5	33491.4	32979.1	29669.7	33046.7	38126.6	38931.5	37150.2
3.47_167.0844m/z	15133.6	13125.2	13005.3	10459.2	13754.4	11461.4	12537.4	12299.6	11794.9	13287.8	12398.8	11187	12310.4	13912.1	13268	12446.3	13705.9	14102.9	14451.5	14350	13928.3	12807.2	11571.6	14966.3	15344	13466.5	10720.8	10831.9	12437.8	11648.8	14752.4	14214.8	13717.3	10616.8	12321.4	13849.3	12998.4	12167.6	16230.2	12765.4	12176.8	13360.2	14833	13314.1	11813.3	15674.1	13661.1	12770.1	13190.9
3.47_469.3291m/z	65477.3	55496.5	52996.2	47422.9	63678.1	56387	44053.1	50233.1	50750.4	54711.9	47267.1	61267.2	52280.7	54197.7	45773.6	50566.3	50120.3	49590.8	46278.9	49639.7	48134.4	47614.8	47688	48355.2	55613.7	47570	51088.8	47696.1	51374.4	49192.8	58794.7	64702.8	54706.2	51465.3	50434.2	50321.3	50777.7	49480.2	57280.2	49799.8	52412.2	51082.1	45045.3	53240.2	51272.8	50960	53829.7	55563.7	50855.7
3.47_596.3892m/z	30374.4	21000.4	25852.9	22933.2	27558.4	26068.4	23780	22366.6	19575.1	22399.7	24861.4	25161.8	27608.1	18888	21941.8	27964.6	25120.3	25792.8	32659.8	25805	21958.4	19284.6	22247.6	20947.7	28876.1	21870.1	23010.2	19966.9	21398.5	19111.9	29562.9	37473.5	19006.4	20278.7	19495.4	23421	22485.9	22862.5	22084.7	24047.3	27159.8	26470.2	25369	23416.3	28911.3	23799.6	23949.1	22926	27740.4
3.48_338.6736m/z	4071.44	4113.26	36398.6	7648.19	15040.6	18964.8	9981.49	41607.2	17205.2	37020.5	218873	111195	80118.9	58990	20040.6	2350.45	2398.19	10131.4	20556.9	90881.4	24610	22556.8	21477.7	942.287	8839.85	5.37942	16129.4	5807.5	25659.2	34647.5	4938.46	21717.6	23312.1	26443.5	38886.1	14028.5	18089.9	155816	95619.1	135129	62073	46450.7	14427	6304.61	10026.1	10430	23397.8	53659.1	71467.9
3.48_415.1753m/z	28440.9	31424.8	28831.4	32369.7	26820.3	24913.1	31833.2	27284.2	28441.4	26867.2	28383.7	27025.6	33055.4	32732.8	34324.7	28374.6	28954.2	27246.3	35359.6	24371	25812.3	27138.9	23814.2	23253	25840.7	27014.9	25062	24267.5	32477.7	30652.2	24468.7	25335.3	33901.5	26061.7	30494.5	30461.4	36267.3	28318.9	37402	44047.3	32314.2	28017.3	30352.6	35485.1	24743	27838.6	30366.9	25450.7	27603.9
3.49_217.0179m/z	639391	643588	589854	560989	500152	512174	630396	457582	530758	557135	502980	395869	611475	601307	629487	467982	622950	403480	657883	529629	513253	543751	597534	483664	532458	499000	560457	481589	570717	544185	553353	449994	566537	533723	541458	574857	658278	578169	568042	732080	644112	524461	593054	681452	499057	531659	445218	507255	579502
3.49_471.2371m/z	62727.8	60598.2	61050	66141.5	61457.8	52061.7	64939	55365.2	56635.1	57781.2	56044.2	60857.2	59324.2	55970.5	62474.1	53951.2	50127.8	53307.5	73321.7	61876.4	72450.8	71293.6	58847.1	56787.8	68674	62053.7	63453.9	59912.2	66997.3	69459.6	53575.9	59315.6	63210.5	60778.7	58020.3	61907	62609.5	61864.2	66540.9	75043.7	58958.3	57327.8	65145	64485.7	58665.4	58875.4	57786.7	63173.2	61631.9
3.49_527.3008m/z	117864	116702	120398	109702	111364	91303.8	106720	93363.9	101641	100317	93930	95323	110363	107389	124238	104717	104332	100553	140313	103538	122149	111241	105638	98724.7	113121	106016	103847	100943	123614	117180	101092	99419.9	114459	91694.4	100631	103113	120674	102280	116542	138330	101006	101832	112621	121943	106957	109633	116497	115439	108047
3.49_766.4512m/z	23016.8	17420.3	20233	20350.7	22106	18215.6	18790.4	14641.4	16726.5	17084.7	15571.5	21856.1	15770.6	19059.3	16853.5	15430.5	19631.2	15481.4	22870.9	15844.3	19197.9	18010.5	19535.8	16371.1	22067.2	20165.3	20814.8	21745.6	19934.6	21185.4	20395.8	15946.4	22964.9	18462.9	18921.4	18295.8	21733.2	13908.8	20449.3	25730.4	17438.7	15812.9	19415.4	23322.9	17941.3	16778.9	23793.2	18732.2	16001.5
3.49_934.6425m/z	4.25253e+06	4.13622e+06	4.64736e+06	4.37018e+06	4.1308e+06	3.53744e+06	4.19612e+06	3.52511e+06	4.02162e+06	3.66351e+06	3.76985e+06	3.7038e+06	3.99387e+06	4.07046e+06	4.72137e+06	3.92315e+06	4.00381e+06	3.80354e+06	5.38586e+06	3.74795e+06	4.45996e+06	4.25567e+06	3.86893e+06	3.58896e+06	4.13861e+06	4.10394e+06	3.77082e+06	3.76198e+06	4.58339e+06	4.507e+06	3.68149e+06	3.67591e+06	4.4839e+06	3.59719e+06	3.92164e+06	4.1131e+06	4.37776e+06	3.76827e+06	4.55383e+06	5.68246e+06	3.9063e+06	3.96611e+06	4.55027e+06	5.04515e+06	3.71132e+06	4.00504e+06	4.20959e+06	4.40354e+06	4.12112e+06
3.53_932.6029n	101442	94441	133936	136558	131025	128501	120330	130201	108179	113213	120104	142418	131956	87603.7	143889	124497	80785.9	123513	139192	82622.4	152029	149317	106402	125794	80538	115070	96030	92186.3	138737	112892	106564	119903	119493	105248	124931	131295	129425	127287	167990	171535	104897	123258	100249	107395	91923.9	118713	144696	138298	79948.6
3.55_672.5211n	631466	1.24046e+06	1.1152e+06	1.81523e+06	489178	1.44612e+06	1.10056e+06	1.16155e+06	865190	1.04304e+06	1.61853e+06	971788	789406	1.03696e+06	822255	1.15564e+06	825042	613211	835165	953623	1.09628e+06	865649	941224	875797	1.27811e+06	1.08285e+06	737841	1.355e+06	1.05823e+06	1.21991e+06	1.01356e+06	1.11032e+06	967169	1.60414e+06	1.15769e+06	929799	882975	1.14695e+06	1.03617e+06	1.29867e+06	542677	1.02989e+06	1.44783e+06	1.32104e+06	714635	633597	1.19323e+06	1.11827e+06	788166
3.58_481.4127m/z	52112.9	48094.2	43548.1	38277.8	50492.7	46679.6	51764.6	50714.9	46683.9	49510.5	39629.1	47371.5	39993.3	44519.1	45947.1	40107.8	42773.9	42491.5	44721.3	45397.6	53786	51174.9	43676	41597.1	39355.5	38033.8	41313.2	49087	41042.3	57355.8	38421.9	54551.7	50068.7	46486.6	48256.4	50418	50434.4	43217.3	51401.7	42820	44254.9	41286.9	39173.7	42106.1	37527	41547.5	44903.4	49955.2	46770.5
3.60_364.3561m/z	15435.8	30094.7	11641.9	9760.42	10955.2	19927.2	36694.5	12143.3	29338.8	14199.2	19191.8	10524.3	23957.1	21759.7	32951.3	12702.3	15732.6	9172.17	27977.7	11110.9	19550.9	29634.3	17269.1	17305.9	12817.4	24182.7	11933.1	25140.3	20078.1	19071.8	15083.8	11161.2	25073.9	21765.3	37679.7	15431.8	25490.6	20210.5	15811.6	17468.8	20736	15535.8	30595.4	20939.8	17504	17579.6	8958.95	11135.8	24261.1
3.62_1122.5615m/z	292369	196964	323528	422728	303032	382237	293030	377102	315614	231744	304868	244048	240485	358640	296369	283628	296249	214915	214016	291274	347369	359054	299818	422289	282606	242327	474988	277845	340118	309783	391192	374076	398672	424678	287661	337796	341028	264426	197592	199739	277515	379549	259665	277807	314177	245893	315380	221673	533795
3.64_596.3905m/z	37694	42030.8	47732.1	42345.7	34645.5	43027	41633.1	44023.3	39246.9	46151.2	46333.8	46082.8	42385.5	41589.7	46890.1	46450.1	38220.6	56531.9	42447.5	36618.5	42090.8	47965.3	35888	43772.9	39961.1	41693.2	45190.8	42867.5	39750.4	44436.6	43549.4	39388.9	46573.4	48800	51154.2	39936.2	39833.2	42047.6	46128.4	53447.6	43065.2	42373.6	41466.4	36703.5	42124.9	47140.9	47006.6	36379.8	39400.5
3.72_128.0621m/z	26432.6	26574.8	24173.5	22233.9	23062.9	20056.8	22141.1	25275.4	25077.3	22681	28921.7	19973.8	19985.1	23369.8	21452	23299.5	31350.2	26147.7	36165.4	37345.3	30957.4	26916.6	38985.4	25723.8	46951.2	32558.5	50301.6	48701.1	36255.8	37045	25024	19061.9	24994	24673.3	33854.7	23193.9	25288.6	27114.6	33297.2	22602.8	24715.3	26213.1	29663.3	36480.7	25767.5	27807.3	27900.9	38802.9	27195
3.72_187.1118m/z	25505.2	28490.1	26203	25840.7	29694.3	27303	30471.7	26434.1	33017.4	25761.1	30871.7	29662.4	25276.7	24063.5	25144.6	26026.8	29798.2	27511.7	31676	34277.4	29162.5	32937.2	33852.7	33722.7	49029	38147.2	44308.7	50367.1	35539.5	35245.5	27075.8	25941.6	32385	29285.2	38886.5	30019.3	29742.5	25890.8	35183.1	27491.7	25277	21253.4	26850	34732	27431.6	32935.5	34287.1	34402.3	40543.2
3.72_203.1429m/z	343424	324351	274009	257149	304453	266036	266108	246924	275756	257126	311610	247783	267632	244585	248549	270239	300910	293040	316743	353562	367567	352489	400586	317165	593951	325659	567176	518295	372745	523707	354007	297278	321803	284065	332362	268839	301617	259468	369642	219430	246657	230837	276811	444052	262927	307112	300096	426542	361528
3.72_219.1744m/z	4.05068e+06	4.303e+06	3.89489e+06	3.36289e+06	3.89397e+06	4.02505e+06	4.04549e+06	3.80412e+06	4.47525e+06	3.89424e+06	5.36629e+06	3.74522e+06	4.30027e+06	3.91581e+06	3.77676e+06	4.04404e+06	5.03929e+06	4.46485e+06	5.26781e+06	5.47006e+06	5.97796e+06	5.66173e+06	6.81573e+06	5.23967e+06	1.14183e+07	5.84531e+06	1.16454e+07	1.00943e+07	7.07731e+06	9.09842e+06	4.52701e+06	3.87137e+06	4.90267e+06	4.55966e+06	5.48029e+06	4.28976e+06	4.85665e+06	3.95445e+06	6.57133e+06	3.67987e+06	3.70667e+06	3.77469e+06	4.18313e+06	8.07513e+06	4.05875e+06	4.84764e+06	4.59967e+06	7.07861e+06	5.67808e+06
3.72_829.5799m/z	2.36674e+07	2.86303e+07	2.64283e+07	2.26029e+07	2.86665e+07	2.94282e+07	2.84608e+07	3.10814e+07	3.54642e+07	3.15603e+07	4.34498e+07	3.29406e+07	3.70274e+07	3.01882e+07	2.98237e+07	3.23198e+07	3.81567e+07	3.4333e+07	4.33604e+07	4.55237e+07	4.81287e+07	4.9922e+07	5.87993e+07	4.80543e+07	9.31916e+07	5.08661e+07	8.86539e+07	7.46141e+07	3.36546e+07	6.52296e+07	2.96619e+07	2.4874e+07	3.38422e+07	3.24667e+07	4.15202e+07	3.29492e+07	4.05522e+07	3.10832e+07	56237496	3.18688e+07	3.17296e+07	2.56394e+07	3.18709e+07	5.82099e+07	2.97115e+07	2.75908e+07	3.64658e+07	5.69624e+07	4.41426e+07
3.72_832.5719n	385334	458869	313450	301195	356465	385349	329116	342521	317970	261902	406666	335345	291051	195943	234029	240698	279313	274165	197077	292956	287482	187944	262988	183027	410746	218093	345449	386765	198054	262814	449016	383434	426860	382548	468526	326131	356999	252956	470988	283395	296699	184264	285358	478936	215720	271662	214421	337951	211333
3.72_860.6001n	2.01981e+07	2.48322e+07	2.17649e+07	1.84177e+07	2.25754e+07	2.26147e+07	2.12058e+07	2.2964e+07	2.46506e+07	2.2129e+07	3.00951e+07	2.28279e+07	2.51812e+07	2.08892e+07	2.18793e+07	2.31147e+07	2.73496e+07	2.35978e+07	2.66058e+07	2.97636e+07	3.19257e+07	3.26942e+07	3.74763e+07	3.01332e+07	5.79851e+07	3.24628e+07	5.61587e+07	4.79012e+07	2.28929e+07	4.25163e+07	2.56362e+07	2.09053e+07	2.70992e+07	2.4797e+07	3.16241e+07	2.42499e+07	2.896e+07	2.1299e+07	3.65274e+07	2.12746e+07	2.17937e+07	1.75399e+07	2.31509e+07	4.28478e+07	2.11827e+07	1.97317e+07	2.50903e+07	3.67941e+07	2.95648e+07
3.73_1034.5092m/z	252582	198578	338852	392380	294139	342565	234765	374898	307477	249122	257218	257169	199332	329541	248675	257724	284589	217332	189384	239073	262657	298256	199182	320742	203578	179420	399696	194162	279254	269257	362149	351201	342444	368185	269652	276708	305442	212198	206482	201448	240902	343472	306016	233497	326160	244121	337104	242693	384460
3.73_783.5204n	8.78832e+07	9.59934e+07	8.62959e+07	7.24483e+07	8.85974e+07	8.85436e+07	9.19095e+07	9.08315e+07	1.02923e+08	90724899	1.16811e+08	9.21698e+07	1.02368e+08	8.95146e+07	8.57389e+07	8.89409e+07	1.06789e+08	9.55889e+07	113663884	1.23031e+08	1.37474e+08	1.36807e+08	1.52499e+08	120551712	2.13089e+08	124010141	2.10489e+08	1.8256e+08	1.21936e+08	1.64676e+08	1.01498e+08	8.56795e+07	1.07802e+08	9.71237e+07	1.14621e+08	9.74511e+07	1.13405e+08	9.43693e+07	1.4891e+08	8.8995e+07	8.97129e+07	8.4758e+07	9.36224e+07	1.47602e+08	8.54511e+07	9.82869e+07	101117109	1.51576e+08	126178627
3.75_423.3276m/z	553151	546890	543600	557731	590974	549618	580219	549451	578166	494777	602343	627228	571148	585777	662545	666182	594566	673126	716343	566755	678100	668646	531003	594675	597650	644285	501319	582994	563304	589017	550233	571422	570733	485282	590245	600424	585837	544250	661157	629331	575473	580951	681590	577580	577367	641163	723209	631880	552001
3.76_445.3681m/z	53348.2	28942.6	33355.4	37248.7	40746.3	38005.3	31040.7	33142.4	34422.1	30512.7	31435	25499.5	22666	25042.2	23383.9	26186.3	30995	27659.5	30102.2	18426.9	19264.5	14943.7	35553	26189.5	21372	34714	32102	21783.9	55503.5	24887.5	66193.2	55459.9	21516.3	47288.7	33470	30812.6	22022.1	30453.6	27058.5	16249.2	31510	20309.2	22641.2	22004.7	21636.9	25576.1	47322.9	42997.6	33291.3
3.78_1242.8046m/z	37937.5	39756.7	49010.8	31589.1	42241.9	55520.9	40358.8	37555.8	39048.7	35025.5	55279.4	44284.6	44248.1	53082.3	64019	59833.6	35612.5	37717.6	41157.6	43936.3	45536.1	48828.4	50468	45425.8	46436.7	36740.6	34928.8	34100.6	57895.9	34038	44813.5	36899.9	32199.3	36180.9	28206.5	44741.6	34750.9	59209.3	47844	51055.2	46978.1	62546	35188	48219.8	24489.2	65193.2	36801.6	41753.5	36817.9
3.84_817.5497m/z	69734	61628.2	56776.8	59770.2	75542.7	86910.2	101777	94265.7	120301	95933.3	126862	85781.9	71798	62990.7	44289.1	57609	55396.4	59299.4	77214.2	68716.6	87927.9	57603.6	51791	67319.1	77659	51985.2	68847.5	68229.5	60518.8	66018.1	72230.2	59807.3	80752.3	99073.4	111314	84162.8	118440	87477.7	120700	70652.4	54564.9	59319.3	40089.4	64849.6	44265.1	64530.9	50923.5	77309.1	69307.3
3.92_725.5587m/z	38345.8	53647.3	88404.6	55210	20591.3	88822.5	56889.9	47753.9	35107	61059.3	63868.3	38766.6	41724.7	66864.6	61024.6	53913.8	62488.1	70624.5	39153	40104.2	41257.7	66842.5	40490.3	58933.5	47693.3	34504.4	66694.2	45381.3	52978.3	68850.8	46613.2	82942.8	57709.3	50295.8	61395.3	81363.6	63314.9	46392	54271.6	92112.8	45765.1	44030.8	88062.4	74029.7	57703.6	66241.4	48671.1	64002.3	65948.4
4.05_687.5436m/z	101501	240889	217486	237812	74092.5	190940	159834	180109	107202	157668	184102	127780	104126	162058	130778	172914	167829	166833	146704	126661	196779	106862	158002	172310	155615	149036	135606	191263	206351	265927	200413	187167	114673	144928	137264	184765	123352	139390	117319	223910	141529	158326	262521	184679	121745	137929	191809	208503	191545
4.14_1133.6934m/z	38425.8	48364	60036	36482.2	70758.5	63806.8	50091.6	40265.4	38812.9	35321	49596.1	57444.1	67151	48080.9	55701.6	62603.5	46463.1	66135.9	46366.2	55739.9	59350.4	61691.7	42836.8	72192.9	60682.2	54668.4	44138	50267.7	56256.1	62483.4	57160.7	38701.7	76297.1	42575	52681.9	53167.3	43346.8	47518.3	86467.6	74012.3	55966.3	65474.6	40113.7	61864.3	39623.1	77793.8	33630.8	41320.4	45722.4
4.18_725.5583m/z	139149	217537	271869	259216	117978	330979	266100	197725	178352	236219	242111	179383	252253	210705	260466	229821	196599	219328	144268	189588	226360	256268	166228	281429	239396	202408	281614	271806	206459	283975	213597	275323	225889	253466	223254	237214	202667	197980	194022	266966	165770	216015	294446	386317	267895	194710	183242	235765	224810
4.20_1200.7940m/z	60496.4	57887.6	95018.7	97103.4	119504	69526.2	82410.2	57061.6	92330.2	57554.4	107708	142226	96399.3	86064.5	99491.5	94118.7	59444.5	82024.2	97528	73108.9	94404.3	98097	97191.1	48501.1	111048	125993	48715.3	54376.8	46761.3	52481	86917.5	129674	142884	51438.2	101235	78954.1	54032.8	102325	91394.5	129085	108432	138530	97405.9	68452.8	39775.4	94443.1	62164.4	97872.7	49303.5
4.23_495.4002m/z	18349.6	21915.3	17338	12889.6	18714	19591.9	19505.9	22072.9	18782.5	18625.2	19887.1	18416.9	19409.4	20553.3	20723.4	24113.6	21687.2	24468.3	28798.3	21000.6	22044.9	27683.4	16134	32369.5	26038.5	25632.2	20378.8	28090.5	18625	24581.5	23121.8	20052	22459.7	16084.9	20623.1	22385.7	22252.7	16289.7	17866.1	17155.1	19262.1	20965	19253.1	22823.7	18978.8	27508.2	32217.1	27184.8	23019.8
4.31_673.3456m/z	33136.8	25882.3	35366.2	51091.8	40826	43250.2	32077.2	44869.4	45322.3	39854.2	35869.4	28551	26483.8	38688.2	32683.7	33850.7	25479.4	26584	25326.5	32409	33286	31838.3	32324	45842.6	45562.5	25525.7	60221	33217.5	32703.8	31333.1	47536.8	45876.2	52666.4	56723.4	32479	41552.9	35995.5	38518.4	32679.4	24163.8	40053.5	37166.3	25171	37580.6	50141.9	26846.4	37319.8	26541.3	69053.7
4.36_822.5651m/z	159895	141268	233149	208241	87287.7	143613	131892	171471	125046	137518	168181	125912	114495	156581	250229	132739	199159	166812	150199	137418	194616	164459	219544	166197	127984	142835	132314	97750.6	135252	252852	200782	291417	161285	95069.9	121532	337907	164304	154922	160797	175698	149177	201373	217930	158681	134165	158507	219285	166482	165891
4.39_778.5394m/z	972756	2.61628e+06	1.89044e+06	2.12169e+06	728284	914866	1.73398e+06	2.12194e+06	893871	841922	2.12219e+06	1.32491e+06	1.45071e+06	1.22828e+06	858976	1.2178e+06	596274	772300	1.04819e+06	1.97207e+06	806442	1.06377e+06	923742	789014	2.05296e+06	1.5596e+06	1.36412e+06	1.81813e+06	1.25431e+06	1.35862e+06	1.5222e+06	1.85009e+06	1.21791e+06	1.82916e+06	1.56317e+06	737991	544816	2.46795e+06	1.84441e+06	1.35632e+06	386743	2.25742e+06	1.65864e+06	1.60237e+06	927712	582202	1.40106e+06	765978	577540
4.42_466.5351m/z	1709.41	9491.49	4654.58	6060.35	12383.2	17351.9	2147.01	5095.35	9035.94	10762.7	14542.6	6944.46	7265.99	4140.68	7493.87	4190.9	25704	3901.26	780.769	12718	5232.12	8236.16	4336.06	2109.04	9859.23	7424.47	4820.61	14810.2	24040.4	15042.7	7675.16	10099.3	16727	7041.26	3724.52	15578.9	17576	5089.88	15408	17836.6	9269.31	15028.2	10261.9	7357.15	17716.2	12615.8	24178.2	10764.8	16571
4.44_348.3390n	415475	995733	445131	240363	280071	632423	1.04899e+06	223144	833981	321143	650557	170408	537351	521464	867334	304283	387146	205519	950801	555652	552937	1.12596e+06	641981	562195	357334	759372	283246	661052	591978	582281	410142	343132	1.07273e+06	556158	1.64626e+06	501426	978030	605980	351895	401023	491357	353766	774692	734958	381938	386897	233329	289519	798758
4.45_340.3574m/z	183297	402943	217847	107656	136842	263246	371123	97593.4	333185	141109	293188	87379	216798	219724	339650	132801	153027	92721.1	356264	222711	221407	389787	267553	247478	147838	330053	110914	256605	210886	235786	188915	160635	431288	234700	672649	231997	395427	257294	148821	167247	189920	147440	286952	299524	176533	147303	99051.8	117973	311840
4.45_388.3563m/z	75081	102716	67530.2	55162.5	67596.7	78034.5	106076	58082.6	102897	68497.2	88204.9	63423.1	87963.6	71807.2	99777.4	72860.5	73317.3	57851.2	99087.2	69608.3	68599.6	108149	73602.6	75225.6	60800.3	87070.9	57264	76167.9	76197.5	70647.6	74480.6	63705	106346	76061	124635	72948.6	106703	76193.4	70601.7	74527.4	85257.5	68954.9	99220.5	87652.7	77064	74001.2	65555.7	60130.8	90285
4.46_743.5636m/z	15721.3	11534.5	26582.7	13205.3	8428.62	17467.4	23572.9	9755.84	20336.2	16753.9	14678.6	12960.5	13556.5	30758	16234.7	17553.9	19234.1	18268.5	13611.8	19183.2	22020.2	11551.1	19755	15978.8	12107.4	13247.3	19691.5	17044.2	17873.6	22017.3	17265.6	19383	12825.1	21245.5	17020.8	17769	18808.3	8188.65	15138	22724.3	16820.5	16930	21201.8	18100.6	13448.6	20186.4	17476	11851.8	17597.6
4.52_1208.7771n	1.70315e+06	1.7353e+06	1.63256e+06	1.42652e+06	1.81826e+06	1.55464e+06	1.55456e+06	1.49296e+06	1.54095e+06	1.53551e+06	1.55834e+06	1.52784e+06	1.58414e+06	1.5034e+06	1.61614e+06	1.5946e+06	1.41418e+06	1.74297e+06	1.84883e+06	1.48306e+06	1.84539e+06	1.76845e+06	1.57445e+06	1.74732e+06	1.66023e+06	1.62025e+06	1.44026e+06	1.75492e+06	1.71902e+06	1.74607e+06	1.59212e+06	1.81458e+06	1.70889e+06	1.53944e+06	1.70879e+06	1.63012e+06	1.61874e+06	1.66424e+06	1.94441e+06	1.72708e+06	1.47722e+06	1.71351e+06	1.72675e+06	1.53268e+06	1.42105e+06	1.96229e+06	1.48219e+06	1.59433e+06	1.39349e+06
4.53_701.8202m/z	76227.7	58375.1	136807	74679.8	157043	145954	98314.2	81453.8	70835	56305.7	58740.2	59345.2	55274.3	69185.6	75932.4	69703.7	91116.8	66925.6	78433.8	77606.9	43972.7	44478.8	22516.9	52035.2	36036.7	44582.1	75912.2	38069.6	35298.1	27048	77844.4	112917	108141	120251	111210	60034.2	94116.5	56135.7	49198	39109.3	97358	42887	109671	105118	61468.4	56983.9	87379.9	63737.7	75217
4.57_370.2568m/z	100402	126261	152854	160908	106441	161786	114045	126061	106362	125146	124646	115910	107871	111283	129031	130986	134442	126401	118536	102493	126721	117730	132037	117929	116815	111970	107873	118273	125305	149949	137975	157065	112100	138133	125208	141248	109658	114337	112041	140818	113136	133148	138690	141577	118984	127013	123531	128752	143577
4.57_853.4993m/z	51895.2	66390.6	69214.1	80205.2	60339.3	87859.1	63756.7	58861.9	55969.5	79170.2	87667.1	61397.7	50610.7	64252	62599.9	88922.7	71950.6	76517.8	65521.7	55136.4	71026.6	61186.9	63218.8	78188.7	71396.5	59219.1	47516.2	56638.1	61457.6	74119.7	74686.1	71065	63001.2	58890.2	79369.4	86674.8	57946.7	77668.8	45198	83728.6	48733.8	64318.7	80912.4	83350.9	53786.9	72214.6	62500.3	50879.7	78972.8
4.63_798.5644m/z	523572	530628	688504	1.04187e+06	391768	577300	565925	604348	576350	611779	766270	616645	498983	964094	1.03771e+06	572200	688209	805533	532234	465152	635980	567050	841054	559146	652580	580492	534025	604494	619809	1.04601e+06	592363	910694	578797	477955	662483	1.46904e+06	716222	883361	577388	781696	579018	1.17717e+06	959537	617881	703595	584741	847369	639798	675204
4.65_728.5093m/z	135391	185288	194978	262231	148914	185877	190957	203354	138005	184157	211336	203955	194555	212147	199908	178019	157484	169937	175351	194337	171697	207747	171787	189701	195836	171079	169291	201527	194885	180624	162813	207658	147342	221351	414711	220137	153747	237783	173780	215436	147825	263470	224986	252557	162823	166978	206294	173003	170610
4.66_772.5493m/z	59653.9	81706.7	68584.8	298982	82454.7	91710.6	52418	76299.8	41246.6	93271.4	223650	97344.5	48749.9	59166.2	156475	138933	81462.1	63840	190407	69072	63265.5	57431	141115	92724.1	107705	98558.2	64379.4	106025	76007.8	95902.2	53427.9	78271.9	55113.1	68662.9	81309.9	252242	75216.4	219260	60466.8	200729	60970.6	122598	69788.2	117306	107919	40743.6	214845	44514.6	70129.8
4.67_1108.5282m/z	193293	111876	177137	274727	169637	234843	127922	203212	201679	175640	184313	136915	132625	187443	159012	156351	195286	125269	177342	158089	200942	209202	183354	202683	167694	140136	311927	162954	181839	145302	236004	211929	255439	241853	174395	179178	164552	149203	108002	118362	175540	177911	126627	172631	218291	142126	213948	179275	201712
4.73_683.6076m/z	88379.6	101026	87878.3	84183.3	92635	88919.6	76678.5	80027.9	72474	66838.1	87387	80534.2	86156.1	81166.8	77461.2	76246.3	87730.3	73572	94473.8	91580.7	80525.5	87020.8	85847.6	88827.9	67349.8	89212.4	78116	82618.1	106415	70809.3	96823.6	106124	79079.7	84261.7	71157.7	89438.1	73921.7	75020.4	73168.1	92138.1	75661.4	81519.7	83564.4	87268.3	76670.4	80812.9	75652.1	105482	79871.9
4.77_1120.7238n	456307	443554	331017	234098	391790	305115	442697	280373	760504	322697	450096	273973	443643	347748	624388	347885	312128	332158	533758	338770	426235	388435	367903	399194	393383	524902	332082	321498	325738	366243	342814	375416	480272	331300	559319	320039	552241	350882	410685	382478	303909	327869	745186	428247	281712	369998	320235	443702	353176
4.77_1166.7820m/z	42171.7	65477.1	58381.2	68029.6	58236.9	50922.4	49588.9	45091.6	81456.8	54610.8	67782.9	56653.3	54956.4	62100.5	77451.8	54839	39066.7	38291.3	63012.9	50160.7	66408.2	62745.8	36020.3	36930.4	57788.1	68142.2	45131.9	41470.4	44743.7	59771.8	63177.6	55776.2	82879	41665.6	62399.1	49420.1	61030.9	55383.7	61512.1	50257.1	39979.9	18239.8	66550.4	61482.3	54975.3	55580	66152.1	51837	64583.7
4.82_773.5581n	1.34741e+06	1.73702e+06	2.00289e+06	3.51449e+06	1.22831e+06	3.30569e+06	1.93466e+06	1.92654e+06	2.06106e+06	2.54762e+06	2.24291e+06	2.24841e+06	1.47555e+06	2.25933e+06	3.23562e+06	1.796e+06	2.96698e+06	2.7266e+06	1.69348e+06	1.56311e+06	2.2223e+06	2.05712e+06	2.7394e+06	2.29184e+06	2.02074e+06	2.05108e+06	2.02108e+06	1.4015e+06	2.44401e+06	2.92245e+06	1.90834e+06	3.76524e+06	1.86828e+06	2.12068e+06	1.60986e+06	4.57725e+06	3.49503e+06	2.50832e+06	1.96263e+06	2.96006e+06	2.94829e+06	2.78823e+06	2.74168e+06	2.51669e+06	2.01649e+06	2.0629e+06	2.85793e+06	2.19671e+06	2.61274e+06
4.88_727.5748m/z	1.03836e+06	1.47499e+06	2.19001e+06	1.81179e+06	648064	2.03284e+06	1.29148e+06	1.48278e+06	1.08107e+06	1.69596e+06	1.6484e+06	1.04972e+06	1.34226e+06	2.00137e+06	1.60812e+06	1.46918e+06	1.50472e+06	1.48282e+06	1.30478e+06	1.09464e+06	2.02869e+06	1.56434e+06	1.65818e+06	1.602e+06	1.23669e+06	1.11679e+06	1.38247e+06	1.3894e+06	1.58921e+06	1.88748e+06	1.57719e+06	1.95344e+06	1.2347e+06	1.2575e+06	1.37941e+06	2.43205e+06	1.47897e+06	1.26757e+06	1.14834e+06	1.84821e+06	1.16539e+06	1.43508e+06	2.33959e+06	1.76148e+06	1.3496e+06	1.59588e+06	1.65316e+06	2.07304e+06	1.42805e+06
4.89_790.5751m/z	67442.9	85838.8	99661.4	69267.6	42690.2	68771.7	81884.5	58135.1	61460.2	59722.5	97815	57388.8	62376.8	48849.3	76060.8	52122.5	57758.3	67824.7	27533.2	73477.4	181476	66238.9	61950.9	56934.7	53157.7	57171.2	60616.1	93124.5	55812.4	203620	74722.1	110911	94686	60777.2	80347.8	48789.6	133726	98993.2	86156	71990.2	60324.5	75619.2	91185.5	72075.5	59376.3	75504.6	77145.6	55350	67878.4
4.92_612.5558m/z	1472.67	1078.2	1066.55	4040.57	2151.91	1931.78	1081.57	1777.2	4606.54	2252.26	3191.69	3826.34	5089.69	2442.4	1392.76	2332.31	23287.3	2378.86	3081.5	961.305	1049.42	981.644	2047.17	1391.48	1683.6	3107.11	1872.66	2319.35	1870.28	2453.88	1440.94	959.305	1415.73	1165.28	40055.6	3937.83	4950	1260.23	1367.79	3076.94	1437.46	1373.04	2317.23	3708.53	13785.2	3169.95	1578.76	1483.52	1137.12
5.02_877.2633m/z	312.618	328.382	354.008	448.457	379.782	607.007	331.488	211.116	175.074	218.205	234.626	318.88	388.822	378.246	591.964	725.345	699.925	559.703	299.486	31.0245	16.5305	8.6776	8.35892	16.7532	5.10042	6.16358	9.57604	13.2549	12.981	37.6642	288.161	22.7001	613.239	304.016	195.749	601.392	114.549	192.204	166.671	256.561	515.38	786.022	1398.54	1054.55	427.443	440.028	230.668	93.3105	60.521
5.07_638.5686m/z	8759.73	11472.8	5916.66	9404.62	8876.59	14712.5	6529.73	10754.4	10949.8	8251.72	8305.98	11037.8	8040.52	7269.44	10044.9	7418.54	11232.1	9502.69	7376.08	7529.54	9408.84	9281.91	8187.25	7204.46	7178.36	9846.11	6141.42	10472.7	10640.1	6028.69	13467	9553.7	11496.7	9935.17	38067.1	9454.26	7559.41	6407.19	11334.1	12080.4	9252.6	8116.37	9068.03	11941.6	8667.06	9072.7	8328.74	7399.68	9835.53
5.07_802.5950m/z	51189.7	139090	164611	187615	86513.2	96113.1	79483.7	77653.6	86629.2	110604	183752	124561	132648	79925	93130.9	127074	85992.6	93433.9	83238.3	101122	132654	79875.8	89942.4	67818.5	121949	113430	66913.8	120791	41068.7	108196	94954.1	184699	92598.2	115197	188995	109843	93000.1	206810	127391	161412	77654.4	95846.1	149979	127275	87873.7	47273	173001	83939.9	72706.7
5.11_780.6364m/z	54616.6	79530.9	75607.4	128308	52629.6	26470.4	73003.8	32601.2	59576.4	60008.2	127188	79491.7	85485.7	50832.7	46610.6	103555	78950.6	70009.9	35704	79389.5	57034.4	36145.9	76898.8	11146.4	144787	68294.7	41955.3	66390.6	51072.3	35928.7	84627	104920	62153.9	88199.3	167435	71083.3	31282.3	207476	88789.9	132109	28884	89066.6	79132.5	55286.1	72332.1	47082.6	98943	52113.1	24265.4
5.11_802.5371m/z	355424	1.07959e+06	827609	1.22121e+06	465781	325270	534587	365554	490162	495697	1.03678e+06	491730	521536	387736	548095	556493	464353	412333	362784	631387	631285	440998	644643	306554	914029	677283	363525	1.09363e+06	542238	721428	631938	1.59743e+06	722803	617926	1.05745e+06	416724	280458	1.93877e+06	787283	688702	256610	759623	822929	746311	510915	314713	767640	424008	466292
5.11_974.5848m/z	56301	238928	172592	259638	67042.4	38724.4	75225.2	34246.4	66852.1	64799.2	211922	54912.5	79066.8	54454	73017.9	95278	60269.7	49812.5	34802.2	114335	109105	67083.6	112761	33844.6	181704	126941	58904.3	263641	93443.9	153558	114193	376118	126063	128468	234934	50216.9	24441.8	412154	141568	123934	37035.4	140941	123198	136471	71541.5	33483.1	133967	53969.1	61503.9
5.12_864.5079m/z	56297.6	127380	126071	134019	71771.9	50616.9	73454	60351.7	63143.2	63356	138134	68948.8	76643.5	71084.4	85645.6	76747.8	61466.6	79460.8	69233.1	100095	113947	77225.5	110288	60744.3	132704	115799	68877.6	146634	78125.6	113990	92863.1	156712	110301	88099.4	128136	72323.1	45042	173014	103265	100385	37457.4	102370	114227	105744	83383.8	59884.8	115497	78237.8	78173.2
5.13_781.6521m/z	5316.91	35870.8	13645.4	37193.5	4692.27	2522.13	2629.01	4607.84	8658.38	3453.18	21460.1	6271.61	5493.7	4118.07	4213.23	11344.5	6687.86	7336.27	2891.86	10192.2	7263.08	3020.26	12971.9	1753.67	32309.2	4075.15	5301.64	32304	4063.13	8599.68	9140.52	34084.8	15788.6	5711.15	28398.7	4809.98	1722.91	22954	15301.5	7738.29	2746.16	12465.2	18291.8	20562.2	4200.58	4324.72	7587.41	4650.52	2677.43
5.20_779.6057m/z	33095.5	45066.4	34444.6	39612.2	10858.7	50622.3	35699.9	22948.4	27237.7	35322.1	42912.7	27059.5	35525.7	35261	49264.6	25598.5	29400	24905.6	21005.2	29911	27965.7	55057.6	40000.8	31154.1	38770.1	23902.1	26579	21344.1	19276	13905.2	29363.6	65959.1	28543.1	45494.3	38131.1	51704.2	46542	37698.1	40013.5	36750.1	16917.5	46607.6	43322.1	45497.1	29133.6	17182.6	54887.4	34718.4	31996.9
5.21_715.5750m/z	456710	591342	788128	755152	271854	724678	437777	562934	387258	665454	645510	465184	458562	647438	589558	508370	582759	509322	461091	393941	645587	489378	753400	573407	468784	414883	372281	472856	651429	794301	593721	630422	408061	486499	609789	851572	428823	384303	414395	971972	508130	618354	775531	747388	412101	585922	789434	675955	626591
5.28_1247.7418m/z	40175.5	37701.5	25659.3	27021	84649.2	24150.1	49687	45322.4	75527.2	30128.1	35584.5	16200.7	29787.7	51010.9	91095.2	26285	9430.3	29624.6	26302	37808.8	41385	18910.7	61808	74944.8	44145.9	64873.6	47647.1	42867.9	45299.9	76916.1	36092.3	46142.5	49759.4	30350.8	58219.2	31651.7	62750.3	47880.6	63978.6	22208.1	28954	19692.3	56835.2	66082	31273	45538	65179.6	61755	87605.9
5.29_1226.8104m/z	552922	513711	378261	349158	454753	395442	617230	413636	695646	326389	487436	454547	438994	437695	621533	470600	451000	430736	613218	306003	391111	324278	362694	328955	361201	543425	397647	387432	238796	443585	338381	354077	556699	393452	672240	455536	566663	450091	615997	542408	391956	491661	682523	472262	341707	447250	403326	571356	429098
5.29_638.5685m/z	19875.7	13311.4	15057.9	11259.1	12664.6	12499.2	13807.5	11244.4	16695.8	16477.2	10860.3	13457.6	17246.3	9230.93	18923.7	9773.35	9747.95	12171.9	13366.5	9296.57	8786.15	11065.5	14963.6	12249.1	11532.3	12557.2	14304.7	14184.2	15951.9	11563.8	8927.38	18051.1	18608.5	11613.4	61164.6	14009.1	18660.3	11855.7	14983.5	13829.5	17549.1	11164.6	19114.5	14266.6	16552.4	16733	10391	14228.4	10909.4
5.38_482.4196m/z	130497	109332	108375	108663	116480	104496	112233	119939	112668	109349	109238	127672	104764	119318	121495	112038	116323	119158	144324	127656	120976	125800	105993	118966	127128	120158	115026	118795	135851	114252	118985	120636	122276	103023	113181	111197	114286	107084	124110	115733	113757	112173	108113	100911	111034	119989	126004	134082	112725
5.38_510.4504m/z	36039.6	40509.9	52609.8	42278.1	38398.7	27272	34973.8	46926.8	43831.7	51204.1	49347.6	61084.1	46751.2	46440.4	44807.2	45257.4	37921.5	42962.3	58870.9	41947	52962.2	57003.6	59131.2	72625.5	67365.8	63927.6	37388.3	39854.3	31862.9	38965.2	50741	50496.4	36368.9	38989.4	36703.6	39828	40579.2	45623.4	62060	52776	60677.4	46919	50336.1	37488.5	40979.6	36865.7	42716.6	48615.3	34907
5.39_779.6051m/z	77724.9	70974.1	57815.3	79994.3	19077.8	110709	70144.8	88203.7	48093.1	45089.8	81483.4	33138.1	59091	110510	69219.1	46973.3	94346.9	40582.4	80646.2	46480.6	65666.2	59232.1	37660.6	76712.4	41620.9	40627.7	51621.4	38571.6	63260	69019	50092.3	102043	49009.5	84668.2	23375.3	105427	148538	34561.3	78659.7	45137.7	19535.4	69133.6	59604.8	45755.4	60065.6	26346.4	106387	154086	59613
5.42_1226.8106m/z	573898	567193	576678	525036	662610	502631	592747	643049	676083	557465	647381	644184	665217	597526	701130	636689	538875	657065	796830	610928	728414	696053	629564	702382	684818	729697	534041	652158	763125	743341	546989	590496	624964	548889	594088	606387	659072	612331	696883	733628	553605	691989	568665	570562	576079	692721	657006	793356	622864
5.44_816.5896m/z	240189	237667	375880	208441	175940	262755	262689	301825	195979	194685	315952	187129	239908	193146	253388	198671	192580	237968	161770	236458	361718	249528	263913	219259	204139	199473	164695	209518	231484	351120	293920	295441	301016	205842	259198	220422	228038	219611	232479	228413	199396	254627	283377	230504	164473	248093	255824	177443	195424
5.50_1208.8003m/z	647167	639151	638352	569740	697399	586769	708963	638741	648351	656922	699771	706036	620073	620742	751883	714187	664858	808570	864815	665710	865384	825632	684912	684588	754914	773202	612304	681171	800723	751320	598264	669881	673044	595498	726874	675034	690176	679588	740830	706293	548403	667310	784191	646907	646026	858610	759180	792800	679104
5.52_1192.7828n	1.14012e+07	1.3205e+07	1.16898e+07	1.03585e+07	1.28341e+07	1.12425e+07	1.29344e+07	1.00754e+07	1.27377e+07	9.94125e+06	1.09161e+07	1.15412e+07	1.07209e+07	1.11149e+07	1.26295e+07	1.18071e+07	9.93814e+06	1.16859e+07	1.35316e+07	9.99819e+06	1.2401e+07	1.1935e+07	1.05936e+07	1.15312e+07	1.123e+07	1.19942e+07	9.59276e+06	1.18924e+07	1.28982e+07	1.30655e+07	1.12867e+07	1.19503e+07	1.35762e+07	1.10302e+07	1.35346e+07	1.16505e+07	1.30088e+07	1.09927e+07	1.18155e+07	1.14313e+07	9.8041e+06	1.0988e+07	1.3045e+07	1.1817e+07	1.02378e+07	1.31047e+07	1.12194e+07	1.21954e+07	1.10838e+07
5.52_1237.8282m/z	213592	304046	276210	289503	277453	256702	294878	238996	251915	228373	303088	255959	265460	259032	285681	284645	212983	279277	325046	245507	286679	247472	245726	256476	298713	269853	219665	294486	287693	323674	261153	271424	286982	294971	367769	259247	275969	296689	262423	301154	219168	278362	310600	318106	251539	295243	267409	299343	251513
5.52_1238.8410m/z	1.11849e+06	1.39876e+06	1.19091e+06	1.30014e+06	1.17632e+06	1.12809e+06	1.28413e+06	995626	1.38535e+06	1.00409e+06	1.22792e+06	1.20891e+06	1.18316e+06	1.16419e+06	1.40066e+06	1.26245e+06	1.11495e+06	1.22526e+06	1.52951e+06	1.09453e+06	1.37747e+06	1.29698e+06	1.13448e+06	1.243e+06	1.28658e+06	1.35168e+06	1.11021e+06	1.32397e+06	1.27159e+06	1.37815e+06	1.12071e+06	1.22906e+06	1.32559e+06	1.05452e+06	1.65357e+06	1.20769e+06	1.34833e+06	1.23813e+06	1.29635e+06	1.28304e+06	1.07466e+06	1.24011e+06	1.45854e+06	1.30878e+06	1.18536e+06	1.38723e+06	1.32707e+06	1.36396e+06	1.25321e+06
5.52_1251.8442m/z	152278	252485	180771	252541	259943	201422	237653	164146	193070	174329	234834	233386	189216	186679	215567	226632	182877	201057	236385	203457	190659	197740	188431	210835	252680	223964	169391	245527	226139	247675	201620	205041	218831	201036	308477	200073	218372	236190	204223	232135	158172	219253	244961	245574	172813	243171	222948	228027	202185
5.52_1252.8569m/z	1.02575e+06	1.19764e+06	1.03521e+06	958922	1.14456e+06	969678	1.11698e+06	846694	1.11479e+06	893378	1.07239e+06	1.02854e+06	967547	1.04078e+06	1.21509e+06	1.16638e+06	947316	1.10521e+06	1.28092e+06	952924	1.11009e+06	1.10134e+06	895721	1.10248e+06	1.11306e+06	1.1522e+06	939665	1.19981e+06	1.14619e+06	1.25065e+06	1.01714e+06	1.056e+06	1.13264e+06	970714	1.31339e+06	1.02967e+06	1.11104e+06	1.13478e+06	1.0973e+06	1.10712e+06	926722	1.05811e+06	1.19899e+06	1.12217e+06	1.02936e+06	1.24283e+06	1.13299e+06	1.20393e+06	1.06775e+06
5.52_397.7542m/z	325.552	3103.6	593.889	29937.8	8365.22	1935.83	994.722	992.453	1439.71	2565.53	20548.3	14504.5	5505.43	6908.92	2888.11	3665.8	5599.19	3494.68	4474.2	19735.8	5196.02	7755.3	4282.41	709.805	5828.86	5905.08	3351.84	24501.6	3751.17	878.117	525.947	542.831	1925.22	3635.39	42182.6	1015.54	552.412	33904.6	1725.86	15917.8	9482.37	22229.3	7967.73	15922.3	2957.12	4711.64	9298.44	9531.05	22038.1
5.61_806.6470m/z	1.3547e+06	1.03949e+06	1.80331e+06	1.50588e+06	799677	1.21751e+06	1.11346e+06	680064	772016	748585	1.01962e+06	900961	942572	763104	1.40222e+06	1.29132e+06	1.7163e+06	845478	1.41386e+06	1.34107e+06	1.02268e+06	1.13637e+06	1.03181e+06	1.10093e+06	1.24846e+06	714930	1.02961e+06	945095	1.28201e+06	1.83233e+06	1.24136e+06	1.1218e+06	881187	1.17662e+06	1.466e+06	1.33102e+06	723518	1.1612e+06	1.9263e+06	1.41251e+06	1.07175e+06	1.22946e+06	1.56993e+06	1.28333e+06	1.31485e+06	833647	2.4334e+06	1.26792e+06	708907
5.63_367.1951m/z	35590.4	37274.3	39012.9	34744.8	35917.7	33298.8	36909.4	40360.9	33474.9	32880.9	32479.5	33848.6	37546.9	31477	34492.6	40715.9	37405	30783.3	43734.2	32952.7	31388.1	33496.3	32151.1	30015.7	37125	37587	38090.1	27919.8	42440.4	33919	37998	40707.5	35290.4	33390.5	29797.3	40075.4	33232	39510.5	42412.4	35749.8	34041.6	36614	39381.2	36224.4	34611.2	31756.7	38936.1	34968.6	35337.4
5.63_422.7623m/z	195267	163787	189804	154458	148875	142982	171487	154119	133976	156491	155117	126551	156276	123192	157096	160005	171647	122367	180240	166049	141103	169622	132067	130416	137194	138118	135110	110598	163297	155322	191591	185131	157107	152267	140028	169913	108172	178391	189921	162622	140562	160956	174670	137493	163097	139640	179382	136085	156577
5.63_423.2640m/z	121393	99393.3	120942	98350.1	88748.9	91762.1	109297	94956.5	98158.4	98369.6	97386.8	88464.6	102858	94386	107169	101239	110686	92293.9	112253	105705	93121.7	105830	91434.7	94349.2	96805.6	86924.9	97492.3	70725.3	111860	95192.4	108559	117428	103994	97566.2	98812.4	114708	86315.5	107439	122837	104133	95722.4	102600	111817	96122	113420	94211.1	112434	97722.3	100584
5.63_990.5403m/z	60272.3	67814.6	43747.2	50208.4	55131.6	54464	70989.1	84796.1	81742.2	76774.2	84100.9	88592.7	88729.9	90190.7	75311.9	81909.5	106327	42193	65209.4	34880	54849	58777.7	60729.6	47811.9	45620.6	58663.7	57099.3	49092.6	36383.4	68675	64010.8	43098	59180.6	45945.2	49999.2	57077.8	73097.8	87934.5	94109	76745.1	115311	76952.3	80779.9	55612.3	92819.7	58862.9	65405.2	64520.8	61036.3
5.64_1000.6012m/z	2.83195e+06	2.19881e+06	2.9797e+06	2.20936e+06	1.42544e+06	1.60742e+06	2.19548e+06	1.90442e+06	1.514e+06	1.53235e+06	2.19714e+06	1.32613e+06	1.96566e+06	1.5242e+06	2.22157e+06	1.65832e+06	2.53103e+06	1.50181e+06	2.42216e+06	1.88232e+06	1.81386e+06	2.20982e+06	1.86024e+06	1.56867e+06	1.94995e+06	1.46708e+06	1.57276e+06	1.17984e+06	2.41845e+06	2.13945e+06	2.59419e+06	2.79494e+06	1.88835e+06	1.87359e+06	1.58188e+06	2.31904e+06	1.0354e+06	2.44585e+06	2.57521e+06	1.68259e+06	1.40742e+06	2.18252e+06	2.36254e+06	1.92699e+06	2.01635e+06	1.54921e+06	2.18491e+06	1.72146e+06	1.45788e+06
5.64_1231.8333m/z	123590	82895.2	133439	95194.3	51122.4	81949.4	128222	115904	75977.1	120107	93685.3	52183.6	102832	77914.1	78963.9	64328.4	90097	46630.8	65050.7	44936.6	91283.8	84201.2	60596.2	31932.8	33808.6	61825.9	73209.4	53467.7	98772.8	82992.2	132241	158970	84026.1	137084	63589.4	108292	50401.6	83302.8	138048	75924.5	50372.9	111402	98710.7	46468.8	58939.6	77745.7	77498.5	52440.3	64253
5.64_825.5439m/z	213435	172175	347150	179382	134958	165501	204538	165847	114048	166098	170689	101088	164992	155872	167217	109633	190044	132476	173001	154005	149576	166362	125637	134981	133020	118045	130106	94431.6	184202	136711	324469	355896	129968	161956	207890	247478	84588.7	247751	230905	143925	101018	268065	200721	145697	122635	110615	223372	140826	137254
5.64_826.0452m/z	139212	79815.5	319802	90863.5	48234.5	64248	108881	79461.6	42913.9	77800.6	110930	38454.3	104911	49582.4	82227.9	97487.2	138100	45887.6	106408	99571.4	83845.7	90848.5	65839.2	60778.6	77531.9	45578.7	51148.8	25624.7	91977.8	72743.1	256732	217729	53685.4	82030.6	84793.8	124068	22440.1	157275	165733	67197.5	35946.4	163550	129004	89577.2	71220.4	59854.1	133677	74111.2	61030.6
5.64_890.5240m/z	409376	343775	412596	304339	318880	320139	373033	396546	314704	351088	364850	306100	379139	345493	411138	348290	426852	329433	377041	384921	321114	382315	331041	342318	362527	341829	349100	281427	407458	373864	403298	410628	329294	354429	348053	365823	305357	409890	449534	366280	355470	348012	411025	376839	374786	368922	372817	364398	331188
5.65_770.4824m/z	189031	161020	208757	162179	117643	144046	175267	147572	115123	135831	167798	113979	158128	126447	163439	143024	168857	121719	162498	148307	138526	170322	142043	126086	145825	120314	135522	109976	175789	163602	184237	192736	134232	159317	142101	173996	103082	185473	188669	154608	130593	174940	170516	141226	139691	109211	165114	120928	116725
5.65_774.0467m/z	199677	183323	160904	137640	153164	194317	196676	183592	152344	155488	119581	99741.7	195604	156619	199719	174228	201395	173129	176969	138092	167336	176343	148665	123038	153967	152406	163257	133368	163611	173439	203813	176636	158207	136655	145788	188434	149232	206087	216750	214749	162100	208708	213722	169248	168389	166531	197281	144118	164649
5.66_805.5638n	4.72298e+08	4.32447e+08	6.16199e+08	4.80008e+08	2.93626e+08	3.95889e+08	4.34357e+08	3.85284e+08	3.11888e+08	3.67026e+08	4.6718e+08	2.70848e+08	4.05869e+08	3.12741e+08	4.24771e+08	3.69193e+08	4.61576e+08	3.36925e+08	4.30676e+08	3.60323e+08	4.06289e+08	4.10658e+08	3.91128e+08	3.20742e+08	3.9134e+08	3.18933e+08	3.32131e+08	2.96492e+08	468169311	4.89568e+08	4.93967e+08	5.27305e+08	3.30072e+08	4.21408e+08	3.66744e+08	4.47454e+08	2.35048e+08	4.94533e+08	4.78963e+08	3.9446e+08	3.02231e+08	4.76056e+08	493477214	4.07361e+08	3.91426e+08	3.17405e+08	479650238	3.16178e+08	3.20581e+08
5.67_722.5484m/z	551924	659488	536879	575868	661969	793749	623211	695137	663782	743488	642464	630892	670761	749611	613375	807429	755284	694871	596883	592495	653513	622933	636212	687775	597280	699769	673875	667423	596484	641836	601176	530607	593824	607531	645764	742534	766578	718069	587031	784846	804104	654482	639334	701350	658380	718949	679217	684595	762854
5.67_764.5571m/z	919351	1.74169e+06	1.59372e+06	1.23915e+06	838633	1.21961e+06	1.10748e+06	1.75562e+06	1.5893e+06	1.10009e+06	1.55385e+06	1.17502e+06	1.30875e+06	935793	1.16971e+06	1.17673e+06	1.18339e+06	1.42732e+06	736124	1.67349e+06	2.04978e+06	1.10226e+06	1.29127e+06	1.12445e+06	1.09809e+06	965851	1.10433e+06	1.96455e+06	1.19405e+06	2.10198e+06	1.15567e+06	1.11375e+06	1.57987e+06	955616	1.36728e+06	1.17388e+06	1.32458e+06	1.8108e+06	1.20649e+06	1.96092e+06	1.12312e+06	1.12451e+06	1.48954e+06	1.26322e+06	1.12889e+06	1.20443e+06	1.28349e+06	1.46279e+06	1.15219e+06
5.67_807.3822m/z	218705	172810	246284	177149	126946	193081	180349	196274	120693	187980	183358	123539	166981	159424	206579	164875	163846	143112	170186	151679	140327	127064	135681	115112	155464	155141	158057	74625.2	186265	160181	219886	193989	85846.1	180545	154768	130380	121800	219678	203871	183696	125998	190834	225165	190036	131636	143896	183321	154577	135429
5.73_784.7294m/z	21052.4	23450.2	5673.54	9898.97	21215.1	8713.99	16535.1	13099.7	15464.2	10443.2	16660.3	19461.1	18478.4	13962.7	16550.5	17328.9	9320.56	13492.4	15828.5	21184.4	9225.34	17719.1	13613.3	14457.9	19631.5	21095.6	16706	18691.2	9890.54	7589.71	9915.98	11805.3	22199.2	11416.7	17588.6	14546.8	20532.8	18459.2	19390.8	15866.2	11106.2	13412.9	17120.1	17077.5	18598.3	18747.9	12910.2	13353.1	12994.1
5.78_962.4985m/z	44503	67396.7	88678	57441.8	58783.7	63398.3	87730.3	51274.3	94571.6	52442.8	81519.4	59847.1	80758.3	85216.6	65945.6	69160.6	41327.7	75878.8	62306.1	52231.8	63620.8	53824.9	39997.5	70397.1	61515.4	59038.2	50757.9	69821.6	37265	68182.9	91757.5	81921.1	70735.3	66031.4	82746.7	108437	57913.7	84533.3	56501.6	76864.5	85061.3	59329.9	53895.3	59961.1	68612.6	57409	51878.3	50141.6	43813.5
5.83_805.6215m/z	151928	137180	212511	183143	58632	203168	137829	142686	123414	158411	187165	93702.5	121661	157856	179717	77168.9	169906	91953	116550	111338	123068	208811	136656	180916	100223	81072.4	129676	52261.6	121552	135646	150472	357235	164808	136269	89624	276743	197383	99933.2	167568	117627	56196.3	132693	130415	128918	134526	88629.5	198771	216809	142035
5.92_766.5740m/z	1.43112e+06	2.3531e+06	2.50464e+06	1.85791e+06	1.55289e+06	2.15772e+06	1.81264e+06	2.08774e+06	2.85959e+06	1.69403e+06	2.92672e+06	1.99784e+06	1.93933e+06	1.09593e+06	2.00359e+06	1.73614e+06	2.23767e+06	2.12584e+06	1.193e+06	2.48949e+06	4.31541e+06	1.7997e+06	2.14976e+06	1.96163e+06	1.68844e+06	2.63032e+06	1.74899e+06	3.12891e+06	2.11565e+06	3.37168e+06	4.59837e+06	2.86166e+06	3.21858e+06	1.46548e+06	1.87901e+06	1.45005e+06	2.72693e+06	4.20989e+06	2.30016e+06	2.60339e+06	1.77604e+06	1.8087e+06	2.38298e+06	2.34626e+06	1.61737e+06	1.92704e+06	1.92881e+06	1.83278e+06	2.71957e+06
5.94_813.5437m/z	196258	199457	234240	242077	163724	242170	203112	210916	154555	208158	237551	184222	186436	186867	201502	219075	186104	192281	215428	184857	227210	217005	212224	177507	171229	169415	157087	191805	241310	259730	211304	226504	183067	204930	201210	248591	218991	196641	198535	226982	146475	228966	226326	203285	190688	185512	264181	229627	213742
5.98_826.5995m/z	191801	173807	247982	201349	169530	238987	212317	226975	219895	215780	233939	254074	232070	283670	283242	225631	238640	264210	167693	181339	221008	212746	259194	184396	181529	203241	191932	195806	163795	304389	181908	260970	225982	163338	222845	307374	255625	199099	177255	273156	190257	245611	262843	240649	219453	233085	235963	228714	249198
6.03_764.5247m/z	2.19105e+06	1.85794e+06	3.24298e+06	4.16074e+06	3.59022e+06	681800	2.35814e+06	2.37656e+06	868215	2.20921e+06	1.85987e+06	1.74819e+06	1.0343e+06	1.10747e+06	1.02507e+06	2.34511e+06	2.46695e+06	2.1162e+06	2.82023e+06	1.96574e+06	2.29161e+06	1.57262e+06	1.38752e+06	1.07845e+06	3.13776e+06	1.81611e+06	1.74605e+06	1.3527e+06	3.56984e+06	2.62559e+06	2.91653e+06	6.05022e+06	1.22891e+06	2.05885e+06	1.73969e+06	1.07748e+06	709294	3.78288e+06	2.10054e+06	1.71092e+06	1.39568e+06	3.06167e+06	2.82087e+06	1.42944e+06	1.57332e+06	1.31008e+06	2.48641e+06	1.25113e+06	1.5947e+06
6.04_1546.0819m/z	356668	220876	815417	1.29226e+06	430639	16239.4	349875	319061	27744.3	332416	322158	120794	17322.3	132284	101224	343208	398795	308255	433485	245196	507336	137125	136180	37092.6	776318	136366	69362.3	171153	812263	636858	591557	1.65002e+06	62093.9	237866	229932	80906.9	4205.95	1.13685e+06	276783	232689	48547.4	836438	706445	113635	245812	73160.6	566073	57972.3	180643
6.04_745.4791m/z	837310	856595	802148	767174	738646	869985	844178	829317	806724	823265	807673	729278	809840	840610	789974	799340	790388	800309	762884	743154	811635	829815	873519	779832	873163	823332	726692	846092	839291	813463	865248	833532	819572	771670	817785	858456	707025	863710	805313	820301	714786	768777	877666	801044	864729	758431	837192	818479	802063
6.04_866.5235m/z	730256	702108	655693	624290	613033	656173	674391	682096	705639	605349	631059	611332	680285	748842	711349	708040	666466	719577	649543	623437	653685	661472	653063	637948	672405	661402	632900	688205	643315	663682	707849	654482	710574	611375	613335	699875	614677	710876	665558	630715	614705	649335	740369	643698	780332	633786	675597	671054	647493
6.05_1184.3448m/z	80676.3	119619	169042	94484.6	3545.36	74872.6	78358.3	52572.3	52975.1	35540.7	136861	3763.38	42670.8	138475	200446	70554.9	68369.4	130775	66457.8	25640.4	153872	128231	101738	29418.9	201426	85188.8	21794.9	114089	66091.6	122773	47598.7	137697	15957.3	57264.5	107746	139030	16699.6	233581	100104	9319.01	14526	166008	188293	55253.8	145135	43837.1	111342	36203.9	42186.4
6.05_1184.8467m/z	242131	329589	430941	322957	84619.2	166457	162374	184199	109248	151957	285103	70652.8	171060	309974	294255	223710	222244	215192	123447	131146	380419	210464	224444	80359.4	272017	120211	64164.6	275444	183512	350745	174126	348543	78797.4	188485	211590	329325	57684.4	397443	187850	179308	62243.3	382369	400440	183713	294137	64515.8	317013	182926	178079
6.05_1185.3487m/z	144305	129010	221231	177448	41398.9	74068.5	47389.2	95779	78074	59679.5	150983	48453.9	87306.6	153338	199296	108297	101373	119603	112656	80954.4	179039	107967	134404	33237	152848	93854.2	69644.5	203479	231133	352724	93588.4	131766	19263.8	26120.6	119141	207136	1591.38	271044	125228	79107.6	23606.5	291093	216269	62399.4	119813	2555.14	161438	84013.7	76515.4
6.05_1192.8302m/z	279278	358523	528572	476961	128865	253814	290708	293348	191251	179442	327160	116858	269449	447712	396706	284839	237666	292071	287553	167028	414974	359303	337662	209185	332120	230020	161079	383627	351024	367782	328900	430950	127042	244533	298959	453110	73360.4	568255	272283	248634	125361	458734	533776	250777	481161	148341	466897	272721	306306
6.05_1193.3318m/z	140053	212984	338609	275698	109243	126571	204345	192854	182329	145446	248669	81119.6	139762	268595	264340	158310	79859.4	131027	122132	87198.9	223172	162862	175571	122927	199048	88053.2	6498.06	224118	207673	286138	161690	214407	121717	181472	218117	187956	34780.9	347916	184627	112167	92577.4	332923	290256	135701	267225	80600.1	254973	128128	172296
6.05_1195.8385m/z	534069	553465	621070	506675	202530	388346	479504	320760	282446	314445	406980	252157	346804	584638	486476	404942	325859	410754	334802	274337	624120	572976	506727	383088	574847	261981	189701	517280	495267	503198	541351	495341	287603	389008	405476	495033	166371	553538	433963	406711	213639	533283	601571	370294	575337	239603	551321	396488	327232
6.05_410.7624m/z	379541	375919	377055	359075	271758	333845	363278	325985	299231	309645	340785	278509	324928	377155	349426	314091	323947	340843	353464	275295	384881	351864	346388	310002	361443	305512	269236	359429	366263	353356	349424	348487	304668	310636	361453	378583	271758	390545	331673	319637	269494	390632	410698	326433	395578	288582	412359	343706	326874
6.05_411.2640m/z	208059	183834	201412	183660	155334	182985	189891	171117	175322	172134	181330	152491	170534	187018	190162	175813	175792	180257	170914	161095	200732	194660	185583	155141	197030	178454	151980	193096	179071	190179	191084	186333	177537	172807	174476	190393	153344	200945	182746	170346	157003	191700	211900	180729	204830	160687	212707	179916	177473
6.05_767.9815m/z	512692	535803	640456	617319	315107	384032	453143	359021	313053	404805	487587	282719	406784	527330	514942	402407	390525	436585	361655	342060	536838	461166	509464	366008	531968	364350	310104	478759	449516	587832	439848	524945	338380	432645	442051	521967	264851	622500	452469	395154	290276	649854	606444	389836	525360	300881	564917	364335	399721
6.05_804.6424m/z	474345	382332	458542	397402	311208	485777	538113	366732	266172	374863	544474	418004	354730	373191	509711	416661	401837	421872	445944	363837	493797	336233	478571	357461	490869	382284	327718	392219	314987	364096	477958	381733	387609	340797	449755	420750	336179	456233	527761	415917	338141	408259	524294	499031	394248	336338	497363	358971	361665
6.06_1563.1216n	4.41541e+07	4.7511e+07	8.52328e+07	9.06064e+07	1.56677e+07	2.66821e+07	3.75457e+07	2.625e+07	1.93255e+07	2.87921e+07	5.26397e+07	1.55771e+07	2.82456e+07	5.50359e+07	5.29432e+07	3.18022e+07	2.75621e+07	3.19748e+07	2.75876e+07	2.07816e+07	5.4834e+07	3.97174e+07	3.93917e+07	1.94951e+07	4.89196e+07	2.33189e+07	1.72246e+07	4.69848e+07	4.40092e+07	6.58598e+07	3.56078e+07	5.67308e+07	1.91723e+07	3.27872e+07	4.32687e+07	5.10579e+07	1.12329e+07	8.88286e+07	3.1179e+07	3.16254e+07	1.3051e+07	8.50698e+07	7.3019e+07	30268385	5.2643e+07	1.68245e+07	6.34271e+07	2.61327e+07	2.54633e+07
6.06_1586.6101m/z	164530	205431	484451	436292	46574.1	101004	166742	97790.8	69070.5	116209	294522	52797.2	131640	379538	192626	140924	117461	136230	128204	53830.3	207455	149733	155680	58364.8	177182	63189.5	21049.8	225608	210955	237175	166871	257766	61128.5	103820	233902	268671	21928.9	404572	152730	182003	31445.3	381275	329848	113103	301809	35240.9	227264	93692	97706.3
6.06_782.5714m/z	7.57989e+08	7.84393e+08	9.7267e+08	9.88141e+08	4.82173e+08	6.00477e+08	7.12654e+08	6.11249e+08	5.07236e+08	6.60424e+08	7.8568e+08	4.87663e+08	6.26908e+08	8.17668e+08	790790474	6.77504e+08	6.48056e+08	6.778e+08	6.25566e+08	5.34437e+08	8.10259e+08	6.81548e+08	7.02811e+08	4.92569e+08	7.81836e+08	5.47503e+08	4.81658e+08	7.37106e+08	7.34523e+08	9.12448e+08	6.62415e+08	8.28465e+08	5.18192e+08	6.69243e+08	7.13603e+08	836998939	4.13458e+08	986309308	678802816	6.68269e+08	4.46489e+08	985169750	9.39469e+08	6.27213e+08	8.23364e+08	4.94324e+08	8.80797e+08	6.02248e+08	6.18435e+08
6.06_783.8123m/z	564238	528993	763199	758763	380598	412779	524228	429979	344833	474021	657884	310640	465747	575193	629043	485139	500934	521920	412422	346165	532256	404725	459410	284882	591183	373921	365623	511342	575917	627002	507230	619884	396905	441858	514212	638135	294617	858708	528625	479065	321379	860963	679093	419359	631220	340809	552474	384042	456500
6.06_793.5782m/z	783962	839358	981850	884049	540794	721438	778788	824450	802463	674779	918941	525053	670950	649186	770101	664833	652665	701698	507946	822439	1.30263e+06	800603	997262	730523	611919	754729	569343	1.01236e+06	771281	1.01499e+06	726453	833439	1.05639e+06	615602	730412	853270	676709	945745	683870	762952	480205	710567	770573	734354	786886	782332	826262	739546	939320
6.06_794.0617m/z	229189	280225	217540	156425	114045	166471	157372	164926	142108	218443	172811	103762	204612	238690	296483	225712	214092	163307	183937	172830	277971	158715	237922	228031	237501	166458	133481	217548	240367	292545	201874	268433	145753	142860	144543	256700	106685	283438	154075	218335	129076	287913	227172	170517	255944	151399	216195	167856	158739
6.06_975.5944n	8.13606e+06	7.94955e+06	7.81672e+06	7.29492e+06	6.10523e+06	7.04549e+06	7.49918e+06	7.0145e+06	6.35235e+06	7.14974e+06	7.63793e+06	6.05648e+06	7.27204e+06	8.25723e+06	7.93867e+06	7.43949e+06	7.40039e+06	7.39256e+06	7.09916e+06	6.52558e+06	7.75159e+06	7.48159e+06	7.50571e+06	6.31703e+06	7.8967e+06	6.65849e+06	5.95006e+06	7.6304e+06	7.48592e+06	7.85545e+06	7.41341e+06	7.62617e+06	6.36603e+06	7.2273e+06	7.39814e+06	8.30531e+06	5.34619e+06	8.13719e+06	7.56663e+06	7.21152e+06	5.84352e+06	8.08824e+06	8.42543e+06	7.23834e+06	8.12645e+06	6.04843e+06	8.08165e+06	6.90528e+06	7.09694e+06
6.10_1540.1294m/z	154658	160459	164765	975406	17904.5	86218.6	151884	18792.4	18242.9	226931	686716	19345.1	152120	425036	233390	66480.1	78329.4	34960.8	142919	79952.9	130198	256972	166477	10138.8	113196	41568.1	22855.2	141089	373448	184124	75890.9	418826	5232.1	250323	433004	213586	23026.6	760710	66899.5	366771	40852.9	704302	488932	291968	27642.4	37815.2	409979	40213.6	31193.6
6.12_722.5094m/z	129427	283744	212475	170498	164186	198326	143171	156767	280095	188701	251134	196184	202480	118862	159413	168331	228288	147437	110803	291723	455454	143711	253540	199346	206101	275375	199479	298128	187220	311897	349947	170302	364505	117476	188375	125503	212584	371287	197759	222829	144248	143755	206794	180278	166649	211652	224718	304670	204106
6.13_755.6043m/z	422378	461900	458876	643657	277211	721202	457894	490620	381718	489148	590667	426353	405895	518596	533758	408864	519986	413473	464281	392565	566104	540473	439487	449040	371894	362785	427949	457862	594393	594430	421030	701270	355349	582870	461063	738170	781219	481691	432499	478264	362120	492756	573145	534375	417396	380556	660029	615336	635041
6.15_742.5748m/z	138226	205637	338333	224704	140546	407020	356289	313899	336142	296909	341907	245546	399840	130354	256988	206161	222389	399373	88971.6	240324	304482	292943	285305	402028	245758	392865	409046	332065	263244	344490	374679	272619	291051	221013	215651	210006	561130	269601	225735	259422	333526	224793	244170	425998	200579	250435	182175	257864	309593
6.21_533.4557m/z	46175.7	45874.4	41059.6	31540.5	44370.8	40551.5	41512.4	38106.2	42658.4	42443.1	40165.4	43641.6	38432.8	44978.6	42358.5	41608.2	37937.7	50911.4	48359.1	47939.4	45447.4	43447.9	42297.3	48913	47401.3	42274.3	42795.1	46738.4	51368.8	41809.3	45504.6	31217.1	44892.7	36610.9	39074.9	39656.2	41327.5	42847.5	51115.2	43462.5	45518.7	43077.9	54713.6	27893.8	39284.3	53054.4	40870.1	52382.8	51118.9
6.22_781.6248m/z	633146	551374	688321	638315	299591	732128	439071	480236	327547	574827	620346	411705	394171	446010	560445	437606	366576	364232	386959	401868	575444	596279	503632	478500	521042	379462	378992	485252	490719	569245	544949	764722	525430	565114	445092	756390	499630	562421	526393	461235	339617	693338	507511	421235	355072	336159	499004	458499	515996
6.23_610.5771m/z	44612.8	4967.62	3770.69	16782.3	6335.44	6264.58	8378	14721.5	38285.4	54512.3	23179.1	30970.2	8240.15	10987.7	7187.08	9777.8	22935.3	10738.5	10792	5564.08	10954.1	8191.36	3846.83	6876.25	5527.28	10113.7	5301.69	6129.72	8438.41	6674.77	5356.3	3571.71	27375.8	5531.34	165007	35802.6	21908.5	22993.2	17713.1	10895.7	12883.9	10086.6	10626	27029.7	53950.1	32304.3	6468.29	11687.1	7434.14
6.24_838.5125m/z	37704	24807.2	22284.8	12697.9	31166.8	13381.3	15453.8	34604.7	27201.9	25038.9	29379	27249.8	31162.1	30930.5	34165.5	32238.7	29466.9	25586.7	27836.8	21396.4	22371.8	23916.3	22803.3	26712.9	22520.9	33713.6	39256.9	27339.7	29774.2	24122	20776.8	13277.8	31607	29681.2	25494.4	19122.1	33689.4	29972.6	32795	30417.6	25397.1	24963.7	27578.9	32091.3	19857.8	37991.5	23085.9	32123.6	40181.6
6.26_781.0550m/z	127171	158481	68580.1	83064.2	77193.8	93374.4	71135.3	89256.5	87544.2	117011	88875	132289	107744	66129.6	120653	161024	102939	63684.3	74299.2	66437.1	57215.1	36566	44510.3	114383	76507.1	90411.2	76335.3	99189.3	49739.7	68512.2	96689.6	76775.1	131622	109192	113172	97612.6	107642	105266	96787.3	66531.3	96482.3	72977.5	64215.1	94245	106378	86485.4	59112.5	108804	87732.7
6.36_479.3326m/z	50790.6	54203.9	31278.5	34986.4	60107.6	32458.1	58363.7	51644.8	47539.6	40808.1	39969.7	52379	30631.2	62344.4	53829.4	42284	62253.3	58696.9	61914.8	45090.1	33174.2	47058.1	42218.7	46364.5	51529	41732	51146.3	43761.5	43250.4	34509.2	63604.3	38453.3	56800.3	45659.7	52929.6	34760.5	46347.4	54174	60302.6	62409.2	51816.6	41170.6	36495.2	48098.5	65671.9	52425.2	43938	59719.6	54610.2
6.37_974.5828m/z	288496	282665	208000	259186	345064	232794	298640	299413	315892	261062	296788	348534	330593	301969	293842	280849	291745	296593	281472	341005	287879	324970	271118	297108	229885	295335	301838	265647	323588	278190	251998	262868	338214	259742	311840	304091	333729	294035	333337	297576	331780	253341	261584	299040	278650	336763	295631	317340	316562
6.39_742.5743m/z	59277.1	109315	106067	142305	83248.9	89250.7	82333.9	133926	207733	82762	122477	92983.4	79040.9	55455.6	78519.9	105475	144313	80527.4	54941.4	98734.3	230172	58851	69987.9	116830	100026	357860	100457	146345	136226	107573	231558	77197.3	77112.6	68563.8	112141	65668.2	91934	277429	134457	96990.2	72815.6	76910.4	71150.5	113914	64470.6	99688.8	107198	104770	100351
6.39_802.6057m/z	38112.8	35178.3	49417.5	48145.1	41848.3	17629	27371.2	38324.3	40186.4	28950.5	45603.3	40932.2	29727.8	71902.2	41252.4	43243.6	36193.9	48725.7	42678.1	33341.8	37044.1	43860.5	39670.2	38352.8	56397.6	40395.6	26305.2	55966	39405.6	31056.1	44287.3	36772	47060.9	34552.1	38218.4	38366.8	38390.6	35082.4	34841.9	50920.2	48009.3	56117.8	38924.8	53700.8	49677.7	46936.7	47892.1	50997.7	56516
6.43_429.3737n	902521	831865	552907	809468	1.00656e+06	448659	830151	835628	827921	788710	574810	780186	494080	733895	790424	881898	999758	703984	1.01359e+06	764936	526291	670450	773045	740375	994536	998605	711175	930412	501999	741092	922109	553036	812797	646478	911331	738379	772239	817573	892227	696890	751120	780773	730583	740038	688050	669926	851095	954915	653131
6.46_529.4614m/z	12327.5	11703.3	11014.3	9562.01	12154.3	5420.11	9571.93	13977.4	13099.9	7164.41	13055	12807.7	8343.03	11568.6	14590.3	11635.6	8931.38	10301.9	11020.9	11035.1	7742.13	10664	7350.61	11773.1	10224.6	10356.6	9124.46	9338.44	13614.8	9170.73	11783.6	10171.1	12231.7	11057.3	9842.95	10897	11521.2	11436.8	13115.4	14011.6	10381.4	12175	9207.42	9548.41	9237.8	11280.9	9419.7	11770.4	7743.37
6.54_508.4976n	977065	833788	652669	747889	779049	660337	683627	686620	782202	669598	658370	746473	641876	694043	659635	662528	784968	686134	873071	833526	795616	875166	941057	891715	1.05678e+06	973102	1.05715e+06	959649	998499	928984	901467	763935	821607	708417	735496	702078	784582	679803	811449	638531	729764	608302	647763	781984	708388	768368	730551	960013	813172
6.55_732.6098m/z	37127.3	29853.2	50250.1	35160.6	28086.8	50034.5	28792.1	41502.8	31004.6	36908.2	40534.2	39596.9	64617.8	57050.7	47161.1	29637.8	50402.1	32983.3	47030	23477.4	45931.4	44070.3	48496.1	40915.7	23331.4	27670.5	36008.3	24249	41338.9	61960.1	34435	55892.9	32880.8	41437.6	26194.8	84493.6	72859.9	20877.7	20237.2	40130.4	39880.4	49519.7	42065.5	38567.6	37864.4	49616.5	61619.1	94612.1	41203.2
6.60_580.4943m/z	90736.6	80578.9	78707.5	64684.3	89199.8	77191.7	74114.9	80348.3	91904.1	64511.7	76309.5	89966.9	77306.3	79134.2	81013	79108.5	80013.5	79712.8	105303	91715.5	89062.4	84032.4	72130.2	76491.3	75476.1	88716.8	86473.7	73009.3	74324.4	87144.7	80970.9	75255	99315.1	81123.4	91787.5	88758.6	90915.8	78025.8	95885.3	84508.5	74340.2	75936.7	74435.5	67756.1	74644.1	89873.7	87291.4	92211.4	73134.8
6.71_528.3437m/z	27260.4	39197.7	34198.3	44542.8	24864	29140.7	34913.2	27318.6	25520.1	29746.4	43121	24523	36053.3	35038.8	31149.8	30800.7	21792.8	27249.8	23861.1	30427.8	34565.3	32112.6	36163	34107.4	35934.4	36043.1	34868.7	52760.8	34860.9	34282.1	30042.4	28789.3	28839.3	43548	40452	33451.1	30988.5	44214.1	31295.9	43031.6	29459.8	39845.3	31240.2	34848.6	28402.3	22965.3	42085.8	29873.4	20404.5
6.74_1198.3602m/z	30973.9	11965.8	8961.47	75355.6	7629.31	19210.6	23333.2	27494	15254.6	52964.1	75750.9	5297.71	14486.1	7667.3	11873.4	5039.11	8631.11	12074.6	4477.27	16360.1	8398.33	11730.3	10743.3	27288.8	10220.3	7492.12	8966.2	12506.2	15880.3	14443	14709.3	30097.8	11827	33822.9	33585.9	62324.2	33248.1	185713	28133.5	51687.4	3009.09	12171.2	10432.5	15739.8	8709.45	12804.9	27789.5	11323.7	15075
6.74_1198.8609m/z	29172.8	32953.6	38295.3	167180	28788.6	38146.9	47724.2	21125.4	22285.3	43216.7	116601	26213.6	37158.4	51207.7	44015.7	39554.1	10980.6	22938.8	30321.9	47837	32748.4	20812	37642.2	9394.38	40319.9	40177.9	32859.7	84212.6	28168	71700.1	13385.5	29244.4	14645.3	142543	94637.1	54515.9	25212.3	181551	26955.3	98574.9	12887.9	83873.2	41570.5	61646.3	22543.4	11753.3	62607.5	23496.3	13822.9
6.74_788.6958m/z	51313.7	88705	69366.8	132336	42112.4	61366.5	64966.7	50736.4	37355.7	74594.2	106487	27002.1	77263.4	60772.2	62188.1	31372	39212.7	39605.6	26553.9	33938.4	36551.5	39585	47192.6	24224	42943.3	42599.9	24718.5	35859.4	41153.5	34079.3	53567.9	91069.3	52544.6	119096	92299.4	33429.8	59316.6	109542	67907.2	119164	53336.6	77120.9	61761	54093.4	32510.4	28561.3	45359.5	28888.3	21561
6.74_936.5282m/z	262358	283995	283599	256878	291133	307725	351911	304781	259458	313942	320080	304361	289808	314854	264010	261161	279449	303742	316317	326004	292963	310204	300121	290013	294267	298384	276934	297130	294557	311484	265396	312900	286866	336936	309838	307343	271032	329862	315760	306729	266905	271407	289100	297214	256468	272072	307491	334016	275713
6.74_968.5669m/z	132240	140240	156286	164577	153332	174827	124947	155857	108538	163329	192428	128539	153387	158218	134286	135918	142170	128588	144223	184568	149547	140842	181208	145549	133545	161081	139635	170883	146924	163309	140242	141213	105724	166766	164656	160623	119464	158920	160829	206524	129238	130414	158317	162041	136247	136024	184631	140353	136505
6.75_1500.1003m/z	5638.16	11277.2	4943.45	263855	22139.4	8189.39	12324.4	4229.26	3147.85	29449.1	97040.1	12765.3	6313.28	8674.76	10737.2	66111.9	18908.5	16939.9	38304.4	23190.9	26778.3	20623	6795.24	37516.8	50833.8	30215.9	19591.2	14507.5	18819.2	27196.5	3561.69	19734.1	26869.8	101919	51630.9	6103.59	5860.53	252597	2106.72	36600.1	6256.05	192183	9299.26	37116.5	5236.59	4814.74	35139.7	14118.6	8955.77
6.75_748.5315m/z	3.71088e+06	4.11755e+06	5.94746e+06	4.50079e+06	2.79943e+06	5.20555e+06	3.69442e+06	4.17922e+06	4.21076e+06	3.81614e+06	6.08009e+06	3.29623e+06	4.15511e+06	3.8485e+06	4.17234e+06	4.02004e+06	4.24473e+06	4.25624e+06	3.10939e+06	4.01898e+06	6.44303e+06	3.45205e+06	5.25348e+06	4.44418e+06	3.62616e+06	4.08342e+06	4.13924e+06	4.28642e+06	4.24834e+06	5.87328e+06	5.10377e+06	3.8513e+06	4.16242e+06	3.33811e+06	4.27225e+06	4.6417e+06	3.99199e+06	5.0128e+06	3.63844e+06	4.90089e+06	3.5926e+06	4.55055e+06	4.75461e+06	4.43661e+06	3.91222e+06	4.57209e+06	4.94329e+06	5.09429e+06	3.53722e+06
6.75_784.8488m/z	246706	347115	339238	754563	249791	414095	450385	228994	251015	400019	710058	272992	316744	295868	316024	257638	187567	232960	259187	372166	423532	467417	493394	302693	390418	347049	272034	450716	238573	310185	192787	323433	202514	712153	538477	335328	261762	1.31213e+06	304114	748106	195366	476331	297112	320784	190311	148780	372916	268408	198634
6.76_788.7973m/z	25888.9	42506.2	27156.6	32990.9	37021.1	44176.5	52649.4	30057.1	21085.3	27538.3	26748.9	17683.9	50974.4	36947.8	22449.1	27127.4	21597.9	15430.5	10925.4	26463.3	16917.8	14972.5	20004.3	7700	29532.1	16138.3	27016.6	42652.9	29655.8	20193.5	28002.4	41008.4	29198.3	46365	37809	35558.6	21381.2	49881.5	49455.3	47139.9	19022.2	38663.5	52819.9	35918.2	24888.5	14286.6	26489.5	21123.8	17719.3
6.78_784.6705m/z	3.26734e+06	3.8181e+06	3.42425e+06	6.3953e+06	2.67338e+06	4.57707e+06	3.90447e+06	2.36987e+06	2.78125e+06	4.73761e+06	8.8275e+06	3.60664e+06	5.50239e+06	5.4881e+06	4.81744e+06	4.84258e+06	2.4678e+06	4.35026e+06	3.64941e+06	4.53516e+06	4.60225e+06	3.32778e+06	4.52079e+06	2.94593e+06	4.53841e+06	3.78445e+06	3.7848e+06	6.05907e+06	2.87347e+06	4.1975e+06	3.0309e+06	4.11843e+06	2.11164e+06	6.61211e+06	4.71993e+06	4.32462e+06	3.46032e+06	7.41545e+06	3.35057e+06	7.06529e+06	3.31178e+06	6.95998e+06	4.89348e+06	5.67833e+06	3.65327e+06	2.41718e+06	7.47318e+06	3.64093e+06	3.49472e+06
6.89_1176.7891n	4.30732e+07	4.77233e+07	3.22697e+07	2.78686e+07	3.71676e+07	3.33689e+07	4.93522e+07	3.18687e+07	6.77299e+07	3.20136e+07	4.13611e+07	3.45763e+07	3.79729e+07	3.75225e+07	4.96419e+07	3.43792e+07	3.37774e+07	3.34841e+07	4.82433e+07	3.19537e+07	4.01725e+07	3.82153e+07	3.39773e+07	3.89846e+07	3.50483e+07	4.48046e+07	3.30552e+07	4.07927e+07	3.74487e+07	4.29884e+07	3.45813e+07	3.7012e+07	46793149	3.75351e+07	5.21734e+07	3.57325e+07	5.05131e+07	3.91493e+07	3.95891e+07	3.41608e+07	3.26748e+07	3.58012e+07	5.42865e+07	4.65859e+07	3.21485e+07	3.42036e+07	3.17592e+07	3.67323e+07	4.07096e+07
6.89_1195.1602m/z	114713	142852	62901.8	39786.7	79817	56660.3	129920	49537.6	106434	57175.8	120216	60854.3	90566	87998	132413	67570.2	61919.3	71580	142349	39466.9	104696	73630.2	63757.5	72974.1	43499.2	123749	40494	112763	87789.4	145518	51995.7	72001.3	135412	83178.5	135478	73680.8	145124	98318.1	103005	83165.5	60087.2	98610.3	113639	160500	44247.8	68827.2	46428.8	58502.3	87516.5
6.89_1195.6205m/z	23174.3	22372.8	8601.25	7932.83	13372.9	6366.57	23389.3	5394.69	31465.1	7952.72	22507.9	10201.7	10233.8	10589.2	25907.6	7857.16	9463.99	12356.6	20057.3	8082.08	13668.9	8197.06	7201.02	4331.39	8993.78	18232.5	11803.5	10287.2	13166.3	22699.5	6194.57	13187.2	29640	14392.8	25419.5	12025	26006.7	16778.2	17658	12265	6040.08	11761.4	18516.1	24769.2	4985.75	15394.3	7931.47	7294.79	14505.1
6.89_1221.8335m/z	807333	870297	669421	606568	626343	665393	923419	632205	1.20306e+06	680528	940777	694280	784369	775737	1.0215e+06	695648	633596	635486	843000	638042	825424	782078	677356	712162	642261	802243	651272	724280	693987	859371	656966	738036	803391	739090	1.0277e+06	724303	941533	749780	772148	754632	667210	786681	1.08511e+06	942238	623427	674850	624252	720720	785396
6.89_1222.8470m/z	4.8068e+06	5.33788e+06	3.92089e+06	3.35623e+06	4.07792e+06	3.89255e+06	5.85106e+06	3.4739e+06	7.57139e+06	3.57493e+06	5.06371e+06	3.87585e+06	4.4436e+06	4.38839e+06	5.9734e+06	4.00263e+06	3.92713e+06	3.83501e+06	5.682e+06	3.73464e+06	4.85852e+06	4.32077e+06	3.97395e+06	4.37972e+06	3.91828e+06	5.0315e+06	3.74547e+06	4.67954e+06	3.88843e+06	4.98039e+06	3.97305e+06	4.23899e+06	4.88068e+06	4.20875e+06	6.04934e+06	4.09282e+06	5.61714e+06	4.51838e+06	4.45442e+06	4.07936e+06	3.755e+06	4.27628e+06	6.43835e+06	5.48539e+06	3.61841e+06	3.78748e+06	3.9141e+06	4.39856e+06	4.76215e+06
6.89_1235.8489m/z	648168	730818	569189	516421	527888	597687	736026	559332	936531	573704	794380	575672	685108	657089	714742	587564	527947	556299	736989	553117	702447	668525	619998	597316	555040	633646	536929	631798	569323	710385	545889	617166	649469	634078	827665	623461	746478	634413	615383	641573	549801	641003	859609	794150	534387	564092	583094	652155	681713
6.89_1253.8669n	4.87279e+06	5.37308e+06	3.81005e+06	3.28149e+06	4.04452e+06	3.88462e+06	5.77263e+06	3.54796e+06	7.50903e+06	3.53424e+06	4.98646e+06	3.88009e+06	4.25518e+06	4.22024e+06	5.66104e+06	3.9179e+06	3.73342e+06	3.83009e+06	5.39686e+06	3.76474e+06	4.74849e+06	4.38853e+06	3.92667e+06	4.34763e+06	4.04998e+06	5.07742e+06	3.78889e+06	4.65773e+06	4.24651e+06	4.93521e+06	4.04869e+06	4.30237e+06	5.04344e+06	4.30768e+06	5.93177e+06	4.02723e+06	5.5549e+06	4.42368e+06	4.29862e+06	3.89793e+06	3.67313e+06	4.203e+06	6.18222e+06	5.25123e+06	3.54161e+06	3.82118e+06	3.76723e+06	4.13655e+06	4.53575e+06
6.89_1371.8226m/z	181567	207288	226063	130860	123032	147344	365058	88151.5	441292	134695	287705	95334.4	173035	190254	334030	171598	155059	176524	285218	116182	272057	212965	192729	176677	155276	189154	132043	238218	194685	294453	109674	191509	175367	241032	289368	185433	265849	207389	154342	236264	106955	235527	435730	360029	157005	131047	151301	176672	184848
6.89_563.2279m/z	56665.7	65465.7	41138.1	35210.8	49264	43642	71034.3	41880.7	102980	42969.2	52900.3	43601.8	48840.8	50189.6	74409.4	48475.5	42281.2	43798.7	63339.1	39482.1	53932.1	49677.7	40590.9	43438.2	50186.7	54469.3	42376	52752.5	45012.1	58113.9	41170.1	44734.8	60088.8	47758.1	74580.8	47267.4	68027.5	52331	54469.5	53444.7	41190.8	57442.1	80713.2	67269.6	41346.9	45738.5	40138.1	39038.5	51780.4
6.89_619.2907m/z	108671	123699	83758.2	67918.1	94932.2	82764.6	134903	79941.8	187199	82586.4	114708	89050.1	100261	100126	134435	84269.4	87502.9	85505.7	126077	81503.1	104324	101762	84580.9	93305.3	88312	119176	78988.6	104220	97325.8	114757	93239.8	94477.8	121544	102492	140090	87693.3	127061	110005	106682	93989.3	86272.2	99381	147611	125624	78329.3	87034.8	84351.1	95681	99742.2
6.89_675.3532m/z	184804	230179	145010	121640	165009	140224	236600	136398	316039	140086	188703	150574	172172	162039	226433	157820	146059	160378	216071	137466	176236	163306	144326	169810	154292	189456	141465	190368	171902	189407	160665	168621	214575	169753	245014	161306	235323	171689	188793	165360	141186	159543	262650	221304	147043	157244	142944	154937	171362
6.89_731.4159m/z	254745	295247	202898	160911	228083	203972	316744	176008	416751	179415	255934	193920	233587	227037	307856	198653	192126	208064	300881	199193	242295	230333	201501	241460	215580	270913	195240	245763	220141	273347	214742	232243	275810	218281	311161	222303	304609	239735	241436	205756	200319	225101	345984	293421	192552	205710	200321	216533	234471
6.89_787.4792m/z	88723.6	100039	73853.6	54833.1	85827.7	66267.3	100713	69735.1	130977	63942.9	90716.5	66024	86261.5	81857.7	98806.8	82418.1	70201.9	74353.8	99009.3	69895.4	87324.7	79086.6	64898.8	70714.5	68652.8	85817.7	67006.2	91408.3	72163.5	91163.6	71721.7	74407.7	86397.5	69411	95251.5	68903.6	94002.1	75734.9	85251.5	72301.7	67980.2	76822.3	111749	103087	62721.5	66652	65957.3	70745.7	76261
6.90_1250.8699m/z	33201.1	28682	28251.2	18208.4	29880.9	19486.9	77555.4	71352.9	52603.4	41328.1	51856.8	39053.7	23316.9	27002.4	37150.8	21135.4	18575	26838.9	39669.1	21294.8	35554.8	51086.4	31908.5	33145.6	27636.5	40203.1	30331.1	43762.9	32548.9	30218.3	25219	25488.1	25267.6	52520	39981.1	48724.5	42183	51575.3	42765	27617.7	36470.5	30662.4	31767.8	31937.7	19375.2	26095.1	29961.6	29697.5	48088.5
6.95_807.6374m/z	850358	611004	760424	900981	403600	1.12146e+06	585562	806396	527855	640762	774318	441982	687129	1.23664e+06	952900	450484	705899	492236	810169	518100	547563	866562	601841	748988	435995	395314	580742	300587	560711	619909	615945	1.53549e+06	569833	683039	334738	1.59019e+06	1.25681e+06	363134	609206	481821	301902	748053	606315	664126	690519	425322	968570	1.16255e+06	833965
6.96_1252.8546m/z	62168.6	62029	67325.1	69671.9	72715	38905.4	33103.6	57884	55443.1	70225.8	39354.7	51247	44601.4	69135.7	50036.6	70008.1	38849.6	45850.7	53522.4	44336.8	70578.2	39598.9	43788.4	59464.8	40405.1	55024.4	51540.3	62247.2	41853.1	41981.1	35442.6	70699.6	59392.3	42702.1	73799.5	82013.1	59931.9	47778.6	42836.8	48975.6	47386.8	63555.2	43284	61500.9	47223.4	50717.5	53983.1	67099.2	37909.4
6.97_1192.7825n	550439	555262	596943	471688	676910	494931	569358	609524	499605	588949	615821	608582	542617	537094	633488	570591	557709	616591	717509	624659	654182	629164	483271	665602	656907	580104	590856	612798	663315	558742	580693	639350	612102	530952	530213	554365	529119	533070	715389	555747	572496	572802	577502	486204	536107	747359	617188	613080	650349
7.10_624.5895m/z	26164.2	8287.7	5343.89	15812.8	11283.9	5672.76	10623.4	9435.29	11326.1	14305	9380.34	11876.2	7877.04	8189.32	7428.17	6195.17	8604.05	8528.79	9890.09	10702	5446.28	6082	5684.04	6116.01	4456.01	7702.44	8220.05	7710.86	8379.93	6169.38	7517.74	9237.63	14997.2	6766.92	45894.9	11483.8	7923.7	11722.6	10537.8	8087.26	8330.63	8478.01	10552.1	7408.96	19284	12961.7	7064.31	8623.88	7139.71
7.14_614.4901n	166825	206322	272937	167269	171013	203662	288881	125858	186627	410417	141143	163518	262056	131230	143065	164498	185830	309687	145477	230607	126484	205640	125607	165116	284332	147060	471096	144649	223080	213672	150753	205980	189780	393314	223222	165047	181117	224062	545933	233525	169791	411675	187800	189811	190063	180618	195367	146721	246325
7.15_660.5508m/z	6329.85	6297.01	9484.96	4509.13	3533.1	5022.03	10349.2	2899.31	6461.34	18809.2	5868.76	3066.57	8807.33	3233.86	1322.24	6669.78	8658.46	14095.2	5346.41	9801.26	3176.21	8104.65	4221.4	3104.52	10925.7	3614.79	21206.1	3770.88	5448.43	6423.25	4799.56	3642.45	7203.39	14726.1	2718.49	4518.66	3646	10586.1	28289.8	9904.88	8751.81	21637.9	5534.28	7312.87	7298.12	6599.05	6954.27	6658.82	10860.3
7.15_674.5686m/z	3850.92	5811.24	7749.29	3393.24	3145.76	6370.48	8524.59	751.219	5489.27	16953.8	2128.77	1677.63	9479.33	1306.69	1403.38	3047.68	3802.79	5340.9	2541.32	5538.98	1157.26	2247.28	1584.26	2905.32	9335.14	3029.06	18246.5	3665.75	5163.1	5487.01	3347.18	5263.95	2653.02	10445.1	5566.03	3920.93	4090.62	6782.32	20655.9	5221.96	2191.8	14469.6	2309.3	1873.34	3535.54	3073.67	2551.56	1743.93	5583.38
7.25_807.4727n	54324.3	75184.4	80492.6	50710.5	31715.8	76030.8	42290.2	68840.9	60085.4	45615	73044.3	59238.9	52137.3	61362.6	55473.7	53726.5	48247.3	64138.2	35022.8	55684.4	103306	51813.5	89859.2	79617.7	52031.3	52825.2	75384.2	92995.3	53153.8	109632	68929.9	38124	70801.4	31527.9	43438.3	71288.4	66436	78102.3	47198.5	53909	51544.3	53968.9	77630	48376.4	74686.2	79428	73284.1	139644	51584
7.26_762.4783m/z	24110.7	33466.1	39926.5	29264.5	20760.5	40692.6	24490.7	26276.3	26969.7	23910.8	38993.9	30841.9	27275.4	29280.2	33784.8	28502.6	23588.5	37154.5	20058.1	30373.1	57067	25677.1	40454.6	33479.4	26523.5	22024.2	34537.7	37323	25803	51823.7	31101.7	25740.6	29191	20725.3	23564.2	29981.8	30428.7	48485.8	25487.6	32184.7	23848.2	29323.4	38942.4	24766.6	32794.7	32369.7	40788.5	63744.4	26554.6
7.27_583.5086m/z	108181	176398	235120	155761	77977.9	200095	123097	171867	137794	152124	233433	145236	146246	146180	191616	146279	138527	172342	101838	159638	364265	121734	245418	233621	153265	121553	193631	228358	150362	342037	161787	102715	150887	85122	138689	188908	163711	252598	119424	147418	140149	178224	243192	145164	176359	194265	203506	357416	136689
7.27_723.5215n	3.83334e+06	6.33788e+06	8.30166e+06	5.47922e+06	2.95012e+06	6.81097e+06	4.27095e+06	5.9275e+06	4.90891e+06	5.04905e+06	8.2584e+06	4.82246e+06	5.28746e+06	5.12892e+06	6.41313e+06	5.08357e+06	4.70908e+06	6.04197e+06	3.06821e+06	5.15693e+06	1.28704e+07	4.31691e+06	8.39591e+06	7.66681e+06	5.02231e+06	4.04538e+06	6.6149e+06	7.84773e+06	5.0086e+06	1.12265e+07	5.52776e+06	3.65215e+06	5.30817e+06	2.98865e+06	4.82225e+06	6.35298e+06	5.77062e+06	8.56134e+06	4.13311e+06	5.09964e+06	4.68449e+06	6.51906e+06	8.01303e+06	4.96889e+06	6.28502e+06	6.75896e+06	7.00271e+06	1.28246e+07	4.75274e+06
7.35_713.6559m/z	154990	145963	154385	152657	162563	154395	136234	155004	139434	166745	138556	154204	146887	138313	155071	133345	146910	133732	166799	135475	157172	166151	180228	161124	143850	159598	153077	158941	172046	183952	167809	172885	145250	149027	140804	173301	158111	129055	157022	141743	134409	135813	150234	123965	139371	150195	195801	171767	156290
7.43_732.5025n	3.16909e+06	3.55819e+06	6.32653e+06	3.08619e+06	1.97918e+06	5.38664e+06	3.18698e+06	3.68063e+06	3.56221e+06	3.74522e+06	7.37295e+06	4.08685e+06	3.97011e+06	3.89448e+06	4.6032e+06	4.03183e+06	3.00828e+06	4.64135e+06	1.92628e+06	3.6148e+06	9.2486e+06	3.52532e+06	5.9686e+06	4.63496e+06	3.31383e+06	2.6349e+06	4.21555e+06	6.17635e+06	3.33951e+06	7.50021e+06	4.13448e+06	3.0481e+06	3.90525e+06	2.25894e+06	3.90205e+06	4.62493e+06	4.91487e+06	5.2706e+06	2.84956e+06	3.72017e+06	3.39999e+06	5.07945e+06	5.83993e+06	4.17666e+06	4.10848e+06	5.48983e+06	4.92631e+06	6.4252e+06	3.50299e+06
7.46_682.5385m/z	250230	194211	185048	226789	221906	173105	201205	167446	169021	161541	159010	176825	180817	186334	146072	176475	202151	210853	267939	198068	151685	152738	136391	157202	200463	160332	170074	174585	177122	171069	216015	364358	185050	165442	190742	177623	166558	259703	318627	191153	176216	251659	183217	173127	163305	177394	183904	198448	159030
7.63_798.6007m/z	1.73082e+06	2.02543e+06	2.30997e+06	2.10255e+06	1.05861e+06	1.71194e+06	2.2052e+06	1.93363e+06	1.37707e+06	2.42808e+06	3.202e+06	1.30531e+06	2.64416e+06	2.54848e+06	1.70796e+06	1.85248e+06	1.36241e+06	1.50511e+06	1.44171e+06	1.92437e+06	2.19257e+06	2.09631e+06	2.92406e+06	1.62764e+06	2.40379e+06	1.50175e+06	1.93977e+06	2.33659e+06	1.41386e+06	2.04872e+06	1.85006e+06	2.11019e+06	1.24743e+06	2.4902e+06	3.64196e+06	2.10858e+06	1.57814e+06	1.93283e+06	1.67413e+06	4.30756e+06	1.79761e+06	2.02844e+06	2.47974e+06	2.64563e+06	1.35739e+06	1.50966e+06	2.51485e+06	1.93465e+06	1.51708e+06
7.64_1193.8476m/z	5256.58	17767.7	63620.2	40930.9	46977.4	65030.7	29223.7	36538.7	36758.8	50874.9	76902.3	28261.4	70309	30343.7	34431.7	32259.2	13066.3	64796.7	27516.9	34164.9	29563.2	14806.8	22226.4	24414.5	15842.4	39531.5	2847.95	33560.1	24696.9	9368.1	20238.1	36657.2	13682.6	76536.5	120663	81092.1	28194.6	125828	34193.2	52222.3	17515.8	62151.1	28464.1	28995.2	18723.4	35565	80919.3	12538.4	19031
7.66_497.3451m/z	33653	40724	33595.4	34947.4	42012.1	37031.7	37750.7	36049.3	53607.8	41819.5	40433.3	47339.9	35685.3	51400.6	35591.7	38924.9	52456	55218.6	50804.8	43395.4	41381.2	47249.2	54175.3	55049.2	47242.4	45669.5	40130.4	39112.8	38756.6	38969.2	41462	45571	39763.5	34328.8	42427.3	49454.2	44820.3	51905.3	45690.7	48018.8	53252	36479.3	35902.7	44956.5	40252.2	44877.5	50165.3	43916.4	40047.1
7.72_1529.1413n	145878	129790	96913.2	112084	178581	157958	110031	133618	69791	187449	203438	147623	169284	113060	145987	143223	187452	116719	165135	130461	189778	194281	208815	119916	143164	90781.2	138364	206551	151759	201210	117715	241834	57314.7	202723	104246	128184	106379	305155	152904	129759	132350	154253	202060	201309	120365	59017.3	199601	133559	174531
7.73_765.6028n	2.93784e+06	3.31651e+06	3.6936e+06	3.93249e+06	1.70625e+06	5.25038e+06	3.22357e+06	3.9524e+06	2.98038e+06	3.43278e+06	3.65198e+06	3.01956e+06	2.59149e+06	3.78564e+06	3.60661e+06	2.84403e+06	3.38355e+06	2.83515e+06	3.18479e+06	2.12519e+06	3.57518e+06	3.5952e+06	3.09787e+06	3.56298e+06	2.48286e+06	2.36153e+06	2.91518e+06	3.34691e+06	4.22423e+06	4.69443e+06	3.52465e+06	5.14899e+06	2.68727e+06	3.44233e+06	2.61859e+06	4.85618e+06	4.09711e+06	2.13235e+06	2.70361e+06	2.77185e+06	2.527e+06	3.15099e+06	3.81564e+06	3.02348e+06	2.92951e+06	2.84472e+06	3.91442e+06	4.86976e+06	3.69146e+06
7.74_651.5351m/z	169975	141091	205342	211768	266596	26412.5	166239	221523	57893.2	184659	92898	102585	63777.1	73009.7	59430.2	170864	199995	152552	202535	124162	118358	90625.7	77229.5	84128.2	216705	130160	117527	72266.9	196824	189323	196482	337265	97579	149912	140375	71245.5	49884.8	285249	182372	130912	100749	290571	207370	120022	116498	85767.5	177192	95606.9	100588
7.75_1004.6335m/z	5.36049e+06	5.1812e+06	4.79861e+06	3.40878e+06	4.30017e+06	3.45245e+06	4.94751e+06	4.84655e+06	4.4769e+06	4.43526e+06	3.91976e+06	4.15683e+06	4.45131e+06	5.45967e+06	4.75111e+06	4.49417e+06	5.16607e+06	4.52394e+06	4.48184e+06	4.05455e+06	4.6052e+06	5.03781e+06	4.63973e+06	4.4804e+06	4.48696e+06	3.4224e+06	4.0156e+06	4.10505e+06	4.17084e+06	4.57055e+06	5.00969e+06	5.08961e+06	4.83998e+06	4.43743e+06	4.5874e+06	4.72924e+06	4.40692e+06	3.99577e+06	5.11908e+06	4.32216e+06	3.81498e+06	4.76452e+06	5.55129e+06	4.54536e+06	4.93836e+06	4.75962e+06	4.94829e+06	4.55951e+06	4.76438e+06
7.75_1226.8928m/z	132811	73064.4	112764	58319.9	79816.2	54241.1	144288	65651.3	28362	46569.5	144328	33426.7	151714	262947	137215	56566.2	100946	53954.6	34904.7	79496.2	62227	43635.4	68051	58880.7	92187.4	78368	49084.9	80903.2	126166	69968.4	105922	101755	41412.5	128112	184870	113322	63874.1	87015	114527	62502	76500.3	133577	206534	90815	78280.9	70914.2	49026.8	34733.9	63049.3
7.75_1620.5831m/z	207160	164268	211090	152077	62777.8	59955.6	205450	141939	90935.4	198936	146812	80521.9	204645	192584	151695	133385	128951	107491	89310.4	53105.5	193295	120789	188232	43688	236987	23936.8	36971.5	139245	150525	505624	102932	220189	26214.2	138245	234912	227093	18619	246577	207579	184559	30546.6	269384	207451	130705	84544.3	53017.4	258633	48765.9	116853
7.75_1642.1681m/z	2.99365e+06	3.11818e+06	3.92782e+06	2.28346e+06	1.97482e+06	1.28103e+06	2.7395e+06	2.42267e+06	1.78255e+06	2.51185e+06	2.08467e+06	1.69494e+06	2.45483e+06	3.48517e+06	2.8146e+06	2.13258e+06	2.80448e+06	2.2152e+06	2.1294e+06	1.6202e+06	2.62328e+06	2.87931e+06	2.56109e+06	1.94204e+06	2.60491e+06	1.2437e+06	1.55972e+06	1.99649e+06	2.13743e+06	2.93823e+06	2.69735e+06	3.34187e+06	1.91291e+06	2.3818e+06	3.14306e+06	2.63445e+06	1.65395e+06	2.27882e+06	2.87851e+06	2.35202e+06	1.34077e+06	3.29393e+06	3.70555e+06	2.16163e+06	2.32529e+06	2.10884e+06	3.34253e+06	1.88506e+06	2.40843e+06
7.75_1642.6693m/z	109107	72102.3	195731	104110	42094	21468.6	65788.3	42994.2	45658.9	63757.1	48424.3	58594.2	95540.2	203506	143217	50113.7	87873.6	47392.5	33507.6	31619.5	55354.8	74141.7	85088.9	46543.8	93286.6	27270.6	23487.4	13514.4	63982.7	103135	93145.7	122253	26917.3	69639.7	89402.9	61232.7	32300.1	91488.2	96254.7	50426.8	19132.9	210450	207795	66191.3	54943.5	54117.9	172838	45662.6	100721
7.75_424.7783m/z	167942	169033	173249	129329	142134	98542.5	144979	125725	119100	126409	126025	137898	142018	175925	160146	136667	160683	146435	145603	123372	159624	167181	160453	146904	151676	104144	125709	135044	135577	179950	141776	167687	136116	130861	158724	149444	116046	134912	165751	138245	109971	165264	191689	141142	151250	140628	175642	135875	149238
7.75_791.5513n	1.81484e+06	1.84301e+06	2.4655e+06	2.79003e+06	2.96238e+06	988366	1.89661e+06	2.23162e+06	1.0195e+06	2.15537e+06	1.72098e+06	1.64134e+06	1.24628e+06	1.10752e+06	964905	1.7595e+06	1.9299e+06	1.67304e+06	2.08681e+06	1.56369e+06	1.80535e+06	1.26281e+06	1.2615e+06	1.16505e+06	2.27308e+06	1.4887e+06	1.60902e+06	1.2734e+06	2.31025e+06	2.12228e+06	2.21247e+06	3.71439e+06	1.4016e+06	2.00587e+06	1.75939e+06	1.27998e+06	1.10507e+06	3.42345e+06	2.03206e+06	1.83066e+06	1.36258e+06	2.94082e+06	1.92117e+06	1.13119e+06	1.20036e+06	1.29555e+06	2.00055e+06	1.38817e+06	1.39214e+06
7.76_810.7439m/z	762977	835819	1.00315e+06	790470	528595	590130	692398	571696	587702	698820	744133	587465	634025	690020	552440	646689	590203	593446	511825	599872	833194	662677	859380	605846	607130	445728	604058	614901	758512	1.0248e+06	766421	893802	590485	685026	745974	702488	511283	700451	604362	666021	522621	890947	794120	664960	724481	538174	770189	618365	664120
7.76_811.8536m/z	328968	311942	483763	335782	251365	194183	347608	307444	234066	294042	331916	204912	360933	394069	316857	259266	266619	279226	264371	206207	324175	275732	383538	239225	335823	231341	278132	240680	272522	429536	320826	358308	254454	291981	420013	340075	223035	375503	267183	316828	200541	522050	434816	294258	308760	226609	415777	233860	285108
7.76_829.5774m/z	269928	328794	441433	326129	229157	179200	328023	334558	298912	284401	270998	167698	314988	320085	291626	294612	287369	273862	217697	163270	386052	291445	258165	175009	176214	109989	163320	294628	228708	267408	290486	362854	299740	276135	361435	255694	204867	316307	294307	301176	200437	327559	301563	209557	286246	284711	381966	159880	250756
7.79_344.2277m/z	4540.61	3814.07	1059.86	718.883	3831.28	2565.13	5778.37	4448.22	7287.68	6667.16	1218.41	8772.45	7923.46	4050.17	4813.69	3468.4	7669.96	7144.72	2142.98	4074.24	3915.37	891.076	3456.94	1938.71	895.653	2038.41	3211.56	1425.72	2309.31	2951.47	3686.01	2799.04	4574.79	4238.65	2180.94	2045.43	6313.62	7594.6	5969.36	3259.58	4502.66	1705.5	3307.37	5408.85	6602.45	5034.2	3602.82	5503.73	4313.6
7.80_1022.6790m/z	89305	106200	77073.2	87005.1	101686	116988	166498	123767	144205	104376	113930	89905.9	127545	115057	78480.2	84279.1	152697	104392	110080	95924.6	122593	100998	76930.2	111412	88265.2	90369.2	114940	100719	121189	95538.5	81976.8	92333.5	111990	92114.2	102707	122618	92967.4	83057.9	131648	113198	159837	124797	123533	98881.4	146446	119813	78043.6	133386	114586
7.80_808.6456n	9.8205e+06	7.65642e+06	1.03352e+07	1.09644e+07	4.71368e+06	1.28461e+07	9.03868e+06	9.52685e+06	6.26244e+06	8.67557e+06	9.35262e+06	7.72138e+06	5.47135e+06	7.95101e+06	9.63481e+06	8.30783e+06	7.78577e+06	5.10872e+06	7.032e+06	6.84717e+06	8.94501e+06	1.28837e+07	9.76787e+06	7.11995e+06	6.98188e+06	5.66724e+06	6.64672e+06	8.02493e+06	1.16181e+07	1.19097e+07	8.9573e+06	1.28179e+07	7.89755e+06	9.65759e+06	8.02747e+06	1.25546e+07	9.76861e+06	6.21049e+06	6.62866e+06	7.12837e+06	5.0138e+06	9.19669e+06	1.05948e+07	1.17293e+07	8.56941e+06	6.00888e+06	7.49044e+06	9.18006e+06	8.10332e+06
7.81_797.7119m/z	45403	22585.1	18829	22947.4	19966.5	24391.9	21947.2	20971.2	22290.7	24087.5	39700.3	19976.7	27942.2	25243.2	25759.2	20257.6	15566.8	17373.2	21380.5	32324.5	20758.3	16590.1	36362.4	42534.8	29430.3	19951	41510.3	57961.5	35027.4	32129.1	18450.1	25805	35894.7	37198.7	31461.2	27775.8	21005.2	44605.7	30190.8	37349.1	40523.1	26568	17153.6	28516.5	24406.1	18592.6	42457.1	26971.9	39320.9
7.84_733.6229m/z	997792	764193	684235	731961	642849	594222	440148	1.02685e+06	661072	758273	883578	802433	598000	799182	799244	505428	1.28825e+06	396261	849246	518910	649802	562357	1.17262e+06	806322	428889	718402	493159	513222	882014	952188	767247	791310	577238	686350	527455	1.30088e+06	1.41857e+06	663886	654436	533022	569539	929815	643792	685648	754146	917813	2.1744e+06	2.67615e+06	669774
7.84_798.0932m/z	210229	219105	287022	200875	168928	243700	182144	192424	237283	258355	227357	273924	262214	202203	157590	235556	198329	238814	283471	193985	175834	214515	197143	271837	242731	236337	185715	260626	243145	213426	78493.9	207680	237101	199533	229323	229029	263911	175012	256544	206248	301162	122597	248727	199567	235438	270321	275312	227866	254583
7.84_806.0772m/z	271908	370468	340704	343510	399553	386002	377643	463511	417654	435186	389982	446676	323649	320903	378316	451032	463056	414862	297390	505317	267863	448788	392622	347234	430947	391972	477893	412569	383079	284748	418203	345957	273080	310352	313113	325389	432420	373759	465354	461104	331107	460573	389429	389719	438072	454475	262479	351018	444035
7.88_1194.8579m/z	91352.1	118699	111713	98938.4	165188	74556.5	114900	113828	137721	98336.1	145614	131700	156207	142790	168098	164510	116935	135997	145290	129130	114273	150614	143965	173985	126493	110028	148485	155362	138474	115338	80523.6	122570	153201	142504	140068	100461	130705	101683	143077	156318	145171	110205	147435	150824	139021	124831	143747	144029	100047
7.88_663.5293m/z	232508	75319.9	119714	155275	111850	110760	156145	163595	133733	96061.5	77138.4	93815.4	59886	165841	144523	83157.5	270255	90376.2	208639	116266	123854	29029.2	207592	125708	345949	195102	156744	178991	215021	99291.1	189298	98029.3	177280	78461.5	115938	178470	107307	96113.3	159563	111472	130209	119377	127739	203983	277760	158131	94788.4	100031	87104.7
7.88_665.6036m/z	176072	104517	66113	82855.1	93694.1	122567	103611	101792	140813	147427	83893	145687	106597	166158	128948	122076	127455	97001.1	124930	93359.4	116290	103713	112771	149046	160714	141729	98979.3	172938	120632	89446.5	154872	112265	146058	78885.6	194932	142331	157879	97553.1	102376	110011	156628	110010	110422	125065	251746	163103	95121.5	105156	124545
7.88_773.5399m/z	733555	593283	466728	520016	707146	589900	745273	541871	758016	509092	585610	854870	671676	807467	845509	700864	765271	700701	829542	730362	642061	743192	590657	700991	732561	690257	861988	750121	564353	513073	621313	565419	737469	623359	589877	592784	732085	660713	725656	601836	723897	658408	551068	689838	823908	785698	611320	750138	654315
7.90_653.5492m/z	133400	118341	102945	113153	140740	84435.9	108774	98676.6	98919.7	116554	91895.6	115517	98727.8	96436.1	99819.2	116947	115143	102781	101555	107206	82658.2	100129	77297.9	102829	129240	103684	104297	98146.5	133740	91582	119567	138000	107562	116671	133774	95477.5	95018.3	144149	117918	108595	99059.8	136476	116871	91598	109479	104237	103950	101536	94602.5
7.90_682.5938m/z	136819	83146.1	71197.6	60869.5	90045	67888.4	71844.3	87302.9	101501	67219.6	61094.2	98476.3	70197.8	105193	101305	85570.4	84485.2	76381.1	93912.8	92907.7	81073.7	104989	100311	93291.9	80936.5	89372.3	99015.3	93662.4	82814	74858.6	117272	80326.9	97782.2	71313.9	100378	70274.7	105261	64591.7	89774.2	78140.1	93291.5	79681.2	67722	96202.4	96986.3	112473	75169.5	109603	79496.7
7.91_1253.8150m/z	137965	152954	77083.7	137222	65149.3	37576.7	67697.2	34772.8	31047.2	46657.9	128380	70213.8	80420	138683	97344.4	46178.1	107208	43049.5	33890.4	55630	135692	155156	239944	265548	259808	226807	373432	108682	112911	152525	81579.7	93956.1	142664	79592.8	75572.6	66930.6	145044	60459	134457	100151	86049.6	101714	77294.1	78066.2	66313.7	65571.6	79092	63486.8	40584.4
7.93_1074.0666m/z	367089	154843	63303.3	284747	226251	222837	160327	136760	182886	127236	27425.1	169753	119307	40373.8	116392	126143	184201	152869	24738.1	48694.7	15527.4	29256.5	89444.9	98092.8	279638	444999	521957	351773	87978.5	39962.9	244394	155777	427340	80108	29459.4	117716	111510	7638.88	76511.9	69659.2	240186	84925.5	38426.4	151624	54154.5	167045	29079.5	14666	46921.7
7.93_537.6483m/z	21111.9	18624.9	10625.4	10949.8	16519.1	5061.71	7431.69	9806.97	7925.13	14964.1	3663.14	47120.4	21528.1	25058.6	18469.6	14324.7	15040.3	4309.45	2863.11	2779.9	3528.72	3187.68	3103.86	2028.82	3974.64	8517.68	2777.02	3358.74	2625.41	6091.85	24406.3	11628.7	14562.5	4555.04	7038.87	8580.46	23169.1	6621.51	47776.3	5475.62	58993	2430.82	20440	14437.1	10741.6	16781.1	2572.47	4124.46	3295.36
7.94_1598.2027m/z	80334.4	195937	262815	446454	197278	99017	241237	98726.2	34849.5	307974	317379	119520	108058	76623.6	85487.3	154195	71227.6	77542.6	60120.6	117394	136718	87351.8	130933	67329	242257	148327	78854.3	133210	102513	191473	30696.8	166623	11560.6	442215	573142	88330.3	62549.6	331756	123877	479230	31375	316840	120059	279871	38836.3	22292.8	184662	28823.2	39390.7
7.94_1623.2107n	1.14991e+06	2.80148e+06	3.12075e+06	7.60738e+06	2.27387e+06	1.48555e+06	2.96368e+06	857805	584266	2.49125e+06	5.57453e+06	1.78617e+06	4.14778e+06	2.90263e+06	2.04572e+06	2.57865e+06	854021	1.09393e+06	1.78668e+06	2.95263e+06	2.18752e+06	1.94188e+06	3.11197e+06	876564	3.5567e+06	1.84657e+06	1.57931e+06	2.54597e+06	867510	2.77283e+06	760004	1.79145e+06	144738	6.82878e+06	8.93147e+06	1.14822e+06	1.53696e+06	6.39782e+06	1.52416e+06	7.9736e+06	406695	4.51714e+06	1.8666e+06	4.40276e+06	210658	202542	4.90625e+06	865870	362959
7.94_757.5202m/z	82218.8	83473	96183.2	63687.1	61067	94756	82707.1	86882.2	97689.7	70696.7	85450.3	95259.1	111423	106112	83271.7	82008.8	79200.4	106234	71626.9	58428.3	93285.8	61024.7	78371.7	85747.7	71244.9	64803.1	68289.1	77707.4	73481.3	95924.2	91941	88872	79538	73018.2	73002.7	102149	78562	84422.7	78987.8	90799.4	76917.4	74292.9	98255.9	98957.6	75969.9	74623	67576.1	91307.3	85755
7.95_812.8943m/z	191524	427176	330559	983362	325276	211563	413958	154230	148441	375608	824816	310290	489857	340874	243135	289048	172124	224032	218314	370695	232775	263001	291932	193689	474896	329156	287023	327990	209024	289375	194112	265689	159023	1.0403e+06	1.5331e+06	161636	222503	966344	272935	1.30766e+06	128693	571119	218436	563562	124735	93573.3	544200	197549	158262
7.95_832.5892m/z	353148	274853	437633	259144	222281	313347	354510	265217	169805	275695	267507	225295	293307	297866	317829	226747	185983	334914	157249	241980	341719	258381	300941	230318	252425	275772	204855	256100	225837	313415	285306	338235	165599	339287	284529	369526	203260	296352	282466	363709	176200	336037	323335	300324	208921	236875	339107	235942	236782
7.95_835.1005m/z	47390.4	47142.1	52795.5	76377.2	50184.2	56483.4	38142.6	14892	25784.9	13717.1	34384	29550.2	14557.7	37507	52837.6	45912.3	69220.7	26220.4	41999.4	96710	75435.6	56900.3	41791.5	46621.1	12869.5	31630.3	15527.6	19980.4	7276.17	36849.3	26081.1	18656.3	13072.4	137696	125419	37900.8	24877.4	50773.6	8116.16	101086	4442.16	18872.5	52027.9	129696	17648.8	13996.4	112122	31383.6	29097.9
7.96_684.4958m/z	39087.5	37640.4	27004.9	40497.1	43419	33340.1	35332.9	33610.9	42760.7	32914.9	32735.2	30363	36710.6	36106	32375.5	33801.1	39045.2	39872.7	40204.6	35009.7	36920.6	35065	37003	37416.8	40547.8	34685.1	29668	28812.9	32786	35214.9	36298.1	50547.4	29600.8	30214.4	28956	40351.7	33248.5	50379.3	46430.2	33562	31575	46702.9	32400	31652.1	33942.2	25557.5	38201.4	39525.2	32452.3
7.99_947.7070m/z	144965	135533	142723	105596	94028.1	150822	128453	148522	139790	115505	147036	115252	123762	126748	144114	138561	134412	144842	119888	132964	186611	149150	149014	193209	108967	129614	121175	155232	135165	171790	161340	139587	112361	86113.9	112306	146339	135125	141153	118489	129048	126928	152148	157204	117149	145903	156123	134192	155797	120849
8.03_666.5248n	803229	821894	646664	809025	801734	609355	713353	660373	768010	686601	676211	715926	738960	727958	677201	787383	814104	753139	859888	736099	689834	702532	657435	701691	902696	758556	746925	676237	735661	711709	849318	1.10051e+06	696474	701333	788876	760583	666667	971215	1.09857e+06	690233	712350	1.0275e+06	746297	685449	709317	670069	803649	841050	707252
8.05_629.5500m/z	147624	154298	138312	251840	237039	98222.3	164328	117655	97538.8	202009	162917	143946	118401	116693	106467	173834	125057	151869	158888	175452	145406	128257	135261	106093	197094	163368	165282	156931	157808	134266	127407	218219	81735.6	196436	224159	98940.8	106019	261165	158393	186261	119490	236670	162466	132379	116519	112815	175928	112779	122938
8.06_701.6200m/z	24033	30926.5	22550.7	28916.9	24600.6	24995.2	25008.1	24024.5	28860.4	33619.5	28554.2	26647.2	31412.4	26272.3	22272.4	32359.4	29457.9	24680.2	21219.8	27029.3	24489.6	30068.7	15212.3	23433	26257.1	30622.1	28339.7	28304.5	21513.7	24220.8	26455	25126.3	26667.8	34105.2	33088.7	20682.5	30726.4	27502.7	30703.5	29005.8	28449.9	30556.5	26449.2	23107.3	24332.7	24017	28823.9	25442.2	19784
8.07_481.4405m/z	51536.7	50796.8	39064.4	35069.2	40275.1	31624.7	39704.6	35808.5	53492.1	37444.3	37857.2	44952.8	43354.7	41554	42083.2	44272.1	46469.8	38459.4	46947.8	45140.5	36501.3	47313	30607.3	37912.4	49984.7	50711.8	50068.4	54844.6	45293.2	33867.3	44623.5	47215.7	48460	36340.7	42343.5	38990.8	50062.2	41008.7	48677.1	40125.6	48381.4	36693.5	37925.8	39462.3	49265.1	47351.2	36355.3	44778.1	43011.5
8.08_1503.1025n	251023	334497	1.26141e+06	411548	9309.76	756255	339517	897390	586278	245742	964452	386839	403259	488427	498594	421642	505744	1.29199e+06	180397	507720	2.5293e+06	495527	1.02149e+06	715562	347966	238331	429938	1.05928e+06	400507	1.89264e+06	646015	291876	308874	44308	270889	720542	404754	1.12088e+06	226121	562473	477462	698611	1.17209e+06	456736	595488	850058	617021	1.25529e+06	552954
8.08_484.2825m/z	39281.4	42486.7	57150.9	36715.2	30564.2	49553.5	40907.5	50104.9	43793.7	31965.3	47240.4	42445.8	37883.7	42009.5	41737.9	43731.1	43244.1	52834.3	32301.9	43842.9	73418.7	45970	56008.5	49865.2	38323.1	39801	36615	49532.7	37276.4	65039	46197.3	38528.5	40221.6	30336.2	37209	45809	42581.7	49872.1	35591.9	38083.3	44827	46621.5	51983.2	39949.8	43502.6	53407.1	42859.1	55198.4	41890.9
8.08_813.5265n	231875	277583	435065	249213	182932	322292	256335	365120	341608	234515	279653	215710	226206	234246	275070	268410	293427	353056	236415	263423	444378	256796	407423	338177	284078	238513	261898	288959	254433	390612	298923	243843	247283	193350	266592	388777	232703	404292	227042	256582	209060	270737	342249	233794	246578	372585	285786	371278	281840
8.11_682.5803m/z	78010.7	71018.4	61559.5	57854.2	71704.4	76965.8	73830.5	67397	71205	60619.7	60215	82443.2	77091	69453.9	70754.5	78377.9	76759.1	74477.3	70318.8	74154.2	53635.6	69292.1	69033.4	67519.7	67884.9	64482.1	70141.3	71169.4	64286.3	65345.6	78776.8	75753.3	78156	64452	73619.2	69644.4	77778.1	65510.8	79052.7	69870.6	71805.5	74163.4	65997.1	70586.6	76081.6	79237.2	65142.5	71086.8	68922.3
8.12_399.7977m/z	11538.3	8136.47	3979.73	4312.47	2585.3	6879.64	10797	7771.89	4299.83	17549.9	10694.1	10581.7	8386.45	10766	11834.4	10717	12633.6	7164.31	12740.4	14111.7	7593.64	7722.09	14419.5	14668.1	3927.69	9070.88	6131.48	19851.8	13689	26668.2	4743.84	13384.6	4630.97	11277.7	5224.67	14575.6	11846.6	12481.6	13712.2	18824.6	6096.11	7276.81	11215.5	10746.3	6729.69	12119.4	15523.7	11617.9	12153.7
8.12_598.5521m/z	48337.3	39643.1	34748.8	32435.1	27243.1	40762.2	46053.3	45482.8	43678.1	41197.4	35889.9	46652.7	44170.2	43367.7	42717.1	29560.3	50310.3	40380.4	51727.4	42089.5	37394.3	34576.6	43621.6	38814.5	38675.4	42286.6	34761.7	57865.8	42736.3	48905.4	51169.2	40112.3	45128.2	28855.6	28845	32459.9	53697.8	36774.4	54478.2	40735.9	52158.3	40285.8	51695.9	35122.3	36336.1	42470.8	56738.7	51947.1	44519.4
8.12_762.6746m/z	155154	180328	393837	380367	218046	301238	223798	257096	169806	283166	368842	270864	222635	219971	196281	338492	240562	246014	201681	261190	231331	313590	348526	154487	194108	182338	282920	296742	235869	375655	240879	321339	198857	333840	386062	259211	214400	317549	237642	290751	301777	450333	280939	340157	273807	201026	357818	288923	235191
8.13_759.7277m/z	357918	535780	573661	671027	272999	601770	456293	495370	470780	502182	616098	410035	423267	417257	427647	696136	492506	466760	587051	418475	518124	381220	557511	380216	389706	486173	429193	653899	544737	897582	661289	572459	338112	575567	475779	585120	486169	508719	502490	808917	422561	556909	559627	424878	455316	553894	943223	578052	434641
8.15_759.9040m/z	32995.4	74360.2	49360.1	46628.6	39363.1	77471.6	46042.8	56740.3	48929.8	84007.9	61188.8	46495.8	76845.5	69070	74851.7	64991.2	85990.4	68332	90972	68087.2	58673.2	65562.3	117128	58947.9	86552.8	57513.6	97063.7	65279.4	43295.2	80243.7	57049.1	51466.3	56102.1	63651.3	51987.3	63577.3	50341	33545.7	89762.6	92299.8	67699.9	62667.9	81534	86233.8	57116	51827.8	95161.5	100007	71029
8.16_1004.6925n	1.95664e+06	1.77425e+06	1.96046e+06	1.65942e+06	1.50844e+06	2.28707e+06	1.71469e+06	1.94621e+06	1.60518e+06	1.93984e+06	1.75558e+06	1.68908e+06	1.65331e+06	1.8286e+06	2.07665e+06	1.61675e+06	1.91987e+06	1.76054e+06	1.89771e+06	1.61329e+06	1.72324e+06	2.03793e+06	1.83247e+06	1.75224e+06	1.60924e+06	1.48599e+06	1.69209e+06	1.52085e+06	1.80904e+06	2.02689e+06	1.98417e+06	2.47028e+06	1.64266e+06	1.85254e+06	1.60155e+06	2.36436e+06	1.84114e+06	1.34996e+06	1.65282e+06	1.56672e+06	1.71262e+06	1.76417e+06	1.88461e+06	1.7753e+06	1.80067e+06	1.81003e+06	1.98817e+06	2.08907e+06	2.06313e+06
8.16_1644.3009m/z	220562	181357	401623	166755	146838	666218	188031	298985	180781	265224	156197	105472	149367	220901	478064	204582	281540	228303	299364	161508	97093.1	386528	320672	252224	152640	161390	136286	179565	314519	494611	281133	727472	129533	185681	161003	695274	136902	162720	116546	183037	238906	182617	377465	86413.2	319096	235011	247423	373081	537111
8.16_425.3124m/z	120488	106605	119086	113373	95913.1	154607	111242	112783	112020	128057	115047	111016	113906	127413	135751	104526	122637	111910	129896	101951	104951	135094	123792	114835	110339	101456	101466	95781.6	124444	139249	121830	150406	109384	112485	90446.2	152364	112259	84004.7	101199	101074	110640	112121	124636	111501	126263	117870	136350	144777	140489
8.17_810.6546n	5.2995e+06	5.39731e+06	6.22016e+06	5.0763e+06	4.23231e+06	7.79503e+06	5.68769e+06	6.08741e+06	5.39585e+06	6.44021e+06	5.72301e+06	5.32817e+06	4.6532e+06	6.39633e+06	7.11048e+06	4.58728e+06	6.15576e+06	5.08172e+06	6.00925e+06	4.21719e+06	5.08213e+06	6.43808e+06	5.73968e+06	5.26908e+06	5.03276e+06	4.56077e+06	4.74907e+06	4.73803e+06	6.33837e+06	7.08953e+06	6.04581e+06	7.39278e+06	5.30326e+06	5.75573e+06	3.87466e+06	8.4894e+06	5.63662e+06	4.21667e+06	5.1329e+06	4.6465e+06	5.55599e+06	6.08762e+06	6.15034e+06	4.97716e+06	5.43413e+06	5.58102e+06	6.23992e+06	6.8488e+06	6.09028e+06
8.18_412.3043m/z	120303	127723	133899	113687	102768	136596	121753	130105	121364	123043	114442	119067	102370	119788	130160	142133	136526	127650	130386	117482	122812	120592	132080	138328	115918	127275	121597	128152	132339	133942	123896	143188	133018	125697	96235.8	127444	122785	117313	122516	144047	127979	113847	141284	125716	121371	131669	142838	140020	138577
8.18_665.5137m/z	175228	174750	105413	123055	146920	71264.1	114404	114397	121731	133005	110509	114001	99111.8	117428	96609.8	108897	134455	113824	123488	126109	89478.4	119429	94650.2	94016	147015	85672.3	106740	98390.1	105606	87665.2	128563	120750	150214	125554	231466	123583	100060	195338	159397	84632.9	106012	196579	105202	126697	126624	131269	116481	143530	87473.5
8.18_833.7409m/z	94379	82800	92461.4	53010.6	33906.6	80451.3	83005.4	62713.4	56469.7	56361.8	59516.6	31932.4	43556.5	46143.5	82566.3	57691.1	66941.2	51631	78141.7	91784.5	99888.1	107350	85826	36642.2	42755.3	27361.4	38384.1	49953	61457.6	138442	103199	93242.6	62096.3	69155.9	67472.5	91123.2	61956.6	30365.6	46073.8	60097.4	49737.5	92758.2	69461.1	40245.4	62009.3	67242.4	108093	127106	134179
8.18_978.6772n	1.13234e+06	1.22232e+06	1.36052e+06	1.03923e+06	851433	1.34726e+06	1.06764e+06	1.24066e+06	1.02816e+06	1.16854e+06	1.08081e+06	1.01003e+06	983505	996576	1.2405e+06	1.34021e+06	1.36512e+06	1.15591e+06	1.1108e+06	947335	1.25295e+06	1.15398e+06	1.24725e+06	1.3088e+06	1.03249e+06	1.06199e+06	1.14463e+06	1.26575e+06	1.24927e+06	1.46658e+06	1.22699e+06	1.49134e+06	1.13966e+06	1.22172e+06	903670	1.31883e+06	1.15404e+06	1.01166e+06	1.19251e+06	1.5055e+06	1.2655e+06	1.12e+06	1.34457e+06	1.24282e+06	1.08024e+06	1.23473e+06	1.31829e+06	1.25252e+06	1.28723e+06
8.19_784.7339n	1.68413e+06	2.05256e+06	2.40461e+06	2.33325e+06	1.43671e+06	2.61202e+06	1.78606e+06	2.09481e+06	1.35905e+06	2.14718e+06	2.22294e+06	1.47319e+06	1.64485e+06	1.53541e+06	1.97305e+06	2.79999e+06	2.39048e+06	1.93287e+06	2.56452e+06	1.73454e+06	2.17153e+06	1.98151e+06	2.52626e+06	2.25717e+06	2.11841e+06	1.75046e+06	1.93563e+06	2.44935e+06	1.96721e+06	3.1581e+06	1.99097e+06	2.78601e+06	1.7566e+06	2.59526e+06	2.36908e+06	2.31642e+06	1.9287e+06	1.71197e+06	2.00552e+06	4.34723e+06	2.15239e+06	2.67274e+06	2.54598e+06	2.42145e+06	2.05781e+06	2.43794e+06	3.00924e+06	2.01734e+06	2.31286e+06
8.19_807.6357m/z	4.24463e+06	4.99023e+06	5.9163e+06	5.16052e+06	3.09996e+06	5.49496e+06	4.08002e+06	5.15643e+06	3.99299e+06	5.10897e+06	4.83302e+06	4.10996e+06	3.96768e+06	3.96126e+06	5.06286e+06	5.33899e+06	5.64369e+06	4.97169e+06	4.53009e+06	3.56442e+06	4.7589e+06	4.32819e+06	4.89776e+06	5.41779e+06	3.68408e+06	4.09562e+06	4.48929e+06	5.26064e+06	5.50687e+06	6.30709e+06	4.71005e+06	6.34644e+06	4.32869e+06	5.06236e+06	3.90268e+06	5.42664e+06	4.01429e+06	4.88563e+06	5.15332e+06	6.71551e+06	4.928e+06	4.96379e+06	5.58058e+06	4.89906e+06	4.21788e+06	4.8368e+06	5.25512e+06	4.79304e+06	5.13498e+06
8.20_1030.6590m/z	103773	77720.6	82687.2	87292.2	98080.9	124620	127296	132188	109652	145233	143220	107041	126970	129269	113062	110075	101878	108137	110031	99907.3	115534	120428	130250	107552	111816	108924	101332	87991	111358	92880	87306	98510.6	118332	117249	144626	102735	117740	102064	119438	123903	132610	102202	128488	139293	91411.4	101828	105252	102795	85309.6
8.21_666.6399m/z	222611	48366.1	37558.2	133202	52267.1	54047.7	49019.3	61242.1	158409	167693	89970.8	123759	72009	56500.5	52923.7	59904.2	151595	55842	52473.7	42251.3	82991.7	67631.5	62726.8	55508.4	44511.7	61688.4	56338.5	43714.7	48472	57736.2	49575	42362.4	170605	54055.7	501491	146878	111294	97651.9	67713.6	71888.1	67603.2	71331.9	61559.3	193604	135089	181156	52101	85409.3	40948.9
8.23_313.2735m/z	52758.3	74840.5	88269.9	132183	94107.5	40011.7	67907.1	61206.3	43095.4	98298.8	68836.4	70361.6	49634.9	48472.5	42286	60818.5	70392.4	64424.9	70012.1	108526	49063.1	53668.3	51401	42702.4	115639	77762	73026.7	42213.2	67880.6	52505.1	46752.8	66633.7	48217	100686	130996	51396.3	49377.1	155911	106822	85415.4	62080.1	181432	57748.9	55174.5	58862.5	49755.5	86356.9	99447.1	65786.7
8.23_576.4994m/z	1.07536e+06	1.11891e+06	1.0578e+06	1.24973e+06	1.1826e+06	962051	1.06892e+06	1.05617e+06	974464	1.17112e+06	977521	1.20714e+06	1.10771e+06	1.05375e+06	953629	1.17741e+06	1.17829e+06	1.07104e+06	1.3429e+06	1.2738e+06	989068	1.03322e+06	1.00306e+06	1.115e+06	1.22201e+06	1.03842e+06	1.29411e+06	1.00174e+06	1.01352e+06	1.02617e+06	1.00983e+06	996250	1.06146e+06	1.17585e+06	1.35112e+06	1.04575e+06	1.05068e+06	1.40397e+06	1.29129e+06	1.12935e+06	1.24265e+06	1.42695e+06	992361	1.07788e+06	1.05563e+06	1.01379e+06	1.12696e+06	1.25045e+06	1.13546e+06
8.23_592.5080n	1.57262e+06	2.13611e+06	2.4921e+06	3.81588e+06	3.00105e+06	1.0099e+06	1.97581e+06	1.60885e+06	1.13015e+06	2.88839e+06	1.9951e+06	2.04879e+06	1.39832e+06	1.33591e+06	1.15529e+06	1.58718e+06	1.96535e+06	1.63368e+06	2.03032e+06	3.06045e+06	1.42134e+06	1.53494e+06	1.38124e+06	1.10542e+06	3.19212e+06	2.12861e+06	2.08758e+06	1.17586e+06	1.93721e+06	1.39331e+06	1.4228e+06	1.89946e+06	1.45463e+06	3.02184e+06	3.60812e+06	1.53885e+06	1.4047e+06	4.45959e+06	3.16949e+06	2.34822e+06	1.74026e+06	5.26961e+06	1.57741e+06	1.52411e+06	1.5972e+06	1.34216e+06	2.54792e+06	2.74666e+06	1.87327e+06
8.23_809.5296m/z	69464.1	79862.4	74630.3	104879	90797.9	60015.8	79639.6	66197.2	68193	113936	73234.9	78354.5	61280.9	55325.6	54508.8	59158.2	73783.8	74785.9	52398.7	75274.4	72732.8	51390.9	50312	61759.7	74625.2	76593.1	71624	48661.4	69339.9	55215.2	46103.6	57091.1	54661.2	84025.2	97674.6	51609.8	56468.6	125840	72878.2	85332.7	69503.7	89665.6	61317.8	67055.5	58125.2	66791.4	80133.3	62758.4	68950.8
8.24_1281.8449m/z	128265	88744.2	80599	144438	101462	87668	157094	159747	66107.8	73410.3	117179	112491	157068	167631	173563	125218	174975	56692.9	85525	123725	257786	195735	287242	268732	243290	209982	335323	128643	137829	244900	75303.9	126575	165508	159628	110490	112404	168864	49598.3	121504	140908	83928.1	141840	178771	279843	107687	192014	168244	181933	112725
8.24_624.2367m/z	16079.7	13238.4	8451.93	5925.29	20621.8	19208.2	34127.4	15531.6	47617.6	14004.1	10938	17084.5	21975.5	21779.7	25870.1	15469.4	12021.8	25182	15818	14875.9	11635.5	18136.3	22279.2	18791.2	19698.5	13739.3	17593.5	22307.7	21235.4	6909.57	17744.6	12116.6	31051.6	14519.4	18685.1	14918.9	34941.7	26530	19395.3	22282.5	23890.8	12612.3	20308.2	21363.3	15242.2	11588.8	15898.4	20354.9	15974.5
8.25_328.1787m/z	58369.4	55980.6	45794.2	52011.8	63470.5	53702.1	57242.5	55836.6	54641	53057.7	48077.7	58725.3	48049.1	54418.7	52842.4	49312	56934.8	54685.6	47078	52856.1	47851.6	49983.3	46239	51532	47302.1	47800.1	60025.7	57942.3	54588.1	51779.3	62669.4	55469.2	70555.9	51988.5	53871.9	57798.1	63744.8	51236.7	60034.1	47884	54691.5	46455.9	55558.6	47887.8	53827.1	54084.7	50144.1	51948.4	55767.5
8.26_110.0593m/z	11311.6	11641.3	8494.49	7552.94	10009.5	9377.24	10300.6	11744.5	11609	12512.4	8952.56	11232.4	9855.12	12671.1	11696.3	10374.1	9720.51	9844.28	13110.9	11116.1	11177.8	12514	11155.3	12388.1	9448.4	11005.4	10882.9	7157.21	7582.86	6715.16	9530.36	8384.29	11118.2	9189.72	8638.35	9016.84	13526.7	11065.5	10293	9299.66	12202	10147.4	9285.85	10702	13432.9	9135.65	11174.2	10986.3	11810.3
8.28_761.6532m/z	1.0352e+06	1.28811e+06	1.06035e+06	937376	830651	704615	677543	1.22144e+06	913854	1.01673e+06	1.40775e+06	953700	1.00848e+06	1.04548e+06	925420	780741	1.38515e+06	658825	959723	808554	1.08048e+06	715255	1.50063e+06	1.19935e+06	893300	1.47726e+06	889237	926039	1.0969e+06	1.48341e+06	933592	1.05998e+06	781785	1.17202e+06	722688	1.14689e+06	1.65993e+06	892030	976869	1.05359e+06	865137	1.23777e+06	921936	1.05398e+06	943125	1.10892e+06	2.35104e+06	2.65924e+06	786366
8.33_835.6668m/z	90742.9	70489.4	92058	95582.8	73546	86692.3	61967.6	93044.7	62337.6	68499.5	94297.4	68391.5	80824.1	114784	99841.1	66638.6	92132.4	68481.9	67160	54307.1	81290.5	76602	81087.9	79842.2	63863	75675.9	49474.4	54904.5	79115.9	104477	77374.9	96864.8	67087.4	83756.3	68452.2	113664	117246	55886.1	63151.4	59496.3	66147.3	108278	68356.1	106928	82662.3	81563.3	107093	107322	59019.5
8.34_773.7651m/z	21128.9	98879.5	68301.2	95668.6	10720.4	12625.4	69741.8	23297.1	7400.72	20084.5	44240.6	12925.8	38061.2	17627.2	13609	49149.1	56207	18279.9	22932.3	32442.9	96817.7	21030.5	68827.7	65794.1	28167.9	70397.5	68458.6	99708.8	23037.8	50201.6	48317.9	32906.2	22467.2	27400.4	31081	38558.4	36851.3	43794.2	42251.7	44898.5	41959.4	44881.3	47991.5	43191	24711.3	35395.5	68830	70689.1	27526.9
8.37_829.6800m/z	1.08784e+06	833182	1.12541e+06	1.21514e+06	875735	1.09988e+06	1.1015e+06	1.01172e+06	908456	783923	1.40534e+06	874415	1.07653e+06	1.39071e+06	1.23808e+06	984538	1.25479e+06	1.02561e+06	773845	838350	1.34314e+06	1.03006e+06	1.83006e+06	930670	847939	1.04969e+06	1.08169e+06	722516	957440	1.50859e+06	1.04535e+06	1.39658e+06	886458	1.02041e+06	1.23733e+06	1.31645e+06	1.38223e+06	705898	1.00846e+06	1.0714e+06	1.01327e+06	946822	1.0152e+06	1.71921e+06	870071	1.08941e+06	943614	1.14565e+06	1.01587e+06
8.41_338.3780m/z	7181.87	1236.64	1797.47	1245.56	3982.82	761.68	3353.76	1713.23	2635.15	3990.06	4471.76	2355.18	2254.02	2777.8	3952.77	1416.01	1275.42	1013.36	5405.45	1454.1	3391.25	4929	2188.13	3414.99	4071.95	3359.55	6830.46	11166.3	35863.9	4088.32	4667.74	3573.86	1280.42	1561.96	1473.85	1705.63	2047.12	4444.56	2146.92	3280.43	2500.64	7160.99	1952.99	1566.65	1493.31	20167.6	1529.33	1144.98	4692.37
8.43_920.7454m/z	25727.3	20407.2	20815.5	17772.9	24087.8	29584	34711.1	27965.8	24456.9	19703.1	19766.2	20195.3	25620.2	19028	23533.5	18842	21186.7	23744.1	22221.2	28620.6	23501.3	28739.5	29219	24476.5	28822.5	28667.6	26834.7	30709.2	33717.5	30714.3	22934.2	23283	33744.9	25108.9	27068.8	23195.8	24700.1	15544.2	21839.1	20630.9	26890	22771.7	29288	16055.5	22475.1	20656.5	19706.6	23871	21654.5
8.47_530.4708n	2.57376e+07	2.15191e+07	2.0641e+07	1.88114e+07	2.17182e+07	1.83208e+07	2.32307e+07	2.23794e+07	2.4841e+07	1.87168e+07	2.27659e+07	2.44732e+07	2.30942e+07	2.09121e+07	2.23794e+07	2.48267e+07	2.21509e+07	2.67586e+07	3.17902e+07	2.96417e+07	2.67922e+07	2.98916e+07	2.24747e+07	2.45104e+07	2.86044e+07	3.40282e+07	2.88442e+07	3.06023e+07	3.10779e+07	2.63869e+07	2.26616e+07	1.98812e+07	2.23878e+07	2.05566e+07	2.23725e+07	2.24022e+07	2.1486e+07	2.16561e+07	2.77238e+07	21588453	2.07143e+07	2.06722e+07	2.56396e+07	2.40353e+07	2.34341e+07	2.25503e+07	2.89606e+07	3.10528e+07	2.69083e+07
8.51_872.7363m/z	86731.4	72463	75815.8	74518.3	69480.2	113816	77819.4	73641.9	98734.8	82523.2	80318.3	93701.9	87120.2	92220.7	93110.4	100274	81476.8	93040.6	79905	81680.8	89516.6	125841	89056.8	90727	81929.7	72599.5	99043.4	80552.9	82323.1	75543.2	76273.5	115768	80116.5	116420	78180.1	75738.9	85233.8	75161	75226.5	101180	71174.4	57209.7	92663.2	106693	93350.3	88454.5	82518.3	88648.8	91052.8
8.53_1229.0012m/z	65201.7	25026.7	412636	137624	13508.7	151262	88961.2	33615.6	11862.1	32886.3	41245.6	21401.8	2896.9	19771.3	31926.4	28607.9	155265	111984	291830	38394.6	79451	53994.7	92735.8	27280.3	31083.4	16038.6	53367.7	167162	33185.4	289778	32439	261996	18057.9	97319.7	45950.7	83705.8	27075.3	16006	17998.2	34223	21554.2	42538.9	23822.3	30013	83796.3	177688	288225	706615	545473
8.54_1573.3188n	1.0743e+06	1.75115e+06	3.30936e+06	2.91463e+06	766205	2.31155e+06	1.56995e+06	1.7931e+06	1.29605e+06	2.28953e+06	2.2062e+06	855857	1.39476e+06	865489	1.65049e+06	2.27315e+06	2.79709e+06	1.85829e+06	1.29095e+06	890875	3.42282e+06	1.84214e+06	4.09251e+06	2.99975e+06	1.38066e+06	2.30058e+06	2.67462e+06	3.33188e+06	2.61617e+06	6.25512e+06	2.04806e+06	3.87414e+06	1.02945e+06	2.5537e+06	2.08434e+06	2.46292e+06	2.19302e+06	2.27062e+06	1.76797e+06	5.46922e+06	2.81871e+06	1.80647e+06	2.04038e+06	2.81586e+06	1.09412e+06	2.10797e+06	3.12832e+06	2.4787e+06	2.12928e+06
8.54_413.8136m/z	31011.7	38553.2	45448.2	42148.4	33932.2	29766.1	39299.3	43120.6	37638.9	47053.7	45534.6	32276	32721.8	31871.8	35499	46527.6	38172.6	38330.9	30171.9	39856.5	41570	30059.5	43348.5	41459.6	29859.6	43696.4	45258	39917	35824.3	56943.4	37572.2	45122.2	34262.9	46118.9	43926.9	41117.6	53245	50259.7	45186.1	60425.9	47380.5	38686.5	38351.8	47672.2	34953.8	44139.1	35250.9	48609.4	39881.3
8.54_769.6589m/z	421071	447158	506077	454223	393989	458368	437608	427218	458866	500421	466729	412144	425905	399653	434226	507218	520565	471809	496999	416904	522211	471675	521546	489935	411791	498181	537231	510909	530793	598850	446795	520649	409011	456192	474222	487290	487380	525795	489619	638852	543311	466589	454024	529093	424268	463719	543668	547664	471805
8.54_820.1531m/z	119865	78061.8	120698	125235	90835.5	117119	115547	72304.8	110812	103504	106343	61043.9	78952.5	71510.5	98781.4	91657.8	193288	191170	241230	104266	293323	145004	172859	155789	90761	52179.3	76907.2	49635.2	83282.9	259293	97292.6	115842	51364	129767	91240.5	93477	77421.8	113389	78291.9	175876	93265.5	105339	131849	147914	83246.7	203447	204936	382522	248942
8.54_980.6936n	1.79036e+06	2.18801e+06	2.41471e+06	1.98658e+06	1.72152e+06	2.27532e+06	1.98472e+06	2.12696e+06	1.96207e+06	2.21086e+06	2.15397e+06	1.81922e+06	1.89067e+06	1.7164e+06	2.06881e+06	2.36985e+06	2.41632e+06	2.01688e+06	1.78546e+06	1.72937e+06	2.51012e+06	2.02415e+06	2.62424e+06	2.5559e+06	1.88029e+06	2.25679e+06	2.39899e+06	2.60453e+06	2.29475e+06	2.82861e+06	2.17752e+06	2.55505e+06	1.76145e+06	2.2499e+06	2.17063e+06	2.22732e+06	2.2979e+06	2.27184e+06	2.08118e+06	3.16208e+06	2.47313e+06	1.96079e+06	2.07278e+06	2.49709e+06	1.83449e+06	2.24725e+06	2.48854e+06	2.29285e+06	2.1975e+06
8.55_1007.5991m/z	39477.1	76897.1	42758.2	35066.3	40995.7	32477.4	33979.3	37920.2	27274.7	23875.5	17901.4	30578	33880.2	22067.9	22725.1	22490.3	25500.1	14742.1	23339	35723.6	31834.5	31606.7	32523.4	23097.4	33546.9	33386.6	52692.4	38642.7	42350.5	25193.1	44410.1	64008.9	62544	40025	27245.2	31396.9	21441.2	35122.4	29548.2	33340	32680.1	26214	20932.4	19442.2	21879.8	30007.9	25844.7	29016	31031.4
8.55_626.5856m/z	141257	155057	150774	145763	146727	104112	149139	139316	132368	153273	146774	153585	138774	121906	125193	164737	165405	128480	174529	156418	156933	135846	158193	131222	135863	156541	166032	157477	149922	139063	149043	142984	132408	157870	173662	142086	136759	183947	162159	177706	165780	163954	148011	160539	130123	164807	167004	167355	151982
8.55_750.5778m/z	411157	485940	522291	465856	425518	444869	462533	463946	455212	495003	487192	436746	424464	393397	446764	501023	521752	442343	435749	439450	512721	456266	532826	521567	469922	549306	528362	537048	508614	551029	476397	532551	453920	526833	537062	489368	500803	579852	519381	634905	550585	488320	462029	537128	418953	486569	558607	526036	472697
8.55_786.6633n	1.08342e+08	1.29638e+08	1.62406e+08	1.43802e+08	1.03093e+08	1.30512e+08	1.09059e+08	1.16644e+08	1.05467e+08	1.24036e+08	1.27793e+08	9.7738e+07	1.05856e+08	9.33644e+07	1.18741e+08	1.36487e+08	1.43312e+08	1.24253e+08	1.12481e+08	1.02918e+08	1.52881e+08	1.19322e+08	1.59719e+08	1.43916e+08	1.1341e+08	1.36168e+08	1.30909e+08	148931410	1.35985e+08	1.99517e+08	1.33621e+08	1.62698e+08	1.05484e+08	1.33297e+08	1.30468e+08	1.31683e+08	1.22233e+08	1.29353e+08	1.20219e+08	1.94445e+08	1.43631e+08	1.24689e+08	1.23463e+08	1.53439e+08	1.04671e+08	1.29474e+08	1.64547e+08	1.47842e+08	1.31746e+08
8.55_787.8103m/z	176077	194966	215004	220567	125163	182418	140240	192366	140004	194255	232680	139379	178678	164360	179546	196270	302142	227671	161099	184345	241794	159681	262535	243454	253394	172426	230660	319200	320679	381604	239681	233202	87438	204163	200775	151827	149128	226250	225171	310493	240237	224870	179826	266334	205334	237049	191979	288339	177053
8.55_787.9298m/z	158049	216746	228025	245457	165177	214582	236199	202500	213100	216910	259842	164414	157815	156998	265857	263240	250590	188079	184821	166992	344709	250973	335123	358686	280018	213958	200316	136483	164803	248571	231237	240426	181599	226842	278665	225746	207252	295196	241703	449716	253246	222472	215541	261214	147049	212288	270226	229087	216718
8.55_871.6229m/z	111898	118660	145273	112365	109757	122846	107739	141434	169055	155331	106665	103336	172138	119989	144393	129667	116717	141379	107040	111034	134203	170170	120458	138274	113134	129875	160279	146540	133479	134716	108723	143583	110876	167686	117278	104628	117449	116013	123118	176236	157200	122578	120960	200057	135122	133258	112870	120897	118053
8.56_787.7543m/z	946291	1.58411e+06	1.52717e+06	1.19491e+06	846392	924107	1.12274e+06	858692	932877	1.22814e+06	1.38036e+06	1.05091e+06	1.36784e+06	1.09716e+06	1.20008e+06	1.80233e+06	2.28858e+06	1.64796e+06	1.44686e+06	1.85073e+06	2.45299e+06	1.07904e+06	2.34538e+06	1.60743e+06	1.41631e+06	1.88353e+06	2.35373e+06	2.35352e+06	1.14763e+06	1.3852e+06	1.54648e+06	1.38369e+06	1.01689e+06	1.11518e+06	1.1193e+06	1.48297e+06	1.3016e+06	997093	1.6827e+06	2.14423e+06	2.36813e+06	1.72869e+06	1.2068e+06	2.11229e+06	1.58199e+06	1.75856e+06	2.7924e+06	1.99996e+06	2.22879e+06
8.57_1430.1904m/z	27044.8	77633.6	206540	407246	49000.9	32819.2	34358.1	29496.8	11058	164701	151063	70083.1	23476.4	21758	56421.7	98007.2	85457.3	48644	65979.8	27921.4	95436.3	30143.6	78213.8	39221.6	103133	66616	44175	8352.3	132913	136974	32807.5	125384	4833.49	165739	212950	136553	15590.1	228012	101516	332448	95795	241337	36985.5	43534.2	84571.4	33497	256378	69448.7	61850.7
8.57_313.2736m/z	47988.8	60293.2	63307.7	135358	117441	23991.4	51064.3	48747.5	30071.4	70757.6	83993.2	86951.3	41308.9	40029.6	33947.6	45773.7	48806.8	39380.6	69684.7	105758	53604.4	40609.1	50523.2	29809.8	99327.1	103457	57745.7	34512.8	73428.6	52043.4	37943.5	46956.9	45435.1	84838.2	133098	48165.5	38729.4	154311	93086	49568.2	57111.3	175776	41199.7	42703.9	44679.4	38095	89656	84772.2	47456.6
8.57_594.5235n	848190	1.10494e+06	1.00577e+06	2.24875e+06	2.50752e+06	410410	948652	771314	534725	1.34692e+06	1.3417e+06	1.52865e+06	756378	690881	583581	793106	810679	586305	1.16825e+06	1.77762e+06	741287	663555	732905	489635	1.54409e+06	1.46395e+06	834710	514021	1.06313e+06	755033	693228	736879	803267	1.40758e+06	2.45664e+06	837255	641449	2.72417e+06	1.83734e+06	908821	1.02196e+06	3.20663e+06	637437	685581	769003	622974	1.46636e+06	1.36371e+06	786795
8.59_1238.0532m/z	67362.8	107482	87086.2	446178	432751	24638.4	84076.1	28504.3	9775.25	162896	115624	105214	36858.6	53585.7	19787.9	40919.7	59321.4	51660	139484	132608	41610.8	29383	44779.6	19263.7	194886	149815	92097.7	19395.3	142200	57570	23290.7	56963.8	22256.1	167658	306781	29155.4	15871.4	287611	244544	63418.7	86467.5	607460	26597	32460.1	25325.5	29924.3	221488	99678.2	70919.4
8.60_666.6015m/z	54527.5	51308.9	53653.6	81826	87190.8	38821.9	54861.5	39876.4	33225.9	92874.8	61917.3	55403.6	71039.5	37409	37132	48359.6	63074.5	46057.8	88109.1	63603.8	57380.4	51338.5	51792.8	32214.7	58104.4	44234.6	66212.8	30462.1	68930.2	52558.4	43426.7	54800.1	43022.5	67701.3	81352.4	41586.6	36682.6	91452.2	101117	53722.7	70765.8	138122	44544.9	40991.9	49375.6	55276.4	82927	53081.3	47552.3
8.66_637.6238m/z	52784.5	30901.7	40704.3	57849.2	41045.3	37358.7	32064.9	34393.7	48569.8	37818	42622.5	57225	52158.7	52292.4	61209.9	47561.5	52654.8	54930.3	42905.2	42688.5	41155	35662.6	47296.8	47337.9	41801	55403.8	51210.1	75301.7	60120.3	51189.8	36775.8	39115.3	45018.3	39183.4	34705	36522.3	34340.6	39979.2	38358.8	49633	65460.2	58811.9	67125.1	67515.2	48315	57746.9	49570.7	56134.2	28673.4
8.68_611.6023m/z	498887	573267	589576	1.07476e+06	1.1226e+06	365883	530989	487355	387354	695397	711558	723888	441499	434206	430840	481138	473941	435915	623841	814984	470623	424696	504044	389659	761629	779345	488876	358950	593318	471596	451098	493028	459729	731442	1.09379e+06	506494	418036	1.18749e+06	852864	550650	543540	1.40234e+06	425019	464944	451169	416077	764505	748051	485559
8.68_789.6843m/z	3.01532e+06	2.893e+06	2.5532e+06	2.57765e+06	2.70511e+06	2.19956e+06	2.13298e+06	3.077e+06	2.72962e+06	2.54035e+06	3.44225e+06	2.48287e+06	3.14138e+06	2.57126e+06	2.61156e+06	2.24559e+06	3.52049e+06	2.62679e+06	2.388e+06	2.21142e+06	3.05999e+06	2.59116e+06	4.47008e+06	4.09388e+06	2.34154e+06	3.23807e+06	2.94275e+06	2.22076e+06	2.89609e+06	3.53192e+06	2.56308e+06	3.2932e+06	2.49806e+06	2.85411e+06	2.63581e+06	3.18179e+06	4.10081e+06	2.53912e+06	2.17686e+06	3.55722e+06	2.50046e+06	3.14337e+06	2.35396e+06	3.42575e+06	2.60258e+06	3.07597e+06	4.31876e+06	5.78585e+06	2.50964e+06
8.70_841.7141m/z	62388	38125	38336	38877.7	48610.3	61153.3	51076.6	95268	66429.6	67801.8	47410.1	33575.8	74527.1	69172.1	33809.8	30357.3	47765.8	48117.3	60936.9	43175.3	59078.7	50168.4	48276.4	57406.3	32261.7	34206.7	45038.6	20916.1	42727.4	64316	37480.1	57972.7	46550.3	73651.8	46168.3	148395	88880.4	26800.4	36589.5	39159.3	39209.4	59539.9	35139.9	55776.6	64623.2	56829.1	69837.6	76466.9	56817.9
8.74_420.8210m/z	27286.8	16993.4	30101.1	30699.2	9903.93	24017	32378.2	17699	17700.6	17298.2	29050.9	6716.29	17817	17464.6	23645.8	15451.6	27630.7	25425.5	16989.5	13055.4	25419.6	24485.5	45567.6	34124.1	29992.7	23533.8	32386	40012.6	24079.5	56328.8	24367.9	33095.2	11190.5	29441.3	18042.8	23083.7	24239	17331.2	15344.3	23850.8	19708.4	21277.3	26783.6	35282.6	22632.6	25516.4	40686.8	31206.5	14432.6
8.74_959.6551m/z	33627.8	33535.7	33821.4	36628.7	29439.3	38851.5	32776.7	29688.3	29621.2	30405.3	34799.4	33686.5	35864.1	32678.4	29962.5	29304.9	34529.8	31925.6	19135.5	26531.3	33816.9	35107.8	37667	25583.5	36080.1	46631.9	52471.3	51920.8	51911.6	51352.4	35667.8	40463.5	31618.1	36910.5	35039.4	29943.4	33263	26807.9	34241	31818.5	36228.7	29811.9	31882.6	35238.1	36486.9	30113.4	32216.3	34163	30925.8
8.74_962.6862n	179252	169126	172034	149509	146941	154702	172703	170448	176776	176457	178485	164674	179142	167766	170944	147770	159882	169433	144219	170075	162101	194511	200727	163920	152706	180549	184645	184014	180077	198852	179724	178754	142103	156724	142615	185671	197242	170911	181436	182132	155858	149055	158001	179851	144850	153187	181933	185558	167842
8.79_761.6704m/z	49843.6	50483.9	35967.9	42796.9	50035.4	46640.6	45907	52108.3	52619.2	37857.4	44716.9	60593	43047.2	51332.4	48839	54369.3	54125.2	56092.3	52976.7	55444.3	47019.7	52231.4	49785.2	52257	49848.6	56438.6	45594.7	53014.9	46931.5	45292.1	48061.9	40266	53258.4	38934.5	56506.2	48083.5	50359.2	70151.7	53681	42123.6	49927	50404.3	51569.3	51985.1	54372.7	52329.6	43887.7	62015.2	49509.6
8.84_1235.0037m/z	46649	62360	41038.1	45136.5	55653.8	36419.9	44034.6	38888.7	54477.4	50895.8	45994.8	42135.4	60848.8	46046.1	64300.7	69954.7	36558.2	75359.4	61461.9	63665.8	75092.9	39676.6	37450.9	52804.9	55909.5	79963.6	68947.8	85029.6	80222.1	85657.8	67775.9	58572.1	45941.9	61637	45511.6	47143.6	58946.8	45345.1	67572.7	79010	71109.5	42936.9	43659.4	58279	58630.9	54355.9	50456	68907.3	61918.4
8.84_662.5536n	89551.4	97773.7	72047.7	142566	184019	75621.1	91994.1	148581	76732.4	72016.9	163027	190315	58176.6	74329.2	68670.9	78385.3	87214.8	68060.5	75025.1	246661	66430	72206.3	75261.4	68182.3	106138	157968	78892.7	78931.2	77883.5	69636.5	79204.9	69844.1	89969.9	122677	461408	59151.8	69441.6	895559	105827	82953.4	73966.9	168708	64486.2	84076.6	73946.4	76890	75535.9	72854.7	77303
8.84_722.6293m/z	74872.9	94581.1	66496.4	99249	122028	72633.9	92483.8	99880	91193.8	77662.6	102845	128321	71027.4	66749.4	73390.9	78500.1	78380.3	73188.5	79738.1	140149	69876	76747.5	77878.8	81937.3	89333.8	111244	83187.8	74223.9	65351.5	68177.2	84564.6	69076.4	84385.9	96820.7	224634	75523.2	73975.4	365699	96636	78192.8	74742.2	105363	67582	77555.2	80696.1	72496.4	79255.2	75408.1	79134.1
8.88_804.6989m/z	357024	335774	273160	269788	257761	259049	275535	318144	260598	237309	347598	276853	343340	361039	288165	273143	385101	235334	262462	302091	347156	289537	488320	391315	234021	354631	308591	257824	313644	381275	287362	313025	299254	305017	300422	323268	380933	255435	252309	280174	259590	324137	286000	395173	292742	296753	399023	569106	270131
8.89_647.5531m/z	262340	186467	170322	206275	189919	201560	198064	207266	199336	178781	160350	191104	173490	180095	178987	188080	220356	205657	269772	231003	191113	187160	160817	205629	189995	196913	206750	206685	207468	199466	238124	206876	203864	160974	177076	165956	183650	180809	186565	198089	235195	221914	177488	180435	182194	187793	191070	219715	199036
8.90_1012.7793m/z	54508.1	56366	51570.6	44607.7	45381.1	58562.9	45350.1	41082.4	51090.9	42572.3	39135.1	45151.5	43951.2	48733.7	49119.7	37839.2	47147.3	40923.1	50869.9	48839.6	46026.9	47012.2	45167.9	49164.2	34862.9	42741.7	48870.6	46157.9	47186.2	57374.7	55757.6	41929.9	46813.5	39074.1	36593.6	45690.9	43762.9	47082	47922	52149.4	54453.9	47003.3	45332.5	45027.3	49379	38963.5	43486.2	50077.6	48189.9
8.92_1035.6358m/z	23518.3	35048.5	38410.6	31763	32400.4	48027.3	40217.6	35109	22917.9	38626.1	34304.4	33731.6	39685.3	38302	39695.3	32331.9	42911.4	37908.8	38938.7	38324.9	39834	40613.7	48467.1	39849	33027.2	37912.2	38354.3	33455	32276.4	42985.4	35393.1	31421.8	35495.6	33868.7	42969.9	49890	38582.9	42592.4	42853.7	28293.7	34353.4	39421	42485.9	54002.7	36466.6	39337.5	37067.9	34498.5	35184.9
8.93_654.6122m/z	90551.5	86275.5	107354	100484	77069.6	113631	98101.1	85106.6	98297.2	85389.3	103668	86771.2	93795.2	97754.4	97529.2	95411	106812	108986	91432.1	91202.4	104952	93747.7	138703	130602	80111.2	100176	90877.5	103931	94665.1	141953	75350.6	112948	78468.1	94195.4	109206	118141	100928	98287.5	99445.2	144714	95789.9	100330	89340.4	117590	95585.9	107476	117130	118608	92594.8
8.93_967.6428m/z	55305.4	58590	64543.9	64193.8	62684.6	73709	76273.9	66056	69444.7	69222	65163.6	52457.6	75428.3	70456.2	62874.2	59740.9	64463.6	67658.9	55356.5	71276.1	84632	68972.1	79253.7	69734.8	54213.3	72997.7	81165.7	80848	63374.5	51693.8	58740	82197.5	57130.2	78742.8	73635.1	89500.3	73045.9	79571.6	54917.9	69606	80253.4	66029.4	61934.2	82877.7	62093.8	58788	70782.6	70649	77633.7
8.94_815.7899m/z	830949	794660	1.06227e+06	800059	633886	1.0246e+06	919757	791364	873580	940764	1.04696e+06	732695	913662	870452	1.10764e+06	1.00098e+06	1.38879e+06	1.15855e+06	756115	787608	1.28374e+06	1.00068e+06	1.7294e+06	1.34138e+06	653449	1.2234e+06	1.22157e+06	1.14891e+06	811198	1.70953e+06	788482	1.02434e+06	679775	974992	975755	955733	1.17995e+06	1.04573e+06	788743	1.74481e+06	1.04276e+06	980767	819440	1.3045e+06	972300	925495	953327	952156	1.05581e+06
8.97_631.5652m/z	72050.5	67382.1	76135.9	96402.8	100789	85855.3	76312.9	72135.6	71996	109363	87301.1	82701.9	82480.6	74074.8	106634	87928.2	87738.4	83217	118325	87120.5	87101.2	63504.3	83265	61192.7	124452	102078	78181.4	109578	139379	147369	76305.1	91808.9	54083.5	88326.8	75045.7	100063	68189.3	96011.6	101905	75234.1	93172.5	181471	103891	70242	79510.5	74223.8	120571	101116	102646
9.03_956.6809m/z	21216.9	13682.9	9265.68	9188.1	19681.5	9252.76	6170.5	10056.9	16194.4	9118.37	7092.17	14726.9	10539.7	11059.8	14189.5	9149.06	19896	9686.55	5907.77	10287.1	7734.13	10475.4	9235.65	8115.61	7876.4	13755.9	10882	8129.41	7251.2	14250.9	8989.44	18310.6	9741.21	10997.3	9767.01	11251.8	11599.6	11339.8	16262.9	8953.97	7781.37	11562	14274.5	9014.43	9633.82	6484.77	10955.1	10623.6	11158.7
9.06_586.5919m/z	75732.8	107440	94595	109741	122811	85855.5	78825.2	85843.6	89758.1	140239	103636	84199.4	99917.3	64128.7	79620	145298	114220	135275	127118	122328	140016	66087.7	118766	87262.6	155592	174228	127115	196518	143056	169145	101154	89296	65783.4	118520	113715	70597.1	88871.7	163798	127345	123330	115008	145628	114613	81639.4	89711.6	111185	146411	129705	122743
9.06_838.6265m/z	60208.1	78159.4	80233.6	81713.8	84038.7	61597.3	60919.2	75548	66773.7	91174	81646.7	70728.6	76428.2	54970.8	65361	83501.3	81805.8	82125.2	85401	84031.7	78231	55504.4	75568.6	65318.1	91424.9	95925.3	75214.9	93195.7	79651	74814	69485.6	70930.2	64544	71685.7	86204	60475.2	73854.3	101873	71916.2	77051.9	80645.6	78559.8	80165.8	69396.2	64410.8	70638.3	93859.4	93202.9	88420.7
9.09_1026.7896m/z	15247.8	9677.77	7563.81	11880.7	4542.62	9671.42	10810	7737.5	9291.33	8800.07	8781.6	8479.62	8650.53	8373.75	6158.9	6960.49	7554.62	6086.49	7813.37	6987.02	8569.44	4788.61	7409.38	6891.51	6904.92	6904.8	5243.12	7367.03	10926.7	6817.13	9435.58	9202.89	7286.59	8470.14	8448.62	9240.33	9276.82	6335.66	4537.02	7998	8825.78	8105.48	6900.39	9339.79	8511.95	9253.43	7333.35	8203.07	7570.72
9.14_644.6319m/z	43437.6	76249.7	75162.8	63469.4	28535.1	46872.8	35309.2	57829.4	33438.5	82549.4	67674.2	27622.4	44959.6	47669.7	37322	39631.8	63266	24511.9	75197.1	70411.3	63711.5	24277.5	84613.4	30590.4	39947.8	46497.3	28543.8	48969.7	77376.6	108074	66048.1	35482.5	27786.5	37821.4	30761.3	94205.5	60254.3	35714.6	42477.6	40614.8	86198.7	70911.7	60770.5	31664.7	38228.7	49751.5	127590	129398	52928.6
9.14_789.6891m/z	27906.8	29049.3	26003.9	25593.3	35979.7	27079.4	26847.3	27380.1	26817.5	23411.2	25577.6	26844.4	25965.5	26220.6	26189.2	35005.5	30455.1	27224.1	29516.9	36973.8	26448	26170.9	28058.6	32196.7	30191.6	27266.4	23588.2	26568.7	23368.8	27675.4	31301.9	24986.2	31085.3	29468.1	48853.4	27418.4	30956	40006.3	28267.3	30342	27805.6	32285.5	23162.4	30247.3	30106.1	34260.1	28635.5	27816.4	24792
9.16_682.5993m/z	25988.9	42417	26548.3	92003.6	137071	27525	30145.6	55953.4	25237.1	25699.6	90631.2	120363	25479.1	25057.1	26416.5	30693.4	28341.8	26632.8	26369.3	116920	23446.1	27143.4	26458.3	23680.4	45606.3	76330.3	27515.9	25126.9	24068.7	23241.1	30191.4	24310.8	31385.2	55079.5	304577	23957.3	26910.6	685784	44069.8	35497.8	25795.9	94028.4	27393.2	32680.5	28884.1	24616.3	31580	27522.4	23421.6
9.16_685.6271n	750132	892630	735239	1.00836e+06	1.16299e+06	721384	718158	1.1047e+06	738182	818760	985829	1.11157e+06	748498	637497	684787	853951	820961	796562	817819	1.54761e+06	807716	683063	860726	711148	1.04907e+06	1.33311e+06	839301	1.02631e+06	874208	952517	774958	674789	743272	917001	2.0305e+06	666156	735179	2.39294e+06	856764	789203	743278	1.01072e+06	741798	745422	755332	779716	920182	898179	830954
9.16_750.6590m/z	19272.8	33344.6	27266.6	44763.5	70342.9	21787.5	29340.5	85919.2	22473.8	23361.1	50760.5	62217.8	18852.9	16115.7	16593.4	23925.5	22532.3	21278.2	20314	120098	18280.4	19837.1	19805.5	18044.4	41593.4	60708.5	26741.5	29729.5	22832.4	20580.5	23528	18198.7	30613.8	41900.4	169043	16000.2	23737.9	163253	38648.2	25258.6	21072.7	50659.4	20054.9	26081.6	23652	20970	20584.8	24928.7	21050.8
9.17_891.8417m/z	15246.4	7053.71	7439.76	9855.54	11507	15066.8	10613.9	12934.4	20869.1	11518.3	18723.5	17784.2	10706.4	12058.8	10908.8	18849.8	13317.9	9176.13	13564	25087.9	22971.8	17565.6	16172.1	17547.8	13652.2	11910.8	13697.5	12927.1	22340.4	13780.1	14013.5	13486	13492.6	18030.6	22121.2	13796.9	13283.5	8236.09	12944	12039.3	10740.9	15756.4	15600.8	10703.4	15550.8	10473	12306.8	20216.9	10552.5
9.19_623.6213n	675118	830892	576924	547980	642517	555933	651655	610837	703633	679544	718463	611938	837074	638784	638075	709778	911380	657855	784255	738907	812029	677071	943647	775576	715238	951738	729371	866045	822393	906571	704485	575931	663782	777715	640669	676533	806201	673392	634179	685189	742622	832760	705107	680628	691714	828870	893157	1.13831e+06	677858
9.22_1062.8168m/z	298954	307836	306290	260339	262183	278982	283096	259759	257512	286099	268097	261853	269924	217455	262567	275234	285362	317566	282009	298111	275168	299016	295364	298855	281260	333576	357312	330356	306684	305408	299050	314717	289842	286081	302029	273600	274329	248325	297211	265425	268620	281274	270007	247892	267577	295631	300447	295361	297107
9.30_1036.7901m/z	59260.5	53240.1	58321.6	64575.5	64537.9	80177.7	59465.1	64445.4	66665.8	57088.2	66181.6	63239.7	56923.1	56502.5	63760.3	61143.1	60784.1	58443.7	55343.4	58231.7	64512	66717.5	85262.9	79720.7	74815.7	80023.6	67932.3	77048.2	82871.3	75790.8	63261.5	57914.1	63694.7	66179.9	62883.1	78576.9	77552.1	56064.8	58839.2	64581.6	50983.2	44714	53436.1	64962.9	62324.6	64504.2	64353.4	62588.7	63372.5
9.30_878.8148m/z	6024.77	5793.45	6918.97	8961.34	9593.3	7819.53	7299.69	7232.1	13042.6	9875.31	9413.75	10830.7	6595.44	5978.16	8730.73	6940.94	7612.97	6881.05	6119.94	9808.2	8105.29	5388.51	6013.86	7401.38	4008.75	10653.7	7740.61	10601.7	5431.46	7601.83	7180.22	7922.14	8526.79	5361.38	57123	10030.4	10386.5	13181.5	10426.3	9150.44	8618.21	11254.1	7006.38	8858.49	6790.95	7016.54	7859.45	6392.31	5812.94
9.41_658.6444m/z	77455.2	78502.2	93596.3	91259.9	87699	87702.7	62974.2	83999.9	74801.9	103517	80477.3	75898.7	88794.4	71968	80483.7	75436.6	85192.6	74237.4	79553.1	81680.9	90910.8	63120.4	101676	58176.1	69358.5	90153.4	69497.5	83893.6	91180.5	107791	91816.1	87951.7	62936.2	93489.6	65670.9	94982.1	79071.7	81293.6	78466.9	70070.8	95014.3	111520	75930	70530.4	74783.7	79132.7	108006	92953.2	88595
9.41_692.6829m/z	9241.39	13384	15713.3	15650.8	18725.2	16650.7	15565.5	17277.7	21208.7	18997.2	18624.2	18250.1	26823.1	17777.4	13727.3	20258.5	18976.5	17750.3	6907.65	12950.4	17380.7	16922.7	24496.8	14185.5	12359.2	13486.7	19507.5	16345.6	14730.5	15044.7	14335.8	18859	14804.3	23409.4	23717.5	15129.3	9750.81	30682	18217.7	23133.4	21658.8	15601.8	14491.4	19234.8	22821.6	20772.6	20369.5	10891.5	19647
9.43_656.6174m/z	88422.5	83120.6	78335.1	84247.8	100031	88111	80777.2	86957.8	99164.7	93302	88941.8	89573.2	107943	84634.6	77309.8	95165.4	76743.6	76969.7	72771.8	75466.6	82594.7	90412.2	91211.2	86204.7	94613	94985.9	98154.4	79674.7	88725.4	77838.8	76425.8	85783.7	77887.9	124067	89468.1	82724.7	70207.7	119803	93876	103359	94909.4	94721.9	78567.2	77258.6	89918.8	85728.4	72823.2	72214.2	77809.5
9.43_890.7628m/z	49388.2	57052.2	62101.5	60782.8	71182.6	51349.7	79652.1	61041.4	56577.8	101391	67982.3	67243.2	54913.2	53936.9	39752.7	51912.1	72335.4	61705	48420.5	82941.9	46177.2	48378.7	41125.2	44516.7	67952.5	62468.3	89043.6	82335.5	46667.8	49323.9	60234.9	62095.1	53411	74399.3	133594	53697.8	59389	83134.6	84832.9	60881.4	50119.7	116785	52693.6	47209.5	58725.2	45328.1	51137	44681	54181.4
9.43_893.6244m/z	35938	22965.4	21265.7	11361.2	19949.3	19302.4	23352.6	27826	23381.1	16475.9	18312.1	14378.9	19750.9	18605.7	21071.2	17933.3	22870.4	21617.2	24220.1	18952	19812.3	16854.2	21828.1	19707.2	17168.6	18005.7	20693.3	31610.4	31455.1	33829.3	32031.4	22618.3	23315.7	15994.9	21641	26214.4	28057.3	20715.9	19728.1	17530.2	19819.6	16653.9	20535.2	21118	20408.7	27678.5	18338.1	23868.9	25882.2
9.43_917.7209m/z	877426	834596	843154	804922	942836	882891	1.02972e+06	822867	987473	1.26479e+06	789201	883505	861233	771664	717232	809772	961937	863695	776431	929944	719079	794698	700771	787943	859454	791717	1.26199e+06	1.07367e+06	785185	749201	848624	885636	955968	970311	1.60227e+06	799159	846902	998210	1.13144e+06	822781	774064	1.21918e+06	806600	784985	839766	799917	733827	739282	880792
9.45_908.7372m/z	168060	168266	174952	175038	166724	132697	164802	144652	125539	187357	146011	145826	156882	134367	161787	159249	159689	174260	141814	135933	142988	134826	146421	138754	158455	135312	186763	204070	148509	147045	151892	188173	167719	176641	173256	161331	146501	181171	151723	164815	124313	196496	171416	155160	160727	132312	159131	146530	154188
9.46_932.7920m/z	496001	500884	476168	539794	538023	435630	591038	418905	520939	681473	461825	472361	484761	396545	363864	425253	491544	488942	402715	540074	409966	421904	372401	411141	521632	446761	698218	576444	418761	420616	453695	540208	495682	599426	899983	441192	435312	639425	690646	442914	388242	717199	446192	447269	465958	405535	415883	391604	471123
9.46_958.7024m/z	53778.2	32125.2	22405.9	20458.2	34532	18453	18509.8	25975.5	38780.7	19326.8	19335.5	20234.6	22730.9	19278.6	33405.3	20935.9	37187.1	23388.8	22112.3	23923.1	20220.1	22970.3	21485.3	19983.8	22113.4	25121.9	28969	22816.5	23323.8	24464.5	28720.9	35031.6	26183	17637.3	16697	27605	23843.3	27896.6	27123.9	21767.8	22328.6	30033.7	26858.8	25503.2	25201.6	22918.8	22576.5	26414.3	25057.9
9.47_872.6918n	375037	450650	422651	578291	486080	298198	589145	345718	389672	726747	431017	438511	413097	262838	247621	362357	344497	497614	259116	567872	304107	307840	238958	298730	547407	395894	797848	589254	326353	366498	328673	479621	391375	626432	947304	344923	306196	713124	696868	341569	252779	813660	392468	381543	365408	277531	313978	271310	347483
9.49_1065.8025m/z	163135	163456	190538	168945	198035	143094	178743	154074	172964	199797	156339	171768	170044	147855	131639	162828	169481	173815	139842	159842	141630	135780	118809	151371	157662	156640	191716	161019	143992	148799	144369	168849	185809	182286	213379	171444	151334	204181	222512	165754	145382	215990	157175	151048	183316	149847	153535	156241	142227
9.49_983.7776m/z	914322	987692	867679	890198	889501	858399	925856	852057	969840	880723	901720	889707	908625	842205	868481	871586	881607	921021	833246	832334	822945	837046	813113	895222	912804	849762	982344	1.15502e+06	847546	856288	988049	1.31274e+06	929561	913969	1.01279e+06	868910	915574	1.02129e+06	1.00288e+06	878147	846744	896297	919313	940573	853456	861352	819845	898971	834067
9.57_651.6523n	837163	869250	558441	647322	681752	632275	727825	659498	826204	742046	789245	692102	1.01881e+06	789479	736943	824502	1.18059e+06	833966	919783	867088	1.11317e+06	848447	1.3076e+06	1.0033e+06	855047	1.18917e+06	875437	1.05943e+06	1.08505e+06	1.26402e+06	714499	608990	753225	828347	687345	771321	928030	690499	692752	727820	833424	922694	762313	864408	839125	1.05179e+06	1.03198e+06	1.49362e+06	841081
9.58_550.6285m/z	31178	44653.5	27471.9	30533.4	32361.4	41248.8	34636.8	43412.8	42264.8	35831.5	32059.4	37682.3	39454.9	36011.5	39837.5	31096.8	41634.3	34028.3	35226.5	39045.4	35246.5	24597.1	36227.5	31212.9	22530	34695.1	31692.9	34802.6	30003.1	32495.3	24734.1	29316.9	38729.3	27903.3	31210.8	38666.8	42930	32621.4	45388.8	38370.4	39271.3	33600.3	39565.9	35714.4	30713.8	41959	36159.7	33526.4	40069.6
9.58_910.6651m/z	783252	772587	707157	735277	835895	723138	804976	898067	764621	801314	731692	867955	768013	707617	699081	745936	714194	744809	752202	1.06414e+06	680585	710874	686022	747335	789065	871570	836481	796758	725479	683556	764259	819092	780771	765818	970194	740066	728196	848989	822366	721239	701815	804436	759109	717916	731298	709118	739901	730991	737031
9.60_735.6618n	161441	226593	132422	392021	324892	160094	228374	234580	167338	185591	264763	312403	140889	148626	132465	200134	138883	150659	148054	408381	129886	133778	129920	132628	305435	371280	214049	162817	166967	138847	154071	134108	166590	249594	579579	150790	144945	426232	248914	163157	152588	281331	136948	223641	184158	137762	143019	151413	149700
9.61_778.6893m/z	63189.2	89645.4	61376.5	162018	133979	68218.7	98260.7	102458	68686.7	78698.7	111098	123567	56255.6	55798.5	50656.1	90207.7	60691.5	64104	60462.9	196183	53931.7	58075.7	56039.9	61164.1	133495	153046	87265.3	68935.7	59898	53416.2	71165.4	60226.8	67664.8	109501	251013	54197.4	59922.4	174777	98852.6	63100.9	51245.6	127392	57251.5	95381.9	71168.1	64115.2	67837.1	75854.7	67146.8
9.62_906.8436m/z	12411.2	14147.5	12460.2	13991.5	19667.2	15801.2	17526.4	9817.15	28077.9	25776.1	12851.1	13522.5	13164.4	11391.3	9320.02	17628.5	10985.4	9561.39	10822.9	10406.6	13744.4	13287	13623.9	14160.9	8992.99	13903.8	21355.8	12722.3	13962	14157.4	10789.5	9243.71	15365.5	16004.2	118953	15693.4	24893.3	19897.1	20596.1	18995	16285.8	21964.3	11621.8	11682.1	11585.5	11363.3	9282.58	11529.9	8166.84
9.62_967.7737m/z	3.03026e+06	3.18976e+06	2.77827e+06	2.99556e+06	2.9055e+06	2.87368e+06	2.92347e+06	2.95572e+06	3.01567e+06	2.88339e+06	2.8994e+06	2.94413e+06	2.93127e+06	2.86762e+06	2.71666e+06	2.89286e+06	3.0123e+06	3.11709e+06	2.89729e+06	3.22225e+06	2.93754e+06	2.85926e+06	2.78932e+06	2.98934e+06	3.15883e+06	3.1275e+06	3.09869e+06	3.27681e+06	2.92268e+06	3.03614e+06	3.22108e+06	4.13096e+06	2.86864e+06	2.81135e+06	3.19864e+06	2.85529e+06	2.88615e+06	3.28836e+06	3.1923e+06	2.79462e+06	2.69478e+06	2.9048e+06	3.00494e+06	3.00982e+06	2.86869e+06	2.82696e+06	2.89416e+06	3.19363e+06	2.94403e+06
9.65_929.7260m/z	66414.1	60354.8	53979.8	57732.4	47847.5	50818.6	59045.6	56408	59180.5	55092	60220.7	56922.4	55706.6	53819.9	62417.1	57827.6	52852.9	48233.7	56092.6	41929.3	44896.1	55390.7	45216.1	54840.2	50815.5	44498.2	44632.6	45384.8	55659.6	52740.2	61562.9	69668.5	58621.9	56556.4	49182.2	63575.9	62282	53453.7	59036.2	64886.6	61592.8	54153.9	59630.8	55475.7	44282.5	50761.2	60245.5	52754.2	51397.7
9.66_898.7041n	546144	803562	685778	901686	464874	409952	741381	475974	597192	768281	731342	563116	712148	445282	492586	583375	501544	868865	406453	709217	459262	484222	427942	509589	842965	472390	914041	1.51827e+06	522251	616763	616200	1.29868e+06	535062	746242	1.27439e+06	478890	528928	1.10146e+06	975558	551896	368134	860859	773375	813775	540419	472149	481239	496412	575328
9.68_962.7294n	926769	965794	848669	842429	875258	866783	905750	875265	923860	878980	858173	871488	933049	834366	839688	859648	875474	912257	860725	882711	795655	850968	805792	846967	911322	871147	961559	1.02939e+06	836632	840266	931159	1.17875e+06	879283	902401	942447	820530	905384	935614	962303	888629	853004	866680	888879	909818	839024	855289	827509	902838	875079
9.71_1069.7526m/z	127948	142914	160600	155213	133880	122704	208841	121896	157402	240225	157373	120164	161701	105848	101612	113491	106955	178014	96243	139138	104800	128978	101585	109331	161955	117912	323916	188270	131404	157112	115878	173222	127281	185237	252606	108585	132014	169060	261861	140124	87866.5	194775	119423	141434	119389	111426	87641	90613.4	132510
9.72_874.7050n	3.42991e+06	4.47056e+06	4.42951e+06	5.55968e+06	3.59022e+06	2.8855e+06	6.32553e+06	2.7327e+06	3.76545e+06	6.96872e+06	3.62528e+06	3.04732e+06	4.53419e+06	2.5274e+06	2.21139e+06	2.95815e+06	2.80112e+06	5.83339e+06	2.38301e+06	4.5261e+06	2.35698e+06	2.99809e+06	2.19595e+06	3.05834e+06	5.82385e+06	2.75872e+06	1.072e+07	5.53968e+06	3.33921e+06	3.59627e+06	3.18642e+06	5.7623e+06	3.03662e+06	6.5351e+06	8.03845e+06	2.68247e+06	2.90507e+06	5.8762e+06	8.05738e+06	3.10373e+06	2.12267e+06	6.29772e+06	3.68756e+06	3.48917e+06	3.62197e+06	2.63881e+06	2.80882e+06	2.35018e+06	3.92591e+06
9.72_913.6693m/z	293025	385592	366937	423147	280026	246130	528274	196005	333366	524984	310088	258494	433474	223217	182520	249042	221349	498253	193046	311391	201218	258288	192485	267238	456718	213130	808899	451353	279018	308519	286494	475930	242568	501133	540245	205376	264088	437372	635783	264780	178395	435230	338884	319697	294760	220692	214824	198294	341068
9.72_934.7901m/z	1.65364e+06	1.67945e+06	1.70923e+06	1.75696e+06	1.55272e+06	1.52085e+06	2.26448e+06	1.30963e+06	1.69594e+06	2.35877e+06	1.5254e+06	1.36214e+06	1.86829e+06	1.35133e+06	1.33649e+06	1.47501e+06	1.45857e+06	2.168e+06	1.34384e+06	1.57405e+06	1.29458e+06	1.51343e+06	1.3057e+06	1.54613e+06	1.82866e+06	1.30211e+06	3.3321e+06	2.02845e+06	1.52836e+06	1.59516e+06	1.51109e+06	2.03921e+06	1.49778e+06	2.15464e+06	2.38217e+06	1.43274e+06	1.54012e+06	1.83302e+06	2.45614e+06	1.51977e+06	1.2884e+06	2.09663e+06	1.58962e+06	1.55729e+06	1.56219e+06	1.38581e+06	1.36773e+06	1.38553e+06	1.74937e+06
9.73_864.7633m/z	319524	453783	428293	587074	678933	322968	431273	448256	330550	704335	468262	546853	346607	274094	280785	401172	356851	327281	314120	652397	356998	316114	308859	314295	549636	565203	469821	516699	397741	413327	357495	371680	417362	545827	775646	445218	315871	718780	583408	388501	300665	674778	330484	332044	372966	299933	404791	328656	348997
9.74_992.7827m/z	301538	319219	307676	320976	280033	319526	289468	302254	300741	297283	300735	300343	282306	282992	295425	286897	286726	278120	288818	339195	251620	271883	255977	286114	280468	277681	278968	300171	242215	244034	343671	575481	281769	317068	310762	289885	284756	341611	298334	280759	258842	262469	278187	301489	263595	267155	258823	298109	258279
9.75_687.6669m/z	39635.5	35109.6	38040.8	27353	46272.5	38234.8	38299.8	36323.4	39343	41800.2	31688.3	32794.3	49770.6	40284.2	41485	40098.8	52424.1	36723.7	49877.9	47337.2	60626.9	60076.8	74113.9	58379.3	55542.8	50698.1	45956.2	53233.2	65795.2	60794	39846.7	28052	40450.7	30914.9	36296.3	40171.8	51617.7	36060.8	37556.9	42037	45967.8	41823.1	44093.1	47174.5	42703.1	53979.3	45410.6	40724.5	53557.7
9.76_918.8061m/z	273869	292931	294400	316586	332608	255409	364558	236717	297176	467091	285980	291336	317489	217782	187829	267966	334682	338997	227014	353428	256629	244402	202529	209082	334159	293062	467538	411717	248484	271057	240930	338068	274265	375905	590766	259266	238294	430270	448859	256362	223607	548767	259569	270521	264679	251266	225655	217230	288538
9.76_947.7156m/z	184211	239682	194290	223567	133391	129995	198116	117573	195811	185392	194009	135847	213245	140065	140407	161853	171506	254375	124864	140437	130974	128285	131947	151497	219454	124160	272206	407715	135995	164404	230229	566571	148679	192519	261696	137307	149830	297023	279817	158929	113369	196567	225306	242096	152247	152889	149044	177069	181791
9.79_692.6044m/z	602489	553572	521109	512246	568881	540337	533254	511052	551965	490013	509021	520391	541283	529984	518705	501285	560031	523972	555026	483780	505693	495189	519278	536108	508829	524522	537041	520061	527314	514778	586211	513880	599253	469666	483363	558225	558344	466625	545117	525634	580975	456210	496720	550569	529850	556924	525415	540530	508044
9.79_835.7266m/z	170038	233280	203850	257260	237680	163359	184307	284024	172057	286747	256529	287758	164129	173860	151583	209632	178408	149231	167528	340966	163721	146241	167025	151984	277223	296466	184623	200424	183100	169723	197576	164306	187149	250221	357947	186303	158120	371390	253249	210048	168381	248717	165521	225053	180571	191770	198094	183026	170408
9.79_923.7691m/z	286775	316849	291186	272245	270921	294395	383281	225954	306931	377964	276360	259706	335863	233417	228600	260369	300745	351340	261688	282718	247470	270288	233122	226023	292716	248172	416834	366028	267135	282357	291132	381991	261377	366305	430567	245962	275242	337074	410922	282909	257514	406448	293972	275175	282692	271292	258854	250961	320111
9.80_848.6904n	1.55527e+06	2.31615e+06	2.10721e+06	3.51997e+06	1.86065e+06	1.09563e+06	2.96519e+06	1.58247e+06	1.59202e+06	3.08598e+06	2.10333e+06	1.79992e+06	1.8808e+06	1.25026e+06	960973	1.46056e+06	1.11589e+06	2.16807e+06	1.0943e+06	3.13793e+06	1.03812e+06	1.3985e+06	945882	1.34385e+06	3.32309e+06	1.58222e+06	3.83019e+06	2.52449e+06	1.6534e+06	1.63928e+06	1.43394e+06	2.14295e+06	1.26969e+06	3.5205e+06	4.70372e+06	1.10738e+06	1.11696e+06	3.50933e+06	3.6818e+06	1.53284e+06	917687	3.25617e+06	1.75321e+06	1.72735e+06	1.74397e+06	1.17464e+06	1.35844e+06	1.09559e+06	1.47058e+06
9.85_367.3283m/z	41030.6	38856.3	30235.2	33726.3	31186.8	33021	30396.8	32005.3	27280.9	29925.2	32956.1	37101.2	28537.1	31481	33148.3	28822.3	26753.5	33005	29151.8	27160.2	28444.4	25446.8	30436.8	23542	28246.1	33529.9	32475.9	44332.4	32482.4	31010.6	31129	34315.9	35542.5	34019.1	34219.7	31539.2	32507.9	65532.7	28533.8	38507	34020.8	35821.6	30842.4	28090.7	34637.8	31899.3	32183.8	31976.2	31104.5
9.86_710.6378m/z	93310.5	93628.8	94022.6	96322.4	103596	110880	93874.2	88640.6	105689	98336.3	105411	101071	103317	93601.3	92230.8	89792.2	101389	102088	101198	98290.6	97692.9	92140.7	100553	96535.4	95706.4	140067	104358	106173	87044.9	123360	117635	86171	108788	92509.9	99574.9	111255	102131	87825.4	108588	100160	110291	93060	100663	119447	97759.6	95578.9	94363.3	110119	101711
9.86_918.7565m/z	1.98944e+06	2.93051e+06	2.41981e+06	3.97384e+06	1.60635e+06	1.11185e+06	2.74996e+06	1.23946e+06	1.77051e+06	2.74302e+06	2.36398e+06	1.33627e+06	2.25598e+06	1.4565e+06	1.33571e+06	1.64437e+06	1.73911e+06	3.23995e+06	1.32534e+06	2.22041e+06	1.40232e+06	1.43113e+06	1.2606e+06	1.46667e+06	3.49431e+06	1.18678e+06	3.62924e+06	4.51077e+06	1.69836e+06	2.05861e+06	2.35504e+06	6.3839e+06	1.29014e+06	2.98677e+06	4.69209e+06	1.58222e+06	1.54132e+06	4.37271e+06	4.44955e+06	1.80093e+06	914169	3.44996e+06	2.68866e+06	2.60781e+06	1.8464e+06	1.36578e+06	1.60204e+06	1.63937e+06	1.92405e+06
9.86_977.8074n	1.50503e+06	1.65791e+06	1.4012e+06	1.70855e+06	1.32788e+06	1.08643e+06	1.5449e+06	1.09001e+06	1.40531e+06	1.52229e+06	1.38043e+06	1.15276e+06	1.45145e+06	1.15539e+06	1.17337e+06	1.22488e+06	1.40089e+06	1.69252e+06	1.10868e+06	1.26712e+06	1.10567e+06	1.14443e+06	1.04679e+06	1.11573e+06	1.64339e+06	1.09216e+06	1.83807e+06	2.1178e+06	1.19988e+06	1.31431e+06	1.4777e+06	2.6724e+06	1.20565e+06	1.53269e+06	2.09289e+06	1.18678e+06	1.2568e+06	1.97126e+06	2.05391e+06	1.23843e+06	981771	1.74155e+06	1.54939e+06	1.5162e+06	1.29609e+06	1.13767e+06	1.17214e+06	1.23131e+06	1.33944e+06
9.87_1010.8147m/z	402216	436611	373143	433321	398992	358075	406126	383528	400988	405859	391027	391664	397791	393486	378782	395963	459177	436690	398140	396832	377415	382500	368143	404445	415921	388343	444551	447890	381186	401415	466233	725830	387620	413939	417871	403422	406267	479965	466276	388905	383499	414348	413582	432911	406944	421542	377742	442492	358334
9.87_900.7230n	1.05064e+06	1.49333e+06	1.16933e+06	1.50222e+06	749854	696373	1.31824e+06	693491	1.02088e+06	1.17086e+06	1.18595e+06	712546	1.18864e+06	791302	777670	877388	933358	1.58027e+06	698436	957571	772443	751495	649683	763357	1.38266e+06	626333	1.61045e+06	2.16285e+06	908274	1.03198e+06	1.27181e+06	2.69328e+06	752927	1.25819e+06	1.84572e+06	821598	912117	1.82295e+06	1.82852e+06	958339	541661	1.31131e+06	1.40121e+06	1.45699e+06	949746	814047	846798	965385	1.02265e+06
9.87_973.7302m/z	105226	107736	94336.6	119755	57016.4	65647.3	74169.9	68480.9	87151.9	64684.3	102993	65072.6	73584.7	93882.6	80850.4	88092.4	138363	105502	86495.2	50924.7	93386	57134.4	76049.4	74097.2	85081.4	69369.7	74226.3	132146	64389.2	89049.3	193726	338868	69000	67545.8	94465.1	82941.3	80333.5	139279	82621.6	74920.5	60685.2	69881.2	119915	118275	76231	82546.9	71794	121365	79987.9
9.91_680.6894m/z	109398	87980.8	68500.6	115870	81114.2	78537.4	69602.5	79820.2	87449.6	77634.7	83189.9	85050.9	86714.4	73753.6	74914.9	86097.6	107748	78409.4	88913	85897	98832.5	71268.6	91632.1	69668	81389.5	95332.6	76859.2	80009.3	89711.4	94821.8	75177.8	86881.4	105952	79280.2	74219.4	93897.7	77417.6	73998.7	75527.4	78581.6	91046.9	77378	76431.9	105018	87624.9	101761	86831.3	101796	78351.3
9.91_910.6627m/z	535043	573899	509895	534297	460436	451746	539583	409032	452493	653179	429519	413610	468572	478250	498674	521832	526488	510067	478038	461956	449805	511633	455391	503054	529940	429070	551338	479497	477134	437526	482900	621761	468204	594212	557745	559210	473425	600383	704971	512122	492633	552234	481739	444473	470772	448975	578582	496865	493626
9.92_571.4725m/z	114196	136017	112681	181651	85999.2	59572.1	188642	54162.5	74347.2	264197	87755.4	66171.7	110221	68801.7	52736.6	66548.8	66522.9	145746	61278.5	141086	50867	116377	50883.7	76025.5	175672	58833.8	269608	91768	133601	103083	69521.9	164192	56132.6	299563	236206	61682.4	63103.9	119180	258351	105131	52449.5	187093	111048	83367.6	116110	81494.6	96563.9	49009.9	102264
9.93_1045.7438m/z	282322	384352	348869	543453	339671	176766	550157	209486	247881	578175	299651	282213	325647	217691	184818	261309	203104	415337	201920	441937	194540	322228	184651	253876	585479	176907	721564	372350	378734	289437	232697	438566	188441	668182	698008	176942	230023	487430	648962	258491	167995	580198	355784	266007	340885	219358	252583	168618	293406
9.93_850.7070n	1.05025e+07	1.51087e+07	1.34813e+07	2.32612e+07	1.20883e+07	5.90251e+06	2.10879e+07	8.04377e+06	8.74763e+06	2.38336e+07	1.17443e+07	1.03343e+07	1.12491e+07	7.21153e+06	5.07321e+06	8.43288e+06	6.59357e+06	1.44539e+07	6.45699e+06	20682446	5.54445e+06	1.03543e+07	5.17901e+06	8.27108e+06	2.38181e+07	8.00303e+06	2.89004e+07	1.29961e+07	1.32092e+07	1.13918e+07	7.90336e+06	1.5513e+07	6.72669e+06	2.74878e+07	3.17242e+07	6.42854e+06	6.96194e+06	2.18264e+07	2.66913e+07	9.74727e+06	4.92253e+06	2.45835e+07	1.14387e+07	9.69876e+06	1.15876e+07	7.21441e+06	9.17619e+06	5.0863e+06	1.01428e+07
9.93_995.8222m/z	100107	133228	125029	144200	88553.8	111465	107390	114674	113895	115211	107674	94813.7	95968.7	115126	88561.7	108802	109646	95366.4	94872.2	114373	96429.2	85032	102464	100968	127911	95291.9	116715	145791	86956.4	130732	124702	196562	93651.7	116018	121945	109344	91889.7	133022	102947	90313.3	78025.5	105787	114381	100363	94352.5	83059.6	102627	113628	73260.5
9.94_888.7604m/z	113764	145318	134022	209365	114017	85101.5	135380	129900	90806.5	189242	142390	128162	80949.5	128566	153048	175959	155707	119086	161235	143886	93109.7	91145	127105	104011	180346	128052	134363	116442	141507	114694	115841	142523	115036	173915	187467	192205	97376.6	195829	157554	179241	110932	199881	143930	127004	155471	104942	232585	123517	115362
9.94_907.6822m/z	50050	51849	48150.9	60522.4	49292.9	38239.4	42620.4	39176	29306.9	39440.4	47691.4	42749.9	34440.9	55499	83851.9	67424.7	69323	27876	68575.4	38031.1	49257.3	29350.8	54815.7	39153.2	53759.3	39304.3	29206.2	39490.4	47863.2	53314.5	49709.3	48905.9	40458.9	40607.8	31842.8	86293.4	42384.7	61198.8	36078.1	75079.6	46404.7	51655.7	55872.1	40486.9	48408.8	35344.3	107461	57702.5	35117.8
9.95_1750.3973m/z	27997.9	15325.1	106064	79794.1	22834.9	94131.6	289403	116080	9146.49	431366	16491.2	5779.02	59353	1361.03	1179.12	11176.1	14759.8	152451	95136.2	27911.7	1726.09	18610.5	1151.53	18098.7	40265.5	890.807	577814	38331.1	38386.6	23433.6	18452.8	194380	10034.9	509994	225927	4054.1	19520.1	39961	384539	19403.5	77806.3	169459	38095.5	3598.48	38177.1	12802.1	13328.8	77593.1	51180.9
9.95_706.6228m/z	325298	337140	284856	333737	335958	343041	286530	302696	343431	285303	317615	312212	314209	337329	359257	361919	356947	318354	359556	292358	332927	322335	358708	374031	307723	327309	307766	339102	363993	338723	347580	303754	349523	299698	292183	371672	344998	297609	301947	350119	329682	300429	309713	347535	331882	355277	344468	347040	322443
9.96_597.4895m/z	905952	1.03699e+06	1.0561e+06	914101	748899	863746	1.49173e+06	707229	972478	1.82139e+06	736306	747720	1.10582e+06	694988	668897	773674	802732	1.46424e+06	690497	1.11185e+06	653793	921605	644598	955596	1.20183e+06	729934	2.66366e+06	1.06028e+06	945208	887040	807536	1.24503e+06	798152	1.66358e+06	1.37908e+06	685545	869318	957324	1.84115e+06	889763	714547	1.26275e+06	919390	819172	983902	855470	746307	690696	1.15369e+06
9.96_933.6974m/z	50228.1	39610.5	37205	34533.3	22435.8	27666.1	32186.3	29843	20147.5	24413.8	34248.1	20674.3	28897.3	48661.5	66858.1	49066.8	48578.3	31883.5	54873.6	17781.7	43455.9	24800.3	43711	50706.3	28556.5	21534.4	25144.1	26413.5	28609.5	33868	41365.1	49669	40544.9	33413.3	19398.9	79766.8	39560.4	29373.4	28498.1	47361.4	37274.1	28212.7	46510.9	32390.6	39528.3	33766.9	67667.1	53897.2	32876.9
9.97_596.2763m/z	269677	305913	250334	237248	278732	230083	218456	243701	260870	228651	217321	216797	244386	215585	218743	233935	206876	232807	211617	259702	196795	199457	226516	195627	197513	227920	201709	206800	218919	213154	235313	293633	267005	235144	246698	248264	255022	249446	249114	235807	221041	222405	214204	218421	239076	217243	202843	219006	203165
9.98_1088.8319m/z	101557	110321	104711	115341	86092.5	106855	101970	82100.9	80860.8	132350	87412.7	64819.6	106621	105669	113587	94460.8	110403	125667	81380.8	72806.2	88819.2	102344	97266.6	94817.1	90477.4	53078.2	157536	99187	117416	94798.5	111366	152843	74050.8	120835	105207	82965.7	116605	102441	115699	102762	78440.2	115266	105338	96370.1	98625.5	106455	108332	100695	117386
9.98_871.8529n	2.7939e+06	3.70842e+06	3.46246e+06	4.80998e+06	2.74604e+06	1.80862e+06	5.8361e+06	1.5791e+06	2.55619e+06	6.64949e+06	2.56315e+06	2.11183e+06	3.35267e+06	1.75187e+06	1.25265e+06	2.00847e+06	1.7318e+06	4.50561e+06	1.58062e+06	4.33246e+06	1.38699e+06	2.8644e+06	1.27921e+06	2.41275e+06	5.43769e+06	1.55408e+06	8.69166e+06	3.44232e+06	3.45882e+06	3.09888e+06	2.03294e+06	4.30824e+06	1.65568e+06	7.25177e+06	6.8799e+06	1.63777e+06	2.07869e+06	4.34892e+06	7.19375e+06	2.49284e+06	1.31982e+06	5.758e+06	3.04221e+06	2.45205e+06	3.13088e+06	2.06696e+06	2.17509e+06	1.239e+06	3.29833e+06
9.99_1003.8199n	480493	636876	444541	593870	295626	348030	444862	380539	466512	334011	538799	337280	471784	434885	424049	421707	562212	602888	415078	389567	450619	330946	343717	400764	528318	293716	506275	937225	382409	501203	637339	1.47064e+06	312415	473796	592414	436480	418378	700538	589918	430995	298850	465012	614522	664030	367836	418255	364437	592424	444726
9.99_926.7393n	2.50443e+06	3.51225e+06	2.48157e+06	3.95915e+06	1.68943e+06	1.52043e+06	2.32435e+06	1.96681e+06	2.35422e+06	2.17285e+06	2.99568e+06	1.78079e+06	2.31667e+06	2.19963e+06	2.02217e+06	2.21344e+06	2.89965e+06	3.41606e+06	2.00091e+06	2.2915e+06	2.32601e+06	1.6443e+06	1.72025e+06	1.90807e+06	3.34963e+06	1.70462e+06	3.07857e+06	5.24575e+06	1.87839e+06	2.45657e+06	3.40533e+06	8.66986e+06	1.4669e+06	2.69348e+06	3.84388e+06	2.08921e+06	2.08206e+06	5.07092e+06	3.92795e+06	2.12044e+06	1.27821e+06	2.96637e+06	3.18245e+06	3.47091e+06	1.91412e+06	1.97495e+06	1.92094e+06	3.02373e+06	2.18723e+06
9.99_972.7964m/z	202022	259488	203975	250697	146729	162045	181525	186182	213589	167487	229003	164095	214502	199698	202393	180280	244060	262371	187271	162020	192947	179372	156288	171353	241776	151401	197093	375311	148449	205515	279995	522965	154954	208155	238191	183821	184069	294405	250239	190615	143277	200882	256865	250739	180342	186062	165873	235312	170954
[truncated: 41 more columns]
