# Supplementary material for: Lipidomic profiling reveals distinct differences in plasma lipid composition in overweight or obese adolescent students
Source: Research Square preprint supplement (doi:10.21203/rs.3.rs-33013/v3), 2021-03-09
Supplement: Supplementary file 3 [file 989cdae9bb3bf2f6e78782ab.xls]

## Sheet: obesity-B_control-diff-heatmap-
	control_13	control_25	control_39	control_88	obesity_44	obesity_41	obesity_57	control_78	control_29	control_81	control_48	control_75	control_19	control_95	control_42	control_12	control_22	control_52	control_72	control_101	control_35	control_32	control_58	obesity_70	control_45	obesity_14	obesity_34	obesity_77	obesity_28	obesity_37	control_15	control_68	control_85	control_9	obesity_47	obesity_64	obesity_24	obesity_74	obesity_80	control_55	control_6	control_62	obesity_97	obesity_87	obesity_100	control_91	control_98	obesity_90	obesity_94
0.38_1589.4056m/z	-0.0843185	0.243513	1.22054	1.54478	0.110019	0.571725	0.539688	0.576235	1.11018	0.668155	0.670492	0.275417	-0.436898	1.45385	1.10541	-1.0874	-0.310727	0.16691	0.302241	-0.146126	0.369864	1.31388	1.50753	0.612885	0.319747	-1.46643	-0.922216	0.601403	0.685273	1.08873	-0.321504	0.0968843	0.613741	-1.59998	-0.999969	0.989724	-0.101834	-0.10621	-2.27603	1.29679	-0.946453	0.264872	-0.444898	-1.25948	-0.681531	0.348205	-1.47067	1.29282	-2.79187
0.62_1122.5441n	0.748117	-0.968305	1.29725	0.331637	1.72381	-0.689654	0.302668	-0.0407007	1.18617	0.553394	-0.292372	-0.277065	-0.217144	-1.76386	1.9394	0.212698	0.701441	0.219395	0.738765	-0.191037	1.3856	1.44228	-0.47237	-0.355574	0.25472	-2.11112	0.829061	-0.0928721	1.00245	0.881931	0.029202	0.355616	0.165993	0.00333844	-2.21531	0.249986	1.25958	-1.43767	-1.13478	0.190783	0.629453	0.306308	-1.01581	-1.3624	-0.809456	-0.120256	-0.186508	-0.34677	-3.12091
5.70_928.5929m/z	2.28235	0.146029	1.11826	1.06205	0.364645	-1.09255	-1.67238	0.52445	-0.555563	-0.889648	-0.16397	0.574495	-0.0765719	-1.92641	-0.030197	0.90972	1.26357	-0.465191	-0.699349	-0.0644114	0.510893	0.568203	0.04011	2.02578	0.137483	-1.27278	0.337972	0.94395	-0.181795	-0.174754	1.28042	0.907517	1.49116	0.195852	0.516106	1.29274	-0.966987	-1.10135	-1.05597	1.8767	1.0862	1.03063	-2.22133	-1.02923	-1.48978	-0.251367	-0.151863	0.294698	-0.154809
4.45_623.5034m/z	3.59804	-0.190087	0.780597	0.407245	-0.301741	-1.14082	-0.913337	0.803752	-0.783858	-0.588553	0.526442	0.981297	0.293331	-0.819431	-0.423096	1.65821	0.901013	0.262217	-0.0316883	0.742588	1.53426	0.00771712	0.32121	1.98552	0.690448	-1.0289	-0.434544	0.38817	-0.55707	-1.084	0.42884	0.785555	0.628956	0.171571	0.860273	0.599052	-0.633829	-0.406047	-0.950271	1.44377	-0.0200921	0.81187	-1.82898	-1.47115	-0.990147	-0.144008	-0.329943	0.155815	-0.207847
4.45_900.5609m/z	3.21609	-0.00764922	1.0377	0.756959	-0.45089	-1.42855	-0.911551	0.785829	-1.21838	-0.679345	0.283042	1.38773	0.557054	-1.08223	-0.316041	1.52778	0.995739	-0.423248	-0.295846	1.3035	1.41481	0.00629285	0.450808	1.63578	0.596605	-1.32905	-0.0548155	0.369085	-0.697298	-0.77998	0.391185	0.855998	0.901626	-0.275508	0.842177	0.988989	-0.324436	-0.0844385	-1.06754	1.04609	-0.30545	0.539306	-1.51637	-1.23116	-0.552665	0.0194387	-0.240721	0.345363	-0.0240019
6.08_1791.1257m/z	1.06098	-0.338525	0.52626	-0.865025	-0.471608	0.550907	0.116294	0.920539	-1.86516	0.161259	0.0664169	0.161872	-0.273463	-2.7621	0.653668	1.44945	0.564173	0.438071	0.612064	1.37125	0.584307	2.02402	0.711491	1.25088	0.829452	-1.01717	0.272462	-1.65379	-0.260703	-0.742682	1.05148	-0.032302	0.515937	-0.429279	-0.324585	1.3028	0.477778	-0.402504	-0.969617	1.54346	0.581666	-0.010313	-1.99878	-1.12783	-2.02172	-0.419292	0.479797	0.136269	0.378105
6.70_653.5495m/z	2.52886	0.117816	0.489059	0.81466	-0.411	-1.8198	-2.08618	1.01826	-0.893638	0.157242	0.889337	0.0957045	-0.375345	-1.01409	0.413776	1.08884	1.55856	0.782916	0.297176	1.81971	0.0250683	1.32054	0.318278	0.98548	1.42233	0.0517721	-0.610669	-0.824138	0.0568385	-0.696357	1.86876	0.542545	-0.589498	0.0519392	0.145707	-0.582078	-0.692925	0.00812678	-0.763861	1.35679	-0.372716	1.31157	-1.8034	-1.39476	-1.35712	0.767583	0.152644	-0.892325	0.470215
4.86_625.5193m/z	2.60377	-0.747651	0.7273	-0.34505	-1.34313	-0.443323	-0.0880167	0.352066	-0.980733	-0.34439	0.248461	1.11089	0.257081	0.357617	1.85132	1.18031	0.687071	0.177765	1.07168	1.53564	1.78726	0.909171	1.1787	1.91219	0.0663629	-1.35948	-0.811302	-0.418743	-1.86586	-1.01529	0.815608	0.725148	0.484764	-0.228337	0.662015	0.644508	0.0065395	-0.314768	-1.32826	-0.782953	-0.690772	-0.351548	-0.696703	-1.11123	-1.6268	1.26531	-0.0852139	0.301708	0.166193
4.86_902.5761m/z	2.17813	-0.159266	1.09657	-0.366639	-1.29607	-0.125158	0.163992	0.347889	-0.49744	-0.456323	0.0750625	0.774994	0.274911	0.24538	1.78615	1.2385	0.621128	0.355389	1.17312	1.54851	1.83633	1.03164	1.18308	1.6696	0.249027	-1.46277	-0.497437	-0.833159	-1.44886	-1.09103	1.04445	0.83559	0.329831	0.067399	0.752271	0.352013	-0.0959691	-0.294532	-1.50805	-0.254917	-1.06497	-0.163671	-0.625172	-1.11781	-1.68034	0.618732	-0.224863	0.703783	0.0312474
4.73_599.5039m/z	2.89971	-0.36503	0.563266	0.443241	-0.60071	-1.19144	-0.543316	0.759504	-1.85437	-1.00764	-0.31161	0.284751	-0.244678	-0.26408	0.0953863	0.744999	-0.128805	-0.308024	0.136553	0.756463	2.19031	1.03308	0.162674	1.53144	0.695714	-0.942781	0.594019	-0.285522	-0.864071	-0.834485	1.39179	0.527045	1.11179	0.596647	0.9157	1.38202	0.508484	0.247151	-0.0431022	0.151167	-0.756256	0.0630844	-1.85006	-1.26416	-1.39568	-0.515507	-0.299806	0.397178	0.694305
4.73_858.5271n	3.00344	-0.36028	0.564895	0.455754	-0.629682	-1.12799	-0.572346	0.775175	-1.93796	-1.176	-0.198664	0.116204	-0.297896	-0.0918297	0.0414595	0.980707	-0.0907546	-0.237363	0.109426	0.740476	2.11744	0.892627	0.21396	1.40532	0.799114	-0.835553	0.560742	-0.369703	-0.868386	-0.907041	1.47608	0.39562	1.09292	0.767194	0.944555	1.24969	0.536344	0.0828962	-0.139738	0.169536	-0.805742	0.0400776	-1.56594	-1.09524	-1.31482	-0.382847	-0.378028	0.467222	0.806856
5.94_577.5196m/z	2.57367	-1.08304	1.28853	1.61646	-0.692251	-1.2433	-0.62084	0.68588	-0.882975	-0.334205	-1.14765	-0.215744	0.576667	-0.24416	-0.122514	0.208686	-0.0668465	0.606722	0.423329	1.23103	1.68578	0.309349	0.755872	1.55201	-0.350679	-0.143305	0.76806	1.12561	-1.00534	-0.403474	1.81162	0.812984	0.575676	-0.0524888	1.04923	1.44932	0.49853	0.445227	0.000783674	-0.454428	-0.821407	0.0630269	-0.668535	-1.13843	-0.34722	-0.438566	-0.600778	0.0395067	0.244707
5.95_836.5420n	2.46146	-0.941167	1.3588	1.81692	-0.619749	-1.18044	-0.52404	0.603422	-0.941329	-0.217962	-1.07467	-0.258432	0.552188	-0.443071	0.0788359	0.266937	-0.118494	0.65295	0.362335	1.27329	1.91695	0.390771	0.944021	1.47116	-0.247972	-0.338391	0.737214	1.13852	-1.06772	-0.282738	1.89015	0.92463	0.497697	-0.0624982	0.867784	1.74365	0.262773	0.277672	-0.252547	-0.412537	-0.815531	0.0576685	-1.06073	-1.13481	-0.563789	-0.506466	-0.696874	0.116026	0.125002
5.39_627.5335m/z	1.36259	0.1568	-0.0370429	-0.906794	-0.703354	-0.82466	-0.465845	0.329102	-1.67889	0.782723	-0.0672887	0.607938	0.238368	-0.205115	2.41197	-0.306227	0.948216	0.470352	1.51971	1.41535	2.45657	0.622194	1.04566	2.10201	-0.277238	-1.73992	-0.869051	0.592918	0.840041	-0.729888	0.065848	1.25756	0.0912014	-0.41982	-0.650127	-0.127316	1.35871	1.82206	-0.273345	-0.849814	-1.38127	-0.518672	-0.528026	-2.11791	-1.33671	0.553907	-0.600043	-0.0164016	-0.0922544
7.59_605.5508m/z	1.26727	-0.453621	1.24756	1.92831	-0.197443	-0.321753	-0.215294	1.1347	-0.511849	0.407874	-1.67425	-0.363594	1.88154	-0.281259	1.63351	0.429239	0.25028	0.903425	1.10653	1.75598	1.78557	0.860068	1.3539	0.924571	-0.710298	0.0789713	-0.30369	0.648291	-1.52993	-0.480926	1.65908	0.920581	0.000735039	-0.473659	0.589604	1.16822	-0.741278	0.128138	-0.413598	-0.733572	-0.896787	-0.580946	-0.372753	-1.10822	-0.814444	-0.258748	-0.930818	-0.295776	-0.243742
7.59_864.5722n	0.655687	-0.382171	1.37259	2.07976	-0.234538	-0.328091	-0.304923	1.19516	-0.516759	0.57267	-1.72793	-0.496111	1.86407	-0.189897	1.80948	0.372727	0.311501	1.02546	1.10795	1.71765	1.63073	0.716344	1.53473	0.575345	-0.658713	0.229561	-0.60843	0.837	-1.59954	-0.686538	1.7038	0.864321	-0.0189546	-0.25724	0.48367	1.24525	-0.822641	0.104028	-0.509368	-0.511722	-0.726439	-0.610807	-0.377777	-0.93364	-0.707444	-0.0437062	-1.05304	-0.329624	-0.275619
6.91_601.5191m/z	0.771694	0.284598	0.759708	0.476923	0.0242373	-0.716451	0.542712	-0.952893	-0.364179	-0.592392	-0.908357	0.58994	0.237429	0.954627	0.624976	0.765981	1.02124	0.417879	1.04659	0.561875	1.51546	1.40107	1.09797	0.772142	-0.452377	-2.89522	-1.18765	-0.6144	-1.46575	0.813347	1.18061	1.24248	0.285052	-0.349174	1.02982	0.627452	0.0824078	0.485363	-0.376304	0.273184	-1.14918	0.0823412	-1.51135	0.540848	-0.870307	1.76794	0.791359	-0.6305	-0.157252
7.95_1488.1142m/z	0.513818	0.0976484	0.407188	0.428079	-0.0606208	-0.184484	-0.111569	0.145657	-1.57541	-0.437685	-0.525655	0.0488955	0.636512	0.247589	0.3721	0.106041	0.0669775	0.471738	1.34138	1.30258	1.076	1.18988	1.24507	1.27693	-0.131297	-2.23678	-0.542036	-0.33384	-0.394713	-0.111018	2.00456	0.401035	1.03053	-0.49441	0.404169	1.21244	1.3111	0.155697	-0.0359197	0.487345	-1.55234	0.251236	-1.93534	0.387045	-0.403927	0.873026	0.959924	-0.144348	0.140762
0.55_142.0628n	0.41853	1.51083	-0.0878674	0.882104	0.332397	-1.04814	-0.49172	0.732337	-0.464689	-0.660661	0.568639	0.573902	1.59807	-0.397999	0.36365	0.0944522	0.348612	0.922275	1.71884	0.865906	0.274031	0.994166	-0.970707	-1.53057	-0.327632	0.0871934	0.230289	-0.633011	-0.382027	0.76695	0.568665	1.69589	-0.449597	-0.657535	-0.382306	-0.208871	-0.52721	0.0663641	-0.247279	1.02255	-0.611404	-0.12427	-2.43651	1.20829	-1.38338	0.434979	-1.45183	-0.708234	-1.84255
0.56_166.0841m/z	0.249726	0.995896	0.660967	0.944952	-0.291371	-1.05799	0.0466257	0.393867	0.564133	-1.45819	0.923093	-0.232574	1.0856	0.678923	1.05165	0.843858	0.852372	0.958147	1.53857	0.983994	-0.212559	0.753875	-1.90128	-1.2983	0.493008	0.584525	-0.394768	-1.10229	-0.285739	1.05167	-0.0985875	1.54284	1.14878	-0.493309	-0.498777	-0.448622	-0.4479	-1.23651	0.793538	0.828952	-1.26888	0.389217	-1.82266	0.687777	-1.91645	-2.28141	-0.739156	-0.557427	-0.281289
7.32_553.4357m/z	-1.52843	0.456737	-0.630266	2.22742	0.121882	-0.560304	0.267483	1.04472	1.26931	0.882238	1.63104	0.0715038	0.940427	1.98853	0.552687	0.644202	1.85302	1.20616	-0.296955	1.32051	-1.29849	-0.0830761	-0.397576	-2.38642	-0.87866	-0.979497	-1.1917	-1.0669	-0.429835	0.865353	-0.38781	1.32909	-0.147768	-0.460691	-0.596513	-1.74966	-0.479942	0.175738	0.157961	-0.411852	-0.0481259	0.420103	-1.02023	0.155181	-0.956889	-0.00554094	1.17265	0.561164	0.907548
7.51_460.3682m/z	-0.586648	0.412115	0.698097	2.07652	-0.620861	-0.334895	0.603222	1.43121	1.15255	1.38826	2.63405	-1.00045	0.163877	1.97951	1.43011	0.543883	1.3341	0.985036	-0.614904	1.52346	-1.07765	-0.739323	-0.882001	-1.10866	-0.502211	-1.1435	-1.1359	-1.0934	-0.651893	0.420007	0.253513	1.34218	-0.529755	-0.14482	-1.0777	-0.0505308	-1.52202	-0.819955	-0.383847	1.01848	-0.459582	0.289304	-1.18954	0.620656	-0.492409	-0.303648	-0.213553	0.40857	-0.773481
7.51_552.4336m/z	-0.400052	0.492712	0.854824	2.03796	-0.651399	-0.349782	0.534842	1.37256	1.31869	1.36447	2.45084	-0.954818	0.138331	1.92216	1.43993	0.589543	1.43142	0.908821	-0.44589	1.20851	-0.683064	-0.56301	-1.09443	-1.06677	-0.390614	-1.29696	-1.36883	-1.36325	-0.738884	0.556529	0.32561	1.41065	-0.484242	-0.259875	-1.07694	-0.0802195	-1.31571	-0.940635	-0.147755	0.924079	-0.341506	0.216634	-1.44161	0.72951	-0.524743	-0.250746	-0.223337	0.373751	-0.803388
9.26_537.4430m/z	-1.12865	-1.0465	-0.745776	-0.388744	-0.0350536	0.506921	-0.398621	1.82707	0.0688617	0.659903	0.509689	-0.697754	0.728767	0.658364	2.04092	1.16456	3.54131	0.433739	-1.3922	1.10479	-0.618844	1.04444	-0.475964	-1.26409	-0.429393	-1.45744	-0.208228	-0.0890271	0.325537	1.84134	0.189856	0.498645	0.257083	0.860099	-0.0394895	-0.600469	-0.377057	-0.21011	-0.645977	0.786197	-0.251938	-0.410715	-1.09746	-0.146104	-0.929758	0.110738	-0.852731	-0.298602	-0.334399
9.55_444.3731m/z	-0.394025	0.0702957	-0.0961338	0.750617	-0.477361	0.270198	-0.366655	3.20137	1.16237	1.34454	1.43396	-0.345659	0.610592	0.721966	1.68026	0.741594	1.65325	1.55179	-0.0856051	0.744256	-0.592546	0.112388	-0.352769	-1.30156	-0.671496	-0.806763	-1.24271	-0.40358	-0.600844	-0.529055	0.0411358	1.37917	-0.360354	1.71063	-0.920854	-0.505661	-0.531731	-0.394544	-0.278613	1.11327	-0.0231988	-0.87128	-0.696161	0.720234	-0.371041	0.342722	-0.518439	-0.736511	-0.749765
9.55_536.4368m/z	-0.547296	0.426726	-0.31282	0.62213	-0.41311	0.394396	-0.412115	3.09864	1.08679	1.01784	1.16977	-0.776762	0.814921	0.839827	1.78382	1.18324	1.80429	1.63054	0.0555142	0.899119	-0.937155	0.15401	-0.719932	-1.43441	-0.812594	-0.790705	-0.715997	-0.449244	-0.857435	-0.169466	0.256535	1.33102	-0.191699	1.67952	-0.74364	-0.360774	-0.6747	-0.736254	-0.443394	0.983163	-0.0806813	-0.761218	-0.579071	0.30861	-0.65497	0.220511	-0.336681	-0.553865	-0.520298
0.63_1386.6873m/z	0.581525	0.976133	-1.09154	0.256684	-0.750565	-0.677976	-0.753555	1.14308	0.618681	0.328975	0.536262	0.259861	0.9699	-1.72284	1.08362	-0.128983	-0.179064	0.737757	0.365245	0.139347	0.318451	0.54384	0.943114	-1.34435	-1.44964	0.971022	-0.353159	0.855368	0.000897254	-0.00850521	0.358298	0.170464	-0.366011	1.77059	-2.57392	-3.97087	0.0460464	0.327411	1.18662	0.753611	0.951029	-0.356145	-1.47174	-0.705181	-0.244998	0.48232	0.749889	-1.15523	0.0459592
8.02_828.5913m/z	0.901986	0.712903	-1.48239	1.37871	-1.03366	0.166925	-1.50858	2.09901	0.501492	0.377695	0.111902	-0.357693	0.461333	-1.32634	0.546691	2.2036	0.954383	-0.901067	0.997271	0.612968	0.566397	-0.577551	-0.0357659	-2.29609	0.159653	0.728716	0.314152	-1.27984	0.214728	-0.599556	0.330802	-0.653399	0.612101	-0.335638	-1.84206	-1.8474	-1.78285	-0.510655	-0.393251	0.319843	1.37646	-0.862695	0.357591	-0.952375	0.221296	0.202541	0.972069	-0.549342	-1.1763
6.30_1948.8542m/z	0.580333	1.5243	1.60517	-0.672209	-0.716606	0.0309582	-0.933611	1.15577	-0.396161	-0.854548	-0.468775	-0.651451	1.5763	-0.824771	2.68746	-0.102466	1.95854	-0.483607	-1.4386	0.0489353	1.08665	-0.163096	2.64869	-1.41332	-0.994303	0.309895	-0.858776	-0.963363	-0.44136	-0.704857	0.496044	1.19345	-0.866719	0.0723521	-1.15089	1.48319	-0.901917	-0.484203	-0.223275	1.8916	-0.0569382	-0.0865602	-0.0592015	-0.253374	-0.811765	-0.468271	-0.508419	1.57906	-0.705056
10.66_1108.9164m/z	1.07376	1.1841	0.103466	-1.02874	-0.715843	0.314341	0.125013	1.73994	1.57622	0.920046	0.666268	0.931219	1.61934	1.81969	0.922026	0.663461	0.130939	-1.09845	0.716264	-0.186061	0.153886	0.219014	0.0810967	-2.29106	0.768932	1.30747	-0.298448	-1.37151	0.704166	-0.277635	0.859555	-0.353334	-1.61589	-0.233522	-1.22574	-2.18029	-1.05145	-1.12403	-0.613635	0.457208	0.28469	0.874997	0.843728	0.490691	-0.194745	0.0562824	-0.643714	-0.577891	-0.754626
8.46_828.5792m/z	-0.0563757	1.5862	0.727089	1.21489	0.33677	-1.14112	0.129545	2.36649	0.940315	0.426339	0.49947	-0.354515	-0.196666	0.615509	1.69439	1.67742	0.681836	-0.0660764	1.24522	-0.61486	0.115838	-0.540452	0.991971	-1.63059	0.829648	-0.553777	-1.12773	-1.87918	-1.00169	-0.315901	-0.679462	-0.278823	0.569276	-0.121926	-1.07453	-0.569474	0.182338	0.92179	-0.881063	1.29949	0.22502	0.132381	-0.373497	-0.536713	0.790857	-1.61274	-0.164088	0.288686	-1.65169
10.48_1077.9314m/z	0.725966	0.102251	-0.134621	-0.0919169	-0.808203	0.117004	-0.112859	1.01878	0.789301	1.74473	0.927869	1.60573	2.54366	0.766393	-0.0133718	0.476221	-0.5501	0.113906	1.32882	1.66325	-0.37657	-0.580869	0.558035	-3.62084	0.462546	1.64277	-0.906253	-0.759746	0.175022	-1.38211	-0.028346	-0.306035	-0.42148	-0.858395	-1.32524	-0.71354	0.0727527	-0.367178	0.981171	-0.439946	0.487989	0.228861	1.45548	0.743197	0.0363692	-0.397927	0.376119	0.294429	-0.411857
5.09_1244.7872m/z	0.704078	0.44956	-0.349368	-0.888576	-0.704791	-0.975278	-1.21168	0.412633	-0.444944	0.457314	1.08365	0.56841	1.97024	-0.379023	0.078789	1.23976	-0.265659	0.877599	2.09036	2.93709	0.850271	0.111937	1.6039	-2.70082	0.654613	0.086988	-0.509942	0.304892	0.0283795	-0.82351	0.255463	-0.373296	-0.698624	-1.92785	-0.813643	-0.933166	0.527637	0.299079	0.210736	0.829357	-0.665975	-0.242298	-0.0943246	0.76696	-0.511889	-0.0394327	1.55427	-0.216173	-0.48439
8.27_1336.8629n	0.752431	0.0284861	-0.781275	-0.662076	-0.84759	0.136587	-1.13028	1.60786	0.576602	0.807468	0.63036	1.39505	1.74718	0.0518019	-0.348672	0.212608	-0.740994	0.424101	1.41609	3.16819	0.207303	0.201021	1.30625	-1.85545	0.849963	0.148757	-0.946716	-0.674073	-0.432543	-0.882735	0.138167	-0.477209	-0.88155	-1.35221	0.01953	-2.50612	0.643234	0.373467	-0.249971	-0.00876605	-0.941192	0.75353	1.55823	-0.481519	0.520242	0.661639	1.70593	-0.0960966	0.28414
11.05_888.8737m/z	-0.319968	-1.29207	-0.883466	-0.632474	-1.07034	-0.451912	-0.334333	1.93358	-0.0959661	1.08616	0.333132	0.942141	-1.12134	1.17066	0.390976	-0.166015	-0.222628	1.48471	1.44154	2.46085	-0.411949	0.785259	1.38499	-2.03791	0.0597177	-0.0291161	-0.753912	0.316064	-1.02608	-0.0354094	-1.19955	-0.201952	-0.215033	-1.25967	-0.8101	0.681534	0.197734	-0.240535	-0.679196	1.72372	0.552961	0.0225179	0.709467	0.489227	0.879526	1.75005	1.24753	0.416284	-1.09215
11.30_916.9058m/z	-1.06792	-0.703752	-1.04547	-0.356393	-0.41306	-0.674155	0.0673241	1.97101	0.119864	1.22724	0.231007	0.476697	-0.284623	1.03468	0.215035	-0.769637	-0.178267	1.07619	1.7072	2.55916	-0.651793	0.881394	1.3008	-1.12225	0.121309	-0.384568	-1.30447	0.644347	-1.22071	-0.333241	-2.07498	0.537754	0.240531	-1.83829	-0.693133	0.375613	-0.516146	0.102619	0.545556	1.40908	-0.0940625	-0.059598	0.799822	0.575136	1.23825	1.54695	1.60697	0.373412	0.0196631
10.21_804.7800m/z	0.15066	-0.900046	-0.41015	-1.47024	-2.07829	-0.982989	-0.291674	1.34705	0.28901	-0.0158365	0.487793	0.428774	-0.62822	-0.0841608	0.909566	0.545755	0.0983976	0.865067	1.54319	1.73994	0.397912	2.03779	0.713769	-3.06829	-0.22788	-0.36914	0.202213	-0.302696	0.516884	1.3682	-0.590274	0.632717	0.199729	-1.48509	-0.175155	0.294284	1.28191	-0.762796	0.449373	1.63016	0.197364	0.169005	0.290346	0.926926	0.129671	0.0954214	1.10296	0.415415	-1.14562
10.79_860.8438m/z	-0.277543	-0.369641	-0.301342	-1.88097	-1.30451	-0.146937	0.339234	2.31485	0.350101	1.06087	0.561415	0.784331	-1.32323	0.881338	-0.304471	-0.0961503	0.409422	1.16744	1.53084	1.58403	-0.242166	1.79575	1.20994	-1.30396	0.384189	-0.0959843	-0.172676	0.244661	-0.820127	0.822065	-1.63966	-0.577811	0.183976	-1.50995	-1.23813	-0.0698783	1.11516	-0.559593	-0.537214	2.00545	-0.188087	0.513358	0.2078	0.604821	-0.697114	0.841056	1.29331	-0.236233	-0.530407
10.36_804.7764m/z	0.930151	0.568575	-0.88139	1.95035	-1.48204	-1.67589	-0.138412	2.07398	-0.1909	0.588035	-0.63599	0.383912	-0.359959	0.843914	-0.737823	-0.226853	-0.742432	0.733545	1.52244	1.79702	-1.1596	0.179772	-0.283445	-1.39095	-0.522877	-0.186844	-1.20299	0.637317	-0.862832	-1.23859	0.918802	1.14306	-0.245269	-0.80094	-0.758382	0.375595	1.02308	0.118571	0.536937	0.998776	0.296868	0.00116072	0.569534	1.14988	1.54581	-0.00223929	1.65142	1.02789	-0.243267
8.34_830.6070m/z	0.95603	-0.115941	-0.378696	0.871633	-0.569147	-0.534424	-0.735117	2.08954	-0.564069	0.701881	-0.0653462	-0.538451	-0.136276	0.386443	1.02371	1.84156	-0.83932	0.490268	0.950692	2.22002	-0.936144	-0.500952	0.776554	-0.583665	-0.440816	-0.106904	-1.5437	-1.01909	-0.868933	0.215733	0.115564	0.264486	0.099208	-0.995815	-1.73468	-1.05607	-0.480114	-1.47853	-0.0058077	2.16195	0.703808	-0.0934134	1.06712	0.535538	1.17726	0.480928	1.10547	-0.665311	0.542282
7.95_1496.1259m/z	0.60088	-0.176268	-0.404781	1.12889	-1.4362	-1.06499	0.568188	1.27927	0.163053	0.260483	-0.284201	0.758681	0.841176	-0.0535382	-0.149517	1.16582	-0.969773	0.352032	2.37719	1.22675	1.9878	0.753015	0.831767	-0.394541	0.775338	-0.27483	0.765385	0.341477	-1.1703	0.270155	0.557967	-0.604581	-0.214994	-1.12495	-0.266227	0.223159	0.71231	0.848986	0.197898	0.902143	-0.501731	-1.94376	0.0653374	0.727147	0.0943494	-0.228825	1.28372	-0.366356	0.125813
7.95_1520.1156m/z	0.707311	-0.140459	-1.21063	0.571998	-1.83355	-0.585205	0.421491	1.15859	-0.0684915	0.413868	-0.58205	-0.0976851	1.50012	0.643507	0.0802626	1.60724	-0.40749	-0.0708152	2.63197	1.10765	1.26557	0.817083	0.749008	0.486195	-1.47416	-0.132223	0.0970978	-0.746534	-0.975069	-0.696267	0.499627	0.635008	0.496855	-0.894805	-1.63078	0.0407136	-0.111049	0.0844013	0.380341	0.0909913	-1.74373	-0.362159	-1.55032	1.18085	1.00144	0.439487	1.42539	0.0975907	-0.38375
8.33_1264.8427n	-0.138899	0.0336308	0.530731	0.179018	-0.133265	-0.378759	-0.224054	0.0276427	0.633079	1.33802	0.206026	0.954919	0.548979	2.41032	1.13994	-0.619625	0.0467822	0.816096	0.262069	2.75944	-0.401004	1.26826	0.861885	1.06535	-0.713979	-1.13129	-0.0627898	-1.05572	-1.14395	-1.24236	-0.457357	0.177912	0.423313	-1.02292	0.0373812	-1.61368	-0.0478231	-0.0868223	-0.323401	0.0759775	-1.06231	0.219787	0.318016	0.318787	1.02537	1.32408	1.22401	-0.302108	-0.197125
6.47_769.9681m/z	-1.03456	-1.05431	0.157451	0.478391	-1.08194	0.473521	-0.145938	0.724956	-0.404973	0.520174	0.0642223	1.31826	1.02414	1.77654	2.07642	0.0356927	-0.406771	-0.21199	2.11123	1.88264	1.88751	0.344201	0.933295	-0.24392	-0.0313469	-0.837487	-2.3538	-0.59094	-0.869644	-0.387635	-0.822968	-0.535804	-0.737514	-1.36257	0.418661	-0.137295	0.116814	0.670678	-0.438794	-1.21617	-0.812173	-0.26952	1.80813	0.247848	1.03397	1.4931	1.19143	-0.00359978	0.567004
8.41_604.6007m/z	-1.51845	0.38155	0.0385962	0.146346	-1.45733	0.567054	-0.637271	0.822925	0.513302	0.52306	0.451646	0.97439	1.10348	1.30616	-0.474028	-1.39339	-0.474211	1.04492	2.0999	2.26123	0.738319	-0.09088	0.924218	-1.93812	0.150406	-0.834367	-1.39211	-1.32151	-0.138825	-1.05389	-0.0301348	0.248759	-0.336059	-2.03073	0.314887	-0.847571	0.244754	0.239671	-0.709864	0.712036	0.184755	0.885156	0.779979	0.480821	1.54175	0.826336	1.41975	-0.339391	0.911989
8.78_1135.7992n	-0.29434	0.128408	-0.598213	0.961479	-1.09181	-0.126327	-1.27578	1.50691	-0.0220723	1.3963	-0.625012	1.43541	0.2817	1.85356	-0.231114	-0.431349	-0.564633	-0.450983	1.62483	2.92409	-0.266226	-0.891458	0.254956	-1.5049	-0.389412	-0.450626	-1.35835	0.0737276	-0.179626	-1.10423	0.00489839	-0.491002	0.514731	-0.947419	-0.599666	-0.987792	-0.639279	0.555901	0.232255	-0.779476	-0.0685363	-0.498972	1.927	0.797468	1.70588	1.0719	1.64947	0.724389	1.12218
6.47_784.7279m/z	-0.354176	-0.737661	-0.235542	-0.591539	-0.514712	-1.04387	0.449033	0.324418	0.227676	-0.198533	-1.12349	0.777612	2.18955	0.848088	2.65799	0.707213	0.748657	0.937876	1.05268	0.669723	1.00073	0.788384	2.20358	-2.13666	0.489014	0.349444	-1.37703	-0.405752	-0.123656	-2.19824	-0.644623	0.859091	0.0563771	-0.395373	-0.227302	-0.788419	0.0676029	0.49113	0.00680863	-1.31559	-0.860968	0.335408	1.70821	0.0334412	-1.01898	1.58224	1.40461	-0.306771	-0.143648
6.47_784.8411m/z	-0.148259	-0.060923	0.398615	-0.670599	-0.791416	-0.0994391	0.344594	0.8679	0.106578	0.621563	-0.0138531	1.38667	2.67399	-0.0906037	4.43401	0.722478	0.851861	0.259791	1.76864	0.783267	1.28469	1.42197	1.41372	-1.33575	-0.780614	-0.419944	-1.58065	-0.309594	-0.386104	-0.866596	-0.335294	0.535595	-0.438123	-0.296961	-0.356031	-0.392179	0.160564	0.418929	-0.362726	-0.932965	-1.45389	-0.622705	-0.0222215	-0.0558587	-0.248616	0.571069	0.00879827	-0.531576	-0.500647
6.43_784.6711m/z	-0.499279	0.104768	-0.314538	0.0790271	-0.529062	0.938048	0.0336061	0.317853	-0.564857	0.393676	0.400035	0.0711244	3.38701	0.117918	3.03899	0.230677	0.856144	0.130964	1.84128	1.07735	1.10974	1.06244	1.45947	-1.7346	0.0761708	-0.198244	-1.28865	-0.580087	-0.224796	-0.920842	-1.17545	-0.220445	0.209088	-1.00356	0.241955	0.0706404	0.826782	0.15757	-0.721257	-1.77979	-1.10897	-0.541966	1.16307	0.315049	-0.147739	1.1558	0.605395	0.00870265	-1.32531
6.46_411.7701m/z	-0.539709	0.251337	0.109288	-0.368089	-0.455173	0.682636	0.447923	0.0983137	0.431343	0.609153	0.00895133	1.07969	2.22291	0.317644	3.24313	0.711396	0.729338	0.743344	1.72677	0.852871	0.878769	1.54637	2.02533	-1.51174	-1.00784	-0.230311	-1.95004	-0.995204	-0.886355	-0.693122	-0.66896	0.815094	-0.378575	-0.564104	-0.0459099	-0.347189	1.08834	0.240276	-0.428506	-0.92603	-1.12613	-0.737603	0.858693	0.209637	-0.711649	1.55115	-0.0951276	0.0297149	-0.849427
6.46_1567.1516n	0.383935	0.262821	-0.233359	-0.312007	-0.864471	0.364201	0.303431	0.734436	-0.0827507	0.403074	0.117992	0.849367	2.20082	0.650543	2.59719	1.31831	0.691681	0.452894	1.84119	1.56913	1.29854	1.29355	1.58303	-1.2806	-0.568928	-0.568812	-1.46671	-0.771835	-0.711909	-0.716029	-0.837335	0.423168	-0.264338	-0.511426	0.0157322	-0.0986914	0.863402	0.262116	-0.390677	-1.13858	-1.77933	-1.03479	1.01883	0.264299	-0.31092	1.41271	0.483337	-0.0182877	-0.358838
6.47_783.5798n	0.29096	0.373181	-0.28547	-0.363181	-0.988799	0.282349	0.420107	0.754128	0.00482763	0.483704	0.0234062	1.01609	2.35368	0.656817	2.73482	1.29008	0.889873	0.489772	1.78066	1.37674	1.20851	1.27626	1.50629	-1.29417	-0.602727	-0.180315	-1.65866	-1.04735	-1.08134	-0.878296	-0.816738	0.374746	-0.377069	-0.414199	-0.206239	-0.361563	0.880025	0.167991	-0.599984	-1.16196	-1.50333	-1.36213	1.0286	0.264722	-0.339348	1.50846	0.635974	0.148701	-0.310051
6.47_977.6098n	-0.0601774	0.287195	-0.0874454	-0.311821	-0.933963	0.486042	0.523561	0.592121	-0.0862845	0.547369	0.042491	1.12825	2.28496	0.556867	2.9075	1.17683	0.794339	0.578842	1.84333	1.31249	1.05238	1.12046	1.6417	-1.39135	-0.640853	-0.517627	-1.77526	-0.859771	-0.819059	-0.838859	-0.838432	0.535232	-0.369608	-0.559522	-0.174972	-0.0595485	0.86074	0.224937	-0.367284	-0.999648	-1.69532	-0.929274	1.08913	0.204582	-0.421855	1.41435	0.464775	0.00526434	-0.426831
5.31_782.7135m/z	-0.42986	0.0695646	1.61991	0.442552	1.24747	2.48542	0.0373004	0.034818	0.5639	0.580756	-0.209713	0.880218	1.21125	0.192886	1.81912	0.375525	0.316212	1.31838	0.964438	1.15477	2.2489	1.78923	1.64974	-0.910272	0.282971	-0.863968	-0.78885	-0.338783	-0.375497	-0.426014	-0.870043	0.197397	0.163732	-0.641971	0.229978	-1.33096	0.579967	-0.594318	-1.26026	-0.781771	-2.01733	-1.16951	0.370908	-0.63941	-1.32054	-0.00537776	-1.05492	0.5018	0.521033
5.31_1563.1193n	-0.27466	0.294796	0.316493	0.558159	0.445016	0.776298	0.62946	0.540306	0.342438	0.729793	-0.582058	0.697129	1.6089	1.1407	0.665334	0.558455	0.730903	0.650995	1.16391	1.43475	1.53275	1.05308	1.07721	-0.337169	-0.895141	-1.00669	0.371856	-0.407828	-2.15898	-1.86535	-0.203802	0.33922	0.160902	-0.245367	0.259173	0.355452	0.658218	0.551198	-0.936881	-1.23199	-1.8548	-1.433	1.177	0.619147	0.120879	1.07648	0.0335164	0.518779	0.623397
5.31_782.5704m/z	-0.211636	0.163869	0.372498	0.625127	0.43371	0.755645	0.509565	0.419214	0.11479	0.596095	-0.854982	0.521682	2.08645	1.31973	0.90554	0.350597	0.761578	0.626556	1.01651	1.45302	2.03219	1.12421	1.17055	0.86777	-1.13977	-1.09552	-1.56177	-0.49701	-1.65709	-1.37392	-0.420981	0.277752	0.0114599	0.0596487	0.140137	0.54102	0.733236	0.689233	-1.05899	-1.19182	-1.88738	-1.64707	1.20853	0.435679	-0.298027	1.27312	-0.198862	0.328619	0.665702
5.31_840.6231m/z	-0.298485	0.297052	0.263383	0.702072	0.34375	0.920996	0.65166	0.733534	0.169321	0.934914	-0.843866	0.898419	1.57955	1.2581	0.728857	0.43278	0.724518	0.717252	1.15061	1.46638	1.46144	1.0838	1.09099	-0.866187	-0.905493	-1.04515	-2.01688	-0.272351	-1.73541	-1.28893	-0.466523	0.303571	0.135013	-0.222672	0.139689	0.402715	0.664332	0.64341	-0.978486	-0.883995	-1.81939	-1.48852	1.31576	0.85842	-0.000288663	1.31487	0.0391944	0.596353	0.632717
5.30_745.4780m/z	-0.509503	0.176075	0.511505	0.312986	0.224296	0.954491	0.660073	0.430936	0.296001	0.666428	-0.761143	0.55174	2.29352	1.31447	0.917909	0.40734	0.867562	0.558405	1.14661	1.69397	1.98448	1.24016	1.22475	-0.299303	-0.943717	-0.675592	-2.25214	-0.506404	-1.48879	-1.33687	-0.396301	0.11121	-0.129782	-0.275871	0.162573	0.139226	0.62666	0.295325	-1.03374	-0.757386	-2.08725	-1.61508	1.29529	0.61532	-0.108839	1.29543	-0.331346	0.335863	0.384145
5.31_781.5630n	-0.49429	0.212672	0.179519	0.442538	0.312253	0.87148	0.674793	0.487942	0.130324	0.620216	-0.895468	0.644158	2.34927	1.33316	0.753411	0.616314	0.788444	0.57806	1.27609	1.6595	2.04245	1.30454	1.18758	0.233063	-1.05561	-1.06692	-1.95253	-0.522385	-1.51704	-1.36763	-0.6226	0.115137	-0.0337802	-0.177301	0.0762715	0.180248	0.646247	0.366978	-1.07423	-0.960597	-1.82791	-1.41385	1.27398	0.577407	-0.0893105	1.27435	-0.220117	0.419251	0.482157
5.31_975.5929n	-0.395983	0.217263	0.333795	0.576347	0.456636	0.865764	0.6009	0.509716	0.250217	0.77002	-0.893098	0.66862	2.03682	1.29101	0.697028	0.528586	0.785753	0.612823	1.20687	1.59526	1.84446	1.15522	1.2677	-0.0828543	-1.09624	-1.10178	-2.20685	-0.414304	-1.53752	-1.3163	-0.481945	0.234769	-0.0207189	-0.0830334	0.166331	0.23541	0.701499	0.481207	-1.11148	-0.888263	-1.66733	-1.59943	1.39128	0.634188	-0.0956892	1.22118	-0.168102	0.492925	0.584121
5.03_601.5192m/z	0.825747	0.0149362	0.3579	-0.185202	-1.09506	0.83706	-0.274731	0.306437	-0.0312482	0.674403	-0.243843	1.27773	1.65926	0.259692	2.4417	1.23738	1.33589	0.486892	1.57396	1.578	1.16846	1.23883	1.62008	-1.02386	-0.679767	-0.597858	-2.56519	-0.0538571	-2.46899	-0.595232	0.317928	0.427761	-0.118766	-0.742928	0.364058	-0.668517	-0.303396	0.136105	-1.26014	-0.338098	-1.10818	-1.13961	0.675209	-0.391775	-0.507478	1.61931	-0.530319	0.479439	0.110877
5.04_878.5757m/z	0.482234	-0.24901	0.262566	0.0712471	-0.767126	0.706811	-0.0574174	0.536721	-0.40214	0.792651	-0.215745	1.29342	1.26234	0.545421	2.14202	0.919744	0.98333	0.41894	1.59672	1.8384	0.999842	0.883757	1.49541	-0.580734	-0.500547	-0.940947	-2.46934	0.222172	-2.52734	-0.608963	0.094181	0.551848	0.311758	-0.884522	0.17543	-0.629408	-0.504943	0.367081	-1.05098	-0.282541	-1.50477	-1.14029	0.961228	-0.112486	-0.674126	1.99379	0.0466124	0.809526	0.629518
5.31_410.7619m/z	-0.392444	0.128353	0.42165	0.539939	0.495408	0.969507	0.797525	0.571631	0.430488	0.917598	-0.576999	0.776224	1.65396	0.848006	0.839252	0.0979096	0.829299	0.759307	1.07935	1.3342	1.36356	1.00852	1.28265	-2.14897	-0.775672	-0.724334	-3.13595	-0.175726	-1.28108	-1.32817	-0.428074	0.188488	-0.130724	-0.192844	0.509361	0.663434	0.702082	0.343437	-1.06712	-0.417105	-1.93885	-1.26612	0.91706	0.732077	0.053427	1.25712	0.105398	0.521585	0.475678
6.46_804.0613m/z	0.0562109	0.240499	0.373161	0.27053	0.129574	0.462547	0.718759	0.833595	0.308122	0.922559	0.316631	0.801508	1.06236	1.27959	2.34614	0.166469	0.599163	0.57852	1.25593	1.21263	1.21728	1.34161	1.41362	-1.77422	-1.27194	-0.611303	-1.798	-0.283747	-1.47802	-1.0494	-1.4406	0.358526	-0.321461	-1.30342	-0.145218	-0.893623	0.903445	0.157035	-0.0647545	-0.78911	-2.20222	-0.704199	1.29686	0.653865	-0.183992	1.89405	0.496977	0.450351	-0.453493
6.47_785.3946m/z	-0.0708679	0.477019	-0.327735	-0.280077	-1.36882	0.841047	-0.0208238	0.873939	-0.397316	1.73916	0.86645	0.115064	2.02572	0.307738	2.61673	-0.559062	0.922895	-0.330973	0.990356	1.11472	0.0929368	1.82792	1.15443	-0.544073	-0.993271	-0.408984	-1.45906	-0.876022	-0.904296	-0.539719	0.218161	-0.0415146	-0.722165	0.157866	-1.2989	-0.601253	0.864686	0.248288	-1.69365	0.188725	-2.17054	-1.26725	1.88719	0.765369	1.10144	-0.193176	0.984027	-0.424443	0.151446
6.49_786.4543m/z	0.0175728	0.176055	0.522593	-0.335015	-0.767515	0.390795	0.903144	0.428146	1.1061	1.43547	-1.40403	1.76048	0.654005	0.949273	1.62849	0.577858	0.567771	1.22255	1.2446	0.594473	-0.287145	0.777149	1.26577	-0.894355	-0.412956	-2.22567	-0.879532	-0.0790985	-0.569881	0.694561	0.187322	1.14156	-1.85313	0.365795	-0.875689	-1.10248	0.286477	0.538816	-0.122975	0.888389	-0.99721	0.0586746	-0.033522	0.63429	-0.60332	1.16455	-0.438317	-0.277361	-0.0377567
10.34_736.6521m/z	-2.02913	0.37922	-0.372294	0.806003	-0.057344	0.417556	0.0276736	1.37827	0.969535	1.63058	-0.0817487	1.31326	0.67594	-0.604944	-0.19375	-0.509174	-0.478813	-0.257525	1.47623	-0.524749	0.60009	0.867157	-0.374536	-2.28923	-0.0294723	-0.45107	-0.323547	1.72403	0.649041	0.952622	-0.417861	0.394317	1.6344	0.478731	-1.70855	-0.736548	0.595772	1.16253	0.477665	0.326	0.250256	1.15055	-1.13606	1.17509	0.426698	0.677433	-0.268253	-0.440859	-0.266901
7.75_631.5667m/z	-0.673212	0.0160206	0.964056	0.98528	-0.510868	-0.45263	-0.752744	0.843374	-2.02091	0.676314	-0.479599	0.902877	1.41037	-0.673865	-0.0674517	-0.507311	0.932677	0.728769	0.776088	-0.241875	0.892128	1.96222	0.975052	-0.216369	-1.18985	-1.0751	0.998384	0.378664	0.443532	-0.0846958	0.798578	0.588409	-0.19934	0.32776	-0.994821	1.32159	0.878962	1.07648	-2.53755	1.42568	-1.38428	-0.85452	-1.31432	0.103816	-1.61337	1.23837	0.266843	-0.659774	1.00653
7.77_854.6286m/z	-1.92924	-0.0462551	-0.221738	0.590188	-0.628479	-0.65512	-0.845428	2.00453	1.6447	0.716889	1.35234	-0.118016	-0.331449	-0.430719	0.918484	-0.70341	0.358557	1.52076	1.00219	-0.421883	0.266725	0.951317	0.731064	-0.728155	-0.587438	-1.94936	0.834579	-1.20225	-0.396959	-1.0035	-1.01172	0.970546	-0.243693	-0.635163	-0.114236	0.723786	0.695496	-0.206543	-1.31058	1.58696	-0.475084	-0.193014	-1.62593	-0.27953	-1.78563	1.42526	0.758416	0.967951	0.741252
0.41_1124.8567m/z	-1.00975	-1.79706	0.280246	0.88267	0.625569	0.770772	-1.52076	-0.176632	0.253504	0.851478	0.252407	-0.00455064	0.958108	0.262628	0.356357	1.30232	0.0893842	0.285325	-0.161645	0.357248	0.493243	-0.0286883	-0.111686	-0.234768	0.430101	0.868715	0.155305	0.197487	-0.0174457	0.432444	1.13905	-0.395751	0.754734	0.777739	0.243678	0.0779702	-0.174471	-1.20347	-0.0104562	0.0488064	0.950851	-0.318709	-2.26719	0.427021	0.351461	0.428766	0.570304	0.240042	0.881727
7.96_746.5415m/z	0.666204	0.422721	0.832697	0.582117	0.35521	-0.135594	-0.416103	-0.061956	0.783234	1.06798	-0.171437	0.231086	-0.740555	-0.0548829	-0.562579	0.746142	0.079966	-0.54908	-0.373043	0.503065	-0.182203	1.13529	0.490756	1.49727	-0.724298	-0.190943	-0.265727	-0.836591	-0.329151	0.639595	2.03585	0.353906	0.301379	0.780466	1.10736	1.1461	0.387007	-0.126007	-0.301312	-0.156868	-0.452841	0.249113	-1.10443	-0.480673	-1.16034	0.10457	0.603419	-0.187211	-0.278704
3.03_543.8958m/z	1.48058	-0.726884	-0.00578537	-0.848072	-1.21228	-0.0774279	-1.4784	-0.555331	0.314882	-0.735146	-1.43668	-0.0735304	1.21191	1.30538	1.03384	1.43107	-0.0546562	-1.31541	0.744532	1.71457	0.152329	-0.226807	-0.768426	-0.112194	0.076272	0.25859	-0.424324	-0.877513	-0.654304	0.159339	1.659	-0.563601	0.341094	1.73665	1.26633	-0.150306	-1.49212	0.804184	-0.899158	-0.744515	0.377321	0.216564	1.17637	-2.51704	-0.0709899	0.69063	1.73026	-0.964749	0.736716
7.93_745.0827m/z	1.33465	-0.778719	0.609784	0.295789	-0.398423	-1.14692	-0.130434	-0.453966	-0.800596	0.0803983	1.05728	0.0649452	-0.122126	1.22724	-0.287158	1.75103	-0.256	-0.165748	1.22112	2.99294	0.00550907	0.117695	-1.21156	0.39117	0.357071	-0.342295	-0.969741	0.418684	-2.00747	-2.76817	1.19141	-0.312465	-0.698642	0.0442924	-0.662305	-0.307615	0.825635	0.716595	0.0974533	-0.302568	0.285339	-0.463434	0.19747	-1.02277	0.506269	0.678308	0.145803	1.04267	0.881533
9.84_519.4397m/z	0.125708	2.93029	1.82688	1.77898	-0.474845	-0.698891	-0.663215	-0.900933	0.0252941	-0.537364	-0.891057	-0.66879	-0.660822	0.679527	-0.318143	1.33727	0.231739	-0.363915	-0.793573	-0.540855	0.362228	0.630508	-0.510134	0.514751	-0.463519	-0.612978	-0.645171	-0.674785	-0.962491	-0.583266	-0.413904	3.61843	1.55983	0.957873	0.194263	0.0348625	-0.726153	2.95013	0.45611	-0.666717	-0.562537	-0.604187	-0.868599	-0.63268	-0.980711	0.767541	-0.28451	-0.276616	0.762443
3.82_702.5082m/z	0.299712	3.00433	2.21822	2.00096	-0.410326	-0.846637	-0.474496	-0.864579	0.679922	-0.288025	-0.951249	-0.378358	0.00385844	0.404515	-0.582859	1.50659	0.102382	-0.218385	-0.567505	0.114622	1.39104	-0.217648	-0.651106	-0.0277996	0.0492747	-0.0303069	-0.487749	-0.456378	-1.32253	-0.843336	-1.01627	1.93358	1.17501	1.0752	-0.149218	-0.379457	-0.486806	3.1997	1.65182	-0.648398	-0.695564	-0.778987	-0.389061	-0.738608	-0.470715	-0.182568	-0.0993062	-0.623934	0.871916
3.50_650.4739m/z	0.699244	3.01769	2.51021	2.23228	-0.101691	-0.816552	-0.41221	0.156269	0.754423	-0.626054	-0.906584	-1.11894	-0.0181512	0.515746	-0.826808	1.32312	0.0785498	-0.0205235	-0.00691534	-0.0901862	1.37746	-0.273553	-0.950964	0.00947194	0.424098	0.111903	-0.345005	-0.739567	-0.713267	-0.962089	-0.423404	1.81905	1.50454	0.540361	-0.208275	-0.381617	-0.368011	2.44839	1.40307	-0.69016	-0.934246	-0.612361	-0.748658	-0.380174	-0.980145	-0.594382	0.0639953	-0.667894	1.11675
4.49_678.5007m/z	1.05678	2.34219	2.63305	2.52523	-0.00954692	-0.991743	-0.361296	-0.0321411	0.600079	-0.55578	-0.916631	-0.797373	-0.20303	0.313128	-0.893133	0.575859	-0.011471	0.0624158	-0.0281226	-0.169981	1.73287	-0.359414	-1.01554	0.158172	0.462779	0.0160072	-0.143036	-0.736413	-1.04674	-0.832224	-0.439026	1.76888	1.66739	0.820188	-0.0685196	-0.0741347	-0.181754	2.49025	1.67606	-0.859494	-0.979455	-0.611325	-0.993601	-0.81324	-0.975973	-0.534924	-0.184708	-0.624591	1.10673
5.08_692.5191m/z	1.28976	2.37935	0.932115	1.41743	0.175694	-0.920891	-0.0375281	1.02892	-0.392944	-0.260138	-1.25427	-0.913337	0.00925183	0.699197	-0.325579	1.16104	-0.103951	-0.174097	-0.05925	0.148949	2.57187	0.352925	-1.13994	-0.494864	1.96018	0.762173	0.371072	-0.563736	-0.320786	-0.197465	-0.67599	0.846539	1.97502	0.614453	-0.420779	0.243462	-0.273859	0.382459	1.14761	-0.940672	-1.42257	-0.734194	-1.38561	-0.240684	-1.16286	-0.813237	0.413544	-0.217598	1.92139
6.73_692.5594m/z	1.2309	2.1635	-1.03778	1.27222	-0.363537	-0.655309	0.303791	1.29288	2.57318	0.311736	-1.08898	0.0103721	1.23829	0.454832	-0.52572	0.967343	0.603925	0.438958	1.3262	0.91719	1.31866	-0.426012	-1.32759	-0.936761	1.74273	0.721327	-1.05517	-1.05098	-0.230453	-1.48796	-0.35617	-0.360076	0.0399982	-0.627891	-1.71421	0.422552	0.947676	0.703375	0.731124	-0.0985072	-1.91964	-0.472981	-0.362813	0.188518	-0.488887	-1.04511	1.54819	-0.70512	0.803122
0.58_896.7969m/z	1.28098	0.671899	1.66887	-0.166585	0.280552	-0.209084	-1.73588	-0.255211	0.948124	0.950604	0.411636	-0.341757	0.505835	-0.10091	0.261409	-0.0775563	1.27807	0.244612	0.235711	0.863445	1.82354	0.575607	-0.534415	-0.6378	1.19757	0.500823	2.02696	-0.471123	0.573798	-1.53261	0.414788	-0.367011	0.260934	0.223936	0.416325	-0.45895	-1.9908	-0.342032	-1.72717	-2.31195	1.33032	-0.8397	0.779056	0.221948	-1.56524	-1.60004	-0.291749	-0.195822	-2.59076
0.56_160.1330m/z	-0.0198783	1.12062	0.0904273	1.02011	-0.499297	0.0777047	1.35379	0.530697	-0.421043	0.148898	0.308254	-0.400715	0.0592687	0.221102	-0.414121	0.813196	0.787774	-0.274951	1.42455	1.10153	0.97468	1.06317	0.320006	-0.625976	1.04998	-2.06467	-0.53084	0.997452	-2.43659	-2.49168	1.2815	-0.215915	0.67295	1.06403	-0.716043	1.42139	-1.03773	0.987727	-1.41692	0.804567	0.533509	0.371567	-2.11931	0.0229852	1.00568	-2.105	-0.136851	-0.78056	-0.515715
1.07_520.5320m/z	-0.140926	-0.157115	-0.935044	-0.1552	0.762728	-0.187188	0.713397	0.1598	1.53218	-0.921585	-0.0351859	-1.74934	2.68381	1.49648	-0.126655	0.132917	0.564181	-0.474627	-1.53432	-0.432933	1.79349	1.24488	1.0993	-0.808951	-0.408795	0.887385	0.25407	-0.217848	-2.52476	-1.76162	1.51255	-0.0815434	0.612259	-0.471721	0.133736	0.346711	-0.645262	0.144904	-2.12762	0.522425	0.248373	0.959723	1.17407	-0.376005	0.347904	0.257395	0.378569	-0.0223586	0.416571
0.59_1295.3677m/z	-0.700581	-0.0784043	-0.621979	0.39175	0.143949	-0.248067	-0.974682	1.31034	0.546491	0.249396	0.488307	0.961481	0.273069	0.856382	-1.45905	0.317813	-0.159383	0.690994	1.11499	-0.420212	-1.29822	-0.27456	0.392317	0.855983	1.18352	-1.04001	0.183374	0.144186	0.858328	0.00786235	0.363825	1.21881	0.787871	0.779096	-0.00782216	0.182603	-1.05421	0.66135	0.732518	-1.02834	0.659067	-0.612917	-0.129014	-2.65721	1.08455	1.01239	0.838995	-0.0491435	0.635394
8.27_1328.8853m/z	-1.08195	0.953623	0.156912	0.199268	0.0326338	0.0306455	-0.626963	1.10983	1.29036	1.50048	0.741244	0.58933	0.848023	1.39781	-2.86116	-0.266015	0.257641	-0.999353	0.604527	2.16759	-0.292183	-1.021	0.933643	-0.748881	0.527498	-1.30404	-0.95453	-0.0935474	-1.39819	0.250104	-0.387942	0.0912101	-0.0477805	0.0100559	0.219194	-2.00674	-0.265493	0.803804	-0.173183	1.06086	-1.82798	1.21447	0.127463	0.853834	0.96823	0.561383	1.18137	-0.699228	1.49015
10.80_383.3654m/z	0.732458	-0.0536587	-0.00527332	1.0301	0.467009	0.871391	-0.255755	1.04063	0.728236	-0.445387	1.00812	-0.305359	1.0001	1.11849	0.799209	0.927016	1.38944	-0.5946	0.965452	1.775	-0.92975	-0.503014	-0.150903	-2.20313	0.107291	-1.22398	0.708408	-0.433761	0.688442	-0.558523	-0.606932	-1.64683	1.03593	-0.817054	1.232	-2.10649	0.28644	0.0362807	0.0296387	-0.870443	0.0437182	0.277866	-0.792234	-0.51051	0.783329	0.801542	1.74388	-0.907865	-1.19763
11.10_397.3814m/z	0.0781485	-0.333736	0.598978	2.31709	-0.54487	0.141821	-0.884303	0.217741	0.175348	0.917547	0.246557	0.147019	2.60608	1.61467	0.702951	-0.500633	1.34972	-0.556578	1.65881	1.14978	-0.285213	-1.06796	0.455408	-1.28071	-1.42057	-1.47096	0.0478666	-0.419954	-0.407369	-0.825292	-0.145023	0.157306	1.14747	-0.910285	0.84264	-0.659024	1.04551	2.36641	0.0124719	-0.252151	-0.34311	-0.227439	-0.48939	-0.516416	0.408651	0.817788	1.33052	-1.32392	-0.0946473
0.61_1482.4295m/z	0.537634	-1.38174	0.664353	1.07884	0.860434	-0.593044	-0.732978	0.141985	-0.206591	0.0945615	-0.233191	-0.0297774	0.395697	0.537716	0.190244	1.91755	-0.894741	0.717202	-0.525184	-0.0377186	0.944506	-0.651709	-0.504597	0.577029	1.07923	-0.0249041	-0.877175	-2.26954	0.0994398	1.09435	0.0996756	1.03589	-1.67455	1.23957	0.562341	-0.108471	-1.33351	-1.77896	-2.70281	-0.338188	0.493661	0.393122	0.84043	-0.425077	-1.54074	2.24316	0.419306	1.10816	1.02751
7.77_818.0776m/z	-0.0873896	-1.08034	-0.312106	-0.394464	-0.801499	0.854164	1.31959	0.894393	-0.678638	-2.23864	-0.179262	0.449465	0.505855	0.747977	1.16356	1.45605	0.462666	1.50207	0.563309	2.02489	0.388698	0.328421	1.19884	-1.08839	0.0963467	-0.391949	-0.777608	-1.10401	0.286566	-1.30209	-1.20931	-0.171918	-0.0602564	-0.415079	1.35366	0.256256	-3.54948	0.523544	0.27275	0.939498	1.23706	0.648539	-0.241415	-1.11094	-0.703891	-0.0878907	0.476884	-1.31401	1.61569
5.83_858.6018m/z	1.70594	0.0300336	-0.590021	-1.18179	-1.2875	0.165576	1.24164	0.262989	-0.423323	-0.885672	1.45133	0.842801	0.0192554	0.86199	1.09756	1.29397	0.452661	0.860349	2.72543	0.836879	1.37473	0.547343	0.761087	-0.765473	0.934138	-0.859756	-1.0117	-1.4784	-0.137466	-0.584648	-0.430496	-0.418365	0.613862	2.06755	0.684289	-0.500058	-0.576777	-1.6562	-1.29671	-1.16766	0.025403	-0.161484	-0.858414	-1.1373	-0.154022	-0.130465	0.110036	-0.354224	-0.302099
7.25_629.5499m/z	1.71148	0.149373	-0.918174	-1.01697	-1.06543	-0.838512	-0.00410845	1.0925	-1.57808	-0.842941	-0.408423	-0.425562	1.68113	0.381908	1.30667	0.945902	-0.0310713	0.369699	1.61714	1.9734	1.19867	1.42044	-0.168279	0.183077	0.564618	-1.01208	0.88341	-1.33029	-0.22155	-0.477833	0.862584	0.799235	0.0183293	0.613615	0.366915	0.426238	0.833228	-1.41902	-1.50504	-0.109331	-0.0413261	-0.615666	-1.73128	-0.160836	0.259648	0.105347	1.07219	-0.18301	1.47639
0.92_518.3249m/z	1.60465	-0.353292	0.907143	0.164101	0.167958	0.106545	0.0257855	-1.02773	0.597345	-0.225738	-0.0994585	0.104606	1.03377	2.14213	1.22418	0.0576064	0.208734	-0.0728319	-0.823226	0.315443	1.62162	0.502469	0.80242	2.99303	-1.48936	-1.60214	-0.976423	-1.24217	-1.78017	-0.901128	0.820995	1.42194	0.474605	1.00036	1.15955	-1.24182	-0.293333	0.419807	0.360204	-1.63327	-1.12068	-0.550302	-0.0663366	-0.0912163	-0.348893	0.363141	-0.216245	-1.01598	0.0354023
4.47_780.5544m/z	-0.579214	-0.630804	-0.309128	-0.265155	-0.136578	0.775012	-0.207205	-0.433476	0.335158	0.880358	-0.219368	0.584074	1.99121	0.860705	1.89624	1.15427	1.39947	0.107151	-0.212299	0.968983	0.679098	0.940776	1.45563	2.6119	-1.77609	-0.880591	-1.37133	-0.65287	-1.61796	-0.62265	-0.82957	0.420641	0.28987	0.305256	0.331466	-0.868249	-0.216923	0.688291	-1.08775	-0.850247	-0.603195	-1.89573	0.894455	0.549936	0.403106	2.12564	0.342474	-0.518166	-0.229599
1.03_524.2534n	2.14593	0.018087	-0.535134	-0.0508128	-0.334271	0.0805784	0.707865	-0.724909	-0.197874	-0.232892	0.75595	1.11634	0.553251	2.13703	-0.249528	0.997243	-0.807148	-0.488403	0.989341	1.73251	0.714582	0.845436	0.748844	-0.135676	-0.659867	-2.61059	-1.1887	-2.0094	-1.26196	-0.275188	-0.249383	0.844776	0.664257	0.650448	1.42613	-1.44082	-0.429194	-1.10279	0.49232	-1.21285	-0.771633	0.674696	0.416158	0.684873	-0.0130532	-1.02774	0.819193	-1.27783	0.133254
1.06_570.3555m/z	1.21794	-0.232644	-1.03961	-0.970342	-0.00650306	-0.879718	0.814809	-0.25721	0.020641	-1.59862	1.76301	1.31371	0.693279	2.10934	1.16204	0.961218	-0.693546	-0.0560844	0.225616	1.05621	1.22818	1.08595	0.0445954	1.87707	-0.463279	-1.95272	-0.170454	-1.29239	-1.32154	-0.965952	0.555876	0.67529	-0.438102	1.56738	1.0934	-0.93705	-1.0502	-0.997942	0.0262205	-1.17802	0.0999626	0.902742	-1.32146	-0.532259	-0.196587	-0.959389	0.498499	-0.307991	-1.07915
1.07_578.3866m/z	0.360002	0.742209	0.0596572	-0.372604	-0.116539	-0.204794	1.76633	-0.313734	1.38835	0.226508	0.141212	0.789189	1.5976	1.21647	-0.0858571	-0.283168	-1.13289	0.892252	1.21852	1.14216	0.183442	0.677624	1.76343	0.0258101	-1.98797	-1.1323	-2.39071	-1.99996	-1.82373	-1.34187	-0.170754	1.69953	0.308929	0.328598	0.012299	-0.250191	-0.207109	0.879999	0.710037	-0.405355	-0.343038	1.54012	-0.514468	-0.164965	0.175126	0.0323001	0.112229	-0.234589	-0.673792
1.24_1010.6463m/z	3.12704	-0.570457	-0.739735	0.611574	0.503828	-0.556917	0.778898	-0.0440182	-0.309368	-0.0461326	0.225681	0.861619	-0.163051	1.15441	0.488177	0.250521	0.39255	0.82062	0.973613	1.20099	0.866323	0.274913	0.551844	0.860083	-1.23889	-2.01403	-2.30283	-0.41421	-1.65033	-0.922092	0.382548	1.1769	0.0899395	0.166045	1.14733	-0.136624	0.494302	-1.54743	0.414375	0.197069	-2.30053	0.614122	-0.179596	0.0818416	0.181506	0.401642	0.825857	0.368866	0.144242
1.29_1005.6307n	0.516081	-0.968483	-0.0337256	0.414785	0.335592	-0.175967	0.550645	0.439882	0.349348	-0.199699	0.677452	2.27614	-0.183119	1.64911	1.73165	-1.26036	0.0350926	1.36625	0.933669	-0.136338	0.781673	0.277797	1.3593	1.06674	-1.23418	-1.29882	-2.09087	-0.744018	-0.442124	-1.29232	-1.05198	1.34968	0.0598461	0.196605	0.0808451	0.252372	0.22252	-0.245771	0.792967	0.235275	-1.45791	2.1449	-0.37949	0.383684	0.377543	-0.24322	0.289185	0.152005	0.0468062
1.31_522.5065m/z	1.85182	0.117522	1.04545	-0.609145	0.240107	0.407259	0.972311	-1.16194	1.24726	0.53369	0.637325	1.23496	0.649035	1.42636	0.958221	0.0525646	0.19674	0.328329	1.34317	0.257511	0.697891	1.00328	1.34663	-1.37506	-2.01423	0.134282	-0.631932	-1.51434	-0.925419	-1.59805	0.707339	0.737941	-0.112096	0.740015	0.41056	-1.52621	0.0276477	-0.253925	1.44891	-1.33454	-0.317888	-0.762169	-2.00734	0.541963	-2.14177	-0.452088	0.289354	-0.55641	0.608706
1.06_539.8154m/z	-0.180062	0.758258	0.101077	-0.0690609	0.0473623	0.514731	1.18333	-0.189404	1.4345	0.372477	-0.115768	0.974591	1.74375	1.69128	0.597628	-1.0915	-1.05066	-0.0943864	1.20296	1.18685	1.00849	0.996773	1.11053	-2.02016	0.484388	0.565182	-2.32381	-1.35867	-2.24058	-1.32027	-0.0416811	0.951831	-1.43437	1.08308	0.845826	-1.47345	-0.629965	-0.103154	0.314806	-1.34987	-0.247852	-0.100733	0.638261	0.827321	-0.832204	0.727341	0.474118	-0.796815	-0.282862
1.07_104.1064m/z	-0.0852255	0.716014	-0.0179466	0.57483	-0.477365	0.394025	0.702061	0.425676	1.16529	0.265247	0.59693	1.16177	1.65385	1.75701	0.569282	0.393538	-1.13756	0.00148479	1.08268	1.28782	0.882828	1.1337	1.13637	-3.16425	-1.87375	-1.36933	-1.23663	-1.87882	-1.28509	-1.05404	0.300701	1.22088	0.097041	0.914351	0.51496	-1.94693	-0.144817	-0.604397	0.100941	0.116965	-1.08519	-0.101346	0.40545	0.750091	0.598573	-0.259807	0.356335	-0.308586	-0.0318502
1.07_279.6468m/z	-0.210832	0.32686	0.297969	0.380877	-0.0315757	0.511698	1.08073	-0.137937	1.2785	0.700354	0.458991	1.07713	1.96524	2.04417	0.340026	0.47872	-1.10662	0.0421567	1.25117	1.01864	1.3121	1.28968	1.08843	-2.59294	-0.731926	-2.72565	-1.77416	-1.45486	0.112316	-1.34493	-0.0440589	0.673796	-0.268294	0.726423	0.478551	-1.1919	-0.101348	-0.371123	0.443779	-0.903364	-1.36341	-0.186766	0.389151	0.602334	0.135952	0.508119	0.677414	0.117518	-0.179631
1.07_539.3138m/z	0.0935475	0.542956	-0.340781	-0.554053	-0.430938	0.176538	1.44908	-0.401809	1.36347	0.242872	0.287921	1.30464	2.52434	2.69868	0.150767	0.525627	-0.252716	0.159226	1.34485	1.48975	1.19208	0.656403	1.63879	-0.788186	-1.49616	-1.5846	-2.04412	-1.32047	-1.56446	-1.57431	0.404107	1.21391	-0.742182	0.401723	0.387477	-1.23231	-0.538528	-0.27729	0.0797669	-1.08259	-1.0801	0.230957	0.776048	0.116836	0.300357	0.00334008	0.403779	-0.230273	-0.774023
1.06_184.0730m/z	0.658158	0.524022	0.175626	-0.446156	-0.12209	0.381229	1.39753	-0.629596	1.53743	-0.111682	0.518491	0.848297	2.06418	2.46103	0.520579	0.459466	-0.335196	0.29874	0.857593	1.1806	1.66321	1.52581	1.55319	-1.65499	-1.106	-1.72306	-2.02209	-2.16647	-1.55019	-0.891865	0.232857	0.944549	-0.319375	0.951109	0.455905	-1.40968	-0.667347	-0.800331	0.151195	-1.21076	-0.695176	0.413739	0.263815	0.511687	-0.346083	-0.346018	0.134271	-0.07989	-0.561294
1.06_1038.6670n	0.435982	0.673582	0.0378272	0.0554523	0.111861	0.532174	0.998878	-0.000911415	1.18803	0.500942	0.526142	1.28787	1.63892	1.90814	0.590952	0.632034	-0.419549	0.359613	1.24152	1.37479	1.15468	1.18181	1.11305	-1.31537	-1.14522	-2.14093	-1.77219	-1.7568	-1.95456	-1.53117	-0.0986222	0.992943	-0.320639	0.508938	0.727854	-1.84926	-0.770308	-0.423356	0.504175	-1.35734	-1.37947	-0.101151	0.733538	0.684209	0.161097	0.406992	0.614883	0.189319	-0.613987
1.06_483.2488m/z	0.246775	0.612941	-0.0398721	-0.0853512	-0.140873	0.461584	1.12453	-0.229783	1.25398	0.399179	0.43265	1.42876	1.82869	2.20539	0.419374	0.382786	-0.700322	0.25996	1.26145	1.54709	1.21727	1.26061	1.31935	-1.03415	-1.45107	-2.20131	-2.07499	-1.69782	-1.95131	-1.32476	0.00446265	1.04063	-0.362781	0.437918	0.700324	-1.46926	-0.70413	-0.342449	0.411032	-0.929678	-0.975827	0.0421397	0.7704	0.579577	0.087881	0.320383	0.64428	0.0492101	-0.360646
1.06_519.3335n	0.264426	0.560781	-0.0406509	-0.065605	-0.137797	0.518675	1.05914	-0.0768357	1.23975	0.372282	0.407113	1.39876	1.79093	2.17509	0.443441	0.524867	-0.827209	0.257	1.33049	1.51225	1.2591	0.989475	1.30285	-1.17475	-1.45657	-2.13156	-2.23917	-1.47015	-2.01774	-1.32085	0.0410903	1.0933	-0.375949	0.636606	0.655174	-1.40703	-0.863398	-0.381737	0.352634	-1.03977	-0.803631	-0.0691748	0.791268	0.635038	0.126646	0.335119	0.624967	0.0957308	-0.439026
1.06_714.3691m/z	0.373437	0.669377	0.0339778	-0.172265	-0.106606	0.520051	1.17523	-0.147209	1.4496	0.154985	0.34322	1.22873	2.00745	2.23321	0.470685	0.503499	-0.58302	0.236296	1.15625	1.494	1.37715	1.30489	1.42661	-1.47884	-1.57529	-1.92562	-1.78106	-1.8273	-1.8714	-1.3711	-0.0546103	0.997693	-0.618733	0.615182	0.610074	-1.62497	-0.532803	-0.40925	0.156743	-1.02494	-0.609705	-0.190529	0.568029	0.574047	-0.177258	0.151336	0.594166	-0.0399295	-0.30061
1.07_519.2986n	-0.0537867	0.663531	0.0595796	-0.0434726	-0.0721232	0.514692	1.24114	-0.256226	1.55973	0.28907	0.425309	1.21326	2.20146	2.44755	0.529377	0.371353	-0.585706	0.236138	1.14988	1.36376	1.44653	1.40681	1.54118	-1.37004	-1.2672	-1.90552	-2.09745	-1.57327	-1.77646	-1.17739	-0.110854	0.985062	-0.49001	0.555291	0.434548	-1.44305	-0.556523	-0.513811	0.100916	-1.08325	-0.891952	-0.0700276	0.497896	0.469673	-0.0773544	0.134593	0.37656	0.0511904	-0.471135
3.26_606.4507m/z	2.42414	0.865423	0.450339	0.485721	-1.21208	-0.327673	-0.327857	-0.546192	1.6744	-0.774267	0.172924	0.566635	1.00704	0.382943	2.28189	0.625631	0.943995	0.998588	-0.297315	1.10397	1.1406	1.15454	1.35604	-0.0669707	-0.448339	-1.5663	-2.06631	-2.29782	-0.451375	-0.655582	1.04054	0.489378	-0.530595	0.12693	-0.0135377	-1.55075	0.888071	-1.19033	-0.887843	-1.32351	-0.182081	-0.0225836	-0.131593	-0.506161	-1.15703	-0.267601	0.762603	0.048701	0.0519465
2.06_538.3878m/z	2.70492	1.07223	0.213678	-1.10552	-0.188388	-0.151973	0.55551	0.743945	-0.447106	-0.298711	0.00869199	0.806933	0.918919	0.574619	1.57493	1.59818	1.2693	0.486664	1.2886	1.91204	1.19843	1.55948	0.768495	-0.415758	-0.372182	-1.21707	-2.02729	-1.05446	-0.984469	-2.01794	0.0113311	1.20018	-0.100324	0.211607	0.0517785	-0.690303	0.109148	-1.4308	-1.592	-0.463647	-0.556059	-0.738521	-0.914475	-0.545448	-0.825131	0.172282	0.884892	0.349494	-0.652738
1.78_550.3866m/z	2.39439	0.249199	0.0995539	-0.804732	-0.170615	0.142273	0.375021	0.180823	0.740709	-0.686755	-0.523329	1.06185	1.67443	0.434519	2.45357	0.969072	0.776641	0.896158	1.25871	1.65024	0.774509	1.71822	1.7456	-1.50701	-0.89475	-1.23581	-2.27031	-1.26986	-1.36462	-0.186797	1.34894	0.880266	-0.940242	-0.0083141	0.294974	-1.52544	-0.0652457	-1.09895	-0.855385	-0.739911	-0.699128	0.366152	-0.572357	-0.599417	-1.01025	0.0458925	0.156998	-0.403953	-0.663814
2.47_513.4368n	2.04526	0.230626	0.596403	0.28296	-0.146772	-0.226484	0.545812	0.256279	0.516656	0.176517	-0.241971	0.181037	0.819472	0.861029	2.68627	0.958234	0.810815	1.16476	0.898935	1.48395	0.393954	1.12626	1.63742	-0.519879	-0.996494	-1.65619	-2.78552	-1.3921	-1.60362	-1.4199	1.31976	0.912777	0.226986	-0.00526183	0.780195	-1.87397	0.390822	-0.117955	-0.964319	-0.886172	-0.70286	0.028531	-0.64427	-0.748199	-0.686585	0.590276	0.145638	-0.240856	-0.922402
1.38_480.3444m/z	2.34433	1.56049	0.47145	-1.59324	0.28374	0.749701	1.06661	-0.437712	0.446264	0.289906	-0.224363	1.00867	1.08961	0.871128	0.223598	0.320212	-0.26013	0.755026	1.27365	2.1837	0.860302	0.557666	1.44805	-1.63075	-1.28574	-1.52152	-2.18829	-1.40039	-1.59607	-1.17615	0.381875	0.778573	-0.584461	0.0364858	0.984178	-1.11529	-0.526925	-1.12784	-0.0241035	-0.8745	-0.61946	0.313383	-0.507599	-0.214209	-0.733564	-0.167128	0.283143	-0.243754	-0.148826
2.04_510.3925m/z	2.8328	2.08273	-0.193112	-0.620421	-0.102895	0.333766	0.797245	0.562346	1.13532	0.184008	-0.225456	0.231641	0.423924	0.803857	0.508117	1.30968	0.287373	0.793015	1.10051	1.22085	0.419904	0.916335	1.93014	-2.22101	-0.933609	-1.63428	-1.66102	-0.922075	-1.03821	-1.23802	0.937238	0.563793	-1.5192	-0.548505	-0.00159996	-0.472511	-0.248456	-0.878673	-1.37519	-0.245064	0.0778068	0.00276207	-0.988711	-0.405626	-0.463075	-0.175136	0.489953	-0.457129	-0.783207
1.45_482.3616m/z	3.15217	1.72983	0.329934	-0.545574	-0.520824	0.907482	1.2448	-0.228432	0.593174	0.390667	-0.167022	0.473541	0.544058	1.02832	0.204435	0.408811	-0.0170495	0.146945	1.33496	1.16576	0.958686	0.67602	1.76809	-2.28143	-1.28721	-1.67176	-2.07137	-0.623696	-1.4976	-0.601609	0.856055	0.67678	-1.18839	-0.0532216	0.216616	-0.554828	0.111757	-0.846237	-0.556571	-0.865908	-0.83432	-0.434327	-0.338116	-0.260378	-0.494942	-0.0749999	0.134696	-0.621756	-0.609321
1.51_508.3768m/z	3.57791	1.60296	0.22277	-1.3105	-0.331812	1.01817	0.575999	-0.292134	0.548905	-0.27084	-0.192604	0.835172	0.936043	0.239203	0.365543	0.607475	-0.114443	0.316102	1.2561	1.27705	0.765155	1.31134	1.86538	-2.30176	-0.907276	-1.18493	-1.77729	-0.474969	-1.12185	-0.266321	1.59133	0.770301	-1.27819	-1.191	0.00244648	-1.06464	0.168774	-1.12303	-0.440007	-1.00722	-0.735454	-0.135667	-0.299222	-0.476759	-0.494297	-0.213005	0.0881003	-0.357389	-0.489284
2.24_562.4214m/z	2.48798	2.74333	0.368318	0.0786363	-0.876975	0.404516	-0.724941	-0.117576	0.851706	0.663663	-0.254765	1.26494	0.128978	0.73022	1.04873	0.525703	1.15894	1.12161	0.094272	1.23378	0.269699	0.287869	1.32561	-2.36822	-0.550357	-0.775732	-1.55039	-1.5404	-0.996729	-1.13288	1.54644	0.013104	-0.656327	-1.29849	0.0291225	-1.45728	0.451179	-1.43573	-1.21657	-0.864525	0.869118	0.0321838	0.063783	-0.696765	-0.352842	-0.88597	0.276059	-0.07248	-0.408644
2.87_538.4241m/z	2.22289	2.39051	-0.057207	-0.639437	-0.468394	0.213144	-0.0400293	0.345314	1.23773	0.424217	-0.0730393	0.669458	0.227383	1.12177	1.34796	0.595142	-0.173367	1.09425	0.109417	1.0309	0.206297	-0.252353	1.86508	-1.77672	-0.604111	-1.92083	-2.26192	-0.324054	-1.00478	-0.929074	2.11005	0.838104	-1.386	-1.88413	-0.406151	-0.956124	0.719566	-0.398533	-1.07389	-0.122563	-0.485878	0.699987	-0.26423	-0.366016	0.489717	0.343658	0.611214	-0.324539	-0.748913
3.69_566.4552m/z	1.55194	2.47576	-0.177454	-0.523909	-0.0236559	0.115403	-0.10073	0.376521	2.22759	1.03355	-0.764896	-0.358025	-0.267068	0.728794	1.35963	1.58815	-0.0828782	0.886549	0.391879	1.14286	0.18565	0.0382332	1.79131	-1.63783	-0.651215	-1.48489	-1.50196	-1.27087	0.0820472	-0.157198	2.05097	0.878544	-1.55588	-1.02944	-0.53517	-0.743763	0.692496	-0.770654	-1.41738	-0.364673	-0.567572	0.515946	0.311411	-0.360425	0.183215	-0.2258	-0.482219	-1.29724	-0.887371
1.29_496.4057m/z	2.64299	1.53453	0.0925674	0.457086	-1.00319	-0.635666	0.0553313	0.951437	-0.429285	0.380528	-1.3662	1.24391	1.95125	0.29116	-0.561797	1.42026	0.45962	-1.53471	1.89868	0.479284	0.449681	0.415081	-0.182184	-0.103679	-1.14873	-1.4926	-1.19339	0.716361	-0.917416	-0.465651	0.317264	0.440554	0.569514	0.26462	-0.13288	-0.496906	-1.24239	0.257223	0.81356	-1.32806	-0.49383	-1.23555	-0.625945	0.928695	-0.5091	0.873806	0.9266	-0.783643	0.446944
1.52_536.3711m/z	2.03585	1.39086	-0.531568	-1.8448	0.0115906	0.783716	1.04208	0.932997	-0.20281	-0.282424	0.0845104	0.591975	1.42667	1.60909	0.916186	0.979572	-0.353728	0.362448	1.47188	1.45054	1.82332	2.68978	0.901942	-1.14877	-0.285745	0.0598646	-0.900151	-0.387891	-1.49077	-0.967299	-0.61858	1.03832	-0.644128	-0.70702	0.558425	-1.72079	-1.12411	-0.654595	-0.402827	-0.93396	-0.451122	-0.283559	-0.494934	0.371646	0.177238	-0.698131	0.398065	-0.720594	-0.521807
1.07_482.3247m/z	2.63349	1.067	-0.00300822	0.0724302	0.295972	0.208033	1.70094	0.271484	0.224606	0.0567956	-0.716842	0.389271	0.809306	2.01684	-0.0394217	0.773335	-0.148378	0.0856149	0.558053	1.0035	2.63245	1.79686	0.0788504	-0.884657	-0.124497	-0.308209	-1.41483	-1.43082	-0.940346	-1.1086	-0.923667	1.14855	0.967046	0.897212	-0.0605431	-0.344798	-1.44935	-1.81124	0.0434514	-1.22817	-1.59888	-0.0840993	-0.575576	0.646358	-0.491913	-0.750084	0.451869	0.0755706	0.943667
1.46_510.3564m/z	2.14478	1.37333	-0.412634	-0.825385	-0.0631045	0.197732	0.954696	1.66388	-0.210741	0.163501	-0.333051	0.296004	0.593714	0.698612	0.429773	1.26609	0.109027	0.0478728	1.27242	1.66279	1.53152	2.52266	0.165429	-1.00516	-0.326654	0.740458	-0.682995	-1.504	-1.31379	-1.47035	-0.967283	1.01968	0.0471462	0.762506	-0.27609	0.196927	-1.75736	-1.91372	-1.39834	-0.47049	-0.417363	-0.0564648	-1.41833	1.09381	-0.590297	-0.504768	0.461597	-0.310975	0.448887
1.60_718.3995m/z	3.03396	0.00595054	0.445583	-0.996874	-0.0885922	0.0268624	-0.357283	0.304245	-0.105241	-0.787165	0.422761	0.40699	0.889137	0.353814	0.201881	1.81727	1.09179	0.715105	0.381834	1.23634	-0.0264051	1.93523	0.706769	-0.267264	-1.85237	-1.57299	-1.40206	-0.790045	0.154903	-1.20238	1.46506	1.01698	0.0698773	0.660815	0.549845	0.477866	-1.01885	-0.677955	0.100521	-2.84312	0.017714	-0.0261287	-1.51416	-0.281053	-0.666352	-0.302779	-0.364403	0.228663	-1.25054
1.73_525.5609m/z	2.48828	0.809297	0.815533	0.535963	0.499699	0.214681	0.495144	-1.66364	-0.314603	-1.01033	0.366214	-0.226022	0.568178	1.09004	0.159148	1.61906	0.303678	0.0198834	-0.273993	1.79948	-0.150219	1.28099	-0.475121	0.632189	-0.639284	-1.99548	-0.72199	0.593625	-0.124866	-1.18276	0.581258	0.450199	-0.185476	1.23058	0.711948	-2.50247	0.0333786	0.913973	-1.12652	-1.45629	0.0627806	0.231899	-2.22314	-1.38223	-2.20619	0.0417697	0.293703	0.505061	-0.319667
1.24_515.8153m/z	2.47674	-0.106771	0.188792	0.128063	0.418986	0.752085	0.890559	-0.316234	0.188594	0.300088	0.141241	0.287981	0.46375	0.910523	0.0421731	0.351818	-0.0610944	0.5773	0.814119	1.01533	1.00559	1.15742	0.329586	-3.28571	-1.07376	-2.11564	-1.56442	-1.74421	-1.71123	-0.364189	0.258294	1.81143	0.482585	0.20608	1.46523	-0.782463	0.372704	-1.47184	0.199251	0.166482	0.135256	-1.13751	-0.127196	-0.138958	-0.972116	0.23603	0.665766	0.193478	0.509163
1.25_496.4440m/z	3.15183	0.493566	0.789221	-0.274031	-0.292545	-0.0217271	0.648518	0.498595	0.568811	-0.350857	-0.650256	0.161889	1.06633	-0.283257	-0.747722	0.515675	0.84355	0.493475	0.959904	0.758766	1.43619	1.99665	0.682985	0.350452	-1.80238	-2.88699	-1.55192	-1.17721	-0.998854	-0.262953	0.775737	1.15999	-0.109326	0.918798	0.903697	-1.04329	0.402918	-1.53379	-0.60336	-1.11636	-0.516679	-0.315422	-0.400298	-0.594601	-1.29698	-0.0118118	0.728278	-0.397695	-0.140872
1.31_453.2845n	3.05732	0.660808	1.60703	0.175691	0.667383	-0.971545	-0.0492424	-1.04509	0.515344	-0.400642	-0.306821	0.873957	0.975667	0.523762	-0.634459	0.452029	0.52594	0.333722	0.279831	0.573816	1.34439	1.10471	0.70277	0.476597	-1.02268	-2.57501	-1.51558	-1.7778	-1.47377	-0.736507	1.5425	1.63002	0.275944	0.394801	1.6189	-0.391202	-0.410238	-1.18656	-0.0612148	-0.295548	-0.266065	0.870334	-0.886549	-1.0123	-1.18762	-0.511562	0.698008	-0.481716	0.369813
1.82_482.3247m/z	3.01653	0.94696	1.2292	-0.285101	0.423197	-0.567534	-0.0234895	-0.683445	0.13021	-0.58207	-0.616616	0.685378	1.04915	0.563113	-0.142192	1.31489	0.680271	0.432542	0.758586	1.29397	1.01029	1.75038	0.75988	0.477463	-1.44048	-2.51683	-1.53752	-1.49855	-1.17084	-0.492972	1.59092	1.11549	0.209154	0.444738	1.3052	-0.190864	-0.241835	-1.20658	-0.237754	-0.559868	-0.0987449	0.458853	-1.50252	-0.910733	-1.02338	-0.352388	0.653684	-0.630866	-0.175755
1.25_496.5394m/z	4.43628	0.480863	0.787839	0.0719875	0.437974	-0.0521053	0.832352	-0.739941	-0.058117	-0.686167	-0.608847	-0.676376	1.2959	0.506205	-0.369385	0.513383	-0.47846	0.400385	0.165352	0.396789	1.99734	1.95704	0.51466	-0.403663	-1.56712	-1.39651	-1.71383	-0.420516	-1.634	-0.213416	0.371375	0.701875	-0.136497	0.375264	1.83769	-1.14074	-0.551433	-1.51346	-0.449739	-0.721557	-0.68917	-0.699927	-0.0392385	-0.100454	-0.997811	0.0382502	0.351247	-0.11106	-0.473554
1.24_1044.5977m/z	1.96297	0.499684	0.609111	0.30246	0.63244	0.44341	0.7591	-0.339408	0.362591	0.5806	-0.213756	-0.142889	0.987126	0.782429	-0.290187	0.869063	-0.265097	0.311535	1.06361	1.22093	0.923558	1.09771	0.879631	-0.495433	-2.46416	-3.73448	-2.06722	-0.538141	-1.62652	-1.49831	0.68459	0.946031	-0.0942731	0.257564	1.22528	-1.06995	0.21655	-1.8317	-0.125982	-1.55954	-0.445528	-1.27211	-0.554308	-0.0789552	-0.304082	0.239586	0.595389	0.69786	0.217938
1.24_779.9836n	2.53219	0.30879	0.108715	0.515542	0.11483	-0.023316	0.628532	0.0609385	0.153354	-0.0528949	-0.408322	0.777483	0.925613	0.871528	-0.0788076	0.641671	0.238325	0.484481	0.975478	1.31194	0.993762	0.875202	0.554705	0.0556329	-2.37978	-3.02337	-3.5229	-0.444733	-1.90756	-0.395027	0.727914	1.19279	0.282728	0.391234	1.07333	-0.790042	-0.147747	-1.11119	-0.263337	-0.882682	-1.13557	0.0561761	-0.536036	-0.288829	-0.767888	0.467104	0.49425	0.563116	0.206526
1.24_763.4809m/z	3.08554	0.229022	0.206456	0.268142	0.427982	0.106675	0.531911	-0.657664	0.0911484	0.259841	-0.519961	0.0987794	0.840997	0.997589	-0.125212	0.958673	0.221323	0.192633	0.711497	1.23657	1.5051	0.736035	0.843759	0.131841	-1.77573	-3.88659	-2.11496	-0.904886	-1.00419	-0.719886	0.068398	1.01534	0.314274	0.996217	1.22227	-1.05627	-0.0974908	-1.29812	-0.232776	-0.395104	-1.35325	-0.0113866	-1.24547	-0.224039	-0.875464	0.0398485	0.422222	0.513396	0.181567
1.24_690.3696m/z	2.35764	0.587604	0.649658	0.141459	0.371597	0.299111	0.703225	-0.541715	0.239886	0.126416	-0.499038	0.0155116	1.17242	1.11102	-0.0204621	0.637973	0.144239	0.578958	0.873042	1.30027	1.44696	0.965697	0.831065	-1.18075	-2.05222	-3.61023	-2.15753	-0.902186	-1.99331	-0.639575	0.597981	1.26134	0.137365	0.830104	1.27767	-1.00272	-0.261197	-1.1684	-0.212524	-0.655795	-0.370676	-0.255107	-1.04412	-0.386404	-0.996615	-0.013164	0.77511	0.285036	-0.0348654
1.24_495.3333n	3.3158	0.403236	0.68075	0.10463	0.525398	0.265061	0.783879	-0.466362	-0.0807036	-0.0770418	-0.479888	0.441862	1.00225	0.869153	-0.331107	0.503404	0.059128	0.577672	0.775297	1.2646	1.40457	1.14263	0.783436	-0.501749	-2.01147	-3.01236	-2.27148	-1.01878	-1.80727	-0.703244	0.583262	1.24093	-0.0219336	0.852801	1.51277	-0.853548	-0.339761	-1.25591	-0.485118	-0.499187	-0.66682	0.0465482	-0.968085	-0.480494	-1.04396	-0.189507	0.733822	0.272893	0.0220492
1.24_990.6678n	3.12831	0.463793	0.345528	0.0729237	0.170714	-0.0853356	0.739491	-0.490992	0.103027	-0.0102493	-0.492709	0.428023	0.92071	1.05266	-0.152471	0.779163	0.0619052	0.384823	0.879588	1.38979	1.35565	1.12563	0.870441	-0.0456859	-2.02978	-3.04167	-2.43143	-1.02405	-1.81448	-0.758651	0.487398	1.24768	0.0758597	0.755066	1.43146	-0.826787	-0.328697	-1.35807	-0.366676	-0.579003	-0.729333	0.112171	-0.993436	-0.260912	-0.884786	-0.0789678	0.554507	0.27865	0.0527351
1.73_341.3042m/z	2.64646	0.814681	1.11336	0.233038	0.991757	0.0317617	0.196101	0.366295	0.0875803	0.101959	0.140329	0.505584	0.864526	1.53813	0.413663	-0.730785	0.0697066	-0.213035	0.786698	1.21234	1.09187	1.89793	0.763539	0.39399	-1.02475	-1.86758	-1.02401	-0.559654	-1.74602	-0.910032	0.313979	1.39247	0.354455	-0.129916	1.21713	-1.06932	-1.43108	0.599134	0.0396094	-0.885966	-2.11665	0.421208	-1.44183	-0.35167	-1.42126	-0.293297	-0.105874	-0.651142	0.635994
1.11_478.2939m/z	1.51989	0.75296	1.48776	0.286192	0.213698	-0.0187094	0.233323	-0.938066	0.701591	-0.566885	-0.362716	0.793786	2.1575	1.24735	-0.302775	-0.241547	-0.283967	0.340786	0.129264	0.554654	1.66014	2.54655	1.29889	-1.08187	-1.05007	-2.17184	-1.13545	-1.41231	-1.67433	-0.970425	1.63475	1.96787	-0.307377	0.289225	1.49066	-0.00103525	0.462575	0.228512	0.293909	-0.467665	-1.0871	0.173498	-0.673454	-0.67466	-1.14495	0.283771	-0.11961	-0.0825643	0.242332
1.39_548.3712m/z	2.11632	0.685848	0.340899	-0.98711	-0.0783755	0.358004	1.00309	-0.177791	0.483329	-0.67969	0.0980854	1.67083	2.31408	1.69912	1.09536	0.198079	0.414271	0.416604	1.0503	1.02098	1.92639	1.83578	1.32598	-1.62537	-1.07999	-1.17751	-1.37775	-1.09987	-1.49198	-0.899648	0.412769	1.21088	-0.852494	0.643621	0.539269	-1.48752	-0.00651868	-0.208564	-0.571655	-1.29294	-0.412211	-0.141374	-1.29696	-0.400177	-1.35927	0.12662	-0.120912	-0.512399	-0.503055
1.36_480.3053m/z	1.87424	0.877328	0.955427	-0.0267866	0.226055	0.445928	1.14887	-1.0846	0.401042	-0.546566	-0.238038	0.426026	1.41925	1.34532	0.676882	0.0816875	-0.404234	0.743973	0.808943	1.66395	2.31813	1.3346	1.56231	-1.41581	-0.952619	-1.62339	-1.52575	-1.42734	-2.08312	-1.25427	0.910477	1.31505	-0.745412	0.15639	1.78681	-0.609257	-0.689951	-0.786272	0.545851	-0.541014	-0.590564	0.0937006	-0.38172	-0.560665	-1.0164	-0.0504944	-0.248782	-0.0624792	0.00401722
1.24_1016.6801n	2.811	0.260809	0.299535	-0.0926267	0.188709	-0.14912	0.537574	-0.334162	0.55776	-0.186247	-0.132804	0.769646	1.32148	1.47204	0.777806	0.623456	-0.164651	0.629005	1.04322	1.48407	1.63467	1.29215	1.16972	-0.176864	-1.4675	-2.32192	-2.54941	-1.71819	-1.729	-1.1018	0.63615	1.25608	-0.571433	0.502771	1.10775	-0.837722	-0.197744	-1.17719	-0.184261	-0.796891	-0.486561	0.482001	-0.899989	-0.247476	-0.907416	-0.478537	0.565996	-0.102367	-0.257166
1.24_184.0732m/z	2.92629	0.166159	0.690994	0.136907	0.626339	0.232309	0.656887	-0.197984	0.167606	0.0800573	-0.21663	0.740533	1.34771	1.15148	0.480098	0.465315	-0.12346	0.605686	0.987796	1.17451	1.46274	1.18983	1.14461	-0.608133	-1.64483	-2.8234	-2.08019	-1.11175	-1.97604	-0.968905	0.361049	1.61035	-0.0698589	0.752755	1.11598	-0.894631	-0.0651297	-1.33506	-0.0738498	-0.868247	-0.613206	0.290964	-1.08712	-0.393621	-1.11604	-0.36829	0.388372	-0.138908	-0.11933
1.31_716.3847m/z	2.43762	0.734956	0.543491	-0.0767278	-0.0855929	-0.012642	0.82738	0.100794	0.639609	-0.444386	0.0839526	0.540878	1.61472	1.64875	1.29937	0.247514	-0.166339	0.558552	1.4215	1.21838	1.58846	1.04995	1.40393	-0.728121	-1.67754	-1.90229	-1.40363	-2.0512	-1.7198	-0.911561	0.914612	1.45106	-0.196895	0.194165	0.861072	-0.617191	-0.0116994	-0.706854	0.599514	-0.843857	-0.813721	0.699154	-0.993526	-0.550964	-1.18901	-0.545301	0.234673	-0.822861	-0.188527
1.31_522.3563m/z	2.0192	0.405782	0.408591	0.209169	0.0193772	-0.175078	0.482092	0.0218824	0.960816	-0.309084	0.254944	0.830674	1.56761	1.77772	1.59611	0.494894	-0.411651	0.591279	1.37442	1.22929	1.52381	1.21541	1.52256	-0.958157	-1.10818	-1.87504	-1.79033	-1.55552	-1.84721	-1.43764	0.943541	1.27779	-0.84638	0.470416	0.789748	-1.1619	-0.302108	-1.29569	0.599014	-1.42308	-0.682929	0.540223	-0.563717	-0.287166	-0.917	-0.152785	0.546782	-0.0475239	-0.246682
1.31_606.3087m/z	1.83664	0.479543	0.748687	0.18253	0.177011	-0.0814782	0.296598	-0.0971665	0.943226	-0.365899	0.330967	0.900023	1.47533	1.97094	1.72172	0.279131	-0.203227	0.224617	1.28907	1.34695	1.39958	1.13275	1.33616	-0.880841	-1.04274	-1.80742	-1.90732	-1.91904	-1.81614	-1.52604	1.11352	1.24318	-0.622281	0.616459	0.485502	-0.722612	0.114732	-1.13263	0.892377	-0.692976	-0.869616	0.270733	-0.945459	-0.291328	-0.952721	-0.361079	0.371309	0.0779344	-0.0975954
0.67_512.3346m/z	1.97909	0.17963	0.886835	0.926559	1.32717	0.390692	1.17142	-1.1545	1.05343	0.615544	-0.254369	0.151844	-0.278595	1.28143	-0.327299	0.0883715	1.3376	0.776883	0.0275151	1.43803	0.325808	0.388597	0.419171	-0.223703	-2.3856	-2.16665	-2.15375	-1.9157	-0.0991358	-0.663957	1.94203	1.6526	0.0763522	1.09924	0.895044	-1.52001	-0.19311	-1.23973	0.623859	-0.882103	-0.644406	0.426074	0.116983	0.0762453	-1.47491	-0.425776	-0.299934	0.369886	-0.309682
1.73_104.1063m/z	2.07092	0.172985	0.584213	0.412432	0.681272	0.678208	0.855188	-0.542174	-0.290021	0.216823	-1.1145	0.543161	0.192598	0.958262	0.827469	0.341966	-0.0516128	1.07174	0.842683	1.34	1.04113	0.589363	0.942524	0.267644	-0.675057	-2.33216	-2.20016	-2.16616	-0.545349	-0.452111	0.400562	0.520242	0.958422	0.613296	0.840742	0.142404	0.531598	-1.10934	-0.221159	-0.0373497	-0.353917	-1.31857	-3.23524	-0.980956	-1.82	0.0610698	-0.496506	1.00891	-0.129881
1.61_184.0729m/z	3.31114	0.0272983	1.22512	-0.63384	0.748928	0.564318	1.21029	-0.310683	-0.227081	-0.487467	0.179922	0.0117991	0.443804	0.278277	0.606022	1.15147	0.579284	0.725489	0.447807	1.09051	1.03864	1.26416	0.826094	-0.121805	-1.43401	-2.11407	-1.67446	-1.02705	-1.05329	-1.13275	1.00681	1.27852	0.252143	1.09228	1.19095	-0.193177	-0.235788	-0.386305	-1.17275	-0.200849	-1.03701	0.127128	-2.22378	-0.730704	-1.46778	-0.60728	-0.212827	-0.327475	-0.360908
1.73_614.3408m/z	2.84015	0.648617	0.621935	0.0778023	-0.0381004	0.544794	1.00809	-0.235173	0.0209173	-0.0653217	-0.115923	-0.82459	0.769721	0.687133	1.00276	1.49718	0.227551	0.573913	0.837475	1.62115	1.27239	1.63091	0.943651	-0.295791	-1.70889	-2.41309	-1.19655	-1.38881	-1.34202	-1.29799	0.629139	1.07758	0.0903798	0.326773	0.745838	-0.827434	-0.831582	-0.264095	-0.421057	-0.420448	-0.550492	0.424826	-2.6258	-0.393261	-1.16924	0.00614882	-0.11893	0.323826	-0.653285
1.73_184.0729m/z	3.11488	0.398095	0.541752	0.00575812	0.604572	0.491743	1.02695	0.616169	-0.145561	-0.15122	-0.44399	0.147643	0.270356	0.836294	0.609154	0.909211	0.134307	0.305494	0.522271	1.70914	1.16491	1.4829	0.64831	0.288711	-1.60454	-3.62053	-1.65366	-0.855121	-0.742548	-1.43671	0.622235	1.10279	0.370663	0.554742	0.790645	-0.491687	-0.201869	-0.61387	-0.935316	-0.537664	-0.446052	0.181553	-2.62656	-1.0191	-0.87523	-0.00756232	0.336437	0.0609758	-0.186407
1.73_1046.7300n	2.76567	0.282607	0.429359	0.0512117	0.488829	0.471773	1.09793	0.169766	0.00133168	-0.429221	-0.783626	0.053467	0.274203	0.883466	0.760634	1.22582	0.34998	0.552268	1.21293	1.91194	1.20638	1.62054	0.860445	0.436414	-1.55574	-2.99532	-1.58175	-1.04476	-0.995152	-1.6395	0.494581	1.24378	0.583934	0.510391	1.11817	-0.492763	-0.650779	-0.415502	-1.04021	-0.404409	-0.875527	-0.361562	-1.20313	-0.767848	-1.08368	-0.36089	-0.275557	0.221398	-0.580313
1.73_487.2800m/z	3.1542	0.235738	0.631194	-0.120923	0.226855	0.487041	1.01526	0.201409	-0.215759	-0.372228	-0.267072	0.00211771	0.497347	0.969692	0.670132	1.26899	0.0441923	0.596063	0.860813	1.82488	1.26398	1.61862	0.793927	0.24886	-1.62579	-2.89868	-1.72592	-0.85943	-1.31005	-1.2037	0.381088	1.22003	0.495071	0.465041	0.945519	-0.614335	-0.300881	-0.424582	-0.59859	-0.354853	-0.790356	-0.204001	-1.94344	-0.615884	-1.19981	0.001194	-0.174481	0.393261	-0.235963
1.73_717.3928n	3.65377	0.518004	0.610753	-0.251569	0.251251	0.395105	1.00225	0.00133044	-0.0223706	-0.378751	-0.538571	-0.0640583	0.766501	0.677077	0.604406	1.44829	0.301984	0.378647	0.827411	1.72484	1.20869	1.72415	0.736502	0.116114	-1.81017	-2.1525	-1.52124	-0.991466	-1.13828	-1.42014	0.663568	1.21396	0.144642	0.71761	1.01255	-0.497638	-0.149694	-0.587419	-0.676289	-0.604941	-0.904161	-0.0976136	-1.7851	-0.761491	-1.31192	-0.233146	-0.279522	-0.12023	-0.551689
1.73_523.3652n	3.30243	0.375326	0.541542	-0.123169	0.249698	0.451271	1.05884	-0.0362898	-0.0938561	-0.384419	-0.526799	0.096194	0.498261	0.750078	0.7217	1.38883	0.234304	0.523034	1.00171	1.85865	1.22837	1.68806	0.730427	0.371511	-1.96025	-2.5521	-1.90709	-0.872977	-1.18694	-1.51567	0.492617	1.11314	0.36671	0.5447	0.919809	-0.41945	-0.426416	-0.423449	-0.733502	-0.552975	-0.891674	-0.149429	-1.50553	-0.544612	-1.06083	-0.18023	-0.0877075	0.20011	-0.45238
1.73_524.3720m/z	3.41858	0.440059	0.689289	-0.166332	0.380645	0.342798	1.09289	0.0837583	-0.000651726	-0.335922	-0.666167	0.218767	0.549078	0.799506	0.700135	1.17907	0.22563	0.381214	1.04723	1.67985	1.22564	1.68483	0.502011	0.0498505	-1.76045	-2.57529	-1.78829	-1.0464	-1.34974	-1.48153	0.660979	1.21386	0.412597	0.600976	0.911427	-0.4127	-0.468703	-0.481248	-0.714025	-0.568716	-0.666271	-0.0522687	-1.79111	-0.465015	-1.25376	-0.154736	-0.0148479	-0.0800706	-0.458323
10.47_855.0258n	-0.331256	-1.52396	-1.36497	-0.741205	-1.2649	0.294424	-0.571105	-0.257044	-0.897725	-0.31559	-1.56065	0.0538855	-1.23029	-0.653519	-0.768961	0.403558	0.585251	-1.17698	-0.587042	-0.0501928	-1.49637	1.65196	0.232302	1.97676	-1.02072	-2.08398	-0.590681	1.41172	-0.0873147	0.38204	-0.725264	0.173807	1.19185	-0.218789	1.01168	0.408417	0.231381	1.32408	-0.773256	0.337493	-0.735015	-0.817203	-0.521789	0.314277	-0.484663	2.37285	0.747273	0.812913	0.141759
10.47_856.5753m/z	-0.474071	-0.849036	-0.96495	-0.374807	-0.330839	-1.28506	-0.373126	-0.858592	-1.39316	-0.566613	-1.37048	-0.0911456	-1.42618	-0.147866	-0.997917	-0.0703717	-0.695841	-0.23695	-1.73891	0.657285	-1.07013	1.8772	-0.134989	2.49153	-0.571769	-1.1485	-0.190619	1.64612	-0.51216	0.321272	-0.236131	0.0633295	1.53779	-0.188232	1.43963	1.12668	0.817779	1.40361	-1.14497	0.743221	-1.07785	-0.615099	-0.966542	-0.814555	-0.0662737	1.72487	0.692017	0.778752	0.180763
2.76_401.3461m/z	0.614599	-1.05844	-0.588614	-0.136741	-0.0400395	-0.179058	-1.42267	-1.31542	-1.5562	-1.0868	-0.54548	-1.37408	-0.705606	2.04112	0.121886	0.093965	-0.570163	-0.262267	-0.0491076	-0.887172	0.752934	-0.536547	-1.2088	2.44215	-0.940522	-0.149865	0.12832	0.921948	-0.883281	0.0721831	0.17249	-0.430786	-0.673166	1.69205	3.01335	0.977468	0.363326	-0.365678	1.249	-0.391024	-0.648221	-1.60988	-0.111759	0.587987	-0.338186	-0.0134587	-0.875497	1.8427	1.3342
10.51_910.7869m/z	1.6199	-0.66226	-1.40056	-0.728529	-0.679979	-0.974288	-0.898609	-0.198617	-1.29951	-1.76568	-1.58799	-1.09387	-2.1067	0.199757	-1.10875	0.315664	-0.0844816	-0.324667	-0.22472	-0.0782806	0.440985	2.10308	-0.498683	2.74283	-0.173147	0.928427	1.13053	-0.328051	-0.403847	0.208853	-0.157879	0.837811	1.58511	0.742039	0.488925	0.409449	-1.22414	-0.686715	-0.595174	-0.523612	-0.455362	-0.885977	-0.747622	0.802102	0.342821	-0.184064	-0.373712	-0.290667	1.2677
10.62_1761.4826n	1.62203	-0.479372	0.485138	-0.575936	0.145295	-1.15326	-0.431478	-1.2512	-1.67639	-3.10147	-1.99193	-1.27162	0.149818	-0.463215	-2.26649	-0.0398388	0.156198	-0.101438	0.0240098	0.129847	0.75852	-0.246189	-0.322318	1.55184	-0.516493	-1.64025	0.341311	-0.00118407	-0.120663	0.270924	1.21141	1.29441	1.06733	0.115318	1.50857	0.572049	-0.235918	0.347461	0.75917	-0.350618	-0.646031	0.369145	-0.421526	-0.176876	-0.951944	-0.017155	-0.343551	-0.617414	0.935279
10.38_896.8682m/z	1.5078	-0.702304	-0.0074571	-0.738222	-0.158805	-0.0013322	-0.537719	-1.38869	-0.719896	-1.73668	-1.46381	-1.53618	-2.41668	0.0734416	-1.62243	-0.307069	0.416973	-0.400438	-1.01057	-0.373091	0.386172	-0.015566	-0.147744	2.48647	-0.704467	-1.7727	0.181948	0.554784	-0.474859	-0.544995	0.218613	1.34642	1.22503	-0.0482635	1.98225	-0.202181	-0.340444	0.367387	-0.233614	-0.189703	-0.427623	-0.45476	-0.476961	0.0599917	0.3295	0.809183	-0.0382262	0.0947502	0.428982
10.36_1780.4413m/z	1.13178	-0.612185	-0.427118	-2.21701	0.0328129	-0.134079	-0.381887	-1.63655	-1.29667	-0.952113	-1.60743	-0.890242	-2.40791	0.54848	-2.3323	-0.21019	0.32243	-0.223368	-0.664203	-0.119171	0.43488	-0.0761299	0.192097	1.67851	-0.345272	-1.86177	0.175687	0.607248	-0.0816171	0.314296	0.489397	0.684546	1.24702	0.670861	1.68406	-0.210794	-1.22526	0.25689	-0.0994583	-0.0466222	-0.847569	-0.690479	0.0841529	0.672316	0.34448	0.657839	-1.27542	0.261913	0.758023
10.36_955.8601n	1.31751	-1.03022	-0.28548	-1.8313	-0.0813153	-0.308122	-0.533104	-0.99907	-0.929121	-1.42525	-1.44799	-0.837549	-2.63763	-0.248893	-1.69324	-0.04734	0.293911	-0.531633	-0.612221	-0.606284	0.446675	0.22101	-0.246617	2.37991	-0.557914	-1.38338	0.256986	0.230901	-0.368289	0.195125	0.756157	1.03422	0.840916	0.954375	1.99155	-0.490675	-0.941188	-0.0588249	-0.300475	-0.148256	-0.140664	-0.708489	-0.20561	0.124242	-0.115251	0.550724	-0.605225	0.020383	0.199375
10.37_878.7385n	1.46883	-0.82042	0.305856	-1.8071	0.255955	0.0798771	-0.452398	-1.09071	-0.88151	-1.409	-1.47501	-1.14087	-2.54377	-0.173699	-1.99431	-0.577787	0.616575	-0.367405	-0.827287	-0.695098	0.663578	0.0791042	-0.0834411	1.9294	-0.58093	-1.45523	0.486688	0.288651	-0.369603	0.492349	0.858443	0.760866	0.962886	0.303365	2.03725	-0.499822	-0.94439	-0.0213941	-0.339953	-0.260241	-0.679589	-0.64851	-0.0955137	0.0970165	-0.0325004	0.482239	-0.639649	0.247141	0.261388
10.62_1810.4851m/z	1.12318	-0.939987	-0.220384	-2.52407	-0.843687	-0.950628	0.0945931	-0.463327	-1.70621	-2.19007	-1.38469	-1.58447	-3.36064	-0.487828	-0.904196	-0.128841	-0.0520665	0.174472	0.693397	-0.399213	0.664353	0.0235777	0.279086	1.67688	-0.524603	-1.28602	0.506016	-0.18089	0.315225	0.589262	0.655201	0.530907	0.833958	0.695759	1.27156	0.060382	-0.595015	-0.587616	0.253688	0.189079	-0.484062	0.483486	0.251054	0.235468	0.334595	0.256245	0.348029	-0.422927	0.583605
10.37_623.5049m/z	1.25472	-1.445	-0.661038	-1.38519	-0.330641	-0.496007	-0.350031	-1.18406	-1.3803	-1.65802	-1.17797	-0.882259	-2.68235	0.206915	-0.647115	-0.240664	0.115924	-0.341832	-0.455464	-0.674652	0.212315	0.474	0.224232	2.75912	-0.436324	-1.78958	0.0840761	0.349145	-0.445151	0.210233	-0.174657	0.809462	1.34133	0.694271	2.14335	-0.358381	-0.828502	-0.0554896	-0.127334	-0.266638	-0.234826	-0.672797	-0.243752	0.357429	0.233805	0.680943	-0.434206	0.421718	0.233834
10.62_625.5200m/z	1.93636	-1.51833	-0.524243	-0.675182	-0.688589	-1.06073	-0.394638	-0.532213	-1.57445	-2.1683	-1.36217	-1.44834	-2.93909	0.187585	-0.229467	-0.148165	-0.241631	-0.475094	0.0951622	-0.284782	0.574005	0.504403	-0.39268	2.50631	-0.527525	-1.33664	0.513641	0.31491	-0.139678	0.242532	0.713684	0.580074	1.42027	0.607534	1.58496	0.486732	-0.537321	-0.306378	0.271119	-0.573039	-0.356509	0.0276562	-0.215399	-0.0104454	0.119911	0.0586712	-0.0782026	-0.0412717	0.6034
10.35_649.5193m/z	0.0380411	-1.95785	-1.29257	-0.999643	-1.04925	0.0130093	0.250618	-0.541672	-1.29466	-1.12811	-0.952731	-0.47431	-1.9093	0.482623	0.82141	-0.15416	0.146144	-0.582674	-0.403777	-0.760766	-0.7209	1.162	-0.0397276	3.69431	-0.558522	-1.47191	0.559034	-0.0555274	-0.0530304	-0.12694	-0.473509	-0.18897	1.63687	1.02112	0.85539	0.0476141	0.174294	-0.562584	-1.4985	-0.0959193	-0.126646	-0.659902	-0.373387	0.131775	-0.251803	0.853473	0.447607	0.674886	-0.443999
10.61_906.7695n	1.20192	-2.2191	-1.69018	-1.25702	-1.30955	-0.573736	-0.616122	-0.486626	-1.54217	-1.70281	-1.56627	-1.18274	-2.42885	0.13066	0.341301	0.0971944	0.1607	-0.619432	0.529815	-0.159008	-0.406	0.848417	0.28087	2.64482	-0.835234	-1.80437	0.442016	0.508682	0.316659	0.413355	0.108562	-0.272623	1.38352	0.568518	1.05476	0.122202	-0.099826	-0.606314	-0.590606	-0.173742	-0.283512	-0.142563	0.192125	0.735289	0.113978	0.680988	0.0104953	0.273118	-0.14038
10.50_948.8034m/z	1.25559	-2.01008	-2.23812	-0.972677	-0.920763	-0.648203	-0.923312	-0.495287	-1.23711	-1.62734	-1.31933	-1.1868	-1.83134	-0.342746	0.619725	-0.0827873	-0.281047	-0.522849	0.483618	-0.598408	-0.47101	0.489553	0.33479	3.03051	-0.526215	-1.24097	0.867151	0.558671	-0.082279	0.418931	-0.534119	-0.423084	0.98589	0.494236	0.84728	-0.523971	-0.405661	-0.806992	-0.441238	0.396421	0.0921594	-0.231394	0.15928	0.495216	0.402637	0.40624	-0.483824	-0.0397853	-0.532667
10.62_945.7304m/z	1.03383	-2.19003	-1.7349	-1.59404	-0.617779	-0.678596	-0.49375	-0.887009	-1.00532	-1.68572	-1.07159	-0.959297	-2.2227	-0.506541	0.549857	-0.0790068	-0.407604	-0.323011	0.564994	-0.628755	-0.740239	0.204326	0.479217	2.46389	-0.393815	-1.43054	0.694331	-0.18647	0.413518	0.744545	0.071263	-0.669202	0.240528	0.585833	0.842793	-0.489284	-0.383522	-0.986112	-0.753579	0.779768	0.108691	0.0478088	0.662038	0.737533	0.278392	-0.0742092	-0.620207	-0.268315	-0.468224
10.36_1806.4541m/z	0.530463	-3.01045	-1.36765	-2.08795	-0.335328	0.24584	0.012594	-1.45815	-0.990945	-1.43629	-0.91322	-0.422671	-3.70775	0.35671	-0.523389	0.00331393	0.338771	-0.120047	-0.0174988	-0.121374	-0.0613539	0.326467	0.556448	1.16473	-0.150599	-1.52292	0.14545	0.502071	0.361914	0.602881	-0.205595	-0.412875	0.588938	0.749019	1.07558	-0.795597	-0.639483	-0.81425	-0.463277	0.367827	-0.0321161	-0.537469	0.714665	0.913413	0.784416	0.792274	0.174969	0.629609	-0.106487
10.37_922.8899m/z	0.915537	-2.03561	-1.61981	-1.61097	-1.29626	0.411855	-0.249851	-1.15186	-0.997573	-1.63458	-0.844578	-1.41969	-2.36645	0.986765	-0.0982464	0.272182	1.05845	-0.556702	-0.556756	0.0292218	-0.398985	0.643033	0.517994	2.14982	-0.785262	-1.29949	0.637127	0.284396	-0.0594241	-0.368147	-0.80266	-0.202454	0.760211	0.41747	1.02803	-1.03078	-0.0753646	-0.940397	-1.0783	-0.0046127	0.277741	-0.776507	0.190417	0.777598	1.50467	1.32885	0.330671	0.677821	-0.533795
10.35_949.8036m/z	0.690444	-1.84618	-1.70536	-1.97365	-1.25986	-0.0901743	-0.44695	-0.835019	-1.20376	-1.21304	-1.10047	-0.872856	-1.99001	0.61323	0.61052	0.174904	0.730317	-0.486654	-0.298635	-0.552138	-0.25376	1.08412	0.906031	2.82774	-0.566598	-1.12396	0.630929	-0.106745	-0.0331756	0.1224	-0.274987	-0.612085	0.826752	0.966747	1.21285	-1.14971	-0.45088	-1.26959	-0.982886	0.0796661	-0.124913	-1.16825	0.411864	0.702161	0.669496	1.11399	-0.300567	0.635519	-0.662309
10.36_904.7536n	0.732276	-1.94364	-1.6711	-1.98034	-1.2125	-0.240292	-0.736089	-0.988209	-1.19002	-0.987206	-1.27392	-0.625463	-1.89687	0.508749	0.193473	0.360071	0.652659	-0.755416	-0.336103	-0.328559	-0.553778	1.26017	0.762747	3.0862	-0.861628	-1.53445	0.144777	0.213706	-0.239929	0.171015	-0.560915	-0.195092	1.00739	0.942556	1.23718	-0.602405	-0.478469	-0.462516	-0.785661	-0.19362	0.0543531	-0.901186	0.0261281	0.676687	0.541117	1.46483	-0.171669	0.523135	-0.375213
9.99_926.7393n	0.69718	-0.895218	-1.12136	-1.22087	-0.00382068	0.0596378	-0.653399	-1.20009	-0.485988	-0.964239	-0.832041	-1.30287	-1.48114	1.33765	-0.522577	-0.366071	-0.515048	-0.626327	-0.513418	-0.389117	0.0624738	-0.668458	0.361359	3.61646	-0.640576	-0.425425	0.360338	-0.049293	-0.636772	-0.0245717	-1.24124	-0.547443	0.316663	0.424567	0.480389	-1.57138	-1.39742	-0.543894	0.552134	-0.0116837	-0.345199	-0.856091	0.608291	1.1737	1.38359	0.124599	-0.999914	-0.243446	-0.338414
9.76_947.7156m/z	0.26103	-1.27635	-0.930752	-1.14594	-0.150033	0.114018	-0.583753	-1.00043	-0.0560837	-0.669907	-0.851765	-1.06776	-1.03609	1.69844	0.147959	-0.0747363	-0.0280936	-0.511725	-1.01813	-0.474308	-0.0781989	-0.186885	0.569874	4.1691	-0.857596	-0.258866	0.0952552	-0.349244	-0.591574	-0.00322436	-0.974395	-0.85125	0.216617	0.427539	0.334006	-1.15572	-1.33139	-0.434157	-0.127263	-0.373133	-0.202176	-1.13242	0.499037	1.1507	1.19495	0.731949	-0.928147	-0.407481	-0.262491
9.87_900.7230n	0.692732	-1.27482	-1.20582	-1.53409	-0.523368	0.0202922	-0.69159	-1.44092	-0.29054	-1.03049	-0.983201	-1.07035	-1.26426	1.62051	0.0967357	0.0550517	0.360168	-0.676096	-1.00037	-0.262995	0.0909682	0.0583901	0.821656	3.67765	-0.938965	-0.924692	0.285597	-0.335398	-0.51937	0.115602	-1.07592	-0.453497	0.481613	0.677609	0.697437	-1.19595	-0.896997	-0.706109	-0.107191	-0.518686	-0.217392	-1.25673	0.457798	1.11958	1.01365	0.869811	-0.588034	-0.309029	-0.22252
10.09_623.5057m/z	1.03314	-0.380976	-1.2554	-1.50389	-0.794285	-0.536336	-0.772386	-2.01384	-0.690725	-0.940543	-1.10799	-0.766729	-0.899627	0.680324	-0.560022	0.496811	0.608804	-0.783744	-0.960762	-0.573192	-0.338814	0.425997	0.513073	4.00314	-0.254522	-0.270845	-0.648527	-0.565166	-0.640374	-0.454516	-0.656929	0.278403	0.468563	0.762522	1.31657	-0.905353	-1.09311	-0.136471	-0.629737	-0.573723	-0.0653308	-0.98888	0.35363	0.463696	0.622989	1.28438	-0.59984	0.150135	0.0402718
9.86_918.7565m/z	1.03018	-1.20277	-1.05863	-1.28602	-0.61028	-0.0177034	-0.760839	-1.17036	-0.519325	-0.880171	-1.05944	-0.927194	-1.41102	1.27308	-0.0549052	0.0794596	0.324591	-0.660984	-0.966171	-0.230377	0.0347237	0.319747	0.638861	4.71626	-0.893507	-1.09573	0.0773105	-0.000762317	-0.686231	0.0455566	-0.705817	-0.0853582	0.783714	0.446467	0.930526	-0.784551	-0.872432	-0.151152	-0.185305	-0.553619	-0.295878	-1.07437	0.0588382	0.772379	0.693744	0.85633	-0.599063	-0.333319	-0.0858203
9.86_977.8074n	0.538649	-1.10507	-0.900358	-1.09785	-0.542997	-0.0337652	-0.837454	-1.25303	-0.175894	-1.01977	-0.835562	-0.926883	-1.11709	1.32395	-0.0577631	-0.186619	0.170421	-0.678452	-1.05289	-0.420745	-0.241237	0.116502	0.504169	5.1101	-0.892036	-0.874326	-0.0534205	-0.268245	0.220716	-0.126774	-0.38318	-0.554463	0.396445	0.428604	0.57308	-0.933169	-0.124002	-0.460544	-0.336425	-0.187434	0.0748023	-1.04296	0.1786	0.772977	0.626654	0.805882	-0.753861	-0.477726	-0.213296
10.10_948.7964m/z	0.184205	-1.29405	-1.69595	-2.21448	-0.51554	0.210584	-0.41788	-0.968713	-0.584844	-0.468917	-0.549392	-0.450381	-1.10162	1.00338	0.49114	0.241927	0.528517	-0.541672	-0.655656	-0.334907	-0.332653	0.737677	1.23916	4.05719	-0.271555	-0.657982	-0.294425	-0.204478	-0.58958	0.0673844	-0.929512	-1.08674	0.0829802	0.432819	1.19295	-1.35145	-1.07541	-1.02481	-0.739513	-0.043052	-0.185666	-1.1635	0.656459	1.13192	1.09657	1.36476	-0.56014	0.33408	-0.68858
10.10_979.8205n	0.196886	-1.61435	-2.03002	-2.26564	-0.700729	0.124289	-0.386901	-0.971565	-0.689096	-0.468829	-0.543085	-0.506813	-0.902756	1.15646	0.451262	0.579529	0.642296	-0.535247	-0.520899	-0.257923	-0.641783	0.654907	1.34118	3.2861	-0.539693	-0.511183	-0.526109	-0.236455	-0.592313	-0.0385545	-1.07376	-1.07351	-0.0715319	0.420271	0.803662	-1.49692	-1.01224	-1.16615	-0.754105	-0.0220018	-0.0183429	-1.01958	1.00202	1.29192	1.28508	1.41455	-0.644325	0.500861	-0.442359
10.35_989.8068n	0.550908	-1.58474	-1.80829	-1.63325	-0.807887	0.0877784	0.0477545	-0.35538	-0.241713	-1.0124	-0.872673	-1.08318	-1.74545	0.85589	1.27378	-0.800081	-0.274897	0.0360281	0.406098	-0.62633	0.00655975	0.106178	0.93405	3.29355	-0.13866	-0.406719	1.0304	-0.348994	-0.216697	0.394456	-0.955303	-1.51004	0.532878	0.941646	-0.0101398	-1.53947	-0.737535	-1.59605	-0.95613	0.230623	0.0833888	-0.357022	0.598557	0.636926	0.579787	0.342185	-0.69836	0.100293	-1.10357
10.25_946.7868m/z	0.966623	-1.54535	-1.54735	-1.36599	-0.431374	-0.183196	-0.880235	-1.04788	-0.730409	-1.17588	-1.16029	-1.45286	-1.68543	0.83026	-0.126973	-0.148865	-0.316585	-0.735153	-0.281925	-0.462341	-0.0807855	0.040129	0.453645	3.2585	-0.687486	-0.712438	0.763131	-0.063125	-0.356679	0.466692	-1.08449	-0.66182	0.415601	0.334079	0.67075	-1.0507	-1.19823	-0.87825	0.0789437	0.1845	-0.166752	-0.674895	0.416872	0.92553	1.01412	0.216632	-0.7904	-0.187769	-0.296144
10.25_951.7432m/z	0.898353	-1.93056	-1.78423	-1.68119	-0.731556	-0.0935261	-0.83617	-1.0726	-0.904882	-1.08498	-1.13862	-1.03572	-1.60098	0.73973	0.356637	0.0633806	-0.100264	-0.640332	-0.332216	-0.522864	-0.228692	0.555047	0.669325	2.92076	-0.631823	-0.546771	0.80588	-0.280041	-0.293558	0.192318	-1.02605	-1.0598	0.228153	0.633209	0.668663	-1.16272	-1.00791	-1.09817	0.0504525	-0.0193379	0.144171	-0.826833	0.700653	0.952978	0.984941	0.276044	-0.539386	0.145145	-0.532294
10.24_1779.4293m/z	0.822808	-1.87827	-1.3454	0.0914687	-0.126557	0.158282	-1.28949	-1.32094	-0.928731	-0.575351	0.235608	-1.15001	-1.31087	-0.146499	-1.09542	-1.24243	-0.154544	-1.00437	-0.583134	0.259772	-1.27162	-0.95936	-0.623849	1.19817	-1.20905	-2.25037	0.501092	0.958631	0.11966	0.167111	0.0454612	-0.911602	1.94657	0.786424	0.973508	-0.565868	-0.529939	0.363256	-0.148801	0.651884	-1.07099	-0.702361	-0.235549	1.6224	0.361534	0.786183	0.374567	-0.144821	0.6241
10.23_920.8716m/z	1.02496	-1.04499	-0.54578	-0.0523761	-0.592093	0.306898	-1.13835	-0.999535	-0.361732	-0.52258	-2.43263	-1.95546	-1.16053	-0.254543	-0.533595	-0.500137	0.25604	-1.09974	-0.795783	-0.517729	-0.219452	-0.325976	-0.248567	2.56591	-1.14612	-1.88518	0.815521	0.291483	0.185047	-0.11937	0.338643	-0.0408488	1.27504	0.0197256	0.399795	-0.66862	0.0959476	-0.0946548	-0.448933	-0.159567	-0.674982	-1.48235	-0.121424	0.335735	-0.580002	0.591243	-0.143421	0.932682	-0.133747
10.24_1097.7732m/z	0.921694	-1.27148	-1.20712	-0.722841	-0.0450948	0.250162	-1.30903	-0.931308	-0.760157	-0.93758	-1.78676	-1.79043	-1.77171	-0.391319	-0.815428	-0.875671	-0.453974	-0.952565	0.0311769	-0.753425	-0.586088	-1.01548	-0.584561	1.11167	-0.70344	-1.31556	1.19202	0.574315	0.355292	0.175748	-0.0386185	-0.391881	1.14631	-0.0277505	0.206899	0.210591	-0.763587	-0.133567	-0.797507	0.313319	-0.23482	-0.661527	0.265564	0.996543	0.326457	-0.0849402	-0.244488	0.224532	0.405012
10.24_647.5015m/z	0.584857	-1.41183	-1.02112	-0.710362	-0.240496	0.437584	-1.18799	-0.84602	-0.402123	-1.08564	-1.71484	-1.44838	-1.73272	-0.712025	-0.38787	-0.639314	-0.791271	-1.04833	-0.375895	-0.482419	-0.565612	-0.207232	-0.00417452	2.59696	-1.16156	-1.68291	1.26123	0.71299	0.0292215	0.763921	-0.55614	0.0209272	0.964071	-0.157884	0.519027	0.304825	-1.06127	-0.0596701	-0.383117	0.305591	-0.432789	-0.4955	0.0637015	0.858377	0.169815	0.0732081	-0.538678	-0.213209	0.162635
10.01_950.7377n	1.0998	-0.956058	-1.5876	-0.271414	0.00149004	-0.38129	-0.586951	-0.943203	-0.592671	-0.600228	-0.392414	-1.39113	-1.05043	0.167387	-0.297417	-0.722532	-1.32756	-0.764271	0.033891	-0.743916	-0.117057	-1.97218	-1.04878	1.58776	-0.773344	-0.912189	1.25363	0.36874	-0.258546	-0.397741	-0.380041	-0.864165	0.769768	0.114152	-0.396328	-0.159419	-0.879445	-0.0516197	-0.267716	-0.163138	-0.395758	-0.638969	0.661622	1.3441	0.593157	-1.16002	0.0965656	-0.277242	0.127679
10.24_902.7384n	1.24781	-1.12371	-0.419396	0.0987547	-0.0476863	-0.265751	-1.2739	-0.561604	-0.667402	-1.30972	-1.59678	-1.92549	-1.91234	-0.306803	-1.18529	-0.431333	-1.29868	-0.929367	0.0234376	-0.807074	-0.165576	-1.63316	-0.761587	1.14182	-0.965034	-0.726787	1.24072	0.685113	0.49008	0.567374	0.125109	-0.453992	0.711348	0.25389	0.261432	0.306387	-0.680166	-0.583709	0.0349568	0.055985	-0.252922	-0.140939	0.49296	0.912875	0.522115	-1.67395	-0.693373	0.185853	0.597009
10.24_979.8216n	1.11821	-1.1363	-0.660855	-0.229252	-0.0789184	0.14714	-1.16419	-0.747259	-0.866524	-1.3559	-1.43887	-1.76492	-1.95809	-0.520622	-1.01276	-0.500212	-1.09072	-0.899517	-0.102509	-0.815053	-0.350467	-1.1299	-0.800725	1.11536	-0.807294	-0.913499	1.30147	0.677812	0.273724	0.644175	-0.224063	-0.322388	0.848655	0.152315	0.363774	0.228919	-0.804582	-0.214536	-0.312274	0.261133	-0.470749	-0.203435	0.155465	0.906777	0.361632	-1.31181	-0.655799	-0.0399926	0.304201
10.13_952.7544n	0.968517	-0.2399	-0.606834	0.00508889	-0.0789442	-0.464117	-0.804921	-0.847111	-0.658816	-1.40144	-0.889025	-1.62488	-1.62206	0.883286	-0.357183	-0.404693	-1.06108	-0.636604	-0.329212	-0.52309	0.162202	-0.908447	-0.269782	3.99223	-0.660316	-0.251257	0.891061	-0.531894	-0.452378	-0.0878637	-1.11655	0.0108388	0.56828	0.299248	-0.171546	-1.0135	-1.13991	0.181213	0.210523	-0.231774	-0.0720781	-0.623229	0.943729	1.03401	1.39756	-0.899247	-0.983082	-0.573389	-0.270912
10.13_949.7263m/z	1.78779	-1.19648	-0.912018	-0.310015	0.559536	-0.353058	-0.534893	-0.658306	-0.557162	-1.64579	-0.770922	-1.77066	-0.997461	-0.619173	-0.892821	-0.944735	-0.847593	-0.222783	0.214393	-0.576178	0.769068	-1.72281	-0.585514	2.78642	-0.0774702	-0.287141	1.55719	-0.228463	-0.044581	0.470035	0.81803	-0.541961	0.183209	-0.0914111	0.897762	-0.622216	-1.3942	-0.540634	-0.102326	0.079451	-0.0635455	0.108309	0.905578	0.377842	0.336376	-2.18108	-0.710075	-0.462197	-0.201944
10.14_986.8203m/z	0.803172	-1.27335	-1.24368	-0.829889	-0.154359	-0.574217	-0.889187	-1.49965	-0.742131	-1.4046	-1.26615	-1.144	-1.68784	-0.0994575	-0.383388	-0.815351	-0.20416	-0.341028	0.0348284	-0.533158	0.42363	-0.651367	-0.367027	3.02874	-0.560752	-1.18504	1.56908	-0.154392	-0.0029966	0.00689356	0.213523	-0.315695	0.58435	0.0974023	0.567434	-0.561556	0.0442963	0.27811	-0.455575	-0.33363	-0.345362	0.104112	0.200801	0.59585	-0.190686	-1.77655	-0.103232	-0.257473	0.201545
7.46_682.5385m/z	0.613716	-0.759234	-0.512577	-0.955722	-0.51286	-0.0242765	-1.36935	-1.68765	-0.716845	-1.04494	-1.37728	-1.17533	-0.608798	-0.570261	-0.411535	-0.306844	0.0719919	-0.521529	-1.20663	-0.662342	-0.993196	-0.921701	0.283977	3.42673	-0.275505	-0.74756	1.05081	0.400169	0.0529604	0.696057	0.515208	0.00089378	0.0552743	-0.0881272	0.384398	-0.810789	-0.630367	-0.123991	-1.13126	0.0932349	1.05889	1.36836	-0.850097	0.0669786	0.0109829	-0.688749	-0.50499	-0.297025	-0.212172
10.23_623.5055m/z	1.1471	-1.14152	-0.538303	-0.180131	-0.275345	-0.173274	-1.08928	-1.19356	-0.68676	-1.19877	-1.7822	-1.23941	-1.45044	-0.627829	-0.527652	-0.226798	-0.410547	-0.90043	-0.769794	-0.525551	-0.201563	-0.0777101	0.0558723	4.18078	-1.05729	-1.38905	0.885881	0.3222	-0.0384523	0.182263	-0.243322	0.30783	1.22127	0.128851	0.841392	0.50258	-0.834857	1.09149	-0.759141	-0.637978	-0.546034	-0.934642	-0.456377	0.437292	-0.159985	0.450192	-0.363658	0.0776276	0.614354
10.50_623.5060m/z	1.40882	-1.07664	-0.0840954	0.576061	0.455794	-0.481817	-0.60549	-0.575525	-1.09556	-1.68038	-1.5165	-1.6146	-1.32038	-1.07532	-1.01478	-1.33766	-0.864009	-0.67737	0.156889	-0.280405	-0.215889	-1.13103	-0.791507	3.43021	-0.965621	-1.27617	1.50341	0.865801	-0.285985	0.138594	0.565021	0.779901	1.21641	-0.25355	0.444236	0.709921	-0.171016	0.604123	-0.252936	0.317048	-0.574933	0.375697	-0.838738	-0.249099	-0.0961696	-1.23205	-0.0872493	-0.120031	1.05598
10.50_649.5192m/z	1.6297	-1.9582	-0.683297	-0.11526	-0.132769	-0.349155	-0.687296	-0.360587	-0.67646	-1.57266	-1.55524	-1.29846	-1.65339	-1.27567	-0.565283	-0.807087	-0.783747	-0.559813	-0.1005	-0.73011	-0.678251	-1.04933	-0.0712232	2.90697	-0.966688	-1.28486	1.38725	0.748252	-0.10051	0.465184	0.205111	-0.0649663	0.81719	0.219057	0.627791	0.758475	-0.58811	0.112519	-0.744475	0.435734	-0.13441	0.618038	-0.539849	-0.164025	0.00228617	-0.764704	-0.527606	-0.255845	0.397358
10.93_926.9229m/z	0.789024	-1.61035	-1.35869	0.2146	-0.863678	-0.998621	-0.762522	-0.171583	-1.41948	-1.89691	-0.776756	-1.44844	-2.1179	-0.422719	0.214438	0.139527	0.427772	-0.234998	1.32986	-0.234653	-0.793053	0.733893	-0.0359713	0.474276	-1.29409	-1.65695	1.25239	0.759565	0.616704	1.27174	0.458296	-1.21363	1.25253	-0.386548	-0.220962	0.810249	0.941037	-0.514533	-0.105841	0.0422877	-0.217568	0.918343	0.980698	0.514938	-1.324	-0.0325171	-0.757807	-0.51178	-1.10652
10.91_1102.8150n	1.04695	-1.50682	-1.45454	-0.906645	-0.957278	-0.247741	-0.439895	-0.916249	-0.810876	-2.12487	-1.23324	-1.63621	-0.965808	-0.757543	-0.340482	0.58207	-0.222067	-0.310328	1.16584	0.429043	-0.803056	0.679383	-0.0717164	0.923666	-1.22527	-0.883681	0.859851	0.196634	1.59386	0.960196	0.558182	-1.07681	1.10646	-0.743539	0.00907988	0.0860651	0.434921	-1.79746	-1.66996	0.429821	-0.45371	0.995664	0.778279	0.932118	-0.331533	-0.299635	-0.403064	-0.63302	-0.616645
10.91_985.8686n	0.898695	-1.74268	-1.84044	-1.10094	-1.25697	0.090006	-0.445208	-0.00528427	-1.16745	-1.63229	-1.73689	-1.50816	-2.11479	-0.620644	-0.183505	0.138809	-0.117038	-0.118808	1.67973	0.099697	-1.44465	0.871046	0.483118	0.818061	-1.03856	-0.722897	1.05386	0.516568	1.55703	0.89214	0.123052	-0.631495	0.890508	-0.194933	-0.548789	0.108938	0.561759	-1.4482	-0.572161	0.495371	-0.0590287	0.960751	0.832886	1.32275	-0.270003	-0.556886	-1.00329	-0.419803	-0.584804
10.91_625.5200m/z	1.02517	-2.11278	-1.77716	-0.51761	-1.41223	-0.428383	-0.608479	-0.2581	-1.39725	-1.46524	-1.64114	-1.49099	-1.50939	-0.409014	-0.0281985	-0.122116	-0.615714	-0.46563	1.99028	0.553834	-1.27294	0.761873	0.269915	1.01504	-1.44975	-1.07594	1.05117	0.851308	1.13231	0.723128	0.379986	-0.877924	0.755297	-0.5351	-0.4045	0.27748	0.360416	-1.26922	-0.531217	0.00255626	-0.308073	1.13847	0.798838	1.19777	0.525389	-0.403967	-0.44604	0.099072	-0.130618
10.91_908.7859n	0.847479	-1.66357	-1.73318	-0.706319	-1.5461	-0.175666	-0.658082	0.178195	-1.31242	-1.7416	-1.85937	-1.56003	-2.26999	-0.372243	-0.0106699	-0.424418	-0.401671	-0.453175	1.89466	0.329125	-1.20202	0.876346	0.104815	1.32778	-1.19854	-1.24928	1.08662	0.89751	1.48208	0.996969	0.344674	-0.681687	1.04214	-0.155893	-0.0899516	0.516622	0.569072	-0.903603	-0.442382	0.3669	-0.280048	0.961356	0.547142	1.13087	0.0055195	-0.455178	-0.296531	-0.450619	-0.269946
10.50_1099.7879m/z	1.75206	-1.2642	0.134333	-0.288587	0.544667	-0.0867625	-0.170704	-0.1489	0.0948054	-1.406	-1.22124	-2.57045	-0.754622	-0.972888	0.079619	-0.274271	-1.07738	-0.721885	1.00652	-0.88197	-0.0390107	-1.15151	-1.81907	1.57896	-0.313362	-0.363542	1.7	-0.186411	0.54004	0.62528	1.25764	-0.293549	0.0247742	-0.331403	0.335891	0.0240106	-0.531925	-1.82046	-0.572068	0.759364	-0.124708	0.576508	-0.0374441	-0.0182638	0.0806324	-2.42224	-0.820693	-0.534422	0.324948
10.51_904.7529n	1.42973	-1.20259	-0.107849	0.470149	0.305081	-0.360421	-0.733866	-0.110009	-0.607711	-1.82583	-1.76059	-1.66457	-1.87254	-1.35363	-0.420164	-0.921104	-1.24442	-0.516107	0.987204	-0.733777	0.319879	-1.61985	-1.11482	2.52411	-0.562192	-1.00872	1.4503	1.04077	0.269899	0.302619	1.02485	0.0858654	1.02627	-0.453007	0.11089	0.545904	-0.288672	-0.00726092	-0.206059	-0.00473802	-0.192272	0.154359	-0.138582	0.280962	0.0537381	-1.66807	-0.727599	-0.367449	0.640563
10.51_981.8367n	1.55894	-1.20172	-0.547758	0.389339	0.202152	-0.583314	-0.883633	-0.345452	-0.555216	-2.11381	-1.61961	-1.94387	-2.01784	-0.905982	-0.203427	-0.79695	-1.03462	-0.201301	0.369076	-0.62962	-0.289276	-1.59152	-0.875762	1.63954	-0.416085	-0.949822	1.6199	0.477857	0.546353	0.576251	1.16831	-0.222862	0.641852	0.0927113	0.344025	0.193056	0.0411913	-0.676434	-0.09689	0.588301	-0.177003	0.123651	0.100145	0.259613	0.397895	-2.08446	-0.854457	-0.530449	0.454274
10.78_955.7709m/z	1.12696	-1.40251	-1.48546	-0.568338	-0.461572	-0.437076	-1.07464	-0.655004	-0.268967	-1.04712	-1.5096	-1.74948	-1.9841	-0.297749	0.361616	-0.979899	0.181509	-0.526252	0.953595	-0.686593	-1.13989	0.528974	-0.657293	2.59661	-1.42721	-0.798891	1.75119	0.395252	0.719431	1.14448	0.466016	-0.348051	1.15742	0.731789	0.40277	-0.24919	-0.264882	-1.06475	-0.09104	0.649415	-0.244464	0.659242	-0.00215613	0.108004	-0.104998	-0.609884	-0.751802	-0.736916	-0.835461
10.78_992.8658m/z	1.23302	-1.53193	-0.747562	0.226547	1.21936	-0.770712	-0.92337	-0.789977	-0.593347	-1.16253	-2.07072	-1.81023	-0.972972	0.176953	-0.16851	-0.505759	-0.616381	-0.53251	0.649088	-0.344316	-1.40316	-0.868875	-0.883659	2.3986	-2.03527	-0.533753	1.34098	0.0140708	0.530364	0.374294	0.576786	-0.0863953	0.42861	-0.267822	-0.0653527	0.144795	-0.762699	-0.950658	0.187268	1.13492	-0.32108	0.663309	0.447471	0.909992	0.41645	-1.15305	-0.745566	-0.607969	-0.155745
5.11_780.6364m/z	1.06841	-1.28721	0.245234	-0.0157971	0.868784	-0.762552	0.209042	0.188215	-0.250609	-3.13245	-0.672588	-1.10975	-1.64538	-0.0644147	0.370221	0.159096	0.0988464	0.699903	-0.325582	-1.12011	1.05334	-0.238194	0.0268494	3.69315	-0.523503	0.825302	1.15894	-0.767186	0.745239	1.68896	-0.463773	0.24302	1.27616	0.24608	0.992232	0.869522	0.920028	-1.24113	-0.776039	0.233489	-0.400057	-1.1309	-1.18141	0.0696551	-1.05587	-0.8535	-0.515418	-0.333759	-1.23213
5.29_638.5685m/z	-0.485759	-0.487958	-0.186477	-0.302676	-0.525219	-0.238209	-0.507552	-0.00849744	0.175293	-0.344354	0.385458	-0.514868	-0.31045	-0.0982476	0.229724	0.00204275	-0.14342	-0.723214	-0.901881	-0.440963	-0.546273	0.153176	-0.354971	5.13858	-0.819021	-0.273633	-0.256436	-0.308901	4.52923	-0.251104	-0.288381	-0.807132	-0.445533	-0.204817	-0.129022	-0.490505	0.688406	-0.530325	-0.438346	-0.72758	0.46782	-0.197884	-0.174345	1.1397	0.534721	-0.0840581	0.0988178	0.198722	-0.138392
7.29_834.6917m/z	0.899784	-0.253924	-0.340701	-1.4309	1.06424	0.613728	0.977128	-0.123407	-0.8918	-0.894504	0.0702692	-0.430653	-0.698613	-1.83164	-0.411082	1.25776	-1.43642	-0.12832	-1.01108	0.901728	0.521052	-0.0774993	-0.893708	3.09002	-0.74236	-0.901953	1.34096	-0.212012	-0.00787414	0.195053	-0.0515987	0.895352	-0.281751	0.00074038	0.371731	0.907342	-0.584777	0.386624	-0.256209	0.263124	-0.23505	0.819749	-0.736417	-1.02743	-0.815001	-1.34758	0.0270746	-1.02618	-0.88112
7.30_836.7872m/z	1.40403	0.0769621	-2.06846	-0.284072	0.543803	-0.382689	0.155188	-0.0341109	-0.721335	-0.0996801	0.0996495	-2.63528	0.431873	-1.30814	-0.302247	0.927172	0.269822	-1.31548	-0.391551	0.115182	1.04088	0.118563	-2.18981	2.48277	-2.39703	0.0351136	1.04903	0.565163	0.218172	0.648592	0.0329882	0.685881	0.598228	0.623823	-0.851727	0.875966	0.162184	0.674078	-0.287368	-0.228142	-0.455207	-0.018452	0.334449	-1.33921	1.37108	-0.397002	0.0883229	-0.431145	0.907178
1.79_268.2186n	-0.423458	0.0826571	-0.839914	-0.844015	0.944847	0.765989	1.04045	-2.44579	0.10193	-0.0891596	-0.843589	-0.642033	-0.807568	0.389078	0.44116	0.176092	-0.407017	0.544612	-0.832224	-0.359895	1.17726	-1.03216	-0.817734	2.0257	-1.87511	-0.683612	1.259	0.974719	0.633349	0.92915	-0.566469	-0.558847	0.386886	0.732543	-0.0177805	-0.733999	-0.706316	-0.0142784	0.659799	-2.05744	0.390658	-0.304688	-2.52813	0.985319	0.81677	-0.831417	0.105227	-0.632623	0.428643
5.64_1231.8333m/z	0.28392	0.782512	-1.23879	-0.809313	0.391658	0.444047	-1.12884	-0.860205	-0.287238	-2.48284	-0.189571	-0.0269052	-0.095568	-1.17722	0.479404	1.13938	1.03835	-0.70881	0.177671	-0.0635391	0.243448	0.872756	-1.52377	2.19048	-0.223473	-0.86423	1.172	0.0270445	1.26583	1.38821	-1.29084	-1.61752	-2.33825	-0.0665024	-0.882983	-0.546385	-0.589637	-0.5371	-0.690778	0.144522	0.945156	-0.680526	0.0383053	1.40022	0.109755	-0.381233	0.377395	-0.420784	-0.0797174
4.66_772.5493m/z	2.2405	-0.581992	-0.0785787	-0.0529707	-0.0160621	0.0105897	0.174732	0.688816	-1.85321	-0.179076	0.902345	-1.16911	-0.20179	0.0979575	-1.5078	-0.802298	-1.35786	0.656619	-0.969141	-0.109428	1.64054	-0.166913	-0.95046	0.0487768	-1.10759	0.300539	0.66013	1.20858	0.692048	1.64909	-0.421662	-0.787669	0.130448	-0.440495	1.31923	2.41757	0.329381	0.334449	-0.173713	-0.446692	-1.09062	1.30797	-0.295467	-0.281645	-0.491251	-0.93307	-0.589916	-0.301927	1.34161
9.94_888.7604m/z	1.27956	-0.309418	-0.354246	-0.357109	-0.615541	-0.040912	-0.367832	-0.381805	-1.5013	-1.04934	0.236504	-1.48891	-1.71731	-0.67351	-1.88382	-0.205403	-0.171848	0.700899	-1.41792	-0.723865	-0.00379521	0.943168	-0.598759	0.998562	-0.34377	-0.419373	0.730884	1.65572	0.455822	1.33628	-0.74358	0.0309991	0.782871	0.0639803	2.17233	2.67942	-0.696105	0.300108	-0.754042	0.293838	-0.75095	0.409978	-0.821815	-0.392173	-0.399256	-0.196957	-0.0245075	-0.385209	0.407453
6.74_1532.1162m/z	1.36566	-0.352219	-1.48436	-1.07974	-0.562914	-0.360718	0.61069	0.891174	-2.13014	-1.36975	0.0851718	-0.394985	0.712708	0.662247	-0.226579	1.14506	-0.619855	-0.0381838	1.44649	1.36445	1.40696	-0.961629	-0.354014	0.898511	-0.166435	0.21199	1.50874	1.18163	-0.00404696	0.8619	-2.09322	-0.51366	-1.44361	-0.582164	0.245393	1.2629	0.272132	0.834599	0.543496	-0.742479	-0.850767	-0.645841	-0.560696	-1.07175	1.15365	-0.387674	-0.424031	-0.444984	0.732342
6.78_784.6705m/z	0.919223	-1.69897	-0.591419	-0.464501	-0.606687	-0.606213	-0.0211987	0.00438736	-1.27681	-1.1251	0.172006	-0.803657	0.0370138	0.77679	0.522617	-0.728285	-0.38216	0.185733	0.0514826	-0.191299	1.76927	0.127934	-0.0970243	1.36038	0.515759	-0.194164	1.72889	1.66493	-0.0897464	0.948414	-1.38114	0.0127562	0.0146444	-0.441154	0.436507	2.35575	1.05594	1.76062	0.126261	-1.59217	-0.851996	-0.560329	-1.22579	-0.175929	-0.396458	-0.464258	-1.19078	0.545002	0.0975384
7.95_812.8943m/z	1.6639	-1.37726	-0.229667	-0.132772	-0.0264243	-0.942631	-0.0802359	-0.329788	-1.44007	-1.00329	-0.630045	-0.501112	-0.858383	-0.138599	0.51991	-0.125791	0.243542	-0.346083	-0.701526	-0.344225	1.37527	0.0839461	-0.764378	1.62365	-0.0753439	-0.550428	2.73226	0.958919	-0.945034	0.992221	-0.152236	0.0623324	0.468989	0.295142	-0.30754	2.48368	1.11981	1.62042	0.480916	-1.19707	-1.02175	-0.806818	-1.26016	-0.847689	-0.0409968	-0.357623	-0.878209	-0.0729501	0.131151
5.20_779.6057m/z	0.318605	-0.975934	-0.585145	-0.879371	-0.0145843	0.724941	0.0928734	0.341754	-0.569576	-0.250994	0.835733	1.09938	0.900205	-1.1478	0.0603974	-0.0128835	0.0719967	-0.716768	-0.507029	-2.16398	0.508389	0.046769	-0.781844	3.09407	0.0426631	0.838008	1.18662	1.46343	1.16612	0.842711	-2.75043	-0.347554	0.267647	0.624516	0.403041	-0.00391279	1.32476	0.145801	0.445683	-0.388416	-0.107638	-1.18575	-1.57064	0.563241	-0.658182	-0.62763	-1.38948	-0.836687	-1.88445
8.55_787.9298m/z	0.130559	-0.512468	-1.20887	-0.328507	0.198004	0.304473	-0.50412	1.17131	-0.341935	1.39843	0.397409	0.204837	-0.318765	-1.83119	-1.3458	-0.115676	0.00204782	0.364342	1.26558	0.172692	0.32091	-0.282698	-0.759405	1.05446	-1.36314	0.605373	1.45896	1.32489	0.806409	1.73213	-1.1934	-1.15687	0.570865	-0.285237	0.360449	0.157266	1.70288	2.30547	1.54983	0.199736	-1.34085	-0.817812	-0.859308	0.86041	-1.41642	-0.548723	-1.20097	-1.14729	-1.93151
0.58_298.0246m/z	0.64306	0.428959	0.402289	1.15992	-0.153906	0.788575	1.43008	-2.35808	-0.675558	-1.16118	-0.826278	0.887386	-2.01404	-0.339513	-0.806887	-0.547088	-0.460178	0.00229377	-0.0799403	0.572581	0.26878	-1.70478	-1.12134	1.01092	-0.982432	0.387124	0.932444	-0.2539	-2.33749	0.78665	-1.85239	0.727167	-0.378521	0.528291	-2.12482	0.981928	-0.314945	2.22187	0.3493	0.292736	-0.0214009	-0.490083	1.24962	0.617248	1.48273	-0.390249	-1.24508	-0.0720398	0.716181
0.58_312.0404m/z	1.35992	-1.40998	-0.0789539	-0.519974	1.72736	0.558461	0.545788	-0.74465	-0.416131	-0.717168	-1.15719	0.471796	0.846224	0.777352	-0.665792	0.39833	-0.778592	-0.631463	-0.273814	-0.702576	-0.458825	-0.195331	-0.709061	0.493256	-0.242844	0.105044	1.2234	0.803137	-2.36559	1.03019	-0.310208	0.576077	-2.57696	0.677142	-0.133728	1.48592	0.442509	2.23017	0.266861	-0.22242	-0.153338	-3.87291	0.106119	0.138527	0.72546	-0.35663	-0.176537	-0.243737	0.688483
7.90_1278.8216n	-0.0163604	0.39536	0.180288	0.0274946	-0.412836	0.612709	-0.725837	0.371569	-0.857135	-0.538246	1.33433	-0.634288	-0.159559	-0.504938	-0.540508	-2.23154	-0.747092	-1.02663	0.125666	-0.0471448	0.768297	0.00593222	-1.16905	-1.54907	0.449598	0.424412	0.820638	0.500921	0.452248	0.961297	-0.884928	-0.414461	-0.109657	-0.745451	-0.776324	1.72678	-0.176601	0.296853	1.29174	0.405435	-1.39726	-1.62104	0.488544	0.462276	1.17287	1.08465	-1.14211	0.584151	1.33922
9.39_637.6357n	-1.34023	-1.09354	-1.08429	1.03422	0.0877941	0.238742	0.0918242	1.26993	-0.566364	0.059031	-1.06964	-0.31927	-1.52183	0.874257	0.258557	-1.06216	-0.256581	-1.18516	0.361369	0.773648	-0.22129	-0.625848	-1.42966	0.599124	-0.790102	-0.654433	0.946109	1.69848	0.326813	0.72576	-1.21896	0.0117105	-0.140939	-0.0604104	-0.398832	1.99029	-0.189092	1.22735	0.223291	0.398513	0.00416078	-0.719706	1.17099	1.07162	2.29416	-0.589562	0.538565	1.51138	0.550022
9.19_623.6213n	-1.73995	-1.2211	-1.21249	0.89781	1.40457	0.350717	0.731052	0.857021	-0.545338	-0.0801905	-1.01264	-0.729201	-1.67111	0.446984	0.284412	-1.49402	-0.912021	-0.50379	0.139265	0.6655	-0.445679	-0.711785	-0.866771	0.270287	-1.00734	-0.765241	0.67987	1.84805	0.0812393	1.06581	-0.979496	-0.311615	-0.467175	0.248992	-0.0808088	1.42259	0.664183	1.31626	0.374641	0.690777	-0.743004	-0.0270221	0.898711	1.23781	2.03582	-0.373682	0.199867	0.919013	-0.600021
9.57_651.6523n	-1.3787	-1.3094	-1.12994	0.883105	1.19957	0.381707	0.681368	1.23617	-0.471266	0.250992	-0.896468	-0.372465	-1.46618	0.45347	0.308066	-1.92799	-0.942767	-0.478933	0.637465	1.1101	-0.641465	-0.870807	-0.436489	0.354198	-0.640364	-0.621277	0.594368	1.82601	-0.0167508	0.732609	-1.18597	-0.291639	-0.34365	-0.282379	-0.410331	1.11675	0.103202	1.1699	0.650891	0.856164	-0.422261	-0.072227	1.12823	1.35801	2.074	-0.256002	0.542317	1.07985	-0.0181012
8.88_804.6989m/z	-0.967771	-0.344007	-0.869976	0.0667889	0.395039	-0.183496	-0.360111	1.27709	-1.0989	0.439214	-0.718453	-0.700489	-1.12146	-1.1394	-0.0556308	-0.920784	-0.88803	-0.921007	-0.0138173	0.340866	-0.00900843	-1.45309	-1.48471	0.645737	0.134538	0.595581	1.97316	2.65901	0.409413	1.13725	-1.14031	-0.539892	-1.50588	-0.139948	-0.0175765	1.94241	-0.015597	2.24357	0.260628	0.378649	0.0922234	-1.07194	1.1184	0.709542	0.973352	-0.459353	-0.397902	0.407412	-0.0467999
8.28_761.6532m/z	-0.786483	-0.120604	-0.743052	0.357767	1.11509	0.171422	0.241085	0.397258	-0.850414	-0.166518	-0.818777	-1.46682	-1.50452	-0.817095	-0.602563	-0.47638	-1.60308	-1.24644	-0.429083	0.368212	0.236529	-0.582057	-1.67355	0.608842	-0.511913	0.522335	1.95834	2.12148	1.36123	1.55096	-1.09056	-1.15838	-0.907641	0.0130912	0.0969427	1.41165	0.613929	1.13221	0.746704	0.195808	-0.53678	-0.727216	0.525522	1.33679	0.986384	-0.919109	-0.391142	0.392175	-0.734882
8.68_789.6843m/z	-0.850634	-0.316268	-0.963683	-0.162298	0.816646	-0.0820079	-0.136417	0.81069	-0.677771	0.545398	-0.811192	-0.834853	-1.3293	-1.30036	-0.253784	-0.879389	-1.42206	-1.2668	-0.332998	0.0998301	0.0222236	-0.894622	-0.793641	0.426391	-0.858123	0.770058	2.15891	2.61462	0.572427	1.88126	-0.704988	-1.31307	-1.14054	-0.502345	0.0577793	1.31236	0.723376	1.76638	0.537069	0.0900497	-0.377378	-1.08124	1.34235	0.882512	1.16541	-0.450885	-0.499118	0.389173	-0.741533
9.41_692.6829m/z	-0.414551	-0.0705368	0.11993	-0.932241	-1.17135	-0.090535	0.361808	1.14394	0.642563	-0.756523	-0.870739	-0.142767	-0.199131	-0.26346	1.45953	-0.400696	-0.433579	0.483112	-0.0498692	-0.551954	0.190518	0.2595	0.023334	0.012009	0.0286378	-1.35823	2.20881	0.0884341	-0.933286	1.40952	0.209327	-1.07339	-1.23594	-0.958819	1.86856	0.319244	1.56416	1.76323	-0.828522	0.255697	-2.2472	-3.25971	0.261304	-0.118619	0.815025	0.351711	-0.625372	0.615934	0.523701
8.62_552.5699m/z	-0.849819	-1.18319	0.0652985	0.936448	-0.127531	-0.7631	-0.54289	0.214565	-1.15593	-0.652351	0.585422	-0.000383756	-1.45394	0.161717	-0.741946	-2.17843	-1.46886	-0.00109662	-0.604375	-0.0191793	0.196674	0.670863	-1.6767	1.90228	0.554633	-1.66178	2.47683	1.77531	-0.483719	0.929865	0.919874	0.483593	1.54547	-0.562332	1.18492	1.50492	0.45169	0.871779	0.972171	0.18202	-0.631194	-1.05187	-0.947472	-0.759742	0.812688	-0.126859	-0.143794	0.235995	0.283085
9.02_580.6008m/z	-0.0967013	-1.5992	-0.216054	0.593171	-0.28607	-0.741572	-0.526979	0.269963	-1.09739	-0.846086	-1.20102	0.0873312	-1.25788	0.531016	0.557362	-0.989985	-1.98905	-0.896973	-0.540585	0.161695	-0.12427	0.741999	-0.993227	1.92509	-0.628161	-1.27181	2.05081	1.11594	-0.343592	1.53096	0.611278	0.203052	1.96908	-0.557099	0.852818	1.10961	1.06294	1.01807	0.0774922	-1.24466	-0.32825	-0.720229	-0.39569	0.0089196	0.92714	0.618193	0.282724	0.63065	0.777277
0.55_218.1383m/z	-1.14684	-1.203	-0.125623	0.154586	0.360992	0.628124	2.01182	0.538908	0.409562	0.161551	0.487535	1.06624	0.0384341	0.336471	0.625035	0.914848	-2.03294	-1.36624	-1.93241	-1.99063	1.37438	-0.412779	0.661389	-0.574398	-0.520259	-0.54889	1.08872	0.869937	-0.568406	0.833641	-0.236289	-1.61334	-0.507323	0.924335	-1.04734	2.58622	0.59516	1.26977	-0.984856	0.451582	-0.521998	-1.3739	0.25754	-0.207405	0.60825	-1.01762	-0.338369	0.817372	-1.64691
10.41_821.2586m/z	-0.984024	-0.88371	-0.95166	0.0121216	1.28193	0.651527	0.677901	0.378112	-0.228966	0.185999	1.56923	0.518597	-0.386497	0.785538	0.903631	-0.280378	-0.12996	-2.4422	0.564238	0.325632	0.0266165	-3.94046	0.571801	0.613823	0.861614	-0.854783	-0.103076	1.49976	0.0968314	0.823062	-0.626211	-1.93415	-1.48898	-0.559671	0.831782	0.306234	0.0124974	0.137618	0.715187	0.958288	-2.02868	-0.404466	0.136247	-0.122908	0.407029	0.78653	1.04072	-0.125054	-0.325187
1.27_543.3436m/z	-3.70992	-1.62687	-0.174743	0.0404667	0.507091	-0.0539576	-0.340914	0.403396	-0.309234	0.0346093	0.761633	1.5557	-1.15569	-0.410818	0.620627	-1.44038	0.632091	0.869608	-0.709442	-1.73252	-1.71324	-1.62063	-0.107057	1.66	0.985104	1.55983	0.381826	0.498114	1.11161	-0.256651	-1.11301	-0.087425	0.44048	-0.182354	-1.10517	1.54794	0.738856	0.824974	0.375386	1.09709	-0.504501	1.81698	0.449406	0.499596	1.03715	0.180066	-0.768004	0.102235	0.365488
7.80_333.2249m/z	-0.653759	-2.53988	0.12105	-0.0637567	0.982097	0.0393146	0.923134	-0.717351	-0.817303	1.13281	0.441723	0.126341	-4.27925	-1.01265	0.338336	-2.45657	-0.126151	0.673352	0.176283	-0.731773	-0.125994	-0.410921	0.735379	0.178066	-0.0903274	-0.282065	-0.963785	0.570772	0.00276731	0.371257	-1.14569	0.0302233	-0.812093	-1.66801	0.38336	0.600872	-0.348456	0.737027	0.523212	-0.0951023	0.655412	0.949384	0.59879	1.01911	-0.650578	0.453898	0.944552	0.869541	1.32475
0.59_315.0036m/z	0.696237	-0.389744	-0.898156	0.546616	-0.00716633	-0.289473	-0.618767	1.46624	-0.469442	-0.400788	-1.35746	0.637832	-2.68577	-0.642712	-0.0203369	-0.385932	-1.01286	-2.24915	-1.63764	-0.813224	0.311665	0.122823	0.585904	-0.0275393	-1.10954	0.367263	-0.0280441	0.398741	-0.792329	-0.429851	1.58355	0.804266	1.30172	-0.598267	1.50358	0.941612	-1.12175	1.87818	0.348074	-1.03484	-0.155266	-1.13178	-0.725102	1.53475	1.01306	1.07142	0.222363	0.478157	1.38234
0.55_302.1961m/z	-4.54392	0.464281	-0.316256	0.116458	0.376255	0.563761	-0.649221	0.415786	-0.557495	-2.47984	0.722217	0.372919	0.0419922	0.235106	-0.402887	-0.205139	0.353248	-3.36182	0.258039	-0.389845	-0.715651	0.179263	0.148378	-0.355797	-0.592616	0.282281	0.631867	-2.18233	-0.430965	-0.475717	0.534099	-0.839473	0.246938	0.444015	0.461154	0.237233	0.106876	0.898211	0.39993	-0.0614269	0.898882	-0.34146	0.132456	1.1565	0.841014	0.969734	0.29873	0.41084	0.745958
1.25_485.5072m/z	-2.43018	-1.98764	0.928035	1.06998	-0.261119	0.561117	0.832723	1.20951	0.46478	0.390451	-0.574283	-0.996756	-1.12029	1.43053	-0.396744	-1.23268	0.0710294	-1.35785	0.447304	-2.42703	-0.339721	-0.316465	-0.857143	-1.66042	-0.241657	-0.243791	0.624169	1.02278	-0.471451	0.529413	-1.05891	0.0177662	1.47792	0.596764	0.0348114	-0.963881	-0.64632	1.2212	1.35991	-0.43573	-1.61705	-0.378331	1.52052	1.38554	1.27585	0.936547	-0.0801904	1.28793	1.67146
5.28_1247.7418m/z	-1.08213	0.0445167	-2.19651	0.825778	0.0298659	0.221509	1.0839	0.720325	1.15701	1.14015	1.56527	-1.85957	-1.32682	-0.0767746	-0.869772	-1.19477	0.244801	-1.14228	-0.153465	1.19671	-0.482421	-0.845022	-0.881736	0.522036	0.302087	-1.01704	0.833094	1.06699	0.773261	-0.108051	1.4054	-0.350341	-0.0127801	-0.356534	-0.250351	0.798592	0.993754	-0.802621	-0.954084	-3.37531	-0.218079	-1.14087	0.152573	0.574822	0.472602	0.153478	0.0434315	0.781798	0.0526264
6.89_1195.6205m/z	-1.01422	-1.72456	-0.550826	0.518835	-0.416777	-0.624889	0.772425	-1.19252	1.52407	-2.12897	1.16606	-0.953862	-1.41941	-0.535465	-0.545047	-0.865194	0.977679	-1.03188	-0.0118688	0.92253	0.906912	-1.00961	-0.197795	0.717976	-0.482153	-0.962116	0.346311	2.36502	1.49274	-0.0292979	-0.0521992	-0.979885	-0.782985	0.895824	1.00494	-2.19912	0.968777	0.265685	-0.982785	-0.689106	0.960661	0.694556	0.972092	2.02131	0.489766	-0.282165	-0.0808775	-1.68589	0.170752
9.46_958.7024m/z	-0.86517	-0.0700652	-0.901773	-0.181333	-0.523179	0.470623	-0.745229	-0.702046	1.2645	-0.943307	0.767632	-0.4795	-1.2087	-0.501866	-0.51439	-0.56234	-1.19846	-0.788311	-0.904151	-0.269631	-1.05312	-1.05462	-0.419367	1.52056	-1.06293	-0.159754	-0.0794916	-0.0368367	0.1521	0.643288	0.878099	-0.344163	-0.606098	0.637525	-0.50032	-0.852899	3.00493	-0.585065	-1.14607	1.12477	2.35324	-0.606258	0.728634	0.19708	0.490987	0.293153	-0.428641	-1.27681	0.207068
4.84_530.4012n	-0.322544	-0.413263	-0.599731	-0.711387	-0.0402271	1.4753	1.2125	-0.594287	-0.402741	-0.686867	-0.630641	-0.604584	-0.532515	0.258266	-0.679296	-0.482177	-0.510936	-0.606207	-0.734737	0.518684	-0.665101	-0.484114	-0.657292	-0.531234	-0.625742	1.29889	2.12895	-0.353603	1.16081	1.61692	-0.520332	-0.565495	-0.756085	-0.538885	-0.484736	-0.165095	-0.148543	-0.501638	-0.410945	-0.682706	-0.0927394	-0.567585	-0.45149	-0.643552	-0.615405	3.5559	-0.328811	-0.513597	-0.0359767
4.96_546.3962n	-0.407418	-0.0782777	-0.453896	-0.593524	0.0792509	1.77728	1.16116	-0.551048	-0.373023	-0.761556	-0.435497	-0.63264	-0.34581	0.20004	-0.480257	-0.465988	-0.398051	-0.473482	-0.770309	0.359588	-0.465897	-0.340322	-0.425768	-0.660097	-0.479986	1.28447	2.50781	-0.367356	0.883215	2.01586	-0.478902	-0.793533	-0.917976	-0.627511	-0.427317	-0.122505	0.141988	-0.712875	-0.610013	-0.461199	-0.368383	-0.650423	-0.650214	-0.601032	-0.505183	2.99354	-0.70319	-0.636843	-0.72676
4.96_623.4787n	-0.662174	0.0195595	-0.610135	-0.695015	-0.00875304	1.73854	1.0462	-0.748377	-0.227093	-0.791353	-0.412997	-0.490551	-0.306769	0.22813	-0.828439	-0.506217	-0.824691	-0.75438	-0.628562	0.181964	-0.57089	-0.452578	-0.26136	-0.333385	-0.403604	1.24133	2.4749	-0.104117	0.695809	1.94203	-0.532856	-0.780419	-0.932066	-0.373588	-0.746296	-0.218617	0.198082	-0.468209	-0.411477	-0.366602	-0.166933	-0.55012	-0.561644	-0.646624	-0.680882	3.08644	-0.488125	-0.576697	-0.494553
10.13_1012.8384m/z	0.897105	-1.22278	-1.70588	-1.15986	0.450191	-0.680616	-0.957432	-1.05826	-0.213435	-1.12816	-1.14972	-1.5036	-1.51858	0.783898	0.170012	-0.262747	-0.347683	-0.270784	-0.923063	-0.153637	0.247594	-0.518873	0.345559	2.26295	-0.386562	-0.705261	1.05667	-0.94209	0.308105	0.947867	-1.11786	-0.91168	-0.237288	0.511917	-0.809672	-0.635568	-0.675319	-1.02694	-0.189325	0.328875	-0.152198	-0.674316	0.780742	1.45166	1.81481	0.186224	-0.345011	-0.0782448	-0.850813
9.87_973.7302m/z	0.433985	-0.97418	-1.10281	-0.941692	0.512563	0.1267	-0.477805	-0.710057	-0.366715	-0.775581	-0.555815	-1.4306	-1.08065	0.682061	-0.793068	-0.167124	-0.773108	-0.339671	-0.192641	-0.31245	0.0540822	-1.11789	0.11471	1.13236	-0.179279	0.580072	0.915266	-0.569172	-0.15143	0.245499	-1.43581	-1.7205	-0.427298	0.167506	-0.433184	-1.91099	-1.26657	-1.37417	0.234223	0.797905	0.108107	-0.385772	1.41094	1.87649	1.62626	-0.771194	-1.12941	-0.163624	-0.354579
10.25_949.8148n	0.742611	-1.13671	-1.3892	-1.16182	-0.191129	-0.29987	-0.555126	-0.900584	-0.568957	-1.23474	-0.659179	-1.46981	-1.4327	0.886321	0.260847	-0.355154	-0.744783	-0.316133	-0.0697097	-0.69026	0.0827314	-0.954514	0.503151	2.32623	-0.24918	0.12465	1.12191	-0.564872	-0.270638	0.346148	-1.39162	-1.23017	-0.0808875	0.734136	0.107596	-1.58103	-1.38406	-1.36743	0.497707	0.297664	0.264642	-0.582054	0.915923	1.11047	1.44741	-0.531035	-1.00432	-0.324944	-0.702602
9.99_1003.8199n	0.30468	-0.92983	-1.26456	-1.64816	0.259647	0.260026	-0.638342	-1.21212	-0.364835	-0.786199	-0.629544	-1.31714	-1.17753	1.57023	-0.333669	-0.498645	-0.496646	-0.644907	-0.460976	-0.165887	0.034743	-1.29156	0.346478	1.95951	-0.559561	-0.124526	0.292784	0.0813477	-0.443793	0.218676	-1.63018	-0.864794	-0.0197422	0.498603	0.211149	-1.75575	-1.76481	-0.763154	0.814585	0.152729	-0.282932	-0.688854	0.907477	1.42547	1.80814	-0.137956	-0.916234	-0.0381605	-0.340709
9.99_972.7964m/z	0.334631	-0.685278	-1.11816	-1.39418	0.123327	-0.0510584	-0.452123	-1.28527	-0.214511	-0.969791	-0.399084	-0.813007	-1.16125	1.71786	-0.199894	-0.372392	-0.77211	-0.795705	-0.562932	-0.346612	0.0243633	-1.04802	0.490658	1.83959	-0.445042	-0.248848	0.349196	-0.018721	-0.614569	0.00491924	-1.50161	-1.16178	0.210426	0.452776	0.1048	-1.88334	-1.17301	-1.27909	0.814721	0.242648	-0.405379	-0.665279	0.777644	1.45339	1.64638	-0.490045	-1.46168	0.16483	-0.298489
10.66_623.5070m/z	-0.727088	-1.56342	-1.76093	-0.756094	-1.51829	0.898048	-0.753463	-0.501092	-0.15687	-0.631834	-0.589218	-1.75981	-1.0997	-0.0583698	-0.633798	-0.61092	-0.0785222	-0.589283	0.96815	0.547086	-1.10307	1.03633	0.674588	1.57132	-1.27771	-0.612959	0.695079	0.417133	1.35341	1.06542	-1.23822	-1.57005	0.858834	0.0252069	0.192752	-1.13036	-0.926845	-1.39345	-0.713212	0.156304	-0.351364	0.0649082	0.880074	1.73378	0.243271	0.911506	-0.825534	-0.22069	-0.564838
10.77_976.8383m/z	0.999133	-1.0978	-1.16903	-0.332191	-0.168457	0.10268	-0.526218	-0.416538	-1.19862	-1.31846	-1.23838	-2.43311	-1.38562	0.207559	-1.08646	-0.698942	-1.30943	-0.402856	0.904349	-0.0844037	0.113154	0.943625	-0.216611	1.1702	-0.190918	-0.174465	1.92428	-0.763199	0.0826344	0.185466	0.129196	-1.16738	1.11507	0.687359	0.271266	-0.935404	-1.01426	-1.48269	-0.702836	0.577178	-0.240094	0.550277	1.14513	0.71568	0.106572	-0.509059	-0.874909	-0.175797	-1.11776
10.52_990.8502m/z	0.810953	-1.81096	-1.39975	-0.998366	-0.00115832	0.0648265	-1.065	-0.658962	0.2328	-1.59843	-0.650968	-1.78722	-1.33778	-0.0369403	-0.340091	-0.656119	-0.708434	-0.00107515	0.824482	-0.615626	-0.538554	-0.842341	-0.0264541	1.02287	-0.859394	-0.0273411	1.51047	0.0257622	0.634129	1.28438	-0.530551	-0.727676	-0.0507151	-0.179023	-0.0314514	-0.676816	-0.684111	-1.53547	0.10761	1.23385	0.307677	0.362664	1.20602	0.744246	0.672822	-1.58347	-1.2246	-0.883255	-0.895952
10.53_953.7585m/z	1.01723	-0.951655	-1.26922	-1.0303	0.2147	-0.481297	-0.844873	-0.873073	-0.383556	-1.82364	-0.727584	-1.85734	-1.72753	-0.708893	0.120405	-0.64168	-0.777695	-0.224618	0.563905	-0.773152	-0.159576	0.0610899	-0.305961	1.68255	-0.130276	-0.0690414	1.35976	0.244852	0.452479	0.559124	0.165953	-1.21689	-0.058215	-0.147367	0.700983	-0.57543	-0.657892	-1.26767	-0.319701	0.721214	0.158767	0.00634394	1.16614	0.595473	0.483478	-1.29558	-1.31907	-1.12802	-1.17815
10.26_967.7162m/z	-0.128888	-0.246936	-1.03335	-0.140439	0.473593	-0.264412	0.0751918	-0.154609	0.244667	-0.638946	0.244322	-1.14029	-0.515555	0.775571	-0.218918	-1.18318	-1.32193	0.00912033	0.804543	-0.400305	0.434619	-1.6285	-0.484672	-1.09193	0.341805	1.45887	0.853178	-0.83079	0.307832	0.952602	-0.908245	-1.39984	-0.842804	0.321086	-0.683824	-1.57959	-0.708703	-1.6786	1.51962	0.585299	0.558303	0.260358	1.61075	0.858427	1.50327	-2.72387	-1.13193	-0.19886	-0.488887
10.56_979.7734m/z	0.540081	-1.47652	0.747942	-0.410112	0.155249	-0.0986163	-1.0081	-0.567731	-0.451417	0.134723	0.114235	-1.46314	-0.100226	-1.12914	1.55632	0.262461	-1.09692	0.128348	-0.133578	-1.69017	-0.803532	-1.65668	-0.109926	1.88988	0.65054	1.12485	1.64703	0.23248	-0.150633	1.5859	-0.477851	-1.4673	-0.124002	0.207778	0.79768	-1.43223	-0.365864	-1.69778	-0.12715	-0.270193	0.378645	-0.0603737	0.0905381	0.643457	-0.321869	-0.683144	-2.08452	-0.241997	-1.88512
0.55_247.1427m/z	-0.221305	-0.952363	0.351217	-0.120558	-1.11263	0.353475	-1.7841	1.27954	0.15875	0.522616	0.522596	-1.00614	-1.49056	0.0268709	0.316608	0.0666372	0.0722489	-0.963824	-0.486638	0.628157	0.224068	-4.24538	0.162946	-0.0980215	-1.68445	0.460039	1.42056	-0.00576421	0.374592	-0.273018	-0.312978	-1.33353	-1.56002	0.369447	1.06491	0.525121	0.584414	1.4801	0.524445	0.726496	0.563761	-1.22043	0.945967	1.30301	0.100541	-0.607916	-0.504036	-0.598883	0.853128
0.57_211.9919n	-0.0858209	-1.75178	-0.311865	0.39477	-1.71615	0.728362	0.816343	-1.71085	0.352019	0.00867922	0.0913748	-0.0924376	0.0973227	0.0136028	0.31032	0.0351227	-0.117822	0.307017	0.252827	-1.5466	0.0947601	-1.32565	-0.390265	1.1118	-3.2414	0.835431	1.0185	0.424451	0.597158	0.929864	-1.23177	-3.30003	0.881584	0.276297	0.741601	-0.331049	-0.287251	0.560816	0.198676	0.0955118	-0.0300282	-0.718501	-0.29677	-0.853854	1.32857	-0.391467	-0.977643	0.0682433	1.15078
0.59_736.4678m/z	0.904982	1.03441	0.345245	-0.584887	-0.182199	-0.402139	0.203835	0.272572	-0.737993	0.921384	0.405755	-0.426973	-1.33647	-0.849289	-0.733122	0.495349	-3.01728	0.0120508	-2.06742	-2.18624	-0.47154	-0.797644	-0.231299	-0.248233	0.15429	-0.278007	0.643675	0.811312	0.0782479	0.0196418	-0.186838	0.676659	0.588576	-1.77971	0.197301	-0.452681	-0.967058	0.932366	0.762801	0.317343	-0.157958	-1.62347	2.23059	-0.825029	-0.250633	0.128055	0.561324	0.382687	1.34999
0.55_1148.8481m/z	-0.255818	0.65148	-1.06689	-0.547205	-0.28584	0.0263768	-0.929137	1.05107	0.940753	0.660054	-0.963577	-1.59856	0.103142	0.173043	-0.45196	-0.38673	0.198282	-2.02872	0.913503	0.251454	1.13385	-2.03564	-0.871925	-0.00280603	-0.600956	0.622353	1.0236	0.909789	0.955629	0.473177	0.194612	-0.152168	1.59504	-2.74281	0.10616	-2.17527	0.564636	0.0329859	0.559415	-1.6725	-0.0767969	-0.676635	-0.0608372	1.63223	0.197604	0.076342	0.499236	1.26901	1.67319
0.58_280.9865m/z	-0.865858	0.0156365	-1.24987	-0.219754	-0.652132	-0.541905	1.32367	0.142747	0.386501	0.225944	-0.281845	-0.0976444	0.439461	0.46462	-0.299307	-1.36719	0.356456	-0.462402	-0.487569	-0.501643	-0.125568	-2.30367	0.236922	1.44041	-1.17527	0.438982	0.666902	0.539235	-1.32925	0.44172	-0.693719	0.739549	0.676131	-0.90322	-0.526777	-3.60696	-0.124067	-0.121207	-0.430193	0.173524	-0.391338	-0.661358	-1.02777	0.29309	1.93809	-1.36224	1.01759	0.164672	0.41503
2.01_768.9160m/z	1.73231	0.0771747	-3.87652	-0.660663	0.448584	1.13789	0.200928	-0.0505223	-0.226432	0.233143	-0.0542426	0.30841	0.485245	-0.294568	-0.120126	1.37658	0.110455	-0.763034	0.541491	-0.0440807	-1.2708	0.0997746	-0.113501	0.955661	-0.768483	0.0669485	-0.360195	-0.907266	1.04304	0.440043	0.558565	-0.234471	-0.5446	-2.14204	0.758609	-0.412667	-0.198062	-0.727746	-0.364101	-2.03963e-05	-3.8701	0.739768	0.474835	0.126136	-0.665902	0.183669	0.246754	0.407981	-0.149481
8.54_820.1531m/z	-0.00495248	-1.21989	-1.59434	-1.94139	0.82221	-0.465172	-0.664031	0.707882	-0.275578	0.477907	-0.529768	0.31924	-0.153134	-2.05195	-1.02535	-0.0865556	-0.183021	-0.695314	1.87748	1.60473	-0.366618	-0.42648	0.930586	1.79985	-1.24432	0.300131	0.324263	1.30865	-0.234447	0.0950497	-0.715248	-0.410258	-0.717063	-1.05044	-1.23669	-0.783879	0.806152	2.56515	1.3034	0.954954	-0.101879	1.44502	-0.468339	0.113601	1.08586	-1.0834	-0.907248	-0.46351	-1.15925
8.54_1216.9974m/z	0.338595	-0.0787579	-2.14702	-0.741288	0.469888	0.00788017	-0.444752	-0.567921	0.52489	0.0157765	1.87607	-0.109238	0.287312	0.495488	0.175743	0.456009	0.706593	1.04253	0.892079	1.79146	-0.336781	0.824783	-0.420772	-0.411032	-0.879534	-0.0672877	0.368419	0.543544	1.97184	0.683611	-0.848159	-1.4977	-3.19408	-1.60439	0.68684	-0.0294948	1.4322	0.985206	-0.312195	0.15565	-2.18266	-1.18454	0.973338	-0.66408	1.06327	-1.65491	-0.616725	-0.852938	0.244859
8.53_1599.3326n	1.27526	-0.520784	-1.88625	-0.981224	0.0254056	-0.0572	-0.674959	1.21324	-1.00695	-0.189892	-0.233815	-0.434169	1.19102	-0.604302	-0.671075	1.2091	-1.12924	-0.511676	0.498062	2.2807	0.00997762	0.0719675	-0.473482	-0.494534	-1.24343	1.15812	1.00248	0.652439	1.20271	0.963026	-1.6199	-1.81795	-1.7149	-0.902926	-0.491784	-0.573278	0.741787	0.944708	0.813871	0.178906	-0.884546	-0.604325	1.31261	0.70559	1.56064	-0.591145	0.0608424	-0.379906	-0.69392
8.54_1573.3188n	0.406466	-0.53639	-1.97183	-0.0527026	0.309871	0.014524	0.121195	1.06522	-1.16644	0.462336	-0.697232	-0.484024	-0.0434708	0.666137	-1.02397	0.652973	-0.794332	-0.0759798	0.718403	1.8886	-0.134	-0.0620455	-0.467081	0.34334	-1.95011	0.513986	1.19487	0.951417	0.726499	0.978447	-2.18659	-1.894	-1.04369	-0.582334	-0.134303	-0.0282765	0.908514	1.86666	0.472557	0.326577	-1.53064	-1.17408	1.39819	0.868268	1.85011	0.239675	0.196794	-0.10784	-0.487191
0.76_412.3056m/z	0.172827	0.0276494	0.00122141	-0.698884	-0.890995	1.49545	-0.658241	-0.160364	0.676498	-0.505883	0.867824	-1.30063	-0.0505561	-1.42732	0.940564	0.808329	0.159858	0.0445126	0.161021	0.160111	0.555961	0.913019	-1.6332	0.112735	-0.420803	0.458282	1.21649	0.338925	1.48953	0.893826	-0.357874	-0.813133	-1.80517	-0.0950353	-0.880838	-1.05368	0.598813	-0.21199	-0.652591	-0.506305	0.579534	-2.00861	0.195396	0.023061	0.772379	-1.13246	-2.82624	0.335039	-1.96352
0.65_313.2255n	-1.79692	0.2779	-0.83942	-0.754495	-1.48514	1.41569	-0.367045	0.367871	-0.539958	-0.405755	1.12176	0.942992	0.4181	-2.69521	0.237508	1.10111	-0.235894	-0.796181	0.170839	-0.817792	-0.540188	0.915795	-0.719934	-0.494598	1.04756	0.265858	0.138563	0.854065	1.116	0.913129	-1.95942	-0.145938	-1.0783	-0.627841	-0.23441	-1.53059	-0.938495	0.594478	-1.00703	-0.207957	0.00418103	-0.36798	-0.323016	0.847739	1.01185	-1.10776	0.29323	1.20803	-0.920185
0.67_340.2466m/z	-1.21118	1.61516	-0.693152	-0.268266	-1.18815	1.3169	-0.16347	1.33238	-0.282988	-0.591028	1.24746	0.867772	0.252896	-2.03933	0.0589065	1.00177	0.0157004	-0.528183	0.0705647	-0.553482	-0.535624	-0.487141	-1.81551	-1.07242	0.793596	-0.246667	0.215259	2.71438	0.617671	0.539115	-1.27552	-0.71487	-0.818446	-0.874302	-0.501899	-1.36048	-0.703291	-0.0232884	-1.04585	-0.529713	0.0378202	-1.02173	0.0130739	0.0951114	1.34481	-0.943638	-0.371404	1.25475	-0.775204
2.10_217.0180m/z	0.616779	-0.358918	-2.22708	-1.91746	-1.21107	-0.0786721	-1.13011	0.376921	-2.42139	-1.04794	1.05488	-0.124811	-1.20675	-1.76373	0.713339	0.785635	0.310789	-0.910098	-1.20573	0.701347	-1.62842	-0.243623	-0.0504376	0.00852947	0.77054	1.20376	0.393443	1.10965	1.07489	-0.421679	-0.555766	-0.900557	0.688483	0.554214	-0.801674	0.393174	1.10078	0.728384	0.132615	0.644572	0.265389	0.00255353	-0.689416	0.717133	0.671065	0.554621	0.533316	0.831722	-0.557
3.92_725.5587m/z	-0.320279	-0.785631	-1.4544	-1.82798	0.391975	0.58079	0.826232	-1.31486	-1.77244	-0.110937	0.000900277	0.292977	1.20487	-0.949082	-1.21854	1.18974	-0.224137	-0.396477	-1.25464	0.387928	0.146988	0.00272037	0.469511	0.00744242	0.294038	1.52492	0.233118	1.36017	1.10029	0.645692	-3.48375	-1.34559	-0.789704	-0.412374	0.450446	0.471424	-0.0772049	0.978637	-0.51587	0.0769138	-1.4894	-1.42258	1.10013	1.23745	1.48972	0.285852	-0.452622	1.2188	0.0716206
6.13_755.6043m/z	1.07782	-0.223559	-0.896566	-1.67049	-0.651456	1.18598	-0.72459	-0.751128	-1.42664	-0.648057	0.180387	0.240314	1.62308	-0.554799	-1.13227	-0.544192	-0.554461	-1.09733	0.462409	0.696445	0.666003	-0.237964	-1.0436	-0.0663143	0.0422555	1.32716	1.55361	1.09777	2.37615	0.470804	-2.96006	-1.29233	-1.55162	-0.51271	-0.691093	0.918574	1.23283	0.18457	0.680803	0.0550874	-0.94146	-0.488058	1.2695	1.05505	0.580508	-0.878652	0.69615	0.46538	-0.707965
8.70_841.7141m/z	-0.971626	1.64631	-1.39988	-1.34551	-0.770656	0.722211	0.129964	-0.339182	0.593174	0.166751	-1.3796	-0.226895	0.35144	-2.78231	0.929136	-1.01261	-0.17449	-1.69421	0.250629	0.498728	-0.392077	0.652893	-0.348823	-1.02718	0.711339	1.98815	0.580136	0.822362	2.4379	0.2543	-0.319052	-0.665375	-1.5165	-1.02873	-1.09919	0.863012	2.05406	0.504844	0.248893	-0.37024	0.409827	0.341088	0.898559	0.544761	-0.299367	-0.541962	-0.695838	-0.677585	-1.73042
0.59_284.9932m/z	0.0394666	-0.346287	-0.943333	-1.65619	-0.137675	1.0988	-1.26084	1.33818	-0.243238	0.33247	0.124672	0.349359	-1.54306	-1.13151	-0.318109	0.461286	0.0120766	-0.293525	-0.0571325	0.224249	0.243009	-0.106448	-0.22462	-0.265389	-0.501657	1.57068	2.52419	-1.3678	0.373217	0.184319	-0.382289	-0.125589	-2.54126	0.0806641	-0.193062	1.50597	1.86921	0.464768	-1.37985	0.431536	-0.906615	-1.6225	-0.632243	-0.0182028	0.910896	-0.914288	0.381709	-0.526844	-0.77362
1.11_396.2412m/z	-0.379203	-0.0292152	-0.205651	-0.631508	1.03902	1.88341	0.644009	-0.618135	-0.981242	-0.387904	-0.825613	-0.607781	0.0665628	-0.826063	-0.510493	-0.327822	-0.229296	-0.353245	-0.319564	-0.587354	-1.05791	-0.495688	-0.421876	-0.195543	-0.294445	2.5125	1.72642	-0.484655	0.100631	1.79066	-0.201606	-0.49533	-0.682722	-1.05848	0.0988558	0.149184	2.64668	-0.373881	-0.88608	-0.608198	-0.736278	-0.871801	-0.645352	-0.543228	0.357813	-0.861094	-0.215333	-1.13906	-0.180132
7.75_1642.6693m/z	0.55899	-0.761694	-0.299402	-1.44154	-0.232446	1.9257	2.23876	0.257701	-0.671895	-0.643229	1.03523	0.052042	-1.79877	-2.48995	0.430704	1.50172	-0.126466	-0.532871	-0.384332	0.544927	-0.584081	-0.173299	-0.616245	-0.483965	1.55989	1.02148	1.22218	0.303377	0.906548	0.222485	-0.793291	-1.22058	0.395059	0.0103903	0.20763	-0.464381	-2.85901	-0.708298	-1.21718	0.305791	0.628999	-1.13397	-0.085189	0.828358	1.08761	-1.66456	-0.168022	0.0576656	-0.381201
9.94_907.6822m/z	0.463372	-0.851468	-0.587553	-0.841581	0.110318	0.623712	0.586838	0.163986	-1.72885	-0.853229	1.44898	-1.72433	-0.924615	-0.827304	-1.24088	-0.227904	-0.596726	0.789848	-0.159229	0.0800455	-0.256889	-0.83113	-1.88018	-1.37582	0.201438	0.327304	0.889588	1.44966	1.46753	1.86171	-0.157041	-0.941127	0.105163	-0.00421709	1.32313	2.23799	0.0877171	-0.649799	-0.488322	0.873782	-0.110966	0.841002	0.0732635	-0.342178	-0.359113	-1.73926	-0.246018	-0.903416	-0.382328
9.96_933.6974m/z	-0.321931	-0.741135	-1.79523	-1.67819	0.0692314	0.788983	0.415356	0.354874	-1.86936	0.781189	1.5753	-1.27268	-0.958644	-1.0917	-0.833606	-0.107924	-0.524053	0.686803	0.338066	-0.377792	-0.345746	-1.31778	-0.551199	-0.51883	0.662981	0.528786	-0.313455	1.67422	1.07323	1.96382	-1.56042	-2.22807	-0.867675	0.0719917	0.431395	0.790368	-0.156257	-1.63823	-0.907689	0.658068	0.753979	1.00801	1.27392	0.278803	1.47601	-1.23314	-0.862348	0.483423	-0.0123062
8.37_829.6800m/z	0.105913	-0.531007	-1.03808	-0.402935	-0.822571	-0.0454948	-0.620027	1.52955	-0.905306	-0.821319	0.170947	-0.468563	-0.240554	-1.70147	-0.315156	-0.160783	-0.235436	-0.6257	0.454105	0.857966	0.611476	-1.41788	-0.483594	-1.16146	0.5751	1.22664	1.64595	1.58685	1.12026	1.99142	-1.03284	-1.18451	-1.14497	-1.20601	-1.18542	1.77755	0.210602	1.71903	0.206868	0.217562	-0.278817	-1.46286	1.04083	-0.579329	0.354714	-0.298529	-0.72273	-0.331348	0.563097
4.36_822.5651m/z	0.648306	-0.0218019	-1.08701	-0.652051	0.184744	0.744128	0.219539	0.830613	-1.11081	-0.129551	1.28184	-0.165822	-0.633316	-1.9602	-1.41486	1.03799	-0.926952	-0.904887	0.414901	1.31781	-0.088629	-0.782883	-0.11681	0.532969	-0.335135	1.73044	2.58975	0.833042	1.33791	1.77422	-2.35067	-0.785386	-1.0307	-0.690096	-0.649581	-0.0402133	-0.950628	0.0239462	-0.305623	0.494496	-0.262886	-0.478653	1.13224	0.560886	0.763805	-0.915956	-0.8402	-1.73385	-0.736353
4.63_798.5644m/z	1.35877	-0.582941	-0.511124	-0.726527	-0.407826	1.30059	0.851438	0.595393	-0.752059	-0.8601	1.34449	-0.810056	-0.746186	-0.582079	-1.26596	-0.118138	-0.817135	-0.777818	-0.401052	1.37292	0.263393	-0.53937	0.441544	-0.944533	1.08216	2.35048	2.17954	0.563905	1.49564	2.19554	-2.1284	-1.51627	-0.309188	-1.04673	0.0932925	-0.357835	-0.60492	-0.543419	-0.34048	-0.119666	-1.09446	-1.03597	1.70337	0.534205	0.957824	-1.02399	-0.492875	-0.965274	0.134341
7.84_733.6229m/z	-0.552599	0.150342	-0.361728	-0.591424	1.2245	0.452881	-0.318488	0.425968	-0.764115	-0.351688	-0.369996	-1.09993	-0.985485	-1.28978	-0.972325	-0.692606	-1.60872	-1.32156	-0.799821	-0.00641478	-0.161699	-0.479265	-1.82682	0.30595	-0.370157	0.612801	1.95444	1.74265	2.0034	1.88266	-0.82216	-1.26689	-1.66253	-0.463117	-0.376006	1.13901	0.438394	0.248481	0.789292	0.621255	0.0907264	-0.243991	0.72134	1.31848	0.905031	-1.37258	-0.165379	-0.0105245	-0.753521
6.55_732.6098m/z	-0.787304	-0.338845	-0.46597	-1.43513	0.422782	0.731522	-0.442272	0.0822697	-1.12747	-0.377371	0.00678209	-0.176518	0.166721	-1.79207	0.858405	0.17835	-1.32768	-1.24939	-0.0646629	0.744828	-0.402703	-0.656128	-0.960166	-0.902877	0.521591	1.48114	1.43285	1.768	2.64407	1.30415	-1.39474	-1.87952	-1.89638	-1.22981	-0.745682	0.971147	0.522837	0.0873921	0.655091	0.186517	-0.640118	-0.000746412	1.46367	1.43345	0.597719	-0.722876	-0.349543	0.364854	-0.952835
8.33_835.6668m/z	0.241944	0.150094	-0.900509	-0.555083	-0.160207	0.438578	-0.233731	-0.319341	-1.21683	-0.372177	0.390703	-0.513571	-0.0912515	-1.65016	-0.330461	0.113706	-1.23715	-0.98912	-0.310822	0.545614	0.195738	-0.895124	-0.895999	-0.0987229	0.866724	2.19831	2.27044	0.998757	2.406	1.8154	-0.652519	-1.6875	-1.13432	-0.797391	-0.710241	0.682564	0.784162	0.63207	0.294657	0.116463	0.0646018	-0.962524	0.448456	0.554594	0.452869	-2.00558	-0.403365	0.175744	-0.740451
5.83_805.6215m/z	0.312582	-0.279249	-1.27628	-1.61956	0.167666	0.74112	-0.757257	-0.381629	-0.623284	0.283575	0.267814	0.623559	0.558606	-2.66059	-0.657198	0.66521	-0.361358	-1.73655	-0.629938	-0.39922	0.364083	-0.0313714	-1.32097	1.7671	-0.0396929	1.80152	1.50779	1.80325	1.98229	0.876948	-2.38789	-0.867435	-1.11678	-0.372562	-0.798729	-1.00509	-0.19666	-1.0187	0.476869	0.134716	-0.130444	-0.758965	0.994581	0.751671	0.998409	-0.505933	-0.659324	0.126692	-0.206366
5.39_779.6051m/z	0.401659	0.63722	-1.72327	-1.23195	-0.30936	1.23333	-0.653093	-1.41481	-0.825203	0.300649	0.0528109	-0.322891	1.18517	-1.35717	-0.32864	-0.381265	0.0848407	-0.882012	-0.0742435	0.0458304	0.446132	-0.980688	-1.23464	-0.0765552	1.18085	1.45243	0.971342	1.72983	2.46092	1.0437	-3.05464	-0.907434	-1.17371	0.113183	-0.642494	-0.566124	0.716518	0.0921468	0.582627	0.799564	0.332266	0.421231	-0.0405176	1.06973	1.20171	-0.654495	-0.164255	0.66951	-0.467226
6.95_807.6374m/z	0.601174	0.309913	-1.26919	-1.56223	-0.564966	1.21784	-0.822302	-0.458439	-0.802912	0.115969	0.748306	0.498887	1.17604	-2.28164	-0.110403	0.155765	-0.530453	-1.21915	-0.706649	-0.380762	0.203312	-0.293874	-0.986381	-1.19648	1.43278	2.18747	0.677424	1.79092	1.98562	0.884908	-1.50776	-0.851898	-1.30501	-0.418762	-0.69919	-1.61219	0.233724	-1.13687	0.94651	-0.0396299	0.449315	0.322173	1.07826	0.944146	1.0089	-0.552159	-0.644339	0.43283	-0.252489
[truncated: 11 more columns]
