# Supplementary material for: Lipidomic profiling reveals distinct differences in plasma lipid composition in overweight or obese adolescent students
Source: Research Square preprint supplement (doi:10.21203/rs.3.rs-33013/v3), 2021-03-09
Supplement: Supplementary file 4 [file c5598ccc598b95de240166b1.xls]

## Sheet: Additional file 6
mz	control_6	control_9	control_12	control_13	control_15	control_19	control_22	control_25	control_29	control_32	control_35	control_39	control_42	control_45	control_48	control_52	control_55	control_58	control_62	control_68	control_72	control_75	control_78	control_81	control_85	control_88	control_91	control_95	control_98	control_101	overweight_7	overweight_10	overweight_17	overweight_20	overweight_23	obesity_26	overweight_30	overweight_33	overweight_36	overweight_40	overweight_43	overweight_46	overweight_50	overweight_53	overweight_56	obesity_59	overweight_63	overweight_65	obesity_66
0.38_1148.5185m/z	75206.2	11658.5	9118.95	13936.8	11746.3	31219.8	28.4028	11374.8	2905.31	36506.5	29813.4	7441.69	10943.8	20957.5	22030.7	146678	50490.6	7176.25	59267.3	146913	169046	218257	1.354e+06	2.38506e+06	4.98252e+06	578848	83920.6	32092.4	6548.69	1941.39	16979.6	15052.9	2135.62	104631	61.1792	6474.28	35606.1	1304.09	304.544	21797.5	5199.22	41124.7	1397.98	133260	79005.3	73704.9	10403	31502	12209.2
0.38_1589.4056m/z	21008.5	7936.19	17030	75881.1	53295.7	44878.8	54158.2	123656	449663	609067	149264	530011	446476	138527	233583	110321	593762	812730	127654	99393.7	134961	129675	202985	232771	214648	859089	144526	750272	9621.95	69206.9	112358	27668.1	48104.6	40726.7	79562.6	189809	169876	222058	389607	355907	69603.5	279156	163005	225913	182061	479887	37479.8	121885	143432
0.39_1174.3320n	692932	757462	515431	738566	565704	738801	749131	1.04357e+06	1.2675e+06	779573	606509	751224	638562	1.1746e+06	784626	456073	883226	458537	456527	1.04686e+06	516173	417514	169434	816850	510399	579694	621374	915967	275743	558401	922760	1.07537e+06	346668	1.14385e+06	122331	703612	926198	777046	447654	409427	1.0224e+06	606244	896056	885902	787356	366692	474325	249630	400271
0.39_1228.4241n	1.25177e+06	722552	739780	423560	897840	426515	1.16512e+06	1.40308e+06	1.1211e+06	960191	395269	579692	1.08908e+06	120428	868381	699391	599183	1.0894e+06	818009	1.02105e+06	830191	521685	834861	746072	456058	543101	992336	852016	629920	448812	1.07792e+06	666878	680148	858747	1.17585e+06	1.46699e+06	1.05379e+06	950291	1.05777e+06	669490	792940	927258	658362	785195	1.05876e+06	490022	394591	540885	594904
0.39_1242.9007m/z	1.01024e+06	918770	1.17983e+06	396835	141975	659953	286418	455944	262849	583151	250850	499153	296959	430594	108461	338303	209574	149617	178581	305023	107570	133502	181212	247015	340897	155735	202951	130108	205360	282818	467598	618775	718803	220102	287951	125034	191753	293662	440094	297627	389851	386436	443604	174108	388311	309557	342258	190395	182134
0.39_1246.0584n	1.11722e+06	1.01191e+06	653304	1.12454e+06	476278	1.32131e+06	1.24006e+06	1.17557e+06	878451	589040	465130	341737	674541	722589	624430	609372	875992	570742	510729	637910	311596	965105	782810	695798	528656	883517	1.10634e+06	453792	872713	510283	755492	544181	1.18459e+06	1.27181e+06	786356	506480	1.03945e+06	1.89062e+06	322800	615111	824874	980406	979424	740239	324127	1.19319e+06	769866	516514	326787
0.39_1278.7103n	664881	2.08491e+06	2.02542e+06	1.5273e+06	953788	1.35589e+06	1.22207e+06	882505	1.08072e+06	526356	458019	524146	739227	1.37735e+06	880710	899013	2.11152e+06	828410	772201	912799	773461	695318	475721	741964	1.09023e+06	559148	1.9685e+06	1.16451e+06	1.07018e+06	827508	1.4063e+06	1.24426e+06	1.33066e+06	1.28122e+06	828116	903077	592928	544430	539607	582475	956555	1.68399e+06	1.98965e+06	1.81171e+06	1.57288e+06	926599	1.00409e+06	1.04538e+06	1.24587e+06
0.39_1313.2421m/z	973487	587721	756030	684006	812538	1.47779e+06	1.61862e+06	2.16259e+06	2.14301e+06	1.99546e+06	1.53794e+06	1.35332e+06	1.10815e+06	1.06213e+06	985064	1.32201e+06	1.78422e+06	648206	1.30907e+06	1.33809e+06	1.44825e+06	1.9846e+06	1.35769e+06	687491	1.61999e+06	2.05853e+06	1.39941e+06	896615	1.0199e+06	1.08487e+06	999344	873952	1.65208e+06	1.6371e+06	1.18389e+06	1.69137e+06	2.21724e+06	1.34326e+06	1.44687e+06	933730	1.35067e+06	1.59058e+06	1.07741e+06	945956	1.27568e+06	1.43675e+06	988017	1.47173e+06	1.25254e+06
0.39_1337.8255n	1.1702e+06	1.54729e+06	1.068e+06	1.43233e+06	1.87943e+06	1.7105e+06	1.55506e+06	1.79419e+06	2.48964e+06	2.32319e+06	1.51009e+06	1.45995e+06	1.6955e+06	1.50286e+06	1.59497e+06	1.50313e+06	1.36213e+06	685853	471061	741989	971702	1.03939e+06	1.44462e+06	1.27437e+06	538801	1.28967e+06	791536	674977	506766	770262	1.87825e+06	995672	1.70635e+06	2.27651e+06	2.20286e+06	1.46978e+06	1.73494e+06	1.84284e+06	1.22256e+06	1.40297e+06	1.41469e+06	966353	1.20393e+06	1.15171e+06	1.11873e+06	561832	813012	675757	785042
0.39_1340.1438n	831858	791603	1.81008e+06	1.12433e+06	1.17765e+06	1.77864e+06	1.05175e+06	1.61989e+06	1.15354e+06	1.61611e+06	1.07057e+06	1.52251e+06	1.49128e+06	1.42063e+06	1.38698e+06	1.60487e+06	2.11314e+06	854757	1.45608e+06	1.59428e+06	1.3279e+06	1.65718e+06	1.29805e+06	999763	997560	1.12823e+06	1.12017e+06	918228	1.31126e+06	1.29652e+06	1.46443e+06	1.09501e+06	1.20418e+06	1.25725e+06	1.0637e+06	1.89227e+06	947891	956446	462214	1.08766e+06	1.16274e+06	1.25083e+06	964111	1.38617e+06	1.05688e+06	1.12194e+06	1.36055e+06	1.48071e+06	1.15555e+06
0.39_1502.7105n	491335	543226	860017	614993	1.08215e+06	468024	348666	1.37501e+06	1.47627e+06	917347	533796	1.15749e+06	952084	1.05794e+06	617362	388705	429007	915913	898426	648721	1.0924e+06	751853	795805	618869	561119	846662	511197	717041	419860	553805	876426	730116	1.11699e+06	1.59729e+06	174736	411941	794756	807981	654089	484430	564038	822606	703880	620278	924773	345429	769786	521870	637199
0.40_1027.3639m/z	52729.6	75513	17137.5	564.184	25280	47278	443046	414333	208984	125845	126259	21300.6	9804.15	7624.19	8340.46	12730.2	21546.1	3722.16	21701	12714	19608.5	48025.7	140053	67564	61673.2	49852.7	6380.15	13900.3	28500.5	15784.4	89385.2	33386.3	28112.3	7819.06	112132	249490	149038	498035	34054.7	12140.9	8081.63	8171.8	6576.04	16482.4	28460.5	25007.7	45832.3	14386.6	12975
0.40_1224.1449n	504038	338545	312041	238967	398982	475195	537216	338003	356451	370768	549192	369026	385531	293364	131142	477118	471983	608909	660567	346353	96313.9	586938	492328	313919	296563	192952	399771	408631	255192	214316	753595	219567	720593	601456	649290	238103	272951	351367	396087	324671	381711	951253	526660	346213	208227	370787	81068.2	92503.1	280672
0.40_1284.0739n	1.53872e+06	1.67491e+06	1.5079e+06	2.42605e+06	1.351e+06	2.22909e+06	2.13121e+06	1.90698e+06	1.74552e+06	1.82008e+06	1.34157e+06	1.05248e+06	1.61545e+06	1.59294e+06	1.10362e+06	1.07586e+06	1.9366e+06	1.00583e+06	1.91735e+06	1.10314e+06	1.15049e+06	1.22575e+06	2.20083e+06	1.4077e+06	1.59927e+06	1.86924e+06	1.40034e+06	1.59434e+06	1.55133e+06	1.07968e+06	2.14829e+06	1.5258e+06	1.96174e+06	1.995e+06	2.20541e+06	1.73792e+06	1.65213e+06	2.98787e+06	1.76931e+06	1.49765e+06	1.73789e+06	1.70232e+06	1.56329e+06	1.53583e+06	1.20608e+06	1.07647e+06	1.38523e+06	1.62074e+06	1.42211e+06
0.40_1324.4442n	1.94149e+06	1.88286e+06	1.94885e+06	2.99575e+06	2.23294e+06	2.47977e+06	2.33791e+06	2.30246e+06	1.48411e+06	983523	1.65518e+06	2.059e+06	1.82996e+06	2.3126e+06	1.3985e+06	887129	2.29239e+06	1.9535e+06	1.52365e+06	1.06229e+06	2.17043e+06	1.6156e+06	1.95645e+06	1.46168e+06	1.2653e+06	1.64404e+06	1.93733e+06	1.33181e+06	2.2332e+06	1.05698e+06	1.44888e+06	2.65739e+06	2.07966e+06	1.90727e+06	1.54262e+06	2.31097e+06	2.22154e+06	2.50254e+06	1.48939e+06	1.43682e+06	1.89983e+06	1.86502e+06	2.02407e+06	1.50403e+06	1.22604e+06	1.40403e+06	1.40195e+06	1.56581e+06	1.89976e+06
0.40_1343.6874n	928710	1.42702e+06	1.36854e+06	1.52471e+06	1.25921e+06	1.34986e+06	771969	1.67328e+06	1.32656e+06	1.51477e+06	947750	1.27617e+06	511472	1.04281e+06	1.0652e+06	1.14771e+06	1.23903e+06	794631	1.12792e+06	998517	1.11276e+06	1.04738e+06	1.4145e+06	850779	823409	1.034e+06	958444	700165	836012	761523	1.04306e+06	1.3381e+06	1120998	1.55289e+06	807177	887863	1.26541e+06	1.47679e+06	1.50588e+06	927391	815685	1.81284e+06	708111	1.1724e+06	1.0494e+06	900869	1.161e+06	722373	872294
0.40_1371.9388n	1.07685e+06	1.3414e+06	1.64024e+06	1.07781e+06	973943	1.36991e+06	700764	696263	1.03827e+06	992934	681385	732750	861412	330913	811196	592355	873251	634027	841317	805889	701460	1.15065e+06	539731	469452	247809	765915	546326	714566	529558	682446	1.61334e+06	780993	1.04736e+06	1.15081e+06	601273	1.18854e+06	485178	774346	372016	498224	931255	701815	702929	459641	837307	626657	997381	541298	653800
0.40_1378.0756n	737654	759746	809565	1.2587e+06	1.06315e+06	1.09349e+06	1.00212e+06	1.31004e+06	2.2294e+06	1.03186e+06	1.31001e+06	841039	313373	1.0392e+06	1.4239e+06	832030	1.45424e+06	719888	257968	1.04096e+06	1.22961e+06	838745	1.69883e+06	753419	1.24852e+06	1.28798e+06	800494	1.40039e+06	803131	1.44691e+06	823383	633889	1.27886e+06	1.04603e+06	909692	948935	1.07369e+06	1.73098e+06	914990	711208	1.02289e+06	906241	1.29699e+06	1.30883e+06	989188	1.02794e+06	1.12426e+06	931532	1.11765e+06
0.40_1435.1968m/z	199456	254365	176175	155607	180597	74047.3	210144	69858.4	410045	242614	458022	251005	610774	62977	204881	103831	77750.9	24062.9	169047	584501	493769	926463	417346	729329	765112	50763.2	47308.9	33996.4	79568.9	168839	262687	215617	56373.4	85256.9	171118	133872	358347	27369.8	228521	221366	484395	299525	251116	259792	24599.3	52933.8	135897	355195	465424
0.40_1589.2645m/z	207370	212027	4531.31	124495	249195	7.41599	75188.8	74162.1	131959	65568.4	4272.52	161884	85479.1	27983.9	180234	227297	5496.96	259406	127424	320836	322483	90263.4	76184.8	70750.7	153504	126091	38173.9	60175.1	58.0592	16495	74997.6	213158	41736	65318.1	187707	159456	164515	110118	54051.2	173499	119525	167963	174939	15161.3	1856	139461	114974	272608	262938
0.41_1113.4533n	41768.5	38.3453	179520	98029.6	268306	786459	422939	1.60154e+06	1.22237e+06	546128	95295.1	48944.9	35702.1	15935.7	69410.2	88987.1	12116.1	60592.3	38848	59686.5	70768	235063	50777.9	841466	261929	66678	217254	106840	42422.6	39842.3	52016.7	101986	186286	510835	1.63803e+06	1.1032e+06	1.19726e+06	191542	55884.1	5993.79	1064.87	17083	44106.5	46740.1	24795.4	37226.5	13627.6	90631.4	65047.3
0.41_1124.8567m/z	142886	105936	262313	4822.34	197816	144690	32234.9	1236.68	42807.8	26284.2	64786.5	44832.9	51136.5	58088.1	42726.8	45228.3	30051.5	22771.5	15921.7	13936.6	20887.6	27403.9	20353.5	120336	101806	127002	57954.1	43488.3	74016.9	51215.2	88749.9	107894	3016.88	84093.8	91199.3	68228.3	29747.3	15147.6	43810.9	47565.3	51875.2	1611.03	74416.8	39659.7	36490.2	30929.3	36608.5	15937.8	20231.2
0.41_1238.9417n	1.45496e+06	1.23629e+06	1.48872e+06	1.06831e+06	1.08968e+06	751375	551337	717203	612091	517435	819072	878319	788532	682142	780278	803680	1.01122e+06	1.06337e+06	818194	768393	894567	569007	1.40436e+06	1.29289e+06	854663	1.28824e+06	1.49154e+06	1.29644e+06	1.20171e+06	389708	1.5618e+06	1.24231e+06	834842	614350	558411	641199	792671	417398	903653	1.08821e+06	647516	744638	852021	1.30149e+06	941133	425183	697398	850844	478820
0.41_1258.3632m/z	285580	251999	491436	398118	293749	319189	612040	303540	496157	151996	216010	302159	68110.7	130925	168254	129849	232950	118387	85646.1	244589	209306	56082.9	151717	142114	234737	435815	446428	455264	222340	271708	235397	244887	364494	467458	444995	203423	256047	305958	178363	494672	124829	63860.2	362796	304406	265528	146478	118558	131291	151574
0.41_1262.1295n	775362	1.06138e+06	1.34445e+06	747046	603359	1.09251e+06	996989	248364	1.17329e+06	568986	735913	621572	793230	1.00697e+06	687935	548324	614729	781338	601021	1.16019e+06	382506	802054	998135	588845	990880	272678	734913	1.27473e+06	602709	1.01005e+06	788749	1.14621e+06	999818	941927	941130	999782	789862	590171	344965	1.00424e+06	672291	729234	910661	420487	553230	368737	610990	489977	411271
0.41_1375.4780n	1.21008e+06	735789	1.77578e+06	1.24458e+06	1.08627e+06	1.66802e+06	856778	1.19966e+06	995849	924415	787558	804427	723572	532575	642001	866213	1.25193e+06	813746	1.16201e+06	544340	657817	796728	1.12525e+06	2.06201e+06	1.24017e+06	1.34719e+06	1.0797e+06	247794	616349	615402	1.30878e+06	1.07573e+06	1.43007e+06	1.44125e+06	1.19686e+06	1.30389e+06	936869	1.22028e+06	734617	571059	787137	369134	714020	1.01416e+06	963598	513112	513011	724614	314139
0.41_1397.9214n	850966	981282	1.58572e+06	1.83891e+06	1.22869e+06	1.04297e+06	1.20977e+06	981302	1.12124e+06	197369	873124	752976	1.09797e+06	1.05631e+06	1.24437e+06	1.01858e+06	557873	1.00023e+06	298492	1.02624e+06	1.25063e+06	992996	873238	874264	803097	1.20974e+06	999504	734163	1.15236e+06	1.06284e+06	1.50529e+06	883289	1.16591e+06	1.76166e+06	1.30852e+06	1.39435e+06	1.74982e+06	1.04952e+06	965367	840964	1.09072e+06	1.07429e+06	480685	889305	735138	904087	840351	892403	399985
0.41_1524.0924n	856191	513334	363588	146742	240743	271096	120863	272406	653080	730509	311937	786323	910233	515959	532330	698408	767439	140946	452697	852012	342861	247534	314037	743748	572550	344988	206083	230291	207133	425099	968377	500919	297076	187229	235022	238842	342252	728670	548353	643485	1.19561e+06	881572	336955	535898	291827	587415	594979	359718	97047.7
0.42_1102.6791n	544812	443505	616321	147955	277174	85382.4	168143	103360	136812	53806.5	276996	380647	693646	260268	715675	787881	520297	153094	3563.23	202230	140812	73126.1	224678	236730	79076	169878	304058	90954.9	266563	208266	516043	357357	290742	179087	285209	149493	225603	103284	210370	123206	261889	281270	290272	358048	504036	200030	317218	402703	200837
0.42_1177.1320m/z	148375	65054.5	91409.6	112010	112039	16567.9	72361.8	29287.3	172120	84333.8	102155	249454	399964	108439	211562	37037.1	103113	43339.8	47956.9	24510.3	22908.4	26609.1	67802.1	152128	720108	821006	627273	622375	340588	372609	25591.9	33621.8	71789.9	136545	63618.2	50478.9	81401.1	90950.6	51669.9	57061.1	38300.7	100887	176298	40041.2	53387.1	37895.1	12406.7	15679.5	25947
0.42_1267.6397m/z	337226	339473	242747	741953	505355	450321	838534	461543	497738	783483	551597	395009	155552	574697	600235	723716	430724	727733	252096	876923	901680	595600	293066	232606	524466	442977	1.00364e+06	1.95175e+06	1.73068e+06	731880	557877	274474	764900	1.29904e+06	897466	777195	495717	631995	551532	436309	212047	113434	334315	477795	391482	260094	352084	988752	856985
0.43_1170.3493n	1.01185e+06	626724	568300	876131	711759	606973	467170	629448	850980	1.00659e+06	1.08242e+06	725853	1.21144e+06	812334	641071	975343	375389	281544	280322	300359	354744	337709	1.06937e+06	768367	715043	1.14532e+06	1.02259e+06	2.51213e+06	1.57115e+06	751036	676136	577533	575944	842475	497128	660168	918371	691805	829865	1.24137e+06	1.15054e+06	905119	549433	630864	248612	283834	289248	392193	162484
0.43_1304.1536n	652616	166336	59348.5	153839	136075	42370.2	47786.2	129057	256009	566630	1.17323e+06	198755	464861	258339	231253	831716	6.2826e+06	6.80065e+06	4.15153e+07	1.0494e+06	373029	59701.1	115856	87254.2	367588	496917	312079	1.22514e+06	104836	311337	638866	92823.1	59293.6	141078	64625.5	72042	449766	366507	1.67341e+06	455694	393194	252851	434858	2.97419e+06	375668	9.13527e+06	2.76635e+07	6.57327e+06	4.60554e+06
0.43_744.6184m/z	56507.1	74216.5	121282	245767	276249	186206	249522	227937	61750.5	34999.5	39737.7	20341.3	86023.5	100422	1.06294e+06	419552	193960	72239.1	163730	48035.8	50252.7	165374	402112	1.03146e+06	1.60563e+06	604621	1.73398e+06	172199	332840	135383	95521.5	64702.1	324460	248838	172727	139201	39097.5	44989.2	69048.6	114507	144950	27746.3	90327.9	369586	169882	41660.1	57247.1	31072.7	71597.8
0.44_1005.8507n	236431	218818	175178	290146	391533	85123.9	61851.9	112146	153003	456740	156576	590368	91466.9	109822	97658.3	44436.6	34124	357891	290365	379697	370454	145936	395447	641066	912870	57502	397232	111379	37140.7	14519.3	333639	79839.6	163104	171749	118135	16375.5	309736	87498.9	150534	358958	242600	66812.2	19840.1	119463	293644	234180	179681	291996	132521
0.44_1191.0178n	454202	681726	866045	388199	838250	290030	412620	284952	421335	606140	755349	729317	443527	271761	333714	280588	288588	218276	133512	856314	238849	1.09016e+06	771762	1.04067e+06	796657	342016	216389	383174	52761.7	254188	682982	464867	558312	166222	297817	190173	470649	888320	936563	714897	713180	526569	261258	290109	284253	80327.4	448222	231347	486040
0.46_1567.5633m/z	8.45499e+07	7.19222e+07	86796500695	212198000000	5970824447	109535000000	2.34585e+08	2.39762e+06	86493.9	32791.5	1.34809e+06	148401	116579	65957.5	1070.38	21013.5	1.22466e+06	1.3546e+06	141985	1.41291e+07	2.90425e+07	2.75368e+07	2.34282e+07	1.55696e+07	1.57927e+07	1.50554e+07	923610	1.88021e+07	1.87246e+07	9.66173e+06	1.42022e+07	417822931	309996000000	45399152493	1301671694	3.24857e+07	150835	1.41653e+06	1.44828e+06	55270.8	187631	2.3412e+06	1.59902e+06	1.29026e+06	1.22429e+06	1.29467e+06	3.81114e+06	5.23307e+06	7.98479e+06
0.48_1375.8605m/z	154665	94390.4	328843	239774	161451	47235.9	28930.6	28817.6	107639	2.77198e+06	3.10119e+06	5.93448e+06	2.12435e+06	21547.1	169958	85355.3	28215.1	59810.4	83248.2	561996	250345	96447.3	44283.3	14462.3	20902.3	11610.3	65954.3	6982.28	74528	90092.3	100057	147946	92901.4	5532.85	25083.1	14845.6	159640	1.19293e+06	3.3835e+06	6.82272e+06	2.26537e+06	265057	51802.5	28747.4	32898.4	104728	128781	454520	245848
0.49_680.9244n	84576.9	117165	33436.6	79443.3	91364.7	333447	72498.5	168633	175483	130220	313724	27825.2	60575.3	88015.2	51124	47390.4	14202.2	151539	69957.7	113662	117707	69664.3	44120.4	49325.8	70140.1	74044.5	31385.6	36617.8	75357.4	44355.8	76467.4	82903.8	70664.1	187420	185229	78827.1	430517	127240	20575.9	41103.2	38984.4	62653.3	41274.5	48256.9	41064.8	199825	71388.5	74579.6	205942
0.50_1035.2521m/z	48601.5	53978.5	68612.5	80513.4	137663	120330	57589.8	34408.6	74722.1	38938.2	51102.9	93897.6	122182	69191.7	85027.4	111172	103290	35473.5	35921	36962.5	33658.9	63874.2	225167	391601	547264	305713	185255	97288.5	3117.08	92773.9	30271	58586.2	129494	213415	103930	289.765	32155.8	18863.3	30880.2	21336.2	11011.4	97819.8	54644.7	71485.6	57524.2	13183.5	61596.9	71603.3	66838.2
0.51_905.0720m/z	168095	255132	590775	1.30183e+06	552604	1.10165e+06	472860	525808	217115	72362.1	97472.3	81200.6	218342	226942	397838	301174	404558	246245	208702	125069	51889.8	155388	117577	136919	57406.7	37601.1	103573	113434	4786.95	123529	243505	475380	1.22103e+06	867788	508288	312548	227942	106010	25750.6	111702	314171	219034	280353	204187	293992	77152.5	247924	198507	44361.2
0.51_996.8821m/z	21284.4	57260.4	16637.8	41804.1	13717.4	24370.8	38175.7	12294.5	68034.9	36580.7	33087.8	37344	3898.57	63373.4	120821	102501	60555.9	41483	32708.2	37559.1	26572.7	13912.8	7783.47	21650.1	56353.7	741073	2.86936e+06	2.10579e+06	515974	99681.9	23230.6	15592.9	26873.3	54104.1	34084.1	10167.8	21912.4	35179	32414.8	15692.8	69709.8	13588.3	61704.3	91532.5	68594.4	40209.4	32781.2	37596.8	31840.8
0.52_1048.9995n	124634	38567.4	14101.9	98768.9	149995	1.38789e+06	73290.7	7.677e+06	8.83196e+06	5.24615e+06	1.43411e+06	150091	13198.4	10022.7	227118	29849.4	111641	963070	361863	222547	429578	129205	32837.4	20206.2	19393.1	39918.7	50398.5	263642	96876.1	86632.7	34604.3	29925.6	393275	855372	8.24582e+06	5.35791e+06	5.35093e+06	1.78027e+06	246731	85164.5	108742	18238.5	150814	313937	243935	864566	328429	328079	223548
0.52_1127.2094m/z	86096.2	51556.8	44166.7	28442.7	73718.3	283391	161536	399106	467183	151024	203350	79633.1	187050	188215	310649	358439	263867	458191	267207	956044	272982	129911	228968	551880	341560	294700	325850	1.1548e+06	1.88848e+06	1.259e+06	51548.5	44085.8	190305	936421	582850	335885	193262	199712	131709	38828.6	76767	265450	488868	95776.3	235369	180273	152818	232090	1.01927e+06
0.53_1244.2967n	1583.33	134075	225658	65072.2	93844.8	89401.1	158430	90496	140804	52792.5	43863.1	79012.8	159651	280519	74758	89468.8	240309	562988	1.00839e+06	450428	904825	444456	641186	452343	683706	144412	416514	126443	250876	66249	196954	83513.6	64903.8	108244	150134	156990	70321.7	3030.51	129675	66946.7	227362	98485.6	227603	311722	197469	365914	453493	834845	435194
0.53_1337.0756n	58566.7	129591	15634	269246	513130	70240.2	837046	430706	292356	164217	94351	109689	154257	93650	100526	87085.3	148193	1.17424e+06	668915	452546	328823	200353	98330.6	103430	116900	65180.5	122551	90559.1	51643.2	46569.2	143225	27002.3	778184	711757	419560	448803	236208	211596	75117	96725	67430.8	27372.4	280869	200978	153338	564467	374654	101955	335836
0.53_835.5268m/z	88358.1	137552	57016.6	231686	198009	78351.8	79448.8	164301	17962.4	221724	29692.3	112893	16104	17640.1	31032.1	14483.2	22375	38000.3	16276.1	13730.2	14198.8	6814.47	32600.1	42570.5	37539.3	140408	90365.4	37655.1	34671.1	37120.1	20376	149853	72092.8	102064	122333	44597	182516	51909.6	87475.9	78897.7	102850	48016.2	22558.1	109871	23240.8	41262.1	59407.3	75069.6	42056.7
0.54_1171.9547m/z	13951.9	11786.9	3347.12	150570	117736	124149	452752	43925.1	251623	187261	121755	197319	175125	356878	49720.5	139855	68465.5	134352	61731.4	86004.1	139712	260925	152010	116616	47526.2	67562	40852.6	22766.4	21946.4	52662.9	81363.1	152146	133975	60257.1	67053.1	108243	12622.2	315896	136681	152807	56579.9	129613	34158.7	106783	81579.5	142077	62820.2	215048	90394.3
0.54_1211.4500m/z	13138.5	54952	39498.1	125876	43258.9	81616.7	40035.1	224834	108743	80030.8	94569.4	48101	34555	8707.05	70837.8	42045.9	44100.3	121635	152298	89848.9	131921	102703	48904.7	175521	118651	132267	51868.8	1389.31	8296.02	9570.19	89961.6	33329.4	25457.6	13787	72999.3	71373.2	74798.2	218012	30665	5766.48	41090.2	16500.4	147773	75827.6	2592.44	34612.4	55173.1	27956	51507.6
0.54_1255.5290n	343590	188946	492892	274198	218859	169633	63051.1	20500.1	122582	40172.4	123002	110577	87119.2	90137	65394.9	209542	257412	255173	201799	504986	343134	191362	199458	210227	371919	334511	274517	231335	371204	230885	195619	144420	297650	186797	154151	209475	272315	180484	401746	275665	135780	94584	405160	398432	261483	192770	181280	233090	272217
0.54_1265.2207m/z	11142.9	10287.3	51876.6	79845.8	122991	96264.7	31809.7	139783	187699	99928.1	64270.7	78504.1	9271.63	17746	41618.8	38439.7	16246.4	84007.2	26662.5	27441.8	26820.3	47782.4	97855.5	51351.7	93261.7	254594	93149	61391.4	49098.4	34061.9	47872.4	18059.5	142929	104984	12956.8	79335	250631	53913.7	27880	41394.6	30682.4	23401.2	3919.04	22969.3	27641.9	44591.3	86519.6	33779.9	89702.9
0.54_1375.7992m/z	11592.9	17413.4	18951.4	36548.5	15626.8	58945.2	62.2546	17795.8	141529	160810	18931.3	380487	188126	171367	64844.8	770.232	12249.3	36126	29152.9	40293.2	14738.4	9057.16	8262.56	9949.66	51037.3	196595	99783.7	59439	118196	27052.6	6144.57	23341.9	50886	36042.5	28572	127776	56925.4	190263	279735	2.4887	103507	11610.3	30503.3	15730.4	29663	5556	34491.5	44393.8	12380.2
0.54_752.9801m/z	110925	143422	81106.6	89313.4	123003	155380	48727.7	94576	154125	143887	101009	67542.1	140662	94877.7	92791.8	63668.7	151555	71342.7	79945.7	72349.2	112274	167769	94391.4	89987.1	98811.9	56010.5	160218	105236	118308	95602.5	117451	122312	158440	158683	136922	104784	112184	104126	134003	92091.6	80016.4	44035.5	97571.4	126678	98487.8	45249.3	126955	59676.5	68040.5
0.55_1350.2411m/z	55373.5	32718.7	51594.5	50985.7	42689.9	21725.1	32785.2	33570.8	27377.3	30973.1	14314.5	72285.3	25162.4	47786.2	63924.9	76515.5	94240	370477	39869.7	258096	230261	135721	27287.2	105537	82895.9	35046.8	7456.2	7168.64	26685.1	45579.9	113255	68386.3	2904.78	48840.8	49165.3	9417.33	15861.6	25402.2	11752.1	6260.04	25044.6	101204	37436.7	65955.6	26611.7	24817.7	146552	49509.1	156634
0.55_142.0628n	4909.75	4681.68	10165.8	14199.2	16576.6	47914	13211.6	43792.1	5711.61	25706	12233.7	8423.64	13418	6578.59	16576.1	23869.4	26469.6	3389.72	8113.32	52999	54268.2	16666.3	19624	4666.62	5801.19	22900.9	14442.1	6118.19	2064.02	22521.6	4718.56	3253.77	9345.8	11647.3	12140.3	56734.4	6395.2	11806.6	9322.65	12603.1	20834	50853	7367.81	11644.2	54756.6	6826.18	7281.92	7981.91	20216
0.55_158.0686n	9465.81	7678	10305.6	9922.95	8825.99	10534	10364.7	13529.8	17852.3	5331.87	16810.6	3542.85	11766.8	8733.01	5777.67	10267.3	9883.61	9194.92	1391.96	4275.86	8190.01	10311.7	7667.51	7574.75	4382.89	10378.3	7790.96	13455.8	12823.6	6374.38	7476.59	6221.54	5462.04	9668.13	7042.27	8140.94	6641.57	14265.1	8943.99	9733.9	3877.74	5683.79	10019.6	7089.9	12629.7	11319	12660.5	2287.24	8996.23
0.55_229.1178m/z	23697.2	23609.5	18860.6	12651.5	20318.1	20740.5	24222.1	16294	21410.6	20953.3	20817.6	11144.2	6926.3	30365.4	17267.8	5293.21	23017.3	28635.6	6003.09	24206.3	21359.8	31214.6	31181.4	8092.72	6912.93	15899	16157	11268.2	11169.3	6551.24	13147.1	8608.65	7870.66	10242.6	13237.6	23963.9	15048.9	22648.1	7636.13	40757	16798.1	15601.5	10184.4	14130.7	22507.2	31069.7	27459.1	18885.9	31254.1
0.55_258.1098m/z	9849.29	20679	12976.8	41078.4	71641.5	29992.9	26503.1	17163.4	27739.1	19328.8	23902.8	20680.4	23175.2	12141	16493.6	14374.5	14568.4	19379.2	14569.9	23382.2	17004.2	20965.2	17603.8	11543.9	19822.1	17754.4	9551.97	9732.09	11584.9	11740.9	14862.8	17622.2	22158.3	25169.2	37574.4	20125.8	24134.2	61162.8	27698.4	24758.6	29265.3	22406.6	15451.6	16311.9	24659.8	14211.3	14678.7	17850.5	5477.34
0.55_319.1359m/z	74604.3	53354.4	74660.6	79941.4	51032.4	85409.5	72824.5	70321.6	75424.5	36348	45248.4	46225.7	43681.8	60692.6	42727.8	47194.3	50887.2	35929.3	45425.8	39792.2	40362.6	38238.4	48335.9	29660.3	30964.3	28583.2	45825	26833.3	34049.6	24397.2	95425.6	67181	89564.9	52552.4	56516.7	65291.2	48902.9	78963.2	43437.1	54167.2	60290.4	54738.7	50781.7	45540.4	47097.2	56367.3	42539.3	46499.3	41869.2
0.55_430.7662m/z	12736.7	16253.1	8479.52	10670.4	26583.5	19569.9	19291.9	11726.2	15743.3	9973.57	5628.16	9720.76	8290.55	7514.24	4212.44	6162.91	10636.4	9330.57	11547.1	8886.74	5784.97	7914.87	43120.4	7964.86	11016.8	15265.2	6148.01	9490.3	4151.33	6645.94	17842.2	15433.7	22286.4	26439.5	1683.11	20824.7	11068.2	10450.6	10746.8	10442.5	8661.13	4628.99	11319.1	5364.54	5978.06	8153.02	8769.46	5145.62	6035.04
0.55_781.4742n	202556	286936	362213	229333	340799	152753	194037	117992	92930.3	117422	91621.7	88126.2	216124	136155	120635	163361	137098	78457.2	56134.1	157135	142764	108204	192414	121656	83161.5	75548.4	188686	100307	88233.7	46560	251075	200354	237027	284348	121767	129468	133559	117896	121690	77398	130638	82041.6	138276	111714	194791	103089	80717.5	127378	105019
0.56_160.1330m/z	47934.7	62101.9	54945.9	36588.8	69056.1	38029.9	54268.3	63841.1	30082.4	62075.8	59451.8	38612.6	30184.2	61677.3	42944	32305.7	54714.9	43191	44291.7	33250.2	74049.9	30382.4	47868.9	39730.4	51310.6	60784.8	13224	41155.6	34558.3	63249	45181.4	32920.1	39122.2	55030.7	29509	37250.2	25249.4	64716.6	57962.4	61476.5	53339	32068.8	36501.1	35188.2	34586.7	57456.5	94863.3	68158.1	37316.2
0.56_166.0841m/z	24854.4	55576.2	222556	120147	83706.2	286005	224531	260586	166491	202718	74370.4	184088	276105	154647	241626	250577	219141	12895.3	138858	459637	457604	72841.8	139530	20421.8	305383	247170	8692.36	187550	43063.2	257388	13393.9	12978.4	81893.6	158471	21048.5	472890	135767	87469.3	59035.1	111187	375063	610609	46720.9	262462	358246	105951	72537	18686.5	183617
0.56_256.8204m/z	25684.5	18365.7	13179.3	32476.2	23617.5	26986.4	32940.1	27887.5	18203.8	15977.3	24926	24693.7	22737.9	29975.7	28105.6	16752.7	25976.1	23534.4	24920.1	19345.7	23718.2	17693.6	14104	19822.1	25366.9	31403.7	41964.1	38109.4	32619.6	23921.3	22947.5	21898.3	27291.9	31680.3	28576.6	18394.3	40032.8	17341.5	29015.9	25738.7	19548.7	26815.4	30728.2	26982.1	11217.4	20088	23948.7	24316.6	11233.6
0.56_257.1474m/z	2686.54	6868.79	6473.98	59.0369	7786.6	6162.63	4607.16	4921.11	14284.9	9786.15	12608.7	22779.5	30776.7	26106.3	12773.6	3623.95	2321.26	4077.55	4056.47	7081.38	6543.84	7505.75	6983.36	0.183756	9241.23	2014.6	110.23	5958.53	5353.92	6610.93	1698.77	4958.38	7200.51	7840.64	4490.23	7003.82	6891.82	733.249	13712.9	18179.1	23115	8690.14	5425.12	3943.29	103.644	11898.9	2748.91	209.432	6427.35
0.56_291.0702m/z	1963.51	5429.87	4591.03	12815.4	4157.86	1571.93	15778.4	4750.71	13980.6	2971.3	10306.8	8891.89	23185.8	4951.83	8443.15	6584.91	7889.41	1320.98	10301.2	1567.67	1280.56	2647.86	2678.36	2145.64	3325.96	1380.17	1510.79	14803.6	7115.14	3541.84	7444.46	2191.28	3418.68	3058.19	3350.09	1994.88	7799.03	2091.25	18172.1	16999.8	10578.1	2456.12	14334.4	1147.56	5229.41	6656.33	22575.7	1124.68	2229.74
0.56_440.7505n	86758	80939.3	101543	92797.3	102976	65584.3	114137	121590	74421.4	101256	67713.2	72826.8	139953	116365	105024	66942.3	53237.9	129554	104963	84111.2	49237.7	47054.9	66894.9	75801.2	68911.9	94351.9	83977.3	64756.2	56504.9	60942.7	68206.6	50438.9	108626	148791	61809	88865.8	87885.3	56625.7	112937	95529.3	89512.5	100570	112138	101308	82182.6	134755	89250.6	78313.5	68174.1
0.56_462.7763m/z	11053.2	16151.6	6900.62	6673.4	8242.55	11924	8577.97	11732	7964.15	6893.25	3275.85	7132.37	4488.54	9475.74	5267.84	5859.9	4581.56	5466.06	7181.7	4354.72	4526.28	4227.55	3062.52	5559.54	5451.35	5006.24	5722.76	5937.47	4243.49	7235.21	7453.54	4273.6	8256.02	9820.29	12319	1723.96	7494.83	7548.15	1736.75	3660.64	9090.56	7028.35	4241.31	5009.31	5856.03	5336.55	4664.84	7428.15	5138.18
0.56_561.3205m/z	50410.6	41343	59784.9	96846.3	50107.9	116297	66413.4	91702	75755	53588.7	49259.5	46587	40543.3	128373	59475.4	57601	97817.4	47648.1	59211.6	46274.6	72550.2	78593.9	59865.4	53325.8	62991.1	59441.3	133001	79277.9	66629.1	47918.6	98641.7	80357.3	67460.7	87578.3	77135.4	48402.6	46319	55823	57141.9	60839.6	93068.5	92137.3	81019.7	68815.5	51541.6	93098.6	92052.5	52737.4	69323.2
0.56_611.8480n	56127.9	47135.8	49945.3	53225.1	43496.4	50765	33721.3	48744.3	32587	26874.6	38316.9	36129.2	42686.8	54529.8	32407.7	21131.6	46359.8	36446.8	43742.1	16640.9	39517.3	26484.6	31014.9	34998.5	30843.7	32712.5	44011	41618.8	24969.7	43371.6	34295.7	57320.8	50743.8	24246.5	48172.5	28008.2	35026.7	53488.1	62733.6	42650	53357.2	32510.2	37993.8	41608.4	36354.2	27963.4	54676.7	38967	23253
0.56_664.3958m/z	349459	328936	293069	369260	304442	367364	274904	311496	296273	287151	200331	362454	409126	313677	301888	256750	283615	244090	278200	198615	259171	222766	182168	317971	245820	322001	500915	333432	333285	282979	381828	326037	296845	328071	198679	255303	275851	254901	369574	382157	340484	340803	269812	258227	274552	249960	276801	219662	321842
0.56_719.9300m/z	222091	275204	314409	304992	276503	354851	282264	330277	259676	197775	211053	232197	302412	286211	229687	260760	246986	263812	274758	207068	245585	195228	179015	237325	252902	227606	332231	284087	248410	261318	270582	278000	305482	375264	235671	265418	246202	217696	303547	246087	234389	201989	245979	252887	314503	212071	230556	258483	295142
0.56_775.4119m/z	306823	299680	380771	433264	334224	388633	315337	402841	361777	280548	255296	218418	354928	337700	276492	278143	351406	284047	333508	261900	245852	282422	249157	278137	242922	288069	405539	294038	277894	280299	389023	333439	356573	484396	317954	338409	314807	276069	308993	314088	291739	303787	268246	289047	338920	270400	300168	308450	364061
0.56_819.4402m/z	329538	307523	379356	390795	333931	334984	278484	418846	343319	315508	275289	234229	362899	342144	305126	248869	295562	345928	338374	331309	289551	268678	286308	320162	253164	373659	522597	339083	380546	334261	401841	288199	336534	484753	272664	377424	317109	285877	332277	264628	298263	301009	284520	352547	362678	294473	314356	298081	437533
0.56_830.9994m/z	57457.5	87206.3	69462.7	79679.2	73114.4	79861	56895.9	62534.5	170818	138965	33766.6	154002	39267.2	66774	38145.5	57363.1	34015.4	51327.5	71635.8	56121.1	65218.7	100375	24025.7	112219	245362	663591	742000	587820	548430	242535	72984.7	60154.5	56952.1	24557.5	38361.3	148451	155357	62242.2	211552	145055	52341.1	52011.4	52832.8	34221.1	64070.1	66793.7	67045.2	74369.5	99281.9
0.56_860.5264m/z	1.48968e+06	1.30099e+06	1.3981e+06	1.49213e+06	1.26885e+06	1.56425e+06	1.23439e+06	1.63079e+06	1.65937e+06	1.60562e+06	1.19198e+06	1.24793e+06	1.38328e+06	1.54832e+06	1.28993e+06	1.06657e+06	1.32406e+06	1.24543e+06	1.39574e+06	1.21061e+06	1.27382e+06	1.22834e+06	1.60311e+06	1.18248e+06	1.30958e+06	1.88509e+06	2.35558e+06	1.73459e+06	1.53906e+06	1.58266e+06	1.65406e+06	1.49594e+06	1.43449e+06	1.50592e+06	1.17489e+06	1.25389e+06	1.61483e+06	1.22702e+06	1.55718e+06	1.4734e+06	1.47831e+06	1.2754e+06	1.05667e+06	1.19851e+06	1.41161e+06	1.05063e+06	1.43686e+06	1.42073e+06	1.67635e+06
0.57_191.0403m/z	208318	178120	192999	201129	215391	196707	135725	187348	198395	188204	164136	204810	179594	203221	191656	183418	149521	180848	189288	195792	175493	185050	180588	167763	163288	150388	154837	191873	221087	187172	133454	186627	203676	167989	158129	158625	178977	147956	193873	204896	186891	161088	191563	150509	169767	177431	182046	197755	168739
0.57_352.8976m/z	205049	207071	217649	289065	210576	207792	219553	222240	223259	190397	205199	242001	242167	203216	205451	213563	216257	201663	254420	189266	214163	204414	165305	200166	182574	211885	179267	203677	203392	212520	217988	219126	238071	183450	205202	202464	221915	187656	240135	229896	223307	190703	218708	195192	200000	213168	228120	222587	184823
0.57_420.8852m/z	307820	308150	311316	388769	309804	344892	337724	324485	299866	276522	282398	329787	321098	285355	295983	300160	291940	278705	337754	264166	317176	296584	257274	320577	254712	306449	293567	311173	284484	296405	327308	337462	381856	292362	307848	288766	318682	228264	348041	336136	308635	257364	329641	273415	294369	297806	322676	318392	251995
0.57_478.8437m/z	72049.5	81775.9	91425.9	134015	104362	101806	97181	88553.4	80465.5	60178.1	73825.5	94353.7	82189.5	56353.7	77640.4	83526.1	43908.6	70427.3	102299	67467.3	83753.8	70647.4	50782.6	49224.6	55238.1	72069.4	76120.6	92332	85034.1	90688.3	77235.3	76545.4	102777	90306.9	87703.7	79816.7	76427.1	52020	88047.4	87755.2	68980.8	65701.1	81345.4	66687.4	80900.8	71661.4	95923.8	88019.3	61633.2
0.57_571.2553m/z	87277.8	62589.5	87245.5	112813	91533.3	91363.7	77721.1	115767	83390.8	89534.5	72966.7	80484.1	69320.3	68978.1	86617.7	90781.3	92231.1	66404.6	77778.7	65413.2	69321.4	63793	94153	62356.8	70694.6	74183.9	99209.6	71199	77314.2	79479.7	89681.7	86369.1	82954	109740	68431.9	77356	78361.8	75308.3	83835.2	75359.2	70216	92812.5	67293.4	75767.5	106165	74347.4	92876.2	80971.4	93809.9
0.57_746.7774m/z	27907.9	4564.57	3608.41	2250.18	2272.16	27008.9	217045	3.11712e+06	1.93137e+06	158249	103623	4141.81	2047.07	1352.34	4017.76	19007.5	25257.9	60673.7	5361.52	17889.4	13109	8162.05	11878.4	6548.72	14261.4	23451.7	13706.1	21175	11294.2	35895.9	12675	8531.74	9054.98	47503.1	372756	1.71209e+06	2.84544e+06	193618	25873.7	2814.98	1769.65	1468.14	12859.3	31365.8	23559.5	66100.7	51471.5	15235.7	77170.6
0.58_283.1741m/z	100237	74289.1	105621	94616.5	83629.5	114004	95309.7	124365	108088	95908.6	69283.6	97722.3	116208	126253	115577	102138	99416.7	59386.8	81319.3	77018	71665.3	60801.6	74713.6	68870.9	64515.6	66159	68858.3	52372	53838.3	56928.1	110238	85562.9	95839.5	93927.4	105753	121815	94669.6	107150	88688.6	88945.6	129935	114182	95484.8	111063	104067	102493	75594.9	72810.8	70634.6
0.58_339.9373n	504216	515854	512597	629747	523022	531864	576460	552543	502891	455685	522121	597265	542018	498771	534515	543466	470982	470207	578113	433700	468446	521531	435407	460840	451407	516425	449995	531088	514408	511361	523237	509756	606346	478850	536203	483329	535123	396997	617291	606792	524326	439837	525531	470453	537335	539601	513279	540768	425906
0.58_371.8979n	182561	181603	179256	260036	177431	188799	188091	173005	167540	140892	155553	185453	171833	161649	160646	167746	177334	168565	225304	176691	211664	207983	168813	173768	154125	202630	175955	186818	189355	197599	181516	170325	206744	152528	153535	152783	183071	144668	201485	185071	174613	165389	213906	153886	199727	190896	190125	196598	124974
0.58_488.8728m/z	224910	255964	230505	314600	197792	232340	230617	228223	199308	146171	204253	245617	237139	218993	185678	183091	187548	207154	242900	178932	207522	213459	176166	217019	162453	202098	167082	223310	209068	203299	241946	221502	253899	187657	193601	190912	212722	173723	242879	241796	202800	183689	199821	186007	200918	187368	214656	212007	168451
0.58_556.8602m/z	208719	222491	207761	295841	187680	173177	181590	161942	168733	150222	151003	222213	196724	176666	180650	161799	174625	135097	190293	136265	151671	165937	135214	142944	151104	184984	182120	193498	164296	184286	196812	192403	214948	119544	166191	166253	162001	133307	211750	218398	185301	141220	234101	153391	165558	173201	170181	169758	137193
0.58_566.8891m/z	316149	296441	313973	386431	305523	335535	300435	349667	315170	240474	288274	353640	317911	315303	301048	307901	298400	267024	340642	226921	249865	292400	235152	280865	215634	275928	251174	308892	258853	278126	315898	299765	347231	317475	289455	280595	305167	244502	365491	341743	307667	238068	336999	281119	267094	316334	338439	278859	241173
0.58_624.8476m/z	160930	142548	155738	205957	145833	173382	180349	163702	153567	130513	130756	207227	162590	169214	165836	159837	145740	146053	202824	127712	109117	161047	143327	143544	134394	146803	146042	156732	151489	159719	183855	138607	185057	116129	152354	158025	146114	118180	192176	176100	170766	117255	179989	156851	139121	150670	191437	161201	120933
0.58_896.7969m/z	53278.2	28613.9	24155.1	51821.2	31852.7	33524.6	51736.8	36803.2	42982.1	34864.9	70291.2	64440.5	29222.7	49448.7	31796.4	28948.2	6883.16	18686.6	15741.1	20529.5	28803.8	20822.9	21860.4	43042	29214.9	22976.5	10268.4	23840.2	21416.2	40985	27858.8	29100.6	17719.9	21186.8	11579.3	58273.4	27606.9	34474.8	32912.7	62390.6	78193.9	8933.18	16862.5	22892.4	10994.8	40242.7	65315.5	17707.8	20468.5
0.59_1254.4915m/z	207313	985649	305531	249293	325878	297440	164425	91634.5	195985	48730.4	171187	259183	96854.1	244989	137011	215328	123123	114342	257750	497593	428321	206820	184382	175389	381784	235477	151845	745061	441677	608846	355465	988416	159464	233120	96353	229956	143958	171597	184870	29897	137830	184934	174173	263173	233090	133524	195671	81412.5	246578
0.59_1295.3677m/z	129081	157096	73848.7	13950.8	79623.6	68634.7	33823	38615.5	107364	28013	5246.51	15865.7	4032.48	304493	97613.1	136004	8159.57	83423.9	16102.7	322594	272190	211729	374720	66026.8	159368	83346.5	230122	178274	173274	22072.3	209447	145386	47292.5	30827.9	90255.2	41853.6	11481.1	81068.5	8415.91	90723.9	23496.3	154668	92271.8	39592.3	524.94	107811	11299.7	31174.6	398804
0.59_1457.0225m/z	177565	149445	288454	232218	233848	233817	214336	146668	212423	307196	153317	316561	60757.2	202281	75232.7	66252	26074.7	113943	97192.8	127862	224156	175964	49751.3	16563.7	101222	93346	271032	188381	77673.8	326372	396184	292486	232426	179812	169243	98425.4	28425.2	185416	255717	97896.9	119974	248113	40557.8	43673.8	165628	85757.5	164437	223908	139691
0.59_702.8637m/z	155952	168191	155923	202797	173199	191365	188364	149796	165328	124038	179653	231563	236649	81915.3	167809	155513	179184	168188	215065	87402.9	136492	166002	106693	128686	113910	179574	116109	151260	178397	153762	147649	199516	226963	129596	149524	142984	166317	133833	212412	166565	121163	119652	188479	172834	187858	176394	187621	178501	120177
0.61_1260.3690n	518314	400693	587757	367644	641915	875249	450419	868372	660249	515319	319911	328723	444938	622241	768966	649907	530405	370948	691561	645897	513941	779036	603356	895342	680267	334063	515983	365647	825123	728006	473516	600491	834610	411417	481134	885043	821067	627393	588326	491544	783113	662968	358055	722236	496596	612273	632499	569941	386054
0.61_1270.3043n	1.13377e+06	549069	793329	612148	909325	955475	486933	472415	815716	740123	654721	708695	789760	1.04409e+06	590501	548505	722566	548885	617892	872982	497908	615949	616138	535070	692141	315713	503027	564602	383242	458262	959459	797605	712665	855245	515753	1.16885e+06	855187	770524	719880	623321	516057	383849	695427	521646	634080	766315	593711	699923	749178
0.61_1283.7370n	370756	412130	352724	169399	289096	459849	734148	461765	526809	505127	601749	510735	624831	337197	249984	498164	408786	607510	566145	457546	150569	287963	479749	419576	280105	199084	359469	430746	338588	360447	569363	405008	417528	501104	493873	372140	341789	373716	378070	263342	571161	306137	359997	406478	489349	403652	228307	555919	543652
0.61_1285.1508n	971870	707953	484707	286552	508514	558594	750528	515508	797109	1.1007e+06	723786	1.15556e+06	2.03989e+06	1.54331e+06	1.50159e+06	1.37056e+06	1.69444e+06	847913	940477	639818	732302	496890	780779	525725	948542	530075	558197	898131	735001	753470	895849	839765	587835	520162	452549	1.3407e+06	1.06111e+06	719629	737736	1.1955e+06	973585	1.46464e+06	936058	1.16789e+06	1.08187e+06	437360	659394	889701	830339
0.61_1293.6549n	551251	316440	463294	729719	565728	824223	578081	807917	557287	718247	334745	633613	484084	1.18019e+06	411790	466156	408417	414413	628446	541643	682107	605697	562999	555345	473015	398284	655387	348629	488937	400980	586281	581884	595905	629528	765510	547510	433038	791428	321337	634537	462794	618930	855650	429407	579757	611453	383392	323328	1.07029e+06
0.61_1331.8105m/z	200152	484534	168059	336204	391483	150696	282508	341804	401872	307369	595561	426183	714549	546984	375076	133400	389851	151399	385311	270621	820877	393818	339770	205358	224196	273573	901148	367268	326668	205398	35930.2	503387	39936.3	118013	146130	247912	275427	490831	426818	404506	349213	783912	223743	228315	175877	178041	547843	639575	869342
0.61_1363.4240n	57394	179660	112443	129083	114506	89499.7	79255.1	285579	295935	18853.1	298966	103491	176033	185315	610420	440311	1.69632e+06	3.85984e+06	3.71196e+06	404620	281882	277358	187912	291151	695115	1.06149e+06	897316	2.25395e+06	1.37358e+06	377759	142866	81088.5	217970	181216	249618	211690	190121	288236	279890	540371	215564	311093	184371	376261	1.86497e+06	3.7432e+06	2.52456e+06	1.48787e+06	787549
0.61_1367.7767n	316169	328901	490553	266093	362288	343535	428418	323988	521215	420667	522296	293478	441788	466166	336520	389973	837378	527372	522531	487688	731568	713763	545072	477255	1.12887e+06	509837	832807	491086	660169	684952	641244	417328	259819	350057	177774	439839	391957	364983	418834	379880	205544	379408	382178	640323	512057	607761	572317	497359	520467
0.61_1482.4295m/z	149576	249225	396398	154147	114221	139875	57828.6	41435.8	92619.8	68294.7	203649	168114	121526	223321	90948.7	174306	84641.9	75529.7	139629	216794	74472.9	104536	117577	113822	33910.5	223262	495360	154155	142154	103969	301473	751772	95714.6	51019.7	59078.1	70704.3	76939.2	56702.7	67304.6	84397.2	194625	112399	67621	71193.6	103179	76594.9	171146	142928	183477
0.61_1664.4297m/z	30324	18530.9	15987.2	12175	1816.84	23937.5	26293.1	574.889	20819	19318.7	26789	45993.9	621636	3.61429e+06	2.7677e+06	389914	56666.8	32595.6	17045.4	13272.7	18469.1	46039.4	197930	85612.2	44945.2	22122.7	90784.2	8317.79	10510	176.966	25883.9	19290.7	24668.1	2513.76	29488.7	37449.4	23923.7	17098.9	9699.59	104011	541749	924428	3.03491e+06	2.59297e+06	378282	10166.7	15221.7	16311.1	8834.45
0.62_111.0552m/z	56871.5	83621.4	44272.6	24229.9	35934	39630.3	99937.1	51517.5	40614.3	37528.8	34152.4	41938	43620	14367.4	34220	18492.4	14018.9	28159.4	73849.5	31610	26557.5	18006.9	14286.2	56702.9	35806.2	56734.1	29713.4	23354.3	4247.86	33375.8	123789	44383.3	53622.8	46668.4	58488.3	17880.1	31038.9	17060.2	38929.3	30019.3	34257.8	2038.85	42306.1	29131.3	27835	3965.29	43461.2	55388.8	14691.9
0.62_1122.5441n	282143	184653	212774	305748	187915	159045	296236	95639.4	411317	489201	470782	443445	684965	218915	151147	213741	209641	133804	226697	234393	303818	152722	179228	267981	206151	230619	169829	55808.3	162379	161882	94627.5	293073	299896	451032	142153	234937	733034	232177	197710	313497	297986	133483	235030	125677	115467	154255	81473.9	157339	273334
0.62_1276.6664n	1.32521e+06	906400	1.00176e+06	772670	1.40324e+06	998971	1.42345e+06	1.14742e+06	1.60897e+06	1.55475e+06	1.2208e+06	1.13571e+06	1.28105e+06	1.65794e+06	1.05659e+06	1.4543e+06	1.14582e+06	1.28046e+06	1.32338e+06	974257	1.00239e+06	1.04344e+06	1.05056e+06	536956	794615	926998	784003	1.30547e+06	1.11331e+06	1.00315e+06	1.12672e+06	1.41675e+06	1.21507e+06	1.04992e+06	1.25362e+06	813677	1.6853e+06	697310	1.04504e+06	701390	981803	1.20901e+06	1.42017e+06	1.65507e+06	1.20508e+06	1.33831e+06	774299	1.19129e+06	1.35858e+06
0.62_1280.8032m/z	217886	269804	296061	140835	165213	71859.1	39061.2	98713.1	95543.4	130102	175171	93947.5	416682	431344	411939	190251	142227	94451.2	24076	231405	107299	165526	302651	139688	99836.9	92171.6	70937	116052	36157.6	109606	180828	334606	210703	55392.2	38100.5	74769.3	49233.1	78142.6	129860	370252	467777	197127	177098	126209	74442.6	59088.4	18010.9	121202	81691.8
0.62_1442.1170n	523200	721161	611939	759862	913315	584608	332204	899840	930010	474129	706218	890449	871964	965175	708642	688867	873070	524772	863481	663215	885054	621458	449450	865574	548641	360250	519395	455538	350900	345242	731339	603057	1.06284e+06	653388	513276	985106	872900	628974	537181	558941	517414	862594	588212	729908	769999	543174	880151	673905	516161
0.62_1550.7630n	44761.2	424667	468483	521998	214705	66366.2	47658.8	206329	194974	286246	354259	171972	186776	377487	91458.6	69177.2	104222	98163.3	133933	248715	116384	241487	145673	81978.9	160948	110209	191950	83292.5	69826	65452.3	409498	344728	159147	188147	117489	59900.4	372279	264224	257007	160894	251262	187680	79964.2	78938.5	54397.9	131404	105732	157004	205985
0.62_1551.0412m/z	94715.5	33858	60388.5	199008	267070	193979	77287.5	38633.9	146783	44279.8	101228	42395.3	60228.2	117515	72568.4	43307	110730	39477.1	30538.8	9045.73	18558.1	195237	176141	349903	852454	131940	88017.6	58227.1	32146.2	62255.7	82072.4	230972	163290	4856.53	71255.1	95123.4	33283.1	34099.9	113185	80437	47752.3	80909.2	93964	53062.5	8743.99	109236	13592	57445.5	57621.9
0.62_316.2103m/z	26653.9	15935.1	11046.9	12258.1	17274.6	14300.3	24107	13695.8	13266.2	15221.5	19138	20180.1	12365.9	16177.4	18972.3	11520.5	14798.2	17770.9	19805.6	15523.3	23658	22935.6	16901.8	14697.7	22650.8	14184.1	18994.6	13423.9	8008.76	10691.3	16363.9	11444.5	9284.03	12086.5	16548.2	13650.1	21450.7	24179.8	23131.6	15278.1	15349.8	26000.6	23695.2	12553.1	13029.6	30117.1	11381.6	10794.5	12917.2
0.63_1220.7346m/z	38978.8	129974	111299	133714	159543	181668	76491	250875	265970	86718.5	29362.4	88031.1	127454	133512	46428.3	116348	28658.1	386695	780086	972113	522204	311554	652493	149962	93318.5	82663.5	72442.3	139823	122941	213972	108302	96356.2	183320	119338	13623.6	114215	92958.5	160777	99008.5	59993.3	154410	91897.1	48751.4	125143	132824	304487	544323	542427	1.0315e+06
0.63_1344.1243m/z	22500.1	413831	569823	78493.1	250120	32919.1	17024.8	38135.1	50427.8	223369	319857	243911	364561	145516	178987	47692.4	137152	142495	37577.3	77899.5	97880.9	34253.5	75613.5	79499.5	119759	56780.6	47666.5	3662.27	369740	257578	673541	1.02071e+06	33164.6	21691.5	33248.3	87908.3	107783	52413.4	278409	177987	291857	169916	52917.6	230042	66905	33056.8	40277.3	65886.7	48578.2
0.63_1386.6873m/z	311663	489104	172097	254358	224977	314914	167422	315995	259609	249142	220101	101370	335235	83251.4	248106	277176	279602	310310	151888	202900	225838	213123	346376	221378	151067	212751	240855	71638.9	279031	199458	407283	154951	319511	316237	332977	157225	179726	320155	327815	323765	175186	196611	157121	157043	244550	220131	202908	181454	120611
0.63_146.0599m/z	14293.4	24199.1	21294.5	16310	18986.7	26763.2	20058	27695.4	20505.8	15467.3	26045.8	28694.3	18101.6	14634.6	20845.5	18504.9	17176.8	23095	11244.5	21167.7	23001.3	15190.8	15285	24459	24080.2	31008.1	12467.4	17477.9	3383.08	17564.8	9120.82	21776.7	17578.7	21591.8	24375	16251	27533.7	15900.1	15562.3	15087.3	17181.5	9212.36	19065.5	17794.7	19765.4	10069.7	22239.7	35693.9	18629.1
0.63_191.0764m/z	35826.8	34197.3	33799.3	36825.5	29095.8	28829.2	29083	28116.6	30456.7	25502.1	31988.9	33303.7	26678.5	30850.4	32513.3	33619.7	35300.8	38792	25967.1	37312.1	36583.4	31418.3	32155.4	41144.1	36241.5	32708.9	27488.3	31385.4	31967.7	33236.6	26271.2	32917.9	34399.6	25190.8	29723	26433.3	37869.7	36792.5	29077.4	38083.1	27944.4	26248.4	36112.8	29325.9	39510.7	27404.2	30731.9	40660.8	26416.7
0.64_1268.0172m/z	32376.7	46852.9	145894	84971.3	101256	98207.7	163801	169312	142238	49193.3	79185.2	87152.3	56784	41992.5	41343.4	3878.39	33257.4	53333.2	51884.3	84001.2	100035	66139.6	182184	351617	354831	40130.9	214874	121317	59761.2	36676	147356	12622.2	51674.7	53037.8	62018.6	112531	162174	145963	200612	89513.6	71776.4	15609.7	14837.3	51429.6	10041.3	53101.4	78214.3	39980.2	45431.9
0.64_1296.9184n	493789	28478.9	79276.7	23627.1	29599.2	13128.6	5651.96	73009.4	57777.4	88170.9	40956.9	51247.9	79644.7	145650	310756	208120	131077	35807.2	40209.3	62004	26736.6	126383	90535.1	45986.4	77641.7	9687.24	47978.4	1377.82	765472	1.48915e+06	281559	96973.4	34285.9	72623.8	66321.8	29123.4	89314.8	22618.8	99834.2	49739.9	89218	45057.1	94630.4	81260.3	38982.7	22615.9	27549.6	21831.9	21431.1
0.65_197.0783m/z	90555.3	94772.6	82154.1	77140.4	89057.4	73725.8	80989.4	56490.3	73530.9	57701	62219.3	63758.4	66697.9	46987.3	58001.7	62700.7	60354.7	70587.7	69064.2	77385.5	61853.7	51029.7	64919.9	68337.9	61854.8	78153.4	52991.6	71431	59846.4	63726.4	86644.5	85113.7	90028.2	62819.7	63905.1	70692.3	70658.4	55939.7	65339	69879.9	64330.7	53070.2	67397.8	67302	55655.1	65220	64042.7	69519.5	57185.8
0.65_243.1820m/z	5187.38	3809.5	3279.6	3816.96	2471.95	3055.72	4532.53	3615.04	5411.55	4862.26	7439.56	5978.28	2875.79	3419	8114.61	3694.95	2894.12	4711.85	4565.06	4186.58	4481.07	3874.4	4219.79	3297.19	5609.27	5453.03	1664.07	4716.19	2522.32	5135.88	2719	3219.06	5623.26	2210.56	6084.64	2810.27	4693.08	3015.67	4852.32	5588.42	5107.16	3799.59	6033.81	4018.08	2610.35	5342.52	3929.98	4313.82	2565.39
0.65_325.2069m/z	56596.8	41170.3	33121.1	36069.9	37447.3	30813.3	38876.3	38880.3	39427.8	37050.1	41816.1	47517.3	38180.3	40916.7	42865.6	34747.7	37713.7	35514.4	34622.7	38915.3	33734.2	33199.7	33234.7	35916.3	32200.7	28038.4	25747.6	27241.3	24165	26708	41810.6	39404.4	52889.3	27511.3	40733.2	40733.6	47590.1	36665.1	34224.2	42122.3	35771.4	38231.8	40869	48212.8	42607.8	43615.5	35683.9	36369.8	25629.6
0.67_512.3346m/z	107230	210295	142314	295416	291217	123505	230578	147420	206607	159813	155984	193730	121203	54728.6	124666	185674	97822.9	161712	162144	260412	139007	145846	88052.8	174456	141655	196726	116679	225629	122491	239698	117515	97403.6	160418	175163	82930.7	161548	110476	252842	204557	145357	127394	135638	271163	144836	207858	146174	144783	103392	131312
0.68_156.0762m/z	48964.5	37223.5	40979.9	38712.4	34788.1	38539	31506.1	30209.7	33683.9	22262	31471.1	26568.4	29531.9	27259.3	27465.4	33032.2	28183.2	37890.6	24358.4	44763.3	33514.6	24955.6	22989.5	31229.1	26534.2	23273.2	19717.9	20214.3	20708.4	33363.7	28583.9	36325.6	53486.1	35941.3	29748	32091.9	29439.2	28623.3	23414.1	27565.3	23030.2	22138.7	37750.9	30025.5	34003.7	25036	33349.9	37026.4	24587.7
0.68_175.1470m/z	3470.57	7309.73	5363.5	3555.34	5678.53	3038.08	7155.66	2943.75	4835.55	4731.21	4957.9	3951.41	3952.24	4297.14	5420.64	2271.95	4627.44	3949.94	3993.41	2466.57	1831.6	2325.79	3103.7	1373.86	1700.86	2478.49	1050.32	3249.93	2381.21	4193.16	5098.58	3851.85	6477.04	4077.68	6977.36	4640.83	6725.84	5449.45	5018.46	4729.64	2837.11	2488.31	4367.87	3646.17	3188.3	4390.21	1706.15	3047.82	3139.51
0.68_210.1615n	29191.2	42549.9	23687.8	19512	22611.2	21727.9	76268.8	16432.2	47357.5	30472.3	36991.2	15382.2	29297.2	25670.6	40198.6	23345.8	14217.5	19861.7	27598.5	16459.7	14148.1	16544.2	10264.5	9443.19	12116.4	14808.4	8705.64	19095.3	14290	22061.1	30984	17956.4	48604	20846	64622.9	27456.5	44957.3	43016.9	20408.5	26357.8	21467.3	17739.1	32706.1	26915.9	15031.1	21493.3	11325.4	12074.2	20178.2
0.68_227.1884n	99368.2	126652	75861.4	62356.1	67910	61273.2	163172	49473.1	108174	81110.8	97908.9	62749	87288.5	76629.9	99892.6	62053.7	41946.9	50128.6	68408.1	52424.9	48261.6	53037.7	36479.1	36209.1	40352.2	40755.9	28260.2	49232	35463.4	61137	92676.3	69698.8	123323	55545	140333	73511.5	118996	100325	64462.8	79797.9	62794.1	53442.8	82535.5	73667.5	50153.1	51922.2	35867.7	44728	59039.4
0.68_453.2418m/z	69777.2	100591	99970.9	134096	126235	153009	294862	296687	189322	208676	534712	384738	135151	510183	399659	412433	345850	461601	389763	373936	386523	364276	181961	224826	213055	129153	142922	140325	305537	120665	70614.9	85500.6	76509.6	92159.7	267405	228016	211697	396395	415757	403645	265606	356825	551385	218992	277569	446816	318414	224821	171749
0.69_178.1225m/z	81202.1	86616.5	63629.6	70212.7	67313.6	84255.8	95392	74234.5	93825.5	92678.3	139018	273564	90083.1	271476	287422	240956	228769	124083	223763	294573	109788	171885	223032	136845	202298	110923	207689	231975	140537	92803.5	69086	80734.8	97004.6	68998.9	83071.6	79999.9	112594	165872	91815.8	178408	167066	172991	143229	262498	195711	189146	109817	64782.7	94929.1
0.69_190.1266m/z	6301.18	3103.23	3430.8	2943.79	3997.75	1846.14	7439.87	1842.88	5808.83	52302.1	3657.84	4583.12	2288.21	10949	9629.97	3867.61	3300.31	2927.6	11601.1	3512.43	2752.6	2299.72	2771.51	1585.16	3134.09	5978.12	3938.19	4890.19	4598.88	2455.89	3543.58	6401.26	6991.31	1931	3487.78	2993	4564.73	3248.1	2609.61	9483.78	4094.5	5615.48	4000.63	10619.9	6784.08	2712.5	2245.13	1655.87	2871.23
0.69_478.1980m/z	21973.2	43815.8	29545.4	38918.1	37505.8	36777.2	53408.2	34647.3	23524	17475.9	25093.2	54630.1	35809.9	13060.5	28744	21289.7	19158.1	24906.5	15693	41956.7	20373.7	20377.6	13741.8	24187.6	23466	29196.1	13605	21291.2	13482.9	24229	46211	16096.2	23126	16216.3	26890.4	22259.9	52193.6	14141.4	36382.4	34109.2	40702.7	8849.86	58809	29865.1	28288.3	21939.6	29164.8	15048.9	36964
0.70_308.1263m/z	1198.34	5524.22	1892.23	14211.6	41727	3732.65	1961.71	11445.8	4212.36	9146.42	15364	6858.92	2139.99	8072.3	9075.61	7992.41	6096.33	11213.6	5189.36	22089.9	8053.83	6459.88	10150.4	5137.13	7118.26	6174.33	2534.91	3944.07	4028.6	4805.68	4835.9	1757.08	5876.79	15205.7	7891.22	4986.31	3457.86	7523.98	12002.9	3177.26	4343.99	7101.83	9478.76	3215.99	11602.8	9499.85	6217.19	3921.07	2594.48
0.70_800.3784n	15.873	4.60479	50.2619	66.0546	82.8259	38.469	15.0048	79.8236	0.443968	4.23383	53.9805	1.77954	23.3945	9.29402	5.62678	10.9656	47.5364	11.1142	11.8124	10.9701	21.1408	3.90922	0.784837	12.7279	6.98042	30.2458	5.26678	2.26607	0.0370054	0.193881	60.8374	57.3928	6.79884	49.287	3.30504	17.9512	3.33654	6.46937	56.3342	7.50984	2.98125	12.7417	5.11833	4.21177	54.6981	0.00260073	18.9526	0.0836657	8.13438
0.71_549.2649m/z	5510.52	6800.76	6586.7	9981.9	6010.3	8041.76	5931.73	3744.9	6349.67	4530.36	6416.36	5112.24	5054.23	4950.4	2092.22	8874.72	3756.45	4100.59	4776.29	6372.43	4921.14	7329.26	5450.76	5976.06	4071.95	7243.06	6896.35	4882.78	166149	7014.9	5852.43	8926.12	7077.78	6116.92	7806.36	5671.67	5808.52	4124.58	5285.54	9088.93	8853.04	3714.22	4583.02	5155.56	8795.62	13839.3	3312.72	4110.33	5681.81
0.72_157.0990m/z	22628.5	17779.3	17116.2	19923.7	17804.9	16357.4	14197.2	12920	16715.7	18444.9	24179.5	21867.1	13306.4	20578.3	21812.1	19260.8	13187.9	24016.2	17467.1	32715	23558.6	13078.2	8126.11	18919.2	23285.3	14702.7	9893.37	13654.9	9538.7	21584.1	16510.7	15638.6	22768.7	13877.6	18476.5	19708.9	21506.7	18632.9	21007.3	22178.5	15172.4	18256.2	21428.5	15009.1	17712.3	15788.4	18918.7	19916.3	8828.35
0.73_468.2421n	38270.3	32918.4	42003.6	38602.8	38943.6	38085.3	45871.5	50405.2	36110.9	41332.5	42590.7	46109.6	38046.2	39804.4	46776.8	39944.1	44914.7	64830.8	53842	59380.1	59130	50114	39564.2	66637.1	67145.3	69226.9	46410	58791.1	339386	41452.3	36552.9	46705.1	35835.2	34481.5	36620.4	46263.1	41995.1	39353	43636.7	46476.2	42630.8	47841	46287.9	36988.5	52426.9	71623.1	53885.5	44810.7	37632.2
0.74_362.3264m/z	100536	78684.2	68019.6	62970.4	79283.3	101004	84308.8	78127.3	100702	96128.9	132798	169377	62196.7	174734	191943	170845	180382	105694	209909	205805	91346.4	225050	193364	121895	194736	99570.1	218236	257040	161486	102361	81434.7	64639	95880.6	80234.9	78665.6	93386.7	98267.8	121207	114858	176609	181874	160942	126535	198456	180762	180255	85489.5	89097.3	82312.1
0.74_540.3640m/z	55316.6	83036.7	66234.4	99496.6	102503	60195.1	85935.5	55940.8	81841.8	69394.6	61618	73009.3	66771.7	41732	54140.3	78456.8	51741.3	70031.9	73821.5	87439.9	66208.4	64442.5	55399.9	76899.3	67351.3	70608.2	57364.6	79820.2	58467.9	77960.9	60576.3	56562.1	66959.2	69383.6	48188.7	66647.8	54291.8	68568.9	82304	61264.5	65607.2	48545.1	79528.6	62129.4	68197	61570.2	74280.7	56948.8	55475
0.75_317.2933n	2.82447e+06	2.4704e+06	2.27365e+06	2.19922e+06	2.49605e+06	3.33088e+06	3.83275e+06	3.53166e+06	4.25363e+06	3.53924e+06	6.88811e+06	1.16049e+07	2.94935e+06	1.25666e+07	1.31865e+07	9.47951e+06	1.00835e+07	5.37077e+06	1.33042e+07	1.18453e+07	4.20624e+06	1.18114e+07	1.15335e+07	6.5047e+06	9.83074e+06	4.3348e+06	1.10576e+07	1.22643e+07	8.17814e+06	4.07405e+06	2.62421e+06	2.63107e+06	3.0808e+06	2.83206e+06	3.40962e+06	3.28673e+06	3.76326e+06	6.93578e+06	4.10678e+06	9.7405e+06	8.80363e+06	9.16589e+06	4.90924e+06	1.21071e+07	1.08061e+07	1.02472e+07	4.09914e+06	3.40747e+06	3.40845e+06
0.75_318.2100n	236458	222981	204997	212770	240303	193663	180054	177132	249704	241453	189487	203897	213360	162672	187469	211426	182483	159931	187177	191284	188793	190037	209927	180171	175586	223804	159589	213255	156233	225976	216577	207582	243381	167785	179521	203473	241185	156446	196242	222152	204036	138646	191647	228973	164460	138436	192402	229223	210602
0.76_283.1594m/z	32077.6	50767.7	54830.7	53939.8	55972.1	24142.3	34851.6	22749.9	16179.5	24282	25423.4	8447.87	23041.1	8518.91	4942.94	4740.23	5071.84	22878.6	18924.9	10881.2	23528.5	16366.6	20140	23433.2	17789.7	24567.9	17846.9	11205.9	10731.9	16844.7	56533.5	41262.8	41416.8	33570.5	18347.8	22028.2	22360.1	6836.37	27842.2	22105	7874.44	12693.2	7445.49	13429.9	5736.17	8057.64	25578.7	31084.8	23031.2
0.77_244.2623m/z	251247	349573	163162	203507	225282	296002	301135	268381	311353	283658	475234	725962	324741	815856	922916	1.00153e+06	721812	396588	736492	1.00556e+06	310495	613984	583358	471923	629047	317617	665603	691206	494467	308230	229175	250774	446100	258601	302910	296452	394788	499615	318373	592601	623305	608740	449302	726159	679526	619950	346964	246411	402575
0.77_359.1837m/z	149920	128878	117462	102675	113900	112597	95915.3	84192.6	137523	95121	107448	179017	111319	134207	132051	161773	151578	83641.9	136801	152568	78224	145264	222715	113830	111444	110589	179895	192926	119582	131999	123674	121341	136462	89656.9	86156.8	103407	111596	132716	83117.4	166627	152229	106572	93994.3	216480	138148	125977	84565.3	104371	98970.6
0.78_229.2406n	5.04258e+06	4.81241e+06	3.77034e+06	4.58924e+06	4.60731e+06	5.8119e+06	5.97638e+06	5.69462e+06	6.06481e+06	4.81046e+06	7.58436e+06	1.02848e+07	4.8169e+06	1.05602e+07	1.13964e+07	8.95836e+06	8.27925e+06	5.81637e+06	9.02898e+06	8.74812e+06	4.54282e+06	8.02829e+06	8.22048e+06	6.74459e+06	7.73879e+06	5.23893e+06	9.06171e+06	9.64544e+06	8.9155e+06	5.48859e+06	4.66237e+06	5.2962e+06	5.06193e+06	5.39593e+06	6.71803e+06	4.9742e+06	5.41718e+06	8.62845e+06	5.76043e+06	9.06706e+06	9.00295e+06	9.24366e+06	5.37348e+06	1.00165e+07	8.83456e+06	1.02732e+07	5.84882e+06	4.28712e+06	4.37473e+06
0.80_200.2372m/z	80424.2	128735	56650.3	80073	42814.1	51471.2	57129.5	61691.8	62861.9	62884.3	86225.7	148827	129799	153445	143108	270617	147244	72953.3	102424	261595	78115.4	90343.3	154281	97347.8	138345	86352.3	148767	172607	163015	77675.6	54449.6	67639.8	172512	46857.6	48422.8	78579.8	125974	119250	68581.6	113427	121200	101193	105210	125652	117573	110997	77850.4	50055.6	121042
0.80_214.2529m/z	275128	262004	204259	223797	244690	269930	284193	269482	282045	250995	331406	503015	243573	479090	542455	484731	398949	313229	479100	628842	313772	373451	515277	400585	448530	287017	513705	606686	571419	311010	220792	296057	294289	249984	269273	364726	279837	435878	231221	304772	374807	295583	292922	473674	395224	458727	342794	226348	287010
0.81_484.2996m/z	66401.8	78581.2	77825.7	91553.2	88916.4	95843.3	77925.7	84793.4	96681.2	91300.6	95894.4	103718	83753.7	94660.3	109150	113253	117077	123265	124691	109195	100360	108722	91428.7	101186	98749.4	98211.3	85745.7	97365	46348.6	92432.7	79041.6	89579.6	81717.1	79173.8	87834	88993.1	100118	80973.1	94049.6	99519.6	108313	84834.4	103730	111245	110692	84186.7	111195	112867	95909.2
0.81_526.3472m/z	199274	224631	233011	264535	273134	231085	252296	267080	282205	272330	302381	305510	236781	274071	308940	333324	284580	281059	365222	328693	277696	334107	303542	274636	277079	257861	279467	320010	149862	253176	234958	231669	241263	218135	260200	233003	250343	307809	303962	315178	304372	222475	323072	323913	352762	202391	258537	292056	225776
0.83_286.3103m/z	238171	234910	186766	201374	221214	332085	333930	273915	374469	278114	586324	818198	288578	883901	1.08209e+06	712422	621760	371621	707967	717769	337853	542548	583950	474448	704820	406357	766198	808036	607486	388699	230662	277355	280502	287169	409458	312706	361086	723705	416504	595069	694067	692869	356360	753688	630829	718794	352253	227534	239454
0.85_407.1833m/z	22691.8	13146	12763.2	18987.3	11245.9	15910.6	13888.3	12268.9	9454.99	14163.5	15865.3	11941.6	15156.4	11996.5	16812.8	14641.5	10168.1	24306.8	21927.3	15460.5	28392	11097.5	9428.84	16746.9	13811	16775.7	10058.4	10424.1	20809.4	23018.6	16951.5	14970.7	11523.6	13125.1	14106	10499.9	17193.1	17387.9	17682.9	12108.8	9855.4	13579.1	23305	7768.27	11945.1	23879.6	20848.6	9187.01	11690.6
0.86_271.2513n	6.31322e+06	5.36397e+06	4.1889e+06	5.77797e+06	5.2096e+06	7.10274e+06	7.92585e+06	6.50422e+06	8.0061e+06	6.92171e+06	1.43369e+07	2.27869e+07	6.41054e+06	2.61421e+07	2.80546e+07	1.85779e+07	1.88932e+07	1.05849e+07	2.3658e+07	1.9851e+07	7.64582e+06	1.61148e+07	1.67409e+07	1.13988e+07	1.54041e+07	7.42707e+06	1.7785e+07	1.73389e+07	1.35551e+07	6.86366e+06	5.50569e+06	6.43752e+06	7.01186e+06	6.55266e+06	7.76281e+06	6.89099e+06	7.12155e+06	1.57404e+07	8.52754e+06	1.73786e+07	1.68073e+07	2.0034e+07	9.72867e+06	2.57137e+07	2.02835e+07	2.26882e+07	8.44399e+06	6.1953e+06	6.33755e+06
0.86_635.3746m/z	40007.6	26476	40435.8	49869.6	40437.4	29806.4	29217.4	32232.7	37182.1	28322.8	28863.5	26130.4	25743.2	23885.6	24442.7	21128.2	31653.3	24423.4	28469.8	28155	29850.5	20873.1	19048	22927	24995.7	23748.3	25574.8	21286.2	17908.5	21189.7	32465.3	27229.6	46827.4	25339	32890.7	42883.6	24849.2	27711.5	18955.4	22022.7	22254	25104.4	23000.6	48099	31772.8	23582.3	27339.4	23675.1	20711.1
0.88_1294.0086m/z	93669.2	67025.4	57836.6	67736.2	16721.5	5338.1	43885.8	24504.2	77810.3	446386	337150	72815.3	111069	46982.2	807.12	1818.17	930.13	902.038	148.168	416.942	2941.46	4724.76	4118.37	4756.49	18410	24695	213499	9267.27	2686.19	10216.1	136577	384305	4790.82	9186.11	14247.4	25771	100169	374395	137823	103449	19372.2	812.756	3459.31	2771.24	20766.8	2261.9	11824.4	10346.9	14390.5
0.88_304.2853m/z	87181	103564	114894	143765	122371	157293	248194	154635	157480	131725	172105	247706	103080	212503	227281	191610	272618	165362	289966	252938	131660	215053	204268	128338	203913	142853	197952	232758	42246.3	117655	100677	117091	190940	120077	174179	189215	152144	167072	129736	201629	165579	116678	151709	261578	230316	111902	157709	130495	103412
0.92_518.3249m/z	429015	1.0777e+06	715642	1.40109e+06	996943	1.09345e+06	764185	598688	904670	868154	1.41146e+06	1.03495e+06	1.18771e+06	365544	668457	676231	343398	988934	549597	1.29422e+06	488170	730399	446686	632787	857712	749516	817183	1.76944e+06	635401	800431	494561	600019	659718	720874	1.5321e+06	363190	732239	1.56801e+06	743142	899781	470290	694569	874877	1.20155e+06	1.06055e+06	668680	393958	619993	585850
0.95_467.3017n	735864	2.33307e+06	1.23167e+06	3.4925e+06	926711	1.02908e+06	1.3445e+06	2.14666e+06	1.32002e+06	1.09426e+06	2.54989e+06	2.0418e+06	1.01632e+06	1.39542e+06	751704	1.33954e+06	654095	768558	1.04178e+06	2.28383e+06	961605	952684	932551	927687	2.22178e+06	2.30698e+06	1.01328e+06	2.10242e+06	1.07658e+06	1.09556e+06	1.01357e+06	934564	1.53278e+06	1.68291e+06	1.51804e+06	712639	905719	2.9801e+06	1.48325e+06	1.47918e+06	602122	1.77725e+06	1.28857e+06	1.41991e+06	1.26498e+06	639087	1.10173e+06	1.7869e+06	666017
0.98_568.3406m/z	1.88792e+06	2.37072e+06	2.49734e+06	2.31551e+06	1.76414e+06	2.21339e+06	1.19986e+06	1.74513e+06	2.11445e+06	2.11037e+06	2.48024e+06	1.20068e+06	1.96259e+06	1.03436e+06	2.47808e+06	1.36999e+06	1.37358e+06	2.00458e+06	2.61209e+06	2.27632e+06	1.89883e+06	2.4946e+06	1.67221e+06	1.17565e+06	1.46536e+06	1.25354e+06	1.20156e+06	2.48055e+06	2.24531e+06	3.096e+06	1.92048e+06	1.93511e+06	1.23071e+06	1.27173e+06	1.59802e+06	1.76569e+06	1.10985e+06	2.82883e+06	2.08873e+06	2.32703e+06	2.07884e+06	1.61998e+06	2.47582e+06	1.59352e+06	3.26518e+06	1.83514e+06	1.6894e+06	2.25561e+06	1.10881e+06
0.99_493.3174n	2.58331e+06	3.73332e+06	2.23102e+06	7.54368e+06	2.6948e+06	2.88631e+06	2.60321e+06	2.47623e+06	2.31701e+06	3.20698e+06	5.05515e+06	2.68423e+06	2.89692e+06	2.4338e+06	3.06406e+06	2.29219e+06	1.63071e+06	2.44165e+06	3.30379e+06	3.94889e+06	2.68621e+06	3.71799e+06	2.19203e+06	2.01505e+06	2.57461e+06	2.03899e+06	2.08905e+06	4.31902e+06	3.10958e+06	2.7672e+06	2.04624e+06	3.25086e+06	1.8407e+06	3.52838e+06	4.42745e+06	2.57624e+06	2.14078e+06	5.90916e+06	2.5511e+06	3.40939e+06	2.5662e+06	3.39101e+06	3.71527e+06	3.08552e+06	2.90219e+06	2.29612e+06	2.92602e+06	3.84216e+06	2.08083e+06
1.00_214.2165m/z	271329	230985	212823	209825	239206	286180	323406	286837	367164	285683	544581	1.27209e+06	251613	1.35629e+06	1.39134e+06	869219	882009	478684	1.14836e+06	1.10658e+06	410080	818940	1.03336e+06	612743	818970	414580	983163	990365	626019	302368	215821	285937	275439	244597	258008	234328	300310	724186	325931	752809	748156	811774	497640	1.10694e+06	887345	908998	407300	201373	259384
1.01_526.2946m/z	239257	272471	304998	469129	373068	276054	198853	301461	237840	404731	315021	251655	225375	202119	327711	248767	203711	325172	386841	338266	323219	292641	215207	157104	225276	238503	191835	318699	252188	413879	249619	332355	167368	232932	263253	236594	164656	419579	332771	278623	360250	323618	440622	260296	544530	258581	230909	261110	179834
1.02_512.3351m/z	235946	255864	270746	497010	274835	290045	317565	257308	326128	326350	340545	405321	214266	245758	369864	270618	284401	308831	332822	365186	413629	374027	315924	362266	384739	297691	288660	318809	385747	468149	268790	464729	327773	309083	309759	310539	340735	434407	370080	281651	293772	393478	474051	313389	397543	319924	314921	235645	257289
1.02_543.3333n	9.08817e+06	1.27277e+07	1.12783e+07	1.58007e+07	8.87326e+06	1.05366e+07	7.38373e+06	9.70035e+06	1.25323e+07	1.23857e+07	1.2548e+07	7.6801e+06	9.88318e+06	8.69903e+06	1.34246e+07	9.27739e+06	5.97007e+06	1.27839e+07	1.1218e+07	1.09068e+07	1.24554e+07	1.31597e+07	8.88561e+06	6.46923e+06	8.75791e+06	6.84023e+06	6.556e+06	2.00145e+07	1.06971e+07	16238445	7.94875e+06	1.04294e+07	6.44914e+06	7.15056e+06	9.75345e+06	9.79753e+06	6.94745e+06	1.60781e+07	8.92917e+06	1.12208e+07	1.04798e+07	1.06652e+07	1.5296e+07	7.25136e+06	2.03486e+07	9.95113e+06	9.86893e+06	1.32582e+07	7.37067e+06
1.02_544.5708m/z	39151.6	94330.9	57076.6	21270.3	34385.9	31171.5	18234	42850.4	16188	14500	8814.47	19134.7	40914.6	31192.7	23769.7	33093.6	5368.35	15419	44897.3	53262.5	119561	120036	43023.2	7234.21	37155.7	5151.18	7672.9	52133.2	79455.2	229395	24363.3	65234	9388.44	16326	42060.7	46973.7	9347.22	7028.85	31650.1	35539.5	47993.5	28401.8	16251.1	14242.3	30118.2	36506.1	34318.2	80396.1	12897.9
1.03_524.2534n	23766.9	41133.5	47020.8	73234.6	29070.9	39619.9	23443.5	32230.3	29654.3	44346.6	42163.8	26037	29069.3	24813.9	42842	26510.5	20047.5	42724.7	41520.1	44335.3	46877.7	49231.2	24199.1	29256.4	41353.2	31385	21531.3	72983.5	43899.9	62439.7	26638.1	35300	16518.7	19580.3	33687.8	30288.9	20356.7	59384.6	30094.9	37825.7	32411	38547.6	49086.2	23861	72336.8	38342.6	30753.4	39639.1	20358
1.03_760.4343m/z	28594	29434.1	38821.7	54311.7	15837.4	37029.8	30584	29059.8	15233.2	35915.6	29912.7	32766.1	14971.8	53914.1	33721.3	53946.9	23696.5	27093.7	34842.3	37252.7	17206.1	18369.9	13464.9	18905	27047.4	16525.8	23965.7	27212.6	22948.3	19417.6	27419.4	30531.1	48649	36895.8	17152.8	45350.4	37888.7	38791.5	22166.4	14312.5	28607.3	17900.4	23550.2	41933.5	38726.8	7744.5	31910.3	10893.8	31686.2
1.05_607.3196m/z	12257.5	12281	10794.7	13865	12312.6	16112	12254.7	9026.08	16081.9	13607	14020.9	12372.1	10905.6	12998.5	11590.1	10768.6	10566.5	10282.2	15284.6	13181.5	16258.2	11178	10705.6	13020.6	10686.7	11582	13079.1	12510.3	12010.1	10604.2	7250.09	11567	11940.8	9250.81	14402	12049.1	7715.19	10215.9	11919	10811.5	13023	15217.8	12728.9	12073	13726.9	14955	16605.2	9143.52	12205.3
1.05_738.4209m/z	155538	141979	153260	215679	151052	162853	114535	147276	172805	159470	150848	132550	135502	142555	148740	126628	131479	138547	114653	141382	153440	159097	123863	96814.5	126153	112528	146290	185576	120192	152806	155163	144330	139614	156759	144715	148134	131978	177544	125689	131062	164300	149275	173676	122969	211583	122998	141226	128012	170438
1.06_1038.6670n	29452.2	601842	732653	535622	227980	3.66078e+06	136523	782940	1.78116e+06	1.76355e+06	1.68874e+06	283517	686107	42821.4	618614	474095	30512.1	1.58007e+06	227061	1.30417e+06	1.94008e+06	2.08923e+06	266501	594202	159897	291614	511378	5.62846e+06	712848	2.40045e+06	103156	285639	212118	593925	143240	69699.2	439374	1.22517e+06	135991	1.19956e+06	1.76623e+06	366863	885617	155702	3.17711e+06	741625	130341	334507	398554
1.06_184.0730m/z	55113.3	97441	82192.7	88044.5	75991.9	143241	62426.9	84050	119366	118887	124679	74501.3	83949.9	47807.6	83889.3	77744.8	46105.1	120019	80902	97220	94337.3	94034.2	56378.7	67448.6	62769.7	60074.7	62193.5	164334	73442.4	105497	55234.4	69953.7	62791	76857.3	65256.3	60195.8	78133.5	106282	61163.3	107092	102874	73289.2	102266	66103.4	148899	97165	66424.1	76186.7	63760.3
1.06_298.2738m/z	48577.9	42983.2	35988.6	56519.7	40647.1	71568.4	52298.1	75726.7	41562.9	97440.5	56217.6	57827.5	193472	104678	143862	92871.6	116943	72679.4	156738	167993	185399	156375	286825	171541	212458	202251	174235	168990	201814	194130	51108.9	31009.7	39757.4	60046.1	47020.6	69347.1	111739	67081.2	95446.4	51325	123457	70042.5	150455	102806	94768.4	76156.6	94182.4	86536.5	183878
1.06_483.2488m/z	126166	242004	235934	221603	198194	459309	143241	262327	352460	353538	346550	194187	239945	101356	241417	222953	128877	363238	201665	319463	353675	382017	177918	237723	167343	190160	229247	546363	266142	403421	139059	174993	160317	233340	172038	142377	218193	300704	159827	306448	341964	177265	282310	169350	460367	271210	167460	230021	205266
1.06_519.3335n	1.63661e+06	3.33772e+06	3.15819e+06	2.77632e+06	2.48585e+06	5.90899e+06	1.61763e+06	3.21481e+06	4.49846e+06	3.97449e+06	4.54175e+06	2.38731e+06	3.03347e+06	1.18476e+06	2.97943e+06	2.76614e+06	1.45613e+06	4.64115e+06	2.35385e+06	4.18401e+06	4.70505e+06	4.86671e+06	2.34495e+06	2.92852e+06	2.02234e+06	2.35801e+06	2.87516e+06	7.14609e+06	3.31856e+06	5.14783e+06	1.84493e+06	2.35719e+06	2.05889e+06	2.7908e+06	1.94717e+06	1.61798e+06	2.66451e+06	3.86664e+06	1.88227e+06	3.98955e+06	4.71103e+06	2.25025e+06	3.574e+06	2.10262e+06	6.05045e+06	3.42277e+06	1.96538e+06	2.81585e+06	2.6352e+06
1.06_539.8154m/z	7531.98	36473.7	2771.13	8162.11	9616.82	79807.9	2908.56	24819	55317.8	32927.2	33387.5	11389.7	20516.5	17939.7	8808.39	9034.46	2040.16	37679.9	8966.76	31219.2	42042	32072.8	8072.23	15711.3	1845.74	9309.75	23926	74996.1	17722.6	41247	19667.7	10380.2	5711	18425	3892.67	9222.23	7166.85	32896.2	4819.06	25249.1	37871.4	14419.1	26103.8	12040.7	67167.4	25881	7595.1	17493.9	8582.31
1.06_714.3691m/z	146409	305061	285311	263915	204198	702702	148770	315133	503006	461218	481633	215332	279754	82081.3	259179	243091	114154	496121	188223	383662	421909	440641	193174	231529	145619	190295	231023	804514	301243	516569	152140	198596	169921	241512	167116	169737	244673	416059	179339	393008	455961	203371	330823	189526	663597	335419	155792	244791	218036
1.07_104.1064m/z	5532.16	14203.8	11110.7	8865.22	10634.8	20130.6	5397.21	12935.6	15988.1	15751.7	13994.2	9151	12070.7	3814.15	12229.2	9235.24	9752.11	15771.6	8798.09	16412.8	15377.3	15961.6	11280.4	10458.4	9660.91	12102.4	8164.6	21134.1	10917.5	16939.2	7534.55	8707.78	7277.78	11186	10207.6	8281.96	10254.6	14577.4	8809.36	14056.8	16816.6	8214.89	13650.9	9351.06	18012.5	12194.4	6050.08	12185	10139.6
1.07_279.6468m/z	14895.5	40607.1	36056	25898	28055.9	73584.5	16848.9	33521.8	52925	53209.7	53785.4	33060.3	33734.3	20168	35716.2	29241	18575.2	48311.2	26198.8	39594.4	52235.5	48050	26820	40102.2	25193.6	34402.2	36568.3	76425.2	39663.2	46720	25137.4	32061.9	26952.7	29992.3	29744.2	19536.3	39826.2	46352.6	20206.9	44936.6	54709.1	30213.7	42223.1	28550.9	63991.3	33539.4	14738.7	32278.8	36157.5
1.07_482.3247m/z	640156	1.19514e+06	1.15868e+06	1.84509e+06	757930	1.16915e+06	920117	1.24698e+06	1.01008e+06	1.49672e+06	1.84461e+06	954187	945536	925629	798169	975573	702349	973924	935029	1.27268e+06	1.09794e+06	1.05255e+06	1.022e+06	968567	1.2162e+06	972361	791560	1.58138e+06	1.06916e+06	1.22733e+06	890828	873656	981465	921839	1.1853e+06	1.05681e+06	841717	1.49228e+06	896122	1.47958e+06	1.11139e+06	1.10097e+06	1.29046e+06	1.0984e+06	1.23089e+06	1.25368e+06	859540	1.59041e+06	853316
1.07_519.2986n	3.78877e+07	6.49246e+07	6.0629e+07	5.17568e+07	5.06691e+07	1.19804e+08	4.24615e+07	6.75933e+07	9.43522e+07	8.91326e+07	9.046e+07	5.39871e+07	6.43015e+07	3.29495e+07	6.18588e+07	5.76536e+07	3.52841e+07	9.37031e+07	5.14449e+07	7.61853e+07	8.10046e+07	8.29381e+07	4.80007e+07	5.88006e+07	4.4001e+07	5.19558e+07	5.55155e+07	1.31294e+08	6.07466e+07	8.77158e+07	4.22338e+07	5.05624e+07	47662159	5.60471e+07	4.34971e+07	4.49689e+07	6.25318e+07	7.74227e+07	4.72143e+07	7.91872e+07	8.68268e+07	4.8115e+07	6.94194e+07	4.8423e+07	1.1352e+08	7.25616e+07	4.47293e+07	5.56617e+07	5.63004e+07
1.07_520.4488m/z	45107.9	82051	111141	97762.8	67598.2	151026	51688.4	72829.1	66478.1	108512	157336	42553.2	80048.5	47855.4	160261	89906.4	64514.6	118604	83580.4	151475	79705.5	83847	63236.2	48824	42707.2	112364	61442	112175	59412.8	62769.4	62945.5	87290.1	54497.4	69206.2	42650	72250.2	85765.5	87404.9	93296.9	95933.8	105082	68890.6	80482.7	72547.8	132150	139262	70845.4	67733.9	56090.6
1.07_520.5320m/z	68046.1	50491.5	64867.3	57909.1	114894	186669	77559.4	57521.9	115833	102832	129079	41671.7	58252.5	51825.3	60502.7	50430.7	76229	96812.8	91372.2	59351.7	32508.5	29737.5	65594	41904.7	79120	57567.6	68300.9	114132	71817.9	51309.6	69165.3	69602.1	65860.5	83723	39026.1	40074.2	59217	67214.1	43136.8	108055	83518.1	30280	50456.8	37764.4	142088	58781.9	53291.8	78306.5	34313.6
1.07_522.4127m/z	20552.5	28192.4	31526.4	32231.7	69266.8	92424.6	66668.3	94622.7	207299	125072	120424	43452.6	49490.7	34012.3	78263	61503.3	21228	72812.8	37590.3	91937.7	102095	116498	47103.3	83448.9	42597.1	27609.3	62448.3	80196.4	78986.8	62627.4	18435.3	25442.4	42516.2	67588.4	61450.1	52716.4	109461	100132	46814.5	91857.6	98516.3	46739.8	108454	61712.8	87760.4	69255.2	43787.6	37614.9	67876.4
1.07_539.3138m/z	34522.6	67770.7	71702.8	58900.6	67844.2	178097	50311.5	72270.6	104995	76100.7	97114.8	48334.6	60454.8	28566.4	64349.4	60688.1	34483.6	119013	62702.3	98084.7	104108	102220	47010.4	63043.3	40263	43862.9	56531	192806	67834.1	111207	37059.8	55129	50796.3	70095.4	45864.4	43929.8	61275.4	78401.5	44355.2	79362.9	89868.7	46481.3	77422.7	48185.3	150003	90678.1	50959.5	64194.5	72141.9
1.07_578.3866m/z	37978.3	45465.3	38592.3	45849.4	39772.3	63874.7	30735.2	50793	60392.4	49921.7	43731.2	42304.7	40687.2	24442.6	43239.2	52876.3	37349.5	66776.4	62898.5	65643	57706.2	51436.3	38277.6	44238.7	45226.4	37678.6	41995.8	57674.6	42904.8	56537.7	26470.7	44073.8	46029.8	43253.8	36061.3	41704.2	49417.4	48170.6	32731.7	36796.3	53474.3	35967.4	54927.3	45177.5	63652.2	62694.5	53169.9	57003.6	47462
1.07_716.4036m/z	80224.6	84894.6	85627.1	119892	80923	123525	83631.8	94520.3	103116	93509.5	111829	85951.9	90503.4	99360.6	80459.5	81679.8	87314.1	95970.4	107654	102347	116459	105381	72724.7	93367.4	83438.8	80130.5	107624	117557	84254	94036.4	96373	89983.3	80469.9	106799	77395.6	77584	89393.5	91188.7	68936.6	83465.9	111197	97713.4	117175	91807.3	138558	102780	94456	107954	98622
1.11_478.2939m/z	435370	648714	556240	926656	958015	1.11469e+06	549444	742009	731046	1.2477e+06	965089	918069	546458	440067	537049	658479	520964	869176	627322	1.05509e+06	619333	750838	454583	506200	545730	648144	647690	856292	576244	700575	400834	490128	499505	814229	898182	454468	620858	956591	681381	882878	926760	763554	719757	688427	1.06599e+06	592733	454858	528570	555830
1.14_1213.0025m/z	351.126	2457.86	2097.77	3370.44	6230.14	6061.05	5253.22	5212.37	7730.13	9993.76	2293.43	3238.45	33.6743	6259.13	1009.94	765.257	738.415	531.511	11740	13719.8	24692.1	9814.12	15618.8	11607.5	2276.25	9093.84	15079.2	33780.8	305263	37129.3	3412.3	1265.73	4245.13	15721.3	4232.92	6820.37	17647.1	11089.2	2195.63	4246.61	968.921	1483.56	774.041	48.1426	2582.99	10053	6880.48	13929.9	18696.8
1.14_416.3558m/z	337631	292994	229170	250160	261776	366953	365320	381874	463565	335997	566388	1.09274e+06	269080	1.16033e+06	1.26194e+06	749576	874153	460163	1.05098e+06	894738	384226	808851	919567	581357	780411	439659	1.00653e+06	1.08576e+06	843559	426195	277862	352559	306304	321163	324920	315792	318584	788952	375277	767626	791691	764544	449359	1.02578e+06	956448	955629	403914	262016	356601
1.15_545.3492n	1.46314e+06	2.72185e+06	1.78064e+06	3.26578e+06	2.06489e+06	2.45597e+06	1.55131e+06	1.59656e+06	2.47797e+06	2.89159e+06	4.11436e+06	1.7587e+06	2.86966e+06	1.62497e+06	2.41351e+06	2.12103e+06	945943	2.66111e+06	2.25769e+06	2.74936e+06	2.02831e+06	2.60488e+06	1.69587e+06	1.17406e+06	1.53739e+06	1.54303e+06	1.76018e+06	6.37019e+06	1.72529e+06	2.19641e+06	1.28989e+06	1.57326e+06	1.07086e+06	2.29203e+06	2.5495e+06	1.39483e+06	1.92389e+06	4.61033e+06	1.67867e+06	4.14274e+06	2.3377e+06	2.0842e+06	2.53977e+06	2.11004e+06	3.22575e+06	1.52304e+06	2.23299e+06	2.61797e+06	991759
1.16_734.4900m/z	41296.6	32759.6	18028.5	26400.2	21343.8	32683	42363.8	29107.7	40022.8	25855.6	34682.4	32541.2	21054.1	27891.6	26395.8	29463.3	27732.8	36986.3	39173.2	30295	28191.9	30144.1	21027	32724.8	36320.5	48792.3	42466.5	17449.8	19666.4	17799.9	33257.3	27912	26236.9	20230.8	26398.5	25103.4	27891.1	23071.2	39623.6	27981.1	30678.2	22199.5	26804.9	37078	32436.5	35581.5	40107	36399.7	29875.8
1.24_1010.6463m/z	10378.6	61311.7	65157.2	517099	71656.1	48375	72174	36075.1	43537.3	66311.8	101520	31935	77319.3	22292.6	64002.1	98232.9	62696.9	80946.7	84659.6	126964	109674	101176	52704.5	52624.3	58041.9	84504.4	72648.2	124925	98604.1	129186	37622.5	69628.2	48467.9	53323.4	72762.5	23742.9	33946.6	199081	58312.2	82076.3	80035.6	85112.2	116834	64176.2	126876	60158.2	39739.9	165237	31538.8
1.24_1016.6801n	169008	343301	374298	1.79364e+06	377717	617114	212837	288671	357092	604283	772313	296791	418056	83704.4	217749	375789	135321	553544	338231	588868	505593	415620	188502	209570	159039	224106	169982	687389	359205	693339	180888	292205	116621	326389	365540	205993	140267	1.1846e+06	180154	401214	489145	349361	454544	265963	837965	249942	160565	513835	165435
1.24_104.1066m/z	28648.8	36056	30477.6	40140.8	29652.2	29337.1	24331.6	24961.2	25184.1	29614.3	31025.8	32460	29907.4	19479.4	25467.2	27352.7	18718.3	33786.3	25454.1	35773.3	35237.7	24891.8	30576.4	30222.3	28011.2	27511.6	31985.5	37203.8	31122.9	39652	28021.4	25829.4	24310	26051.1	25668.5	28379.6	19330	39342	26372.7	29977.5	31241.4	30063.6	31759.2	28932.2	33796.6	32980.4	26693.4	33752.3	27179
1.24_1044.5977m/z	23784.7	43093.5	72260.6	182175	61827.1	79844.3	27703.6	52880.7	47094.4	87667.7	75667.1	58005.6	27122.2	4317.5	28932.4	45105.1	9275.29	72909	11826.3	77118.3	85177.2	30718.5	26016.9	56624.3	32007.2	44760.4	42443.6	67157.9	57336.6	97292	25277.8	71487.1	20277.4	46492.6	48044.5	36227.7	24255.7	180471	50042.4	51147.3	71555.3	68520.2	55814.9	45197	112525	55313.4	21351.5	76205.6	38319.8
1.24_184.0732m/z	124317	168858	158321	274880	154663	192952	138744	148051	148099	186242	197992	166537	158846	98648.3	135876	163382	117408	184363	152252	204654	177995	168396	136445	145220	140421	147083	131334	184648	155613	185603	125972	160154	126005	141242	151515	150481	116899	243328	142938	168072	169551	159127	181626	145471	204666	152410	137495	207925	129806
1.24_267.6469m/z	47660.7	72136.5	70048.1	93716.9	67078.5	65690.2	54990	56990.4	56286.9	68254.3	73241.3	63126	52001.1	36742.6	51657.6	56548.8	50558.8	68854.2	48913.7	68938.9	67972.3	53835.8	52746.4	60521.8	56496.9	56925.2	50355.6	70682.6	64318.2	74277.2	58009	66267.4	55438.2	53441	57300.1	51033.7	47365.9	92240.6	61806.1	58874.4	62536.4	59813.9	65581.9	62674.6	68584.8	53830.9	53862	79332.7	51601
1.24_313.2735m/z	39543.1	59830.2	55807.9	110112	64533.2	68513.9	58267.4	51474.2	54061.7	62618.7	75358.7	70863.8	51770.8	46669	53871.8	63343.2	57779.7	72394.9	68731.6	79911.6	72915.4	56644.6	53381.9	55855	56614.6	49192.3	47611.8	62368.1	50792.8	65290.1	48872.8	57254.7	58004.4	51353.5	52993.3	45584.4	44000.9	82352.3	64872	59642.5	63405.5	67656.4	60810.4	60563	76937.6	60241	53402.9	64455.9	38433.1
1.24_495.3333n	1.16895e+08	1.66105e+08	153213945	2.93557e+08	1.56069e+08	1.71944e+08	1.38257e+08	1.49706e+08	1.33859e+08	1.77616e+08	1.88706e+08	1.59627e+08	1.26329e+08	8.566e+07	1.22058e+08	1.55868e+08	1.21514e+08	1.63462e+08	1.37856e+08	1.817e+08	1.63155e+08	1.51049e+08	1.2244e+08	1.33972e+08	1.3569e+08	139719507	1.30534e+08	1.66734e+08	1.61598e+08	1.82697e+08	1.274e+08	1.49181e+08	1.27502e+08	1.47501e+08	146917535	1.35552e+08	1.11649e+08	2.38867e+08	1.51034e+08	1.41481e+08	1.60167e+08	1.5802e+08	1.60974e+08	1.40397e+08	2.00928e+08	1.35416e+08	1.27641e+08	2.04306e+08	1.26762e+08
1.24_515.8153m/z	87834.7	90775.7	97140.9	260941	93006.7	102331	80170	78485.1	90040.5	141285	131654	90048.8	84113.8	50060.9	88079.5	107880	89119.4	96141.8	48598.7	191505	120439	94299.6	71200.9	94832	103231	87541.4	92048.8	125961	112410	132252	80392.9	78776.7	53995.6	75571.2	77661.9	71922.6	43428.6	149028	82460.3	77905.9	95422	154844	120137	104908	164434	95422.6	47141.7	140261	100527
1.24_580.2928m/z	246949	339674	306625	420492	302881	306112	277235	284164	288778	330486	333344	326141	283923	217184	260830	297823	252909	315423	257086	324958	309439	287196	260335	284309	286601	277675	278829	315011	301149	319557	255874	304432	264576	283777	301439	275239	251119	401967	312391	295409	326695	304734	324682	293774	365207	295254	259581	372561	273416
1.24_586.3093m/z	84321.7	87453.8	87910	79358.4	90055.2	101412	73967.3	92146.6	77295.3	85784.5	93190.6	90798.4	69285.4	47604.2	62734.8	72948.9	60984.7	86950.3	56082.9	91857.9	83871.9	56089.1	72709.3	78838.8	68722.4	71237.5	71960.5	86925.8	93358.9	103077	87840.6	86708.4	77677.6	71091.6	77641.2	76480.5	66624.6	102319	80379.5	80482.8	81983.5	82182.2	75486.5	78470.2	88896.6	80527.6	64860.1	72693.3	72380.3
1.24_648.2800m/z	12085.8	21471.8	12357.3	16747.6	27803.6	18307.6	15687.4	21838.5	25954.9	18595.9	21266.7	31457.6	19529	16129.1	19848.8	19616.4	19566.3	26572.2	13610.7	18761.6	15045.4	10256.5	20342.4	19233.6	14668.5	20697.1	5540.88	11649.8	12491.9	16131.5	18621.1	28346.6	16149	17691.9	15115.7	18839.7	12645.7	26893.5	20564.2	23108.8	17536.1	14619.5	12852.4	23847.8	19803.7	26141.4	15610.4	21087.8	15877
1.24_690.3696m/z	751619	1.03522e+06	983524	1.5556e+06	973093	1.13414e+06	862219	970405	884489	1.07332e+06	1.22026e+06	986593	825178	480064	726332	968171	696603	1.03548e+06	775138	1.16135e+06	1.04713e+06	833130	718115	858132	860640	861580	826785	1.11573e+06	1.02015e+06	1.17346e+06	817231	979140	752696	903866	917714	837746	650965	1.44633e+06	930127	930496	995822	1.00609e+06	1.00296e+06	864105	1.17767e+06	813949	745031	1.21948e+06	746050
1.24_712.3509m/z	59249.3	46691	57816.2	61365.3	54467.8	70521	41830.4	54721	47069.3	58220.9	53804	54221	42043.7	23789	41430.4	38218.7	31711.4	56514.1	23337.8	50719.5	62566.2	33004.1	44778.7	64459.6	40229.4	37337.1	38396.9	38508.2	42673.9	53009.8	53541.7	52877.1	47219.2	38288.8	41719.2	45786.5	36370.8	68372.8	48965.3	50016.3	40721.7	51736	34309.2	40378.9	46039.3	41911.7	33317.6	40618.5	40386
1.24_763.4809m/z	48212	119472	117752	267755	83488.9	112520	88568.8	88832.6	84225.7	108049	145421	88061.7	77473.2	40953	66517.3	87592.8	69803.7	112640	80955.3	120358	107030	84474.4	63071.8	89896.4	91806.4	90185	82573.3	119535	95715.1	131094	77772	112176	73936.9	97859	93712	78782.6	52715.2	203021	93780.7	87493.5	87370.5	111991	97981.1	89536	136416	73877.4	71629.6	136639	64770.9
1.24_779.9836n	34929	97947.8	115997	415846	122954	140516	88337.8	92643.3	83411.3	135813	147135	80934.3	71307	15075.2	57080.3	104314	41434	109381	78112.9	168302	145329	127140	78364.5	72565.9	91027	106526	103097	135477	105005	182404	68802.5	103499	54522.4	106002	99102.3	67177	39426.8	244556	81772.6	94460	113296	111572	121750	78922.6	174251	50008.4	48015.4	197971	57925.6
1.24_979.6178n	3.30063e+06	6.91089e+06	4.03658e+06	3.62419e+06	3.98744e+06	3.99302e+06	7.58462e+06	3.23862e+06	5.47418e+06	4.62157e+06	4.68461e+06	5.4422e+06	7.55958e+06	3.76217e+06	6.38599e+06	9.13998e+06	6.84137e+06	7.08746e+06	1.14202e+07	8.35313e+06	6.27424e+06	1.22937e+07	5.45269e+06	5.22291e+06	7.61215e+06	6.27676e+06	5.70967e+06	7.93963e+06	6.06385e+06	4.36907e+06	3.89692e+06	5.51959e+06	4.99342e+06	6.72498e+06	6.61753e+06	4.27007e+06	4.4492e+06	4.19071e+06	5.4323e+06	7.41699e+06	7.29495e+06	5.79605e+06	8.73551e+06	5.43953e+06	6.5854e+06	5.74275e+06	6.47369e+06	1.52288e+07	5.35211e+06
1.24_990.6678n	3.06335e+06	7.0991e+06	7.19662e+06	2.72128e+07	6.10078e+06	7.79712e+06	4.79467e+06	6.01978e+06	4.90761e+06	8.75635e+06	9.97434e+06	5.62989e+06	4.24663e+06	1.46697e+06	3.50253e+06	5.75655e+06	3.33551e+06	7.57833e+06	4.93308e+06	9.38287e+06	7.61768e+06	5.89909e+06	3.50593e+06	4.60273e+06	4.8327e+06	4.82467e+06	4.42709e+06	8.40193e+06	6.33704e+06	1.0169e+07	3.84733e+06	6.11239e+06	3.43662e+06	6.07811e+06	5.50708e+06	4.19456e+06	2.54741e+06	1.45829e+07	4.92405e+06	5.15847e+06	6.67629e+06	7.50125e+06	7.05338e+06	4.96948e+06	1.05098e+07	4.18399e+06	3.55788e+06	1.11716e+07	3.51834e+06
1.25_1071.6079m/z	25836.4	60935.5	53819.7	52677.7	117601	98050.2	32364.9	88525.8	44378.3	40526.8	78194.7	69904.3	27107.9	23018.2	15490.4	57620.7	27272.4	57170.9	35622.4	42074.8	28846.9	38463.7	28027.3	67160.8	18976.5	27517	28700.5	56635.2	61830.9	69003.6	68060.5	82706.2	26554.2	57122.9	49958.2	49752.8	27816.1	68459.8	56247.9	60205.2	43578.2	44214.7	31341.7	28876.4	58360.2	28322.8	18715.5	73007.4	42141.6
1.25_1075.6280m/z	5435.66	23106.1	15877.8	27059.8	11195.6	29822.2	11072.1	8614.76	5270.95	29629.2	33943.7	50159.5	12708.6	10290.3	18787	27644.2	17822.7	33846.1	15197.8	28969.8	11322	11677.3	9443.26	23818.6	2566.96	12737.2	12539.6	18093.7	13190.4	10248.5	11140.1	22146.4	7801.65	10734.6	16182.9	16505.4	13545.2	31080	7420.54	5706.07	26604.7	26734.7	41424.2	25791.3	35454.3	25313.6	24751.7	17500.8	16506.3
1.25_496.4440m/z	1.99221e+06	2.84409e+06	2.57351e+06	4.94826e+06	2.74496e+06	2.95008e+06	2.79151e+06	2.55944e+06	2.60765e+06	3.71564e+06	3.23347e+06	2.75415e+06	1.88127e+06	1.4483e+06	1.9273e+06	2.55938e+06	1.71691e+06	2.68254e+06	2.09417e+06	3.01941e+06	2.87324e+06	2.35733e+06	2.56263e+06	2.07585e+06	2.20399e+06	2.11578e+06	2.25794e+06	2.11094e+06	2.71284e+06	2.73343e+06	1.96349e+06	2.21361e+06	2.49203e+06	2.59635e+06	2.86163e+06	2.17722e+06	2.14604e+06	4.513e+06	2.79968e+06	2.67297e+06	2.45038e+06	2.2693e+06	2.56252e+06	2.32018e+06	2.76928e+06	2.37656e+06	2.29432e+06	3.30061e+06	2.05765e+06
1.25_496.5394m/z	122937	213428	229264	1.75083e+06	212998	343917	137122	225433	170495	484454	494679	264306	145096	77998.9	128163	216224	120891	229416	122254	252790	191428	123755	119745	123129	163708	182387	179226	228413	210788	215822	138328	189820	139540	217677	205513	151603	108539	1.00354e+06	216973	172820	239758	285420	217291	187166	460932	146337	123270	291628	104240
1.25_497.2378m/z	24406.9	45412	36354	69739.4	30473.6	32470.2	37679.1	22778.6	25394.9	45193.9	50035.7	25093.7	31980.1	19929.6	52099.4	40758.7	16287.9	43164.4	27389.9	29073.8	46977.9	31432.9	11181.1	19995.9	23826.6	24059.2	12750.3	21830.2	28328.6	26945.4	28606.5	34266.5	15614.5	28537.2	23569.7	23111.1	29880.9	43693.5	33675.1	40169.6	33016.4	48587	21585.9	41604	54003	28711.7	33479.5	40211	58710.4
1.25_515.3138m/z	208093	293700	227482	572163	199238	338095	266293	263681	215409	392184	405531	309853	290676	216186	313338	333969	305914	409654	319673	342857	247641	340741	226680	253175	335659	251591	269606	308302	286242	362111	218279	253247	231461	266704	241919	254171	211722	466009	317442	316760	398397	452664	442455	336762	516348	317224	271502	348807	200750
1.25_757.4550m/z	10435.2	50675.5	20892.5	25909.9	17688.8	17046	24979.7	10995.6	33010.8	27632.1	40346.5	44088.7	20985.6	24054.8	39311.3	54064.8	16925.8	38104.7	43268.3	64583.5	38105.6	81181.6	47774.4	49808.5	91943.6	73179.6	60116.1	90881.9	62197.2	29152.7	20958.7	32749.4	15618.7	38952	24593.1	20416.5	24857.9	23152.2	46417.9	51655.9	46740.1	49984.7	62819.2	41038	49722.9	23653.3	33318.3	80582.5	23000.9
1.26_498.2845m/z	189421	307454	276889	449072	220661	247447	206165	222489	218202	233726	282020	309100	238335	131741	208356	264439	238182	219349	227554	318794	319585	298727	191392	253433	246732	305027	233407	423128	283890	425070	226980	272307	186959	258084	209540	274291	166593	368556	252580	190235	293500	285565	244760	241836	335863	216899	186531	336921	230266
1.27_270.3155m/z	378684	372560	280690	233456	335343	452978	389863	370302	469635	347000	637174	901929	428512	1.17814e+06	1.3501e+06	1.04184e+06	970998	582530	895014	1.07328e+06	455602	799505	947000	820269	959580	561923	1.16158e+06	974778	901912	544086	368238	383942	415823	413636	502955	410782	497992	680155	505850	727627	831164	838843	476338	1.07229e+06	807300	1.07547e+06	604486	305647	495871
1.29_1005.6307n	98371.2	263579	110656	318833	125281	210219	239401	131670	288687	276641	373487	229785	657728	112395	351004	529068	269721	526882	841316	523873	408882	909730	304684	208153	242957	300163	202825	626168	278524	216159	91819.9	225051	129612	288049	291740	161865	127677	333235	143655	502704	509598	293226	492838	238672	417015	331520	260277	843945	188046
1.29_496.4057m/z	201241	280155	463792	790602	286662	584674	305027	487496	206987	299158	303708	259899	195362	151235	137548	127800	139855	230545	145615	302501	571419	429453	378015	294683	320005	304690	365429	283417	373942	307655	252763	252652	397051	462760	186297	302757	181766	393441	186616	267005	190736	205895	170827	187810	174924	207530	191354	379450	308700
1.31_453.2845n	138117	175028	178655	454485	264085	215535	183451	192536	182755	225737	245985	270263	121034	105313	136114	171239	136665	195453	207550	272499	167963	207820	104471	131614	167729	161810	126484	183308	195120	186626	138020	196253	146301	181842	216796	94100.6	100305	317124	185249	151899	149537	221973	195808	147312	276165	132762	124022	135924	122187
1.31_522.3563m/z	1.80228e+07	2.65867e+07	2.6807e+07	4.48123e+07	3.11836e+07	3.84846e+07	1.97485e+07	2.60137e+07	3.13658e+07	3.41764e+07	3.79205e+07	2.60383e+07	3.8856e+07	1.56159e+07	2.47241e+07	2.76922e+07	1.40433e+07	3.79046e+07	2.72197e+07	3.49027e+07	3.60583e+07	3.00195e+07	2.28561e+07	2.04433e+07	1.70566e+07	2.43455e+07	2.15492e+07	4.13091e+07	2.728e+07	3.43367e+07	1.89395e+07	2.35523e+07	1.55979e+07	2.28709e+07	2.54957e+07	2.43564e+07	1.65349e+07	4.31106e+07	1.77995e+07	3.00362e+07	3.64908e+07	2.31408e+07	2.91189e+07	2.36949e+07	3.98488e+07	2.81868e+07	1.97993e+07	2.94226e+07	1.99894e+07
1.31_522.5065m/z	10663.1	21611.5	13655.9	45406.7	21145.1	20337.6	15036	14261.2	30324.2	25765.3	21012.1	26501	25001.6	3435.03	20179.2	16417	5408.14	32404.7	7925.73	21581.6	32329.9	30076.2	6068.77	18830	12233.9	8778.44	9749.11	34176.9	15995.2	15658.7	14414.9	16984.7	14119.6	10550.8	24362.5	15646.7	5174.76	36861.2	9688.05	26522.6	26444.1	15758.6	15863.5	12778.1	27990.6	12893.1	13091.8	17907.7	18660.3
1.31_606.3087m/z	52594.8	78981.6	72018.4	110284	90487.7	99903.8	63114.2	76077.7	86368.3	90965.1	97854.4	81891.4	106871	50161.6	73047	70952.2	55199.2	96171.2	71853.1	93755.4	94940.1	85353.4	64972.5	60366.7	56277.3	70139.8	60446.4	114412	73857.8	96455.4	56133.1	64930.5	55975	72230.5	66421.4	77004.8	60549.4	113172	59015.7	90328.8	94590.7	64998.9	85521.5	64093.9	97775	81840	62341.3	76360	61583.3
1.31_716.3847m/z	55363.5	91496.9	93962.6	279936	131028	185747	76448	119805	114244	140172	183331	108900	158729	35993.9	86606	109720	54538.1	167221	117686	171196	168692	108758	87336.1	66554.2	75292.4	79940.1	63289.3	188924	93363.1	152449	52859.3	98188.8	42750.4	94874.2	98555.2	61631.1	50002.6	220495	76222.9	140939	157209	115265	133845	95234.6	164415	114431	66409.7	123440	45887
1.33_242.2476m/z	46966	37266.6	33299.8	27772.2	42332.4	50378.6	59547.2	52948.8	63596.5	55363.8	111056	182674	52558.7	189880	208975	147525	177777	124116	295108	236007	67510.6	171439	163138	107872	176778	73889.5	191834	185031	81630.8	79874.7	38649.8	44532.4	46603.2	53136.2	61417.9	44445.4	59947.7	112548	70224.2	139658	116460	137931	80817.9	196609	185745	206686	106248	61779.7	65103.2
1.33_841.9718m/z	25331.3	20155.9	59569.3	43208.1	30925.3	54322.2	36012.7	40886.3	34912.6	8562.57	14249.5	21336.2	20275.9	34377.3	13095.4	11981.4	19242.4	7405.94	11992.6	59333.4	50246.2	36491.9	119021	77172.4	21064.1	60508.2	95523	34648.5	5507.34	10242.6	36196.8	29824	26774.7	107836	28656.7	47156.8	28124.4	17192.8	12873.6	11245.2	22110	40679.2	14161.8	19701.1	5905.01	17204.1	30210.7	23167.7	58173.4
1.36_360.3619m/z	7533.19	2111.2	3729.26	15199.1	1996.34	4930.9	2745.45	6556.89	9146.63	7817.47	11288.4	17557.9	3466.92	2129.97	3146.77	3391.57	194926	3324.99	1302.88	15725.4	5076.43	16504.9	3361.84	15584.4	486.903	4666.05	1429.12	1726.77	4972.79	1281.93	3234.7	1756.78	27911	2447.24	5274.65	20306.3	2947.36	3828.59	7178.88	5466.62	4896.32	2031.56	15712	27104	15310.6	19586.2	4851.22	5795.22	1507.7
1.36_480.3053m/z	162657	205003	200314	349028	258944	303145	172322	256299	221143	295299	400475	262575	240869	145401	181425	245927	165173	316881	201060	293516	250927	222861	139577	164889	155039	193695	192277	296282	180823	327016	145759	163437	145644	211545	271131	194865	142584	309408	162148	232961	297135	245422	238240	240981	400579	205883	150696	251774	145600
1.36_540.3651m/z	146724	123812	152890	161967	128042	130634	135180	105402	130121	158251	137948	143317	148078	117747	154531	146444	119220	118934	127300	129635	134883	165911	142443	120867	151098	129383	135203	138479	145076	178620	112545	226649	125639	171783	149953	100593	117334	135229	141619	118759	121124	110205	160253	164727	161018	141254	136561	93410.6	93563.7
1.37_767.4193m/z	88927.1	54831.5	45224.4	61323.2	66457.7	67686.2	62633.9	76473	85811.3	93786.9	82381.5	78922.3	76400.7	54013.7	80551.5	61472.6	93946.9	111834	126468	80971.2	74808.3	76821.3	62315	73687.5	69368.5	78195.1	74815.9	73162.8	98298	78194.2	70452.9	48929	69936.8	65069.3	73794.3	81640.5	67045.8	68220.5	82814.4	63116	66502.2	75833.5	70528.1	83678.7	78697.9	101746	104703	84962.6	68819.3
1.38_351.3132n	414726	366129	285908	280651	179680	358823	546910	247757	545011	377382	551546	219952	478469	350578	525538	303455	450804	219358	427402	218876	273130	301026	216155	233282	234361	294632	157478	260662	288695	258471	221876	146870	573347	340181	693434	517696	537890	449698	298533	343925	366102	281275	538885	538087	277126	410515	190862	294077	335620
1.38_480.3444m/z	850319	1.03248e+06	1.12291e+06	2.044e+06	1.14359e+06	1.41003e+06	945719	1.62085e+06	1.16559e+06	1.20466e+06	1.31752e+06	1.17431e+06	1.09126e+06	698156	955782	1.27711e+06	788505	1.56781e+06	1.12065e+06	1.28604e+06	1.48895e+06	1.37666e+06	897304	1.11289e+06	859171	637432	972108	1.32175e+06	1.11066e+06	1.94912e+06	774573	971143	805723	1.05047e+06	1.07562e+06	987745	779164	1.31278e+06	880142	1.00506e+06	1.5673e+06	910040	1.44726e+06	1.16419e+06	1.9393e+06	1.23849e+06	735452	1.91076e+06	771767
1.39_548.3712m/z	379026	493405	441441	712786	465759	748880	465934	498637	474041	664548	679762	457473	552341	320796	430552	466206	304179	585093	405554	568512	546160	637726	401882	354530	339553	328326	433631	642248	407632	542174	314317	503874	327772	563582	542112	408746	395636	568103	382957	603666	602877	423563	484174	453681	625101	432749	399083	555523	364713
1.39_775.4307m/z	92475.6	83057.7	171639	176010	100479	158508	115619	109526	77958.6	135986	119345	63532.8	99880.5	93063.4	96275.5	83407.7	84604.1	87869.9	107442	102880	105271	61343.3	83799.5	103692	119130	89577.8	133792	88142.8	87178.4	102543	141995	109533	105315	159107	98778.5	156190	118980	98351.7	88863	98487.6	132445	122466	57730.2	128853	101171	71485	99376.3	74314.9	94634.9
1.41_580.2363n	3113.77	2832.23	2748.07	2179.23	7644.12	3175.93	3828.75	2176.25	3257.98	2923.75	3247.05	3743.84	2188.8	2690.67	2974.43	2488.69	1953.7	2038.87	1926.71	2692.32	1844.85	2420.43	2274.9	3802.27	1712.78	1474.19	1414.66	1646.78	1886.4	1331.73	3532.96	2227.79	3738.61	4669.82	2421.76	3779.54	3534	2132.44	1969.26	2978.74	3308.55	2351.04	2934.98	2137.07	3312.74	2807.41	2155.79	1396.66	2483.19
1.41_735.4021n	35417.3	24318.8	39788.6	53159.8	46549	58489.2	43183.6	37562.4	26711.3	42169	27376	38615.9	35491	51564.3	19879.9	29825.9	24087.6	32211	23787	39828.1	50043	34787.2	28126	41833.5	35073.8	43026.4	43104.1	25282.2	39574.2	41542.5	37309.9	41660	49105.6	52231	28215.2	43388	29471.5	45177.8	28132.1	34942.3	45630.3	44658.3	35284.4	36993.9	28210.9	24635.5	35252.6	20763.8	42853.3
1.44_525.3078m/z	98660.5	75864.6	104425	126177	96605.8	93508.9	87344.4	105213	85821.8	82653.8	86260.8	68526.9	74312.6	89338.2	81600.5	71839.9	80463.6	70350.4	72030.6	77468.8	87819.2	92626.1	79812	94581.5	78816.9	73596.8	101232	68994	86734.7	80842.8	100642	112041	108608	107413	93632.3	92281.6	89444	79699.1	70157.2	69605.2	77993.7	91802.2	72749.8	74896.1	93389.7	76396.9	96396.7	79770	109167
1.45_482.3616m/z	897185	1.09655e+06	1.23475e+06	2.49836e+06	1.38509e+06	1.2784e+06	1.10679e+06	1.73366e+06	1.29464e+06	1.32249e+06	1.42209e+06	1.20998e+06	1.17159e+06	798643	1.06496e+06	1.15441e+06	889934	1.75079e+06	994281	1.32274e+06	1.56642e+06	1.25545e+06	1.04829e+06	1.22901e+06	819178	966267	1.09043e+06	1.44776e+06	1.15079e+06	1.49979e+06	1.02618e+06	1.13795e+06	1.12477e+06	1.01539e+06	1.06242e+06	1.07909e+06	1.30834e+06	1.61622e+06	951014	1.10675e+06	1.74248e+06	1.16722e+06	1.28504e+06	1.13379e+06	1.56636e+06	1.09967e+06	870736	2.29711e+06	984135
1.45_506.3604m/z	92179.1	90833.1	98665.5	153473	115962	116728	101924	138889	102465	125636	124823	120578	95857.4	84716.1	96150.6	119477	70398	153986	108784	107292	131073	134952	87542.6	103184	81933.9	58444.2	82527.5	108910	102813	168274	90103.7	101123	83675.7	117594	101038	109784	95399.9	109758	97982.3	105340	138752	87151.1	137615	115210	149155	127982	70255.5	164169	80162.3
1.46_510.3564m/z	1.36113e+06	1.95142e+06	2.27576e+06	2.97605e+06	1.15075e+06	1.8534e+06	1.59845e+06	2.35151e+06	1.44977e+06	3.34e+06	2.46787e+06	1.3631e+06	1.76291e+06	1.39936e+06	1.39663e+06	1.56888e+06	1.33923e+06	1.62622e+06	1.51969e+06	2.11082e+06	2.28016e+06	1.69236e+06	2.56965e+06	1.62526e+06	1.56853e+06	1.2017e+06	1.32529e+06	1.91372e+06	1.78012e+06	2.56879e+06	1.66326e+06	1.72197e+06	1.48181e+06	1.37283e+06	2.41133e+06	2.59742e+06	1.15458e+06	1.85617e+06	1.42849e+06	3.78714e+06	2.42249e+06	1.54668e+06	2.45204e+06	2.03281e+06	1.78485e+06	3.28076e+06	1.59723e+06	2.71656e+06	1.80845e+06
1.47_676.4682m/z	70852.7	58620	70786.6	78318.9	82576.5	65908.5	69188.5	84183.8	60886.1	64742.3	80916.4	89404.2	68864.5	70571.5	73901.5	66735.1	59875.8	58933.9	73183.4	47090.9	46978.3	45981.9	45326.1	47154.6	41153.6	42339.6	34175.9	41282.3	38879.8	39209.7	62979.3	74024.7	72330.7	73538.2	71938.8	86691.1	62435.6	77114.8	82233.1	82497.7	68010.8	70631.1	65313.2	58497.1	47230.1	51493.3	64573.8	62962.5	50571
1.47_679.4183m/z	623310	630916	711334	638344	747248	586791	570110	573615	653135	497852	629540	659921	464511	540926	557800	614608	490129	653976	653221	441104	513747	578730	377709	479831	438644	459270	423741	460747	522192	488823	701327	613265	804015	542423	633716	602353	540461	483057	607599	668798	476225	571838	543053	556598	486640	620489	642427	664070	481418
1.48_300.1949n	19196.5	22899.7	30542.3	28175.5	32180.9	28347.1	22247	24787.1	19231.8	33390.1	24244.3	31441.7	31234.4	26700	38903.4	27968	32828.6	34391.7	43675.7	33013	41049.8	46947.2	45392	39013.2	35023.6	32910.6	33610.3	32113.4	42069.5	32821.5	35034.4	25569.3	31582	25682.7	25248.7	29537.9	31565.7	24522.1	33791.9	25055.6	29238.9	23042	35217.2	27268.3	33050.5	35945.6	38341.6	35912.9	29580.3
1.48_364.2157m/z	7466.99	4863.24	6023.71	7865.57	7855.19	11369.2	5689.35	11382.5	4925.55	13518.4	6087.59	6917.58	30286.9	14554	21708.5	13564.7	17371.4	9798.36	19942.6	21917	27697.3	19441.4	40323.2	24499.7	23522.7	25631.6	25206.5	23340.8	31710	32290.2	7986.85	6043.66	3116.78	8021.35	2981.76	8427.7	15552.1	7972.57	14638.9	6348.16	18073.6	7660.32	20608.7	13038.9	16491.9	12066.1	17172.6	12367.5	28102
1.48_438.2980m/z	26452.7	34946.5	42129.3	61176.8	40300.6	49855.2	30340.6	44227.3	35858.7	37985.1	43288.7	30841.8	32489.4	20831.9	26196.9	29922.2	26761.4	51229.1	30389.1	43230.1	50497.8	39627	33662.5	34439.3	30318.4	29080.5	35209	39289.3	33000.7	47170.2	32473.2	34446.5	34340.8	38542.8	30271.7	33815.7	26711.4	48011.8	24786.7	26037.2	35614.7	31991.4	32988.5	26617.6	53434.6	36297.9	24434.2	100722	28257.1
1.48_559.5202m/z	11449.9	5253.27	16488	33237	6729.87	40557	2252.72	46036.4	2665.06	79967	9696.58	9310.9	290096	80312.7	162791	40884.2	101419	49610.3	146714	201427	320600	196597	684264	237668	303075	235185	237801	231420	349632	328951	14856.1	65057.6	3999.98	20155.5	4543.45	35571.6	98820.8	15227.7	74137.3	3286.19	130518	20209.5	201854	52078.4	78508.3	41874.9	87922.5	61426.7	299810
1.49_709.3937m/z	76014.2	71148.9	102877	121030	86315.7	85382.4	87764.9	100485	82112.4	89407.9	70399.4	69675.4	96196.8	76354.3	63526	85520.1	85253.3	61873.9	102273	102624	104509	88248	81982.8	80953.3	92608.4	59378.6	90235.4	70913.9	88081.7	57164.8	92986.6	92901.1	87093.2	99139.3	78480.3	83876.7	97347.7	99375.4	80143.1	83568.4	95621.6	104385	106016	81401.6	91606.6	59435.5	82907.2	62065.5	84375.3
1.50_403.3535m/z	34215.9	38808.8	30170.3	24325.9	21495.4	24550.5	51651.1	13516	33131.8	20803.7	34459.7	5181.96	21827.1	21378.6	35386.2	14549.7	6798.98	12491.4	26031.8	13558.3	18927.6	17914.4	12076.6	9584.21	10037.6	11067.6	7245.2	18607.3	11568.1	21639.6	27804.6	24572.4	51494.5	21226.6	50705.3	13788.8	29585.9	36667.3	18302	16977.7	16598.2	11285.4	21614.1	14778.9	13188.5	13066.4	7198.73	8589.54	19609
1.51_508.3768m/z	511504	456268	716401	1.50929e+06	916945	777951	597731	919623	705952	854751	745306	650495	674215	489925	586125	665905	477794	982200	594557	746269	842988	758512	571672	574734	446396	442793	583133	653182	628886	847430	449373	611278	611481	644668	596468	677512	672567	703653	506368	636384	1.00883e+06	649258	735828	622685	917706	714925	464797	1.26963e+06	617108
1.52_536.3711m/z	53285.3	50404.7	72702.1	91447.6	51382.2	80115.5	54424.3	79494.8	56237.7	105402	87322.7	52362.4	71708.1	55233.8	59858.6	63583	47980.7	71486.6	55260	73635.6	80905.9	66832.8	71970.4	55273.7	51097.9	39369.4	50502.1	83353.1	64076.7	80531.7	57855.2	59099.6	49131.6	58172.4	72451.2	79690.2	51234.9	76241.7	49878.4	90326.8	90214.2	57602.6	78730.9	63029.1	78856.3	95744.3	55016.3	76692.7	72890.9
1.60_368.3404n	69489.2	67036.3	63621.6	62525.9	73390.9	63840	69274.4	63071.6	69089.4	63938.6	62770.1	73176.9	70192.4	69627.4	70709.4	77803.6	79901.3	68166.6	95151.6	80704.1	71448.7	82379.3	85009	80305.3	77723.9	68806.4	74274.5	68430.8	70779.1	68254.7	69987.3	72415.8	64319.9	56602.1	69301.7	70329.3	72519.4	69845.3	72601.1	75593.7	74069.5	69855.2	70841	75444.2	61631.9	85644.3	72791.5	78069.4	71302.4
1.60_403.3524m/z	25702.3	26056.8	15696.4	8157.93	8840.5	8810.9	27396.8	5515.95	15663.8	11943.6	21533	2818.86	16173.3	15756.2	29270.6	12304.2	5437.8	7992.97	22026.7	8934.24	15322.4	13101.6	11508.9	7960.68	9959.95	8959.74	6354.56	12120.2	11323.7	20528.9	17700.2	11561.4	27888.5	8319.52	30150.3	9803.87	16500.6	23682.7	9974.91	12357.5	8643.52	9284.86	19336.9	13639.1	4237.42	10006.5	7063.89	7311.58	14750.2
1.60_718.3995m/z	12853.8	16133.3	24277.1	37317.5	21436.1	17488.9	18787.2	12800.5	12307.3	25310.3	12655	14951.8	13718.1	6638.11	14831.7	16445.8	4677.38	16397.4	12656.2	18297.1	14618.8	14749.3	14223.4	9671.94	13092.9	8981.13	11477.5	14474.7	11230.3	19771.8	8449.71	19845.2	7703.66	16122.5	19494.9	10145.7	10144.1	20180.6	20013.8	16581.8	9975.86	11220.7	14904.7	11718.2	10124.9	16352.3	13838.5	19170.8	8236.06
1.61_184.0729m/z	18457.3	34673.1	35286.1	66886	33806.6	28615.3	29786.6	25295.1	23459.8	36483.5	34126.7	36064.1	30023.4	16410.2	26464.5	31104.5	23642.7	32045	26054	36638.9	28649.3	25179.3	22886.1	21718.9	27036.6	20797.7	20961.9	27246.6	23559	34654.9	20474	29817.1	18054.2	29281.2	37963.6	24415.9	22517.5	40497.4	28681.4	34358.6	28437.7	29372.2	39018.2	31232.9	28703.5	29717.5	28264.8	40819.8	19276.2
1.63_628.4994m/z	87984	43942	25275.4	44069.8	62024.9	22284.4	132360	67844.5	83797.7	149105	155784	304627	54099.8	365984	490108	203941	318969	144840	409559	277825	118509	278203	240118	126699	227759	77373.2	213136	240013	176028	58468.5	55447.2	68587.1	64305.5	51329.3	89453	64097.3	75650.5	168954	119931	246462	229103	263336	155341	376462	295533	330980	96533.3	66360	65069.9
1.69_319.1903m/z	40684.9	35647.5	41477.1	35985.1	27634.3	43705.4	57804	46491.8	70782.2	54434.7	102373	168052	69769.5	217945	229536	172414	135044	93819.7	175846	195488	75669	165504	132226	86803.8	132701	70727.1	165731	151308	114944	62411.3	45390.3	49917.1	52224.6	44133.7	46917.7	46694.9	51436.4	107123	73938.7	138842	126885	151245	101746	194264	176530	160716	71859.8	50707.2	49845.9
1.69_467.2811m/z	71503.2	66172.9	58881	58918.9	64311.9	81379.5	76033.2	88031.8	101194	70281.4	124230	182467	90442.1	230388	236888	189199	185455	105055	227278	208561	102912	212118	187528	129864	198411	118619	201378	229897	148776	95582.4	78005.4	73165	79877.6	67692	81635.5	85657.7	87129.1	129574	101503	161136	157715	183396	97930	207047	196060	195022	108122	87524.8	76282.5
1.69_672.5256m/z	42915.4	19422.6	21557.3	63989.1	30997.3	19634.2	80178.8	30085.5	37622.3	65080.5	39948.3	116673	25703.9	31101.1	41088.9	27250.1	67644.2	34082.7	61485.9	57475.8	47987.3	41421.1	26015.4	32103.7	33061.6	55534.4	27926.2	35008.7	49128.3	45063.1	25906.6	28796.9	58607	9371.19	24753.3	27643.5	25148.7	30998.8	27804.1	47898.5	39829.7	39614.8	34791.6	144829	41896.2	53478	27163.7	37916.8	13624
1.70_489.2637m/z	41510.8	50735.7	45736.2	38490.8	43583.6	40368	47897.8	57149.6	60687.7	54172.4	76124.4	122625	48138.1	137817	148772	108459	94004.4	57232.9	125586	107341	66529.2	109930	96269.3	70090.8	95946.2	55204.3	93597.6	99779.3	90138.3	49244	55308.7	51629.1	46826.7	45484.4	59162.6	52137.5	54476.5	103769	67095.3	98058	78850	103556	57738.8	119362	131996	111679	60906.9	44010.1	60447.2
1.72_357.3110m/z	62783.2	46686.3	39332.8	35148.1	44495	62786.4	83196.7	78854.4	82496	64326.6	127376	205369	60368.5	270906	282547	172520	192648	108440	225043	225163	108569	194535	215118	134398	207129	103264	274947	262047	204269	104678	47766.6	78425.3	59896.7	65175.4	57117.6	66098.6	72771.7	151178	83809.1	164028	161321	193464	96238.6	245774	223556	221499	100104	72001.9	79848.5
1.72_582.4222m/z	41176.6	45865	69800.3	87504	192888	75986.3	77379.2	47847.3	47180.9	87688.2	118509	79800.8	52118.1	23903.4	47427	54160.3	55360.6	62412.9	53621	82845.6	51126.2	71551.8	59587.4	54560.2	56331.5	55905.2	53422.5	46959.4	44253.8	55325.6	33475.8	38354.9	38706.5	53815.5	61711.4	35526.5	38822.3	60695.9	39530.2	52301.1	37985	72099	95513.1	126158	59546.9	66031.8	71366.9	113458	41169.3
1.73_104.1063m/z	8190.98	11527.7	10473.9	19292.7	10693	9935.53	9114.23	9866.92	8377.99	11430.6	13408.7	11409.8	12433.8	7312.43	6260.88	13554.4	9160.28	12949.6	5825.38	11154.8	12500.8	11245.5	7663.92	10020.9	13022.5	10737.9	9484.4	13021.8	7788.57	14901.9	7644.43	12092.5	7369.36	9335.33	14342.9	10161.5	7179.59	13104.1	10130.9	9462.8	11494.3	12375.8	11702	10320.5	12727.6	9413.64	10258.7	13210	5575.81
1.73_1046.7300n	49852.5	256856	598740	3.70101e+06	252097	194245	212462	196186	140658	955031	585124	233378	345343	22296.2	55577.7	269901	87040.2	388622	91565.6	611596	589675	149606	171671	84522.6	280203	149208	91638.3	399351	101372	1.34811e+06	31521.7	205219	33721.7	346285	566621	55542.2	27077	837710	162926	406247	216744	524329	424417	274471	201267	119973	82904.7	595239	64407.9
1.73_184.0729m/z	25220	33701.7	37346.2	70751.8	34367.1	31036.6	29837.2	32206.6	27513.7	44098.2	40217.5	33575.1	34237.2	18030.1	25235	31354.1	24559.5	34627.7	30248.4	39500.3	33386.2	29952.7	34306.8	27468.6	31951.7	28746.6	28635.8	36565.7	31636.4	47085.2	21351.8	36496.2	24944.2	32667	39066.1	25852.7	22691.6	45644	30338.6	36555.2	34553.6	32311.4	36643.7	31249.8	33975.3	31480.9	30950	39260.6	25575.3
1.73_281.6624m/z	9767.74	30571.2	36020.7	63019.1	26426.2	29000.5	25103.3	29771.6	29990.1	47515.8	39270.1	32242.1	32811.4	5581.07	17520.5	27463.9	23958.6	32837.4	42159.5	56816.9	52109.5	39196.1	30878.9	23928.9	27996.4	27793.4	20959.3	29626	22192.6	43300.1	21344.4	20603.2	18727.8	28878.9	43018.8	28968.8	11885.8	47192.4	28234.8	31616.3	26790.9	25943.8	29718.7	33025.8	31998.4	35007.1	29070.3	60087.6	31751.5
1.73_341.3042m/z	16293.7	26711.2	23002.1	53295.8	29830.4	34209.6	28071.4	33787.9	28196.5	44239.6	36200.4	36394.4	30579.5	21379.8	28569	26164.5	22130.9	33360.7	30636.9	39011.6	33553.5	31286.9	30221.2	28297.6	30132.3	29235.7	25647.2	40451.4	26871.5	37301.8	24090.5	24580.9	17091.5	28684.3	34365.7	24435.2	24231.1	35486.4	34338.6	33980.9	30471.9	34109.9	29389.6	32645.5	36477.4	30119.9	23348.6	25833	29566.2
1.73_487.2800m/z	110777	173707	231702	455311	168559	175730	149391	160005	136104	262627	231286	184363	186954	82118.1	133624	182057	129486	195433	136679	227672	200174	147156	158049	128683	175586	140808	147107	208138	138132	282772	105376	158532	97471.2	182833	231480	124755	103940	266705	151379	212580	176589	205760	187522	176063	179949	147026	130830	225876	113124
1.73_523.3652n	1.50447e+06	2.50084e+06	3.37123e+06	6.63462e+06	2.45518e+06	2.46009e+06	2.24075e+06	2.35538e+06	1.99513e+06	3.7477e+06	3.18517e+06	2.49805e+06	2.66245e+06	1.03085e+06	1.71178e+06	2.48174e+06	1.696e+06	2.67069e+06	1.95628e+06	3.05793e+06	2.93972e+06	2.13389e+06	2.03618e+06	1.80022e+06	2.34821e+06	1.97454e+06	1.93508e+06	2.68932e+06	1.99947e+06	3.98085e+06	1.52968e+06	2.33108e+06	1.3703e+06	2.65245e+06	3.32926e+06	1.74419e+06	1.46674e+06	3.76685e+06	2.18425e+06	2.92079e+06	2.40424e+06	2.85075e+06	2.82119e+06	2.38054e+06	2.38009e+06	2.02179e+06	1.87152e+06	3.35061e+06	1.50685e+06
1.73_524.3720m/z	4.30251e+07	6.01035e+07	7.00047e+07	1.26383e+08	6.10624e+07	5.92863e+07	5.44377e+07	5.76056e+07	5.12834e+07	7.99959e+07	7.08699e+07	6.15201e+07	6.16964e+07	3.22383e+07	4.30263e+07	5.67183e+07	4.41467e+07	5.85548e+07	5.05898e+07	7.065e+07	6.76119e+07	5.43392e+07	5.24381e+07	4.69426e+07	5.71898e+07	4.90903e+07	4.92407e+07	6.3335e+07	5.10917e+07	7.98909e+07	4.26123e+07	5.81172e+07	3.93793e+07	5.96614e+07	7.56666e+07	4.51517e+07	4.17092e+07	7.9161e+07	5.547e+07	6.67063e+07	5.91858e+07	6.3031e+07	6.70293e+07	5.90512e+07	5.7103e+07	5.05773e+07	5.05252e+07	7.08721e+07	4.09783e+07
1.73_525.5609m/z	15585.9	28862.7	35428.9	56045.6	20490	20349.1	17698.4	23109.9	12771.8	29640.7	13929.1	23186.1	16398.9	10761	18292.1	15237.1	6992.47	11734.6	17040.6	19121	13048.4	13382.9	6267.82	8847.6	13672.3	20006.1	15414	26799.8	17605.5	38967.3	30778.6	25168.1	19395.9	18630.3	28277.7	12438.6	17944.3	21149.6	10800.9	14121.5	18597.5	28166.6	13995.4	18238.4	20463.6	12180.6	10946.1	18114.8	4364.81
1.73_614.3408m/z	43271.8	56927.8	82082.4	124913	62572.3	65383.9	55188.9	62954.5	51736.1	85587.1	76511.4	62431.5	70325.8	30123.8	49569.3	61501.1	45067.4	69038	58700.1	71990.2	66783.8	39717.9	47755.2	50359.8	52872	52664.5	51497.8	63717.2	49522.7	85326.2	37681.3	61314.9	35176.4	59626.4	81008.2	48417.2	37465.1	85837.8	49393.9	68334.9	58543.4	70835.1	71304.6	59106.6	58263.1	47337.5	46301.9	74125.2	30589.5
1.73_628.4997m/z	50866.8	36430	33126.4	90294.4	36015.2	25899.6	76904.6	43101.7	38318.8	63588.2	55770.1	135146	30873.1	53092.9	54349.4	44044.3	84296.7	47727.7	51190.4	71063	56342.2	52111.1	46401.7	46063.7	45948.3	67049.3	30783	47648.4	64561.9	56440.8	35541.4	40027	88835.9	26640.2	38125.2	57923.2	27279.9	36631.2	27256.2	40528.7	54959.9	42689.2	37157	156755	44437	72829.2	36592.4	36890	30198
1.73_717.3928n	169846	319150	424049	999882	312511	325276	271512	295310	239333	472076	386317	306157	305402	119404	195798	279730	190809	321503	232430	387110	333074	235483	241549	208355	255395	218921	220495	314158	216554	472203	193332	284975	170349	318463	415916	205375	170883	445752	258486	343470	303070	332614	344403	283439	270608	235111	234352	394946	160028
1.75_298.3472m/z	4.51558e+06	4.99343e+06	3.22917e+06	3.41174e+06	3.91383e+06	5.46709e+06	4.90457e+06	4.79027e+06	6.0369e+06	4.80336e+06	8.11503e+06	1.02802e+07	5.0513e+06	11780681	1.40726e+07	1.03398e+07	9.54357e+06	5.9323e+06	1.08789e+07	1.32645e+07	6.29057e+06	1.06814e+07	1.09644e+07	9.28062e+06	1.10838e+07	6.52586e+06	1.23058e+07	1.14351e+07	9.93764e+06	6.54377e+06	4.29531e+06	5.11759e+06	4.7741e+06	5.27745e+06	6.38499e+06	5.19744e+06	6.0533e+06	9.57578e+06	6.30694e+06	8.52293e+06	9.73142e+06	8.88425e+06	5.14613e+06	1.01734e+07	8.73305e+06	1.10141e+07	6.67851e+06	4.55947e+06	5.65099e+06
1.77_584.4732m/z	68613.6	52991	49589.8	123107	57690	57924.2	89758.4	69439.1	68223.9	86231	81670.7	152688	54465.1	70910.5	84223.4	63508.8	127490	78065.8	73197.6	83596.5	71841.9	62126.5	78739.9	54376.2	54990.4	92868.6	68193.1	76172.5	94963.3	94859	59554.1	53261	103776	41659.2	60975.6	73922.1	51723.4	59612.8	59031.6	66522.5	72611.2	75303.2	60080	210939	78085.4	88773.9	63842.2	64867.9	43430.4
1.78_550.3866m/z	332817	396571	508175	729558	559588	607760	483961	423346	479570	614550	483700	407574	740596	316702	347997	498861	329391	618835	436095	496854	546923	520278	416065	333863	313068	324018	402063	443726	413558	604042	367884	479608	320840	418169	379607	460086	332831	477831	345263	488422	652017	409441	479492	349107	576135	522962	323258	550572	405246
1.80_511.5204m/z	1227	2216.51	1322.71	6520.64	2699.58	4014.7	1686	8313.06	16692.3	15989.7	2928.87	743.215	99887.1	18586.7	49584.6	14108.8	27757.2	20468.4	41932	83099.1	134362	63689.5	182586	67000.6	104182	74109.1	76627.8	74037.5	123620	135268	13754.5	12539.6	13108.7	3451.51	732.086	4130.2	21271.4	6054.1	15191.5	2313.48	28205.7	4941.35	39375	14638.9	31684	10036.8	26436.2	23694.4	112513
1.81_466.2734n	193132	176478	156461	181819	175330	203754	186085	171780	207819	167686	298283	442423	175428	576318	595925	428391	436724	262181	563269	525003	244596	479241	473556	302061	445329	240712	495705	498874	380388	217078	167860	183633	183633	172125	190143	175634	190891	323248	202706	361339	366186	388373	224826	533410	474217	486956	208241	184305	205346
1.81_540.4464m/z	110343	91017.7	86843.6	208117	109171	94804	123483	92153.7	99335.8	118677	119612	173604	81679.2	88254.4	105019	91892.2	147604	111067	104852	127959	104333	93447	107459	92471.2	89645.4	121175	77224.1	93103.5	118027	116832	94488	92627.5	149409	75098	100165	116276	80847.7	74845.9	85457.7	101701	105885	93823.8	89034.6	250898	116687	123239	84030.9	96343.3	78140.3
1.82_482.3247m/z	174001	208884	279870	495922	307085	255950	226097	247306	187923	323998	252628	271922	171478	110827	146196	208029	149012	232230	209878	261723	232129	226486	142948	147904	192978	163434	159778	217365	224085	277909	165530	247601	157999	223060	247112	131658	130646	329502	202845	199470	194907	260801	246684	170493	245385	164171	158818	151860	159666
1.88_270.2791m/z	524200	558335	405874	505345	529929	664718	605061	621753	748536	668295	1.07724e+06	1.68538e+06	637984	1.98573e+06	2.22094e+06	1.69894e+06	1.65087e+06	1.0175e+06	2.14118e+06	1.85938e+06	872472	1.6255e+06	1.61835e+06	1.25164e+06	1.71852e+06	1.10086e+06	1.9707e+06	1.8127e+06	793539	905832	510291	550672	614532	646333	718367	575207	676515	1.22476e+06	700787	1.42382e+06	1.29012e+06	1.49194e+06	870839	1.85891e+06	1.71707e+06	1.4562e+06	998900	650548	686674
1.90_212.2004m/z	5175.98	3697.19	4594.08	4479.14	4769.23	7430.28	3284.83	6777.07	4706.71	10664.5	5695.86	5900.31	29408.4	12266.3	15945.9	10291.6	14099	10746.5	13522.3	17924.6	22830.5	13555.6	32074.6	27798.8	25711.8	25400.9	17394.4	22054	22020.1	22460.8	8231.21	2696.42	4226.2	5188.07	3318.28	6428.74	10007.1	6781.13	7909.4	5617.22	13985.8	5348.27	14376.7	7972.07	14193	6265.53	6958.2	6244.67	23634.3
1.90_240.2318m/z	6522.71	5594.55	5591	6315.2	4885.59	7452.29	2784.72	11037.5	4613.23	13603.4	8566.91	5750.04	31730.3	16241.9	21262.6	12147.2	19845.4	12006.3	16216.2	22662.6	29048.3	19086.8	34970.7	25691.4	28328.9	36506.4	18801	25309.7	26739.1	24960	8234.64	3589.31	3804.68	5804.06	2221.27	8302.23	14970.3	7340.16	11281.3	7427.51	17934.8	8788.62	21211.9	8630.92	18973.4	6791.15	11007.5	8851.15	31197.4
1.90_264.2453n	3.40663e+06	2.76553e+06	2.74387e+06	4.1049e+06	3.24663e+06	5.17594e+06	2.20376e+06	6.03613e+06	3.02343e+06	8.00478e+06	4.11139e+06	3.50144e+06	1.81277e+07	8.60553e+06	1.06228e+07	6.20663e+06	9.43233e+06	6.50321e+06	9.70998e+06	1.18711e+07	13490502	9.82667e+06	2.16801e+07	1.16447e+07	1.54118e+07	1.57013e+07	1.21297e+07	1.28931e+07	1.41791e+07	1.24688e+07	3.85967e+06	2.37533e+06	2.72993e+06	3.74655e+06	2.21578e+06	4.97312e+06	8.55001e+06	4.2854e+06	6.57861e+06	3.38126e+06	9.82512e+06	4.73411e+06	8.89255e+06	5.47485e+06	9.11591e+06	4.30926e+06	6.66124e+06	4.90926e+06	1.44807e+07
1.90_304.2613m/z	79537.7	71681.8	72100.5	79097.9	74228.6	99094	64170.4	103879	82890.9	124696	76964.2	85360.2	276531	136487	162641	115739	145694	116354	169555	191320	278511	189314	444197	225459	263608	236871	240336	211521	283229	249449	78141.2	70797.9	74583.4	87994.3	66285.8	98059.7	143235	85466.3	124676	77202.6	156075	89190.7	188661	119775	157290	112087	126776	107884	234563
1.90_366.2316m/z	55717.6	46635.5	44876.5	71592.3	44293.6	81716.9	42655.2	93360.8	51631.2	108504	56414.4	51881.2	208514	107658	133250	89523.6	114798	80286	126722	154271	189662	148626	257464	192891	212680	190118	173592	176558	201638	203744	48831.4	36068.9	38629.3	64942.9	37286.2	67659	112661	61304.7	100474	44187.6	133196	66532.6	142239	80467.1	122145	73906.1	96429.3	81606.1	190740
1.90_563.5523m/z	999395	704981	723977	1.51082e+06	735665	1.77801e+06	548802	2.20115e+06	717297	3.12434e+06	1.05102e+06	819721	8.7893e+06	3.39941e+06	5.04065e+06	2.44288e+06	4.14744e+06	2.20244e+06	4.1301e+06	5.91116e+06	8.08471e+06	4.93557e+06	1.21109e+07	8.20952e+06	9.17784e+06	9.26932e+06	6.2982e+06	7.61627e+06	8.4261e+06	8.60772e+06	1.08778e+06	514192	511369	1.10556e+06	436564	1.59608e+06	3.42007e+06	1.24246e+06	2.62131e+06	776352	4.75525e+06	1.48846e+06	4.55186e+06	2.05442e+06	4.11319e+06	1.45715e+06	2.63935e+06	1.89825e+06	8.24147e+06
1.90_647.5012m/z	12960.1	7530.26	9290.94	15002.3	7312.03	18851	8029.17	27559.1	12230	33276.1	12805.3	8384.53	83148.7	30641.1	41044.4	25105.4	34954.7	20317.3	33600.8	49816.6	67756.2	53328.1	104943	64222.3	79619	77237.7	52012.5	71150.5	74015.6	82132.2	11176.1	9028.83	8485.33	15349	8375.1	18810.4	29145.8	13598.6	24474.8	12955.9	44412.9	11790.8	44901.4	20171.5	34101.9	14664.4	20254.7	17935.9	67778.1
1.93_628.8577m/z	40089.9	21163.3	38549.5	47270.6	33120.1	43554.2	31448.1	22568.1	11098	7150.46	6912.86	11395.8	10895.1	12409.7	5635.49	8901.85	11813	5518	11248.8	16422.1	18038.3	7543.49	19056.7	21236.9	15359.9	18820.3	21894.4	8446.72	12846.9	15815.7	40083.7	56030.6	34963.8	39462	23747.3	16855.6	16684.4	9382.37	6625.57	14989.2	12777.2	13096.6	8809.47	7414.7	19624.1	19306.2	24963.1	13334.9	14335
1.94_469.3369n	267228	266633	351293	342525	289917	295648	278617	405435	280186	308713	293118	313982	224542	242910	240629	307193	241868	449680	352483	267915	291194	281224	226834	302396	249668	226533	242046	277134	240041	333081	257747	317237	206844	244257	268741	280457	212167	324859	256339	273879	288009	274657	316721	273868	341724	328848	267983	317933	195991
1.97_133.1003m/z	2811.12	2662.06	1927.97	2283.12	2986.59	2457.57	3899.5	743.557	2344.32	2350.77	4460.39	2270.89	1787.59	1787.98	2435.27	2522.86	2488.64	1693.06	1894.78	1251.21	1668.05	2726.94	2510.42	1606.9	1189.59	3236.72	1261.52	1398.18	1179.25	2159.56	2447.26	1186.25	3867.12	1664.37	3857.36	2859.47	3337.22	3414.84	1837.14	2753.47	2572.85	1703.53	1636.74	1697.6	2878.44	1929.91	1411.64	1859.2	1949.4
1.98_459.4146m/z	7641.73	8374.97	3898.87	4181.87	3753.9	2660.58	10200.3	2530.71	10170	4596.5	8450.4	782.336	6342.43	6326.96	9077.74	2953.04	76.0249	2584.57	3486.33	1901.51	3490.41	3823.65	2197.07	1749	1823.67	1904.86	968.942	3145.7	1895.96	6291.72	4360.61	3810.28	9393.71	3231.9	11233.5	3476.71	9839.85	8564.97	3705.97	3989.45	3330.65	2242.23	5051.53	3148.39	1531.31	1472.32	1085.43	1386.68	4815.67
1.98_770.6385n	44665	62763.7	21672.7	21204.6	14024.6	8248.67	90422.5	3583.33	96295.2	17344.8	61357.1	1730.09	28946.9	28133.9	42330.8	13112.2	1707.51	6074.08	12714.4	4563.33	10556.8	11149	4685.32	1345.62	2054.21	2416.14	796.346	11623.3	4775.72	24161.2	19625.5	14497.4	59568	12334.4	94617.5	15221.5	86854.5	51791.6	9549.17	13162.2	9779.61	6170.64	12978.5	8717.58	2426.36	3975.27	3440.62	3371.73	12350.3
1.99_1150.6290m/z	40601	78569	75623.5	104105	67978.8	95737.9	68090.9	95177	61636.8	36522.2	50728.5	29956.1	31957.9	77167.4	50942.4	65931.6	64050.7	26752.4	44136.4	29203.6	82220.4	58976.9	75048	61333.1	69962.6	35017.3	77530.2	50452.8	93971.2	62321.2	81814.1	86819.3	128114	121687	84695.2	80168.9	36801.5	63560.5	26230.6	50505.9	52129.6	71876.2	57355.8	51269.5	63116.5	26744.4	50046.3	61490.9	58667.1
1.99_584.3311m/z	89042.4	75885.2	75844.7	106807	85166	97589.8	80432	88210.5	87513.1	76105.2	72180.8	68359.8	68706.9	82295	85029.7	80064.7	92294.3	70051.2	80925.2	79843.4	89862.7	78655.4	78702.6	88409.9	69996.8	73022.1	109705	63997.9	82468.8	78689.6	109919	100887	89820.7	96166.9	67108.2	91445	88914.2	75435.5	66211.6	68767.9	84349.2	90740.5	78732.3	85384	95520.6	70856.5	92496.8	70235.3	115839
10.02_830.7218m/z	338119	495919	469110	711652	376186	300416	494785	454200	317084	1.13766e+06	500447	337419	304459	370837	250683	370821	325210	305834	306514	680082	291491	302564	302047	297715	770825	394998	481058	484221	446466	402425	489048	431280	335702	609608	1.0461e+06	382727	297407	624299	576934	437856	240707	712848	349517	351162	330449	385822	396301	347450	348350
10.04_775.7382n	31462.8	31461.1	44383.7	46719.8	46164.5	36925.6	35598.3	39831.7	36191	49441.3	36082.9	35514.2	41437.1	49884.5	37523.9	44275	58953.2	44366.5	54167.7	34753.2	48090.9	33035.5	40327.3	44723.7	41241.5	49180	35143.5	42986.4	40453.8	56374.8	50170.1	44193	41941.9	34037.4	40631.9	40255.2	47621.5	46389.2	39718.5	34969.7	43701.3	42053.2	34497.3	37156.1	39288.5	39266.9	45243.4	46276.8	33729
10.07_550.5927m/z	329417	368780	260617	283853	297231	445897	393701	358992	499421	405944	492441	616831	449838	707803	814505	677016	647904	391454	685416	757878	512238	761699	741767	660335	685378	504243	830571	771062	744798	580716	292658	341716	387348	414229	488800	442963	477496	562156	461995	587552	634029	559261	422950	775943	618077	652568	477987	403577	493056
10.07_804.7074m/z	256948	372170	351878	454250	283283	239466	324087	548730	261104	658579	398621	403200	222121	298314	240909	308747	270733	240147	280741	744513	249798	225572	264234	227673	588404	476390	299442	389197	329267	261800	299900	256517	302600	371796	697171	292285	232619	496273	361245	305608	229112	428427	276343	281676	270382	303527	305776	348265	270499
10.09_235.0668m/z	46968.5	43044	42622.5	38330	47128	46003.7	48599.2	42762.7	48718.7	43058.1	38393.2	49013.7	43609.3	44380.9	46236.6	40862.8	46069.3	42317.8	44671.4	41224.4	45183.8	47860.3	41425.6	41679.9	37820.8	42705.8	39320.5	38511.7	43912.3	35967.7	47501.6	43371.1	49455	38625.6	41915.9	46295.1	48439.6	43112.8	39717.3	42227.3	46268	38741.3	39145.8	43635.7	43192.8	46023.1	45539.5	43197.8	46255.8
10.09_738.7290m/z	60438.3	29953.6	31246.4	56889.1	47560.3	41228.5	38877.6	43060.8	36979.5	35462.6	36408.3	47183.5	41937	40285.2	44390	53816	39126.1	47415.7	52028.1	35462.1	52089.2	44912.4	64811.6	47829.8	36351.7	42553.8	31108	25877.4	43988.2	44448.7	44612.8	45057.8	48390.7	44737.9	47604.5	39953.8	41233.2	33265	29248.8	38078.9	64964.7	32993.8	34891.3	52802.6	42652.1	43584	41335.7	50211.5	42134.8
10.10_838.7029n	1.34336e+06	2043814	2.3088e+06	2.41514e+06	1.50338e+06	1.19113e+06	2.35986e+06	1.82671e+06	1.25038e+06	4.25481e+06	1.69362e+06	1.49059e+06	1.23791e+06	1.26366e+06	840280	1.32104e+06	1.19827e+06	1.3715e+06	1.06185e+06	2.80047e+06	1.04984e+06	1.18485e+06	1.01959e+06	1.19121e+06	3.02906e+06	1.72314e+06	2.93043e+06	1.94933e+06	1.7548e+06	1.51737e+06	1.91614e+06	1.84413e+06	1.25597e+06	2.66052e+06	3.42153e+06	1.2615e+06	1.06879e+06	2.47623e+06	2.7611e+06	1.67528e+06	930767	2.8076e+06	1.34718e+06	1.30177e+06	1.44544e+06	1.22595e+06	1.4079e+06	1.03275e+06	1.48892e+06
10.12_1624.3598m/z	10727.8	191899	227058	214611	97388.4	1847.53	131512	502437	27749.4	152295	188580	445906	10223.1	9528.67	3086.65	27008.9	6985.49	11568.3	9330.44	994598	5825.51	15843.6	4133.32	3423.84	661153	556123	106550	66220.6	89254.5	21755.8	3421.46	3342.95	23984.9	342529	301831	6485.06	4427.06	347631	231737	16554.6	2441.08	214550	5381.24	6289.96	75139	5316.93	59458.4	652.614	9942.92
10.12_800.6907n	2.46007e+06	4.64391e+06	5.11775e+06	5.17046e+06	4.16308e+06	1.70631e+06	3.94382e+06	7.95888e+06	2.72807e+06	4.42335e+06	4.77212e+06	7.52613e+06	1.80066e+06	2.43667e+06	1.32453e+06	3.06316e+06	1.93233e+06	1.75543e+06	2.55061e+06	1.00091e+07	1.57074e+06	2.0231e+06	1.47128e+06	1.60893e+06	6.69804e+06	7.11864e+06	3.4811e+06	3.99132e+06	3.32849e+06	2.60998e+06	2.46361e+06	1.99498e+06	2.97601e+06	5.766e+06	5.70387e+06	1.8046e+06	1.54603e+06	6.48462e+06	4.6577e+06	2.28954e+06	1.39779e+06	4.68276e+06	2.05227e+06	2.21352e+06	3.42453e+06	1.52341e+06	3.17571e+06	1.57681e+06	1.60482e+06
10.12_860.7705m/z	1.50708e+06	3.76728e+06	3.96973e+06	4.4153e+06	2.65157e+06	793570	3.1678e+06	5.67242e+06	1.53347e+06	3.46527e+06	3.17537e+06	5.01338e+06	993896	1.35507e+06	561967	1.76177e+06	966785	992168	1.45652e+06	9.08633e+06	799414	1.19881e+06	700024	800303	6.3565e+06	5.43729e+06	3.13015e+06	2.90286e+06	2.3785e+06	1.73082e+06	1.4393e+06	1.38514e+06	1.63522e+06	5.09452e+06	4.74865e+06	862240	716996	4.9161e+06	3.79149e+06	1.36332e+06	560598	3.79671e+06	1.18284e+06	1.14012e+06	2.33594e+06	713239	2.02735e+06	740012	817578
10.12_994.7209n	363916	661796	677773	724355	533922	238740	549994	985975	386117	575195	637909	967763	282899	346990	186732	401077	272675	260263	339907	1.4945e+06	252885	288187	206267	225538	1.02916e+06	952191	483612	537126	457476	358877	331872	351194	401448	797890	755474	262228	239037	832667	673284	319179	212863	647005	289048	311174	471522	217577	434708	249143	221238
10.13_818.8093m/z	43865.5	65221.6	67175	83665.5	30935.5	27364.2	54263.6	141800	30163.8	61726.2	56307.3	85629.1	27096.8	24079	14755.9	41305.2	25221.8	23173.8	34299.1	129906	14724.1	27408.3	20098.8	33797.8	93534.8	135932	45822.4	50335.6	50026.7	29336.5	35981.2	39938.8	38648.9	166019	134349	24884.7	27864.1	88869.6	56542.3	33907.2	22538	61662.2	24792.7	30252.8	44544.4	22784.6	33791.7	23334.7	27703.3
10.14_1650.3733m/z	56838.5	387674	381819	461650	189928	14113	331103	389515	46006.8	464971	243996	321431	28383.3	59632.5	12727.7	75513.2	16599.7	30153.5	65800.9	859005	27238.8	33223.2	16973.3	17543.9	747243	319154	237095	157850	245554	63638.1	24246.9	40594.2	45623.7	869916	580192	9890.87	10238.8	444808	501591	92953.9	10691.8	432681	55414.9	16989.3	152710	20925.2	120666	7670.21	17938.2
10.15_1653.3994n	331963	972836	922329	1.04282e+06	573005	162662	1.00804e+06	566883	276930	1.26909e+06	462224	538094	260635	373216	32877.8	305861	173399	283942	184906	1.20324e+06	68133.2	382548	48381.6	139161	1.84764e+06	469551	1.43899e+06	505674	714998	329648	239735	392146	226913	2.23777e+06	1.19521e+06	102155	133214	941135	1.59997e+06	467606	43219.3	1.17303e+06	295066	82598.3	483361	84857.5	505883	61635.2	168451
10.16_826.7062n	6.75274e+06	9.71481e+06	8851449	1.16656e+07	8.67189e+06	4.50391e+06	1.05577e+07	8.63258e+06	5.75809e+06	1.21278e+07	7.96704e+06	8.19381e+06	5.44175e+06	6.4661e+06	3.80266e+06	6.88283e+06	5.01666e+06	5.46389e+06	5.8226e+06	1.20539e+07	4.13476e+06	6.40003e+06	3.9534e+06	4.58766e+06	1.25459e+07	8.34201e+06	1.04774e+07	7.59509e+06	8.61368e+06	6.69495e+06	6.10301e+06	6.56775e+06	5.68067e+06	1.45338e+07	1.30963e+07	4.95049e+06	4.54632e+06	1.16907e+07	1.33121e+07	7.07546e+06	3.86215e+06	1.1957e+07	5.94394e+06	5.5423e+06	7.30492e+06	4.57509e+06	7.91186e+06	3.81814e+06	5.23703e+06
10.17_736.6575m/z	122055	106590	95930.5	83537.5	105678	117417	104060	107180	112827	96545.6	101086	106956	97701.2	112106	113316	101353	106801	94041.6	120881	87549.2	106024	100139	104907	98503.5	77722.4	114524	91537.3	106098	106579	100582	130303	94919.6	122499	79263.1	84055.1	105697	118237	90116.7	83903.5	100331	123099	83991.4	103929	118985	97610.2	114591	106455	108720	102381
10.19_1049.8997m/z	270472	245230	262303	305731	236945	371396	251786	249379	263473	255550	267197	207440	210570	289964	278210	275472	246631	276886	272482	248718	309598	334844	264749	323697	264312	277188	250448	324093	304955	381776	257889	324804	256999	244589	221485	286609	258261	209687	218500	289802	259658	222189	247612	290225	238475	241192	241301	249987	287861
10.19_520.4994m/z	51249.2	44191.6	47192.6	51456.1	43665.5	43030.2	37258.6	39908.8	50466.7	52856.5	45933.7	44564	42665.4	46549.8	45017	45329	53141.1	47217.4	42550.3	49406.8	52358.1	46419	48874.1	36472.1	48980.7	50205	47516.7	52972.2	55102.8	58418.3	41043.5	44332.2	43311.9	43584.8	40955	46235.7	46273.5	42210.7	43989.8	43097.4	51908.6	43496.5	45540.9	42535.8	43310.2	46526.5	49676.4	45258.5	58709.9
10.21_804.7800m/z	92117.4	48458.6	105223	90489.3	68193.3	67212.4	88701.7	60586.7	95397.6	185997	99447.7	73048	120902	78312.5	102920	118865	159190	112194	91125.4	108775	153991	100626	142881	84916.2	92200.6	48734	88600.9	82729.7	130167	166005	77425.7	131348	52800	123496	46669.3	177799	103781	58316.1	41186.8	85729.4	109397	115449	95856.7	53424.3	101901	117867	105983	125820	169796
10.22_1002.7411m/z	51964.5	44860.3	28280.6	45558.6	41976.9	44051.7	27521.4	50833.6	40554	33072.3	49303	47063.6	42688.3	57458.1	60367.3	51517.2	42260.5	46777.3	53824.6	34622.6	45758.3	47321.6	61821.5	48573.2	35750.6	46646.4	29185.8	53285.1	53190.7	54247	56159.6	34884.1	51900.6	15351.9	18874.2	36452.1	46705.5	38372.7	32887.6	27525.4	54140.2	38916.7	41156.5	48209.4	53252.8	60830.5	36494.6	52261.1	44882.4
10.22_1023.8821m/z	109802	89273.1	98716.2	119981	88524.1	113347	89066.7	95855.1	102979	101803	110450	108757	99532.6	123992	109677	116077	108715	117330	105258	108722	130364	128444	109464	126975	105573	118108	105278	126990	121464	166152	119738	149249	113481	103619	92231.6	120538	100009	99503.9	109331	124876	104320	91387.5	105201	98145.5	104828	106942	112201	109928	119486
10.22_1075.9155m/z	234448	210308	258041	246590	202296	370938	224079	219448	269175	216430	225230	234286	240477	262408	249924	209215	211602	246210	218587	185564	263376	282468	204756	267829	191333	207649	209931	224222	246783	290624	241603	304956	257215	221138	177943	252016	266988	152698	181488	230096	265996	173631	195156	273646	231464	247555	209124	229754	235657
10.24_708.7201m/z	96541.8	90281.5	74259	91831.7	78622.5	83027.6	57551.2	86618.7	73928.9	59738.2	80684.2	80548.5	86092.4	78960.8	75457.1	79743.8	85920.3	80067.2	84728.6	69216.4	80785.5	74767.3	88789.7	83055.6	64994.3	90405	74528.6	86755.1	73495.7	80706.8	86835.3	63816.7	98080.4	69850.4	58747.2	92441.6	89058	55827.9	60499.4	88835.6	114403	67729.4	68299	90101.2	79717.7	85147.6	82304.6	89448.7	72962.1
10.24_754.6911m/z	1.04023e+06	931277	846567	830509	932336	945896	903310	1.24543e+06	966714	870056	920728	1.02001e+06	902798	920139	896011	940843	975866	914285	1.01582e+06	1.09355e+06	903020	895145	900971	970484	954251	1.20938e+06	879931	952208	937339	902070	988270	879986	1.07581e+06	772850	1.05891e+06	907113	948263	928134	890276	951385	999077	844262	873662	926380	928727	969232	918407	965671	940627
10.26_509.4575m/z	120580	126655	128617	119093	127151	118005	107954	150955	117075	136808	121066	119882	106762	116712	108696	130258	120775	120455	109186	149096	105734	105507	118230	122863	144758	138134	121914	130761	104835	104005	134182	113499	116650	109100	135751	117291	116125	129487	129702	127026	125459	120958	112160	114660	122670	136533	118458	117553	124649
10.26_871.0451m/z	150983	128709	94706.6	156965	202628	105206	203698	351779	178626	267409	309507	223551	160497	329751	127183	185424	122566	92149.9	151707	217789	72628.3	111179	65892	93018.2	115620	126756	105388	65195.1	70180.3	94938.6	124652	91546.9	140612	218961	215198	171940	203247	258614	318911	125446	149344	203728	112447	128919	145677	172575	134177	63491	108863
10.26_871.2903m/z	73256.4	43778.8	40287.9	60622.1	333348	413979	202402	592138	424217	103043	478152	215577	117909	447229	254747	299444	267202	87113.7	306772	88391.5	36950.1	33119.1	10275.9	51082.7	19496.4	42912	16419.6	36512.1	30194.4	54285	104021	43825.2	225707	144895	80947.8	457992	494564	129169	63226.9	46613.1	125204	50493.5	126415	262707	134550	312649	144295	11723.8	74190
10.27_780.7083m/z	727123	774606	716463	756658	723695	647787	674884	1.32524e+06	682148	863426	879696	999041	641693	668740	604102	694965	686579	641341	729742	1.29886e+06	619209	613967	662185	678767	1.09349e+06	1.29135e+06	613055	828077	731047	665869	791613	622085	781680	624911	1.18163e+06	673807	663113	976000	702868	738506	691309	738294	619745	699065	676854	720129	671492	697155	645295
10.27_805.7171n	1.70563e+06	2.79072e+06	2.36074e+06	5.92204e+06	3.67434e+06	1.22602e+06	2.53342e+06	4.53503e+06	1.54376e+06	3.60849e+06	3.94218e+06	4.46853e+06	1.40506e+06	1.86449e+06	1.2199e+06	2.24432e+06	1.48701e+06	1.45234e+06	1.73325e+06	7.03034e+06	1.4577e+06	1.49224e+06	1.58316e+06	1.50584e+06	5.97371e+06	4.17932e+06	2.3678e+06	2.97003e+06	2.34699e+06	2.04808e+06	1.93487e+06	1.60547e+06	1.82716e+06	3.22037e+06	7.75353e+06	1.59845e+06	1.28299e+06	6.73566e+06	2.89351e+06	2.05963e+06	1.2714e+06	4.41296e+06	1.60395e+06	2.27592e+06	2.06294e+06	1.62092e+06	2.14e+06	1.6289e+06	1.4451e+06
10.27_832.7398m/z	957045	1.69366e+06	1.57074e+06	2.51547e+06	1.39344e+06	679129	1.50868e+06	1.55977e+06	728753	4.92021e+06	1.83535e+06	1.20904e+06	736343	1.2435e+06	530192	1.07011e+06	900648	772898	960326	2.57494e+06	711297	873892	866511	729101	3.45779e+06	1.45058e+06	1.47465e+06	1.45435e+06	1.82019e+06	1.18456e+06	1.34117e+06	1.1314e+06	929378	2.05648e+06	3.65559e+06	1.29281e+06	682519	2.35107e+06	1.99613e+06	1.59896e+06	679525	2.66875e+06	1.00792e+06	1.06691e+06	924168	1.1642e+06	1.50086e+06	813034	887544
10.28_785.6622m/z	263599	237854	238079	205860	241241	274017	207599	402040	262269	205160	290431	340405	242125	273274	256600	264156	245998	212552	249956	283563	218923	224895	252875	243335	255474	370758	203139	253505	231756	216067	284462	195686	314202	169305	252329	249699	280526	259900	197496	265952	288692	208865	222745	237436	225124	243442	216772	257983	211170
10.29_650.6350m/z	119424	85262.9	84488.5	65894.9	91780.6	103462	87907.8	98961.7	109154	79533.8	91984.3	112414	95654.3	110989	115645	104643	106549	81670.9	120475	90341.1	79088	95460.6	107009	108420	69269.1	91890	73894.2	98752	90256.8	83798.5	109655	81687.4	125454	70926	66333.9	84812.4	106698	85504.6	79039	95357.5	122004	78113.2	91266.1	111217	110934	106368	93367.6	93557.6	85475
10.31_1110.8830m/z	162142	138155	126868	176760	138036	157287	138510	129880	157009	122300	135326	146958	168058	137431	144518	152732	156419	175513	131600	124745	173817	177894	150794	174395	141268	140514	132294	189694	165946	125046	147608	192598	158413	172163	161237	150596	117882	111718	99421.5	154452	147695	117276	146366	174406	172389	153250	130521	163904	106594
10.32_128.1064m/z	22803.9	20522.9	20164.9	16164.9	19876.3	24432.3	20073.3	20255.1	23705.7	19160.2	20435.6	23712.2	26710.3	24869.9	25836	26354.5	27670.8	22942.1	23848.5	18220.1	20850.1	21255.8	21475.2	25048.7	16278.4	19078.9	17955.7	19299.1	19965.2	20344.6	22819	18745.2	29625.9	14912.7	15274.5	24338.1	23701.3	13946	17823.7	21891.2	28808.2	18096.6	24345.4	24129.1	25271	28374.3	24417.9	25595.4	23404.8
10.32_207.0987m/z	8490.63	9380.8	9062.29	9270.08	11425.8	11580.9	11378.8	10639.3	10703.5	8812.01	9133.09	11098.3	11461.1	10065.6	9488.01	12632.4	12050.8	8275.63	9827.23	8961.16	8372.18	9442.14	8061.49	9496.36	8062.58	9207.11	8724.54	9601.27	8077.06	8522.06	8098.58	8839.7	11307.3	9436.69	7975.12	10139	10711.6	6514.06	10532	11181.8	10768.5	10649.6	11033.4	10811.6	9808.41	10081.7	9483.58	10064.1	8782.99
10.34_393.0360m/z	132966	109047	97464.8	95529.8	122395	123012	104627	130667	139404	106576	121903	142931	117024	137650	137965	123912	111329	121735	132693	97422.6	124937	124406	134130	115778	88018.4	137994	98251.1	133726	110626	119200	135343	113632	140472	96605.1	82166	123644	132158	92410.8	105936	113175	125206	95692.3	120824	130500	142439	128163	114647	111656	124782
10.34_736.6521m/z	13787.8	14945.8	10545.7	6166.98	10891.2	16023.2	10659.4	14429.9	17772.9	17142.1	15599.9	11067.8	11787.7	12491.5	12263.1	11525.3	14161.4	11059	18945.5	14507	21253.5	20065.5	20531.2	22443.6	22473.9	16776	16031.7	10195.2	11481.8	10487.9	15011.2	10592.6	13642.9	11549.4	9368.58	13580.4	17707.1	5799.43	9871.28	11673.8	15395.5	8020.58	9911.18	9569.25	11147.3	15621.2	9372.49	12082.4	20646
10.38_1124.9073m/z	82252.1	61645.5	70451.2	88645.6	51661.5	99938.8	58714	59744.1	98526	75921.2	63676.3	55394.5	74425.4	55853.9	91311.9	65601.6	81679.4	60526.6	49221.7	48889	114475	128983	70373	90638.4	40080	50378.7	66992	81306.8	81479.3	71401.3	52206.9	143680	67542.5	102879	81459.2	59316.2	74727.8	60369.2	39735.9	69486	70411.6	35922.6	76831.1	77217.4	80926.7	83478.5	45206.4	54392.8	69456
10.38_473.1602m/z	83366.8	95498.1	76627.9	66935.9	97703.5	90650.6	91567.7	88551.8	88735.7	69220.5	80980	98087.1	96682.4	95360.8	92531.9	94677.6	96115.8	77761.1	98059.3	75211.7	85934.6	92425.8	94021.7	93154.7	81588.9	97222.2	78188.9	84337.2	78354.4	78672.7	102366	78556.2	102280	70376.3	74148.2	85987.5	94097	67265.7	74574.9	87069	89715.3	69778.1	92006.2	97985.5	90481	99641.5	81277.5	103184	84835.4
10.39_722.7365m/z	51563.3	33523.2	24878.5	36933.2	42753.9	45847.9	37334.5	37060	46525.4	34481.7	43797.6	45690.4	51725.4	42209.1	51135.2	48347.8	47917.3	36627.2	46330.1	28031.8	50098.3	31345.1	41870.7	44235.4	27825.6	29192.7	29476	42652.3	45111.5	38420.9	47038	32234.3	65586.3	20214.3	29254.6	46396.4	49421	23301.4	34281.4	38446.3	60395.5	34020	41052.7	48702.6	42031.5	53262.3	37039.1	45849.3	35746.9
10.40_766.7622m/z	16562.9	11758.8	16171.9	19351.2	18074	16623.4	14376.3	13590.1	18725	11293.1	16416.1	17570.5	18286.1	16080.9	25391.1	19900.6	18468.2	17164.8	17471.7	12518.8	20502.8	21161.8	18732.9	13872.1	13938.8	17712.7	20493.6	18500.1	20858.1	12544.9	28336.4	17236.6	27791.5	9537.05	15108.1	18487.3	20556.3	7857.08	14392.8	14817.6	30865.6	8789.37	17822	28630.7	20375.4	26667.8	15734.2	20751	13911.4
10.41_578.6233m/z	180753	201074	153715	158613	160360	261958	192346	220829	267008	184228	216859	331645	269739	413016	506408	461573	429135	298328	540509	512228	410812	623356	654800	528536	592096	442035	721377	829068	694629	568955	207452	218791	232106	203324	208572	221276	254158	267235	241238	299426	384200	350108	261058	508858	428537	531053	382848	328725	353545
10.44_529.4619m/z	48482.8	41051.8	51927.6	36436.7	45178.6	55237.6	39869.3	52052.5	59779.1	35165.3	49641.5	60267	59493.5	56765.3	61077.4	58945.9	49780.4	59885.2	62814.9	54738.9	57577.2	68628.3	60426	59831.5	45750.4	57804.7	54484.4	62327.9	56121.5	63470.7	48576.8	41986.7	52660.4	44334	48228.1	55039.8	48161.2	51117.2	52506	49860.2	58196.3	39676.7	58482.9	56374.3	64524.9	54464.1	59387.3	57930.6	50282.8
10.46_858.6212m/z	79233.1	88261.1	72823.5	101263	78210.4	72723.7	118103	92927.4	84630.9	79155.7	108871	106331	63278.6	89844.5	80181.4	58780.7	71345.7	64323.8	86169.7	86936.6	71841.5	71474.9	67951.6	68612.1	71591	83990.6	76482.5	70992.8	112699	59427	87939.9	112470	72242.7	113439	90398.7	78282.5	54134	93866.1	85061.8	74106.9	71770.9	74925.4	66960	63804.1	97671.5	73415.5	80756.7	73560	61538.2
10.48_1042.7946m/z	1.42898e+06	1.4695e+06	1.35089e+06	1.37557e+06	1.48578e+06	1.36448e+06	1.44912e+06	1.40403e+06	1.42714e+06	1.39315e+06	1.40486e+06	1.43844e+06	1.32929e+06	1.34203e+06	1.30674e+06	1.39874e+06	1.38549e+06	1.39418e+06	1.36006e+06	1.4934e+06	1.27503e+06	1.41517e+06	1.2802e+06	1.37122e+06	1.53388e+06	1.39494e+06	1.48959e+06	1.50784e+06	1.43038e+06	1.39987e+06	1.34663e+06	1.37518e+06	1.39517e+06	1.43734e+06	1.48106e+06	1.31197e+06	1.35138e+06	1.4195e+06	1.51258e+06	1.34132e+06	1.29617e+06	1.41593e+06	1.37521e+06	1.37281e+06	1.43759e+06	1.35425e+06	1.33797e+06	1.39964e+06	1.36687e+06
10.48_1077.9314m/z	305252	210984	304268	325845	264937	536502	229604	274601	331556	227675	240799	257324	266027	303129	344402	275480	236649	311174	284306	245504	384445	414788	353099	430910	237850	260356	239392	329479	296026	421385	252537	294577	324416	196658	221965	350301	309429	165726	199609	247940	309392	183147	267382	342262	295307	274484	260960	239501	283918
10.50_1051.9151m/z	397770	308712	344679	369258	324075	517375	330606	352758	424876	354186	388776	381285	372402	464488	461354	410674	402026	418886	423814	362064	465921	479699	469655	493400	339694	398036	315038	472931	419739	568519	355751	402565	429634	296652	328596	441203	392741	305000	375669	415574	411031	287040	396973	447267	421803	389623	374889	397315	443066
10.52_1138.9189m/z	108120	73075	82127.6	122662	64546.3	133423	68197.9	98137.7	136204	112405	89149.1	111477	151364	73134	101652	153742	102040	153141	67123.8	74275.3	156436	111295	74223.2	82329.8	47773	46880	51444.7	87111	53922.8	90175.1	76145.2	148443	104236	211296	148320	89550.5	82117.6	92679.7	69151.9	98478.2	121661	45888	113938	128531	170061	80973.2	60941.9	86528.4	69335
10.52_1165.0177m/z	86844.5	48153	53225.8	40498.1	70082.4	79447.8	60667	71811.7	52898.4	43283	48886.8	60429.1	55036.5	59814.3	57844.4	55935.9	54154.9	52619.5	51856.7	34090.2	54458.3	61585.8	51174.1	63770.4	46142	59134.4	34002.1	65959.2	39494	51763.4	84165.3	64411.9	82023	75893.6	42930.8	68839.5	62875.9	36872.7	30247.7	54010.3	57190.2	22708.3	62235.4	50346.5	47353.3	52464.7	34288.7	68051.1	38034.8
10.52_722.6461m/z	257108	215808	195106	207662	218107	240541	208523	233869	255243	200602	222401	248033	263386	243045	258054	251716	242168	207965	240010	193512	214325	220659	236815	241775	170011	225248	194362	218934	223283	205449	245489	197492	270293	174887	184366	228275	244107	185980	209824	243972	272988	194251	228638	240144	217680	239037	220024	236736	209432
10.53_1106.9163m/z	463098	394818	412502	383817	457417	487068	389209	478731	496352	365823	397360	432565	437226	392600	456624	367900	415068	447727	450442	412314	476659	489722	479055	454626	395919	451342	436325	479327	427804	457861	474543	458862	479529	373521	420503	367424	460470	344246	385498	424788	433710	355345	422985	440277	415560	424519	340711	485358	427851
10.54_232.1298n	74514.5	67174.6	62220.6	50916.1	63205.4	72283.6	62378.4	63116.2	71483.9	55239.8	54766.6	65114.3	66494.7	71431.2	69811.1	68387.5	62717.7	61581	67824.7	54206.6	51298.9	58159.7	61010.9	67793.7	52922.5	56779.1	59140.6	59519.9	58147.4	53152.8	69424.2	57301.2	69140.6	58988.2	55142.6	65040.7	64606.4	57318.6	58056.4	61449	67994.9	54743.1	66923.5	71025.6	66539.3	71985.6	64047.5	69513.8	66906.4
10.54_509.4575m/z	106942	108068	107296	95529.8	114611	106076	106978	123220	96082.3	111209	108382	112410	109272	98189	99072.2	99050	101395	90792.2	99583.4	127573	95258.2	93158.6	105712	104458	127946	125376	91397.1	109688	113588	105383	118365	102503	103442	98340.5	104245	102503	96621.6	115454	97378.9	109439	100281	100179	95455.8	97727.1	106332	102717	108646	110424	103116
10.54_535.4727m/z	74218	85225.2	76517.3	126852	94111	61739.7	85531.1	90283	64088	176319	109030	81027.4	60040.3	83046.3	58612.7	72358.9	63482.4	64915.3	79756.9	119383	63384.8	69894.6	69735.4	56788.7	145404	96733.8	70161.4	85049.8	101693	79603.2	85921.7	69919.7	68575.5	88285.7	172022	93786.3	64714.9	115896	88043.1	94957.7	66148.1	115058	63934.5	70970.1	79901.5	78965.1	95951.8	71867.7	69716.6
10.54_782.7234m/z	1.81959e+06	1.62716e+06	1.4311e+06	1.37351e+06	1.59169e+06	1.71013e+06	1.52179e+06	2.0762e+06	1.74239e+06	1.47351e+06	1.59499e+06	1.81946e+06	1.61635e+06	1.66853e+06	1.6642e+06	1.66787e+06	1.61784e+06	1.53881e+06	1.80886e+06	1.74961e+06	1.50304e+06	1.54669e+06	1.61837e+06	1.63706e+06	1.61041e+06	1.89525e+06	1.40206e+06	1.6989e+06	1.49277e+06	1.46671e+06	1.80693e+06	1.46738e+06	1.79798e+06	1.31206e+06	1.66876e+06	1.6491e+06	1.69782e+06	1.54547e+06	1.46017e+06	1.6617e+06	1.75487e+06	1.34054e+06	1.56994e+06	1.68036e+06	1.58174e+06	1.67521e+06	1.55995e+06	1.78363e+06	1.54569e+06
10.55_1033.7437m/z	30956.6	44419.2	40552.6	41923.6	47251.6	27877.1	34573.3	54482.8	30553	63469.6	47688.7	46064.1	24120.8	44760.6	39314.9	35498.3	44492.1	32341.1	35051.2	49406.4	33406.6	37880.2	37487.9	35529.9	46417.7	44683.2	35820	41926.3	48241.3	35956.4	43059.5	27345.1	45857.1	37913.3	55560.8	44419.4	33951.7	40103.7	42946.8	40181.7	37380.2	45137.8	29673.1	42586	39527.3	46562.3	47836.8	40595.9	31653.3
10.56_1720.4458m/z	42581.3	125715	248511	411949	323211	15288.4	78803	30392.5	5142.04	381562	92330.9	21445.6	9433.18	17256.8	8571.13	20931.1	18039.5	8623.5	19972.4	96870.2	16288.7	26062	21822.9	26639	295065	49576.6	82161.7	53558.7	222509	96413.7	38544.2	105963	22055	136948	448517	96209.3	11648.8	141539	75929.2	70344.7	10548.1	134335	19966.2	14973.5	65570.5	38619.2	67412.6	24068.9	39102.2
10.57_780.7788m/z	52123.6	37258.4	28195.2	32856.1	39445.5	39291.4	33288.3	44474.2	42726.4	27219	37941.8	39590.6	39319.9	28763.2	52529	48602.2	50366.4	42693.2	39256.8	32035.6	32150.7	34391.6	43904.1	32943.5	25647.3	37338.4	31517.8	36831.6	36426.2	31486.1	36011.8	24986.2	44482.9	36791.6	29483.9	31878.1	36043.1	28335.4	34022.7	40344	53538.5	36215	38870.3	54969.8	42029.1	35616.3	37379.1	43660.8	42819.7
10.57_985.7425m/z	135560	100676	111850	117812	128777	139928	111360	146565	137033	123883	123826	160399	147754	134384	143878	127850	127817	121638	132862	143291	119196	125018	112311	125114	123164	164490	102453	118409	118305	123197	143481	114882	162284	114290	109244	141207	144278	97676.8	115637	123724	139792	120816	105055	129483	155714	137592	125985	142726	125751
10.58_1018.8742m/z	139969	147434	119804	104025	95364.5	119714	131130	113014	127879	94312.3	113611	104470	147113	122175	114281	119975	132531	129629	114078	92371	118522	106086	125844	128215	125608	114498	120738	112636	108371	111064	150508	170256	116762	125326	86783.5	115123	115991	105457	124638	108663	107140	97173.2	114214	96999.2	95412.9	116034	115258	135470	128533
10.58_1034.8781m/z	92307.3	109610	97798.1	93095.8	93680.3	109826	104796	119073	131326	94971.1	106056	97994.9	111399	120958	102613	109522	94202.8	99812.6	116200	108573	125933	109654	119893	117111	124923	125001	113431	128134	118392	123284	111244	121726	124993	105577	93259.5	125205	113138	91675.3	97615.4	89912.1	106973	84928.7	97194.4	119942	105735	105788	115523	116334	121074
10.58_125.1071m/z	145459	132190	119203	97985	128828	140709	118464	138694	149861	103292	124865	140248	132008	139089	137650	124464	122372	120614	131511	111834	122850	121702	122974	125986	107900	124394	105337	121357	104763	102943	144113	114888	152723	110824	110866	135875	140095	111520	121668	124670	130676	99637.1	132304	133470	124128	133167	129952	137923	124091
10.58_172.0722n	190853	179447	166098	142691	181478	207003	169741	192124	191209	140570	168741	193041	177667	186142	190517	179209	165891	159530	165640	150921	154274	170201	160862	177127	137636	170321	146555	167898	142017	145551	190785	161131	219243	155201	145999	188536	193646	144737	150850	168799	182928	133575	174056	183386	172186	188345	167478	181606	160149
10.58_217.0178m/z	406231	358909	351097	259690	363293	455070	347503	404172	442148	277178	355185	405028	390381	412037	438269	390357	370425	351159	372410	306617	344695	369865	352624	381396	271533	357967	298403	342496	293025	312177	408952	321573	478314	300964	282958	389914	428003	305285	325584	371739	417843	272552	378671	404953	359344	412247	352093	404860	369175
10.58_291.2521m/z	69922.8	65685.6	64872.3	50702.8	68666.1	78187.5	59817.1	66809.8	81603.5	53605.3	60048.2	65534.7	74757.1	66643.6	72828.1	68955.1	67193.8	61168.5	60630.9	58398.3	56253.4	60849.5	55390.3	64271.7	54205.8	59997.5	60037.1	61798.2	52074.3	60017.9	73778	61040.5	77338.5	60045.4	61604.7	68015.9	71914.6	57997.8	59750.6	64509.5	65362	53302.1	64366.6	67678.3	66914.2	67566	61924	69135.4	61401.3
10.58_593.5812m/z	70701	76735.9	66708.9	56519.4	67982.8	72090.8	77401.7	75149.6	88971.7	86153.3	76152.4	74569.8	80711.3	77188.9	93096.8	84586.4	83565.3	69636.3	89686.7	73016.8	65633.8	75564.5	79974.1	67091.9	73950.4	85680.9	73520.6	80160.9	73254.4	70745.9	66179.4	78790.4	72324.1	82040.4	53503.8	73904.2	79500.9	71055.5	66843	81617.3	64399.5	70316.3	75040.2	83862.9	80501	80122.3	79396.8	78307.2	68553.6
10.58_659.6143m/z	88340.4	84574.7	71751.7	57132.7	73380.4	91017.9	82540	81975.4	95342.6	53374.4	72572.2	79709.3	91777.6	86629.6	80864.4	74123	68648.3	78577	82595.4	79818.5	71722.6	70415.7	79395.1	83777.3	62749.3	72528.4	60815.7	88591.1	67384.6	67026.7	81568.8	86298.1	88684.2	62947.1	63813.7	70895.2	83662	70417.9	72051.4	83280.2	89221.8	61082.5	80181.5	76430.5	71242.3	91329.6	70864.2	80669	81186.8
10.59_110.0594m/z	19436.7	19177.3	15940.1	13461.1	17422.9	18331	11777.6	16971.7	19571	11438.4	13390.6	13344.3	17063	14393.4	17383.7	15540	16446.2	13051.6	13439.5	13335.9	17148.3	15096.4	16294.6	15677.5	9189.18	15603.4	12555.6	14829.7	11700.5	13432	19328.1	15413.8	20452.1	11304.8	12043.9	17136	17144.5	10355	11733.1	11413	15241.5	8810.32	16205.8	17491	15576.4	18566.8	16218.2	19600.9	17352.8
10.59_252.0701n	223576	217633	181462	145193	223236	246603	197471	222061	248789	164780	201809	221596	219937	217688	218886	209557	191069	193041	205016	169648	186637	196263	188727	203311	161064	203566	161560	187097	168907	174439	229038	191917	263816	167771	169357	223798	239377	179732	180868	201159	222524	156265	201179	221511	199071	220882	184572	222781	193342
10.59_362.3322m/z	35510.6	32693.7	22577.2	21654.8	27237.7	29038.8	25547.9	27486.9	27735	19589.9	25594.2	28326.3	26696.8	28881.2	25725.1	20946.5	27408.5	23544.9	23733.1	23246.8	28025.6	29207.4	24386.3	25716.4	18742.8	19999.6	20835.5	25379.4	23353.6	23241	33330.6	22547	27940.2	22587.9	20609	22487.3	24863.3	22520.9	17919.8	23048.7	26568.7	22806.8	25894.4	26038.6	22764.7	24694.6	27584.8	28131.2	25753.7
10.59_364.1854m/z	39040.9	34802.9	29642.4	23846.3	31364.2	37975.5	32130.4	33792.6	38397.2	25238.7	35289.5	32403.6	30147.2	37522.1	39860.7	34269.5	31436.4	30198.8	37519.3	29470.1	31743.7	33203.8	35727.3	33360.4	29986.9	33235.1	29738	38671.3	33748.3	32844.7	38761.1	30742.6	37994.9	30349.6	24342.6	34581.1	37302.1	24773.4	26891	31783.5	38777.7	22348.3	32638.3	34715.5	36190.9	39614.1	35280.5	39236	35933.2
10.61_799.1051m/z	122629	89407.9	98676.2	40986.2	89511.4	147819	133259	135493	107062	82560.8	108453	110295	134385	140441	117195	117659	163473	126735	123421	113016	78266.5	147538	88660.3	115085	88415.1	77772.6	116071	97628.6	87042.3	69189.4	122284	86125.7	185228	73354.3	45057.6	121163	160885	37050.4	100138	127615	138704	68554.3	104761	121219	120597	141043	116705	144815	126240
10.62_1065.9283m/z	65674.8	49897.4	42780.3	45700.7	41712.6	56341	75563.1	63911.9	62129.1	62392.1	46307.8	40204.5	54091.7	46829.2	63310.7	57745.8	48919.7	51598.7	45605.8	51780.1	63026.7	60523.8	55095.5	57342.9	51154.4	62211	55637.5	71444.9	69887.1	85564.8	46654	54431.3	60711.8	59941.4	62826.1	76152.4	64798.1	49386.4	55740.3	38355.6	47099.2	41914.8	32906.3	63815.4	43418.1	45500.1	49816.9	58081.4	52283.6
10.62_245.1370m/z	34032.8	31234.1	28128.8	24463.9	31525.3	30479.5	25987.3	29499.6	31770.9	23316.4	27511.9	29819.4	31172.3	35218	32129	39150.2	31106.5	29368.8	28252.6	25350.8	28324.9	30936	33246.4	29560	28429.7	28165.9	23098.9	31114.4	29742.3	30827.5	29273.2	27643.2	33625.3	24508.1	22867.3	32404	34483.2	27020.1	27589.3	33307.3	31327.2	23837.3	32294.2	32318.5	33114.8	31613.7	29220.2	33615.5	28333.9
10.62_288.1935m/z	62195.6	55706.9	50321.1	45015	62508.7	58335.5	53751.1	55316.6	56980.2	45962.3	53594.4	58880.7	59908.8	58537.3	60091	57163	56230.3	51818.9	49546.5	42287.9	47406.3	50033.6	49509.2	50609.7	44439.4	53977	43878	50175.2	46324	45548.9	56820.9	46969.8	56976.9	46851.4	50036.6	56740.3	61464.4	56103.3	44883.5	57722.3	55130.2	41347.6	53390.4	54914.3	58900.8	58304.1	55840.9	51696.3	54176.8
10.64_1364.4261m/z	111514	56754.7	57420.6	37435.7	46137.5	64587.4	77391	68013.9	93659	72219.1	71800.3	50483.7	70459.2	69881.6	45053.3	128533	56655.3	70754.3	83419.6	25146.8	48183.9	50856.4	60534.9	99010.4	50005.7	55275.8	54827.7	63421.7	55185.3	48879	78632.3	70765.6	69535.5	39535.2	31971.7	68721.9	78502.2	75391.7	60781.3	63881.4	78055.8	61131	53852	64356.3	66230.8	81652.2	74830.5	83379.9	64969.6
10.64_217.1051m/z	56286.6	52493.9	51100.2	46226.7	55469.7	56758.8	52919.5	53260.7	58814.3	45339.8	42909.4	49069.1	49060	54668.6	51734.2	52579	47543.6	48753.6	48251	47211.1	44244.7	46955.3	50586.6	50052.6	41488.6	49878.9	46796.1	50906.1	49997.5	46872	58323.1	48461.4	60615.6	50091.4	47947.2	52460.1	54940.2	46967.3	42946.6	48028.8	48974.6	42806.3	51952.6	47406.9	52943.1	51900.4	43695.4	52254.5	53169.5
10.64_539.2095m/z	216390	216446	183769	169497	219057	221891	180835	204216	232777	159811	184662	228009	199530	223579	245796	228055	227066	202730	221723	183541	199264	212266	201426	224141	160911	235715	184157	207523	165566	198816	249956	199723	256598	167851	149280	186108	212058	172583	176636	192364	203529	160250	205958	244882	207783	211345	204513	228396	190225
10.65_141.1019m/z	12029.3	8781.59	9544.28	8009.5	9929.06	9324.77	9480.97	10667.8	13144.1	9385.94	11963	8880.68	12119.1	8796.25	11936.9	8463.78	10650.7	9960.44	10666.8	10240.2	11988.1	12771.2	10761	8852.15	6382.8	8297.39	7093.53	7337.17	7297.46	8428.94	11585.5	7268.74	12557.4	8701.43	8069.22	11231.9	9734.65	9112.17	9919.86	8865.51	9373.81	7504.15	11416.8	10985.5	9176.68	9751.19	9605.26	9749.82	11561.3
10.65_393.0361m/z	117857	104589	103522	82861.5	123911	107672	89325.9	109118	113393	75920.9	101821	123342	114368	127684	129348	112166	88658.7	130306	109137	90934.7	101519	111006	110117	121574	93490.8	126177	85003.6	100566	101180	100393	116499	99001	129565	85796.1	78473	112806	111212	88908.4	103907	105144	114265	74607.2	103011	130642	105507	139703	122750	126889	106644
10.66_1108.9164m/z	94224.9	76032.9	110220	130624	119540	163723	88414.7	136730	160826	91697.7	89258.5	87414.8	122672	115139	110348	53150.1	101200	86609.1	120307	72353.9	112656	123140	172104	122572	42902.2	54706.3	85724	177880	64158.9	77541.5	152041	146358	148169	88061.1	51679.5	101393	127279	46527	66772.5	96027.4	108756	55013.2	76157.1	99237	115434	91081.8	71642.1	130016	83067
10.66_228.1949m/z	39382.7	36834.2	38750.9	31021.8	35047.7	34898.7	30963.5	36967.1	38232.2	25591.4	36260.3	33481.3	37607.8	39648.5	39203.4	34933	33861.3	31614.6	31274.7	27192.5	31074.7	30770.8	32649.9	34015.5	28341.6	31423.9	30350.5	35022.8	31491.6	41299.5	37308	31437.1	36178.4	26871.5	28774.1	38358.3	36428.9	33893.3	31433.3	32071.5	36245.4	29102	37261.3	38653.5	36730.2	38422.2	33876.9	34963.3	31300.9
10.66_711.5487m/z	85836.5	68832.1	70585.8	41613.2	44169.1	88367.6	41370.1	86634.1	85618.4	32224.5	50600.1	49139.7	79043	82746.7	89337.3	57133.6	47239	78422.8	59417.7	40629.5	58687.2	74518.8	74612.1	93245.4	37379.5	48962.1	38550.1	74180.2	44392.9	60558.6	82894.9	63703.1	93325.9	41041	31670.7	61588.2	63189.4	56118.5	45409.9	62474.6	67178.6	40447.5	62750.3	72060.1	59586.2	85899.5	49825.2	71781.4	64965.2
10.68_796.7394m/z	6.40581e+06	6.10218e+06	5.65573e+06	5.19599e+06	5.84951e+06	6.22239e+06	5.75149e+06	6.89444e+06	6.52319e+06	5.5012e+06	5.83931e+06	6.94355e+06	5.88397e+06	6.21704e+06	5.97932e+06	6.25916e+06	5.78978e+06	5.76137e+06	6.14595e+06	6.64104e+06	5462088	5.87423e+06	5.88066e+06	6.14822e+06	6.00982e+06	7.85967e+06	5.74438e+06	6.58922e+06	5.6069e+06	5.74077e+06	6.48332e+06	5.675e+06	6.94225e+06	5.35815e+06	5.6203e+06	5.94072e+06	6.2194e+06	5.85643e+06	5.7546e+06	5.96821e+06	6.1353e+06	5.12697e+06	5.77472e+06	6.24084e+06	5.94627e+06	6.11048e+06	5.71047e+06	6.44619e+06	5.77663e+06
10.68_838.7847m/z	489267	476259	436179	430414	431663	501231	443373	576163	528216	491583	469179	581464	427949	466960	489253	501508	428441	440248	441663	640110	396469	451173	481850	487081	563760	758849	472424	561468	434975	430547	555491	415420	615509	397000	484115	434829	494479	438098	411586	524421	444656	351931	421131	508947	415124	504103	434929	483520	450730
10.69_915.6986m/z	123936	119586	157425	206243	170053	104501	163828	110365	118043	179599	173193	198811	116334	173385	172148	169218	219711	206355	160960	179838	199157	111737	139507	132758	238221	128791	173407	186028	162106	130496	107155	150779	134740	163780	202732	150684	112144	156884	186331	141504	143757	200464	130104	154039	174870	177945	169508	161837	161342
10.74_1067.8084m/z	145425	121695	110919	106503	122483	122969	144891	103497	132801	115666	134010	112476	122631	128539	116026	111217	111826	129750	130410	128073	141233	144659	131321	138080	130334	138849	118370	100449	118434	117092	140551	140598	96030.9	92110.2	122425	130690	136362	109102	89542.2	117677	97330.7	103279	101077	105136	124818	110975	116984	116271	125052
10.76_1053.9297m/z	35907.8	12076.2	13818.9	23822.2	16976.5	29276.1	25838.4	18449.6	45282.4	25534.3	20716.4	41652	44458.2	53718.4	59991.5	51910.7	63897.8	50513.3	78430.5	73222	88965.7	119614	90122	95024.3	82297.8	94726.2	61035.6	111404	98350.9	179984	21121.6	19673.3	45126.8	13457.2	24601.6	30689.8	40565.2	27008.5	19806.4	25395.2	25941	27653.9	43637.9	46582.6	83032.9	64330.7	72372.3	79685.5	68371.5
10.76_998.8752m/z	366562	385892	359353	345117	428436	339089	475292	291184	285386	476305	282798	257406	379582	236812	237511	290215	294793	333596	285890	336089	296447	311816	233125	277305	282022	341046	313494	308282	260948	274882	324361	459969	290050	424350	385754	330236	302369	312296	302274	275336	276070	330310	364346	255641	317332	304172	279003	275260	285038
10.77_1079.9440m/z	231711	164467	190192	162515	191548	284727	203982	204768	239411	215093	227693	214175	242273	280828	277412	212567	225246	246491	239768	195441	313916	323638	283236	329950	216272	222851	182393	284234	242286	393919	215356	232715	265941	190358	182390	241792	246645	167168	147060	241723	237579	167276	197262	239779	240170	271063	209041	244714	252841
10.77_1099.7885m/z	217323	203882	159090	139782	225145	193347	247141	136839	198779	223746	158409	145807	249745	152448	159784	164457	167602	201282	151415	129401	154171	174323	126362	182036	132502	101235	167215	175655	115897	146843	153906	248876	152587	193099	178924	204769	203496	141704	182340	169795	187833	161220	193330	142588	177564	202785	145627	126573	191392
10.79_1054.8966n	1.1382e+06	1.09874e+06	1.01097e+06	1.00525e+06	1.03085e+06	1.36952e+06	1.04877e+06	1.20116e+06	1.42317e+06	918817	1.18421e+06	1.31268e+06	1.22186e+06	1.39083e+06	1.44597e+06	1.39191e+06	1.36884e+06	1.73163e+06	1.66804e+06	1.53892e+06	1.76889e+06	1.92213e+06	1.71808e+06	2.02971e+06	1.64597e+06	2.00728e+06	1.68551e+06	1.98358e+06	2.01423e+06	2.35708e+06	1.22629e+06	1.06789e+06	1.47183e+06	958332	975865	1.11089e+06	1.2858e+06	984921	1.16634e+06	1.11975e+06	1.18882e+06	1.06148e+06	1.36474e+06	1.45913e+06	1.46352e+06	1.66734e+06	1.47183e+06	2.024e+06	1.73676e+06
10.79_1100.9474m/z	135091	137165	102605	108519	158728	133392	149718	122687	159961	135665	134418	129349	138360	124598	145724	147221	157460	180082	140068	148728	190901	174798	168424	186322	186257	162996	194807	182099	160489	180578	129758	152538	117138	138967	142228	125814	148509	130522	145256	113672	144163	129985	122082	131217	139061	150873	137869	175860	169832
10.79_172.0723n	181295	176749	166354	127084	168295	188214	167061	185614	193978	130593	159509	178364	171092	191441	184622	173016	161997	166250	169210	163521	159026	169448	159583	170499	149156	166242	144153	162570	132966	139456	186153	162591	194398	155418	151526	176606	184279	143538	159436	156359	172113	140365	172277	183377	171294	181710	153334	179833	159767
10.79_544.3423m/z	10755	11033.1	10012.7	16195.2	13125	12630.9	9911.64	13488.3	10820.4	8557.68	11909.8	10411.7	12845.1	14956	13471.9	11491.1	10512.2	11087	8048	8694.44	15037.2	13449.1	15367.4	11354	9630.6	8503.77	10267.9	10694.9	14462.4	16660.4	11236.8	12696.1	15119.4	9018.36	12124	15678.8	12611.6	8425.09	8979.43	6788.34	11692.5	10093	10616.7	15500.2	13496.8	14707.7	11967.9	13748.5	10948
10.79_585.3137m/z	80444.8	71347.6	61121.4	59805.1	74545.1	78891.5	72056.9	72740.6	85096.7	52929.7	69799.8	82980.8	80829.7	85919.8	89817.3	87328.7	93101.6	78479.9	81093.8	67788.5	73077.8	75641.9	68351.6	76381.8	57339.1	74796.2	55491.7	70942.9	59891.4	51619.8	72694.6	75867.5	95362.4	65368.5	62606.2	84258.8	84128.5	63595.7	55901.9	73925.3	75073.4	59386.4	85960.6	87604.9	86112.8	86746.4	60717.3	83570.9	75841.9
10.79_785.6101m/z	269866	271001	254185	239504	256703	317245	280071	310058	324945	257648	292548	320965	291646	298356	348716	319783	328454	369068	345690	324693	368613	386873	362005	426176	343709	410846	373068	393830	399057	458803	273508	270621	319596	268846	251561	286756	298828	258134	297666	288285	281691	251710	312774	320612	328529	379464	333615	405710	374821
10.79_860.8438m/z	17149.9	10290.4	17770.1	16567.2	9787.34	11060.3	21603.9	15988	21114.3	36913.1	16795.2	16415.5	16395.7	21394.3	22910.8	28956.1	40028.8	29435.5	22489.2	14752.3	33321.6	24971.7	45112.2	27787.9	19801.6	8915.97	25525.1	25925.5	30399.3	34013.4	20975.5	26401.2	10824.1	20392.1	8389.6	31846.4	16184.6	10336.8	12382.5	13024.1	22913.4	17539.1	27238.5	18364.5	21242.9	40723.2	21297.2	18767.8	35860.8
10.81_221.1142n	81001.8	83392.4	69150.1	60290	76776.9	81043.5	69941	85137.3	82605.1	60744.6	73102.2	82048	74695.5	83497.2	80253.3	79746.6	75809.4	75995	82452.3	77158.7	75733.3	85781.4	83465.3	75820.7	69596.1	77305.2	69157.9	74236.3	62915.8	64722.8	80475.4	76613.4	84087.2	70510.4	71250.9	77059	86632.6	69817.3	72589	70774.8	80997.3	59974	65763.2	76693.4	79752.9	84353.5	74541.4	76967.2	79588.5
10.83_1128.9310m/z	176049	169333	198864	175476	147295	226626	180277	151450	165678	120867	175136	121505	154869	155607	145941	170666	151155	160390	164146	162240	234017	191931	199211	206275	191042	162892	157873	172443	194294	206319	183775	193167	175197	172221	161676	154830	154804	164705	147108	140609	147840	142182	159043	202342	135013	141389	149467	159623	137170
10.83_836.7722m/z	2.63954e+06	3.33766e+06	3.20522e+06	4.09878e+06	3.1981e+06	2.64028e+06	2.66405e+06	4.4046e+06	2.66849e+06	8.21886e+06	4.16469e+06	3.96537e+06	2.38169e+06	3.6237e+06	2.53237e+06	3.33981e+06	3.30763e+06	2.52504e+06	3.8161e+06	5.99103e+06	3.12146e+06	2.87983e+06	5.01772e+06	2.97717e+06	7.7811e+06	6.24923e+06	3.69781e+06	4.38715e+06	5.80058e+06	4.53582e+06	3.58687e+06	2.33567e+06	3.69484e+06	2.72908e+06	6.10777e+06	4.85184e+06	2.67696e+06	4.25604e+06	3.24184e+06	4.69909e+06	2.81747e+06	3.8768e+06	2.78739e+06	3.7696e+06	3.04631e+06	4.16824e+06	4.4322e+06	4.53646e+06	3.56317e+06
10.83_898.8610m/z	57325.4	60636.3	83026.3	69652.2	37213.5	68237.3	72604.8	72032.1	48431.6	101390	64206	59412.2	47279.2	44881.3	59483.3	82328.5	99597.1	98080.6	46731.6	78447.5	112221	71251.1	92238.7	81334.3	100252	121170	105451	132960	119313	114341	60898.7	53609.5	76766.9	69852.8	49919.7	31490.7	73825	61254.6	80264.3	41784.2	52626.2	78287.7	67585	69786.5	58857.4	59793.7	79302.1	124600	77646.4
10.84_1097.9634n	189816	146328	137479	116093	185341	218846	156252	188385	238689	102494	155486	201426	178113	180041	165379	206226	184093	190263	181218	163904	137001	149820	132429	187878	146200	182850	150916	192464	194712	199029	140485	158641	209476	157288	146757	159907	178833	164844	173331	151626	186185	156534	181364	157815	164705	175914	140902	199603	141692
10.84_419.3984m/z	47763.1	46229	44587.1	33091.5	44275.7	48358.1	49576	53034.3	53917.9	36079.5	43296.2	51055	44591.1	52118.6	49974.7	47247.2	46802.2	41159.7	44365.9	41001.7	40917.2	43972.1	40102.1	47104.5	33883.1	39381.8	37036.9	35047.3	33858.9	38364.2	51107.1	43749.6	59423.6	41510.4	39884.6	46633.1	51172.8	40830.4	41404.3	41601.1	48321.9	35432.7	42860.4	49904.8	48364.6	51685.8	42478.6	44426.7	40647.3
10.84_537.3405n	285642	274217	265336	230467	261692	322146	265931	282140	292822	225169	266452	297618	271114	284604	288692	275010	276098	264881	275058	274784	280551	293053	272450	303426	253065	254994	233415	248707	235114	240847	289881	274875	298239	254151	243482	275515	308623	250720	251734	271657	282846	225141	278609	317110	289927	304922	276898	277529	284787
10.87_303.2558n	225827	226772	201531	181700	211356	225717	208153	231560	231189	188933	198106	223625	217487	214800	214550	202940	210333	198116	200708	188496	198321	209745	205457	219532	189289	218600	198650	206193	194922	188758	222334	206274	225625	207125	197599	226992	233721	194220	201065	200213	204287	194401	203922	211942	215269	209220	201953	218039	204308
10.87_596.5969n	124612	97211.9	115065	96112.1	111398	113221	100952	122887	116508	92987.5	101587	107383	111624	118964	105650	101933	109452	101161	98552.5	107729	108587	100509	107512	123078	108176	116075	103903	107722	103568	99272.4	117995	122299	122002	97968.3	105160	118813	121146	94540.3	110699	103779	98426.7	108487	93512.3	112332	103749	108972	108088	122166	96693.5
10.88_978.7572m/z	35752.2	32581.3	27084.5	22601.6	39621.2	39566.5	34151.4	41188.5	45695.1	32124.2	22267.2	39119.2	34520.5	43809.2	38291.6	32235.5	34974.6	26499.6	31620.1	39457	30511.5	45685.5	33041.7	47234.9	25833.9	33377.5	33679.5	31643.3	31562.9	27972.2	43190	26306.3	46295.4	32007.3	33228.9	37614.3	39668.9	25697.2	30916.8	24582.2	41640.8	33814.9	36804.6	38690.7	39725.6	45750.7	28923.6	34920.5	35946.4
10.88_984.7531m/z	42209.3	37588.2	42524.3	47511	58178.5	46084.3	43099.3	37338.3	43445.8	42309.8	39193.7	43643.9	44028.1	42621.8	34511.2	39500.5	37007.7	38616.6	34041.5	40113.7	26823.2	37486.5	27681.9	32502.4	26352	29715.4	32049.3	36816.3	32779.2	29022.5	36506.5	37584.1	48669	56312.4	41372.7	29131.5	35124.2	52781.8	40817.4	40470	38880.5	38582	30724.6	43359.4	36430.7	36040.3	29958.5	31844.1	31066.6
10.89_158.1536m/z	127092	124277	115398	87121.9	113325	129849	116937	127023	137061	93795.7	112435	130228	121962	127447	136218	123082	124528	121280	119234	113741	107380	121425	107724	117156	103190	109431	105431	109134	92336.6	102147	126640	110964	134519	102350	104634	127891	128931	107362	108859	114323	120230	98592	121389	132191	118916	127269	112941	128597	121739
10.90_207.0943m/z	22583	22287.9	22712.8	17626	19753.6	29358.8	28526.6	33071.7	35405.6	21031.3	27240.9	30753.2	27214.8	28877	28791	25889.3	29460	28246.2	26157.3	22248.3	22509.2	21056	20330.8	26197.7	22851	20278.4	16142.8	19973.1	20125.5	17501	22440.1	21613.4	27509.8	22928	24089.8	25533.5	30887.8	24906.1	26444.5	24887	30786.3	22461.8	25811.8	29180.2	24153.4	29674.6	23421.9	26890.9	24697
10.90_337.0680m/z	58138.9	45514.1	47292.2	38180.5	59904.1	61767.8	58443.7	57788.8	58583.8	42771.1	46439.7	51702.5	66752	65102	59366.3	66922.9	61069	42511.5	69696.7	61428.8	53672.9	47074.8	48171.1	59701.2	44336.4	45942.7	39652	42971.6	40129.4	44480.6	56716.9	37290.7	55866.6	51431.2	34081.7	57404.9	57452.1	46861	52043.6	65778.9	61154.8	43252.1	55224.9	60358.9	52448.2	55995.4	60265.2	72558.5	65654.9
10.91_1090.9399m/z	126008	129331	95695.4	98577.4	111980	121296	72009.2	86732.2	80318	87500.4	95403.5	116691	113813	108063	111604	92889.2	85523.4	130934	110382	106439	140373	177701	152605	190016	138700	117423	86485.7	103570	97527.9	102460	157326	120724	128768	69193.7	66620.3	96945.2	110170	77753.5	112644	109652	91797.8	72296.4	99733.4	94553.9	100292	120167	107227	145314	114080
10.91_829.7251m/z	384863	364212	298774	220757	249945	399786	317565	439583	411742	241937	328073	363788	328806	423571	393664	323874	285981	331021	326299	287631	259715	328913	278361	362036	282196	293189	268659	317702	231293	265373	408446	322698	447519	302246	245019	331758	396948	254651	290672	366573	346522	219906	330800	390239	293539	383717	266043	339158	305026
10.92_1513.4606m/z	51953.1	24364.5	8757.48	14138.7	18733.2	27068.7	51942.4	17274.1	13062.9	22718	28136.7	10132.1	21704.2	20086	13236.7	35903.4	3331.86	15233.2	32895.6	23923.3	47507.8	22356.5	22856.3	91070.6	28678.7	18444.2	24506.5	5140.62	9999.31	17256.9	32186.1	25777.1	25835.4	13735.4	34573.5	12265.2	51143.4	17632.9	17501.1	19176.9	14167.6	13455.9	18837.8	13854.6	15295.6	15152.1	23671.1	47701.6	36252.1
10.93_1272.0362m/z	37427.1	79759.4	45479.9	53190.7	69624.9	61615.7	50024.5	79410.3	64485.5	47667	40791.5	111352	52808.4	64600.7	80068.2	67118.4	45993.8	55861.9	88731.6	43037.8	45970.6	57296.6	59000.1	71959.7	54316.2	79980	51324.1	55954.8	69933.9	52722.7	87567.7	21101.5	52071.3	66643.3	54124.6	53709.2	67745.7	52230.7	50433.7	69415.4	62606.1	42814	56552.2	79330.4	47677.9	37158.6	65798.5	54481.1	44412.5
10.93_618.6097m/z	46052.8	42562.4	40363.6	32389.9	30910.6	35337.2	53022.8	38529.2	31745.1	31303.7	38534.8	28316.7	41464.5	42453.4	62158.6	60269.2	51465.6	46550.1	29987.9	26229.6	36538.8	33826.1	34804.6	41947.9	50451.9	66766.4	54445.3	61138.2	34426.6	19756.1	32702.1	40292.1	29220.7	38538.6	30709.5	41852.4	36596	36782.4	38929.4	44594.8	42034.2	36441.8	61853.4	64822.8	44154.8	52884.8	28745.2	39519.4	33560.3
10.96_603.7778m/z	105425	67723	87989.3	57136.7	86950	41422.8	88187.7	17505.2	30540.2	62550.1	55840.2	76987.4	59947	51497.3	39666.1	85448.2	69813.2	109145	184942	212457	304357	97539.3	323735	68130	455580	310547	450584	109208	658368	474323	32873.2	169804	21219.5	101322	73465.8	72869.5	53674.8	52451.5	71449.5	92632.5	62977.1	30315.1	85638.1	36315.9	82471.4	93330.6	122944	112901	194178
10.96_603.9796m/z	20789.8	8817.63	15748.5	12481.6	66.5366	8237.01	22320.1	25427.9	25081.7	25141.3	13310	54711.9	38845.4	8126.26	3720.67	11355.1	13613	38358.9	100822	18988.3	218915	58393.5	111730	33509.6	45583.6	34018.6	78619.5	145021	474485	148919	18592.4	17664.5	15971.6	36566	22742.3	29449.5	24795.7	41240.2	2865.03	80218.3	24426	3401.98	5085.19	8038.37	22604.8	21830.4	26200.3	50783.8	143232
10.96_912.8738m/z	436973	405414	667900	523594	289458	490678	502373	396466	278431	633383	483115	294340	347698	328934	355954	575450	469912	621727	396086	471966	588976	320778	558579	464059	542673	581219	655101	912073	672096	744373	507051	445575	340247	480733	403358	389956	502521	497171	512947	442858	409724	605651	427842	410524	319858	365272	528485	657530	593664
10.96_939.7191m/z	62294.7	53040.6	33534.7	91791.4	70771.1	34628.4	56483	67066.2	65487.3	57268.5	68508.4	22046.9	57538.9	72675.4	37956.9	55165.7	77984.4	51351.9	47822.5	77832.8	52987.3	73184.6	89993.8	36894.3	32981.4	110475	58564.4	79465.4	29463	74236.4	58930.1	28029.9	38119.3	47018	88378.7	97062.5	29605.3	40973.9	87784.5	20190.8	53752.3	84687.9	49862.8	55295.6	84464.1	59124.2	87390.1	39662.7	81940.8
10.96_974.8764m/z	267265	187080	207945	275341	316146	281823	263932	236139	253200	262619	282135	308471	236784	286422	224085	199115	334087	240862	392249	354901	334240	264428	471753	265691	348868	338763	335900	309684	365322	379367	187163	155070	190651	223646	398146	310318	253221	266471	238935	256616	163267	270971	220680	285342	269348	344265	341006	320896	267541
10.98_577.5832m/z	18903.7	22470.9	25788	132787	75282	29917.7	28816.3	16623.9	39601.6	76156.1	55213.8	109869	19958.1	28530.1	19170.2	21108.3	109553	27249.5	40724.6	59854.5	58237	39506.6	123843	27946.3	102944	149976	124950	69993.9	69492.8	91613.7	23932.8	16345.5	16722.3	30202.1	89636.5	23929.4	29588.3	50801.8	37146.9	43279.9	34352.9	69552.6	20852.2	31965.1	58460.8	16814.9	40183.3	61374.6	108226
10.98_851.3157m/z	16176.4	157010	156701	22706.6	47223.9	116079	80342.3	24359.9	47061	38772.2	43347.7	40641.1	91588.1	41542.2	42656.6	55403.6	1012.38	52622.3	69013.9	19117.4	14888.3	39809.8	22650.3	35845.2	11895.8	25003.5	39813.5	27204.7	24824.6	38952.1	43304.8	46198.7	48857.1	66712.3	22326.3	55718.5	44761.5	39848.1	55318.1	53099.1	77272	33120.1	39487.8	27645.3	65183	132504	89830.9	18176.4	53363.8
10.99_851.0730m/z	59485	180963	198680	65521.4	92354.1	192230	197342	84759.6	137446	94308.8	85496.4	85477.8	139658	93223.1	91858.5	122677	60095.7	83734.9	101530	52319.9	48364.8	65282.6	65182.9	95941.6	64836.4	84267.5	78657.1	84626.2	36886	96247.8	97863.1	54597	110452	140807	90263	162327	95239.5	95674.1	96195.9	100064	132071	72977.7	108094	115910	91307.5	142128	108055	47304.2	76833.3
10.99_903.6224m/z	154894	192322	187876	150283	211391	112365	148275	101624	120577	305011	135713	124503	150380	95799.2	117746	131402	182728	124877	114163	124800	133294	85256.3	116183	109376	133045	107801	158033	112907	98487.6	119127	102036	181269	100636	143616	183351	140868	120612	113807	238271	160049	130695	183653	149800	119608	135396	134469	149306	99057.4	134207
11.02_914.8898m/z	137878	96661.7	138888	108996	79288.1	100006	126866	96999.2	117554	157316	87122.3	96151.7	104006	99107.8	108904	157372	184800	140591	102926	113930	229602	151246	197776	191964	110945	101263	202597	155887	175625	281047	117726	166541	88394.4	128564	94306.6	142007	99645.4	75220.9	69900.5	98648.2	163740	152299	104923	90733.3	106869	142126	126197	174820	177837
11.03_903.3631m/z	6604.28	17486.1	10549.7	6220.66	11730.8	17280.8	36863.5	28537.2	19474.3	68241.9	59061.6	56525.8	98000.8	88537.5	43626	40218.3	17149.6	15050.8	3588.81	17576.8	1505.84	10263.9	14270.9	10967.7	2934.04	7312.29	7259.47	5092.69	17916.5	7499.57	22821.9	14217.1	18988.8	22950.6	21064.8	19820.2	26870.7	104904	81720.8	78479.1	46479.1	4035.62	24190.1	38118.6	14938.1	15649.3	6606.37	12395	6899.19
11.04_207.0990m/z	7674.14	9702.74	8937.71	7716.28	8485.41	8858.4	9620.92	7392.98	10322.2	8323.72	7908.3	9058.5	9501.15	10519.9	8208.68	7511.41	8397.27	9663.32	8414.79	6417.64	9218.85	10111.2	8653.5	10322.4	7017.88	10351.8	10201.4	8719.93	5265.41	7692.37	8419.51	9739.55	12111.2	7615.97	8033.08	9191.69	8186.4	8228.23	8276.61	8849.06	8371.36	6695.47	8530.67	9156.71	7847.81	10238.8	9747.07	8003.4	8976.9
11.04_604.6027m/z	15454	19779.4	19796.1	24551.6	21920.8	16754.6	17655.5	21260.8	26739.7	30680.5	27727.2	33639.1	24394.7	15546.4	18480.9	29582.7	29005.6	24940.4	20625	24395.8	46757	31426.9	41792.9	35259.3	35773.9	49696.3	37615	63259	53981.3	58173.2	14490.7	20043.2	22002.7	16635.1	21291.7	14834	25743.3	32082.6	26626.4	24655	27870.2	20869.1	24128.3	20590	22402.3	22143	32796.1	29190.2	30125.3
11.05_647.5011m/z	342960	337302	302497	274506	328921	324046	316884	317063	341399	286232	302805	327314	312483	327109	326535	300315	321909	311456	322033	303765	292606	314363	283869	329296	298380	305924	319231	310947	286265	275804	338673	302425	338131	285717	294611	310299	325580	303381	306587	299788	316508	273555	325966	295336	307988	325752	309997	322294	317599
11.05_888.8737m/z	80957.9	40042.4	61233.4	57679.4	40988.2	42252.5	59901.7	39541.6	62922.1	88601.6	55655.2	46342	76021.6	66844.1	74332.8	116257	127566	111840	65885.3	60384.7	114324	94167.9	138398	99585.3	60078.7	51086.9	128877	102908	106026	169851	61648.7	81334.4	36823.3	71058.8	30935.2	76582.6	58288.5	38826.6	44797.1	61175.6	74407.7	47890.6	74162.3	54082.8	78446.7	133261	64276.4	87306.3	125906
11.06_719.6328m/z	24977.8	32171	25010.9	25496.1	26982.8	13208.3	21680.7	19421.6	33921.1	22242.7	21740.7	24472.9	28562.9	20620.9	17993.7	25230.3	27879.9	23636.4	22805.1	25988.1	24895.9	25952.5	39676.5	22003.4	25957.7	26302.1	25895.9	31518.6	34048.2	35566.3	30386.3	17731.7	29251.2	17476	17378.1	13090.5	25081.5	21043.2	23758.4	22863.8	23141.7	22414.3	16152.2	15959.3	15927.3	31526.6	27950.3	23336.9	28981
11.06_950.7373n	4.06262e+06	3.74199e+06	3.39128e+06	3.2698e+06	3.75679e+06	3.76491e+06	3.79763e+06	3.84959e+06	3.74412e+06	3.36738e+06	3.53147e+06	3.75677e+06	3.6571e+06	3.65511e+06	3.59492e+06	3.46943e+06	3.58259e+06	3.60903e+06	3.67062e+06	3.29911e+06	3.17344e+06	3.55517e+06	3.26829e+06	3.68698e+06	3.22116e+06	3.40662e+06	3.28786e+06	3.36404e+06	3.17063e+06	3.07641e+06	3.89784e+06	3.59094e+06	3.909e+06	3.30661e+06	3.44511e+06	3.57059e+06	3.84242e+06	3.32482e+06	3.64979e+06	3.37205e+06	3.64581e+06	3.27872e+06	3.47955e+06	3.41457e+06	3.53643e+06	3.67671e+06	3.29607e+06	3.54752e+06	3.35209e+06
11.07_199.1097m/z	21294.8	18546.4	18655.8	14506	18805.6	18246	17724.2	18782.8	20914.4	16224.7	18767.6	21679	20385.5	21670.7	22287.7	18488.4	17392.7	20345	18181.5	18751.4	15881.4	19561	20290.2	18898.6	20053.4	18002.4	20284.1	19414.5	17969.9	17873.3	20001.4	18709	21321.2	16766.5	16654.9	19249.2	18386.8	16995.2	17562	17046.5	18637.6	15724.1	18953	18682.6	19760.3	19978.6	18737	21026.7	21474.3
11.07_632.6306m/z	151128	158669	156828	147023	118635	166653	141882	140170	139123	165173	154938	147336	133049	150003	149621	200153	183629	183209	151458	181903	202111	175490	207559	199124	214349	209081	211421	260668	243078	259041	164055	153515	138412	146306	114940	135053	128739	154234	141771	153523	166978	159377	158481	154316	163903	176989	168209	194031	175406
11.09_957.7702n	241719	207913	184176	164080	214488	198183	176254	174435	210915	155716	201022	213752	232321	230545	210302	225254	204080	221727	207299	203303	187303	221132	197344	243542	192646	200632	207355	192514	172302	162537	222126	203350	238923	170098	162454	179657	204755	177592	188823	189240	203998	173358	201622	217398	220656	195596	181546	203478	170290
11.10_397.3814m/z	30949.6	26853.4	29753.1	34391.4	32522.9	64752.2	47280.1	31022.3	35238.4	25814.2	31401.4	39180.3	40213.3	23633.5	35872.1	29339.3	31662.4	37797.3	31858.8	35079.6	51083.3	34989.4	35614.3	42432.4	44946.1	60233.6	41386	50522	47053.4	44972.1	37666.2	45736.5	31295.8	36252.1	32980.3	30158	31730.1	27904.6	33681.2	33110.3	29719.9	28757.6	25005.4	30509.6	30320.3	32409.2	36780.4	33517	26130.2
11.11_114.9517m/z	9415.08	9196.44	8577.7	7636.82	10253	9038.75	8802.53	9845.06	10672.5	10809.6	10635.9	11213.2	12076.5	11283.4	11564.2	9001.03	10256.5	10596.1	9172.23	9454.16	9020.87	10281	8150.83	11767.2	6296.42	8324.78	9426.43	9397.53	6583.97	9810.53	11343.9	10244.8	10202.6	10019.6	8740.12	10081.9	10782.7	9706.28	12427.8	8543.71	9251.46	9707.52	12272.8	9209.94	9984.16	10209.9	8545.1	9637.75	9004.04
11.13_834.7631m/z	3.23559e+06	3.23208e+06	2.95511e+06	2.88974e+06	3.09086e+06	3.27268e+06	3.07812e+06	3.2456e+06	3.28827e+06	3.08207e+06	3.15088e+06	3.20614e+06	3.12465e+06	3.17812e+06	3.11953e+06	3.22673e+06	3.13079e+06	3.18574e+06	3.16218e+06	3.1174e+06	3.19396e+06	3.1702e+06	3.13175e+06	3.29673e+06	3.06293e+06	3.28227e+06	3.24158e+06	3.22053e+06	3.02789e+06	3.16552e+06	3.28255e+06	2.99234e+06	3.31304e+06	2.84931e+06	2.92838e+06	3.14189e+06	3.251e+06	2.94464e+06	3.11587e+06	3.05474e+06	3.15502e+06	2.86809e+06	3.08129e+06	3.19878e+06	3.14735e+06	3.26597e+06	3.1666e+06	3.59457e+06	3.24515e+06
11.16_620.5950m/z	49819.2	56216.5	38448.6	43091	48264	46824.9	50704.3	48721.6	46227.3	56069.8	42923.2	45991	47507.2	52065	47524.2	47217	48104.6	51654.1	49863.6	50113.5	45960.7	49460.6	55038.7	54725.5	45927	51526.6	52379.9	48153.1	52667.2	49220.5	45826	42206.3	47068.1	38610.1	51534.6	49442	48430.2	44121.2	48293.2	54075.8	46131.1	38533.3	50005.4	55005.1	52632.9	50552.5	52487.4	59729.2	57115.5
11.16_752.5555m/z	40133.3	39709.4	41040.3	33042.2	35131.5	44188.7	41021.6	38940.3	42193.1	38736.6	40163	35275.5	36208.2	32759.5	38720.5	41698.6	32472	39137.3	35083.4	31646.3	39530.1	36248.9	41638.6	34891.5	38474.1	29417.3	32928.9	43209.4	45481.3	39872	30514.8	40461.9	34370.4	31960.6	34851	36205.8	36172.3	32671.5	32229.2	33995.4	32560.9	30148.9	38566.5	41730.6	42796.8	37444	36345.5	36753.7	36485.8
11.17_259.2434m/z	13870.1	14032.1	10384.8	18378.3	15706.6	11218.6	14406.4	12893.1	13093.8	14942.5	13198.6	11897	13211.1	11535.7	13250.4	12724.4	11616.5	17133.4	15401.6	17446.1	10277.5	15284.3	15409.6	11650	17729.8	18500.6	16272	19383.6	24326.1	16693	11450.8	12708.3	13788	16740.9	12556.8	12254.4	14990	13734.2	12201.4	12939.5	14738.2	12667	13010	11978.4	16215	14253.6	12610.8	18058.7	14440.3
11.17_705.6923m/z	250552	240630	193922	184985	233998	232420	215199	238493	223184	185038	203370	218280	214870	221823	212761	209500	199458	198646	216373	193125	199273	217608	183700	216584	178611	210637	178921	206788	206167	208741	236978	224456	232578	213957	198513	224490	220496	199818	198565	202315	216681	184058	212596	204181	224648	224415	196517	221454	203459
11.17_710.6725m/z	321655	322423	278972	289104	327312	313875	270189	312045	315329	294457	287548	322507	289678	305633	301311	264401	278926	295563	291134	278229	277489	285826	358283	296483	277916	335535	335519	373708	326273	374490	333479	319961	353582	309561	289093	279775	308092	297113	314506	278638	324150	280812	280230	261320	290159	317483	320286	305960	303593
11.18_719.7071m/z	286400	279887	249579	247308	262999	268165	252287	256299	300442	254102	266112	275090	255050	266402	251268	262063	273537	254108	274053	235106	250213	252022	263868	274398	234928	241845	278028	277177	251481	267959	278304	242678	255426	250108	232377	255981	270694	262666	268674	301163	310318	245596	259677	246566	238373	249144	228253	254553	256426
11.18_778.7652m/z	137794	128844	111957	124922	118715	133141	108119	121816	113683	110451	112778	113971	115052	122580	118438	121278	123259	109750	124333	122797	110511	119399	115471	129959	125651	116852	114906	115795	115092	115648	128659	118414	121154	106479	111411	122979	121105	114577	119333	125742	116172	99986.8	122132	117920	121298	123152	122403	116519	118124
11.23_1054.8140n	1.04653e+06	875693	773244	877040	782068	1.05297e+06	756077	930604	1.12314e+06	821273	834708	1.08673e+06	925322	959750	975868	943639	1.01216e+06	1.16328e+06	1.16018e+06	1.26068e+06	1.37303e+06	1.4602e+06	1.76687e+06	1.76308e+06	1.27739e+06	1.68114e+06	1.39669e+06	1.55943e+06	1.51304e+06	1.94193e+06	929433	842243	1.1157e+06	747911	724929	859747	1.07619e+06	742546	920144	809244	889980	683132	917605	1.06321e+06	1.05558e+06	1.21739e+06	1.01485e+06	1.66599e+06	1.40762e+06
11.23_1099.9129m/z	203651	193443	180980	170549	182190	189713	198355	173576	196171	157061	157418	190771	181333	193224	177377	170287	178572	161766	181623	163777	173183	201749	170524	197535	165514	204066	173869	209865	178461	158155	228624	184344	196960	177683	168677	166272	180487	164621	152662	178675	146463	149072	166701	160884	160283	186798	169571	208085	177509
11.23_1739.5601m/z	34890.8	15013.1	12751.9	34790.5	58919.3	16489.7	12628.9	8062.98	23024.3	42869.3	25361.2	37151.5	20812.3	7682.11	5534.99	28870.9	59482.4	30660.2	41264.6	84209.2	69763	35603.8	76894	42355.7	37132.9	168667	53057.1	57922.4	83826.5	153452	15378.2	8450.77	29109.7	17671.2	32471.4	17649.7	16642.9	34260.5	68694.7	26444.2	43632.6	36564	11225.3	30177.1	42868.7	28556.1	62264.3	55618.6	50134.2
11.24_1055.9020m/z	575665	464405	410329	393574	366045	635276	366087	526938	628696	365506	453033	544223	561490	576065	599403	500302	533596	780392	660347	696865	838424	938198	924124	1.13234e+06	633245	804414	765636	940683	792680	1.11767e+06	548657	475217	634450	344605	334209	410957	635010	367516	455715	394085	458345	334121	561901	593763	581680	760170	551567	995443	811963
11.24_1114.9603m/z	318214	298829	272933	264188	279037	355043	284209	313270	326188	226895	272740	322695	306973	355945	324842	319546	302421	383916	309207	279876	319274	374272	317748	418320	244842	324587	343228	426706	361259	422539	338641	323632	383046	226213	234198	264659	331472	277837	222066	261381	294628	244453	311624	335402	291362	368426	284987	356310	299364
11.26_634.5864m/z	80758.7	71768.3	74819.2	79656.1	73336.5	85263.1	85776.7	80719.5	83985.9	83838.7	79038.4	78645.4	84252.4	64978.4	58739.6	74894.9	109013	83720.8	82682.8	93828.2	80988.8	67707.9	107037	69143.1	76039.1	87511.3	88251.3	84247.3	81907.1	91454	87122.4	66404.4	69880.5	87196	104783	67161.4	82029.8	84740.5	88765.1	77498.8	88395.8	87361.3	76236.7	73908.3	80082.7	84692.9	73424.9	82120.3	99817.5
11.28_1013.8146m/z	1.31107e+06	1.21281e+06	1.13118e+06	1.09459e+06	1.2247e+06	1.23266e+06	1.18726e+06	1.19479e+06	1.28562e+06	1.21836e+06	1.15689e+06	1.22741e+06	1.30236e+06	1.20815e+06	1.18177e+06	1.22765e+06	1.2803e+06	1.21542e+06	1.21067e+06	1.19685e+06	1.1559e+06	1.17206e+06	1.16509e+06	1.18858e+06	1.18318e+06	1.18778e+06	1.24387e+06	1.19044e+06	1.14086e+06	1.18873e+06	1.2665e+06	1.19041e+06	1.24336e+06	1.16648e+06	1.25314e+06	1.23862e+06	1.23349e+06	1.18435e+06	1.2143e+06	1.19773e+06	1.32717e+06	1.10101e+06	1.19372e+06	1.17905e+06	1.23837e+06	1.25336e+06	1.15835e+06	1.22556e+06	1.21652e+06
11.29_632.6285m/z	103271	76606.3	81773.6	95738.5	88687.2	87929.9	101055	74250	83224	105726	79777.3	88286	119630	77432.2	70431.5	105597	136333	110841	99933.4	99109.6	125276	89623.5	138054	93657.5	111476	132443	115169	135778	116572	147339	82081.8	82954.6	71209.1	87337.4	107130	78482.6	89353.1	102648	89987.4	83469.3	109822	109838	84056.9	78529.9	108876	97541.9	118886	107026	125833
11.29_998.8959m/z	381078	367051	342951	325439	345108	386632	508898	339505	412694	391538	303403	302365	430778	311211	302633	348985	476165	377961	324948	346916	381721	362288	335166	361417	359610	321586	466370	359274	332024	340534	380354	359033	341262	378118	427316	327766	346228	407776	327227	326749	361136	317995	333011	318202	342860	351337	304783	322457	396472
11.30_916.9058m/z	66986.6	31688.8	50127.6	44104.6	28628.1	61726.5	64609.1	51565.1	73427.4	101810	52727.9	44531.6	76488.5	73473	77014.5	110686	127684	121887	67984.7	87850.2	145111	85578.3	162506	118099	77330	59854.3	135467	108732	139001	209163	59525.7	79449.5	41284.9	67630.3	28863.9	54232.3	59430.2	42723.2	40285.6	60575.5	80864.6	50645.5	92560.3	66065.7	95044.8	128667	67283.5	111246	131268
11.33_1870.4718m/z	7652.36	1563.46	1369.29	1975.95	1702.91	1865.53	556.327	11273.3	2091.88	54572.1	1094.25	7299.09	24731.4	9333.66	3886.38	4963.26	1813.2	1926.23	1244.43	375.597	343	374.388	122.283	403.455	594.125	668.114	368.68	774.279	585.417	765.106	478.519	1594.34	2791.97	1287.83	2772.06	13735	2181.45	12164.1	1141.94	4184.6	9534.38	10759.3	25235.7	5650.2	16950.3	5307.39	1906.57	1208.26	440.48
11.33_948.7980m/z	342387	314693	270627	265796	316772	318029	319093	298723	328827	327989	303337	333148	314392	311633	304984	337260	315530	301206	323078	298342	277967	295031	276756	297977	307510	304881	305758	287193	291981	293985	327893	303144	303617	295998	317616	295742	313338	285121	308894	312698	334851	271963	323498	315925	301987	315361	300264	295692	315045
11.36_836.7975m/z	421207	495693	398711	416986	443180	581021	432672	474909	454797	453037	542160	418998	444974	406740	428049	439961	415712	578958	443341	461459	852713	453292	556686	594234	452062	607339	699329	743804	519657	922390	507659	381128	457778	364636	419317	383330	526409	408642	398604	391515	473811	399354	455706	454672	423951	461992	409771	931328	450741
11.39_733.7214m/z	261782	254372	238689	225251	249766	263902	226723	248065	237936	207098	213703	234596	225758	225693	246884	234751	238941	220659	274010	225604	212656	243888	216778	272139	235772	231548	245939	270642	232670	235493	276707	258798	273182	219343	231156	238404	248615	225825	220144	247500	231640	200070	223069	226764	257378	230095	220210	227235	232564
11.41_915.8996n	75638	51899	53519.7	59727.8	53339	55589.8	63450.1	57469.8	64124.3	55619.1	64229.1	65170.2	58455.6	58260.4	60660.6	70069.8	61961.2	55141.1	61078.9	57955.5	70094.7	60886	80284.5	68537.8	62015.6	60503.9	73587.6	70784.6	70001.9	90558.8	76709.2	61543.7	66068.1	56308.3	56877.1	59308.4	57600.6	52498.2	62406.9	56500.8	70350.9	45067.3	55834.5	51138.2	57597.2	65913.1	56936	56932.1	69473.6
11.47_1083.8553m/z	69856.3	74146.5	50538.8	63903.7	61208.2	66442.2	60256	55314.9	48915.5	73127	57860.9	61268	62130.5	58116	54981.5	63860.4	62711.4	41085	59434.9	41857.7	67556.5	86894.5	75358.4	99592.8	92673.9	121723	118839	107742	76783.5	79396.7	62043.1	65906.2	65627.5	51103	56126.7	48645.3	74963.4	48253.4	64612.1	61522.5	52421.5	41844.5	43908.3	51737.8	55215.9	44431.8	44534.8	60880	51626.1
11.47_628.4945m/z	19957.7	26319.5	18396.7	25780.7	16358.6	21858.9	16464.2	21781.7	23559.6	19402.8	18755.3	21650.4	19852.9	19458.1	19637.5	19353	20703.9	19993.7	17760.8	20788.5	20772.4	18809.7	16717.7	21179.4	22887.3	16858.7	19655	23248.3	16780.7	18567.4	21672.3	19408.1	22324.4	16720.8	20249.3	18242.4	19900.4	19847	16986.4	21388.8	20336.6	15899.5	18988	20358.9	18714.8	19372.8	18687	19843.2	18122.6
11.47_633.5848m/z	205042	187465	198523	194244	201456	197439	225018	189383	215460	229930	188251	201551	258773	186845	187318	217308	319526	230013	229080	215809	235661	189966	234654	198240	209619	250268	229989	254793	217797	242801	198304	191138	210140	175154	217883	196527	209465	241115	197462	204555	237681	215412	181112	191285	210504	210930	196839	207541	238560
11.47_932.8640m/z	4.17808e+06	3.94959e+06	3.88432e+06	3.93499e+06	4.36699e+06	4.09518e+06	4.65908e+06	3.91652e+06	4.31994e+06	4.42725e+06	4.04482e+06	4.14876e+06	5.0056e+06	3.75041e+06	3.72497e+06	4.09869e+06	6.10796e+06	4.2773e+06	4.35839e+06	4.47126e+06	4.79413e+06	4055809	4.68231e+06	4.14646e+06	4.23887e+06	4.94938e+06	4.77259e+06	4.69021e+06	4.26219e+06	4.71003e+06	4.06601e+06	3.84348e+06	4.24502e+06	3.85603e+06	4.75598e+06	3.89345e+06	4.0089e+06	4.93136e+06	4.15137e+06	4.10247e+06	4.48628e+06	4.42321e+06	3.72243e+06	3.74915e+06	4.22643e+06	4.31982e+06	4.29501e+06	4.28656e+06	4.87983e+06
11.47_991.9129n	672842	609579	615118	646815	714358	638370	798737	560146	653987	770850	654940	625667	876491	539423	514993	672044	1.09839e+06	701538	689690	705132	850139	598264	792178	650219	737510	867234	854755	848925	726847	862280	643101	611071	642298	599755	796792	574722	629822	831915	648691	666655	739227	761575	592332	552415	681176	678583	678562	650797	803857
11.48_1109.8711m/z	69536.7	75327	59998.4	77080.4	69326.6	83750.4	87589.8	70444.7	68644.4	94943.6	71942.3	94362	105310	63118	73007.3	82738.6	108921	74222.8	86168.6	85000	87569	84007.5	91064.9	94645.7	83732.8	105444	101698	101822	90034.4	126774	97500.5	63728.3	83639.1	72169.7	70094.3	65454.2	84066.8	91885.4	66030.9	61997.2	89948.2	85898.9	76725.4	50632.7	60998.3	90786.7	72574	80860.3	80217.7
11.48_581.5394m/z	45167.2	31428.1	38296.4	33626	34120.8	33856.9	28255.9	29347.9	30296	21378	27027.3	25388.4	26793.3	27373	29132.8	24875.1	28917.9	35959.3	32050.2	29993.3	25246.7	25092.2	30489.6	29273.3	24290.4	27468.9	33032.6	32231.5	30967.9	30244.9	32183.8	34889.9	38132.6	23134.6	24497.8	31310.5	26625.6	24476.3	23006.5	28225.2	30868.5	25771.1	28969.2	28976.8	31249.5	28953.2	26741.5	29755.8	25733.8
11.48_607.5676m/z	131794	112547	106047	112779	125113	116613	107267	113622	129644	125265	114629	127920	114455	116615	117612	123928	140117	125169	130143	138044	130545	136460	143803	133194	123133	147069	141377	150714	132435	151931	106130	103163	122762	106752	113924	117384	124153	114878	124367	117294	128010	113176	113596	110487	120106	127030	126377	140445	140666
11.48_906.8480m/z	3.60388e+06	3.29917e+06	3.08039e+06	3.23849e+06	3.44225e+06	3.42179e+06	3.2526e+06	3.31969e+06	3.68064e+06	3.86195e+06	3.10426e+06	3.49969e+06	3.48491e+06	3.20421e+06	3.18669e+06	3.53324e+06	3.90876e+06	3.54808e+06	3.81495e+06	3.8751e+06	3.85107e+06	3.65879e+06	4.55014e+06	3.77669e+06	3.67791e+06	4.41515e+06	4.21156e+06	4.4179e+06	3.90611e+06	4.60326e+06	3.43783e+06	3.12931e+06	3.58878e+06	3.01476e+06	3.28541e+06	3.38956e+06	3.47654e+06	3.35333e+06	3.35874e+06	3.41023e+06	3.45305e+06	3.23282e+06	3.14541e+06	3.19089e+06	3.51072e+06	3.69492e+06	3.57487e+06	4.15123e+06	4.11235e+06
11.48_965.8985n	549053	494188	456518	560327	540584	566385	508755	476821	569128	641712	461000	527852	508229	432908	456266	569880	685698	619717	590061	705756	732000	615898	886437	640698	678206	859136	797480	865821	717892	939773	540201	484257	583422	482229	500238	509293	560525	527998	518742	527363	520159	487063	476117	520829	568751	578699	555243	737406	798755
11.50_1000.9223m/z	178652	213942	206754	204403	233599	211165	373820	213545	257887	299349	198553	183727	397737	167653	165104	194264	652133	240588	196697	267641	260444	203148	209557	211765	247630	237879	315989	288687	222501	258290	197956	190593	213946	259698	361568	193247	193711	408144	225907	221117	245036	237771	169723	155605	208612	223874	191201	205479	307518
11.50_659.6065m/z	134081	115829	112174	118193	119905	135633	159790	112244	125780	125361	122451	113225	163868	118664	115095	127749	210817	144521	129227	133004	129460	124763	119826	114207	118518	134954	146677	139166	125358	133922	132597	135935	105696	118488	130459	107191	120126	148611	122631	123733	141895	124815	123459	119606	139147	143940	120608	118243	156910
11.50_940.8468n	1.26351e+06	1.17091e+06	1.25697e+06	1.15389e+06	1.27476e+06	1.26494e+06	1.9912e+06	1.10868e+06	1.40796e+06	1.63792e+06	1.18011e+06	1.0933e+06	2.31161e+06	967307	997551	1.20859e+06	3.9403e+06	1.3909e+06	1.25213e+06	1.49326e+06	1.58217e+06	1.24239e+06	1.26214e+06	1.21737e+06	1.32915e+06	1.48246e+06	1.82424e+06	1.53441e+06	1.21981e+06	1.43699e+06	1.17683e+06	1.16984e+06	1.11307e+06	1.3037e+06	1.87972e+06	1.04728e+06	1.09666e+06	2.22559e+06	1.23259e+06	1.31111e+06	1.56035e+06	1.43611e+06	1.00471e+06	1.01055e+06	1.31521e+06	1.36826e+06	1.16324e+06	1.10755e+06	1.7822e+06
11.51_529.4629m/z	18646.7	19493.7	18041.4	16003.8	16703.8	21326.2	16491	21154.9	21889.5	17504.3	14202.7	21205.4	20132.1	19815.6	23132.1	20741.1	19182.2	27404.9	23439.5	20123.8	25953.7	24531.8	26758.9	26014.9	22782.2	25204.2	21620.3	23498.3	24729.4	33124.5	18379.2	17772.8	24085.1	15648.3	14554.6	17214.7	18749.1	16894.7	16223.5	15258.7	18781.1	17679.4	19271.4	22462.4	24856.8	26759.8	20398.2	27256.2	23777.7
11.53_1026.9357m/z	68490.7	69224.6	69080.8	65506.3	72357.5	77466.3	117292	73556.3	74558.4	76710.5	54200.8	49715.9	81040.1	57159.4	49611	64219.6	95744.4	71910.1	48335.7	76681.6	95578.3	67648.1	74767.2	67313.3	72140.5	71028.9	89672.6	85486.8	77684.2	85739.7	68135.7	63827	81401.2	79858.7	101215	58331.3	61573.1	74188.7	55776.2	51463.1	55766.7	62604.1	50095.5	43530.4	60878.1	63437.4	53380.8	59228.8	90229.5
11.53_984.8901m/z	693448	646245	740119	651133	691207	734368	1.04842e+06	724671	860179	926303	716009	644918	968691	662644	643226	809385	1.07612e+06	756828	727448	808205	752709	692333	724762	723752	758403	697958	935309	711171	627421	671395	679985	699865	674110	850786	952415	683088	746176	948744	748789	725944	804164	743568	715820	690891	756665	760558	650944	679410	872057
11.71_661.6195m/z	348692	312504	308342	286230	324554	329331	334429	294611	343452	311953	301159	330798	335975	319005	312238	320534	413072	316694	334533	322301	316093	314668	285550	308970	287814	293274	321390	307821	303423	282963	319098	303068	363857	311729	313446	299654	315130	337961	328637	312899	330716	302014	317461	315795	321693	317464	296047	313767	340072
11.72_1019.9448n	293713	242720	278158	268591	287188	350952	329226	296102	362188	307980	308647	308672	410978	270248	262516	325886	639389	330748	353631	298596	327644	319257	302057	303958	327540	374502	381864	335675	268444	282559	272946	267752	334252	297262	335292	315280	312187	409423	314181	314518	355879	304852	279150	310600	333544	310208	301003	307368	335619
11.72_380.2234m/z	39472.8	44873.9	38724	27853.1	34198.2	32383.5	34755.7	35369.5	33216.6	31548	27585.8	40651.8	35913.6	36907.8	37205.5	35624.6	37427.6	35485	35556.8	34018.2	30882.6	32805.3	32585	32181.4	34441.6	36184.2	38216.8	33329.9	33741.3	32758.6	43780.5	36287	42638.3	37018.6	34557.5	28041.5	33632.1	33435.2	36426.9	29213.4	35652.9	35013.1	34806.3	30040.5	37478.3	39102.1	35455.6	36084	33960.7
11.72_942.8625n	1.46534e+06	1.32135e+06	1.36687e+06	1.31139e+06	1.37392e+06	1.54012e+06	1.63322e+06	1.43668e+06	1.62683e+06	1.53777e+06	1.34682e+06	1.43956e+06	2.05834e+06	1.41205e+06	1.31644e+06	1.53792e+06	3.28068e+06	1.53722e+06	1.64322e+06	1.57881e+06	1.66434e+06	1.45602e+06	1.38316e+06	1.4166e+06	1.4528e+06	1.6698e+06	1.67188e+06	1.7019e+06	1.39704e+06	1.63255e+06	1.43782e+06	1.32456e+06	1.4661e+06	1.38075e+06	1.71735e+06	1.36068e+06	1.47601e+06	2.06071e+06	1.44461e+06	1.50986e+06	1.70347e+06	1.52696e+06	1.37044e+06	1.3688e+06	1.6165e+06	1.62412e+06	1.42015e+06	1.49689e+06	1.81435e+06
11.72_976.9256m/z	236483	212840	209123	192753	228067	249474	224810	245638	288292	242524	223874	276429	244774	219977	203643	239458	289437	257259	227382	219543	252832	229724	214751	240358	219101	266749	268681	247331	214646	203530	220204	221898	258061	199725	240785	259708	260495	240537	243439	212134	211623	238644	227585	243268	244286	237174	224374	240443	252350
11.73_635.6003m/z	101806	91497.8	90552.1	87419	80957.4	97777.8	92251.1	84953.2	90866.7	87293.5	84512.1	91211.3	86732	88127.4	83562.2	86647.4	99964	96690.5	93317	87158.3	82318.6	89809.2	86513.3	91872.7	92489	81672.1	86223.5	96089.4	88066.6	85308.9	98846	88741.3	98857.4	82788.1	92499.3	87829.1	86750.4	85722	88125.2	84193.5	89229.6	86461	84031.2	89350.9	88668.8	94247.8	91113.1	88263.5	95290.9
11.73_908.8643m/z	2.23179e+06	2.07083e+06	1.96497e+06	1.84129e+06	2.05556e+06	2.09512e+06	2.10807e+06	2.10766e+06	2.14257e+06	2.00326e+06	1.97684e+06	2.19728e+06	2.10165e+06	2.02563e+06	1.98062e+06	2.05628e+06	2.06029e+06	2.05147e+06	2.20856e+06	1.89629e+06	1767122	1.87677e+06	1.89539e+06	2.0146e+06	1.95709e+06	2.05203e+06	1.98514e+06	1.8892e+06	1.81187e+06	1.76275e+06	2.18227e+06	2.02474e+06	2.16302e+06	1.95355e+06	1.97007e+06	2.03779e+06	2.19704e+06	1.96614e+06	2.07189e+06	2.01765e+06	2.09442e+06	1.85786e+06	2.02887e+06	2.01754e+06	2.1072e+06	2.11873e+06	2.0391e+06	2.08874e+06	1.99508e+06
11.74_1028.9534m/z	57833.3	65624.8	66196.7	49969.1	65542.6	61467.7	59190.6	66286.8	55884.7	90322.7	63406.9	61685.4	114351	69405.5	54632	79783.6	180323	65962.5	66635.2	77561.3	76976.9	83154.9	76788.5	79309.3	62925.4	71173.6	117828	78865.3	66966.3	86326.4	46927.3	66263.6	63860.1	67736.9	84804.2	59548.7	56975	111443	54956.1	62860.1	86140.1	78024.4	53734.3	49563.8	84780.8	79015.6	61082.6	55487	99222.9
11.74_670.5550m/z	42836.8	28397.7	39766.8	27367.7	35600.7	36585.4	32486.4	37395.4	39933.7	35178	29677.8	37961.2	33492.7	38736.4	35409.1	35046.6	36487.6	40050	32096.2	40719.4	35595.9	40651	29930.6	41334.5	36910.1	36521	27861.5	35296.3	36498.6	35153.1	34433.7	32947.5	38450.9	44106.4	35511.9	37685.8	37222	34733.1	38605.7	33372.6	36389.2	32942.5	36774.2	35446.3	30854.8	36055.5	37756	27605	40649.3
11.74_986.9113m/z	399964	400678	417305	407146	389006	480147	555408	387664	453366	514980	398368	390998	739793	354805	363812	464046	1.1267e+06	512134	456157	532392	569165	452601	439606	496598	546833	521156	704117	559261	411939	587852	396814	389379	383194	496559	612134	352763	400083	718517	439733	464052	542278	445598	389624	363858	442495	513432	408663	389487	611746
11.76_1012.9249m/z	80311.8	71124.6	81656	69275.9	55909.3	81360.7	79747.9	69313.7	99330.6	102895	96055.5	83537.2	120812	74115.3	71738	88284.9	101674	98154.7	79749.7	89082.8	94684.1	86463.8	104452	97819.1	115139	89873.1	116482	96237.5	77108.7	108802	77338.1	83262.5	65588.1	87127.8	83828	74358.7	84899.9	101273	103540	94689.9	102993	80347.6	83191.3	73742	83091.7	84907	66990.1	69743.5	103669
11.77_984.7419m/z	729941	748224	718316	657343	756273	778108	844516	714819	825378	796699	711444	749494	916442	724161	671532	740317	1.02231e+06	752368	734240	749471	712404	719020	676366	723689	735500	705928	839817	767535	693071	737438	769459	710735	751017	776221	808488	727464	767671	852072	749146	742132	793835	706927	687925	686219	731485	776057	666491	717816	796921
11.83_948.8960m/z	683556	613552	599162	552076	648659	644105	628719	654990	626798	625247	596163	664459	630946	610320	614125	628667	646695	616039	665368	586665	583132	590133	578385	617642	586613	609535	612048	631565	611256	611144	674671	623532	653880	586754	600270	624210	686230	616369	650813	635789	644104	562658	604808	593676	616777	600228	600270	617947	658636
11.84_951.9102n	783485	763404	653316	682492	729029	714918	758246	733516	746706	701696	708752	717065	802743	730845	724568	739399	806731	709769	727422	743976	720770	709847	702201	758198	742715	726810	700303	771770	683978	692955	730305	672692	747173	673953	729960	706916	766325	699845	750803	722695	742948	714772	702377	741705	730046	745353	679963	758733	762469
11.86_1000.9181m/z	111959	121822	108861	99071.7	113110	118851	109258	110527	117880	106076	113195	90773	120245	95886.7	103615	115681	126769	128786	127734	132092	120678	114947	129501	141359	119586	107497	104657	102092	86129.9	107475	131810	106637	100219	114357	110276	106826	110347	93812.7	110117	108682	111090	99048.6	107608	128474	123407	125018	115883	117551	122325
11.94_1030.9730m/z	180088	177925	151706	163634	157751	171138	178541	158215	155047	172933	183511	179642	201922	160409	169766	159601	213112	160556	183163	154493	164775	170728	158146	155372	178768	177686	194744	169797	144341	152901	187467	168196	191237	136613	182315	181067	167256	205399	188276	159310	183989	170701	159140	173293	150602	174081	148508	166553	183011
11.94_939.9215n	2.3873e+06	2.22371e+06	2.10386e+06	2.04717e+06	2.24585e+06	2.36253e+06	2.21332e+06	2.26172e+06	2.31863e+06	2.15852e+06	2.10373e+06	2.29658e+06	2.28833e+06	2.2402e+06	2.17451e+06	2.27179e+06	2.38671e+06	2.20256e+06	2.3332e+06	2.13671e+06	2.06919e+06	2.13553e+06	2.10732e+06	2.26035e+06	2.19603e+06	2.31261e+06	2.25503e+06	2.31251e+06	2.1192e+06	2.13919e+06	2.2675e+06	2.15652e+06	2.35945e+06	2.13248e+06	2.15944e+06	2.19109e+06	2.25524e+06	2.13281e+06	2.22264e+06	2.22102e+06	2.27785e+06	1.99902e+06	2.21053e+06	2.19343e+06	2.26486e+06	2.27989e+06	2.04499e+06	2.24265e+06	2.15005e+06
11.94_965.9386n	760864	694460	708164	710785	750540	742179	740767	696129	765124	756985	719955	736121	900674	752976	649580	751460	1.06457e+06	759808	804364	752921	769617	714924	759303	744743	745343	786981	757211	801142	738069	816118	730449	725322	743453	671821	740479	661014	708660	844853	693472	732886	808353	704968	701690	719211	752699	801918	651000	781370	793764
11.96_1014.9415m/z	179338	170351	175894	176422	154517	168810	174982	190083	199501	193051	167286	183655	228903	181556	163604	182248	183638	171165	187351	173281	203352	170506	168234	190619	180744	195300	202209	198508	178544	176293	177388	177496	179370	161365	182769	194376	217604	210187	169181	181650	203991	175920	145839	149859	195736	185885	166752	173157	173842
12.00_827.7963m/z	244372	231305	219144	228979	247979	256082	234650	231982	256880	217183	221897	242789	214243	248192	248599	241144	241007	236857	263242	238423	220595	238606	237560	224745	220161	223694	215056	224121	211303	221097	226285	216853	238467	214932	231395	244696	233781	203279	227178	240177	218402	217097	235700	224831	256245	240981	248659	235213	235689
12.03_1035.9786n	3.23723e+06	3.20155e+06	2.93369e+06	2.83119e+06	3.11585e+06	3.07377e+06	3.06555e+06	2.98798e+06	3.12233e+06	2.89043e+06	2.88309e+06	3.16589e+06	3.03995e+06	3.07858e+06	2.97507e+06	3.05184e+06	3.03135e+06	2.83824e+06	2.99083e+06	2.83014e+06	2.81834e+06	2.95314e+06	2.87512e+06	2.92526e+06	2.87265e+06	2.92442e+06	2.83732e+06	2.91045e+06	2.82964e+06	2.76047e+06	3.25245e+06	2.98473e+06	3.24719e+06	2.8968e+06	2.86568e+06	3.01128e+06	3.18345e+06	2.90429e+06	2.97323e+06	2.91553e+06	3.12569e+06	2.64422e+06	2.87261e+06	2.99688e+06	3.02692e+06	2.97811e+06	2.84437e+06	2.98061e+06	2.88317e+06
12.04_1002.9406m/z	150454	146319	130699	130897	161540	159314	161321	138673	179302	154191	144991	149497	135191	158183	139531	150695	144495	131759	139419	145853	128130	167484	115551	131398	134910	156352	124896	146064	130437	145390	164932	149502	146568	140040	154299	148207	146005	145174	146801	108834	156003	134598	117648	137277	137613	157253	148577	143602	137258
12.04_976.9268m/z	359232	342352	345009	328776	358514	340048	381307	388397	393931	331375	369764	379457	375185	389026	360152	363272	367613	332343	357351	353050	326137	353347	310527	338859	335586	334638	294399	331656	340563	340948	361860	365124	321439	337179	326262	360897	376207	352088	357919	382688	404303	333056	307158	357886	319649	331735	310506	328507	323546
12.08_195.0909m/z	20250.7	17960.5	22121.7	20938.3	21226.7	19495.9	25847.4	21663.4	25051.2	20697.8	20737.4	27356.2	21786.9	23725	25378.9	20639.9	22314.8	18837.1	26942.6	22354.6	22237.1	25228.9	28588.5	24241.1	22557.6	25048	22500.2	23755.5	18727.3	22588.4	19332.8	27798.1	19697.7	16795.5	23365.9	22475.1	24943.4	20882.4	20775.1	24310.3	20550.1	20124.1	24320.9	22896.9	18076.8	28319.5	24962.6	23189.8	18833.8
12.09_656.4979m/z	32696.8	15158	26463.9	20431.7	23186.2	27108.8	23473.1	26271	25778.5	24765	25875	26811.5	26577.3	33063.3	21492.9	26587.9	28750.7	24006.8	32091.3	29275.9	28387.4	26464.1	30107.1	23117.6	30123.5	31881.8	29701.5	26459	28985	27549.8	25056.7	21414.5	27025.7	26708.4	24808.3	33038	23342.7	23184	26226.9	23497.6	27320.2	20297.5	26926	27504.8	26547.2	31313.7	25955.7	28564	24652.4
12.11_646.4795m/z	55846.1	55607.9	64034.2	41819	66302.7	65644.5	70245.7	64139.9	54583	44491.8	52714.3	63049.3	49452.1	63769.2	51365.6	50420.1	48365.5	50011.6	38130.9	48237.9	53454	50600	57802.6	44831.4	31525.7	51523	46034.9	48146.9	33732.6	54968.6	50419.9	52706.1	74866.3	52503.1	46784.5	64448.5	73713.4	56153.9	47193.7	59246.8	55638.1	44173.9	42996.1	60874.7	48172.7	63407.3	53244.7	56141.7	46894.3
12.14_1016.9589m/z	216506	218577	232421	198203	188318	213255	222647	237951	224051	205974	178702	213331	247203	204141	228388	226659	230422	203346	250251	222596	183636	221837	207000	228742	188005	219064	229109	190834	225988	197091	216480	197373	238140	206876	180184	213314	219697	224852	205942	185490	223797	204793	197116	233399	218145	236149	199646	238199	222107
12.14_967.9520n	550709	525212	509649	505989	555070	548878	565563	527378	596083	487031	523601	589988	564007	564987	542932	581913	559607	516714	560473	523054	536949	556934	564604	564465	535442	570671	516496	556498	463831	484911	564689	502836	601599	513136	524425	552968	514919	544446	529307	543279	538446	531587	535922	572913	556334	525671	551761	533947	558982
12.15_965.9311m/z	338536	285999	283489	263587	282647	301217	269629	289658	283990	267223	281605	304243	278588	272364	307032	287377	297826	294284	326073	297048	298044	309285	293628	309313	300316	305528	283752	280313	269424	275960	310590	296873	304054	282318	275666	281105	280439	258649	269241	284334	307689	269683	278387	285293	301358	293325	298969	302475	292960
12.17_610.4275n	23935.3	32367.8	19664.5	20641.9	21752.9	22682.1	23969.9	23316.8	30126.3	23236.5	21817.8	28782.5	31797.6	25179.4	24859.5	25513.8	22745.6	26710	24256.6	32731.4	30670.6	22139.7	20169.4	25952.4	28516.6	30829.3	29329.8	23067.5	27456	25463.8	32703.4	17271.1	26563.3	23581.2	22666.5	24519.8	25709.4	18897.3	22390.4	24835.7	22745.1	22283.5	23646.5	27492.2	26350.7	22183.4	36069.5	26767	23612.4
12.19_656.4961m/z	50819.3	51670.6	44146.4	36272.6	43422.8	51071.9	39550.2	44503.2	54356.8	43944.5	45157.9	51651.8	53356.8	48726.5	42725.5	43751.4	48037.1	47833	44118.5	48899.7	50079.4	49405.9	46069	47650.9	43561.2	47697.2	49023.8	44521.5	42630.4	41370.7	49515.6	36639	45694.3	40969.2	43194.4	41382.6	43638.4	43929.4	48344.4	44705	47611	42390.6	45201.9	47411.8	45679.6	44406.4	48750.1	47630	52757.7
12.24_466.2665m/z	39762.5	39402.5	32951.8	37852.9	41422.3	37306.3	42621.2	40415.8	38023.3	38484.1	39520.3	44627.5	42781.7	35677.5	33643.1	37203.9	37708	35717.2	40227.2	37464.6	32535.6	34777.1	29443.5	41355.1	36331.8	36476.4	35701.6	40841.2	38475.1	38514.4	43425.4	39889.2	36868.2	37297.4	37357	35682.9	36710.9	37280.8	35965.6	37332.4	36956.9	38242.3	34612.9	37213.3	37373.8	43408.8	41475.8	36920	41399.3
12.27_869.8444m/z	453295	409744	357254	361678	399102	408685	387148	390423	376488	352841	395424	397700	404789	408079	395054	429528	431349	410478	409904	373221	325184	377655	344043	390021	390954	382394	376220	380466	391401	382062	415076	414984	423317	351224	379189	372066	385363	377709	398509	388900	432886	382791	394506	410181	413903	398152	370666	392101	352147
12.33_1044.9874m/z	79451.8	83170.2	80312.5	76951.9	82970.4	77301.1	82784.2	82456.8	82925.2	87326.1	93743.7	100712	75899.8	100387	100318	94747.6	94381.2	87331.7	92372.8	73837.9	87236.9	93395.8	82249.3	91900.4	75200.9	82177.9	67649.4	92017.4	81481.9	74864.2	67581.9	59464.9	71908.2	78618.2	91647.4	78667.8	56750.1	94191.1	91265.4	97609.7	111093	101132	79345.3	111056	110547	83004.5	88998.4	116155	80145.3
12.35_992.9574m/z	434398	419487	361209	358953	441666	411330	402706	420708	398816	382738	366397	437398	402847	401473	419052	389743	406119	375050	443145	364140	363965	376242	393128	400752	373089	395566	363285	383100	365094	338093	408233	388176	437384	366755	394852	363522	410356	390095	392125	367892	406231	396369	387247	409535	409477	396954	367385	381390	374137
12.45_628.4247n	37358.6	28916	38928.1	34074.4	39750.3	40141.5	31063.8	30204.7	36478.6	26549.9	30975.2	35037.9	45127.7	42769.8	41619.5	37685.7	45764.1	37600.5	35589.6	23206.3	40138.4	41594.1	48877.5	60761.2	77748.3	58109	40115.6	27739.4	15802.1	19758	37082.9	34946.9	40353.3	29123.6	22428.1	29135.7	23554.3	22558.7	24457.9	35370.7	28190.3	37738.4	29543.1	41630.4	49439	40773.4	41829.9	48906.5	34753.2
12.52_897.8807m/z	595158	511107	474201	441678	480154	499855	505655	484824	519398	447746	483940	524504	487012	510245	485259	495196	482334	474711	459761	456481	455851	471755	490836	474929	457431	501621	509276	480675	459150	468760	558045	517167	518735	486470	461755	480717	500113	446949	532411	500341	491079	425696	495244	474443	481371	486645	414732	463784	433145
12.55_989.8355m/z	9045.16	23275.3	26339.8	23080.8	16221.5	16819.6	13475.3	10406.8	13122.2	18356.5	14810.6	15657.1	25873.4	12677.2	16660.7	16040.7	13053.3	14490.3	10283.9	14374.1	16555	13524.2	12386.1	17323.5	16639.2	20678.6	10929.3	11685.8	16882.7	14684.4	22351.9	18906.3	18072.7	15453	11682.2	14234.1	15615.5	15460.4	16108.1	16831	15034.6	14402.8	14808.9	13321.7	11807	23329.2	21010.4	8441.45	12043.8
12.64_191.0696m/z	16824.5	15278.1	14833	11169.5	15379.9	15075.9	10549.7	13639.5	14380.5	13366.9	10502	10705.5	15080.9	14396.1	13705.3	12691.1	15537.4	12693.9	13933.8	12212.6	12298.2	13054.1	12797.6	13377.7	14228.8	13964.2	12286.3	13882.4	12879.1	13317.8	15602.1	15795.3	10098.8	13517.6	13651.5	14032.9	15083.9	11616.5	14468	13871.7	13667.1	11831.8	11373.2	16136.3	13040.7	12216.1	11062.7	13620.6	13053
12.81_638.4227m/z	18472.7	13623.2	17358.3	16528.9	17321.6	14041.9	18655.1	15530.5	20865.1	12625.7	9703.86	17086.4	13615.4	15523.4	15625.9	16204.7	18058	17713.6	19192	20200.5	15628.6	20883.7	18780.6	18333.1	16217	17209.2	16776.1	15650.3	10574.1	14151.8	16079.7	16930.3	17447.4	14365.3	15126.7	17366.6	18532.7	17388.5	13613.3	13986.9	15353.4	13584.4	19007	16097.4	12050.1	15020.9	19170.8	19763.8	16697
13.01_195.2579m/z	2.01051e+06	2.00731e+06	1.84818e+06	1.76595e+06	1.91024e+06	1.84244e+06	1.75916e+06	1.80621e+06	2.11803e+06	1.7625e+06	1.8119e+06	2.17052e+06	2.07315e+06	2.15641e+06	1.99674e+06	1.7553e+06	1.7058e+06	1.70775e+06	1.4186e+06	1.66068e+06	1.775e+06	1.96384e+06	1.82139e+06	1.70755e+06	1.72387e+06	1.71531e+06	1.71563e+06	1.89377e+06	1.90693e+06	1.94257e+06	1.9975e+06	1.95503e+06	1.96955e+06	1.6871e+06	1.81744e+06	1.83163e+06	2.08396e+06	1.77935e+06	1.90419e+06	2.07952e+06	2.06313e+06	1820063	1.81866e+06	1.72658e+06	1.73717e+06	1.78127e+06	1.40703e+06	1.60886e+06	1.60781e+06
13.48_207.0993m/z	390726	406945	381977	350466	398352	394560	380516	388065	394316	355584	351468	373514	385632	392338	373908	387792	381306	384591	388341	371598	355508	378955	357401	368880	369779	370232	361549	381913	354900	357196	399189	377744	417939	367292	376446	387456	379170	351157	379492	372184	385138	363457	385039	381483	384804	394252	393489	384374	372528
13.53_611.4255m/z	37853.6	30059.5	34775.4	32673.6	36315.6	39739.8	30084.8	29816.5	34896.1	31594.5	30372.1	36858.2	34715.6	33314.6	30056.1	31155.8	34363.8	33067.6	32768.9	28267.9	34517.6	35459.6	33239.3	32238.7	30075.4	36786	32306.1	28403.9	29460.5	31167.8	31005.3	28431.6	28345.9	33895.1	30133.4	31332.1	31967.5	32743	34918.2	34099.3	42252	31041.8	30478.2	32942.1	34249.6	38258.1	35235.2	35400.7	34767.4
13.61_201.1121m/z	149339	146420	153084	134400	154987	151032	155034	154933	152744	147797	145186	173207	151119	138391	140480	137145	131680	135826	143606	139228	134307	136354	137124	139858	138731	141499	140710	131323	136231	132170	146695	144035	162618	149149	148269	143194	146598	149772	167795	134329	167399	130644	140548	139449	139435	143434	143561	143582	140005
13.66_237.3275m/z	788070	783715	724422	666733	787700	724027	684677	696770	728209	691728	671247	762357	708139	703989	677648	634065	647233	661448	486477	568580	594189	692488	648486	620894	652874	680626	682904	686977	632211	643804	782258	741477	770550	644201	675556	697579	691701	685635	738992	679402	701101	616333	659269	649646	656177	695995	499410	585437	533581
13.69_681.4289m/z	42124.7	33185.2	37081.7	43513.1	31891.1	42551.5	40352.3	32082.3	38274	28572	35640.2	39916.8	34569.1	43417.7	40519.7	34620.3	31937.7	43830.3	46696.9	29470	40284.3	37121.5	34490.8	24555.6	33694.2	34519.8	25584.3	33064.1	46928.6	27113.6	23023.7	24226.2	34725.9	39388.9	40652.6	25235.9	33925.2	32276.2	48818.8	38240	36218.3	35373.7	37595.3	40081.2	29761.9	34377.4	44709.9	37595.7	43069.6
13.69_784.4920m/z	18528.5	10805.6	16114.9	9876.32	15990.5	16451.5	14102.5	18023.8	15899.2	13654.9	14783.3	14891.2	17193.2	20648.5	15250.2	20872.5	16073.2	13438.2	15135.3	21149.4	10669.5	19225.2	12432.8	14798.2	9674.14	7978.31	12152.6	10445.1	10018	8644.28	14869.3	11173.5	9056.71	13725.3	15326.6	16039	16854.2	14505	16888	13707.3	22150.4	20041.8	14483.5	11027.8	16094.8	20172.5	14661.1	17323.7	11508.8
13.69_805.5058m/z	23516.7	32282.8	24800.3	23747.8	30181.2	14477.8	19543	33262.1	21850.2	8397.04	15371.3	31150	42432.2	37994.1	16897.6	29801.1	20938.1	13859.3	16927.9	35536.5	26040.4	34911.8	33344.6	30764.6	34084	25237.8	15465.1	24382	17802.5	22712.1	14538.7	16768.6	26976.9	19128.6	25111.3	31065.6	21049.9	25844.3	23076.5	26988.8	23609.3	19335.5	39575.4	21469	36214.3	34447.8	18713.5	22835.7	10265.8
13.70_618.5374m/z	10290.6	11406.2	13178.5	10234.8	15590.9	22041.3	15911.9	13265.9	15896	9967.66	11731.5	15173.6	22521	19738.6	16963.6	17883.5	13122.6	16687.4	16955.8	25286.1	24357.6	19808.5	14662.5	11070.1	11786.2	11392.7	10902.2	23009.7	26336.4	14447.4	11324.9	12836.9	12336.7	15490	15601.6	18473.1	14621	15743.8	23662.2	11847.2	19328.1	22654.3	11006	13731.5	12002.3	9661.04	15130.5	15381.7	12343.1
13.71_496.3253m/z	240523	251911	244750	225742	251967	239680	215689	225989	256284	240169	245671	247732	232036	225895	239460	231583	227366	225073	223067	226869	222341	242836	231943	220445	212133	232825	234617	206494	226168	218203	254686	240059	241003	221393	219266	231478	250096	250515	246243	208923	244171	229986	239665	246620	233050	232734	224197	227292	228345
13.71_607.0613m/z	8119.54	14891.2	298505	462535	724095	701612	124831	23373.4	3874.22	5616.64	8001.59	6285.42	5060.02	6836.06	7637.18	6077.32	8603.2	11429.2	4124.39	3063.86	1227.25	2335.27	6720.22	6542.97	2411.04	7533.84	2006.81	3137.9	3206.01	3678.44	14158.9	76420.8	1.42326e+06	421833	76132.8	6937.19	1428	6053.72	8899.73	4004.37	8792.49	19743.6	5827.53	7776.71	10681.3	8947.01	19296.7	7337.33	8508.8
13.71_786.6019m/z	80880.4	108819	133563	147236	143031	108851	60146.8	99575.4	105266	119983	113881	111017	120423	154451	120236	120954	80785	80721.3	58590.5	190688	63828.3	80608.2	62235.3	53889.6	57033.7	46961.1	134280	177037	259955	385187	131011	128330	78145.3	93234.5	84623.9	95010.9	117900	182277	104152	189298	139185	162462	115186	118271	57605.7	72174.4	64684.2	65651.5	50257.5
13.72_362.9260m/z	8782.25	6310.36	4787.65	8137.45	5397.26	6118.69	7714.7	6407.23	11095	7138.48	4328.48	9349.62	12004.5	5570.78	4834.49	3583.17	6479.92	4501.19	4890.21	6532.28	4458.72	7438.03	3994.1	4360.31	3892.76	5373.43	6643.63	6610.67	13991.4	7246.51	11488.2	6739.87	5446.47	8297.66	9047.1	10142.5	6536.62	5503.01	9602.41	5018.53	7691.48	5288.13	6021.76	4530.22	5867.2	10139.6	8729.69	4100.41	4253.03
13.72_430.9138m/z	7104.89	7869.98	8903.19	9398.87	4581.88	6763.64	3442	6534.87	6264.88	2396.84	4276.05	8236.45	7483.28	7955.85	6848.91	6794.8	5482.44	4963.14	6999.93	6571.51	6819.77	1654.69	7859.85	4976.53	19461.1	42463.7	25526	21363.5	14523.8	15842.6	5395.52	3130.81	7107.72	5978.38	6109.89	5942.21	3143.61	7441.83	9016.89	3114.1	3802.61	8000.5	10038.8	8107.13	6110.45	5277.36	5944.7	7398.1	5968.08
13.72_583.2156m/z	32332.9	33311.2	30528.8	20261.4	41387.4	37186.1	23626.1	14890.7	35534.3	29095	24517.9	34798	34426.2	21778.5	30010.9	9903.92	20669.3	15478.1	23507.8	17624.9	21318.2	23732.6	21003.2	14140	11105.7	23011.8	21029.4	20246.5	24387.7	19602.3	27894.3	23914.9	48177.5	21675.7	28636.9	34728.5	25136.5	32489.6	23741.8	28730.6	28148.7	31737.7	15456.7	18770.3	21893.9	19318.1	25513.3	19826.3	17316
13.73_197.0781m/z	48708.9	54732	53504.6	46657.1	51199.7	54362.5	48025.8	56230.5	51204	48021.8	45161.3	50820.5	46130	53497.1	45709.3	46314.9	49692.8	47432.5	48768.9	54606.3	56023.5	54280.6	54402.4	50720.1	47347.2	55111.7	48968.1	49495.3	48230.6	47760.3	48006.2	48800.7	56701.7	56840.3	48330.8	45789.1	47059.9	42733.4	42031	46956.9	47450.8	47548.5	48827.4	45835.3	49905.6	46274.3	51092.2	50749.8	52449
13.73_317.1151m/z	51549.2	57920.4	47567.7	40398.3	54585.1	53136.2	49361.9	55590	47855	48536	54465.3	53361.3	48187.7	53201.4	47707.8	47929.7	50463.5	46334.8	45363.6	53515.3	47624.9	43627.6	42496.8	45540.7	51647.1	44321.4	42586.5	42035	44716.3	42374.4	50771.3	51095.9	53477.8	47703.8	52958.1	55048	50037.6	49353.3	51842.1	55306.6	46885.2	44787.9	46165.7	51097.3	48022.2	47089.9	45914.5	50191.8	49399.1
13.77_170.0657m/z	162100	167610	157506	148255	162773	157390	158837	156430	159198	147920	152017	164249	152557	156995	146594	157138	156824	145605	153660	140764	138556	152694	139712	150421	144643	144080	138375	141607	138597	130417	163886	159221	169400	158229	161721	151746	153423	143903	156940	148559	155697	140933	147418	139954	146466	149107	140889	147110	149754
13.94_151.0339m/z	46393.9	42568.7	41753.5	38072.4	41061.3	40185.4	37844	41780.1	45597.8	42545.8	35547.6	35784.9	36588.1	38088.3	39429.4	37727.5	38510.3	40479.1	38559.7	35513.4	36514.9	41383.9	42500.1	40728.4	40301.2	35245.3	36607.9	35515.9	39456.4	34101.9	42094.6	44620.7	48831.8	42031.3	37769.9	40637.7	37890.4	34412.8	39497.5	37658.9	38067.9	37817.7	38364.9	39353.2	40672.5	37352.8	39121.3	37561	35145.6
2.04_510.3925m/z	339671	289315	465720	688012	423335	371167	358407	567725	445374	421074	370785	316894	379261	262134	314279	407978	312705	545960	333203	384709	441419	353326	384567	349040	225614	284034	318357	409113	377500	455240	296162	356794	302632	293111	274959	328385	292012	524701	315838	397939	549959	392985	357663	335364	441653	295324	282780	559922	309632
2.05_467.2814m/z	107224	104344	111455	109873	111682	118640	111001	115382	127921	120747	170079	245229	121397	300862	303079	223931	200028	146698	292386	258182	129919	223955	230519	178697	210445	133939	284413	242274	182656	145548	99058.6	107685	118103	123306	119391	116754	120614	208688	135603	229424	222335	226664	158499	278348	228215	247944	133345	114162	122444
2.06_538.3878m/z	138777	167717	236134	310280	159631	199697	217729	207395	142558	233890	213955	167803	234783	145218	159527	179495	141978	192421	132668	214047	218768	194254	191259	147875	155293	121182	166098	183433	198027	255147	139724	182434	143774	219202	189532	165129	125545	191370	161616	235063	227244	147315	225526	180266	183927	175378	138144	188824	164997
2.10_405.4204m/z	22563.4	21876.6	21459.6	21357.6	26291.4	25177.3	50063.1	40196.1	48449.4	24675.6	40449.8	64972.1	30463.7	70640.8	63163.6	63502.3	84827.6	37004.6	86847.9	57469.6	43307.8	63204.6	58497.3	58076.9	51279.5	47215.2	65222.7	85755.7	72858.8	28255.2	27466	32989.7	39725	21047.8	25313.1	29515.4	35000.7	37139.9	36140.7	75158.6	57257.7	40958.9	39607.2	58529.7	81716.5	71224.1	56420.6	21830	41868.7
2.10_466.3310m/z	58602.6	69917.2	79259.5	114496	68097.1	87311.8	66738.8	86050.7	64083.7	87340.7	71263.3	61504.4	72983	59117.4	68879.2	66908.4	72704	90139.9	67028.4	77259.3	76477.6	69871	71539.2	59259.4	54125.2	47808.2	64072.5	70553.6	65856.7	90564.8	66589.8	64835.6	65412.3	67019.9	59379	67372.2	61613.8	79169.4	64642.7	77178.9	79284.1	66943.3	72809.5	72780.6	85772.8	72504	53170.5	128277	61198.9
2.14_990.4696m/z	105285	74143.1	125821	158622	88294.1	139543	124090	129133	102917	88643.3	79376.3	80354.9	97765.7	140428	115260	107228	103124	95647	91624.3	102699	133822	121797	113817	126140	121017	114522	137620	96485.7	100379	74429.3	86597.5	122608	125730	140784	100426	117518	105572	99644.5	90464.1	88475.7	111453	134920	123425	108885	111892	80277.8	97069.3	91169	145502
2.15_506.3420m/z	93722.4	92302.6	75884.7	84065.3	92842.9	89927.6	82847.7	92895.5	67773.9	85248.8	75691.5	88764.6	82567.7	84118.3	85661.4	88513.3	80194.2	100987	107988	83275.5	87847	83337.8	85031.7	99886.4	101689	83190.2	97184.1	97278.5	91226.6	74943.7	87592.1	95674.9	73298.7	90981.9	70683.1	82536.1	82316.6	77470.5	88117.3	89817.6	91404.5	93075.4	95969.7	84150.5	84858	93125.2	100111	76047	78449.1
2.15_586.4093m/z	33169.8	28875.5	25337.3	25564.9	29144.3	34842.4	49002.9	50337.5	46330.1	38255.7	57114.1	78781.3	24891.8	84308.5	93211.5	66467.4	76481.4	53395.9	93151.8	91133.9	44583.7	80877.8	77805	58882	79607.1	37447	72783.4	60500.9	41308.8	26674.6	31866.2	39343.2	24694	40012	44978.1	50774.1	44551.1	69365.5	44691.9	66785.5	56713.9	83956.7	45639.6	84456.3	88796.7	102100	40613.9	34398.8	27678.3
2.24_562.4214m/z	53417.7	29856.1	48714.4	82485.5	64066.8	43794.1	57738.6	88336.7	53168.7	45702.1	45479.7	46699.6	56055.8	36495	39508.2	57163.1	33544	60380	42671.1	42453.1	43388.1	59404.8	40990	50551.9	35471.7	43206.4	33351.5	51463.1	45557.4	58910.1	39708.6	47575.6	52625.3	58618.4	34676.1	34999.7	37761.1	45970.3	46781	48695.9	73699.1	49065.1	39309.6	41968.1	63025.2	37061.1	30980.2	52080	38662.9
2.26_506.3419m/z	173370	140816	152338	152124	164799	160206	156873	184437	147609	179415	160232	142990	154707	157528	145205	146252	135322	155301	219148	185878	207621	183228	173261	195640	167560	175891	168522	171024	156698	157177	171450	180068	140040	154061	143821	145522	151412	157079	177385	160012	153545	156162	148559	113432	147594	149258	161602	162230	149240
2.36_528.3403m/z	68785.6	65415.4	56282	59477.6	79000.6	80000.3	82082.4	90760.7	90938.3	79359.8	144309	223263	74739.5	235483	245147	183274	188375	97856.8	227543	207499	98446.7	217253	202381	127192	172607	84895.3	199995	195791	155394	81961.2	64710.5	85526.4	72757.5	63032	81505.5	75175.6	91641.1	150478	88143.6	182365	178230	178649	118387	241245	232623	194677	80850.9	65616.8	66549.8
2.38_586.4096m/z	109518	100709	91278.2	103896	103742	121929	118662	125966	127369	130163	190938	266775	103793	315912	324587	224030	236354	156762	297373	280463	142565	250433	252603	171281	218751	122433	230841	271327	188180	115738	104255	111510	100587	99053.9	107375	116839	121509	202463	126280	241175	225370	237084	147661	282251	276218	266409	115241	110578	114685
2.45_316.3090m/z	21765.9	13986.6	11723.1	14520.8	13253.8	13990.8	9108.48	6960.28	12733.1	13957.9	12478.9	15036.2	10053.3	10935.1	11977.1	10563.1	12105	10668	11211.6	8249.09	14173.3	7778.87	7970.91	9049.4	6559.91	5465.84	2903.17	6754.66	7957.99	9607.94	11613.1	7225.8	11704	7495.14	14933.9	9226.64	9931.74	7432.67	11734.9	10649.8	12413.5	8532.08	10168.4	13114.7	13461.3	12069	10991.2	15613.4	9252.76
2.47_513.4368n	214667	262203	345639	472053	383393	332157	331333	280552	304532	362699	294004	311576	567305	197333	244997	366726	203675	419955	264757	341163	339812	276591	282623	276233	280260	284794	311029	336138	273798	401875	243864	327440	248036	342975	285188	205367	196356	370471	252096	393518	389951	254041	286807	308154	320951	377437	212172	231087	259043
2.49_572.3745m/z	1391.96	699.112	757.067	2840.43	1180.15	4898.38	4431.14	5382.83	3487.17	3914.72	2646.16	3615.75	1773.27	5841.13	7487.55	7548.47	4217.06	1898.49	6925.09	22673	6035.76	13537.1	5675.38	4464.52	41253.2	413349	7.71063e+06	3.22425e+06	177401	12139.2	903.297	1020.67	2512.12	865.398	7744.37	4619.72	3947.99	2065.67	2370.43	3026.29	4955.74	4937.43	5049.43	5611.69	5943.28	3874.04	6635.13	5110.07	6598.75
2.51_326.3783m/z	861691	1.07417e+06	791918	880903	946899	1.25513e+06	1.06404e+06	1.04468e+06	1.20552e+06	1.06725e+06	1.72574e+06	2.23346e+06	1.1783e+06	2.62725e+06	3.35192e+06	2.59156e+06	2.38367e+06	1.44853e+06	2.49622e+06	2.83412e+06	1.3622e+06	2.24496e+06	2.40466e+06	2.05314e+06	2.50768e+06	1.47915e+06	2.90217e+06	2.77588e+06	2.42522e+06	1.60045e+06	787532	1.10345e+06	1.15371e+06	1.24635e+06	1.45839e+06	1.04051e+06	1.253e+06	1.9908e+06	1.30199e+06	1.87854e+06	2.19614e+06	2.08884e+06	1.31578e+06	2.54109e+06	2.16026e+06	2.6426e+06	1.54315e+06	998849	1.26994e+06
2.58_321.3257m/z	67085	67818.3	50866.5	55133.3	54669.9	81287.4	76680.6	87229.1	98674.6	77990.5	129831	186494	85040.4	225993	262163	176991	159006	108735	186181	272003	123499	226793	258178	159369	188652	114692	181750	204910	206173	126205	55126.8	63925	73988.1	72316.1	80355.9	80104.1	95015.2	139845	95643.2	142783	151388	173667	103629	194390	161625	191074	117493	78134.8	106428
2.59_283.2877n	311028	247646	238775	294004	216563	494445	196440	588637	291563	767313	269823	280160	1.13289e+06	662591	782814	600663	612367	459376	920148	1.23382e+06	1.29177e+06	800453	2.07224e+06	1.23334e+06	1.91546e+06	1.41126e+06	1.03978e+06	1.27581e+06	1.20323e+06	1.50743e+06	344953	182704	263927	380012	163148	424374	761015	303337	593084	285142	833380	421159	870107	422633	714384	462251	474439	456177	1.25191e+06
2.59_567.5831m/z	184.961	28810.4	30596.6	2780.95	39115.9	4421.82	1423.6	9200.69	38407.2	34197.7	645.863	467.684	132702	12914.2	65912.8	8874.14	18940	2268.12	64712.6	136251	195096	56431.2	298544	120580	200354	138107	113227	133003	194681	210897	35150.4	30299.8	37491.2	41712.7	40218.8	988.482	22940.4	1729.42	21800.6	39823.9	61772.5	1334	75955.7	13649	44464.3	7459.07	7220.11	4251.23	154664
2.70_558.4367m/z	2.07074e+06	1.89279e+06	1.67833e+06	2.0131e+06	1.98662e+06	2.41687e+06	2.4209e+06	2.19034e+06	2.86672e+06	2.31026e+06	3.6642e+06	6.38907e+06	2.06659e+06	7.85394e+06	8.51985e+06	5.00719e+06	5.4679e+06	2.89123e+06	7.4831e+06	6.2455e+06	2.57261e+06	5.8556e+06	6.02824e+06	3.92044e+06	5.33597e+06	2.48676e+06	6.26521e+06	6.33942e+06	5.03672e+06	2.67944e+06	1.97813e+06	2.30027e+06	2.0468e+06	2.14322e+06	2.40031e+06	2.15459e+06	2.12443e+06	4.50813e+06	2.59306e+06	5.15059e+06	5.15762e+06	5.66899e+06	2.80415e+06	7.43008e+06	6.80374e+06	6.71431e+06	2.88739e+06	2.04451e+06	2.33153e+06
2.70_746.6757m/z	3.03974e+06	2.49417e+06	2.426e+06	2.17236e+06	2.94744e+06	3.00137e+06	2.46954e+06	2.77934e+06	2.79918e+06	2.63382e+06	2.55076e+06	2.99244e+06	2.78915e+06	2.41768e+06	2.11973e+06	2.74087e+06	2.4832e+06	2.71401e+06	3.18332e+06	2.9268e+06	2.88583e+06	2.72007e+06	2.52294e+06	3.08835e+06	2.60886e+06	2.74825e+06	2.58719e+06	2.67583e+06	2.3402e+06	2.66494e+06	2.96165e+06	3.09592e+06	2.78037e+06	2.33828e+06	2.46492e+06	2.59873e+06	2.56596e+06	2.30978e+06	2.45558e+06	2.30932e+06	2.60382e+06	2.3336e+06	2.31086e+06	2.24395e+06	2.71487e+06	2.51946e+06	2.87141e+06	3.20266e+06	2.72986e+06
2.71_739.5749m/z	106473	86490.6	92589.3	93777.5	102709	109343	91660.8	81708.7	111850	92459	87497.9	107035	98777.3	81247.1	80467.8	106429	93398.7	99626.1	97995.9	94709.1	103525	82676.7	89036.7	94443.7	78719.6	84825.1	75177.8	74913.7	79231.4	79891.7	101861	122506	123561	78525.7	88318.1	81522.6	92320.2	76915.8	72031.9	86366.8	85961	82028.8	88389.5	86198	105218	95162.2	104476	95663.5	86284.7
2.71_745.6573m/z	303643	245429	250152	234297	297495	334901	241287	273412	298479	268406	251467	317436	270903	243808	219772	276334	265658	301915	265291	324539	324600	275979	261745	385654	294868	301084	280151	262368	247036	277283	317633	354157	294769	228837	239594	269760	250272	242961	210811	227036	248258	237185	238682	229889	278490	303453	308705	303423	271360
2.73_298.3108m/z	3.59878e+06	3.5568e+06	3.36688e+06	3.61231e+06	3.65025e+06	4.71049e+06	4.44379e+06	4.4492e+06	5.46963e+06	4.71519e+06	7.248e+06	9.5944e+06	4.29776e+06	1.09966e+07	1.38351e+07	9.81808e+06	9.85926e+06	6.67341e+06	15659599	1.23478e+07	6.79235e+06	1.1701e+07	1.16696e+07	9.7137e+06	1.26604e+07	8.13536e+06	1.48723e+07	1.34362e+07	4.17414e+06	7.13187e+06	3.63053e+06	4.45791e+06	4.00887e+06	5.10415e+06	5.43108e+06	3.80578e+06	4.23141e+06	8.22566e+06	4.95564e+06	8.61946e+06	8.44294e+06	8.98773e+06	5.75453e+06	1.20399e+07	1.0341e+07	8.93435e+06	7.8546e+06	5.12974e+06	4.44168e+06
2.73_725.6883m/z	90875	73833.7	67550.3	64856.6	88084.9	96550.4	78451.2	99525.7	91658.4	88201.6	86197.1	105603	98813.7	70771.9	60098.2	89934.3	77989.7	85187.6	81142.1	80816.2	101628	77939.2	75529.7	103803	73269.6	79908.3	76611.1	87848.2	85605.3	69572.1	82407.8	87145	86191.9	73132.3	88575.5	81343.3	84902.1	71786.8	74828.2	55082.2	60012.3	77701.6	71528	79926.5	90291.4	80717.5	71848.3	84303.9	69128.4
2.73_739.7042m/z	177338	152840	152106	133388	177664	184415	148299	169276	170543	155089	146214	163960	172075	158525	161550	149676	158785	137342	164383	174327	166073	185276	149623	185311	169794	175230	139744	155032	121472	172107	145802	162746	157971	140038	159585	145894	156470	142908	144325	165749	157862	144333	145563	113605	154133	148894	149577	178601	174703
2.76_152.9883m/z	13912.1	17004.6	12500.9	11923.3	12903.7	10092.4	11975.3	11099.2	9976	10815.9	11351.1	11373.7	9198.36	11127.8	11878.6	9895.19	10412	8945.26	11472.7	12163.3	11605.2	9088.63	12092.5	13574.3	14726.7	11840.5	11414.3	10786	13325.6	14997.7	13684.5	9002.2	9924.8	11545.3	8330.32	12057	11629	12030.8	11240.5	9438.94	11535.5	10816.9	13746.5	11713	9442.6	12427.5	12542.6	13166.3	11901.2
2.77_906.4388m/z	62223.7	53612.9	62323.6	63544.9	50651.7	46232.3	61549.9	67270.5	38737.8	56009	39377.6	62536.8	46541.8	43233	53753.5	47896.2	55466.5	38621.8	36349.2	47584.4	44819.3	40233	45985.2	43217.2	56987.2	59138.3	30461.4	34416.8	52671.8	39238.3	50276.8	39716.2	36113.3	56908.1	40086.2	41367.4	45562.6	42985.4	61907.9	53168.7	54745.5	64074.6	59443.4	49339.8	51196.6	41322.1	45867.8	48680.6	51455.4
2.78_284.2944m/z	46575	47428.9	25872.7	43371.8	36620.3	44005.6	42743	32874	42066.5	38971	70024	65870.2	45797.6	119202	118284	76006.4	68982.1	61520.8	92923.7	98468.3	45684.5	74360.7	88311.6	74769.1	97363.6	73430.1	97451.6	96164.8	58188.3	50001.7	35377.9	43187.4	46721.8	33603.1	39129	41509.7	48106.4	60087.3	44564.5	73340.6	79339.7	76898.5	52565.2	92909	77003.5	92647.2	47869.3	46742.3	50359.1
2.82_381.3838m/z	8935.98	24243.8	15390.6	9528.96	5193.85	17810	21271.2	6815.29	19477.6	9736.05	27707.7	8784.63	18332.5	20957.5	25051.1	8402.55	10885	7461.59	27919.5	13650.6	15819.3	18140	12673.3	17033.5	14017.9	16856.1	9727.24	20172.1	12937.9	17119.7	8173.61	8075.23	24297.6	11862.6	28772.2	10164.3	20891.7	18908.8	10387	17353.1	18999.8	14943	24843.5	15225.2	9172.67	12327	6588.18	8859.22	17691.7
2.82_592.3318n	328569	319012	335734	310779	328775	332515	320723	308572	309143	304370	340083	308366	300997	345627	330220	305751	314964	359623	363744	335510	347173	319242	303241	352619	352553	334894	293900	332686	340119	304125	343985	362408	316587	315173	330115	334372	308058	335922	357123	307423	301351	330907	349810	266072	313345	341380	334639	313454	309543
2.87_538.4241m/z	103508	73834.9	134400	199154	193798	122973	111625	207385	156972	109515	122349	114802	161208	100593	114364	151624	113004	182661	137848	142525	119518	136835	126528	128963	83277.4	99738	126477	152635	134923	149321	101409	138118	115681	115281	93582.3	93483.6	82945	180902	114219	126894	156758	140988	107702	119052	148683	92884.7	99305	127114	104873
2.89_952.6161m/z	86039.2	87193.8	97392.5	85371.9	61977.4	85871.6	56681.5	63815.8	53584.5	51190.5	31113.9	55718.5	46563.6	57717.2	32326.4	61913.2	55557.7	55175.1	90243.8	39698.7	69364.1	57864.7	47817.2	28939.9	72504.8	48304.2	51347.1	35877.2	43061.6	48255.7	42774.3	61408.4	101227	37001.9	59316	65370.1	47303.5	35558.7	45850.6	58446.6	50867.4	47024.8	43996.2	47850.2	50692.4	54463.4	62358.6	73679.3	39104.1
2.96_587.4219m/z	50987.8	43226.8	42541.8	40591.8	43285	43603.1	41078.4	49688	44629.2	36482.5	43803.8	36971.1	41388.2	38940.6	44634.4	46645.2	34193.9	37004.3	50334	41768.3	41761.2	47860.8	41377.2	51116.4	44328.5	40044.8	39331.4	44769.4	45196.9	34882.3	50501.9	39914.6	46423.7	47549.5	40783.6	37077.4	39812.6	34988.4	34958.5	42054	42708.8	37661.3	31782.4	38778.9	39257.3	39817.4	36753.5	42745.8	34482.4
3.00_954.0007m/z	33253.3	5610.82	2027.96	6534.82	10233.1	22647.1	13221.5	7070.71	10880.6	9348.34	3215.52	1926.83	9423.01	13327.3	14718.1	26180	25860.1	7335.32	51721.5	17669	12787.6	21904.3	29186.7	9182.29	13796.9	30490	42678.7	6704.34	4275.34	4545.62	5746.17	7635.1	11993.7	6229.84	10768	18211.1	11030.7	3953.34	7163.3	3282.61	10084.9	11989.1	8636.82	24478.9	57576.1	28590.8	22881.8	22312.6	46999.1
3.03_282.3154m/z	57632	51647.9	48052.8	52623.1	55267.1	69513	68482.9	57251.5	75551.3	50537.5	114992	207141	55973	219825	266897	167404	164191	105121	199727	195234	92385	173826	191350	131547	150318	77201.5	200495	159658	146418	84859.9	46875.8	53305	53824.8	50580.1	77182.6	56030.2	71075.1	130660	76131.6	150326	130094	169812	92859.5	183707	190367	208891	88285.3	58539.5	79966.3
3.03_327.3135n	253549	219640	186616	205598	233191	267174	271517	220325	275983	245675	474184	765759	219634	858827	1.01257e+06	653074	658628	394147	777856	771249	315955	647414	714291	482570	635558	341081	721481	699501	514776	316511	222730	237444	206500	241639	277432	250762	291820	540032	294489	590212	557999	657445	372926	807923	694603	823065	362483	208068	270909
3.06_848.6227m/z	25642.9	33413.5	29136.7	16465.7	40883.9	24511.5	35300.6	27247.6	22799.5	21415.6	21038.5	31545	23955.7	27026.9	28348.3	30008.9	28465.1	25206.6	30831.3	27500.8	24426.5	24063.6	19425.2	13027.3	25916.5	36087.8	26083.5	29059.3	23842.5	21688.1	28883.4	22222.8	20456.4	27949.3	32807.5	27585.5	36090.7	29840.3	28993.7	37765.1	9085.03	30763.7	24566.3	13659.3	20155.5	25884.2	20861.1	35120.3	43134.8
3.10_355.3315m/z	30795.2	15902.7	19163.5	18780.1	22340.6	35344.7	29346.6	27740.3	33495.8	29579	46767.3	77902.8	36766	78088.1	105158	60405.2	49522.4	48556.8	80345.5	80939.1	31384.6	64294.1	75634.3	52416.3	64246.1	31130.4	84124.5	76630.1	47706.2	33798.5	29578.3	32591.4	28882.8	18386.7	28901.4	19574	31249.1	51998.6	29590.6	68883.3	60314.1	59102.5	34348.6	77132.1	78076.4	64423.4	35246.2	25058	28781.8
3.10_472.3109n	355926	259579	267134	273198	248135	281191	254953	230572	241060	235989	243058	237578	265440	194084	240244	218800	200242	237828	263329	212333	275806	257929	260988	220357	237515	246513	255973	220210	246720	281411	306609	268400	257141	239261	244782	234341	292396	221671	242818	237103	198099	214731	240127	208143	207944	265929	260096	263977	231587
3.10_518.3797m/z	149301	120708	128431	145155	141709	149978	132879	132801	128628	122985	125102	127942	138830	117256	127247	129988	103366	133341	140071	128326	128772	134685	123359	124748	138939	120710	136018	129713	125431	138849	148750	147904	143343	126849	139114	117561	143533	120094	127573	130534	122882	111333	123759	120825	115708	127012	128134	131046	124218
3.15_564.3402n	577992	593214	619594	590391	645914	627556	627622	551425	513291	606364	642976	601175	596844	577020	654207	575604	540113	699888	630281	618015	673858	613834	561142	638517	607169	567887	584139	636546	675535	623993	614542	626957	585262	580348	614639	576149	565464	569093	642862	621099	579229	656588	650781	531829	608632	643685	586614	582626	585200
3.15_587.3281m/z	46101.7	44961	43150.8	44235.5	48498.6	52343	49566.8	39058.6	36926.1	42722.7	47737.3	43217.4	47376.2	42578.4	46322.9	43243.7	39925.3	50419	42613.4	46705.1	49940.5	48203.2	44408.7	43111.5	47497.7	31394.5	50071.7	38450.1	55224.2	39139.3	43097.8	47417.5	46916.6	48127.7	42985.9	47077	44051.9	32188.5	47566.3	47213	42089.3	48892.8	44506.2	37486.8	42899.8	47265.3	46916.9	36511.3	36612.7
3.15_610.4075m/z	464440	537743	503776	508682	464745	581093	523129	509840	486993	564417	538254	521622	574162	551317	561549	555750	487473	669088	619594	604341	639589	615184	480873	587560	541499	504759	566193	600581	533300	524420	499002	574482	515703	675700	552587	536585	488028	479086	545081	521530	511141	573316	585028	494706	565241	559666	550980	528005	517063
3.15_623.3053m/z	135101	145257	149253	118487	160767	127719	143583	142607	132680	138001	126728	147378	141058	137164	125868	136604	124101	144558	138635	134328	115816	121122	126706	134080	126783	132330	116228	131553	104458	117952	142378	135157	136791	129158	131008	129614	140362	126836	129865	142946	136271	111124	135029	126732	134479	114391	148049	147675	118150
3.15_624.4197m/z	442918	476935	460856	461597	482879	500177	480182	470060	404123	476703	505688	477757	478614	505487	497276	460068	451113	547643	534229	508953	557722	506476	453571	534378	501267	472586	496991	506814	538908	466663	500416	503564	481139	463844	498227	470876	463259	445975	511713	488078	475100	496031	528502	399704	514211	530895	494755	463464	490338
3.17_728.6433n	177054	158137	145194	148381	175166	146054	150335	150449	148104	147309	136862	147731	153037	149008	117216	156249	126031	141932	152281	149198	156361	177457	173703	166307	153856	166256	149746	169355	181619	180466	173593	164165	171364	155462	144774	150467	156791	148537	156130	147897	160693	136660	141273	138960	160806	142528	132196	158756	141563
3.19_892.6498m/z	86712.5	94978.4	78643.7	75301.8	53469.5	58794.4	49031.9	79496.7	44893.4	50227.2	65994.4	80943.8	85362.6	29608.3	71098.9	59554.7	55734.6	61050.6	66972.1	61621.1	81285.7	78661.6	68323.5	53518.1	62892.7	58961.1	57766.8	66012.1	79540.6	85871.4	113064	91751.9	57313.4	45802.3	49158.8	46518.1	61779.9	64145.9	84425.5	59199.2	44494.5	71792.2	78866.7	37108.9	51985.3	52799	45678.6	74356.2	59399.4
3.21_578.3563n	287671	293335	299954	297405	307144	324723	316202	283286	257192	307164	328357	295354	327367	312196	322367	317615	293610	363483	332379	323727	342789	350626	301614	342519	285294	273196	284304	320580	329492	292784	292453	301666	325857	304427	298395	305437	283312	270280	324802	301629	302213	326933	344444	265631	338667	342425	297904	308992	328436
3.23_585.3134m/z	204928	176679	166212	171319	197988	194682	177196	184927	170802	182078	167239	194715	178541	170236	164578	184978	182172	182969	176559	163339	160899	164037	154397	183488	154717	158599	168222	167229	169875	150987	194555	184038	189069	165287	164631	171736	180163	160837	173746	185007	184892	172925	169129	173126	182334	174371	175404	180392	173480
3.23_660.4242m/z	115384	149251	132062	111758	177351	156493	123069	194159	193904	172039	176751	228358	216936	273851	272764	231003	266748	160162	352476	333087	248364	324687	253907	201288	198666	210562	257095	282810	159291	194668	125437	151218	190564	119346	190601	167195	207905	168080	171287	250523	244473	179448	186243	239672	302317	196420	185789	251471	139732
3.26_1048.7035m/z	89944.9	82385.7	85937.4	73848.7	107241	88595.6	79787	75749.8	74348.1	59467	76886.8	80557.9	78290.6	56562.5	74095.6	54542	78372.3	80435.2	79616.7	72885.7	90671.9	97465.9	84200.9	85807	97636.9	91132.9	90070.8	98511.2	65314.6	83396.2	103796	75374.8	77372.6	58716.5	73288.7	97067.2	47926.8	55143.2	77963.7	55614.4	79989.3	49674.2	75407.6	74612	56856.6	85768	73634.9	71391.9	64909.9
3.26_606.4507m/z	64743.7	68901.6	76182.2	109441	82822.6	82265.6	81227.5	79952.1	94101.5	84746.3	84508.6	73539.4	106350	61363	69542.8	82125.6	51445.7	88256.6	66857.5	74119.9	63258.3	75282.3	60165.4	57463.9	60354.7	74065.3	63638	72547.8	78313.3	83887.4	75062.6	86842.7	46962.7	80520.5	60940.1	73775.1	53693.5	86595.4	56983.5	75194.2	72837	68989.7	68843.1	64874.1	79795.5	72696.8	52382.4	54372.6	60705.5
3.28_740.3547m/z	83124	74671.3	84699.5	104548	96153.3	105085	87239.1	120683	101951	85224.5	92563.3	91798.3	88296.9	101701	83192.9	94507	83601.8	75924	72393.3	82316.7	82547.8	90311.6	80248.2	89311.4	87019.9	79039.2	100598	66028.4	103818	72092	106073	99428.8	129323	95960.7	92940.3	88811.3	86552.8	74967.6	96934.1	66665.9	91477.7	80428.4	76228.4	83788.8	87010.4	90693.9	68935.1	82250.4	102373
3.29_354.4099m/z	4.48395e+06	4.89939e+06	2.99507e+06	3.81995e+06	3.65462e+06	5.29341e+06	4.77123e+06	4.78838e+06	5.946e+06	5.04181e+06	7.59427e+06	9.07095e+06	5.16086e+06	9.54189e+06	1.1011e+07	8.60498e+06	8.4511e+06	4.89923e+06	9.59979e+06	1.46684e+07	7.5526e+06	1.13773e+07	1.1817e+07	9.39862e+06	1.10455e+07	6.62157e+06	1.18328e+07	1.32246e+07	1.21314e+07	8.11683e+06	4.16852e+06	4.99773e+06	4.69275e+06	5.4858e+06	5.96235e+06	5.07059e+06	5.78995e+06	9.1482e+06	6.05309e+06	8.15646e+06	8.93487e+06	7.82626e+06	4.36942e+06	8.25806e+06	7.53526e+06	8.50354e+06	5.91633e+06	4.74186e+06	5.79915e+06
3.29_590.4846m/z	54163.2	38595	25650.7	44007.9	32003.4	44055.9	41234.9	49310.1	46743.3	37077.8	61686.5	76991.1	54857.5	78029.2	91531.9	94798.5	79487.1	48129.3	113070	86810.2	40044.5	61068.7	70309.8	73104.4	70596.3	44397.8	79450.1	80354.6	63595.8	53007	40504.5	48027.3	53962.4	52454.1	68112.9	44916.1	46900	76121.2	50135.6	80901.4	80907.6	63202.5	46503.4	77267.2	81950.3	76255.9	44913.2	42884.6	44961.2
3.31_615.3693m/z	359918	397047	361903	387401	377215	498301	443952	519969	565257	523887	639617	1.00704e+06	486298	1.21961e+06	1.15751e+06	943814	1.02926e+06	507625	1.05535e+06	1.09208e+06	556828	1.11098e+06	979741	775811	895276	564700	1.02397e+06	1.14893e+06	780553	568529	391412	483551	431683	475332	386321	493984	505720	781590	534280	928381	892551	925137	585393	1.05918e+06	1.10383e+06	943999	452783	476294	470555
3.31_674.4397m/z	184496	213173	189891	189756	202067	223532	227794	239385	261584	237559	284798	412186	226569	498044	469818	371848	426350	242275	431816	434712	251912	411551	396193	283858	344560	247369	369850	425555	268220	204319	201884	236602	210584	213478	198581	230828	235045	313283	249997	407842	381853	374418	235558	415974	426402	383995	216204	217769	198402
3.32_818.4324m/z	36394.4	54258	58883.6	44576.2	52568.9	53358	54669.7	68294	61844.8	52291.3	47776.1	42376.2	57593.9	49878.9	31501.6	39932.7	53773.6	41286	37359.2	39945.7	44448.7	35455.5	35182.7	29561.6	36588.8	39090.2	50581.1	49945.7	33043.4	50307.1	43905.8	72039.6	49732.6	45966.7	48226.9	50842.4	62954.6	35366.5	50040.6	42553.6	46110.5	51185.9	48902	41434.4	43821.7	47427.7	39496.5	46712.2	35403.4
3.34_940.7837m/z	305196	263342	361422	364965	208393	54323.4	24875.6	51113.1	38547.7	677389	4.27616e+06	1.83073e+07	2.33638e+06	6.16347e+06	7.64893e+06	1.23041e+06	257430	113067	212959	135633	80964.8	326705	318344	327772	1.1329e+06	415716	497611	905640	335804	159190	260470	335665	100632	119942	37312.6	34853.3	323431	1.04669e+06	880801	1.67203e+07	1.31935e+07	5.57894e+06	1.29724e+06	713747	169043	149184	82013	95539.3	42239.3
3.37_557.5021m/z	2404.53	675.824	1685.89	3819.23	1779.65	3655.62	1224.64	2207.05	1328.64	7313.7	2870.51	3077.96	11931.6	4599.14	8064.96	4378.99	6339.02	6531.75	6699.13	8945.65	12840.9	9450.75	20647	10926	12879.8	10215.2	16039	11285.4	15434.7	14371.5	2220.75	1354.22	1685.12	1709.86	666.098	3076.21	4803.38	1387.76	4065.3	1601.26	8039.89	1653.22	9049.61	2965.03	7106.91	2164.03	5897.33	4649.61	13064.6
3.39_580.5004m/z	66995	68755.1	53571.8	66697.5	85403	76767.1	68834	75092.5	59051.3	68145.6	54492.3	73770.7	72667.1	59050.6	77225.6	77578.8	70727.9	65527.9	75775.7	57378.4	72272	64329.7	99177.2	81896.6	73991.8	70764.9	80893.9	73787.2	77842.4	83286.7	72543.6	62950.1	66040.9	64470.2	74131.3	57693	63062.3	61080	65131.6	80877.3	72137	50182.4	62908.4	73230	77370.7	67886	65244.1	52627.8	69156.7
3.43_250.2292n	56817.2	170146	57584	54918	44997.8	94759.8	153561	32375.1	108651	60150.4	85312.5	29838.2	96336.7	80792.4	155501	53961.7	56749.5	25581.4	121652	49109.8	85440.2	109864	72855.9	74620.2	48648.6	85840.9	31131.6	89441.1	87898	64937.1	58843.7	47335.5	112042	95953.1	164233	66556	123223	96268	42314.5	64469.4	86089.5	56121.8	133992	106798	50885.6	69958.7	24756.4	38934.6	93894.9
3.43_264.2449n	102647	239621	104850	101057	98503.2	161630	242629	74073.5	182726	112921	147108	78859.7	158161	147504	232412	103383	106633	70161	186508	87011.7	134360	175927	118644	122629	90681.2	140920	64997.9	137268	138188	102117	112211	85731.2	183345	155370	246089	111530	191146	160904	81477	113230	153946	100976	205167	161088	103159	124847	63901.2	84129.8	158790
3.44_222.1978n	45018.2	115340	41749.1	44383.5	36555.2	72304.1	126330	29733.9	88409.1	51066.8	67310.6	28519.6	73913	71685.6	125047	47548.9	50196.7	26235.9	94676.3	44998.1	69195.9	87069.7	57760.9	65849.8	41522.6	65068.3	28175.7	70666.3	72281.8	55976.4	47113.3	35379	85910.8	78450.5	125397	52113.9	90344.7	73339	34886.1	50450.5	67579	47841.2	111967	84486	46822.5	55122.5	22522.1	37348.9	75934.6
3.44_236.2136n	51039.6	145604	44944.9	51396.4	45448.7	84174.8	144216	31376	97894.9	53925.8	81115	31786.2	79473.6	78388.8	136898	50624.8	56244.1	26598.8	113507	44741.8	75791.8	105264	66267.5	70378.6	41280.7	73370.8	29515.4	75378	70818.4	53433.8	56494.7	44007.2	109004	91421.8	159515	56938.9	111785	86243.1	37012.2	60712.6	80444.9	47753.4	116217	90515.4	47424.2	61728.7	27406.7	36219.2	92003.5
3.44_320.3081n	899213	2.78098e+06	859723	892930	671174	1.36739e+06	2.34958e+06	503641	1.73297e+06	902949	1.33694e+06	435747	1.48104e+06	1.29244e+06	2.4197e+06	816508	846541	436116	1.79739e+06	714434	1.22999e+06	1.66586e+06	1.02635e+06	1.12136e+06	705063	1.30995e+06	453232	1.30563e+06	1.32695e+06	941268	986473	725859	1.68788e+06	1.38654e+06	2.4824e+06	960514	1.86197e+06	1.44797e+06	578002	927586	1.33165e+06	822038	2.09997e+06	1.57136e+06	807968	987502	403459	565014	1.41182e+06
3.45_207.1158m/z	27746	27325.8	23813.3	24297.9	27952.3	25883.3	23010.6	19941.8	19585.7	22423.8	24684.3	23384.5	21100.9	23292.1	20586.1	22214.8	18426.3	25343.2	26143.3	24978.3	29165.6	27198.8	27430.5	32501.4	31545.3	25903.6	24179.6	26075.9	29996.8	26597.1	27861.8	27997.9	24815.1	24734.9	26655.1	21957.1	22548.1	22939.2	26223.8	21823.4	22399.6	21496.7	20471	16942.6	20234	25709.7	22557.2	25286.7	24598.3
3.48_382.4400m/z	63671.9	92195.3	37235.7	63229.4	50859.5	77272	58786.5	67747	88980.5	86447.4	106593	142499	88374.2	147801	180305	177967	151726	90941.2	195536	213057	117774	168815	205655	157372	221572	153005	233477	268091	204870	144825	77463.5	79455.8	93805.6	84608.1	108105	73931.4	93832.6	129563	79214.1	119219	142858	130941	89641.3	172531	152073	169201	126277	70277.1	79037.3
3.50_652.4507m/z	135190	129555	130345	116714	131736	124857	120529	147002	110965	117031	127258	148749	110079	134980	126516	121483	128871	146399	124002	141824	131885	119451	113656	130310	137707	136391	116802	132130	141103	108837	145903	140868	125855	114498	122606	123427	112290	119996	140480	122587	110975	130554	113564	115519	133315	133705	137662	126683	116956
3.51_1186.7457m/z	133332	65185.4	88827.1	82106.2	95706.8	77229.7	69479.3	65200.7	52251.1	61758.7	75888.5	96946.6	115623	85240.9	89190	81013.1	73217.9	77123.4	85862.7	62483.7	78216.7	85538.6	56362.1	55043.5	62533.9	76752.2	51680.7	107952	70597.5	88227.5	106619	101648	62590.6	45138.4	56164.1	69736.2	72139.1	70188.7	123443	132895	31806.3	90863.1	95017.1	110326	83329.8	92212.3	78597.3	83467.9	56441.7
3.51_614.3251m/z	38756.9	38790.6	42518.7	50643.5	41753.7	53640.5	34364.3	44763.7	40793.1	31929.5	33439.7	35768.1	31381.4	44888.4	35938.7	32573.9	42595.4	35488.7	35015	29814.2	36484.7	38876.8	36629.2	42235.6	32322.1	30744.1	43060.9	29220.6	40899.6	34381.5	51695	42666.2	46862.7	41693.6	38767.5	40971.5	41658.1	33358.6	29529	33157.5	35765.1	40949.2	27451.2	33101	39393.3	34892.4	39185	28624.5	45552.9
3.54_654.3869n	498333	528352	494664	499056	586036	532197	529225	546720	434351	511691	523889	546735	490537	564489	563767	493769	511934	602675	611176	562086	583902	563476	524355	558702	561043	521021	515912	591466	636719	508410	542144	565246	486372	482747	520603	508730	465700	521196	572772	520760	515915	594568	526324	497298	576876	625759	535958	510521	477015
3.55_1130.6726n	84864.3	71543.9	117438	121952	173677	108916	115478	91045.4	161030	93144.9	119206	94456.1	90885.8	94109.8	113910	86559.3	76066.5	76625.1	114091	80918.6	111821	78861.9	77934.8	50454.2	94408.6	102758	78206.4	77304.8	50176.6	67241.5	81613	124212	93527.7	77048.6	112120	95704.2	116763	88471.8	154066	94645.3	63194.2	77663.2	106715	81074.1	67149.9	121227	87777.6	109732	93897.5
3.59_473.4098m/z	2551.27	601.871	1767.63	1027.07	1993.39	1522.33	1651.89	427.804	336.137	285.042	243.34	392.349	538.815	867.493	399.83	602.593	504.927	809.722	906.739	307.501	258.303	447.026	619.317	341.808	820.654	45.0705	93.1174	581.916	35599.3	662.869	1407.51	2631.26	986.296	1096.19	1179.32	1298.49	622.355	738.131	665.256	1540.08	313.926	953.331	198.659	242.705	418.574	2526.16	198.5	200.559	417.566
3.61_610.4064m/z	7366.79	3718.27	5622.13	4570.44	5902.24	4428.93	4314.87	6189.32	4256.01	5472.28	4499.53	5114.81	5131.58	6687.82	7028.61	5614.72	4084	7443.76	5272.04	7923.54	5403.22	5239.33	4121.93	6322.27	5562.76	3321.51	5647.06	5717.5	5128.39	5191.71	5460.88	5332.46	6247.84	5268.4	3971.99	4795.28	4279.37	3793.18	5353.68	3535.25	5342.31	5409.47	4641.29	3456.16	6540.28	4543.22	4904.89	4241.94	5148.13
3.62_312.3261m/z	287852	358307	213606	312233	348754	463596	431216	406077	472193	371572	590073	935008	394421	1.27001e+06	1.46728e+06	918763	820971	550908	826438	1.04807e+06	475622	936297	940089	744153	943307	495569	804766	818774	537146	406777	330462	359625	359703	460267	510013	359059	412292	797193	394660	754911	837197	964584	457771	1.03143e+06	1.00484e+06	1.065e+06	444592	313411	461865
3.64_410.4722m/z	11510.5	21762.1	16668.5	13671.3	12389.1	26305.9	18034.4	27135.1	25298.1	17723.8	26677.2	44249.3	35014.6	46092	64312.2	43179.1	55750.5	23010.4	54506.9	53099	34129.1	40985.7	36478.6	48707.8	35749.4	32448.7	42922.9	47012.6	57793.9	51434.5	6674.15	23633.3	15382.8	19812.8	36554.1	17858.6	24916.9	36836.4	29167.2	31018.8	34257.8	34513.9	24880.3	35842.6	49160.2	51300.3	25012.9	33483.8	28458.4
3.69_566.4552m/z	144011	129568	235842	233896	262189	154262	160903	288953	273002	165424	171099	157458	223827	141281	137654	200863	150855	247064	184532	200495	179367	151085	178738	207734	114864	145458	155726	193742	146852	212996	137310	221401	174025	189746	139518	129194	107990	241346	152260	204664	201501	204560	149685	147213	161024	114739	138377	142578	132259
3.75_547.5199m/z	3219.98	7087.68	4398.24	2461.06	1896.54	3707.45	16655.7	1361.24	3940.4	2366.6	6063.56	1131.71	3460.46	3402.5	5326.41	2429.73	398.111	543.106	5347.67	2392.4	6435.04	9965.22	3343.18	5257.07	7395.86	3649.24	2685.02	5653.3	5895.1	4972.34	6783.27	1437.5	7280.52	4093.76	13618.4	2009.43	5662.03	5568.85	1847.2	3501.19	1980.82	1547.67	4169.64	3432.08	1313.09	1653.98	668.986	458.298	3166.93
3.80_221.0870m/z	6726.86	7574.96	7257.59	4575.21	7815.35	6678.07	7038.59	7382.73	8080.02	7284.21	6487.2	7938.49	6770.54	5878.55	8511.37	6704.09	5872.72	6561.64	5484.55	4185.54	2508.45	3040.83	2225.59	1788.36	1992.37	3877.65	2090.99	3594.54	3872.04	2888.05	5087.29	6915.24	8043.51	7897.18	7545.5	9704.42	6202.09	7082	8867.79	7301.13	8669.55	7622.37	6285.85	5678.67	6354.1	4864.49	3392.47	4751.01	3968.48
3.84_1140.7272m/z	32707.9	18992.3	39074.1	33985.4	28023.7	30735.2	31899.6	43603.1	27617.2	40965.6	22893.6	30944.3	40697.2	25499.8	29334.1	31152.3	27080.5	47939.6	32649.1	31884.4	45861.4	43343.3	31985.5	35910.4	32604.1	31694.8	24846.4	42373	30661.8	54814.5	34950.5	35412.6	39494.5	30708.5	28374.1	38605.5	21177.7	30685.8	36638.1	23997.5	34409.2	44690.1	41745.4	38398.5	28261.3	33283.8	36196.6	35074.3	33956.2
3.85_368.3889m/z	97169.4	85429.4	68387.3	62351.9	73547.8	85052.2	82344.2	85239.5	98679.9	88538.5	147966	247104	79305	299502	316749	274447	220049	132334	236483	305788	115850	186639	218779	133100	178914	103922	242578	208525	140430	92605.6	68365.2	87413	107608	72873.4	80789.4	83736.4	95604.2	177134	95790.3	171966	172362	192443	126694	248314	207865	230417	82355.1	65027.7	115730
3.87_661.5228m/z	207870	397506	343424	430083	180698	327193	320223	350157	270105	271150	408002	240085	259900	362238	246239	347537	272905	222276	271759	257468	352368	228638	268549	286308	318157	311860	251509	439095	369325	455388	305829	257748	229736	320334	230186	243884	234402	303285	254796	319345	214118	267168	337607	311786	238094	224281	353690	327081	246744
3.88_326.3414m/z	10923.8	26309.1	12996.6	12725.4	14600.7	23572.5	39714.7	14068.6	19213.3	19806.2	45164.7	45664.3	22973.9	59133.2	96837.4	49709.9	43239.7	27182.3	51956.6	62154	32729.8	58666.2	48923.8	34959.8	42333.1	39364.4	51301.9	58656.1	15347.8	23204	13773.2	15545.1	18263.8	31016.2	53560.1	22373.5	21763	51223	29369.6	49102.2	56724.1	48224.7	29978.5	69241.3	50359.8	54720.1	20454.9	13569.4	30212.5
3.89_398.3433m/z	200784	247584	199073	193139	225155	246359	229319	241260	265748	232621	286862	352199	264712	402588	455464	448407	389853	256708	384459	470437	265412	351073	358955	312804	360544	257375	403275	371786	334434	255602	201182	234077	295596	249680	266755	251965	304982	356359	255245	311891	375596	326995	278560	418551	368295	404080	280564	229048	283933
3.90_1168.7314m/z	35214.8	50051.9	41422.5	18337.5	31540.6	62535.9	33203.3	45793.6	28648.3	50176.6	50988.4	52613.4	90124.2	60963.9	72486.2	69682.9	50295.6	50837.3	87558.3	40521.6	69455.3	38713.1	71127.4	68975.9	111221	87533.4	68421.3	89879	61053.2	100902	30806.3	26565.4	25055	21136.2	35753.8	49378	58124.6	48298.1	82045.9	67322.6	58385.6	38644.7	56461.8	52668.4	48633.4	14352.5	37558.3	22309.4	34447.5
3.93_674.4382m/z	84610.1	75055.7	85713.9	83180.5	82585.7	104889	94869.4	103467	115384	106242	150434	217777	92373.9	265146	280996	194753	198544	118693	217721	239784	106642	193811	197934	130485	200553	111004	201456	194674	154844	104001	86380.5	96288.4	99513.1	94314	97635.9	104237	93724.7	164572	107531	175548	193702	186223	124632	246766	226234	216467	111611	97981.7	109448
4.01_1150.7097m/z	33651.3	48525.8	46172.8	36578.2	35045.3	41741.6	24666.5	39507.7	51602.5	35962.9	46665.6	36562.5	39701	29589	23553.9	33612.3	21703.9	22214.9	36214	27078	39033.1	32312.6	18752.8	26722.9	33493.5	30923.5	29193.3	29290.2	32320.3	34720	27175.3	60736.9	50735.6	26879	20663.7	46267.3	27596.9	42447.8	42176.6	32733.2	40546.4	25385.3	33783.2	27014.2	32008.9	34431.6	36654.3	34523.7	25255.8
4.01_714.4664m/z	98086.9	134536	96108.9	96241.1	103399	105005	133553	113756	109209	104945	140411	111520	103407	128012	138851	114737	118746	141435	158634	139992	140629	127170	114445	132582	141889	128739	129285	137968	129077	112198	125908	133927	123102	76482.2	126352	101897	85428.5	113710	137008	125176	120755	130641	119981	115442	134730	128626	131855	109730	108602
4.04_660.4222m/z	41085.6	35924.1	33828.7	40842.6	36088.7	34643.6	36516.2	48564.8	42586.4	43668.1	58042.2	74593.6	41481.1	93281.4	110645	82884.3	84918.8	56428.6	105021	118659	44184	93877.8	89083.3	65212.1	81228.8	52332.4	91212	99700.8	70113.6	38280.5	30730.3	44718.4	46169.3	33253.2	36097.5	35393.7	36963.4	62301.8	34635.5	65791.2	80435.7	80846.8	47946.8	111211	98470.1	94294.9	57042.7	46224	39717.9
4.06_534.4706m/z	44855.2	41570.5	42177.7	44105.2	48718.8	43144.4	41281	43328.9	37955.8	41132.1	40354.9	44290.4	36069.1	39744.1	44191.1	39471.3	38637.4	44751.1	45972.4	44354.3	45805.9	38412	48332.7	51451.3	40628.7	42464.3	36922.8	47696.9	45229.6	51795.4	38286.9	48677	46376.4	41580.1	34309.4	32968.2	44522.9	41672.2	43185.5	41545.3	40632.7	36658.4	46598.3	38688.8	40978.5	44854.5	44338.8	41501.7	48177.3
4.09_1152.7331m/z	72596.3	80809.5	30677.1	31071.9	43025.3	25017.5	44948.4	18873.8	33627.1	26087.3	36346.3	24333.4	27909	37606.2	50098.8	26951	58829.4	35339.7	25808.6	23941	28160.7	30264.9	17120.4	10813.5	61322.9	35227.3	22844.7	40078.2	9975.08	33329.5	45644	29638.5	61795.3	24699.4	66691.2	25872.8	46006.5	25298.3	42891.7	36615.9	39028.5	19274.7	46350	23994.1	27014.8	21479.6	12257.4	26077.1	14273
4.13_1156.7572m/z	62612.3	51544.5	38509.4	33552	41176.3	42944.9	39073.3	23056.3	38410.3	38698.5	34148.8	29958.2	48161.8	48489.4	45146.4	45272.6	47397.3	53103.5	56956.6	49256	71062	67193.6	50397.6	53899.2	46514.4	61308.5	63171.2	42169.4	52324	49867.4	20536.9	33597.7	42385.9	36893	47073.8	46862.2	47816.3	36628.1	32413.2	44675.8	39732.2	36788.1	51722.4	47320.3	40806	31225.5	41501	41756.7	56260.9
4.14_384.3825m/z	26130.1	20579.9	13985.2	22809.7	23897.2	32659.1	26708	31490.7	26471.7	32782.4	64394.7	104984	40591.5	109225	124607	115227	90020.5	42501.6	125198	123631	39003.3	99245.9	94989.3	50374.2	73288.5	40905.4	97504.7	101377	65237.2	31598.1	21416.3	27294.9	38044.4	32878	29822.2	38238.8	42456.4	57134.2	37201.3	91249.5	71599.6	84921	58338.2	95133.6	89482.8	84043	44670.9	25301.6	39365
4.17_687.4560m/z	166871	167673	185857	191104	145282	183721	168904	181961	157330	149775	172102	155668	164255	159040	164676	185844	166802	172936	167757	176428	175124	158650	170417	199998	177763	188823	162512	205383	182401	209369	183285	178949	159924	167283	168226	181309	155774	153540	172492	181708	164222	157605	174016	156017	153155	152280	182285	179838	156140
4.20_1018.6938m/z	76991.1	108234	75906.6	56145.6	113904	96964.1	76868.7	96886.6	99591	69994.2	103409	101580	90328.5	99327.6	89522.7	101445	100309	99267.6	109562	104127	111468	88865.4	80472.3	93959.4	104634	99750	85919	101286	102914	120417	84689.3	114139	79248.8	90558.9	71534.7	84882.9	85886.4	74019	117312	104449	91529.5	89676.2	78507.4	86674.9	70224.8	93081.9	100976	102838	98624.8
4.20_608.4656m/z	234338	290908	407073	379935	306232	353718	318183	313602	314089	286434	275779	258714	405172	241427	269927	383548	230873	357088	283935	306451	330988	298349	287366	279651	309938	320759	261782	333423	312709	367187	268484	354000	275400	402550	260381	219509	221941	344734	264102	515046	312761	268869	259930	343743	260267	333129	227742	185729	251322
4.21_682.4179n	315205	278610	280595	275253	297240	255956	268482	217043	198935	241504	254561	244456	238195	249126	279092	243083	234287	286634	301148	276157	319506	261978	268579	348274	310966	294349	276626	250752	275709	244550	293862	314929	257599	246030	244177	225229	222169	243489	274981	269750	239498	268517	265265	217763	251318	278656	264551	252478	257663
4.27_728.5167m/z	132008	322083	198597	495719	232812	192566	262667	325008	164596	194230	394198	372941	195894	247685	172734	234379	135691	197568	197802	353570	162006	179547	166690	216520	377859	315752	223473	328573	183291	199725	174697	168778	190220	302932	490814	142098	156868	477601	269150	254001	124986	359188	215361	321743	190605	155212	168826	149262	158578
4.27_796.5245m/z	45063.7	56722	73300.5	73593.2	62512.7	91919	82115.8	64686.9	85736.1	70308.2	89236	69480.5	77987	79824	60355.5	67171	71074.5	71161	60013.5	63913.9	90149.4	62358.4	78139.9	68968.1	57083.9	66081.5	64061.5	96048.4	76408.7	112240	78782.8	62113.4	67753.5	76886.2	68244	71530.1	62457.4	77160.6	62387.3	80964.9	62953.4	75725.8	62922.9	69883.4	62029.2	62489.4	80379.9	57959.5	65661.3
4.28_683.5362m/z	49088.3	45797.8	50221	42994.8	45933.5	55934.8	48118.1	57739.9	50599.8	48340.8	53603.4	60603.2	53886.5	52728.5	54213.9	48768.3	49930.5	48865.2	54155.9	45855.5	46448.2	44960.5	42699.7	48164.9	44711.1	47945.9	47483.6	50268.7	45144.8	46504.7	53978.1	51469.1	51856.4	48547.7	51091.7	55415	46938.5	42181	51675.2	59496.8	52666.1	50648	50854.4	51345	48254.5	50916.2	50230.7	50329.4	46969.5
4.31_470.4198m/z	199211	184400	162452	158012	174957	185784	156862	159893	166558	156315	146570	164740	155032	152178	154240	164055	153847	158802	172702	163208	148336	147638	147424	178141	152460	162138	153355	152920	149295	150360	185757	162796	170612	157244	161425	161071	157842	151024	154683	151061	170025	145769	148799	155391	153335	160179	166983	159386	161753
4.33_1152.7156n	104776	104097	101420	92375.5	104943	142820	83549.6	87939.2	123508	118144	97587.8	88171.6	81290.3	107757	98303.1	119523	98104.9	69904.3	115142	83466	106063	109017	112218	95734.6	100888	117541	116696	132541	128053	161892	75043.1	126754	88212.7	112608	103432	118385	82187.2	92844.3	91218.8	110830	79074.8	109707	82018.6	93386	89736.6	94777.8	81648.8	105647	91544.7
4.39_352.3571m/z	28071.3	30516.3	21368.4	19499.1	25209.1	30964.9	30111.8	23231.2	33454	33198.5	44982.7	52382.5	29308.7	78292.4	80230.8	75310.7	63110.8	37328.3	78377.6	74911.5	34634.2	64217.5	64263.5	43374.3	50891.3	33580.4	52360	52298.9	36735	28094.9	23772.1	26179.3	30347.2	29860.7	28985.4	25220.6	31637.8	46956	26560.5	49625.9	59461.6	53547.7	36027.7	57398.9	64867.4	64512.3	31168.8	28281.6	37279.2
4.40_568.4517m/z	114045	102697	144300	145368	124525	122502	146908	160077	144594	123095	130459	142792	132463	116115	174426	155946	132093	138139	152353	132752	155283	119838	127082	127766	140748	132532	106990	132368	115133	127805	103080	138545	114896	208071	120029	160247	118939	119922	141842	145799	135891	162844	161326	128001	118849	151918	133972	126191	118400
4.42_475.3874m/z	9010.67	11130.3	11419.6	10816.9	11796.9	14661.2	8777.76	8444.09	12523.8	10678.6	5941.38	7259.79	10496.5	7898.96	9487.33	12930.9	13476	10483.5	4130.62	12211.9	9866.01	10432	7802.15	13230.1	8535.07	7588.34	10129.7	13231.1	8085.15	7055.44	9831.21	13011	7504.31	13445.4	12146	10555.5	10011.2	7926.86	8039.37	7296.02	9971.94	10996.1	8971.69	12192	9256.56	10626.9	7637.72	8675.55	8376.93
4.42_539.2101m/z	117043	115388	109635	89814.3	106857	101441	106074	111109	109172	103281	93988.7	111539	100689	105263	111138	102583	99837.3	91794.9	102945	107214	96810.1	115512	88539.6	107612	82493.6	115996	86030.9	108929	71289.3	104651	116275	109107	112604	94709.1	105458	108538	104414	98333.3	101851	100576	109493	89643.5	98943	100047	103668	102977	93229.8	104501	108817
4.45_623.5034m/z	85538.7	91352.2	152130	295961	99781.4	95248.9	117327	80692.8	65821.5	86358.7	145797	112579	74493.5	109151	103179	94237.6	141340	96164.3	113794	112771	85199.1	120604	113477	70382.8	106872	99045	81978.5	65023.1	76912.6	111121	95571.8	169698	73773.7	90732.1	133566	70563.2	44121.6	90720.4	96536.9	87171	50972.4	92669.1	93649.1	120436	72299.1	69142.4	75863.5	62412.4	91080.8
4.45_716.6642m/z	152553	152903	147941	145018	168468	143431	140919	144683	142459	132705	126433	147330	145204	141518	123731	131317	134647	142553	145120	139567	149740	149321	138698	152609	143675	145820	130542	134541	140350	146603	160887	152786	164439	121337	144375	147831	152553	136257	150239	143316	138999	121866	132627	126805	155857	151693	148044	154924	143836
4.45_900.5609m/z	78646.5	79764.4	186623	413602	109217	118099	145228	90498.8	51143.5	91095.5	176945	148129	78254.9	120321	103789	74398.6	148716	112330	117115	135970	79003.3	174700	131546	65938.4	138926	129768	91661.7	54533.3	81083.1	167900	110255	222276	63756.4	93525.7	173310	71709.1	29181.2	81586.8	107810	81680.3	29806.5	105884	93601.4	142550	81058	72412.4	89351.7	67800.4	102034
4.47_780.5544m/z	2.69426e+06	4.49481e+06	7.25174e+06	2.73091e+06	2.37166e+06	1.16203e+07	8.32599e+06	2.65268e+06	4.57117e+06	6.42992e+06	5.54856e+06	3.17972e+06	1.10149e+07	1.39145e+06	3.34465e+06	4.02014e+06	2.34419e+06	8.59362e+06	1.30075e+06	4.79671e+06	3.358e+06	5.25933e+06	2.96459e+06	6.21474e+06	4.45602e+06	3.25948e+06	1.25346e+07	6.14631e+06	4.59006e+06	6.53291e+06	2.86708e+06	4.53398e+06	4.43321e+06	7.00617e+06	4.29907e+06	1.92203e+06	4.37135e+06	3.80322e+06	4.82561e+06	4.08638e+06	2.04392e+06	3.87581e+06	4.41939e+06	6.96608e+06	5.0428e+06	3.58186e+06	2.14414e+06	1.27999e+06	6.85283e+06
4.50_328.3575m/z	1.75634e+06	1.56493e+06	1.21817e+06	1.30475e+06	1.57991e+06	2.13973e+06	2.33298e+06	1.98443e+06	2.98508e+06	2.33491e+06	7.14461e+06	1.22023e+07	3.1134e+06	1.47517e+07	1.92363e+07	1.20073e+07	1.3697e+07	1.10543e+07	1.71576e+07	1.59487e+07	4.17229e+06	1.01682e+07	1.1347e+07	6.82072e+06	1.19149e+07	3.72621e+06	1.55781e+07	1.7904e+07	4.37804e+06	5.23383e+06	1.40839e+06	1.78522e+06	1.63958e+06	1.86654e+06	2.48071e+06	2.25555e+06	2.74953e+06	7.85649e+06	4.34281e+06	8.29006e+06	9.48715e+06	1.02773e+07	4.17624e+06	1.77222e+07	1.70615e+07	2.61044e+07	6.49583e+06	3.76041e+06	4.47099e+06
4.51_728.4865m/z	130976	186259	149633	168471	176333	148659	159672	127034	132727	146931	187660	160155	143352	170120	149616	161391	143660	176319	169951	199879	159227	163318	148161	169933	183612	182070	154266	177256	148038	152797	153484	163837	142489	170470	202793	141217	135321	181642	154963	154120	138739	159795	161204	181202	162699	154675	157380	145879	146841
4.51_742.4999m/z	128026	131415	120471	104568	112938	122226	112250	108895	95162.6	134304	117313	94761.4	100947	122065	105005	102160	96443.7	129316	100639	115946	100647	104828	100848	116601	99052.3	104703	94352.1	126274	106640	100537	133653	111618	118627	123318	126579	117518	108504	111478	120458	123266	98925.4	118601	104854	105031	114067	115846	102496	96873.5	100946
4.66_776.5751m/z	24564	62144.1	47142.4	73912.8	27913	35323.2	49656	56961.1	30160.4	24783	59866.1	46395.7	32909.6	58694.9	27978	43027.1	17784.5	28316.5	25909.2	28954.1	19814.7	16727.6	20891.7	22220.4	42633.9	34627.3	19125.4	37898.9	19962.7	27679	36942.1	39078	50737	61369.5	63450.8	33658	25938	74109.2	43462.5	41877.3	18829.1	66427.2	47851.8	49058.9	36850.1	15031	33691.6	20218.2	15010.9
4.70_548.4030m/z	87707.4	88448.9	93499.2	96482	94034.1	105995	98142.3	96856.9	102965	103288	118595	137792	101525	148354	180755	146873	148083	116702	190946	158050	117354	153779	172415	161380	206855	166791	241165	227090	102292	140274	114453	109370	102484	101991	108083	86288.3	99307.6	128482	105905	136381	133642	146399	110494	164963	137805	119317	128483	100191	82809.8
4.70_754.5389m/z	2.53206e+06	8.7745e+06	4.80058e+06	7.83505e+06	2.25449e+06	3.20185e+06	5.03407e+06	5.25024e+06	2.69778e+06	2.7314e+06	7.07837e+06	4.52044e+06	4.23699e+06	5.632e+06	2.8715e+06	4.15131e+06	1.44553e+06	2.59501e+06	2.48187e+06	5.23061e+06	2.38025e+06	3.1939e+06	2.68635e+06	2.24178e+06	7.23854e+06	5.28591e+06	4.06606e+06	7.04911e+06	3.56678e+06	3.69468e+06	3.44166e+06	3.96582e+06	3.46476e+06	6.26161e+06	5.90464e+06	2.21429e+06	1.98526e+06	8.5951e+06	4.91769e+06	4.76614e+06	1.19388e+06	8.13394e+06	4.6956e+06	5.44418e+06	3.27257e+06	1.48694e+06	3.93645e+06	2.47829e+06	1.80539e+06
4.73_599.5039m/z	363765	602745	637063	1.42388e+06	811017	440302	459763	420960	241442	709384	1.09263e+06	595282	499893	625450	429438	430013	510410	512607	493902	587287	507633	536505	640521	331186	730534	569201	397968	437125	431335	639795	348838	422054	370535	795531	1.30956e+06	408704	253351	1.0111e+06	578313	640116	263085	677455	434878	536062	403136	282293	554960	405943	461106
4.73_858.5271n	779213	1.3817e+06	1.49342e+06	3.11942e+06	1.78865e+06	937500	1.01095e+06	916442	515937	1.44628e+06	2.25919e+06	1.28357e+06	1.06082e+06	1.39786e+06	971996	958395	1.11146e+06	1.12959e+06	1.06028e+06	1.20684e+06	1.0874e+06	1.09009e+06	1.38572e+06	680926	1.5557e+06	1.23356e+06	908942	1.01056e+06	910539	1.36832e+06	765714	970348	774869	1.67055e+06	2.76038e+06	852829	475345	2.05941e+06	1.15165e+06	1.37111e+06	558525	1.50575e+06	974782	1.24044e+06	867964	611906	1.1467e+06	825700	925670
4.74_897.4807m/z	26205.4	48570.8	42260.8	109562	55086.6	34149.6	30998.6	34856.2	15928	57190.1	79576.2	55227.6	34225.2	53324.5	30072.4	32528.5	35573.2	40719.9	43860.8	45852.3	47019.8	38995	51590.6	24943.2	60940.3	46167.1	34384	29282.7	20653.5	55186.6	27847.3	32328.9	41942.1	68894.4	115276	40578.9	19192.9	100903	32037.6	65044.2	27870.4	48930.9	36380.5	60710.7	24116.7	18745.4	46426.5	26857	34549.4
4.76_512.5042m/z	423361	456827	347850	371717	390706	433181	439018	501625	500715	485993	663361	931082	504795	1.08498e+06	1.24645e+06	1.14297e+06	955030	560924	1.07824e+06	1.26028e+06	556945	916171	899465	682334	877513	502645	1.00199e+06	947788	883924	522588	419392	458309	585163	423892	517811	487152	565280	791034	522827	773843	863260	893352	620420	1.0077e+06	925426	1.06804e+06	562414	480225	637041
4.83_830.5710m/z	3.69324e+06	5.22256e+06	6.58256e+06	5.11249e+06	3.06747e+06	4.70118e+06	4.70565e+06	4.55746e+06	4.17453e+06	4.00027e+06	6.23392e+06	3.83334e+06	5.48999e+06	3.08075e+06	4.15367e+06	4.51213e+06	3.03579e+06	4.70764e+06	3.63522e+06	4.56021e+06	5.31822e+06	4.61605e+06	4.16689e+06	3.42158e+06	4.00003e+06	4.69322e+06	4.63902e+06	5.91736e+06	4.29164e+06	6.40881e+06	5.02952e+06	5.85792e+06	3.17233e+06	4.43658e+06	4.63952e+06	4.01471e+06	2.07848e+06	6.34655e+06	4.11474e+06	4.15139e+06	2.75929e+06	4.8564e+06	6.20808e+06	4.24587e+06	4.78129e+06	3.7978e+06	4.56596e+06	2.5563e+06	3.17564e+06
4.86_625.5193m/z	132682	154119	243210	385650	216116	180356	207304	130261	120790	222765	296040	210023	302246	169553	179853	175782	128780	243084	148090	209876	234803	237804	185990	148433	194157	148402	249999	186324	161430	272873	126274	231976	133389	226078	398402	138406	92589.1	202588	168039	175306	133523	230918	185141	243512	179834	138805	175101	130997	187235
4.86_902.5761m/z	103636	173675	296233	454668	271148	190909	223555	156622	134243	269569	389056	277670	380256	188670	174283	198045	149939	288840	156308	246519	287532	239801	197369	136783	195750	142492	223310	188356	152007	341208	115324	256389	127926	260392	496414	150737	82140.9	224763	145649	191266	133308	278347	207047	274522	193768	119375	190269	89446	171813
4.88_924.5680m/z	36901	152125	103895	111207	36534.3	83305.4	68557.9	76534.1	61762.1	62334.3	130230	86097.6	65714	74841.5	40169.2	70028.5	28542.8	53361.3	43846.1	82328.1	44753.9	48737.9	39572.9	41063.7	127967	121223	70197.5	76331.8	37963.4	64454.3	36918.7	75148.2	47664.9	183017	71494.3	44411.8	32337.3	94348.4	95888.4	107486	23306.2	115317	57993.1	83630.7	34110.2	29821	58344.8	40800.9	31616.3
4.89_729.5320n	8.41307e+06	2.66951e+07	1.72695e+07	1.89697e+07	7.09329e+06	16750081	1.6871e+07	2.17932e+07	1.11649e+07	1.21507e+07	2.15518e+07	1.65085e+07	1.20757e+07	1.88368e+07	9.99957e+06	1.58365e+07	6.81087e+06	8.93625e+06	9848562	1.84321e+07	7.8564e+06	1.20048e+07	9.6467e+06	9.60229e+06	2.39082e+07	2.38637e+07	1.71026e+07	1.9417e+07	1.54646e+07	1.16866e+07	1.22682e+07	1.32796e+07	1.41103e+07	2.77621e+07	12560158	7.71769e+06	1.03432e+07	1.99854e+07	1.79525e+07	1.9087e+07	4.97704e+06	2.13151e+07	1.30323e+07	1.72704e+07	1.12321e+07	5.71301e+06	1.42045e+07	8.18508e+06	7.63864e+06
4.89_730.8052m/z	8868.02	147163	156673	169448	4950.39	118873	114060	86837.6	31084.3	42275.8	44382.5	92924.2	39087.6	86904.2	17128.8	80404.6	2035.48	14491	6741.7	147581	5553.33	29954.1	11450	13712.4	441733	432122	172812	283519	120042	43635.2	46016.6	64081.7	76097.5	63137.4	25329.6	7010.45	23170.3	49117.7	65315.5	76944.5	693.667	72552.3	48254	95318.5	25336	1894.68	47946.1	8607.86	3814.98
4.92_856.5857m/z	399396	713227	735029	809318	378967	456062	552737	396199	421109	553281	832984	473606	729265	371593	607040	516433	374907	460375	432917	583985	616509	635390	491441	359677	637979	526063	574151	773438	544813	685160	373053	689988	343473	711127	714509	405539	252517	775136	502171	581684	268179	524657	669821	628113	441951	363078	601452	345936	350541
5.02_396.4203m/z	86384.1	67734.1	56748.2	60861.9	66583.5	95768.7	71169.5	79164.7	107871	74509.5	171431	310799	85544.6	326292	395655	234963	229904	136849	268640	323696	103484	198672	264181	172990	222435	79684.9	300568	263816	184169	81489.8	81204.7	82335.1	77641.7	87548.6	80094	57391	94468.3	208812	90598.9	212911	235759	216991	103657	279564	240203	276738	95635	57032.7	79274.2
5.03_601.5192m/z	110051	127119	277787	236125	193234	328124	288802	171450	168353	277945	270331	196307	446866	130329	154801	206562	149147	323088	108694	201796	317259	282247	192359	222431	162636	158426	322990	188842	138249	317766	119089	301464	146927	260616	271054	152477	133285	143492	145154	183218	165171	237541	190029	266413	251656	216533	132647	113657	266928
5.04_878.5757m/z	150360	194734	413177	344284	292855	476618	424278	253812	238114	407024	427208	314154	687784	228542	257357	335318	250288	525257	175037	354423	547919	482833	352195	391854	320663	290069	646566	353475	287105	606006	156728	438291	224295	394157	383350	230677	209384	210263	235535	297953	238225	367328	308845	437274	428052	355141	225631	209655	447576
5.09_864.6226m/z	34525.5	61347.3	70833.5	61254.8	22994.2	35620.3	47398.1	48658.6	36696.4	35739	82858.5	31018.4	46626.7	39730	35662.1	45063.5	32501	49655.9	37527.8	52523.5	88048.7	66707.2	72714.8	50291	63762.4	49947.9	52620.3	88072	37707.2	82290.2	32657.5	67166.8	36645.3	61358.9	68185.9	46336.6	19793.5	87025.9	46719.4	53670.9	21703.4	59496	61079.3	46074	35950.6	33007.5	64492.6	44936.3	42720.7
5.09_890.5254m/z	97208.8	134484	119267	114029	73476.6	95015	101597	101600	101448	103362	147813	98177.1	114757	111866	108094	109242	75982.2	138699	81690.3	94334.4	164579	129333	115076	108483	133125	92744.3	100102	165663	97113.1	154708	110872	91251.7	77890.5	99183.7	104921	116499	73699	122463	95547.7	123398	83717.2	109591	152071	95676.6	100705	103622	134919	108341	113324
5.11_934.4633m/z	127744	157796	138591	118920	101662	117463	105109	138417	107346	101638	105088	114010	117976	127044	101373	132423	103001	109806	96762.8	124838	103992	123699	124918	115349	108349	116756	110312	90757.2	111760	96084.8	150926	153620	115505	159851	133044	119474	114621	114718	103700	124190	82655.7	97815.3	119093	110871	105114	118413	126724	100404	123872
5.19_384.3833m/z	83275.2	85582.2	70814.1	73469.8	88945.7	119375	120937	99610.1	123660	94235	153117	265518	99954.7	335982	398326	284062	276596	155848	337784	345397	151580	302987	336782	219854	262776	115962	277066	231454	214024	123533	71029.2	86436	113316	130829	137460	117628	114228	205445	104272	201851	214944	253928	127169	327738	302996	337710	141722	104949	117813
5.20_338.3784m/z	17200.4	13803.7	11268.3	10215.3	13221.2	20406.4	26392.2	13833.8	24863.6	22436.7	40207.7	64549.4	21368.1	70887.3	108468	48636.1	61130.1	38282.7	71405.8	80593.9	35922.6	70022.2	78004.4	51523.1	70829.4	36947.7	77552.3	79700	72809.4	41472	15707.5	13248	13135.3	12739.9	19399.4	18144.6	21849.8	43480.9	30398.3	47055.3	48658	64654.5	32896.1	69326.2	58702.1	74199.8	32473.1	21782.8	22992.5
5.29_757.0518m/z	11070.7	29805	9668.27	9134.91	4319.81	8931.59	43784.6	12093.1	4287.09	15766.5	26639.4	31385.6	18221.4	20499.1	31726.4	5392.48	36987.3	85350.7	24687.7	95085.5	26412.1	30240.4	35147.1	52656.3	210893	340116	109656	94589	89564.2	40728.3	7780.91	12235.4	12350.7	504.104	9391.89	16096.7	3623.34	2180.21	26972.8	4152.62	28400.9	21568.2	40827.9	26407.4	7407.41	45088.8	32701.8	23186.8	32729.6
5.30_411.2638m/z	44551.8	58167.7	67721.8	48602.3	56957.6	109160	74337.5	69962.8	68199.7	78437.1	90245.7	68967.1	75320.4	50135.3	54312.5	72151.5	53151.8	81717.9	43820.3	62006.9	83361.7	66919.6	66006.9	62351.3	45928.4	61852.5	75854.8	80782.6	56449.4	85579.1	53577.6	54913.4	65787.3	92005.9	65053.8	54685.2	65103	62571.8	55291.4	74285	66257.4	61591.7	68070.6	65847	73792.5	69025.3	52655.2	44950	74110.4
5.30_745.4780m/z	70985.1	134190	170619	123609	128627	331131	200582	157297	164070	228654	297041	176983	204164	106110	113144	179925	113293	227419	83802.2	153750	221256	179504	172040	186889	141261	165053	233140	234705	131598	268203	119015	127685	151750	266137	150818	131275	153439	160263	126398	198420	159213	152468	157793	170128	195906	157014	133406	86671.5	181854
5.30_934.4905m/z	208295	240084	262528	223711	222075	317378	288363	262173	270944	297282	288245	256240	292628	215389	224509	288037	226255	311545	200249	262711	278123	291032	242138	272773	245087	240336	318193	284013	240455	279025	242201	231187	261108	277239	237904	223296	285527	251576	246426	274267	273628	253985	254831	288392	265814	280684	235103	215455	268257
5.31_1563.1193n	7680.77	131388	542560	124771	141385	3.46182e+06	735492	340747	370625	1.29848e+06	3.02658e+06	354043	655147	41754	72541	638781	23046.6	1.35493e+06	16165.4	368527	1.57887e+06	692948	525462	734053	269056	542276	1.35319e+06	1.51553e+06	214901	2.54604e+06	49532.6	137561	199728	1.82696e+06	344583	171037	218667	318158	111330	792368	265810	455396	442561	472614	753169	309465	139871	24187.9	669928
5.31_184.0730m/z	30851.6	54409.1	68072.9	58335.1	44607	101747	70959.8	59289.8	63757.8	75125.7	100571	62242.7	68929.8	42515.4	47253.7	69297.4	44043.6	78789.2	35116.2	62065.9	76936.9	68152.4	60791.5	67177.5	65000.1	66450.3	76363.9	77321.4	56461.2	91206.8	42680.4	55486	52318.7	84010.6	61256.5	52777.6	58162.2	64743.4	55344.5	72325.6	53825.9	64392.1	62343.4	70727.6	66761.1	50145.6	52677.5	36585.6	68060.1
5.31_410.7619m/z	41093.1	80092.2	89506.1	74209.3	73205.5	162235	118374	90553.7	101638	126767	145191	101296	118825	64098.2	69155	115249	73513.1	140769	53141.8	92659.1	130246	115997	107272	122437	82016.6	105980	139403	119224	89762.7	143571	71780.2	66542.9	83703	143885	94240.2	78000.5	90703	83784	73399.5	117798	113007	99967.4	107557	109851	129044	107169	83311.6	53658.1	119128
5.31_781.5630n	1.70594e+06	3.26086e+06	4.45261e+06	2.87937e+06	2.73794e+06	8.79065e+06	4.76383e+06	3.80022e+06	3.67935e+06	5.83354e+06	7.79324e+06	3.75108e+06	4.69877e+06	2.31e+06	2.45986e+06	4.38625e+06	2.39778e+06	5.57179e+06	2.00699e+06	3.65748e+06	5.76877e+06	4.50154e+06	4.23381e+06	4.45943e+06	3.44982e+06	4.15903e+06	5.76481e+06	5.89945e+06	3.20652e+06	6.70563e+06	2.64972e+06	3.18373e+06	3.21524e+06	6.94287e+06	3.77121e+06	3.00649e+06	3.32359e+06	3.84083e+06	2.98234e+06	4.76672e+06	3.52491e+06	3.60588e+06	3.94955e+06	4.09153e+06	4.79067e+06	3.42894e+06	3.10132e+06	1.9061e+06	4.37275e+06
5.31_782.5704m/z	7.27554e+07	1.37218e+08	1.50865e+08	125608624	1.17326e+08	2.65612e+08	1.72485e+08	1.41959e+08	1.39706e+08	1.9412e+08	2.60958e+08	1.51945e+08	1.80769e+08	9.28258e+07	1.01853e+08	1.6506e+08	9.12646e+07	1.97074e+08	7.86817e+07	1.47326e+08	1.87425e+08	1.59514e+08	1.54276e+08	1.6343e+08	1.3508e+08	1.64983e+08	2.03772e+08	2.06891e+08	1.26133e+08	2.16075e+08	105009223	1.20701e+08	1.27638e+08	2.16948e+08	1.58682e+08	1.1905e+08	1.35533e+08	1.489e+08	1.17816e+08	1.79416e+08	1.31683e+08	1.42342e+08	1.4974e+08	1.71117e+08	1.67479e+08	1.32001e+08	1.22632e+08	7.22746e+07	1.60168e+08
5.31_782.7135m/z	79288.3	136803	204809	148809	124972	285294	200047	181405	220696	358791	430541	335490	363070	197427	162386	297676	129425	339482	110978	190839	258691	250193	178923	222176	188308	210326	176093	190498	116137	278973	137213	145431	162693	266709	139586	170787	200847	199742	227070	359442	277092	259859	257459	181383	257002	194197	124763	128043	181921
5.31_783.3872m/z	26397.3	57360.5	48178.3	35218	40351.4	80001.1	70534.5	44759.6	63252.2	70110.6	91503	92795.9	61517.5	83078	52231.3	51638.4	40781	75084.5	21610.7	27366.3	40486.9	38981.4	44880.1	63742.6	48390.3	30460.7	64205.1	47117.2	18663.5	58366.9	62318.2	43766.7	41126.3	50582.6	33801.3	45482.5	59054.4	75050.9	53605.9	62732.1	64444.6	74476.3	70529.7	74833.3	65264	42947	46370.3	33374.4	61350.1
5.31_840.6231m/z	82404.6	176070	240459	169836	156794	414816	276240	225430	212146	327703	392162	221850	276810	127256	131040	275287	128563	328826	96445.1	226130	338280	300053	277427	305305	208713	273307	365762	356020	199417	393084	143421	183398	187330	345862	224051	168874	196007	204107	162335	285012	199093	219117	227164	242905	290610	190171	184808	81209.6	277266
5.31_866.5281m/z	270110	360365	422997	375356	330411	604845	484560	417328	396816	510284	582481	419724	496920	350588	334892	456143	359098	500932	289055	409472	501564	462660	448313	462165	410791	423919	501334	483367	412309	542072	346898	375245	391632	508318	441474	395097	392976	373203	384246	507406	397775	394558	408294	490051	449002	402723	389081	326815	448766
5.31_966.5424m/z	30302.6	40000.8	56598.6	39511.5	39543.2	98464.4	71569.2	41334.7	51821.5	61745.4	82450.8	64622.6	62679.7	38658.4	36354.1	62326.8	34099.8	67029.7	27400.2	54704	65317.8	54398.9	54156.3	63861.5	40516.3	57962.9	68132.1	65663.4	45963.7	77130.1	40650.3	40342.7	51725.6	70113.9	52671.2	53005.9	46469.2	62893.9	39559.3	72240.1	40600.4	44873.4	53380.8	67828.5	62900.1	54706.4	36833.8	33136.4	57890.1
5.31_975.5929n	358402	845429	1.1775e+06	713601	681135	2.66547e+06	1.3535e+06	994768	1.01268e+06	1.6534e+06	2.4017e+06	1.05958e+06	1.28999e+06	488337	545142	1.23247e+06	546571	1.75726e+06	371831	1.00425e+06	1.7003e+06	1.27029e+06	1.16552e+06	1.34202e+06	874453	1.20836e+06	1.71354e+06	1.7796e+06	807355	2.09844e+06	624464	758712	831889	1.99768e+06	1.02891e+06	731364	895515	987462	692208	1.36979e+06	931153	969518	1.00082e+06	1.16004e+06	1.29628e+06	887011	745968	342075	1.26113e+06
5.32_856.4946m/z	8688.19	11927.8	14876.2	9515.97	12415.7	20702.6	15168.3	14546.6	9551.87	23081.4	23061.7	17495.4	19454.2	13493.2	14035.2	16818.1	10591.9	22639.5	8274.19	15574.8	16317.7	16769.8	10862	11002.6	7894.62	11481	10865.8	12152.4	13389.7	11576.1	12655.5	12381	15188.5	14273.3	14414	10174.5	18781.2	12193.1	16571.8	17771.9	11078.8	16815	13211.6	14639.7	17029.3	10972.8	10858.5	6762.11	15939.8
5.36_613.5188m/z	42886.7	51133.2	82862.2	110533	62217.4	44820.6	65438.7	49283.3	27048.6	87504.6	133385	53471	71645.1	73845.1	55396.7	51344.9	55761.4	56260.9	65262.9	71855.9	74434.5	74496.5	95853.5	51725.7	110372	58065.7	47380.5	48660.4	58061.4	96552.6	47720.8	53685.9	39424.7	74230.7	167495	66134.5	32290	79875	66011.4	117404	38583.5	77217.8	65297.2	87211.7	45291.1	44602.8	75936.7	54737.4	70564.7
5.37_890.5733m/z	96456.7	114801	169181	201838	115018	111089	130833	95429.9	78517.3	180536	250950	135559	154902	164820	127527	101623	115237	127294	123688	147612	113845	150484	204500	109423	220269	126795	116384	113784	119757	180121	115266	121617	82362.8	135039	300875	135033	73058.6	163527	136099	236773	100552	162530	146183	191022	109468	117776	145462	126184	135471
5.39_627.5335m/z	11147.4	16747.2	17572.2	35616	20570	22128.5	29885.5	21377.4	9827.78	26032.7	56594.9	19693.2	55536.5	17789.2	19442.7	24412	13960	31144.1	16060.8	34067.1	38065.6	25876.1	22995	27863.4	20791.9	13627.3	25290.9	18340.7	15517	36420.4	11824.4	26295.1	10640.5	27422.1	38253.3	20989.3	16607.5	17571.6	13924	20243.6	21821.8	20039.3	22087.4	25839.3	21897.6	11680.6	19848	12761.5	18712.6
5.39_782.8372m/z	121456	174828	257823	152322	160164	428995	252138	241170	244356	315432	426645	236650	208554	155458	166914	213833	159079	290662	158741	209823	254482	175510	183169	231102	202641	184005	226859	263745	208486	320688	175581	208965	188233	337652	198547	183039	237180	209638	199317	257426	194339	204299	231850	242009	236071	178729	177177	149686	221141
5.42_832.5849m/z	2.00601e+06	3.23351e+06	2.87452e+06	3.0729e+06	1.40908e+06	2.12949e+06	2.67129e+06	1.82602e+06	1.84329e+06	2.33684e+06	3.50399e+06	1.93996e+06	3.56968e+06	1.91119e+06	2.60787e+06	2.43153e+06	1.38984e+06	2.17904e+06	1.97627e+06	2.29889e+06	2.73329e+06	2.73706e+06	2.21992e+06	1.77206e+06	2.69487e+06	1.95947e+06	2.50984e+06	4.10242e+06	1.99493e+06	2.49712e+06	1.65704e+06	2.69188e+06	1.39501e+06	3.44266e+06	3.00017e+06	1.94483e+06	1.31938e+06	3.90849e+06	2.14105e+06	2.98157e+06	1.44028e+06	2.66893e+06	2.81569e+06	2.45242e+06	1.87724e+06	1.62274e+06	3.30679e+06	1.74342e+06	1.50638e+06
5.48_636.4935m/z	108844	116717	161508	143811	153053	140193	114406	108431	100502	123212	111968	108837	159524	118134	127895	134862	106033	121194	136719	120999	131329	124091	121149	116895	121141	115438	96537.3	149166	135611	129231	110298	152944	98618.5	129550	94315.7	91972.3	100544	123995	101941	141701	113517	99471.1	114907	133690	97741.1	119423	111251	79609.1	104913
5.50_368.3887m/z	31616.5	18648.2	16807.3	11475.8	12744.6	17248.8	22395.5	26186.4	28035.5	21026.2	39893.2	63767.1	12033.9	68971.6	113543	76897	57939.8	38510.7	93051	126356	45106	89095.4	82370.6	51027.6	60984.1	47451.8	122972	127539	95818.9	42600.3	23592.7	19922.9	21873.3	21383.2	24189.1	31290.5	33378.9	48986.1	20156.9	45983.4	41753.3	49730.4	32053.2	84778.7	61992.2	87713	31910.6	28149.2	35919.3
5.54_938.5816m/z	64878.7	81749.8	84922.4	95131.5	63538.2	93961.3	81677.6	100691	52886	120857	155247	88942.5	99002.8	105959	92354.5	99698.4	95679.9	84245.1	69636.9	56092.7	92063.2	89490.8	107850	94112.8	146126	106603	119737	122320	121042	105286	95002	83742.6	72219.8	88125.8	84500.4	95851.1	88373.1	97028.6	112750	140071	78667.8	86827.1	95103.4	108475	70534.9	80690	98783	79284.4	89641.2
5.55_589.5180m/z	22430.6	31432.3	46683.1	64743.8	21693.6	37924.6	36311.8	17986.1	16662.6	45273.2	46985.2	28412.4	30300.1	29616.1	19063.6	24853	30362.9	29076.5	13857.7	29003.4	21927	29140.9	36305.8	20769.3	51760.1	22732.3	25796	13218.5	16553.4	36364.7	24843.2	47225.9	26695.7	40772	77210.6	31722.9	17211.8	28006.7	25192.1	53884.1	21350.3	28999	24080.4	59814.9	14687	24556.1	19761.1	26029.2	31742.5
5.55_744.5551m/z	6.00421e+06	1.24278e+07	1.68954e+07	1.0943e+07	5.44202e+06	1.46725e+07	1.15638e+07	1.17875e+07	7.81813e+06	1.79315e+07	1.98367e+07	8.14927e+06	9.51991e+06	1.51725e+07	8.80578e+06	1.10657e+07	9.34673e+06	8.59171e+06	8.74523e+06	9.77099e+06	1.08197e+07	1.11874e+07	1.44698e+07	1.06681e+07	1.68674e+07	1.24032e+07	1.03792e+07	1.35886e+07	13889987	1.30019e+07	1.24755e+07	1.15188e+07	1.05996e+07	1.24276e+07	1.04288e+07	1.49441e+07	1.07407e+07	1.11723e+07	1.03448e+07	1.97393e+07	1.00303e+07	1.5093e+07	1.31443e+07	1.52532e+07	8.60905e+06	1.24776e+07	1.26275e+07	1.04956e+07	1.2606e+07
5.59_510.4500m/z	25996	18663.1	19380.9	23569	23034.7	27231.1	23698.3	28153.1	12454	17890.4	23747.3	28556.3	23055.2	23866.3	26010.7	20272.6	20911.9	22270.9	38787.8	23604.7	20066.4	25317.2	25267.9	26442	21943.2	27691.8	17404.1	19783.2	25221	23623.3	25234.5	25717.9	33488.7	19857.6	16174.1	24863.3	24810.5	20465.1	21352.4	13419.4	20665.7	21634.3	19123.2	22592.9	21066.1	26327.8	26940.2	25820.1	17391.6
5.61_670.4572m/z	19916.9	13218	11045.1	18117.5	24819.9	18902.8	21713.8	23156	21300.9	17208.3	18675.3	28325.9	19648.5	23792.6	17649.5	21296.6	22913.3	20446.8	21765.4	20677.6	16720.3	15737.6	19862	18956.7	14169.7	19841.1	18771.5	18058.2	16954.8	21343.9	17609.2	12531.8	25718	16738.3	16896.2	18743.1	25029.2	18872.2	21288.7	20799.4	20954.4	15771.3	15481.2	17562.7	16509.9	11901	15716.8	26434.5	20617
5.63_627.5252m/z	145798	172071	111194	279660	225589	162089	174296	146976	129181	216784	252251	223697	179637	183617	165896	160388	138660	176962	149754	182627	171760	189531	162835	145261	212082	177708	153337	171319	129946	148388	103953	128820	151968	225729	313662	140988	136850	249332	169458	199752	144473	178619	149340	200524	136916	139645	145356	161466	142071
5.66_933.5466m/z	24957.7	45692.9	40163.9	74325.5	81715.2	51682.5	69392.5	54756.2	51132.4	61000.9	67368.7	60910.8	36832.8	69791.3	40416	57476.3	64274.6	54327.3	68933.2	45621.3	53481.3	48912.5	34187.8	32392.4	73758.6	78024.8	55922	27177	36617.1	39308.2	39970.6	51191.8	51474.6	71472.4	61163.9	36503.8	61640.9	72023.7	86660.4	51856.8	32729.9	47744.1	52475.7	59808.4	34049.2	55056.7	47191.3	52919.8	65573.7
5.69_651.5354m/z	608389	472826	572174	815878	634931	439714	633876	480076	392531	530299	538552	594624	484337	480290	435891	411919	731948	459494	585341	576795	371870	515686	477882	359859	637144	568202	407591	266988	434439	449591	482468	729307	451928	492031	502769	361463	299407	474929	648805	459781	320722	426765	403519	485155	341559	408823	437746	385197	501976
5.70_928.5929m/z	833071	654506	794174	1.15195e+06	878084	607935	874086	645730	533941	723983	712828	840339	615622	644236	593708	547177	1.03205e+06	627461	820621	793700	513539	725219	715451	487732	929682	827639	579814	368284	595658	609941	686708	996249	637150	658048	675176	503510	410860	625722	854146	605905	431486	573220	559847	669850	465743	560951	595472	545169	713203
5.72_124.9995m/z	9496.3	10689.5	13114.5	9944.57	13072.9	14476	6965.07	8779.87	12112.1	14889.1	16439.2	11310.3	9842.87	12411.5	11883.3	9997.19	13152.8	12345.9	12275.5	8957.35	13241.4	6261.19	11256.2	8516.41	11356.6	10462.1	7149.12	9414.09	6733.01	12383.8	9885.91	9645.06	8790.02	8534.61	9349.64	12614.8	11070.9	14688	9504.84	13803.5	9080.49	12950.4	11150.5	16209.1	12550.7	14394.3	13157.4	10471.8	10733.7
5.73_685.5631m/z	3.17312e+06	3.04049e+06	2.57733e+06	2.73671e+06	3.08762e+06	3.09625e+06	2.90023e+06	3.08163e+06	3.14132e+06	2.97884e+06	2.82107e+06	3.05484e+06	3.13722e+06	3.11289e+06	3.00908e+06	2.9504e+06	3.10069e+06	3.01661e+06	3.16742e+06	3.13635e+06	3.03427e+06	2.99349e+06	2.91231e+06	3.20162e+06	2.91881e+06	3.08906e+06	2.91709e+06	3.00407e+06	3.04201e+06	2.89591e+06	2.97152e+06	2.91302e+06	3.07328e+06	2.80149e+06	2.85905e+06	2.97873e+06	3.16804e+06	2.75705e+06	2.85962e+06	3.04764e+06	3.15766e+06	2.75022e+06	2.92827e+06	3.0007e+06	3.05163e+06	3.05247e+06	2.86072e+06	3.29938e+06	3.14441e+06
5.74_787.5289m/z	465559	524169	474888	480418	462546	558142	490749	520851	531751	515401	502864	501516	504093	492074	502898	473703	548147	543425	478626	485809	533458	473413	476656	500797	457753	493479	463338	530873	529293	534626	497518	473510	475846	477663	488267	561632	533057	501714	449034	503636	487287	469298	500709	535135	489508	535513	493913	542846	471159
5.74_907.4713m/z	75574.8	86415.7	73024.8	84409.5	89826.4	94725.8	94787.5	100623	99551.8	93064.1	88264.5	119402	105769	98092.3	106837	118649	107139	80612	91308.1	87473.3	87366.8	94242.2	91146.1	76536	76991.3	98171.7	75751.2	93088.5	78254.4	83247	94637.2	78351.1	94001.5	98545.3	101323	89813.4	101965	97906.7	98910.5	99064.9	100205	91449.8	93116.9	96863.4	115175	103473	79913.3	95215.9	96140.6
5.76_1026.6127m/z	130035	131415	214065	213079	88652.6	136886	122947	147477	128299	133605	208508	103528	235204	129840	149062	105250	160065	130817	148828	137656	97063.3	137473	130319	125023	126078	105905	118526	92219.7	170752	183388	133355	220904	102264	157914	173944	182297	97284.8	140581	132407	138775	140415	185410	215009	151798	117297	142449	151459	108803	106454
5.76_762.6290m/z	15389.1	11905.1	9118.18	18995.8	10021.2	20756.5	19790.1	22998.9	17560.3	13053.9	10425.4	15730.6	20660.6	14037.5	16872.1	20661.4	29400.7	21421.2	19202.9	16204	14210.5	14040.1	17963.5	16495.6	14274.8	14332.3	21262.5	18124.6	13969.7	15232.2	24966.5	18266.7	17661.5	15806.7	17776.6	19173.1	20975.1	18191.1	13957.5	16923	19056.2	21525.4	19031.9	7780	20915.5	16826.8	20676.7	17446.5	18356
5.76_872.5752n	242735	223955	375388	310642	172835	274128	283892	267889	209854	268683	311689	220894	416824	204012	270181	216920	226768	228719	258519	268512	262659	300045	243602	211640	217982	189452	255262	189871	287996	292666	257984	410062	154845	322939	263795	277362	165252	239191	250895	243877	221308	292729	319400	254712	200471	219697	251003	185240	159092
5.77_796.5077m/z	22617	25373.6	31474.4	36166.8	16919.5	22802.2	21250.6	35444.5	15447.1	24545.9	37076.2	30577	18246.6	19659.8	21475.4	20365.9	17179.8	16370.5	16382.1	25894.3	20955.7	18893.7	24883.1	15402.2	23216.7	24902.7	11978.9	20006.6	20375.7	26379.2	20013.1	33524.9	16346	29698.8	24484.6	21681.9	15785.9	36573.8	20193.8	21681.2	17438.8	29544.6	22609.9	29512.8	15431.1	10893.5	23020.2	23063.2	16526.3
5.79_832.5864m/z	1.15876e+07	1.25159e+07	2.23414e+07	1.53936e+07	8.49683e+06	1.27877e+07	1.49371e+07	1.2752e+07	9.32348e+06	1.12191e+07	1.58029e+07	9.34572e+06	2.28741e+07	1.11588e+07	1.3219e+07	1.04095e+07	1.09091e+07	1.06841e+07	1.43165e+07	1.49139e+07	1.35368e+07	1.57143e+07	1.24167e+07	9.86739e+06	1.04643e+07	7.83189e+06	1.38948e+07	8.96903e+06	1.50056e+07	1.47705e+07	1.3176e+07	2.09183e+07	7.84823e+06	1.59954e+07	1.47728e+07	1.45221e+07	6.36567e+06	1.11781e+07	1.26715e+07	1.2695e+07	1.08203e+07	1.42855e+07	1.86663e+07	1.34836e+07	1.02306e+07	1.11981e+07	1.33678e+07	8.66062e+06	7.93217e+06
5.80_550.4176m/z	125397	114311	189856	72296.8	122258	137830	131011	99210.3	159659	101564	84111.9	163706	100340	93364.5	171516	145818	100037	98458.8	88358.1	109056	93065	149302	253602	107347	83090.1	173553	101445	126245	97867.4	121429	111777	83319.6	141788	153119	95064.3	95817.5	126724	120912	167117	180236	121035	99458.6	114249	107624	80552.8	146374	113422	95044.9	162906
5.83_640.5143m/z	41155.9	30841.3	46168.6	39474.7	42086.8	39551.1	46538.5	41282.3	42071.1	38676.2	44754.6	38556	43398.7	36821.9	42584.1	43637.5	40414.2	44927.4	47572	40242.4	40046.1	42374	42308.6	47438.8	48140.7	45436.8	40710.4	37083.1	31962	46286.4	37834.6	46972.3	43127.4	44604.3	44556.7	33112.2	43649.8	42314.6	41733.8	40913.6	37173.1	40395.5	39645.9	33706.6	42992.3	44423.5	37866.7	41499.4	46174.7
5.83_858.6018m/z	530459	899867	736600	819474	471424	529616	592480	531096	472300	607177	752158	452358	700095	671102	767217	658408	389547	641710	505414	472907	1.06689e+06	655425	564099	419037	617720	388125	509488	658688	542206	654421	340552	710013	296940	796232	590588	548783	284831	917523	481000	635945	380123	811142	741517	554511	528265	423773	750697	484685	426580
5.90_410.4360m/z	269148	202676	209973	202827	240812	311042	310304	266396	324542	268944	421372	820430	260005	966199	1.20524e+06	743366	730813	501750	861016	823586	382727	684110	642003	483787	641292	339482	709289	695054	544912	377123	273994	285690	217168	270263	292144	256543	258666	511706	350193	582823	633075	645308	357561	879956	860324	999694	381247	354202	290202
5.95_796.5842m/z	35099.6	47367	57931.1	44884.3	38673.5	103803	96712.1	61439.8	56698.7	76880.7	107046	62457.5	68700.8	33650.8	42338.7	49303.1	25460	43923.1	30297.6	47482	74922.4	83075.6	73255.1	63865.6	47698.3	47001.5	81648.4	60936.8	36595.3	80632.6	27914.3	86123.9	35897.7	82416.4	85087.1	63744.4	61716.5	62154.5	38869.4	83304.1	28400.2	55639.9	65944.6	64816	40694.2	40491.5	44185	37553.1	124413
6.00_858.6016m/z	254259	258934	388490	288109	195071	375782	509107	321759	250878	299475	308623	258424	541149	275907	345601	248427	238961	268710	213980	305362	258412	480863	165349	259562	219639	125359	385503	163738	207819	227024	239926	573884	237935	447066	348912	308613	241923	158955	278397	331709	244223	258993	354654	331143	195869	237709	232095	133664	196348
6.01_338.3779m/z	70237.5	30019.5	27663.9	20120.4	58131.8	107934	105123	112324	186090	121037	322455	747797	172133	787281	900727	425001	344457	219539	291997	338879	87494.5	211271	214855	108797	179248	44193.6	276763	271704	77255.5	127667	42238.2	33105.3	70074.4	89271.6	111869	118894	137039	337357	239763	443918	573965	441057	154882	561805	397344	567257	90110.6	70781.4	81192.6
6.02_934.4973m/z	516600	530230	436472	421059	486271	506192	516456	517599	495503	455448	490212	533431	529756	475163	507117	479141	526639	551312	475208	524997	458995	493260	461250	460118	503856	516567	494985	490275	501162	429049	523148	436669	513755	470230	517215	491300	498049	486685	488012	498767	486206	456348	495546	540935	492875	498509	478347	489468	477398
6.04_479.3311m/z	65407.3	62491.8	46447.6	42425.7	66730.3	52644.4	57881.4	51704.5	60101.7	54530.6	42380	66827.9	60669.8	41111.9	53188.9	48959.1	50725.4	52302.8	63489.2	52105.4	46828.9	62881.9	53292.1	55157.3	56366.6	53778.3	56483.3	51205	58639.5	48773.2	61146.4	50605	60265.1	44262.5	55634.9	49847.1	57290.9	40185.8	48524.8	52406.5	60090.1	40852.4	52879.9	53978.1	69345.9	57796.1	59987.2	62493.6	57438.3
6.07_1669.1158m/z	3.5124e+06	3.25067e+06	6.04757e+06	5.11646e+06	2.27932e+06	2.32646e+06	3.45778e+06	2.55157e+06	1.45863e+06	4.4657e+06	3.87993e+06	1.98466e+06	3.15161e+06	3.98112e+06	3.3532e+06	3.00758e+06	3.59288e+06	3.44794e+06	2.50942e+06	2.17187e+06	4.0183e+06	3.31075e+06	3.58112e+06	2.20383e+06	3.70145e+06	2.21318e+06	2.05698e+06	2.42505e+06	3.40165e+06	5.58768e+06	2.47832e+06	3.84182e+06	1.79235e+06	4.22214e+06	3.15849e+06	3.81499e+06	1.05379e+06	4.56295e+06	3.91636e+06	3.77573e+06	1.97586e+06	5.97642e+06	4.05186e+06	2.67903e+06	3.29069e+06	1.93155e+06	4.78793e+06	2.29773e+06	2.88726e+06
6.07_341.3051m/z	72548	63503.8	91316.8	82140.8	76968.3	58783.3	67661.5	56739.3	42429.7	83165.8	55644.2	50536.1	56279.1	53050.2	51188.7	50116.5	67334.2	66058.4	52120.4	50923.1	62370.9	59246	63095.6	60411.6	63975.9	54508.2	52836.8	47390.2	70830.8	80880	64694.7	75498	55159.2	88447.9	61717.1	63069.1	40158.9	53645.2	69862.8	64626	51769	69317.2	51701.1	55164.7	49538.5	46635.9	64708	46748.7	54214.7
6.07_627.5365m/z	7.54462e+06	6.70581e+06	1.07644e+07	9.40558e+06	7.17289e+06	5.88488e+06	7.81478e+06	6.00057e+06	3.98975e+06	1.08002e+07	7.28601e+06	6.01564e+06	7.16161e+06	7.35785e+06	6.33105e+06	6.64774e+06	8.8384e+06	7.42096e+06	6.31446e+06	6.00439e+06	8.14547e+06	7.40076e+06	7.69211e+06	6.13867e+06	7.53566e+06	5.7449e+06	5.61285e+06	4.57862e+06	6.8007e+06	9.69576e+06	5.99532e+06	7.72534e+06	5.14205e+06	9.69908e+06	6.63692e+06	7.21943e+06	3.96526e+06	7.47065e+06	8.85827e+06	8.44654e+06	6.10889e+06	1.00982e+07	7.29897e+06	6.65389e+06	6.662e+06	5.46696e+06	9.41887e+06	5.61432e+06	7.18777e+06
6.07_627.7843m/z	7395.54	542.774	22883.1	18205.4	7856.7	2568.33	23598.1	5774.73	462.456	40325.3	14195.7	3033.66	7246.79	8756.28	6708.02	5310.02	14300.6	6221.47	1105.38	428.154	7764.29	5842.74	9760.47	1485.77	8860.39	53.4396	580.608	2206.6	3397.5	34428.8	1160.68	4690.77	698.112	54948.7	12733.4	8345.18	652.416	13711.9	20050.8	17098.1	3822.13	36810.9	8731.27	3985.44	2955.43	446.352	8847.43	3670.22	2321.72
6.07_886.5600n	1.23235e+07	1.10897e+07	1.59776e+07	1.36463e+07	1.29865e+07	1.03224e+07	1.31839e+07	1.06814e+07	7.1212e+06	1.8577e+07	1.20531e+07	1.06899e+07	1.25956e+07	1.21689e+07	1.06912e+07	1.1718e+07	1.574e+07	1.30772e+07	1.11169e+07	1.10208e+07	1.33275e+07	1.24101e+07	1.28906e+07	1.09332e+07	1.23787e+07	1.01285e+07	1.03404e+07	7.56882e+06	1.13406e+07	1.57546e+07	9.97227e+06	1.2407e+07	9.04777e+06	1.65033e+07	1.08159e+07	1.23839e+07	7.37505e+06	1.1613e+07	1.56087e+07	1.4322e+07	1.12931e+07	1.57543e+07	1.15872e+07	1.13146e+07	1.08702e+07	1.00538e+07	1.51356e+07	9.90542e+06	1.30245e+07
6.08_1791.1257m/z	257577	97259	594274	408745	405020	113012	253273	106145	24387.1	1.03368e+06	258234	244189	276079	327025	156794	224299	650608	291895	145621	142569	265232	171896	357019	171795	241772	63916.7	98199.3	10277.3	233499	551146	83103.7	188468	62210	664113	121606	194227	50234.8	168713	701293	494370	284025	572436	118860	246124	76153.8	102930	358303	51625	294599
6.09_925.5132m/z	168151	149179	131187	164811	240767	187325	219604	157096	140745	263402	185171	235486	218463	171690	152303	173518	234028	205816	182224	213696	159588	179009	208474	191512	162949	202669	195185	145058	197469	192861	141682	131064	192547	229662	178051	183859	192857	150075	234597	192363	256766	179750	169170	228370	137006	185342	198352	179568	229627
6.11_931.5271m/z	226510	197949	168924	177240	222702	194606	188212	189443	158386	262261	157402	217792	213963	175696	182073	198382	262225	199478	175370	207026	168394	190461	192275	207703	166179	201707	194911	139524	155732	163140	162058	218081	198142	249756	189659	163128	181224	133061	234444	206011	215658	170960	133112	191942	121227	175844	217012	196002	226499
6.12_621.4887m/z	201455	171977	124094	111731	180695	176034	182244	179683	161948	147366	146880	167774	141194	143488	149399	137895	150653	150220	142764	181427	138896	157597	170419	184278	162483	174083	171209	171638	159159	146031	216207	133289	195096	158106	168858	153400	154730	126455	169580	148260	161963	114377	161359	142223	155272	150416	118102	156312	143867
6.18_569.3863m/z	21526.6	23760.1	25091.6	10281.4	34223.2	21817.6	25413.4	25876.4	30213.6	25052	16546.2	26130.2	24865.1	24589	20197.8	17004	28208.4	19262.7	25592.1	23563.3	15132	23291.4	24103.5	30445.5	19652.4	27427.9	25456.9	24382.5	19147.9	19119.1	17716.9	18005	24424.4	20067.6	18266	19078	25912.8	20056.3	20850.1	26033.3	33126	20900.8	20845.9	22103.1	16400.1	26281.6	21617.6	25927.7	21573.6
6.18_818.5266m/z	13418.5	20093.1	15028.2	11055	14735.3	16353.9	21711	27302.1	8616	21095.7	21719.6	15062.4	23024.6	11592.4	11142.4	9210.59	9648.34	13609.9	20611.3	19707	13479.1	8751.21	13262.6	17616.4	16073.3	12553.5	11579.9	16085.9	15104.8	7460.61	13776.9	21170.1	13417.3	13434.3	10540.8	10816.1	12204.6	21284.2	16231.4	16345.5	15500	18131.2	20322.4	13376.1	14892.3	15126.2	10150.4	18304.8	13713.8
6.19_649.5132m/z	24703.2	21273.5	31477.9	32322.7	24628.6	14084.3	29884.8	23309.9	15355.2	28186.6	23305.4	18339.9	23936.7	12695	15883.1	19687.5	13623.2	19118.2	27231.9	27203	20597.8	21582.6	18934.7	13284.2	24792.6	18566.3	23262.6	18647.4	29039	26093.9	27976.4	60691.6	16457.2	23724	22335.2	11120.3	10990.5	35258.9	22492.2	18233.5	20337.5	32204.6	29231.2	12016.1	17055.4	17431	22557.1	18484.9	17616.5
6.21_535.4283m/z	61929.9	71618.9	48022.8	47249	72384.9	68358.5	66135	67376.6	62579.1	51246.4	49847.1	63609.6	56978.6	59462.2	57440.7	63028.3	71942.5	55877.3	65716.2	62071.8	51654.6	51948	54227.3	67019.8	50755.5	63185.6	74757.3	83028.9	56634.5	55322.6	76971.9	56991.8	72204.8	61075.4	63128.5	60761.6	72240.5	43152.4	55466.3	57509.8	70161.7	51479.6	44695.9	56626	61917.7	78692.8	50685.6	63767.8	65457
6.21_717.5912m/z	312780	673791	703318	541855	165891	519538	321215	704355	346961	628449	590724	193845	396225	746847	366010	389847	598263	353525	429838	351413	647134	243765	816344	528163	244791	362753	323145	450281	646232	1.00635e+06	516823	314949	225184	248292	334748	709180	394555	309983	229921	893550	555191	332415	622987	537348	333425	625018	722327	830244	475209
6.23_540.5356m/z	75217.7	58450.5	40562.4	47835.3	91660.5	71567.5	59431.8	86754	102829	66850.8	64211.6	117464	83425.3	100804	119203	132650	115610	80820	115882	126087	75521.9	79384.5	80633.7	81336.2	76206.3	85310	98943.4	86460.4	74032.3	47089.4	66649.8	72242	93908.6	47035.6	77380.8	69691.5	102039	71460	79129.2	80589.3	109595	83421.8	72626.8	112223	91761.8	134208	72245.1	74882.6	97282.9
6.23_637.5077m/z	72329	55858	49387.2	51221.1	97553.3	72658.2	74507.1	89141.9	73474.9	65727.5	58022.9	86840.2	84580.1	89682.4	78176.3	78632.4	79763.9	71066.2	88863.3	91700.7	63405.1	84476.2	86480.2	101932	81301.7	92285.1	89943.6	92219.7	82590.4	76295.3	58998	58726	73120.6	42359.3	46271.1	73676.7	78350	61721.9	78272.6	63376.8	85640.9	55711	72742.6	62470.1	72635.3	98058.7	62943.9	87026.6	80929.6
6.24_916.5355m/z	34867.4	26916.5	17625.8	22189.6	25137.3	24667.4	22643.5	26608.7	26885	37948	26132.1	28310.2	28815.8	32025.8	28802.3	31278.3	22451.2	32057.7	27475.4	32691.9	24804.5	25386.4	32635.8	31938.3	26237.4	25097.2	34159.6	27974.8	34188.6	18859.7	15994.7	27807.5	22329	28265.7	35066.4	21295.8	16246.6	30168.3	25032.5	21435.5	34312.6	18806.1	30557	32276.7	25092	37561.6	25936.5	24874	26899.5
6.24_962.4982m/z	83056.6	104056	100713	75725.8	92448.4	84610.4	79720.6	93240.3	98676.6	91470.2	121631	92527.3	107009	111098	107929	107676	114198	99382.7	96847.7	109791	93837.1	88527	75547.3	121342	74203.5	92143.9	93047.9	102193	88262.8	83551.1	106359	83066.4	109294	113659	80774.4	85985.7	90474.6	76706.6	114125	119371	111683	110837	106141	94654.7	92223.4	90341.3	97271	101860	107987
6.25_368.3892m/z	170814	116735	87821	84720.9	118640	107365	129898	141921	187370	137311	239944	348232	173806	411233	539259	395040	324508	231114	386592	450658	167664	324533	303277	258977	343286	165842	340602	430911	273583	144394	121179	138736	144706	140666	184104	131987	194408	269088	173195	297286	305229	283422	211859	360294	359620	545025	177673	167371	173638
6.26_1185.8287m/z	15798.1	30344	23396.8	35319.6	26368.2	10621.3	31641.5	18498.7	29743.4	16018	20649.3	9319.87	21130.2	9900.08	17432.4	16525.2	12821.3	6243.39	9708.13	8282.72	13573.5	6964.28	19223.5	19795	4193.07	18000.8	3509.53	7157.14	16027.4	7939.27	17147.1	20592.8	15022.6	20312.7	30440.6	23450.2	5063.8	14033.5	17416.7	14830.7	8245.23	27339.9	22874.2	12827.5	18175.6	9268.86	14712.3	10877.1	10331.4
6.27_880.5934m/z	1.45083e+06	1.53716e+06	1.69682e+06	2.14336e+06	2.13114e+06	1.42432e+06	2.33477e+06	1.51484e+06	1.25257e+06	1.7558e+06	1.52835e+06	2.32968e+06	2.16297e+06	1.72807e+06	1.48693e+06	1.68892e+06	2.04869e+06	1.77819e+06	1.37248e+06	1.73696e+06	1.33778e+06	1.7547e+06	1.64175e+06	1.56642e+06	2.01987e+06	1.73841e+06	1.93478e+06	1.09838e+06	1.00928e+06	1.57884e+06	1.5076e+06	2.69882e+06	1.65217e+06	1.79219e+06	2.19147e+06	1.42555e+06	1.37032e+06	1.23953e+06	1.69422e+06	1.62892e+06	1.28295e+06	1.53015e+06	1.52957e+06	2.55367e+06	1.39878e+06	1.88253e+06	1.25144e+06	1.74835e+06	1.72047e+06
6.29_1621.1189m/z	468310	973408	1.70583e+06	1.90748e+06	986361	1.50422e+06	1.73101e+06	911928	465745	1.57388e+06	1.07451e+06	1.48524e+06	1.1889e+06	933928	915517	833008	1.52379e+06	1.1583e+06	645747	1.08213e+06	987835	1.30762e+06	1.07865e+06	1.13136e+06	1.68582e+06	1.17771e+06	1.46048e+06	579896	736405	1.37077e+06	802479	2.51825e+06	892439	1.59809e+06	1.22514e+06	904200	680090	852958	965575	1.23989e+06	693941	1.13376e+06	838777	1.8302e+06	709028	804458	804280	988300	1.13093e+06
6.29_603.5366m/z	1.68729e+06	2.23272e+06	3.58105e+06	3.92181e+06	2.41139e+06	3.4803e+06	3.46933e+06	2.06591e+06	1.54571e+06	3.35928e+06	2.7756e+06	2.62679e+06	2.81168e+06	2.10486e+06	2.16437e+06	2.3693e+06	2.99374e+06	2.7079e+06	1.7109e+06	2.33671e+06	2.43593e+06	2.65273e+06	2.51699e+06	2.37865e+06	3.19518e+06	2.63316e+06	2.86931e+06	1.61725e+06	1.81541e+06	2.91525e+06	2.10277e+06	4.6917e+06	1.94337e+06	3.48296e+06	2.68887e+06	2.29797e+06	1.91131e+06	2.0985e+06	2.31891e+06	2.7731e+06	1.85596e+06	2.78628e+06	2.24261e+06	3.64207e+06	2.1687e+06	2.15021e+06	1.95334e+06	2.05039e+06	2.64111e+06
6.29_863.5660m/z	301382	359364	476476	567716	392949	372750	591799	336248	269314	463266	353873	453097	384199	371908	367141	358750	475825	389411	274260	383278	332013	439160	385760	371553	527751	414449	475256	235493	268076	421802	373335	706940	335128	471200	463731	342829	318342	310643	392225	398464	285685	374490	348992	574409	291563	376347	293246	354569	401634
6.30_184.0736m/z	619746	694013	760584	680193	627513	906704	733646	688850	698695	777187	765987	660707	750646	670850	699681	735580	715656	755846	651693	664658	732498	701151	701039	697889	679874	684058	697820	658632	711107	762253	671189	754598	642187	764657	657774	745695	714425	728467	696397	758741	725465	752132	744303	710345	734296	661447	737437	641363	719712
6.30_1948.8542m/z	18144.4	18895.8	17887	22161.5	21583	30293.1	34153.9	29802.7	16312.1	17549.9	25978.1	30568.8	42932.7	13520.3	15944.6	15870.5	33443.9	42413.5	17976.5	26863.6	11760.6	15056.2	26547.8	14126.5	14072.6	14958.4	15947.1	14259.1	15747.4	18757.4	21435.6	57580.3	19582.8	18857.4	14659.3	18083.7	16658.3	14745.8	29141.5	26399.1	17221.6	36601.4	13530.7	24374.2	17681.5	17992.4	13703.8	17554.9	12306.4
6.31_1156.3293m/z	1.26436e+06	1.54981e+06	1.52053e+06	1.39196e+06	1.39416e+06	1.88003e+06	1.52594e+06	1.45806e+06	1.54399e+06	1.56687e+06	1.59681e+06	1.43791e+06	1.34966e+06	1.27736e+06	1.50095e+06	1.52191e+06	1.52315e+06	1.57198e+06	1.41719e+06	1.55209e+06	1.57069e+06	1.61971e+06	1.60844e+06	1.66472e+06	1.49461e+06	1.62235e+06	1.59244e+06	1.39622e+06	1.56301e+06	1.4857e+06	1.55146e+06	1.55173e+06	1.50122e+06	1.55056e+06	1.36033e+06	1.62503e+06	1.62348e+06	1.58028e+06	1.54403e+06	1.54692e+06	1.61135e+06	1.43848e+06	1.50232e+06	1.53265e+06	1.57347e+06	1.27511e+06	1.64153e+06	1.38426e+06	1.65321e+06
6.31_1156.8310m/z	1.21627e+06	1.53964e+06	1.43819e+06	1.29911e+06	1.30045e+06	1.70718e+06	1.42749e+06	1.37975e+06	1.41469e+06	1.52445e+06	1.45246e+06	1.29337e+06	1.29862e+06	1.20949e+06	1.37755e+06	1.49878e+06	1.46022e+06	1.41363e+06	1.28618e+06	1.39384e+06	1.45441e+06	1.47739e+06	1.47082e+06	1.479e+06	1.35829e+06	1.5284e+06	1.35295e+06	1.28804e+06	1.46652e+06	1.37021e+06	1.56017e+06	1.39078e+06	1.40075e+06	1.38555e+06	1.23494e+06	1.47381e+06	1.53575e+06	1.40823e+06	1.42889e+06	1.5005e+06	1.468e+06	1.36245e+06	1.37369e+06	1.41036e+06	1.46818e+06	1.25494e+06	1.51281e+06	1.21916e+06	1.57348e+06
6.31_1515.1241n	1.73044e+08	2.54419e+08	3.29623e+08	2.70974e+08	1.8577e+08	4.37751e+08	2.63112e+08	2.40112e+08	2.26957e+08	3.28482e+08	3.26533e+08	1.93179e+08	2.15087e+08	1.98013e+08	2.44879e+08	2.62976e+08	259120810	2.74901e+08	1.98932e+08	2.26735e+08	3.07756e+08	266413700	2.64916e+08	2.74558e+08	2.57818e+08	2.76437e+08	2.58946e+08	2.30884e+08	2.84463e+08	3.05036e+08	2.4331e+08	2.88851e+08	2.01619e+08	3.36128e+08	1.98865e+08	2.67326e+08	2.60626e+08	2.83537e+08	2.43047e+08	3.03833e+08	2.59489e+08	2.87649e+08	2.50096e+08	2.62284e+08	276853411	1.78257e+08	2.77373e+08	1.71998e+08	2.73112e+08
6.31_1894.3766n	502786	1.16543e+06	1.2899e+06	775604	701742	1.41751e+06	799809	781356	836581	1.24172e+06	1.48648e+06	748209	610803	851948	769303	958135	1.30016e+06	1.02544e+06	514557	990325	1.09564e+06	1.2497e+06	1.15663e+06	927208	967989	1.05815e+06	1.07933e+06	836501	1.1753e+06	1.2428e+06	695007	992756	640722	1.38741e+06	468234	953742	962259	1.17075e+06	833890	1.38137e+06	1.18128e+06	1.15083e+06	1.0687e+06	1.0823e+06	1.04336e+06	497141	1.26643e+06	461184	1.14583e+06
6.31_1906.8751m/z	119520	269230	306493	263189	66270.5	403616	229814	255703	223748	266946	325556	171186	176324	165818	237333	252241	277779	291797	145783	184441	264392	238488	229097	230867	225991	240366	202663	225630	284551	318914	229030	173017	107530	327402	108850	231390	186544	331148	250773	271944	220505	281216	228235	236836	251774	116134	255311	71928.2	209651
6.31_1907.3762m/z	27316.9	121012	302633	104704	30068.6	281660	123707	122033	176942	205849	244798	76920.4	101118	63864.8	130745	188460	162324	123010	84233	149621	182111	140903	130873	140750	109843	101578	142156	125351	209150	204162	188499	110054	55897.9	225647	26740.4	169920	122765	235220	208373	187173	180311	133297	133078	174418	112213	70356.7	166585	37832.6	86231.6
6.31_1914.3555m/z	117040	362022	430520	361976	255314	556257	379864	333772	357122	408021	396812	199732	253476	244073	318528	384208	384444	382366	265359	312232	453115	319946	388612	359146	340172	339212	384491	297597	410971	402456	329480	344935	179317	436157	264749	421437	326325	348493	328373	405054	408812	373817	372895	311389	392802	252058	362165	117191	378772
6.31_1918.3662m/z	207473	351254	341791	289780	244808	362254	256666	277034	186286	267145	312881	207373	176170	246825	289918	237849	320012	338743	174660	288398	366320	275519	241303	233650	218345	351133	292953	234019	311922	308810	349214	258453	289583	294465	141989	201292	309323	330732	287608	366846	288990	297775	307546	280460	240905	246651	301769	181595	179341
6.31_758.5726m/z	1466847026	1758124064	1947325769	1685973691	1482186287	2172912563	1684515664	1609785817	1634373544	1856916247	1908082225	1557657869	1597460035	1534360010	1702092281	1806965025	1888396023	1919829290	1703798358	1634064670	1736039134	1664422295	1693748858	1735494252	1694493375	1803783333	1687862180	1606794430	1774873383	1885649066	1731514104	1827626894	1565930108	1924677360	1532706045	1710664238	1734831526	1810344892	1668741981	1907758010	1761382975	1778124076	1750133992	1909326040	1955683253	1613599567	2016112320	1493257591	1852654828
6.31_758.7064m/z	3.87503e+07	4.46594e+07	5.09689e+07	4.07385e+07	3.42115e+07	5.7962e+07	4.04773e+07	3.86661e+07	3.62943e+07	4.51377e+07	4.79021e+07	3.60169e+07	3.7259e+07	3.79946e+07	4.44044e+07	4.37436e+07	4.12834e+07	4.43891e+07	3.83154e+07	3.88758e+07	5.0624e+07	3.92288e+07	4.62187e+07	4.4719e+07	4.45689e+07	4.48111e+07	3.82665e+07	3.64478e+07	4.1136e+07	4.84193e+07	4.6108e+07	4.86289e+07	3.56559e+07	4.41209e+07	3.38255e+07	3.96792e+07	4.31801e+07	4.54405e+07	4.13455e+07	4.74752e+07	4.54892e+07	4.89713e+07	4.23702e+07	4.553e+07	4.63965e+07	3.29803e+07	4.86725e+07	3.43352e+07	4.69795e+07
6.32_1148.3463m/z	1.04773e+06	1.3696e+06	1.13704e+06	1.01446e+06	1.11483e+06	1.1695e+06	1.1811e+06	1.13286e+06	1.15963e+06	1.16252e+06	1.18632e+06	1.20683e+06	1.09045e+06	1.04747e+06	1.13045e+06	1.16937e+06	1.22484e+06	1.16535e+06	1.0941e+06	1.223e+06	1.12651e+06	1.22181e+06	1.15181e+06	1.17255e+06	1.10611e+06	1.23114e+06	1.23162e+06	1.09147e+06	1.13024e+06	1.08175e+06	1.08965e+06	1.23665e+06	1.2252e+06	1.15295e+06	1.06019e+06	1.17502e+06	1.25129e+06	1.13737e+06	1.11972e+06	1.20653e+06	1.22426e+06	1.08932e+06	1.14394e+06	1.20587e+06	1.15664e+06	1.00591e+06	1.21336e+06	983012	1.30524e+06
6.32_1516.2754m/z	3.59806e+06	4.04269e+06	5.01038e+06	3.8775e+06	2.1327e+06	7.266e+06	3.56528e+06	3.16617e+06	2354976	4.12035e+06	5.03893e+06	2.44537e+06	2.78627e+06	3.46529e+06	4.39531e+06	3.51676e+06	2.55047e+06	3.66375e+06	2.4237e+06	3.23249e+06	8.77225e+06	2.62741e+06	5.80345e+06	4.21919e+06	4.43443e+06	3.84826e+06	2.45495e+06	2.48363e+06	3.84308e+06	6.02852e+06	4.71653e+06	5.58044e+06	2.2934e+06	3.84567e+06	2.29799e+06	3.16948e+06	4.01739e+06	4.23888e+06	3.37935e+06	4.57433e+06	4.48013e+06	6.27144e+06	3.73307e+06	3.70883e+06	3.83874e+06	1.53688e+06	4.09816e+06	2.22645e+06	4.79102e+06
6.32_1516.8123m/z	331396	592846	720147	657379	396489	1.00697e+06	572779	508188	442310	701429	825374	456155	475327	400097	579636	580754	620257	583310	419780	513794	616608	448632	533145	651568	536821	549958	516151	491808	543409	671965	466869	672302	452455	805693	371629	539407	532612	666134	563365	696411	552923	707654	551180	515574	570359	370858	597686	421008	636979
6.32_778.0457m/z	704496	1.03416e+06	948083	822703	730324	1.00586e+06	895350	836004	911473	1.03999e+06	979173	620888	1.0059e+06	640683	929528	1.05408e+06	1.12486e+06	722709	681288	821333	892281	859109	844807	928538	724562	1.01486e+06	793662	1.15544e+06	974966	770550	1.14959e+06	857371	845896	867363	880778	938934	859189	997056	863783	1.02078e+06	1.08658e+06	912920	729312	843455	1.03433e+06	802332	643897	649881	721438
6.34_770.0622m/z	471114	605906	471671	464497	612104	601748	513467	551195	625693	488590	544625	604079	637367	612831	583031	654473	675101	543657	516127	676703	506809	583984	564738	456688	444474	574226	581304	438200	441103	530969	529221	548995	553799	563580	539988	616339	596055	522100	657568	592450	630867	520922	655438	628942	590105	570725	543395	550087	521554
6.37_781.0553m/z	157935	163971	90427.7	139451	196529	124095	251276	174687	199478	139680	150481	149291	203857	163314	159101	135831	147308	123060	134984	151509	122904	132644	134784	134144	110132	122857	115137	177610	106356	99984.9	111322	105757	184599	123125	200421	136468	131766	161333	249506	133678	156743	148263	131004	156139	177231	166351	87220.6	140939	114781
6.38_796.5269m/z	603633	646441	648322	702125	573366	683069	878865	814054	689295	723250	840021	580440	735316	639073	746514	615835	626086	583268	498685	558480	649139	634141	699617	611209	515138	551026	644008	662147	605769	623681	575694	664612	644495	678206	752595	794515	608666	594051	764589	864524	640508	754232	706012	785169	658626	668933	644459	475392	682381
6.38_920.5622m/z	64411.3	69005.7	42814.7	46871.4	72826.2	64142.5	63726.7	59016.1	63075.4	59807.6	56253.2	59994.8	61111.8	81535.9	59106	73489.5	60130.8	68083.3	52898.6	53313.4	67669.7	58745.1	44782	65958	68333.9	84376.8	69620.2	63767.7	66235.4	51032.5	45593.6	48185.6	68298.3	80951.3	63542.5	65048	59643	50140	59157.4	66695.5	65468.4	70093.1	45416.1	78513.9	55136.5	68579.8	66411.2	73072.1	62584
6.39_1564.1246m/z	80963.1	124156	625325	246778	65746.1	1.32616e+06	469227	299304	140316	768358	857994	75778.6	837642	107156	300421	260984	173497	589683	41133.5	71912.7	887706	599695	361945	173812	231392	194109	736108	354317	501310	978808	157450	560452	74908.1	794398	174095	432740	410842	224226	101100	629883	326917	612363	588735	252275	384488	225209	337769	68949	403708
6.39_759.6544m/z	4.34074e+06	3.55311e+06	3.32811e+06	3.5076e+06	2.86962e+06	9.01582e+06	3.80836e+06	3.67965e+06	3.00821e+06	5.93833e+06	5.56539e+06	4.02097e+06	4.49071e+06	5.23507e+06	4.29725e+06	3.14787e+06	3.5279e+06	6.00187e+06	3.62099e+06	3.97367e+06	6.04532e+06	3.61859e+06	4.5324e+06	4.14421e+06	3.38699e+06	5.16121e+06	3.25068e+06	2.24595e+06	3.00497e+06	3.00071e+06	4.66889e+06	4.28801e+06	2.7194e+06	4.69475e+06	3.78811e+06	4.64029e+06	4.34483e+06	6.21434e+06	4.08168e+06	5.35376e+06	4.7214e+06	6.21903e+06	4.91028e+06	6.16168e+06	4.91967e+06	3.14854e+06	4.92906e+06	2.61127e+06	6.3604e+06
6.39_910.5238m/z	123497	120830	93261.1	126784	144615	88507.6	99617.4	118178	106245	103901	95093.8	121533	96095.2	112117	125864	114643	135582	126533	138164	133653	111948	130941	129120	130508	115779	180537	130044	150563	141728	117873	117599	112747	106138	124931	123106	93078.4	106852	106966	119029	114738	116516	99606.5	89684.7	137189	118445	119115	120394	117380	107809
6.42_791.0540m/z	72740.3	189828	192206	236621	33976.6	251124	94394	86655.6	40204.6	68605.2	98914	73609.1	131589	137315	63709.6	43498.6	79422.1	108196	63039.7	116515	120184	123502	70998.9	130734	140671	97437.3	205380	404655	112250	228132	165358	137379	119718	149422	53196.9	93899.4	53349.6	65937.3	32338.4	156000	45451.4	176035	121737	76463.8	83375.9	95765.7	84203.4	68887.5	115183
6.43_784.6711m/z	5.53928e+06	5.71045e+06	8.15526e+06	6.60549e+06	5.43396e+06	2.02874e+07	9.7694e+06	7.86411e+06	6.48159e+06	1.0369e+07	1.05116e+07	6.9674e+06	1.83478e+07	7.79944e+06	8.56395e+06	7.92381e+06	4.56389e+06	1.16285e+07	6.52457e+06	7.15928e+06	1.29837e+07	7.78808e+06	8.36313e+06	8.54824e+06	8.10458e+06	7.80587e+06	1.06523e+07	7.89402e+06	9.0871e+06	1.04137e+07	6.26908e+06	8.86283e+06	5.05929e+06	1.00739e+07	7.56528e+06	9.12034e+06	8.04847e+06	8.44513e+06	7.02881e+06	1.03756e+07	1.19949e+07	1.09358e+07	9.41241e+06	8.10015e+06	9.91943e+06	6.96656e+06	8.63676e+06	3.94859e+06	9.45185e+06
6.46_1567.1516n	554117	1.41937e+06	5.5157e+06	2.75781e+06	1.11454e+06	1.06152e+07	3.46508e+06	2.52083e+06	1.95077e+06	5.41531e+06	5.43542e+06	1.74455e+06	1.4244e+07	1.3601e+06	2.26403e+06	2.90256e+06	891327	6.71259e+06	962671	2.83925e+06	8.1295e+06	3.89508e+06	3.57675e+06	2.79724e+06	1.70491e+06	1.64568e+06	5.9158e+06	3.36093e+06	2.96885e+06	6.64369e+06	1.28981e+06	3.74388e+06	652906	5.63356e+06	1.80019e+06	2.87327e+06	1.8867e+06	2.95313e+06	1.57752e+06	5.24595e+06	4.58451e+06	4.13385e+06	4.07923e+06	2.06589e+06	3.12965e+06	2.62803e+06	1.9653e+06	416527	3.12336e+06
6.46_411.7701m/z	123470	137774	176692	138432	134985	237278	177311	161527	167299	207944	182555	157113	289521	126351	154068	177796	128384	228307	133190	180302	215392	189852	156777	173203	142852	143144	208138	163630	150972	181636	135542	165576	127083	202655	145740	183738	163673	144959	139181	189670	213668	181438	185298	166218	188142	182650	160703	122763	195748
6.46_804.0613m/z	9136.62	17304	49174.6	45469.1	15697	92939.9	66875.3	51830.5	54381.8	113339	103755	56953.9	231402	17695.5	54711.6	65901.5	24937.8	119289	26488.7	56364.7	106644	77216	78996.8	84151.6	34767.3	52948.4	167825	108452	62191.7	103413	17464.2	67944.2	20137.2	66102.4	21449.3	73928	48294.9	62295.4	36601	141748	124030	101262	84202.7	39865.2	75577.2	60940	21848	15410.2	36127.7
6.47_412.2719m/z	73719.8	89144.5	89305.8	77123.5	77468.3	118943	103876	89410.2	79027.4	102979	86986.4	99208.7	142880	79853	87122.2	91282.1	77729.1	122174	80845.1	95818.6	112159	102682	92391.3	93839.1	82331.7	79634.9	109528	93220.6	92566.8	102124	79002.9	90144.1	77291.9	111566	83217.4	92394.2	89547.3	80347.2	79943.1	94529.9	110418	90572.1	99398.4	88728.7	108239	106762	89748.2	62805.6	99334.5
6.47_599.5038m/z	254090	241936	329992	591903	446682	118102	260818	269376	137926	361302	297808	246071	147697	209376	182423	306441	272577	287460	292210	221904	259893	215174	198569	128920	358285	247262	197922	238133	375949	309054	233375	522153	170400	307193	302915	148047	128199	555903	250142	253581	211490	474409	304478	184148	243551	177676	288160	160095	226564
6.47_769.9681m/z	33768.2	26464.7	49153.2	30601.5	33607.1	76142.9	40407.9	30335.1	40440.1	56347.9	111598	51875.9	121334	47715.6	49778.1	44047.6	28237	73140.9	42939.7	38163.9	123219	86733.9	66695.5	60914	34903.1	59797.4	93715.4	106247	81997.3	111358	36136.3	39444	27753.2	48938.8	20102.9	44681.2	43639.6	43059.6	43878.6	78075.9	92244.6	60595.6	40361.6	30297.5	43608.1	39713.3	41005.8	19278	66249.6
6.47_783.5798n	5.3376e+06	7.06009e+06	1.09365e+07	8.4616e+06	6.36675e+06	1.43713e+07	9.86838e+06	8.64216e+06	7.86216e+06	1.08977e+07	1.07098e+07	7.29738e+06	1.5849e+07	6.72644e+06	7.89976e+06	8.90481e+06	5.82663e+06	1.15609e+07	5.53469e+06	8.64563e+06	1.24048e+07	1.01935e+07	9.53031e+06	8.89095e+06	7.12773e+06	7.1532e+06	1.15673e+07	9.29511e+06	9.24549e+06	1.11826e+07	7.01786e+06	1.00149e+07	5.8424e+06	1.13594e+07	7.56225e+06	9.48995e+06	7.71493e+06	8.33786e+06	6.9144e+06	1.10243e+07	1.09571e+07	9.72488e+06	9.84406e+06	8.03163e+06	9.37204e+06	8.99773e+06	7.34845e+06	4.5825e+06	9.46821e+06
6.47_784.7279m/z	251941	281921	367925	284740	265453	526280	371626	259556	327694	375208	394950	293015	589311	349041	236465	389000	225747	528066	336331	381669	399935	374233	335440	295645	314415	268878	454492	380657	435409	364609	284929	434048	201794	409309	258251	364737	268385	338471	305278	333177	375416	397900	402036	317631	306207	292580	278785	169626	346735
6.47_784.8411m/z	231324	337661	471216	354482	333456	891857	491575	364749	385279	592290	566296	423876	1.58556e+06	288278	370405	405068	274272	590695	303551	443289	663367	585493	494160	455924	322433	298835	448460	361226	373158	480675	316858	416278	267311	532447	310243	469234	344984	416896	351197	563261	578122	429746	451010	350959	444588	370285	289526	246234	421031
6.47_785.3946m/z	31170	67928.1	53441.8	62923.7	69312.2	126895	87741.7	75582.5	56413.4	118769	66468.4	57742.1	154638	46215.9	86100.4	57679.5	68633	94808.7	42167.9	63544.7	89744.6	66962.3	86316.4	115294	50603.7	58670.1	60400.9	71420.9	89554.8	93557.5	45276.1	71755.8	34699.5	77918.1	81411.3	65336.4	71741.3	63612.1	48437.8	80226.4	78147.8	66485.2	86217.2	74086.3	88887.7	62746.6	79042.2	28909.5	62829.4
6.47_796.0784m/z	22058.9	19758.9	60499.1	28031.6	22070.8	91428.8	85707.1	28157.1	18041.3	60455.9	67394.9	13075.3	146411	33894.7	46913.6	22723.2	32660.8	140565	35490.3	65662.8	79392.6	86464.2	43484.9	56808.2	34310.2	22603.1	94909.4	48125.1	58856.4	87065.4	23814.9	35859.4	33424.5	55875.1	48229.9	61760.6	64746	55123.6	41088.6	75783.1	58493.9	51610.1	77300.7	34260	45351.4	45115.3	23053	9171.65	68764.4
6.47_837.5588m/z	75510.8	78747	90651.5	75276.6	59550.9	96641.8	79671.1	71834.7	78487	83311.5	108173	86497.2	115874	99938.4	86813.4	63118.9	72851.8	76070.2	54530.5	62608.1	76831.1	83035.3	61603.3	81508.5	56176	47477.4	63063.3	55583.4	56355.5	85852	73805.9	94289.9	60623.3	80670.6	75855.9	82437	72191.7	88915.1	72747.9	97989.9	83956.8	84422.2	93517.7	81038.5	74930.3	70258.7	60972.7	48367	64540.7
6.47_868.5390m/z	270386	315658	349370	274172	314816	459183	378259	338470	363854	377079	359667	346687	547578	300794	332323	353144	287578	430725	275153	346313	381873	385840	338900	346395	297818	307383	413409	366236	327014	388734	303121	349623	310645	393649	307892	368388	348420	321039	308870	369216	403694	347996	376999	340059	374405	351714	285023	251437	346580
6.47_873.5490n	410616	495087	529482	499020	434014	686042	580032	576771	542312	601246	581658	525311	785329	509168	543156	535855	450156	667722	434893	519352	634158	555000	551298	575304	489293	520893	670206	580388	545400	531618	479591	570765	447119	622118	517923	593260	511201	519849	493489	625832	610126	562146	575985	536160	594379	569909	451750	365877	539983
6.47_968.5642m/z	61854.1	73749.3	63711.7	70357.6	66211.6	100153	94473.2	71694	82054.7	95790.9	88469.6	86183.6	107848	96949.8	71591.5	89155	68686.3	83882.9	67755.4	69076.9	61699.8	75570.5	57858.9	81648.7	63007.3	66141.8	108149	69366.6	70195.9	70585.4	91294.4	78836.2	76343.5	80463.4	88679.8	92499.5	86009.4	79319.1	65416.4	88956	84807	81739.4	89838.1	96589.5	75952.6	68029.6	65251.3	55918.6	68349
6.47_977.6098n	1.70717e+06	2.31083e+06	3.671e+06	2.63983e+06	2.14525e+06	4.93255e+06	3.31515e+06	2.89596e+06	2.62153e+06	3.61625e+06	3.55122e+06	2.62072e+06	5.82296e+06	2.26127e+06	2.71308e+06	3.13008e+06	2.05501e+06	4.1553e+06	2.09393e+06	3.09391e+06	4.38475e+06	3.62377e+06	3.14118e+06	3.10393e+06	2.43083e+06	2.46856e+06	3.91095e+06	3.1118e+06	3.03634e+06	3.80618e+06	2.35582e+06	3.46506e+06	1.91089e+06	3.76188e+06	2.53245e+06	3.1274e+06	2.67575e+06	2.76283e+06	2.36325e+06	3.57686e+06	3.63481e+06	3.25992e+06	3.57555e+06	2.81915e+06	3.28207e+06	2.99788e+06	2.62417e+06	1.59159e+06	3.26938e+06
6.48_740.5245m/z	1.48055e+06	1.53064e+06	2.12453e+06	3.91123e+06	2.61174e+06	669617	1.52862e+06	1.50264e+06	706361	2.01062e+06	1.77349e+06	1.36552e+06	839475	1.27676e+06	968406	1.82439e+06	1.71251e+06	1.62049e+06	1.86106e+06	1.4364e+06	1.73922e+06	1.28664e+06	1.25814e+06	782643	2.36624e+06	1.48127e+06	1.24356e+06	1.45342e+06	2.34382e+06	1.90862e+06	1.46012e+06	3.43158e+06	890849	1.81594e+06	1.7837e+06	953771	654432	3.52702e+06	1.50328e+06	1.44429e+06	1.11242e+06	2.95382e+06	1.8595e+06	1.03893e+06	1.40283e+06	880453	1.83488e+06	960444	1.35966e+06
6.48_841.6298n	486899	522941	600323	554941	531804	697501	629346	645174	579485	593145	604341	584702	775152	565511	598213	613193	551354	676872	503451	588851	618440	677425	639516	592275	540215	572531	639510	626033	553980	648127	516670	568626	488857	601403	584910	592727	580517	562456	538811	663037	655272	612703	650540	610221	617109	604002	543166	467950	614879
6.48_936.5276m/z	149166	169380	151320	145587	186573	198306	212797	226283	186692	183505	175215	211332	237802	207900	205498	202821	195070	223151	173717	226820	151255	191005	177221	209362	177337	182830	192298	201995	204400	215066	173548	155023	175063	218945	204265	216424	179328	159114	190110	146945	186350	163029	173093	207646	186306	211794	188021	166520	183678
6.49_786.4543m/z	44352.6	71761.4	77339.9	63460.4	67379.5	79447.1	77065	67112.1	93194.9	82977.1	56988.1	75845.6	112068	54512.4	38419.1	97105.8	86300.5	98598.9	64387.9	94368.9	97864.7	117414	73358.5	104686	32786.3	56033.1	95137.8	88175.5	54026.5	77794.9	64209.1	67767.4	72787.8	83200.9	63505.9	73667.2	78110.3	76768.6	63723.6	96481.8	84693.3	63353.6	104423	70957	96069.2	139039	52819.6	86054.4	94861.8
6.50_860.6117m/z	387881	370355	372739	392188	339038	331096	436371	340090	339907	360199	372383	348250	549433	374568	422624	369742	334272	353325	326301	368610	349468	472535	290298	324521	322476	288212	340878	312447	337644	303995	326495	392746	291494	461539	465839	345109	268462	340020	358130	326521	309999	351748	369264	374238	307591	346962	341152	320466	271646
6.56_784.8605m/z	60547.9	63878.9	104396	33055.3	46920.1	109566	83854.2	76248.8	64063.6	129969	115347	104675	99130.5	116636	93288.8	80836.9	82841.1	74818.9	65265.2	88658.5	62808.9	74177.2	135657	86398	68540.3	103413	91568.9	95584.4	62175.9	66024	66981.3	72451.8	30951.6	53025.4	59043.5	123734	70694.1	80786.8	82301.7	151234	104065	76088.6	79056.2	76817.8	60477	75064.9	88804.3	70977	86748.4
6.60_424.4518m/z	607315	545811	436554	445039	611175	586466	537792	623696	769354	621923	905003	1.80047e+06	540347	1.92123e+06	2.26824e+06	1.38267e+06	1.33173e+06	802079	1.6897e+06	1.78159e+06	779098	1.37665e+06	1.53313e+06	1.1184e+06	1.52217e+06	792301	1.917e+06	1.75939e+06	1.34949e+06	793827	520850	628260	618075	591966	561738	509230	613986	1.23618e+06	690475	1.16529e+06	1.33805e+06	1.30171e+06	701644	1.48944e+06	1.41232e+06	1.72572e+06	681226	500166	664663
6.65_625.5197m/z	201988	183329	234768	240906	242162	126369	230724	195520	155078	229313	208354	178395	198880	190539	170970	209531	197114	215819	219701	201530	214472	200166	159582	146237	216713	170856	204823	243863	234857	212612	198424	345913	165367	205615	242537	159656	141673	271433	200225	161841	172224	253292	256506	158394	181607	180866	213588	168419	184747
6.70_653.5495m/z	33628	37349.2	48258.6	68886.9	58517.6	33606.2	54199	37962.2	29565.7	51102.7	37101.9	41610.1	40843	52404.6	45936.9	44744.4	51562.6	39890.4	50989.5	42163.7	39682.9	37755.3	47424.1	38333.9	31873.8	45096.8	44575.2	28698.6	38290.4	57812.4	38183.6	52602.4	35352.3	24509.2	33223	37526.8	30078	35654.6	46207.6	50318	39578.4	46538.9	39310.6	37627.6	32139	41216.2	44993.1	34434.5	28163.2
6.74_575.5039m/z	120706	176227	234163	447033	436896	118122	213660	188865	101295	295395	279966	259994	79754.4	128617	102392	240137	244647	206662	205250	259631	185945	170456	122154	128482	305047	242978	215498	165444	258773	181165	137679	323092	134778	360491	329617	99699.4	107839	430699	198829	233873	173196	388751	174242	163294	167293	117696	206039	98726.4	186366
6.76_743.6037m/z	523322	493478	703967	677767	409151	691147	554019	688428	420749	695053	606173	534037	468200	560565	582361	579010	601725	562159	563281	561663	649912	598251	632182	521206	465005	492940	489140	591890	771626	925751	546320	661007	466196	633025	572690	726545	508451	397863	503838	623720	514864	612714	783529	580909	458119	520947	763631	568831	610360
6.77_746.5711m/z	3.42052e+06	5.16764e+06	5.93336e+06	1.01988e+07	4.99381e+06	5.35567e+06	3.65916e+06	4.72214e+06	3.27256e+06	8.97126e+06	1.19415e+07	5.27968e+06	4.85053e+06	8.45624e+06	4.38922e+06	5.04249e+06	3.56721e+06	3.36122e+06	5.27223e+06	5.84966e+06	4.73229e+06	4.4304e+06	8.84954e+06	3.28122e+06	6.59887e+06	5.80727e+06	2.83422e+06	5.30442e+06	6.15224e+06	4.66527e+06	4.35219e+06	4.42363e+06	3.27423e+06	4.9274e+06	1.20497e+07	9.22173e+06	3.17477e+06	8.79295e+06	3.95827e+06	1.12022e+07	4.38384e+06	6.93695e+06	4.77662e+06	8.72441e+06	3.4549e+06	6.30506e+06	6.95193e+06	4.07478e+06	4.52469e+06
6.91_601.5191m/z	40729.5	59521.7	101006	101280	122954	78612.2	114004	80390.5	59099.7	136505	144115	100706	94473	56678.7	45657.1	85635.7	79956.6	118229	73038	126615	115383	92916.3	44702.9	53037.5	80407.8	88067.5	162446	110459	102229	91687.9	41752.3	143139	59440.5	127979	177922	36170.8	50243.1	119793	50349.7	91720.7	93686.6	171607	89450.8	64256.9	88511.8	71450.4	75337.6	32195	82944.4
7.16_879.5688m/z	210716	190787	213054	172121	192035	172632	200941	219336	214743	181159	178376	196334	180824	165477	202480	174325	201736	205655	210081	179093	195589	182577	194616	199003	197541	182100	164385	188128	192574	214269	204731	193143	188208	172278	208260	197334	179323	174031	171538	198538	193987	171233	206229	214737	187170	205262	202730	198757	174211
7.16_966.6158m/z	158238	167225	313093	218522	157094	325622	196278	232402	154048	328929	346278	187233	248880	217050	197466	205397	221502	211454	158649	173757	251897	208476	277273	204264	205275	163184	181885	225081	218482	343651	216531	230305	159960	212738	235115	272813	190660	209404	178838	369761	224585	243322	274665	279246	164343	230227	241314	194682	243623
7.17_772.8586m/z	61055.5	73272	177821	107748	36778.3	134973	155604	168751	47772.2	81392.7	96172.4	60222.6	165877	114847	102354	106629	127426	109366	36946.3	104673	236511	153389	420514	126690	232852	89292.1	150781	91737.9	173675	448334	147785	216355	83112.1	156984	183115	116611	100862	76057	102051	97336.9	164384	149076	171603	168311	61006.2	225820	183107	41473.7	293599
7.19_368.3887m/z	79612.2	107966	52910.8	61605	79857.3	115916	106065	101090	109508	96069.2	147166	189826	126006	248564	286004	250910	240167	148180	243765	322447	136571	209035	218184	255668	286840	168241	306442	273220	250783	158630	96361.7	90268.1	124694	106214	110525	97981.2	110711	148369	136353	152538	192699	194097	134037	227110	202090	241305	155115	135512	138170
7.25_629.5499m/z	54376.3	70772.1	80896.6	110082	78229.4	108746	54601.1	58713.1	29299.3	97916.6	89557.4	38210.1	93535.3	69390.5	46909.2	64156	52908.5	51668.3	43156.1	76260.5	105982	46586.9	85812	39384.5	55697.3	36720.9	57682.1	64471.9	85113.6	122317	34298.7	44496.4	34791.7	64769.9	93270	71422.5	19544.2	82091.6	73215.1	69291.6	46623.8	78282.5	69391.5	42579.9	54126.6	42287.9	69002.3	43349	36263.9
7.29_925.5725n	138298	123165	151295	134170	114079	127343	126009	125861	100587	127120	158332	127079	140378	129066	131822	128607	143293	133802	129749	149238	147622	137935	135264	138463	143320	129533	109921	122772	140499	155681	139647	122120	121449	122695	142003	123747	122052	143914	134461	151573	128305	145392	141767	144183	97800.6	131093	138892	128316	117379
7.32_553.4357m/z	38952.6	33919.6	49132.3	23710.7	34758.8	54263.7	73691.9	46138.6	60590.9	38498.7	25611.4	32044.5	47647.4	29483.4	68405.4	59321.4	34479.7	34645.2	45575.3	61817.9	35834.1	40547.1	56195.1	53215.1	37672.5	83550.1	39512.9	77118	58658.4	61640.2	30114.4	25983.8	46929.6	43955.2	22367.7	42912.3	29593.2	42654.2	25156.1	47784.1	57332.4	61069.7	53800.7	38873.1	27876.5	52990.1	29584.7	38625.2	47029.1
7.34_744.5916m/z	1.39062e+07	2.0185e+07	2.65097e+07	2.43583e+07	1.7593e+07	3.44168e+07	2.25929e+07	3.64461e+07	2.16944e+07	3.2572e+07	4.94892e+07	2.75754e+07	2.66144e+07	1.91268e+07	2.15586e+07	2.2835e+07	2.12224e+07	4.56335e+07	1.12443e+07	1.92903e+07	3.6984e+07	2.6842e+07	3.35443e+07	3.63183e+07	1.96751e+07	2.7456e+07	3.47069e+07	3.76341e+07	2.23118e+07	3.20012e+07	3.21835e+07	2.52211e+07	2.2716e+07	2.24459e+07	2.07726e+07	2.82696e+07	4.03728e+07	2.56204e+07	1.78633e+07	2.87398e+07	3.84455e+07	2.39436e+07	2.40888e+07	3.47374e+07	2.50922e+07	2.37877e+07	2.25636e+07	2.63828e+07	2.47499e+07
7.35_860.6140m/z	650790	536689	965403	681465	484749	722013	692428	566184	584182	644009	700304	465980	1.04829e+06	740789	591595	574405	576961	680766	568019	632007	681442	833374	561856	518383	406207	378799	594036	379765	633775	728064	719286	1.04867e+06	516451	631488	579563	848941	444248	449043	542770	641515	674176	638689	785257	538995	554694	637719	538568	485284	523160
7.36_391.7744m/z	3373.21	3848.11	2898.06	4894.18	2729.31	14807.8	8104.9	13137	6256.95	5825.44	23861.7	10060.1	6102.89	4226.35	5432.16	6179.3	1988.57	19939.1	2232.04	3097.73	16253.7	5840.08	9582.62	11936.5	3775.12	8845.35	6849.94	10342.5	3509.29	8313.49	11830.6	2251.38	7607.91	761.316	6906.98	8256.08	31070.9	12777.5	3555.49	8739.91	11354.8	4513.93	2346.47	8311.32	1811.96	2640.04	7085.01	2237.35	8640.9
7.42_756.4876n	298501	250045	294078	298374	325857	326375	317424	339525	361055	298405	359850	357265	292856	338748	351289	408466	314278	348865	367344	303177	349866	340301	293704	335615	310517	338946	290093	302445	314898	312411	281844	291323	314724	279389	289868	318087	290303	318607	329450	301517	306627	325082	358842	333884	346620	348569	327627	396216	351608
7.46_770.6064m/z	6.19024e+06	6.03583e+06	9.92611e+06	9.39174e+06	8.64805e+06	1.29079e+07	9.35608e+06	1.23723e+07	8.57101e+06	1.17611e+07	1.64232e+07	1.08552e+07	1.09226e+07	8.11267e+06	8.30859e+06	9.21932e+06	7.10957e+06	1.4917e+07	4.61633e+06	7.69034e+06	1.40426e+07	1.16021e+07	1.24472e+07	1.26891e+07	7.84501e+06	8.35126e+06	1.1252e+07	1.21748e+07	8.48438e+06	1.11287e+07	8.62298e+06	9.62977e+06	9.10826e+06	1.0216e+07	7.95043e+06	9.82079e+06	1.57267e+07	7.14084e+06	7.1428e+06	1.10262e+07	1.67508e+07	8.4646e+06	9.10617e+06	1.30101e+07	8.90686e+06	9.476e+06	8.2805e+06	8.39698e+06	8.83833e+06
7.47_568.5068n	120231	117168	121754	103490	136069	121454	122992	113710	137053	107625	104032	132337	126254	118300	149649	123317	130858	128019	135709	128595	117155	129679	120210	138563	117819	152425	115597	126394	135941	131736	123454	114573	144274	118388	115675	122103	116785	103987	121720	123188	123884	120464	137967	121707	131131	131440	110355	126134	125958
7.51_460.3682m/z	47289.4	54367.6	73770.5	44700.3	64863.5	62337.6	104703	69586.3	96609.8	41776	35959.7	78988	109254	46404.5	186268	89698.1	91037.4	39216.5	65900.5	105079	44144	37211.2	109308	107247	45841.5	145492	50672.7	139371	52736.7	113869	42344.9	49025.8	92964.1	75006.1	21914.5	121248	44013.2	45227.6	45725.4	99786	58859.2	85755.6	151121	60464.2	31685	53057.9	44279.6	51397.7	52067.2
7.51_552.4336m/z	588565	619833	1.06217e+06	567116	898486	797879	1.8115e+06	998917	1.68654e+06	511440	473951	1.25676e+06	1.82131e+06	570520	3.45762e+06	1.30053e+06	1.31318e+06	365129	838495	1.78781e+06	550869	398928	1.74514e+06	1.73621e+06	537634	2.66118e+06	623432	2.47277e+06	634362	1.57272e+06	490455	533948	1.36349e+06	1.06232e+06	172988	2.18304e+06	480659	633782	558020	1.67282e+06	785624	1.3115e+06	2.60689e+06	763679	332277	551473	516213	601929	587347
7.57_585.5243m/z	24569.5	41490.7	47634.7	29989	25460.8	76160.3	37667.6	50070.4	43697.3	36198	76616.7	47825.9	31858.5	48459.3	84494.6	35253.7	30008.8	64845.6	37129.9	59571	111627	57579.4	92944.9	68411.9	47036.1	46224.9	57736.3	145924	44910.1	72696.1	71941.6	28913.1	46365.9	16804.2	42598.7	34519.9	59379.8	62131.3	37241.5	37037.5	42419.2	57525.6	82621.8	34315.4	25264.3	52795.9	67966.5	52992.6	48387.2
7.58_726.5437m/z	348865	604516	663649	507119	346013	992283	475266	612662	574153	433429	873044	609612	412503	649100	976996	374741	358321	781311	447114	662783	1.35099e+06	610858	1.06514e+06	787569	495437	502364	606554	1.5954e+06	588122	720349	900417	417553	548503	268269	548448	453022	714954	851175	436727	491016	506971	728880	1.01106e+06	353229	425152	621591	830728	673862	658859
7.59_605.5508m/z	330259	382084	521486	696020	796603	860049	490308	384731	377090	604923	832080	691311	789615	352172	252660	614026	349360	717106	368220	617665	658526	396850	664949	517662	449918	874019	411445	408267	326409	823641	384669	355427	379268	366526	615344	450732	230851	577042	409747	500066	397677	672246	452530	613199	450693	479634	365714	356932	467833
7.59_864.5722n	468025	536129	643406	698339	945938	990868	632100	517082	497319	710712	926134	859438	975330	477293	350215	777256	498045	900746	483960	741825	796043	500301	816400	681753	574424	1.05472e+06	570322	546685	425794	949739	532926	502232	498019	496689	740403	580992	318090	654871	520015	616738	540091	759282	564518	739463	590216	617783	471446	482035	555398
7.60_739.4715m/z	59725.1	63416.2	68940.9	42577.5	56952.2	52631.8	62984.2	77171.3	77104.4	61811.1	75469.1	84253.5	77421.3	79924.3	75195.8	69753.4	77815.2	80386.2	73300.5	65495.3	62203.8	67704.2	65894.3	68932.2	55679.8	43786.1	59863.4	51764.5	61247.2	58775.7	68245.5	70346.4	64368.8	65539.2	59495.8	69984.3	83818.8	53273.7	67767.6	61173	79134.3	73395	80839.7	77808.4	73811	82687.9	65256.8	72509.9	64685.8
7.64_827.6040n	1.55233e+06	1.51495e+06	1.53268e+06	1.13406e+06	1.20175e+06	1.31235e+06	1.3468e+06	1.30686e+06	1.57839e+06	1.50647e+06	1.37461e+06	1.26716e+06	1.52384e+06	1.34103e+06	1.42201e+06	1.4012e+06	1.71838e+06	1.42138e+06	1.11812e+06	1.18253e+06	1.54109e+06	1.36762e+06	1.85462e+06	1.36191e+06	1.26883e+06	1.21035e+06	1.32273e+06	1.25629e+06	1.64755e+06	1.52585e+06	1.6805e+06	1.51823e+06	1.20944e+06	1.21359e+06	1.30599e+06	1.37917e+06	1.44983e+06	1.31239e+06	1.42997e+06	1.28599e+06	1.4912e+06	1.25029e+06	1.38387e+06	1.35692e+06	1.21393e+06	1.5075e+06	1.18769e+06	1.1747e+06	1.29593e+06
7.64_976.5983m/z	759833	730530	706917	445086	735152	686283	644177	593838	689830	703837	624767	742813	775844	775427	698413	680526	738859	727610	753095	640368	694152	697658	685614	640241	596103	644159	565634	614885	693351	583447	713557	725507	576395	693433	649589	731960	628073	525280	659374	650634	851833	727649	734869	746917	779416	656716	707023	669572	628496
7.65_400.2717m/z	194838	193208	190424	212993	220249	213064	161379	149976	186813	198377	213975	197926	203674	199860	180352	194750	182543	189541	232929	195267	205219	183627	208679	181169	183307	215306	155289	170143	198442	166114	169786	202453	150397	206980	199028	210064	166122	218530	187730	210816	199937	214552	183402	198453	192234	163859	220868	170734	178369
7.65_783.0707m/z	306281	284914	293543	214620	309054	329649	222625	213492	255732	256627	257854	249077	251325	274521	212755	202856	189330	244292	249913	183939	273316	220212	320028	231678	211038	330096	185355	260477	305423	225149	284507	348899	132305	297531	293454	277700	197863	242873	170222	284411	245204	192708	196301	283358	272462	202990	230407	195953	176108
7.65_844.5388m/z	992219	979737	1.02967e+06	813341	1.00381e+06	914307	848005	943577	909757	1.05366e+06	1.07288e+06	925989	1.08406e+06	990199	1.03266e+06	967576	901920	967673	1.12356e+06	902222	1.04408e+06	1.08479e+06	1.0313e+06	1.0418e+06	915768	1.03819e+06	909990	889108	963965	828627	951499	981701	837336	995040	1.08608e+06	1.07634e+06	896558	979685	893834	1.13093e+06	971274	913810	899030	1.02105e+06	1.02561e+06	947361	987834	873781	853082
7.68_780.0612m/z	288593	348149	415298	744217	562988	498833	282434	265226	323516	538419	523199	410042	324728	377790	320075	391415	279078	351476	410461	328552	461936	298461	438704	256908	294448	535481	201395	369549	483033	320876	353576	408890	166914	430912	553541	446021	162714	636031	314726	589893	356146	374542	378815	468387	359972	216731	439016	240114	326171
7.73_1201.8856m/z	9996.84	29903.2	30435.4	52398.2	17104.7	2363.23	37044.9	59604.6	27218.7	97260.5	102119	27447.2	110279	150982	150076	64107.3	49736.5	27558.5	12878	15846.9	9278.53	4481.64	3032.24	13177.1	46443.6	39677.8	26998.1	57954.9	125735	59048.1	8962.69	33084	14636.2	35947.4	122091	120130	78939.8	82777.6	80302.1	76771.1	56320.7	98355.4	37508.1	67443.1	13325.2	32931.3	3355.52	19986	15356.7
7.74_726.5446m/z	550465	856559	1.09896e+06	532958	720910	1.79749e+06	918211	1.27044e+06	975314	1.2447e+06	1.93533e+06	1.39758e+06	1.35106e+06	760409	900242	1.21878e+06	906955	1.25384e+06	401682	1.14411e+06	1.68829e+06	811017	1.52078e+06	1.62841e+06	1.09449e+06	984487	1.43314e+06	1.73549e+06	834347	1.34911e+06	1.37224e+06	760667	1.23622e+06	974769	891604	1.02941e+06	1.94959e+06	1.01362e+06	708381	1.29406e+06	1.18821e+06	872685	1.11957e+06	1.32558e+06	1.04189e+06	1.70992e+06	988087	1.96084e+06	913817
7.75_631.5667m/z	21650.7	43390.3	30912	28898.1	52531.7	67346	55471.6	38231.1	16718.7	84262.1	54565.7	56182.9	36957	23429.3	31261.8	51063.6	67766	56434.3	26847	48234.6	52054.2	54804.4	53496	49987.4	35029.8	56669.2	62802.8	28890.5	42330.1	34430	30150.2	48333	37501.6	73049.2	31444	33598.8	32123.8	40459.7	57335.2	66960	60806.5	48020	32284	32467.5	29080.9	39550.1	57265.6	30718.9	37112.6
7.77_818.0776m/z	91262.8	41317.5	101370	48349.9	28228.4	64265.1	62947.5	30029.9	36410.9	59022	60753.3	43409.5	88101.1	52804.4	46265.5	103633	79123.9	89604.7	68817.3	46428.8	66060.7	62550.2	77430.5	17229.3	48983.3	41728.1	48338.3	72179.1	63378.2	133170	48364.5	96311	16936	79925.2	33841.7	65012.7	35295.6	63240.6	42627.5	89985.7	67938.8	102027	57466	86117.6	82559.4	68816.9	99498.3	25664.6	56116.8
7.77_854.6286m/z	125739	116908	113333	64886	98501	134231	183733	152828	329845	240607	176215	141101	237039	119474	288765	311761	321293	217665	142957	242721	246241	147919	388515	216266	139698	204152	298506	128303	220391	128820	92780.4	88076.2	162155	126390	123256	113966	192213	190107	122599	161455	225209	139644	160962	268268	128712	325855	102427	103472	226193
7.82_412.7784m/z	203341	226580	207566	185365	239354	256458	226620	237185	240363	241769	222770	248784	265935	213114	212936	222283	221810	227250	218854	233098	228442	212870	214838	234594	210376	232529	211792	206446	200152	207142	210312	212238	212623	220933	234665	253018	246688	191693	239222	201433	241581	198387	226633	224852	228875	230758	219080	195223	236936
7.82_870.5550m/z	553891	538186	520483	495078	585128	550234	572378	709409	539951	524979	501191	508485	463118	514800	453207	464685	459185	470082	445006	467687	529366	542040	505446	596373	507062	594210	468630	429950	442861	386070	545388	428717	555536	514501	577211	597791	542725	492143	465149	472420	538870	466415	421485	517981	425755	527395	408154	536379	439986
7.83_1198.3766m/z	321478	506612	379499	314012	411935	530971	420567	493066	464097	573799	511973	427883	399620	324298	337348	349276	405069	410081	339493	346974	403394	354587	385149	438226	458131	510206	462482	386150	348175	335620	383953	409639	405301	367312	515182	470310	615686	431147	481289	472830	324440	329512	380089	421559	356278	413982	417994	279092	411266
7.83_1983.4581n	62718.4	257269	633079	282963	296292	459892	241116	110870	186382	414480	284011	281679	355571	89182.9	162079	322611	174830	294066	91951.2	276362	298973	243035	238512	265546	308213	342772	159689	182737	134872	385411	122144	356438	179806	516226	483737	204935	189346	286626	294666	502169	224560	278258	357903	399433	154827	78405.8	320828	27748.6	220380
7.83_502.3280m/z	56320	59455.4	48569.8	40790.5	60468.2	56286.6	59182.3	54584.6	61463.5	52113.1	48480.3	66291.6	53995.7	53062.8	51182.9	55286	58743.2	60573	60883.8	52179.3	58769.1	56574.6	53894.9	57376.1	54029.2	55164.4	54921.8	56298.9	50259.9	55705	52509.8	51711.2	51863.2	41802.3	51358.1	65036.5	61198.6	47901.5	57941.6	49480.8	55560.2	44160.1	51707.1	57178.1	53274.9	61304.9	58585.5	62029.2	58254.9
7.84_788.7572m/z	259575	447475	403579	433005	419786	508690	456013	296364	352595	411356	457670	412360	336221	400022	428233	373867	411569	427836	308814	419597	436313	377734	365052	398525	443892	393236	473714	391160	325466	400682	352478	362805	338399	408162	395264	393666	409860	386395	382187	472578	393450	377430	474258	407710	327401	356869	464312	329144	361141
7.86_1572.5678m/z	301960	366571	393940	348035	324829	430608	309825	353515	308489	536778	531008	373811	351605	366457	310125	395255	336779	374328	344027	314436	394651	287259	399977	287163	403259	438170	378917	405335	359869	327646	304907	301032	253089	442477	348448	325882	403991	389391	327977	550364	329025	404278	433868	339055	373966	284012	473434	334618	356036
7.86_980.6332m/z	7.21133e+06	7.03749e+06	6.09187e+06	5.8163e+06	8.04185e+06	7.49035e+06	7.57972e+06	7.40833e+06	7.88768e+06	7.37657e+06	7.1607e+06	8.01582e+06	7.91015e+06	7.17064e+06	6.82101e+06	7.60474e+06	7.2496e+06	7.39348e+06	7.36068e+06	7.14566e+06	6.88531e+06	7.05692e+06	6.7517e+06	7.04748e+06	6.74149e+06	7.40707e+06	6.84766e+06	6.75314e+06	6.413e+06	5.87944e+06	7.09683e+06	6.67664e+06	7.70749e+06	6.6831e+06	7.1745e+06	7.60622e+06	7.99303e+06	6.74735e+06	7.5713e+06	6.7311e+06	8.1533e+06	6.22028e+06	7.14419e+06	7.33766e+06	7.41635e+06	7.77719e+06	6.99792e+06	7.42886e+06	7.30852e+06
7.87_1324.8978n	1.27223e+07	9.23467e+06	6.6421e+06	7.22283e+06	8.78132e+06	7.55841e+06	9.14916e+06	7.80671e+06	1.42201e+07	7.48842e+06	1.08897e+07	1.94303e+07	1.04755e+07	2.61509e+07	30650247	1.5613e+07	1.9331e+07	1.05132e+07	2.40977e+07	1.82644e+07	1.12028e+07	1.96703e+07	1.88832e+07	1.24225e+07	1.6051e+07	8.95517e+06	1.94053e+07	1.85913e+07	1.00531e+07	1.0385e+07	1.13134e+07	7.23822e+06	1.28623e+07	6.11806e+06	7.78737e+06	7.85272e+06	9.76289e+06	1.07558e+07	1.04403e+07	1.12921e+07	1.76073e+07	1.50346e+07	1.00887e+07	2.27634e+07	2.36513e+07	2.15683e+07	8.18245e+06	1.09162e+07	9.23709e+06
7.87_550.3228n	2.2932e+06	1.95383e+06	1.50624e+06	1.48437e+06	1.93817e+06	1.7478e+06	2.05384e+06	1.82839e+06	2.61946e+06	1.73858e+06	1.99596e+06	2.90088e+06	2.02449e+06	3.20458e+06	3.48051e+06	2.48645e+06	2.77173e+06	2.08463e+06	3.06934e+06	2.545e+06	1.95841e+06	2.70439e+06	2.57466e+06	2.41751e+06	2.63244e+06	2.0817e+06	3.03377e+06	2.89248e+06	2.12661e+06	1.92433e+06	2.23868e+06	1.6172e+06	2.46249e+06	1.54347e+06	1.81775e+06	1.92722e+06	2.19376e+06	2.00616e+06	2.21211e+06	2.00147e+06	2.7138e+06	2.33226e+06	1.9491e+06	2.82051e+06	3.18553e+06	3.13391e+06	1.81137e+06	2.17897e+06	2.02562e+06
7.87_607.3928m/z	3.36464e+06	2.88416e+06	2.40929e+06	2.40961e+06	2.97328e+06	2.69064e+06	3.13554e+06	2.79543e+06	3.92009e+06	2.76341e+06	3.25686e+06	4.48832e+06	3.08268e+06	5.05687e+06	5.39948e+06	3.83758e+06	4.23505e+06	3.13283e+06	4.64458e+06	4.02342e+06	3.08847e+06	4.18479e+06	4.14567e+06	3.63353e+06	4.14868e+06	3.15238e+06	4.65883e+06	4.42075e+06	3.17243e+06	3.09832e+06	3.2096e+06	2.50084e+06	3.47817e+06	2.46919e+06	2.77545e+06	2.87187e+06	3.29324e+06	3.16423e+06	3.33512e+06	3.16161e+06	4.09113e+06	3.76125e+06	3.06191e+06	4.55146e+06	4.78508e+06	4.61264e+06	2.91798e+06	3.20272e+06	3.12271e+06
7.88_1401.9794n	2.60491e+06	1.64712e+06	823797	1.09034e+06	1.28592e+06	821256	1.46912e+06	1.24452e+06	3.29981e+06	1.02404e+06	1.68347e+06	3.81328e+06	1.8089e+06	4.60107e+06	6.25389e+06	2.36274e+06	3.77871e+06	1.82645e+06	5.07181e+06	3.12835e+06	1.82743e+06	4.41232e+06	3.56623e+06	2.77058e+06	3.91747e+06	2.3105e+06	4.58815e+06	4.33936e+06	1.96019e+06	1.73529e+06	2.08744e+06	1.28743e+06	2.95485e+06	1.15234e+06	1.33943e+06	1.50115e+06	1.78749e+06	2.04923e+06	2.10475e+06	2.19199e+06	3.30782e+06	2.27139e+06	1.61877e+06	4.60968e+06	4.54859e+06	4.28223e+06	1.30063e+06	2.22286e+06	1.25414e+06
7.88_152.0619m/z	24897.4	18666.6	14265.5	13757.3	20376.9	12704.2	21775.4	16716.5	31172.4	17208.7	19096	29570.3	21686.2	32405.6	36388.6	26659.7	27271	19845.2	34756.5	24467.2	20463.7	30041.5	29824.5	28223.1	31309.3	27322	34565.3	33644.8	22053.1	19984.6	20810.9	17499.7	25867.7	10878	18606.8	17781.6	21370.2	21725	21007.9	20088.1	31884.3	20848.4	16136.1	29427.6	41072.5	32846.7	21228.5	24548.2	20105.9
7.88_1554.1447m/z	202772	224908	545970	486340	396129	72157.5	291094	212557	31280.1	551168	333854	161255	136260	198835	111675	427143	253454	280440	237250	153059	397924	166925	172822	70069.6	423584	221821	194564	179885	402611	516139	156842	620038	34880.3	321109	334392	111315	38983.1	422191	301530	290203	159258	711832	460925	131299	93757	101773	476315	40226.9	269291
7.88_327.0783m/z	377556	296122	220743	236844	296417	246326	302311	258495	406413	274313	311103	442201	305422	511478	578678	375040	436649	309011	497708	402446	308574	460607	425156	382066	420000	332124	501976	475058	343261	321064	317809	242782	356564	201885	275134	287486	312330	293249	344315	309010	446010	370177	285219	465825	503113	463175	289450	331031	318608
7.88_383.1410m/z	266057	215671	159233	150944	218362	177449	227131	196714	301865	186266	222522	353775	226559	391493	424298	292872	331772	250092	377720	297687	216853	331162	322151	282945	306490	245764	368647	358538	228388	232125	266606	179931	269910	174236	202170	193628	229863	224739	262414	220826	291858	247608	221750	356185	375832	364654	199271	246909	239799
7.88_439.2041m/z	665166	568069	436189	433953	549546	493092	591416	524544	733736	486690	597323	874971	577585	964445	1.03487e+06	711128	784167	562644	879989	720500	567924	765216	745907	684098	764037	564104	890567	809107	596046	561515	574919	443064	665360	428489	508607	522220	631888	583216	635657	590682	785341	685580	549415	827431	910400	854669	518462	572652	552665
7.88_494.2600n	2.01316e+06	1.61074e+06	1.29974e+06	1.23807e+06	1.67807e+06	1.43722e+06	1.73533e+06	1.54605e+06	2.2703e+06	1.44005e+06	1.74266e+06	2.51819e+06	1.73874e+06	2.85755e+06	3.08818e+06	2.12783e+06	2.39784e+06	1.72215e+06	2.65576e+06	2.20376e+06	1.66389e+06	2.33081e+06	2.24657e+06	1.99794e+06	2.29109e+06	1.76927e+06	2.65767e+06	2.55589e+06	1.7826e+06	1.68372e+06	1.89625e+06	1.30905e+06	2.0786e+06	1.28453e+06	1.52716e+06	1.6115e+06	1.84844e+06	1.72362e+06	1.86449e+06	1.7224e+06	2.38071e+06	2.03749e+06	1.67118e+06	2.48099e+06	2.73519e+06	2.63587e+06	1.54077e+06	1.83445e+06	1.66195e+06
7.88_662.4481n	6.24639e+07	5.19261e+07	4.30986e+07	4.34913e+07	5.2764e+07	4.91705e+07	5.47318e+07	5.10776e+07	6.63572e+07	4.76107e+07	5.68748e+07	7.9316e+07	5.18992e+07	8.47474e+07	9.5542e+07	6.92154e+07	7.35748e+07	5.70628e+07	8.88864e+07	6.99555e+07	5.67309e+07	7.49579e+07	71733494	6.56279e+07	7.5426e+07	6.01886e+07	8.2253e+07	7.99666e+07	5.83786e+07	5.35629e+07	5.81033e+07	4.54357e+07	6.33872e+07	4.33343e+07	4.92305e+07	5.1265e+07	5.78058e+07	5.49252e+07	5.84574e+07	5.30211e+07	7.16063e+07	6.16449e+07	5.51651e+07	8.21562e+07	8.16229e+07	8.04017e+07	5.15967e+07	5.94978e+07	5.5989e+07
7.88_664.3663m/z	29693.5	20539.4	13611.8	37304.1	25321.5	10086.6	8803.78	6279.06	37581.7	14327.4	47687.1	71522.2	30012.8	49712.9	50433.3	45203.8	37453.7	48485	64270	59849.1	49583.6	38744.9	97333.2	84490.3	72997.5	100121	90371.9	137071	130505	25200.5	19760.5	17704.5	11151.8	5105.98	3460.18	13372.4	36473.9	34268.8	57035	26042.7	180189	74254.1	26101.3	59429.5	54776.7	31286.4	14769.3	21884.4	13076.2
7.88_788.4158m/z	23489.4	28357.8	24645.8	24602.2	33769.1	27168.2	12861.8	19863.7	9927.8	23928.6	19512.4	32499.2	22801.5	25364.7	19069	31777.3	36760.2	21780.6	17780	34908.7	21134.5	32903.5	18227.3	14894.5	9168.98	12624.4	20403.9	10717.2	9576.98	20709.5	13712.3	23264.2	19775.8	48714	15664.9	22622.8	22811.2	23322.8	38767	33642.1	8670.19	16993.5	28632.4	25134.1	27538.5	18674.1	3971.97	11424.7	42339.6
7.88_899.5331m/z	712405	524525	402472	406463	555839	476479	612114	514956	823760	481631	646791	772602	628421	1.00357e+06	889459	605010	713177	568319	795689	695410	562688	764733	656693	703472	683670	585137	754059	751327	587726	521369	599608	449163	682406	437916	486560	564392	608421	707982	651830	555178	698775	629037	502226	669657	801865	831952	500722	693660	563985
7.89_1536.1179m/z	131181	163906	411744	344793	301528	192433	146169	169210	96891.5	293448	329925	99292.8	104333	113773	75715.9	169569	71383.6	154279	97666.7	124258	478066	92463.7	479914	119519	319236	107823	87254.1	206388	398233	441511	177794	567083	89360.6	167156	271800	197230	110200	405968	188952	225189	94487	482488	249050	76209.6	51163.3	94903.2	203530	133433	159045
7.89_768.5611m/z	1.13866e+07	1.02303e+07	1.52643e+07	1.44971e+07	1.3357e+07	1.13541e+07	1.26983e+07	1.46235e+07	8.27774e+06	1.41642e+07	1.23414e+07	1.07429e+07	1.01582e+07	1.08055e+07	1.01983e+07	1.52582e+07	1.22979e+07	1.80272e+07	1.18786e+07	9.60355e+06	1.69033e+07	1.15385e+07	1.2135e+07	1.11741e+07	1.44383e+07	9.5866e+06	1.08859e+07	1.25703e+07	1.73326e+07	1.93591e+07	1.14035e+07	1.79599e+07	7.46472e+06	1.26343e+07	1.11757e+07	1.14005e+07	7.91992e+06	1.47348e+07	1.17426e+07	1.31029e+07	1.21304e+07	1.80506e+07	1.51744e+07	1.16425e+07	1.10832e+07	9.51397e+06	1.3775e+07	9.25488e+06	1.20031e+07
7.89_789.5305n	912029	974967	1.00467e+06	1.07964e+06	1.21964e+06	712153	1.08894e+06	957851	834754	1.17752e+06	1.02476e+06	986596	771703	1.05762e+06	894841	966780	1.18088e+06	1.03073e+06	910290	813451	1.03513e+06	816064	960537	861245	1.10798e+06	992630	934009	811164	1.09511e+06	933502	986423	1.0683e+06	826252	1.10409e+06	1.00642e+06	890654	922907	990167	995351	972386	945292	1.3409e+06	1.10161e+06	896444	1.01137e+06	920728	1.04117e+06	720746	1.00425e+06
7.89_848.5067m/z	107956	76298.1	90418.7	67360.7	97730.9	66949	84974.2	52840.4	107107	54240.9	81444.3	102430	85732.3	119656	101867	93866.7	109801	124625	115592	107152	114622	97038.3	89157.8	137428	158520	121146	128941	98064.4	108262	88317.9	72530.5	82474.7	111432	74373.4	82231.2	58976.1	80531.2	48636.9	79131.3	78900.4	96085	137566	68446.2	122970	95393.6	126521	64769.5	86468.2	74558.6
7.90_1513.1137m/z	33699.1	15795.4	83973.5	76109.3	41868.4	15610.2	45688.3	20568.3	5657.21	53022.4	38780	12321.7	39031	18319.6	15411.4	39894.6	27400.5	62943.6	17175.6	22828.7	115261	21125.8	50973.5	24253.2	34693.7	3798.2	33172.8	60291.7	79107.9	75183.2	10878.5	58748	6888.67	29162.7	35117.1	30868.8	20396.6	64348.4	14462.7	58599.8	26529	112482	44607.3	44557.8	28112.3	16040.9	61252.8	39928	38237.3
7.91_962.5028m/z	16074.4	20258.2	10293	17017.5	16535.5	20502.2	19186.3	16073.6	18429.9	21135.7	8681.18	25655	26155.1	22757.3	14208	12993	20601.4	16946.6	10486.6	24215.6	17084.9	19760.4	15501.7	21970.1	22115.3	21419.4	29922.6	15384.8	17580.2	13877	15134.8	5891.79	16000	25972.8	15304.9	26781.5	12483.2	18889.3	24453.5	17036.4	16841.4	14338.4	14722.8	18553.8	21845.7	7209.78	19184.3	14987.8	24641.4
7.92_777.6340m/z	386219	362022	707004	366586	252813	549707	357554	523728	405308	309923	490477	256117	376169	351726	314479	423037	488472	408075	331297	492112	676718	364038	567953	439959	310879	388351	370524	473036	467355	673696	599201	361754	345786	283181	318655	477652	273487	402419	259035	509861	370559	344359	393574	443523	387147	492141	429583	564238	426583
7.93_743.5736n	1.13677e+07	1.12949e+07	1.46632e+07	1.5983e+07	1.75438e+07	1.81821e+07	1.37431e+07	1.73406e+07	1.30081e+07	1.56615e+07	1.45974e+07	1.46308e+07	1.32662e+07	1.18236e+07	1.27517e+07	1.71649e+07	1.49419e+07	1.74255e+07	1.38271e+07	1.39105e+07	2.00432e+07	1.51465e+07	1.53384e+07	1.37512e+07	1.38062e+07	1.26832e+07	1.35024e+07	1.41114e+07	1.74319e+07	2.02073e+07	1.25837e+07	1.53726e+07	9.52564e+06	15948827	1.51414e+07	1.39689e+07	1.01433e+07	1.41919e+07	1.13686e+07	1.42719e+07	1.51556e+07	1.57584e+07	1.47613e+07	1.49957e+07	1.41829e+07	1.2076e+07	1.37399e+07	1.27189e+07	1.37138e+07
7.93_745.0827m/z	17194.8	14740.4	43864.4	33617.8	30677.7	13253.4	12166.9	8712.24	8591.31	15448.1	14379.6	21155.7	11927.1	18001.2	28158.1	12889.1	11810.2	6607.24	10656.6	11735.8	31265.6	14936.2	10721.3	15084.4	9169.6	17309.9	22102.5	31388	15728.1	96990.9	12617.5	24515.7	9947.2	27396	16693.7	29532.1	4889.11	4499.16	2883.14	8888.24	23480.1	4124.21	31222.2	34465.4	42011.2	10243.5	4340.01	6498.13	10573.7
7.93_804.6637m/z	155818	185163	205218	250364	142572	253914	153359	274911	176968	211691	183625	161477	192714	223066	244783	235256	159042	301367	189256	152218	269035	234929	221505	220892	144979	169163	191148	173392	217370	310609	205050	216171	130060	174537	172556	267673	190390	123023	146502	255465	289536	213258	216226	280202	183532	226913	201823	180023	196458
7.93_938.6185m/z	156345	157222	166378	166153	196605	246949	186849	233784	227214	189802	178092	214262	217847	192709	202283	255982	208704	250805	175137	160129	231269	219577	217326	223106	174032	169456	178055	185307	267756	255157	187404	166365	145563	177936	126494	207700	156733	130263	171643	159305	258201	137708	211457	237940	231775	203735	153368	184092	192578
7.94_964.5585m/z	70314.2	68037	65015.3	46851.8	59410.2	73321.8	80066.2	77546.4	64990.6	71011.2	75286.1	62160.3	67730.3	90009	77952.2	81053.6	71831.5	65438.5	53990.2	74245.1	54635.9	63964.4	81390.9	81944.4	76007.8	73744	58605.5	72780.9	70138.5	66189	77091	62645.8	55438.7	71507.9	62595.1	84221.2	73407.7	68026.5	74394.8	81030	64678.2	57109.9	73660.4	77925.4	66540.9	72803.6	65566.4	72481	67758.1
7.95_1488.1142m/z	18963.1	39511.4	59933.8	79535	223770	86603	58331.1	59585.8	18661.9	127143	117483	73862.6	72085.9	50833.3	38664	77246.2	78087.3	132107	66286.9	73547.9	141237	57603.8	61604.2	41097.6	113834	74941.1	102049	66119.3	108391	137486	31427	115366	19946.7	99280.4	79882.3	33831.1	23242.7	121679	40333.2	50625.9	78124.2	222935	41668.1	76696.3	47951.9	24325.7	27194.3	10159.8	67562.7
7.95_1496.1259m/z	16906.2	11913.4	43130.1	31404.1	30656.2	35941.6	12998.2	20296.9	24558.1	34205.3	68434.2	17852.3	20604.2	34636.8	19103.1	27307.9	37193.5	35752.1	7521.74	15957.3	85162.5	34314.3	45967.9	25939.3	19860.2	42244.8	19706.6	21745.3	46082.7	44631.5	30043.7	29323.2	10201	18453.9	22234.3	26803.1	22145.2	32246.8	9524.1	48282.1	31978.3	32919.8	21535.6	25751.6	16202.1	9839.23	32499.8	19683.4	24065.5
7.95_1520.1156m/z	20001.5	31996.2	127776	77652.7	69221.5	120421	41900.7	48573.6	50547.2	82516.3	105762	26865.3	54884.4	23219.6	38042.3	50482.2	55211.3	79465.4	42965.1	74606.9	225287	49737.1	99682.6	66013	69115.4	72050.1	66955.5	74958.6	115542	96911.7	45951.7	60395.1	15052.9	31454	65063.9	83976.3	19837.9	81570.4	18431.6	103831	46296.3	75921.9	59128.9	62853.7	27627.9	55289.3	57419.4	43342.9	66700
7.95_385.2770m/z	38931.7	36569.7	37608.3	27078.1	33511.3	38233.3	37579.9	40452.1	41832.2	30980.3	31962.4	34558.1	37185.2	36715.5	37498.4	37674.7	41569.6	40042.2	32381.7	37257	43915.9	37070.7	39604.5	49898.6	37595.5	44760.1	40686.4	43109.3	41706.9	44751.8	48954	36162.1	39687.3	30144.5	31568.1	37982	33529.4	34355.1	37189.1	36396.4	37807.1	33743.5	41608.3	36559.3	37858.9	37729.9	33194.4	43315.5	39403.6
7.95_603.5358m/z	600649	780331	836076	1.08186e+06	1.77504e+06	536415	951650	791518	512269	1.33437e+06	975966	963553	555813	491278	380655	870607	896345	903225	783353	1.06645e+06	923735	683001	523364	567333	1.16928e+06	1.03892e+06	1.01399e+06	721442	940020	819083	618606	1.19014e+06	627757	1.15479e+06	1.40356e+06	502978	572393	1.25583e+06	921922	959970	707864	1.51944e+06	741967	612587	662260	570887	812431	492269	875095
7.95_775.5574n	7.1363e+06	6.5992e+06	1.20929e+07	6.08115e+06	4.5179e+06	8.99263e+06	6.48415e+06	8.5922e+06	8.5029e+06	6.52014e+06	8.49264e+06	5.33823e+06	7.32094e+06	6.76481e+06	6.85122e+06	6.98036e+06	8.06795e+06	7.9656e+06	6.14643e+06	8.38078e+06	1.23932e+07	6.79977e+06	9.6941e+06	7.46925e+06	5.70474e+06	6.64855e+06	6.8628e+06	8.31691e+06	7.6343e+06	1.0725e+07	9.88872e+06	6.36369e+06	6.37424e+06	4.9823e+06	6.43107e+06	8.14139e+06	5.66744e+06	7.83139e+06	5.42821e+06	8.3463e+06	6.26773e+06	6.77653e+06	8.56102e+06	7.71896e+06	6.77674e+06	9.42652e+06	6.98408e+06	9.02172e+06	6.89456e+06
7.95_892.5694m/z	123410	131129	89372.1	79057.7	97002	129210	115352	99183.2	123524	102119	91825.5	117434	142805	107034	115851	123510	128611	113916	90505.7	110327	80320	111051	108692	122419	120239	136995	110509	131906	106503	85412.1	115859	101007	108652	106519	85712.3	116453	118591	86111.8	104004	128787	113886	100518	101998	95694.2	124820	115517	104038	119129	107345
7.96_746.5415m/z	8985.39	22136.4	21587.8	20362.4	55422.5	7280.96	13264.8	17042.1	22181.2	28692.1	10951.2	22998	8292.69	7368.01	11037.8	8374.93	11156	17911.2	15010.8	16206	9525.16	14814.3	11957.5	27314.3	15595.5	19148.3	13505.5	12019.5	19448.9	18073.1	10717.7	14289.6	8021.31	17844.3	32866.3	12548.7	11361.7	4080.21	33651.6	18796.2	9088.86	36282.9	12486.9	8956.15	15075.8	6120.89	26856.8	4888.75	17760.2
7.96_788.5199m/z	110618	121220	125990	100695	182490	118030	172488	138140	136142	143911	120073	180834	123408	132014	138990	129022	139159	150081	97244.8	154306	156646	145691	108066	139554	150811	171283	168314	102223	120926	90197.5	152501	128539	118995	142466	137280	94733.8	134605	130037	188265	157134	171614	120311	120048	114172	132847	136601	87087.4	121395	154279
7.96_915.6236m/z	208000	228578	212213	179658	240165	247457	225279	227826	228913	179911	164444	202777	238497	260405	243875	225043	217218	216507	194802	195140	205945	256490	201024	255529	195515	214505	216137	192248	226043	189836	232001	216409	246718	188889	162453	213365	224170	162537	195376	186636	268555	226520	203352	204616	232881	213482	163124	184975	200756
7.97_452.4835m/z	1.40215e+06	1.34663e+06	1.00792e+06	932919	1.26382e+06	1.62471e+06	1.50668e+06	1.76492e+06	2.10863e+06	1.60746e+06	2.16781e+06	4.30675e+06	1.48406e+06	4.64821e+06	5.81348e+06	4.09361e+06	3.87676e+06	2.12067e+06	4.06818e+06	4.45433e+06	2.01626e+06	3.38803e+06	3.52442e+06	3.07426e+06	3.62338e+06	2.17552e+06	4.17584e+06	3.89616e+06	3.04604e+06	1.77019e+06	1.35637e+06	1.46578e+06	1.63805e+06	1.60704e+06	1.43598e+06	1.55435e+06	1.77987e+06	2.88188e+06	1.90097e+06	2.67253e+06	3.51633e+06	3.06893e+06	2.08592e+06	3.89604e+06	4.12027e+06	4.40235e+06	1.78286e+06	1.56512e+06	1.75101e+06
7.97_819.5788n	484130	492340	800708	489479	492290	608022	419105	635835	659751	604615	546638	457351	558387	520812	521606	483488	484208	606027	565862	618542	711434	519772	610763	554176	470180	496233	479191	391897	487502	622895	649684	431616	475093	400512	476461	705714	417684	558127	457958	727570	519428	469542	527224	588756	525322	659913	463276	551296	574623
7.98_474.4629m/z	35659.5	33219.8	14286.4	12184.8	27245.1	25563.5	33726.8	31745.2	35815.3	25110.8	25004.5	49749.7	23316.8	45700.7	61817	41991.4	40538.7	32600.6	43398.3	39476.8	22847.5	40376.3	38340.3	32112	34429.3	27598.5	44919.9	32767.1	38224.2	23167.2	35364.8	26903.2	30960.3	23142.6	22856.1	33670.2	36210.2	32280.5	30348.9	32200.7	38883.5	32767.1	26932.3	35116	39384.7	36815.9	26525	33052.9	31538.9
7.98_936.6017m/z	138472	119437	124562	93055.8	136193	132426	136641	137699	140742	112364	114792	143759	131934	137067	137425	125895	129581	149650	141393	129094	122760	144240	125540	147026	140591	131546	153599	138179	144254	140196	124896	125939	130321	91081.2	119926	133907	147349	106989	139467	100531	132389	114720	132108	133228	151309	129378	115027	133036	125154
7.99_939.6295n	561814	475583	639116	673520	720125	877269	595931	707285	693902	621064	625633	573416	710016	666941	699803	649526	541065	768876	570492	603861	788121	736572	738902	704558	483642	569475	511209	555653	697716	658697	568672	605510	553822	654845	549005	725712	637607	523549	450294	631737	774043	579262	610787	682012	602106	579805	537943	596230	692742
8.00_114.9517m/z	11917	14622.9	11245.2	7702.59	12284.9	14906.8	12916.5	10429	14498.3	9218.67	11205.7	12509	12572.4	12824	11211.8	9941.9	13537.9	12879.2	15233.8	14778.1	12433.7	13236.2	13322.6	10876.2	10982.5	12313	12003.9	12992.3	11727.5	9786.99	14472.2	14674.1	13517.5	9630.85	7474.72	11848.8	12404.4	11926.8	15368.9	10776.4	11192.9	9970.85	12088.3	12663.5	10184	14639.2	13218.2	12113.9	11202.1
8.00_455.4269m/z	42072.1	41520.4	34293.9	35207	50370.9	41058.9	47711.7	46261.4	45864.6	37107.7	37159.8	42416.2	38706.1	37665.6	44144.1	46204.3	45552.8	37539	39913.4	37579.5	36418.6	41675.3	35042.6	42004.1	38794.1	39134.9	42684.4	30140.5	34440.4	29792.4	38094.8	47336.6	55841.4	38874.1	46476.8	42429.2	49620.4	37963.3	41263.2	39038.4	38540.3	38219.6	44275.3	33712.3	39184.6	37204.2	32612.2	33102.2	30769.8
8.02_1015.6669n	744156	640265	708028	604249	720998	642758	668144	785444	764068	673390	654017	605903	708817	741828	654309	702776	691959	764088	620574	626603	648539	683058	675664	674403	618594	637127	685020	630582	654023	692532	684850	689062	651559	646329	636968	701455	693462	576987	670028	660788	759610	675344	673568	668388	641018	660152	590785	696672	681998
8.02_828.5913m/z	159824	94637	205868	138220	116051	120781	140455	130448	122275	87883	124728	66623.8	123978	110128	108530	79597.9	115662	103734	80538.2	85866.3	142311	94000.4	199382	117728	126485	159934	111583	69883.2	141217	126519	150986	165285	103731	114145	136711	89084	66940.2	103733	81714.9	121767	92449.5	93005.8	121451	99243.8	98055.7	68077.8	70584.2	97027.2	68533.9
8.02_963.6284n	243629	224160	289330	240631	210839	372195	261156	381585	269219	263635	321025	290555	288317	289833	290297	320031	277046	416346	256246	251782	344372	295542	345297	333012	252087	242969	268029	328810	330516	408822	274509	280678	208076	275811	268317	331891	256179	257846	240843	315950	329227	231508	296913	359195	290740	258668	233237	253698	258147
8.02_989.6452n	1.51423e+06	1.26755e+06	1.57476e+06	1.40618e+06	1.25494e+06	1.46484e+06	1.432e+06	1.87466e+06	1.60449e+06	1.30558e+06	1.42092e+06	1.24566e+06	1.41624e+06	1.61774e+06	1.37663e+06	1.56062e+06	1.44442e+06	1.7964e+06	1.27514e+06	1.21854e+06	1.86101e+06	1.41683e+06	1.64129e+06	1.46508e+06	1.13988e+06	1.27123e+06	1.27765e+06	1.55985e+06	1.50319e+06	1.61705e+06	1.3862e+06	1.41087e+06	1.19474e+06	1.10061e+06	1.22946e+06	1.49677e+06	1.43768e+06	1.61071e+06	1.29538e+06	1.57595e+06	1.50534e+06	1.6277e+06	1.52713e+06	1.42901e+06	1.38637e+06	1.1932e+06	1.36938e+06	1.60524e+06	1.31844e+06
8.03_1080.7443m/z	82910.6	70458.8	89526	51920.8	80664.3	57550.8	89212.9	91469.6	90502.8	84556.4	77567.2	69134.7	96963.3	77715.7	96121.1	129255	112731	108656	93920.4	84598.7	105160	87590.7	111649	107260	101778	128994	126502	149200	150530	210685	96817.3	84643.9	84360.8	78780.5	61219.7	82481.3	63311.1	61195.9	79663.7	66640.7	87575.3	61695.9	68295.1	128994	107171	127332	65103.6	98974.5	108141
8.04_732.5887m/z	361084	369741	423455	388366	299055	467978	352222	553519	405416	482327	425725	315085	355084	535442	387462	399767	344720	431108	333375	331339	519384	399019	570195	438817	318717	315941	322976	343881	479976	489909	362774	289462	291742	309588	405052	500402	333142	349216	312389	683007	470446	346992	389663	480339	319539	382630	429206	477537	328146
8.06_890.6468m/z	298872	269554	238685	220150	254795	263861	282533	233262	273495	254835	219785	289410	288063	270246	271388	248634	261044	250182	269294	260181	229879	285927	233685	261628	245139	255307	273368	241949	260075	209671	265081	281259	274163	253204	240921	240115	247974	210834	290013	215454	236247	230316	243500	254616	268274	275470	225817	253562	232331
8.07_848.6545m/z	7.19665e+06	3.78327e+06	8.40389e+06	6.4962e+06	5.88116e+06	5.67847e+06	5.92953e+06	9.60622e+06	5.26453e+06	4.08389e+06	5.93926e+06	3.6826e+06	6.35959e+06	6.43458e+06	5.66459e+06	6.20341e+06	4.11067e+06	7.33816e+06	5.11711e+06	4.16958e+06	6.22466e+06	7.75355e+06	7.89891e+06	5.94719e+06	4.4232e+06	6.0945e+06	4.10087e+06	6.07437e+06	5.30984e+06	6.63438e+06	5.14518e+06	6.9748e+06	5.59021e+06	6.25692e+06	4.74423e+06	4.80757e+06	4.51985e+06	5.28999e+06	4.31402e+06	6.33973e+06	6.92982e+06	6.44485e+06	6.28587e+06	5.29256e+06	5.34152e+06	3.74201e+06	5.03205e+06	6.03231e+06	5.35859e+06
8.08_535.2582m/z	38132.3	39955.8	26921.4	21622.6	32885.1	33690.2	36021.6	35503	37648	30692.1	32403.1	33613.4	36226.8	37152.1	29831.9	33956.1	28310	33998.5	26010	31493.8	27865.3	33801.9	29968.5	28660	12967	34571.9	29675.4	30833.6	24203.4	28900.8	35221.4	33646.1	32113	25287.8	33261	38490.5	38508.7	20722.9	29016.2	23178.8	34925.6	27461.9	34193.3	25752.9	41928.6	37199.4	28269.8	30999.6	26370.1
8.09_735.6030m/z	197742	180788	225814	173775	164739	255304	181676	288657	218600	253362	207588	162255	200435	295931	210274	208388	187876	241251	181460	197739	277077	213630	352399	264002	162581	208524	189784	187556	236815	217546	198853	163066	207251	163093	199632	246215	220856	193813	156473	397683	282456	204603	223672	261162	201539	250556	227491	229100	216333
8.09_772.6232m/z	1.54614e+07	1.39369e+07	2.35118e+07	2.34292e+07	1.87774e+07	2.49209e+07	1.67185e+07	2.62709e+07	1.85537e+07	2.34399e+07	2.554e+07	1.67497e+07	2.11421e+07	1.9987e+07	1.64546e+07	2.12607e+07	1.76918e+07	2.87214e+07	1.57142e+07	1.83338e+07	2.67983e+07	1.99737e+07	2.83652e+07	2.09351e+07	1.48972e+07	19405799	1.69878e+07	2.03121e+07	2.02352e+07	2.19771e+07	1.88824e+07	1.93651e+07	1.4918e+07	1.80154e+07	2.04708e+07	2.64438e+07	1.83798e+07	2.06811e+07	1.51246e+07	2.90085e+07	2.74614e+07	1.87449e+07	1.89949e+07	2.69192e+07	1.69044e+07	1.97575e+07	1.80847e+07	1.77749e+07	1.90902e+07
8.09_966.6516m/z	560027	490404	591563	528344	544250	706023	585603	757580	631316	601546	685802	566981	640672	613624	538574	684630	597176	825869	471233	572920	696757	591890	743383	696897	538312	610955	610052	608904	613494	627607	609795	550766	539991	485776	557338	689609	614969	567623	546247	710607	824354	555956	600108	665779	596632	606137	561596	640181	584183
8.11_772.7145m/z	23275.4	18427.3	36234.4	36484.9	23585.1	55648.2	24029.9	56917.1	26871.7	42843.4	42765.5	30870.2	19203.8	38005.2	32963.3	42280.6	41509	59542.6	53110.6	36133.4	67359.3	27516.1	82781.8	49192.5	35955.8	57377.5	49072.9	80591.8	54314.3	62690.7	40659.1	26017.6	26059.7	21930.5	19413	28808.8	30605.6	91352.5	28409.5	66303.8	79188	47665	47911.5	38279	36113.8	17707.8	55784	37797.2	34325.8
8.11_786.5940m/z	1.28738e+06	1.13722e+06	1.68416e+06	1.32346e+06	1.48703e+06	1.65121e+06	1.47582e+06	1.43742e+06	1.02499e+06	1.81859e+06	1.45972e+06	1.40533e+06	1.36547e+06	1.05748e+06	1.19779e+06	1.42883e+06	1.42479e+06	1.64067e+06	1.0496e+06	1.50184e+06	1.46524e+06	1.33611e+06	1.78953e+06	1.42545e+06	1.26116e+06	1.26339e+06	1.35127e+06	1.57602e+06	1.27775e+06	1.41462e+06	1.13575e+06	1.47164e+06	1.17962e+06	1.44463e+06	1.4945e+06	1.07006e+06	1.31582e+06	1.4362e+06	1.60888e+06	1.76266e+06	1.44447e+06	1.3397e+06	1.63999e+06	1.49016e+06	867865	1.09091e+06	1.30711e+06	935776	1.34254e+06
8.11_800.5529m/z	198462	240898	383877	282860	178294	317587	251878	329213	227794	300706	343928	211396	237230	258973	245397	250311	242390	281233	137400	228886	438156	252200	369297	173326	167436	245325	179901	243018	221008	329163	199059	254332	198004	200923	227357	314016	205318	369908	189691	300123	211168	291398	286667	251454	193629	248189	193303	258067	165073
8.13_745.5093m/z	25832.6	27801.8	39121.4	19681.3	28402.7	35388.8	17091.1	34575	31120.6	31594.9	25328.4	25275	29518.5	28748.3	32046.8	23963.1	30772	36175.1	31553.4	27598.6	31648.1	30562.6	32759.7	27735.1	32294.2	29360	26974.5	38113.7	43251.7	41259.3	40968.7	31538.1	28616.6	29419.3	17671.7	29900.5	30797	19591.8	26069.7	28870.6	33670.8	23787	30915.7	28569.6	26567.2	30835.5	29944.5	34061.3	29320.3
8.14_878.5884m/z	320693	345705	307833	274334	408778	268258	268347	315447	290225	359244	314004	387106	408627	357532	293379	358412	321533	371264	308889	346607	291734	324524	320380	326698	329919	364891	310672	309564	318371	277830	296202	262379	304797	288700	321911	236429	304223	444192	330694	341567	339912	311641	302166	320921	306270	314368	315814	272485	287670
8.15_728.5609m/z	1.93486e+06	2.63663e+06	4.11471e+06	1.86176e+06	2.45224e+06	5.75452e+06	2.86665e+06	4.20453e+06	3.71414e+06	3.31018e+06	5.2176e+06	3.8073e+06	3.9347e+06	2.52276e+06	2.58381e+06	3.67055e+06	3.18505e+06	4.64513e+06	1.75559e+06	4.06076e+06	5.52502e+06	2.91296e+06	5.03126e+06	4.62862e+06	3.45916e+06	3.68968e+06	3.88888e+06	4.74676e+06	2.87986e+06	4.54138e+06	4.42262e+06	2.51826e+06	3.54604e+06	2.68176e+06	2.52787e+06	3.19666e+06	3.8145e+06	3.41634e+06	2.28872e+06	4.13989e+06	3.99041e+06	2.78983e+06	3.34647e+06	3.63811e+06	3.1528e+06	4.57406e+06	2.96939e+06	5.29454e+06	3.17109e+06
8.15_872.5706m/z	66532.5	77596.4	93085.2	101857	165086	98750.5	73114	60360.7	68124.4	116968	111688	122980	89118.6	83891.6	62364.6	88925.1	60765.9	84402.7	76378.7	118200	114726	76799.2	81599.1	72840.9	98037.3	110182	82864.8	77559.6	80553.3	71614.5	86651	57559.9	76101.5	97285	142895	81042.7	68258	192421	93867.8	130591	78649	88345.9	65264.5	81776.3	62295.3	66698.2	90740.8	66306.7	71034.7
8.16_788.8873m/z	216715	227514	377072	980114	1.1924e+06	383455	205337	241265	180338	366907	902841	608069	450653	210874	187980	298538	172939	291829	245975	354050	305283	158221	306708	222065	226548	408222	247730	236972	238834	333774	243103	225473	137113	355914	2.0241e+06	264411	160116	1.18112e+06	266819	785271	213344	340276	201708	641076	130467	204353	243954	162269	189618
8.16_970.7253m/z	228423	159575	201122	196823	241043	250016	250416	293006	254945	262205	213418	220950	198574	282815	345391	198802	248132	249238	225607	206777	257071	250456	247508	284396	253447	235736	265786	233798	268868	279314	211413	287156	247525	217137	230852	221976	271621	129851	240929	254995	248636	176274	248391	293624	243303	296036	228025	251511	260017
8.17_1227.4664m/z	27198.2	58077	56288.8	46557.5	32138.3	44399	20878.6	14149.1	11136.2	9522.79	10802.7	12237.8	16667.1	17390.5	50151.1	24628.7	2849.94	32060.5	13230.7	11359.6	11584.1	13260.4	10440.9	7991.84	12927.8	13697.7	8343.19	26981.9	29811.1	27827.4	32330	73149.1	53038	23407.9	16443.4	11299.6	11240.9	6379.75	11159.8	18926.7	3843.49	17052.7	19102.5	24437.5	12440.1	16734.9	28796.7	7948.3	10321.1
8.19_748.5595m/z	1.49063e+06	1.47448e+06	1.92735e+06	1.84758e+06	2.14316e+06	2.43944e+06	1.6138e+06	2.10069e+06	2.1515e+06	1.88843e+06	1.82031e+06	1.74338e+06	2.20346e+06	1.89863e+06	1.87363e+06	1.9279e+06	1.65976e+06	2.55792e+06	1.55937e+06	1.49572e+06	2.27849e+06	1.86807e+06	2.23768e+06	1.61736e+06	1.38723e+06	1.60965e+06	1.59553e+06	1.66884e+06	1.9907e+06	1.83614e+06	1.59209e+06	1.65074e+06	1.58833e+06	1.7929e+06	1.64712e+06	1.95588e+06	2.13406e+06	1.43498e+06	1.57559e+06	2.01085e+06	2.43825e+06	1.81698e+06	2.07046e+06	2.02683e+06	1.78567e+06	1.8048e+06	1.46225e+06	1.62413e+06	1.54814e+06
8.20_574.4466m/z	139727	135968	113311	110115	134746	99028.1	124840	135509	140906	126403	103338	118532	132736	156678	137394	135238	136568	162725	164765	127770	140179	142560	130487	144166	128059	134332	148542	123104	162979	127683	114750	127876	146565	101107	94110.5	109333	131155	122685	129960	125728	122965	115903	159579	116203	132647	174582	114112	157566	141721
8.21_244.1219m/z	30993.7	31726.4	25169	19185.5	35584.7	21664.9	27180	31667.4	29238.5	29753.4	27443.6	29650.5	23015.8	25396.9	28061.2	29203	26592	29163.3	27671.4	24101.2	22754.8	26244.5	28604.7	27712	25272.8	28105.8	25523.9	29371.4	24279.1	26907.8	24651.8	24734.6	36086.5	22553.4	23307.7	25937.5	31227.2	21662	32630.5	23641.7	31058.5	25465.3	25383.4	22749.3	24249.9	36248.9	30106.7	29896.6	22558.1
8.21_670.5585m/z	97585.7	81822.5	69507.1	72831.2	94217.7	79505.3	78186.6	73258.2	76738.1	75363.3	59757.8	75337.4	75480.4	75789.4	83109.9	73139.8	76755.3	64339.6	66220	82049.7	72047.4	78925.6	70034	80830.2	77932.9	88997.4	80675.8	75338.9	75692.8	66248.2	89520.6	89905.1	96901.3	65032.8	48756	72661.1	73738.5	64003.1	78090.4	72988.9	85928.6	85238.5	72760.2	72206.1	73671.5	85522.7	80019.6	79053.2	74997.9
8.21_890.6612m/z	199153	168364	197062	196068	173462	166951	232719	196814	216367	204936	191680	192941	227634	202097	211726	190163	174040	170309	147753	175328	219288	253604	206052	190456	191890	171254	174495	155713	173545	204641	179206	229768	186450	186793	181207	180222	186735	189964	183161	164405	171645	178257	178682	191548	175148	167068	152559	163033	185457
8.23_814.9161m/z	26253.6	39734	77475.6	108108	130204	137630	96871.2	55942.8	39244.9	75475	42434	69456.2	36122	46808.3	44234.1	93353.2	24195.9	72205.3	17891	110818	112444	44280.6	101923	39891.5	98584	92823.9	68821.1	32488	28359.3	89946.1	16276.4	56202.1	32787.1	121131	80119.1	38140.8	48580.6	70528.5	40447	58094	55201.1	54157.2	60614.1	80470.1	14886.5	44160	63236.4	13074.5	32767.2
8.25_455.4257m/z	19911	22326.6	16519.1	16684.3	21770.5	20563	20353.2	22778.6	22708.9	18134.2	22373	22646.7	18572.3	20139.8	22467.1	17484.9	19683.8	23749.6	23731.8	23385.5	16830.4	19289.6	16823.5	24634	23358.3	24546.8	23495.6	21129.6	22878.2	19599.5	23244.2	18593.7	20983.1	17525.8	18336.7	19876.3	21667.2	16442	18896.4	18242	23795.6	18274.6	22584.4	20670.9	22445.1	20722.8	22450.5	21505.5	22654.6
8.26_1120.7709m/z	86193.5	80325.5	79371.1	62905.4	69011.2	80726.8	80923.3	69083.5	69239.1	48533.1	90474	66198.1	60496.4	64780.3	68206.7	61816	54833	87402.6	67144.4	64004.5	65060.4	86196.4	102698	106885	85289.9	98009.7	95809.1	104048	113102	105198	77887.7	81813	79491.5	51953.4	65470.3	66824.7	58794.8	63693.2	60315.5	65952	49065.6	60032.5	72260	84208.7	79794.5	73561.2	71251.3	88832.9	69999.1
8.26_289.1797m/z	47354.7	50409.4	38242.8	29639.2	50971.4	39794.5	46745.8	39919.2	49641.1	47173.5	45499.5	49205.5	40495.3	44674	44351.3	45504.8	45192.5	43232.6	49891.6	47572.7	43364.7	45338.9	41586.7	44685.9	44017.2	49018.5	46324.5	38650.6	49456.2	39104	42046.4	42000	51422.4	36992.3	35976.8	47077.5	48635.1	39990.5	50150.3	40611.5	49201	43247.7	45884.9	41750.8	48254.1	57059.4	43780.3	50937.3	41208.1
8.27_152.9888m/z	16604.3	16899.1	15571.2	12502.1	15360	16385	17874.8	17529.1	14087.2	16578.5	18341.3	18699.7	16243.3	17665.5	14759.3	15268.2	17690.3	18039.3	17656	16982.1	16027.6	16133.6	14399.7	17019.5	17062.7	14917.5	19730.1	16350.9	16894.1	17115.3	16734.7	14682.1	15059	16802.9	14945.5	15818.2	16464.8	15890.8	15977.9	16194.1	18729	14117.1	18458.7	16718.4	17262.9	15606	15498.3	16274.1	16384.3
8.27_466.4988m/z	186549	168734	135620	137908	193901	201327	227413	201950	254490	197239	294702	395320	207736	483815	530926	419203	426965	262476	436057	468296	248550	443914	357337	340874	400707	279126	444980	388382	325358	233652	207249	183448	190330	196924	219866	192049	208342	327166	245997	311624	379840	365421	230345	423059	466984	527143	238608	248204	221683
8.27_623.3076m/z	20475.7	17879.3	19992.4	16379.3	22996.9	21710	26746.4	21082.8	24762.3	20345.1	19359.7	23952	20336.8	23603.1	20396.3	18419.5	20152	23510.1	17731.4	21916.7	20390.1	20353.6	21745	19095.6	19244.6	16239.6	24543.6	17858	17366.9	15981.1	19260.8	12393.2	29307.3	17602	20710.6	19195	23730.7	16569.3	20340.9	19447.5	23043.1	13479.7	21380.7	14680.3	15181.4	26335.1	15926.7	22784.5	23859.2
8.27_793.5892m/z	155539	161895	162825	132171	124729	163822	162416	176518	157752	160751	201228	176655	156596	162236	159311	137968	143295	180730	152805	154666	189586	168413	168702	169284	124302	122439	150684	150062	137455	179053	152918	163692	122139	144248	126450	160308	147088	140918	146004	176946	184857	157161	185162	149856	138701	168802	152233	195226	163588
8.28_573.5322n	99011.9	106141	107398	123750	128544	115028	113048	111560	115734	153244	113965	120966	108639	97761.7	115554	126626	124445	130214	151436	133177	103223	103964	128297	120306	141381	132401	107146	139381	125247	118918	98318.2	99659.7	111898	118026	120349	117957	121828	105543	127942	89215.5	107002	130813	129740	120168	132969	130537	141418	108491	122476
8.28_700.6692m/z	21932.2	22567.4	15611.1	17256.4	21684.7	17527.4	19675.6	21285.9	21910.6	22456.4	21572.5	20307.9	19540.2	21055.1	20032.1	23038.8	20468.4	22471.9	26115.4	21607.5	24856.4	23022.5	23529.2	28829.3	20641.1	24149.5	27319.9	22752.3	27755.7	19846.5	23175.7	17543.8	21622.2	16876.4	17656.9	19630	22102.2	18641	21545.7	20501	23136.1	18006.2	20413.4	20640	24243.4	20493.6	25075.1	25769.7	23506.9
8.28_765.5656n	120971	124727	184067	93297.1	84624.8	131627	102836	184847	164507	97629.2	151131	122545	125809	125882	130037	122850	143491	168540	121885	174010	318285	134710	156385	147997	120817	109120	122815	154526	130185	178210	143945	103881	101498	95248.3	96080	120235	122017	167985	108216	138931	124420	117322	205719	124216	121825	145099	140383	171459	198023
8.28_892.6002m/z	299913	275575	283219	252522	268968	266090	319331	280484	306753	285763	269436	297381	310743	339359	287943	310899	304601	345179	316355	283077	289493	298908	271649	278211	271135	281525	297886	269832	291608	276738	265235	285659	311135	281300	258745	264178	289080	253111	255190	272101	287849	260517	312317	302571	301507	322271	291106	327492	296286
8.29_592.5676m/z	53544.4	60133.9	56688.9	67417.9	61318.1	57052.5	45245.1	51272.6	44724.4	83305.8	55924.8	71841.8	40174.5	51758	57409	60190.4	51935.6	56606.9	72368.7	69082.7	54383.9	45324.8	52119.1	45151.2	64155.5	57391.3	48387	71594.2	64236.9	59393.4	50097	50973.5	49936.4	56576.3	55333.6	51718.2	46868.2	52512.6	64063.7	56085.5	51014.9	70992.1	60286.9	51232	47292.2	45726.2	69582.1	54683.5	60430.1
8.29_804.4355m/z	70329.9	81560.8	67097.2	77461.6	78989.3	61388.1	60969.1	65274.2	82497.5	46573	58106.1	77263.1	71560.8	71633.3	52735.6	65012.2	68330.3	77551.9	62331.5	63565.1	55161.2	61621.8	57043.9	66447.2	92628.4	99293.5	61977.9	66817.1	66390.4	59278.9	73142.8	54993.2	86821.1	51459.6	64473.3	72584	50590.8	77018.4	73387.8	73892	59787.8	54835.1	55758.8	63614.1	56120.9	84833.7	55065.3	54460.8	63030.7
8.32_1083.6996m/z	206733	221381	186959	171990	220709	187776	212002	199083	199372	207524	191126	200446	197967	193308	215802	205991	212432	232076	228139	234225	220190	237187	231835	285472	266150	242741	251503	258347	253099	206252	216770	225824	202803	189554	210476	184930	194738	177696	207583	161811	198556	178105	211234	174207	229424	259350	192308	183761	199725
8.32_233.1523m/z	32747.8	42362.3	28994.9	21854	33230.5	32245.4	37968.4	33268.2	42582.3	34403	33395.8	39430.4	30478.7	37047.4	36994.6	32052	33453.2	35208.9	35936.3	34667.5	33183.2	41407.5	28712.2	38560.5	44714.7	44275.4	45151.7	40252	38576.6	30552.4	36859.1	35045.3	37739.2	33344.3	36025.9	33791.9	38659.1	30943.8	41042.6	30678.3	38586.5	24793.1	37196.2	32145.4	32464.7	37411.9	34670.9	32690.5	31140
8.32_803.6086n	2.03432e+06	1.98068e+06	2.80138e+06	2.18384e+06	2.22397e+06	2.55129e+06	2.04204e+06	2.27297e+06	2.27839e+06	2.32938e+06	2.61361e+06	2.36619e+06	2.68568e+06	2.02989e+06	2.09733e+06	2.60519e+06	2.45503e+06	2.45116e+06	1.93791e+06	2.36585e+06	2.71607e+06	2.33054e+06	2.60128e+06	2.19745e+06	2.57328e+06	2.60665e+06	2.34627e+06	2.2446e+06	2.21067e+06	2.632e+06	2.13495e+06	2.1964e+06	2.01412e+06	2.46803e+06	2.25738e+06	2.10227e+06	2.23163e+06	2.23176e+06	2.60258e+06	2.65972e+06	2.2204e+06	2.3164e+06	2.47547e+06	2.56798e+06	1.97297e+06	2.20533e+06	2.1534e+06	1.80872e+06	1.9008e+06
8.33_631.6243n	150317	158939	151378	136671	169069	154327	164259	162855	167947	156413	140187	174944	173297	153858	152254	173910	166564	174280	168747	160580	157317	165745	146650	167808	149954	163832	174836	168800	160532	170795	152305	146797	177609	171534	162328	154377	162855	152022	167953	154471	157780	163990	162376	167942	163822	160560	160704	170672	154343
8.34_805.6737m/z	899606	760302	1.0894e+06	857307	669347	862086	777830	772863	865865	735215	867939	770763	1.04557e+06	781696	808276	981234	1.10188e+06	1.04891e+06	843414	807609	1.13875e+06	963290	1.21825e+06	1.00522e+06	834724	949321	969118	1.00312e+06	971695	1.24825e+06	885285	973770	729774	816032	798064	822806	851434	761342	776523	1.10996e+06	943206	872110	981953	1.13113e+06	775261	1.0277e+06	819842	1.0043e+06	848596
8.38_1134.5714m/z	53646.6	37540.2	50961.6	30954.6	45106.6	34318.3	28743.2	38230.9	34910.6	28506.6	44385.5	40049.1	27244.6	36003.9	48267.9	44901.6	53053.9	42506.5	61315.4	58532	53901.4	33591.8	59914.3	38942.2	47170.9	49810	40974.1	44523.8	56671.5	35031.3	47028.6	26435.3	39619.1	31977.7	51632.6	42652.6	44586.2	20848.6	41717.2	33762.4	25073.7	36284.8	46142.5	53773.4	43591.2	27943	38502	28550.8	49081.4
8.38_889.6418m/z	129452	114671	135060	110362	108387	149851	130352	129637	117216	107381	124055	117926	133182	126434	111232	146890	142695	133565	118491	118704	144440	137601	114130	122941	136995	133668	132090	124316	125584	151791	129194	142505	117424	149245	133818	119782	99710	122571	126452	140185	106559	110340	136077	144675	121233	128534	113920	98523	108856
8.39_799.7578m/z	236404	179483	320815	281844	108090	243282	260241	147625	77860.1	168042	258547	163598	219652	186853	188384	242625	257404	151275	153756	175585	338546	172748	286211	172661	219457	225157	210070	289424	126682	286098	179504	257456	179446	235981	281450	231796	142683	186146	242150	237447	174507	222476	238309	302411	205866	191479	192885	167108	182694
8.41_1018.6852m/z	259707	233839	276079	268341	248193	276279	263455	314488	275556	231712	247183	239069	277020	251412	265890	315191	291029	273234	227186	229153	283121	270408	301583	283222	235485	254368	247337	250798	239150	272022	251260	271521	243479	244425	241377	271493	250171	238855	236021	238607	272920	254080	250063	293952	250088	220316	236894	251714	237306
8.41_1130.7470m/z	129980	167609	129276	98043.7	165950	149705	171441	176063	145525	163021	141709	142555	168961	153092	172509	168813	169102	215612	154725	174910	179176	154129	134164	201011	197200	192672	202968	176835	188559	174595	109333	146083	152612	129572	151763	142292	154681	124900	157150	182692	132230	165544	174039	145814	216141	188603	135902	187447	158874
8.41_604.6007m/z	29841.6	16933.8	19931.6	19304.2	28245.9	37745.2	25213.5	31381.9	32457.3	27810.5	34379.9	28746.7	25214.7	29580.6	31949.5	37184.1	34149.6	36053.9	35695.5	30334.1	48700.3	36519.4	35131.9	32538.4	26120.2	29549.9	35162.5	39753.3	40925	50751.5	22348.3	28170.1	21654.4	26206.9	23004.1	24576.4	25288.3	26281.4	27422	28673.5	31319.5	26683.5	28187.7	38093.3	38292.7	38004.7	23492.7	23478.4	30402.1
8.41_799.9463m/z	84214.7	102077	62780.8	81903.9	116608	83518.2	105562	93314.2	102533	57180.5	86623.6	46498.7	122662	113962	137912	127376	107019	85281.5	71949.5	88492.1	69410.5	99650.5	115504	97242.7	126129	93211.1	51304.4	60158.4	79064.2	65207.7	85701.3	68858.3	75929.5	61117.7	91808.3	76928	86276.2	59446.9	93130.7	121569	68327.8	92314.5	114008	126598	107070	113405	90276.8	77433.7	100351
8.43_201.0687m/z	12507.5	17842.2	13370.6	10140.3	14042.9	14931.1	13378.8	13389.1	15340.4	12860.2	12767.6	14328.6	12067	12515.1	11660.1	17893.5	14146	15591	14767.1	17801.7	12463.8	13127.2	14440.9	12369.3	13990.9	20218.8	15899.1	13827.8	13460.6	7735.76	13426.1	11594.7	14728.9	16288.4	15996.8	11278.9	15065.8	11176.4	16004	10882.6	16011.4	9319.54	13186.3	13220.5	15558.1	15983.5	15355.9	15036.2	15268.2
8.43_621.6005m/z	164541	94699.4	63353.7	147515	86558.8	76336	70327.8	68081.1	72339.6	70416.4	72350.8	79626.6	80045.9	61325.4	71063.9	71787.2	102120	78539.4	71695.8	77976	77050.2	68800.4	86602.7	69221.2	74281.1	93537.6	57087.6	71057.4	86296.7	71002.6	137313	118524	84028.6	71233.8	65023.5	92581.9	72484	68777	68074.8	69491.2	85023.3	76021.3	66038.7	85688.6	64911.6	88361	59315.8	68698.1	63177.9
8.43_820.6183m/z	24028.5	24222.7	26901.3	18554.4	23234.1	16519.3	18899.9	19063.6	21242.5	17898.8	19131.3	22052	22783	18569.2	22733.3	17758.7	26813.1	21194.1	18102.7	21369.8	35769.9	23707.3	29233.5	23106.4	14973.8	16913.7	18044.2	20836.6	11540.7	22099.7	18789.9	20137.5	21423.4	23217.1	16152.2	23193.4	20648.7	22126	18519.4	18736.2	23494.6	19883.6	21568.7	17934.8	19471.2	17845.3	20952.7	22906.2	20085.5
8.44_480.5148m/z	1.50092e+06	1.3751e+06	1.12259e+06	1.13653e+06	1.28795e+06	1.76513e+06	1.54969e+06	1.74024e+06	2.10225e+06	1.77875e+06	2.34984e+06	3.81343e+06	1.71235e+06	4.45638e+06	5.3103e+06	3.95679e+06	3.71036e+06	2.08899e+06	3.86306e+06	4.487e+06	2.19788e+06	3.47372e+06	3.38461e+06	2.86171e+06	3.69968e+06	2.25321e+06	3.8641e+06	3.72551e+06	2.68797e+06	1.90302e+06	1.43098e+06	1.43662e+06	1.44572e+06	1.82672e+06	1.78794e+06	1.58892e+06	1.76833e+06	3.09741e+06	1.98892e+06	2.99889e+06	3.4282e+06	3.26183e+06	2.0067e+06	3.94644e+06	3.84969e+06	3.85549e+06	2.02591e+06	1.6979e+06	1.85499e+06
8.44_502.4949m/z	20813.9	31013.3	17887.9	17474.8	26147.6	24824.3	29571.3	28728.6	28327.3	26195.5	36628.4	46155.9	26991.3	54066.1	57925	55037.6	54759.8	30526	42064.1	53816.9	29993.9	49737	54966.3	45170.4	48747.4	36373.8	46772.9	43983.2	40539.4	28106.2	24221.7	22497.1	26825.7	25826.5	22600.7	27844.4	28083.9	43823.4	29139.8	34750.8	44753.9	36466.8	32917.9	58780	46636	55172.8	36948	25147.1	32541.6
8.44_704.5600m/z	56473.7	69562.2	88052.2	73687.9	56240.4	78277	62483.7	89681.3	71007.6	65323.3	164313	76778.9	87216.5	68043.9	67844.7	86055.1	68214.7	92784.7	57989.4	78082.2	178990	67056.1	118365	93013.8	74030.4	76790	92762.3	105181	74679.8	143329	85796.4	51492.3	63688.6	65473	67334.9	89432.1	79284.6	107530	61226.2	71852.6	89268.6	77768.8	89670.9	71572.2	81305.8	92892.9	74265.1	132702	72931.4
8.45_899.5331m/z	21631.5	19540.4	20431.1	18804.1	20324.2	20906.5	18288.1	20204.2	25449.9	18887.3	23408.1	26372.2	21369.9	18246	22437	23463.7	25773.2	22507.6	17662.4	21562	16007.8	19382.1	21166.6	20591	22768.2	16747.7	18710.9	15331.3	14329.1	17498	19250.4	14933	21111.5	18155.5	21904.2	21577.4	22560.6	25898.3	26463.5	22458.9	21062.6	16871	21750.3	19177.9	21468	26924.8	18265.2	14376.4	22081
8.45_918.7123m/z	24071.5	24229	18954.9	18091.3	22559.1	23608.2	24454.7	23393.6	22794.7	18693.5	22053.8	20868.6	23472.9	24419.3	17536.8	18856.1	21447	19674.4	14252.6	20190.7	18806.1	25146.7	26082.1	22079.4	25195.7	30801.1	21633.5	17596.9	15829.9	15828.7	21987.5	22141.4	21133.8	30520.4	25413.2	21620.6	19172.9	18424.3	21145.5	18424.7	15875.5	18760	14717.2	15342.4	17340.9	18590.2	15522.2	21308.7	22637
8.46_828.5792m/z	20922.9	18819.3	32604	19199.8	15872.7	18394.5	24055.5	31708.2	26031.6	16561.1	20236.7	24390.3	32773.4	25166.4	22752.3	19143	29049.7	26445.5	20339.2	17938.7	28572.2	17528.8	40241.2	22249.8	23242.6	28308.7	11936	23573.1	18578.5	16189	23998	17311.7	9030.33	18500.5	22156.2	25115.2	13331.2	28129.1	16276.8	18132.5	21207.1	20355.1	21246	19135	17406.6	21275.4	18989	22793.6	19632.2
8.47_107.0492m/z	170175	145356	123411	122084	133249	128066	143604	134697	138589	161078	133277	130489	156102	142077	145904	166059	131053	216739	203783	170169	184352	167567	150999	189993	192086	208771	171285	188377	173616	162659	154749	143233	158013	121249	135599	170421	114187	143773	143925	134663	124325	130890	164831	157640	138733	109740	157768	167453	142953
8.47_147.0803m/z	40868.8	34471.9	34822.3	27473.3	25988.6	26828.6	38474.2	31464.3	37239.5	33075.7	32401.6	30288.3	40525.5	37394.5	37742.8	41932.7	35552	44770.8	44989.4	42635.9	39948.5	42259.9	39931.1	43278	45115.7	52299.9	42766.7	39187.3	42394.3	38656	37094.9	29732.1	35417.5	32039.4	34953.9	32217.1	28061.2	34129.3	33933.5	36742.3	29941.3	34976.9	40727.5	39355.5	32372.1	31131.6	35950	41952.2	37838.3
8.47_163.1116m/z	118235	98071.2	86526.7	88603.8	87336.9	84570.8	96845.8	85279.9	95663.6	91214.7	88205.1	89480.4	104972	101343	94442.2	108013	88515	124386	125465	119391	112123	116374	96883.2	115715	117467	141908	117566	118115	127881	115777	112831	87317.3	99243.6	89008.8	98308.1	96932.8	78841.6	93069.7	95377.8	91144	90050.1	91674.5	112008	100740	89305.3	75380.6	100395	115897	107870
8.47_166.0628n	106115	90705.4	79276.1	76400.3	77584.7	85566.2	89495.6	83629.1	93944.9	84249.8	88905.4	86523.3	107526	92284.9	95970.2	103712	92030.6	121418	120325	104416	112943	99775.8	93624.8	106412	118761	129909	118381	109528	113240	107717	98726	84603.3	88442.9	82930.9	94272.8	100324	73944.8	86485.3	93133.3	91140.6	91092	90286.9	114512	101275	89065.8	69992	103693	104374	96108.2
8.47_175.0753m/z	11737.8	8301	7348.54	7112.16	5957.15	6405.88	8240.67	9253.01	8438.02	7262.99	7498.38	10840.3	8012.61	8247.76	9790.32	11109	8243.89	13724.9	9809.32	12109.5	8817.35	11182.9	7501.09	12521.1	13128.6	10734.5	11375.3	9807.49	11910.7	8664	8804.07	8173.41	9609.31	9014.59	8532.91	8093.33	5905.75	8068.74	8900.11	8749.71	8814.73	7586.17	11195.8	9038.2	10252.3	7026.41	7812.26	10399.6	8119.3
8.47_203.1423m/z	16074.8	12408.3	8851.53	11032.7	10095.2	9282.09	13736.2	9441.61	13030.2	12011.4	14639.9	12150.6	12987.5	11625.9	15295.8	12760.7	12232.4	14603.5	15220.2	14887.4	12751.6	15162.9	13731	15566.8	15540.2	18946.9	14440.8	13398.1	13552.6	13204.5	11317.3	10755.9	12487.2	13078.9	13693.3	10796	12320.8	12804	14499.2	11343.7	12232.3	11135.5	12182.7	11237.4	12060.7	10419.1	13004.4	14606.9	13957.8
8.47_261.1858m/z	9649.95	6267.92	5686.43	7845.3	5784.72	5373.62	5988.24	8241.67	9721.28	6232.47	7444.55	10235.4	9123.65	7328.09	5949.48	7366.9	6521.99	6516.43	5731.14	8832.71	7553.42	9325.58	6641.19	10651.5	10206.6	9431.22	8843.74	7066.64	8863.29	7215.47	9142.11	6369.99	6978.88	7163.75	7954.35	9142.38	8566.1	8007.79	7163.88	6897.98	7531.21	6247.54	6846.05	6002.63	6185.06	5152.15	7925.19	6483.62	6272.48
8.47_362.3321m/z	33350.6	31140.2	25076.7	23792.9	37194.5	31009.5	30614.2	38652.5	36962.6	28470.9	29763.9	34870.6	30943.9	35549.3	30440.7	33137.3	34779.2	34382.1	32549.2	34231.3	31435.9	36005.4	30418.2	34583.8	36909.9	35902.7	33054.8	25962.8	33746.5	26071.7	34071.1	24556.2	35511.3	36434.6	33329.7	28564.7	30651.3	28031.6	37551.5	24481.4	38510.9	27168	29492.4	31337.4	36305.8	41774.7	26891.2	34686.5	28028
8.47_892.7433m/z	152556	140796	150327	171588	164898	166680	181384	161777	158294	141011	134766	154392	189392	154245	129222	138311	147166	134235	159309	153918	111741	132895	128142	133658	137247	140394	131855	154804	147345	148827	154998	166022	161909	161343	156951	147027	130183	166586	141586	138398	129977	134441	123101	130992	139999	124610	128820	136602	154885
8.48_221.1169m/z	28942.9	23953.6	20576.2	18817.2	21680.8	20496.9	21779	20277.5	22811	21994.9	22489.1	19697.1	23809.1	20715.5	20962.2	22663.1	21838.7	27042.4	29627.7	23852.8	29377.8	25009.4	19983.2	23517.8	32786.8	28931.2	31230	26285.2	30510.9	23930.4	25125.6	23171.5	18629.4	21498.9	20821.6	21804.6	18177.5	18574.2	26289.8	19312	19597.7	24327.5	23867.1	20601.9	24571.4	18878.1	22032.8	22633.4	18844.9
8.48_508.4484m/z	932089	868605	755457	747146	903224	923261	889234	961296	1.04019e+06	934393	980295	1.26383e+06	963227	1.30741e+06	1.41096e+06	1.25563e+06	1.23983e+06	991671	1.26215e+06	1.31415e+06	950521	1.19566e+06	1.06754e+06	1.0902e+06	1.36067e+06	1.07523e+06	1.18107e+06	1.23441e+06	1.18673e+06	955318	915794	872491	919301	892910	914701	930875	939710	1.08666e+06	1.03252e+06	1.05565e+06	1.19665e+06	1.13566e+06	1.01943e+06	1.19128e+06	1.27213e+06	1.22008e+06	1.00537e+06	974220	943378
8.48_730.5783m/z	908371	1.03167e+06	1.38911e+06	969872	1.02016e+06	1.68111e+06	993672	1.24643e+06	1.19684e+06	974032	1.65894e+06	1.14522e+06	1.33588e+06	979443	954264	1.30844e+06	1.07746e+06	1.4182e+06	851238	1.29744e+06	1.95325e+06	911779	1.69397e+06	1.28838e+06	988783	1.29551e+06	1.17197e+06	1.54515e+06	1.04576e+06	1.56424e+06	1.27642e+06	868115	1.00937e+06	912595	1.16941e+06	1.20348e+06	1.13603e+06	1.41589e+06	841673	1.22436e+06	1.2763e+06	1.07195e+06	1.14744e+06	1.22656e+06	1.08975e+06	1.15998e+06	1.13198e+06	1.59193e+06	1.0775e+06
8.48_741.5057m/z	26778.2	22051	18668.8	17808.9	25609	21008.6	22065	26844.2	21880.3	21617.9	26422	28050.4	27318.4	24335.1	25837.8	19279.7	17940.9	31224	26895.9	30210.3	25218.4	25203.1	20176.1	26438.7	29666.5	27845.5	31253.3	25817.6	28981.2	14697	20795	24913	27746.3	21701	23035.7	16056.8	26311.1	22349.7	32708	19902.3	20823.2	24715.5	18827.8	22809.5	24073	26416.1	22872.2	19981.4	24889.8
8.48_802.5729m/z	66709.6	47477.4	87957	49285.9	53317.2	66443.8	57194.6	86656.9	79799.7	51405.9	72911.7	57171.3	100857	71837.3	60869.4	68251.6	57083.6	68647.6	54197.1	59767.2	90565	59198.2	95553	85233	74235.7	74554.2	49522.3	72956.8	46602.8	66462.2	77982.3	46989.5	72403.9	50002.6	60458.2	69353.5	51195.5	93630.7	51707.6	84919	43248	58314.3	73827.6	56348.7	68200.8	59130.8	63238.4	75990.8	58508.1
8.49_971.7308n	1.03515e+06	695420	1.0206e+06	1.13005e+06	1.45547e+06	1.12176e+06	895690	1.17549e+06	1.15752e+06	1.1156e+06	944385	803586	1.00682e+06	1.03627e+06	1.21941e+06	960576	1.12948e+06	1.26132e+06	1.15453e+06	990014	1.24972e+06	948607	1.31961e+06	1.08818e+06	1.02688e+06	1.09966e+06	1.14429e+06	929280	1.32302e+06	1.50133e+06	1.03716e+06	974287	715935	911199	1.20728e+06	1.06343e+06	1.18256e+06	756742	995010	1.15916e+06	1.17523e+06	886630	941647	1.28355e+06	904758	968126	942280	996782	1.00409e+06
8.50_612.5982n	111253	78729.1	67245.5	62986.1	105446	64779.9	92966	79495.4	101608	83532.3	92147	79706.6	69228.3	91821.8	108537	85433.8	70180.5	119421	90933.9	103768	102361	93239.9	100602	68706.6	79751.9	97579.7	61508.5	77201.7	80656.3	93859.4	72562.8	102851	73969.2	62372.9	95003.7	76521.4	113927	86159	88610.2	81180.5	86753.5	79809.3	103227	100588	90243.2	53549.9	67513.7	75598.1	69552.5
8.50_707.5823m/z	45952.1	41290.7	33035.1	34045.4	36921.5	35236.5	40439.6	42449.4	39827.2	39409.3	40002.5	44437.6	42815.5	35100.5	29934.3	45508.1	40813.6	38141.1	42434.5	43529.4	35141.2	41079.7	35956.6	40297.2	37508.3	48951.7	40470.8	42468.5	42540.8	35917.7	42996	33604.6	46215.9	34180.9	44564.1	40599	42043	44662.5	40409.4	38774.8	42667.6	37846.5	38307	35191	34106	38962.9	34076.7	40732.8	39432.1
8.50_965.6272m/z	112140	119515	116216	99747.8	108582	105643	115613	99211.9	126441	96090.4	106336	100198	108622	115265	120604	98790.5	103647	114746	107352	105448	89942.5	132711	114567	121011	95809.4	103339	103762	114177	114109	112809	112801	95518.9	97589.4	111480	114199	117983	109800	105581	105060	115830	96374.7	104780	104885	108294	104182	118445	120507	111309	112785
8.51_975.6854m/z	53145	46372.5	45973.5	40754.5	48032.5	47042.1	49179.6	31331.7	53238.8	45868.1	47819.3	35964.5	45229.4	49048.9	40646.5	43481.4	39524.6	48667.9	42862.7	56351.2	55653.1	60208.1	44604.7	46012.5	46126.8	48059.9	44924.7	50086.7	44977.5	31691.3	47328.1	59690.9	25367.9	41833.2	46067.4	46204.3	48412.7	49825.8	37191.7	37788	45790.1	29692.8	49303.4	39477	44892.6	34589.4	40202.6	31523.7	44464.3
8.51_997.6705m/z	191606	186298	175811	145919	196915	163901	195330	183622	190428	170590	190737	183079	203791	199765	189065	191785	171548	205728	195821	180979	172936	167866	174170	182844	188484	174070	200086	167584	196182	169118	153767	180182	186681	177915	169895	185333	201726	192972	203889	189608	198816	183928	182114	200548	172602	193237	167813	176629	184265
8.54_892.6804m/z	220394	200316	231828	249457	227228	195948	254967	211274	229886	203363	216780	212913	277624	262434	218906	238699	162408	213012	210994	199474	207359	247670	197787	155158	199693	188883	165504	192644	229912	242779	199255	245325	166485	191102	186364	190716	153397	261513	174885	192068	162963	193182	191159	177844	241573	174170	156989	153623	216266
8.56_756.5929m/z	396300	247484	507858	239466	434399	490018	361737	402768	502260	416401	606819	488705	689907	322371	321749	458058	340750	445830	321917	478795	541333	379209	505823	395814	476139	518898	453133	451744	303660	427369	449525	313318	500404	429031	334589	334976	321873	439413	303883	508564	348862	339028	383042	377910	369199	472539	385343	559569	351843
8.57_655.5840m/z	277420	253523	235262	251077	303512	227232	257407	245608	248166	268032	255896	290221	260756	240228	247125	240896	251600	258261	279504	304878	266377	265444	255715	248587	271461	258063	274470	244823	269331	228641	251300	211797	261668	244526	308618	219569	251695	314129	284124	239496	256269	287661	260486	239988	248236	253327	252885	288263	248306
8.59_1122.7863m/z	145308	99602.4	91294.1	98860.3	108049	111954	116801	122439	152513	130872	103020	109104	131010	103543	95345.1	87401.3	83503.1	106505	97205.5	94273.1	158935	128546	134738	145373	162052	217040	117341	171757	197500	213475	112733	89748.1	90556.8	100724	113398	108011	81304.1	101248	139896	105252	115502	90955.2	80693.8	95179.5	107169	102455	75854.4	105187	90577.4
8.60_797.5118n	503507	515131	946815	816431	759589	829815	640374	701755	719496	803185	1.00703e+06	688088	747187	674021	614030	632077	484775	758757	533297	581646	848226	720926	994684	818418	617952	802730	644330	596764	758034	883706	625364	670774	487102	711948	857803	671281	642639	672357	613375	912881	633385	600148	637218	715604	567786	733620	578196	517215	598500
8.60_920.6361m/z	373867	313698	318354	280416	335891	309476	357238	334587	346488	304193	313677	346853	361263	340688	334871	339313	347448	369862	342924	360456	342174	340184	330910	348589	356465	388797	347819	329990	359415	314892	332137	326800	358065	323125	306335	275577	304068	330895	363373	280774	310045	305034	336917	329957	345966	343220	324817	373623	320358
8.64_634.6120m/z	38563.7	31631.4	24160.4	60896.1	30504	28808	36852.2	31627.5	32678.5	45511.2	37413.3	38065.6	36604.4	32615.1	42484.6	38483.5	49897.5	31810.1	27410.1	29576.2	41989.1	21967.3	42775.7	29235.5	36412.4	45553.4	40926.5	48380.1	44138.7	39938.3	27621	32991.3	45049.4	39454.1	31408	45146.5	31905.5	36908.1	40421.7	41330.2	36294.3	39731.6	40202.3	73476.2	33903.2	37657.7	31806.7	37797.8	27488
[truncated: 114 more rows]
[truncated: 41 more columns]
