# Supplementary material for: Lipidomic profiling reveals distinct differences in plasma lipid composition in overweight or obese adolescent students
Source: Research Square preprint supplement (doi:10.21203/rs.3.rs-33013/v3), 2021-03-09
Supplement: Supplementary file 5 [file c56b3f09cfe2555a5f107ee3.xls]

## Sheet: Additional file 7
mz	control_6	control_9	control_12	control_13	control_15	control_19	control_22	control_25	control_29	control_32	control_35	control_39	control_42	control_45	control_48	control_52	control_55	control_58	control_62	control_68	control_72	control_75	control_78	control_81	control_85	control_88	control_91	control_95	control_98	control_101	overweight_7	overweight_10	overweight_17	overweight_20	overweight_23	obesity_26	overweight_30	overweight_33	overweight_36	overweight_40	overweight_43	overweight_46	overweight_50	overweight_53	overweight_56	obesity_59	overweight_63	overweight_65	obesity_66
0.53_617.7358m/z	8286.86	4475.09	28119.4	78207.3	57471.2	71792.8	58233.4	45409.6	32024.1	11028.1	39776.9	10691.2	3176.91	10322.9	15356.1	11464.2	85751.1	37576.9	72831.7	14054.3	13727.8	8778.26	13431.2	15313.3	25540	102395	107267	16519.5	14316.4	13404.2	23592.1	11950.2	54025	53719.8	20666.9	87901.9	27416.9	47490.6	20055	7795.14	2991.44	11591	1666.17	4911.01	4169.71	25536.2	20222.3	103615	25466.9
0.55_134.8955m/z	2728.63	1945.59	1374.81	368.909	1824.33	2014.74	1472.06	1535.02	1785.01	1965.21	2108.14	2414.22	2857.82	2637.57	1845.42	1624.2	2013.55	1797.38	1449.03	1731.46	981.02	1487.17	1487.71	1713.36	1801.99	1898.4	1358.58	1507.72	988.908	903.713	2675.39	1689.23	2028.41	1624.09	1522.54	1802.27	2035.44	2212.22	1964.52	1965.57	2319.83	2082.27	1660.83	1664.02	1911.26	1526.58	1358.88	1390.04	1201.73
0.55_150.0537n	7748.5	3423.09	5735.92	7097.15	8517.42	3610.48	7277.38	5673.42	5546.23	2501.08	4417.06	3887.35	12703.4	2739.71	3806.84	6275.62	5230.18	5621.01	4378.61	9210.9	6098.78	7954.52	8104.36	3167.77	5405.41	5097.93	3778.23	3552.27	2587.29	3635.37	1560.08	1134.5	8264.63	5243.47	9004.37	6587.39	4402.37	5424.21	4492.83	12749.9	5779.4	5886.78	3929.06	4861.51	6656.24	3696.5	4695.05	6182.73	2388.52
0.55_220.0048n	681.26	5503.94	162.445	156.667	2413.46	23082	3844.78	1739.09	526.699	38905.1	889.146	2373.09	17381.8	1158.26	717.605	21616.9	586.966	558.254	562.355	944.335	1109.85	281.587	416.242	2626.27	663.314	100714	418.879	18590.1	743.296	32523.2	10251.2	401.012	11756.9	875.113	56734.1	6049.93	519.328	2334.58	232.32	14727.9	2249.69	413.147	4782.18	204.072	12263.7	42317	7746.33	11982.7	4035.73
0.56_145.0626m/z	45632.8	34116.8	30020.1	26271.2	40867.4	34021.5	25172.2	34019.9	39082.1	35264.5	28859	42497.7	41316.9	41116.2	39374.5	32141.8	29701	33478.6	38282.3	40054	30484.9	40112.7	36268.8	36262.4	31937.4	31681.8	33131.9	31034.1	37045	27449.4	30801.9	32622.7	43911.1	28520.7	27779.4	29810.9	34571.2	28972.6	36667.6	36552.6	34748.8	30133.9	30252.9	27625.6	38391.5	37466.8	33405.6	33900.7	34889.7
0.56_180.0342m/z	3324.67	2398.61	3494.49	2866.02	3176.92	3439.41	1572.43	2965.9	2948.19	3582.58	4204.74	4289.86	6735.2	6272.87	3057.6	3574.84	5050.6	3987.48	2692.69	4262.89	3258.23	5938.56	3546.05	5791.47	2912.05	3699.31	4310.58	3642.07	667.145	3220.35	2321.02	2438.39	2925.75	2473.13	4417.93	5281.4	3203.03	2877.92	1899.89	9507.74	4082.02	2043.99	2926.56	3278.17	4529.66	1024.31	4160.19	4908.11	4280.65
0.56_245.0492m/z	11573.7	31385	1237.66	11078.3	13048.2	18562	19171.7	15791.1	11540.4	29834.1	15801.4	6479.82	58341.7	3653.98	6732.39	6056.18	14875.9	2349.55	29384.2	7330.71	24686.4	3623.2	6635.87	20712.9	13874.2	12492.5	18663.3	9445.6	4099.41	8912.21	5030.23	720.417	7366.13	12635.7	6912.1	4753.42	26482.3	17663.5	2332.56	61530	5933.77	2352.66	7048.85	2017.75	16584.3	12540.2	21129.5	12128.7	8735.69
0.56_381.0275m/z	138.339	351.415	103.058	508.27	445.223	1298.36	425.152	1814.46	494.734	1358.7	276.035	498.607	8010.43	441.625	191.576	708.901	780.46	215.687	304.148	1838.42	18782.2	216.915	259.162	99.3292	318.232	839.464	244.635	163.35	95.0181	172.603	206.138	64.1774	554.983	365.447	99.325	1922.69	2016.03	227.233	274.878	8492.11	2939.29	6676.16	478.468	257.218	2824.91	6866.66	176.62	5.29598	1595.69
0.57_104.9545m/z	9724.84	9498.72	8682.84	8226.93	6847.64	8239.89	8984.82	10588.9	8156.07	7822.34	7153.27	7773.2	5858.78	6836.97	8328.94	6862.13	8482.47	6808.85	9447.16	7891.28	7237.71	8312.08	6191.44	6912.16	8263.87	7414.17	7419.16	6965.04	7302.82	6323.63	9853.82	8097.64	11579.9	6136.7	7817.79	7174.59	10040.2	8274.17	8881.69	5352.87	8779.81	7238.75	6613.8	7487.17	7675.06	8188.74	8191.16	8897.6	7676.48
0.57_584.8130m/z	21081.5	18679.8	17145.6	23024.6	21790.7	16156.6	18747.3	17258.4	23457	14753.5	13386.3	22789.5	19243.2	15942.2	18123.9	20040.6	18504.8	17261.4	21548.4	20911.6	23057.4	18741.4	23890.1	26691.6	19103.1	16483.7	20215.6	22220.4	20945.3	20768	18435.8	18051.8	26282.7	16413.7	14724.9	13689.8	17355.9	13456.8	15547.2	19933.5	21328.6	16627.9	14199.8	15207.5	17178.2	22942.3	19628.9	22233.9	23036.4
0.57_758.7448m/z	28046.4	24510.3	24972.4	39426.9	32003	18694.2	28758.2	26615	25279.1	15533.6	17607.7	27744.5	11599.9	21421.7	24661.8	26314.5	20448	23127.3	24676.9	19749.8	19406.5	30875.7	19870.1	26458.8	19220.9	13424.3	20051.4	12774.2	27460.8	21688.8	26969.7	23457.3	32833.2	23155.7	26962.2	23000.8	24827.5	23712.7	24431.7	8299.95	19462.5	16172	18832.6	15048.5	21698	20509.3	21906.2	23854.3	21571.9
0.57_793.7585m/z	3094.89	363.28	1055.22	2456.18	5787.57	76731.5	806584	1.75617e+06	705483	187589	22110.8	7595.07	941.689	2115.75	3820.16	4034.26	3622.4	6262.14	6845.8	5205.69	4173.84	5746.23	4012.68	4176.74	5130.44	2995.94	11115.8	4369.99	24502.8	20287.7	931.328	564.352	41583.3	204602	1.1097e+06	988118	422990	103522	22769.9	2140.98	2502.42	1775.77	3226.75	4045.34	3909.89	4826.4	5716.96	6457.96	8961.48
0.58_1040.7290m/z	4251.53	7888.98	3051.77	21545.4	9546.75	5214.4	5840.73	4789	1704.3	1948.43	2264.17	6008.05	7037.09	4735.43	15663.7	25602.4	17743.1	19294.7	33363.4	3066.27	2152.64	3076.94	3815.11	4472.81	3793.2	3924.86	7182.42	6779.02	5505.07	6599.97	11663.7	7833.08	10270.4	6765.42	2138.3	2093.29	1858.23	284.218	1761.53	1427.96	4728.96	7483.31	13811.7	22699.7	19978.9	35960.9	7869.83	8951.04	17454.5
0.58_213.0505m/z	53004.8	43486.4	38510.2	28764.6	42939	35157.4	35466.7	38591.2	52461.4	55064.9	44986.8	39018.3	58367.4	45760.3	44646.2	40893.1	60764.7	46331.7	44214.2	49640.5	39790.5	47012.4	47599.4	49565.2	55894.5	54997.4	48831	54203.2	33773.1	34989	39551.5	43177.8	45567.5	35214.5	43198	54036	47254.5	38544.8	42672.3	55705	42863	40010.2	38167.4	45366.9	52943.5	47504.5	40226.8	47746.8	44960.5
0.58_281.0374m/z	3426.13	3974.52	4196.95	1546.84	2520.53	4059.83	3167.94	4115.66	4377.84	2840.52	1916.2	5351.97	9452.93	5608.97	3507.62	4113.23	3303.02	3827.87	3749.76	4735.54	2927.98	3457.08	3613.37	3103.78	3785.82	2874.4	3246.7	3781.42	1717.47	1608.75	2353.92	3341.42	4660.58	5079.93	3708.76	3335.75	3443.16	3515.15	2232.96	11194.5	5675.91	3347.51	3922.21	3156.67	4243.1	4627.85	3352.62	2422.4	3111.98
0.58_349.0242m/z	8852.73	8019.3	3837.54	4572.4	6199.56	6274.37	3144.32	7877	7183.73	5554.3	6700.52	8720.05	17593.7	6147.81	8470.49	4339.96	4938.09	5028.64	4366.73	6441.02	7004.8	6338.81	6058.94	4943.28	4544.74	6660.48	4960.58	7946.68	6085.9	2604.14	1662.82	3375.29	9239.84	3537.94	3400.82	5834.57	12892.2	6730.11	5055.2	15760.3	6857.91	4391.16	4464.53	2167.16	5042.22	7783.64	5191.63	2603.5	7124
0.58_474.9697m/z	4691.56	2121.99	2083.21	2825.15	4505.83	4105.14	2736.5	3764.47	3729.39	2365.27	3728.84	6591.58	7419.21	4850.39	5889.43	7197.89	5406.36	8757.33	5370.13	6298.59	4601.45	5216.34	5113.57	4790.37	3928.23	4316.13	3815.43	3760.82	3866.33	3012.36	1708.4	4469.65	4156.9	3024.77	2115.99	1643.51	4611.63	2277.54	3420.62	7457.3	6025.04	3941.73	4517.59	5946.37	5791.11	6011.44	5989.78	3351.78	5338.95
0.58_484.9985m/z	5300.46	4867.28	3193.81	4007.31	5098.22	4511.88	3542.89	3586.26	8492.46	2713.68	4305.74	4318.44	8652.27	4071.57	5704.41	4472.73	3061.68	4296.9	3516.71	4864.94	2200.78	3551.17	5539.6	3543.95	4263.9	2887.59	5552.5	4314.13	4053.01	2217.26	3019.01	5266.26	3100.76	2016.57	5278.71	2204.8	3303.82	3024.54	4349.18	7307.82	3664.25	4741.92	3355.94	2856.19	3432.34	6713.2	2394.67	3545.08	3735.54
0.58_610.9446m/z	4277.18	6658.37	4418.06	5368.27	5401.38	6061.85	4392.49	4835.64	4176.38	3575.67	3328.45	5827.16	7190.51	5040.59	3942.88	4932.19	4524.76	5772.64	1685.95	8904.61	4034.62	8484.24	4531.71	5367.33	3678.9	5320.66	5292.99	3916.35	4225.47	3639.4	6059.83	5549.39	6796.1	5223.12	3911.02	3134.35	2992.84	3382.7	2804.96	8778.49	5878.95	3312.51	5212.86	4031.46	5826.78	7532.24	3773.25	6032.22	4171.69
0.58_678.8046m/z	10192.2	9034.41	11549.2	14552.4	16156.7	10193.9	8552.83	10019.6	8861.07	9177.05	10943.1	11917.9	13296.2	10752.5	7406.9	9188.99	10018.2	9469.05	11614.5	8294.93	8942.81	9186	8748.95	8091.05	7130.6	6777.18	5336.46	6971.79	7639.91	7783.61	7821.38	8738.51	15112.9	8862.33	11864.1	8964.64	12610.5	10784.1	9665.79	12203	9836.35	10044.5	9104.58	7654.84	9488.63	13387.3	9740.5	10959.7	8738.24
0.58_760.8610m/z	18709.8	19884.8	17013.4	17135.1	20264.4	12327.7	9129.35	13104.3	10756.5	11268	11191.6	15333.1	21896.5	13217.6	19689.1	20071.8	20984.7	18798.5	12393.3	9270.81	10267.5	10696.1	18541.1	24761.7	21156.8	21046.6	19919.2	13316.7	8925.74	7546.6	16690.7	14061.6	19904.1	14711.7	11503.2	8516.62	15171.9	14984.8	13087.6	13942.1	13764	20341	13167.4	20837	15310	18599.8	11305.5	11372.3	13074.1
0.58_795.8167m/z	12778.6	24922.9	18534.3	25601.1	23753.6	13451.1	17271.1	19222.9	19753.9	14147.6	18485.5	18831.6	22313.1	18002.1	14223.7	18134.8	10990.3	18932.9	22854.2	18207.8	18601.2	14871.3	18545.3	24460.5	14543.4	19473.2	18593.3	21337.5	11293.5	15029.8	16490.4	20335.5	22320.5	16780.2	14762.1	9373.89	22849.8	13500.2	19860.1	18237.8	13312	12776.3	12392	18195	15605.4	19053.8	14582.3	17864.3	17324.7
0.58_928.8306m/z	10222.8	12830.5	8076.39	11388.6	9054.12	7357.33	2261.87	7697.34	8586.13	7504.27	7998.52	9966.88	9360.8	8226.55	7475.66	7992.67	11213	12195	10922.4	14503.6	9150.51	10189.6	9522.17	12360.5	4763.11	7507.42	4798.54	5993.36	3366.96	2938.85	4257.57	8177.62	8666.92	3752.73	6227.61	4050.07	9236.57	4237.34	5799.12	4075.41	6907.1	12467.8	11070.8	8336.16	12437.3	13548.4	9763.75	8223.48	7013.03
0.58_978.7675m/z	11640.7	26212.9	24125.8	38265	32392.9	20550.3	17940.3	22126.6	21017	11961.5	11100.6	15118.2	12743.7	16630.5	13674.5	17335.8	14867.4	25207.9	27719.9	24431.5	21691.3	34379.3	23303.3	25808.1	14085.4	16793.5	20924.8	22770.6	20975.3	16583	26946.9	26061.9	32977.3	17744.2	19790.4	18582.3	15934.1	12228.4	12847.5	7641.67	10706.1	14772.4	17294.3	10928.6	18473.7	22313.1	22307.3	25512.6	26618.4
0.60_894.7315m/z	1288.13	7716.89	14301.5	8011.26	834.331	608.648	192.67	83.137	94.5286	6.74919	80.1869	60.3818	818.856	3215.8	16129.9	20087.6	9479.63	598.155	236.375	293.832	690.05	90.885	0.788341	79.6395	83.1206	358.254	11.6783	219.465	461.889	107.479	1083.29	2947.51	163.362	475.545	142.626	54.0624	0.234771	0.828077	55.2279	198.163	1988.16	7742.19	14385.4	17651.7	8998.15	3137.19	413.486	225.099	930.017
0.71_507.2227m/z	353.195	218.853	129.224	384.015	123.455	181.765	143.355	39.97	45.1414	31497.4	139.431	106.244	63.3026	131.486	196.247	12.2473	209.963	321.298	74.2494	56.2143	11.2583	83.8602	222.604	7.68819	147.424	105.108	206.272	217.202	126.637	671.728	308.584	195.881	230.552	178.343	91.8929	173.078	181.765	44.6118	129.839	77.1061	33.6283	1.20491	59.0614	427.761	20.095	152.378	475.379	9737.83	162.68
0.73_265.1801m/z	219.115	60.0642	245.899	508.896	328.318	485.77	881.413	1032.24	539.586	1590.86	1248.25	700.126	139.753	352.579	915.949	1172.76	1171.95	1423.5	967.883	530.187	1131.96	1668.59	688.66	868.712	1347.82	910.626	340.658	317.076	1328.04	742.128	591.313	318.697	399.332	280.627	596.568	761.386	300.095	291.747	375.354	388.575	875.861	1131.69	858.541	993.829	2389.14	1341.66	603.943	1012.55	485.717
0.73_393.2284m/z	78135.4	51831.1	72131	76797.8	72430.3	59993.9	51418.8	47562.7	55805.4	27251.7	37464.8	42519.8	36693.8	47725.5	51145.8	58930	20165.3	44590.6	58826.2	39367.8	51455	66945.8	47696.9	38682.7	44622.3	45539.6	45823.9	35401.8	42131.1	55410.7	77501.9	64243.1	81410.1	47283	51792.4	46516.8	70510	34684.6	51505.8	23650.9	32012.8	35764	41927.3	51098.4	46601.8	52842.7	58047.5	61433.8	51289.7
0.84_313.0787m/z	6.82962e+06	7.36864e+06	7.84915e+06	7.17421e+06	6.94715e+06	8.16858e+06	54.2346	7.03564e+06	2450.02	8.22545e+06	8.70555e+06	7.50871e+06	7.68583e+06	7.79224e+06	7.76095e+06	21042.1	7.25685e+06	7.11838e+06	44467.2	7.12929e+06	6.94726e+06	9906.39	6.58684e+06	7980.3	6.37815e+06	6.24754e+06	3877.54	5.78658e+06	5.568e+06	5.80061e+06	6.95865e+06	7.65565e+06	6.32416e+06	8.01365e+06	8.0506e+06	8.06532e+06	6.84612e+06	9.24794e+06	7.78713e+06	6295.18	7.48076e+06	8.33765e+06	7.68744e+06	8.18547e+06	10021	6.40279e+06	7273.69	6.33609e+06	6.93571e+06
0.95_452.2782m/z	363.304	7295.26	2929.56	13106.6	941.198	2877.14	3575.38	6127.36	8624.28	6832.71	9943.62	6592.82	1561.66	1743.17	751.593	4796.37	2966.84	3014.1	3180.94	5454.23	2938.65	2177.09	856.889	2461.72	8556.94	5213.79	1565.17	4894.11	3184.53	1314.08	2745.89	2976.27	4057.85	6172.76	4458.51	3146.5	1538.8	15874.1	2705.4	1882.78	1115.57	5540.45	2376.12	1962.5	5001.44	1740.62	1232.72	4314.58	2840.15
0.95_512.2991m/z	12271.5	81737.9	32577.3	101650	22219.3	26503	37891.4	71222.1	42158.3	24045.2	84790	68303.6	26046.9	44910.1	15632.2	36362.8	10008.8	11849.9	25446.5	74979.3	20291.8	26986.8	21459.8	21146.1	73401	74365.8	28501.1	65253.7	27047.4	22552.2	25288.7	25067.6	49618.5	55558.3	42958.7	17480.9	24601.3	115797	44229.6	35200.4	7888.92	52589.2	31219.1	33286.6	33026.2	8122.79	25941.7	43765.2	14405.5
0.98_612.3299m/z	67834.9	100749	93714.6	72168.6	63674	81714.1	36790.2	65425.6	93537.1	74443.1	89200.6	33402.9	69088.5	31078.9	84543.6	41901.6	45578.9	66216.5	100103	85804.7	60481.3	105069	54862.7	32764.1	46781.5	36321.6	29976.3	87126.5	81693.1	104860	68570	68506.1	43344.8	42273.7	52257.9	73461.6	35336.8	120017	74069.4	66912.8	76956.8	55093	87120.4	49916.4	136683	59524.2	46798.8	72901.1	37037.2
1.00_538.3146m/z	87820.6	128259	57076.2	254638	89092.5	87938.3	88078.5	88843.3	85446.5	112856	176441	86434.5	88368.9	74404.8	94523.3	59657.9	37522.3	55163	97702.6	122785	63080	130124	60184	51060.2	72654.7	52954.3	60323	131928	91181.3	64894.2	60244.9	113157	47601.9	136912	180632	80646.9	69651.7	232822	88564.7	91225.9	74728.3	110595	108363	93375.4	85031.7	61806.9	85787.3	111449	62602.8
1.01_524.2778m/z	63366.3	73447.9	77408.9	115044	82977.7	53186.1	36451.8	57933.9	43836.2	83005.1	52379.8	44250.3	30150.9	27066.5	45668.1	45646.3	38997.2	63626.1	82534	68619.8	38108.6	55526.6	37412.6	19945.5	37546.2	39183.5	37968.5	44344.2	57648.1	88225.8	84582.7	80135.2	39760.4	39194.5	62501.1	40558.2	20386.6	89954.3	79195.6	47550.8	59151.4	57923.5	82601.8	47601.6	100604	37641.2	37460.5	44401.5	25311.2
1.02_528.3091m/z	41367	57094.8	42920.6	64707.5	34729.6	40060.5	30815.9	41502.8	69892.6	55579.3	56792.8	27382.3	43862.5	36277.7	67386.1	38977	24962.6	63051.3	55105.9	49219.4	52840.1	64657.8	40558.9	24080.1	36272.5	20968.2	23752.9	91436	44457	63422.5	35432.8	41265.7	26308.7	25970.7	41831.8	40807.4	26384.5	89247.9	36272.1	38038.4	43428.7	55136.5	74821.5	26579.4	122126	42287.8	45049.5	60805.1	29184.8
1.02_588.3299m/z	392816	528535	421116	556185	348932	393877	284201	400335	581809	492131	492125	277491	369613	360582	532740	345929	227296	510462	431278	413800	399840	511928	300833	200971	314721	239647	250070	882985	416865	580693	336274	402093	256482	269708	382705	409385	249873	714556	352861	356725	397959	423553	581883	266376	971288	392525	375301	492508	275989
1.06_505.2566m/z	901.875	3545.64	1837.4	1493.14	1928.19	5148.85	1028.5	3341.87	5492.89	2833.23	3171.13	838.335	3035.68	1301.85	2944.85	2027.19	449.163	2809.35	1356.96	2683.38	2386.23	3216.33	1464.25	1494.59	1009.6	1504.42	1215.28	4767.27	2443.41	3404.89	586.102	1379.39	1575.32	2647.01	630.598	1205.53	2284.94	2735.59	1735.48	1818.09	4933.26	1176.98	1916.58	1046.45	3555.72	3190.78	926.836	1614.72	2622.5
1.06_519.3322n	303360	552880	426481	335163	435200	1.00161e+06	337757	580160	903687	744394	701245	434224	489992	270091	470806	470675	286632	698388	399163	629697	551966	710678	342545	462750	365110	421839	477932	1.09538e+06	485298	610681	348208	399192	450389	483504	345567	359398	525784	662545	388109	573570	760205	359382	515951	380997	1.0433e+06	584441	323443	420147	447456
1.06_564.3304m/z	2.07401e+06	3.53054e+06	2.73061e+06	2.1431e+06	2.83202e+06	6.0616e+06	2.21709e+06	3.70104e+06	5.58778e+06	4.6165e+06	4.39417e+06	2.97446e+06	3.25258e+06	1.83881e+06	3.13378e+06	3.02824e+06	1.93297e+06	4.37733e+06	2.63378e+06	3.94685e+06	3.4977e+06	4.42066e+06	2.20642e+06	2.92539e+06	2.35059e+06	2.74924e+06	3.12682e+06	6.61216e+06	3.06526e+06	3.74507e+06	2.36328e+06	2.58489e+06	2.93335e+06	3.10807e+06	2.29524e+06	2.38196e+06	3.32725e+06	4.16374e+06	2.62376e+06	3.62401e+06	4.8767e+06	2.38111e+06	3.31024e+06	2.49311e+06	6.42282e+06	3.72435e+06	2.19743e+06	2.73836e+06	2.96991e+06
1.06_694.2873m/z	5195.8	8901.25	6198.14	1794.66	5670.15	15409	2475.48	5667.63	17379.1	11688.5	11778.6	2328.75	4455.38	3049.03	7517.43	10554.5	3209.06	14033.3	5188.83	15035.2	10603.1	8920.09	3681.31	6431.25	3340.5	6454.96	7405.26	31203.4	5952.6	14498.2	4250.72	3719.59	3737.13	6260.01	3063.55	4224.24	8237.32	7854.66	2403.74	7461.96	13507.9	3850.43	7360.2	3042.81	28178.6	10589.3	5339.14	4741.93	4603.67
1.07_1083.6619m/z	4442.88	40019.4	30206.1	10770.2	24476.1	214278	10656.1	44644.3	154029	96979.6	92044.5	18204.4	13295.5	2162.9	12748.1	29417.7	4218.21	90948.7	19269.5	76798.2	89181.9	101639	17340.4	29881.9	10630.7	10317.4	21471.8	289040	37555.6	104349	6040.54	10612.5	23077.8	21119.6	4337.65	1886.63	34525	64683.6	4428.75	48511.9	80233.4	11701.3	39752.4	9040.68	194904	47802.3	1187.62	4065.75	12907.4
1.07_233.1584m/z	4449.51	2961.6	8598.91	7603.9	7786.02	9076.26	10998.6	14466.6	24530.5	21839.2	19566.6	8928.22	4806.06	7769.5	8889.63	10903.2	7689.97	13592	18301.2	15524.2	21605.6	21065.7	9122.07	9159.21	10993.1	13537.1	10294.1	25791.8	4686.47	25390.5	6199.23	7566.47	10228	5467.4	15806.5	16611.2	25734.2	13176.3	13508.4	14168.1	9983.08	4924.9	10381.6	8579.67	11134	2575.71	12502.4	17912.8	11919.4
1.07_385.2270m/z	4926.41	3636.51	4108.29	4284.58	2668.01	3542.92	2585.69	7091.29	2360.14	4772.28	4090.52	5141.23	2142.99	2542.7	3261.83	3482.49	2172.04	4543.64	4611.32	16474.4	22658.2	17359.9	9051.12	5896.05	5237.41	4750.74	2767.78	3810.19	2305.54	6120.46	5312.53	2416.84	3594.56	1990.92	1785.62	3505.9	1948.11	3044.25	4384.88	2968.38	4555.33	2219.15	2181.31	1615.08	4920.7	733.948	11506.7	11725	6201.1
1.07_467.2425m/z	14410	12369.6	10565.9	14171.6	16684	14833.5	14677.5	12080.6	18999.9	22243.5	17915.8	17383.3	20712.8	14225.3	18596.7	15716.5	12615.1	20002.2	15783.4	18005	12347.7	15265.7	10404.5	13992.9	17375.1	16512.6	13252.7	14543	12290.6	12970.2	11236	13840.2	14831.8	17334.8	11043.4	11403	16814.4	18304.8	14268.8	25409	19953.1	14140.7	15418.2	14054.9	19811	12264.1	15687.4	14706.9	11885.8
1.07_500.2780m/z	102682	111266	115494	154752	139519	108301	84695.4	103748	110144	218177	113850	90391.7	82111.3	107224	118671	106158	73939	141345	117137	111129	123515	130874	91818.7	48494.3	94227.1	68882	75859.7	140316	97758	157776	74038.8	105845	64077.3	91613.9	117999	102011	62137.9	179464	136817	98923.3	132430	149514	177440	69440.5	220681	64886.8	90483.5	91766.6	74485.1
1.07_632.3172m/z	2029.76	16918.7	14140.1	7848.47	11860.5	35444.2	13883.4	16154.8	31398.8	28371	20896.4	11278.9	8591.88	8119.08	12565.3	11679.3	5359.53	25763.3	12014.2	22639.6	17192.6	30131.1	8065	10784.9	12588.2	11691.6	13163.1	42501.6	10908.5	21282.8	10121.3	13774.7	7823.73	10987.1	11027.2	6600.95	17635.8	22137.3	13446.6	18179.4	31280.4	10382.3	19602.6	8929.96	36160.6	20677.9	6983.98	12165.5	14284
1.08_526.3119m/z	13573.2	37300.4	30592.6	54379.5	16118.4	17261	22109.8	31387	19884.8	35749.5	49053.5	20451.7	20189.8	20411.2	19024.6	21210.7	11960.4	17002.5	14716.5	35700.1	17257.8	25529.1	21267.2	15055.5	33048.4	23260.5	18384.7	39273.9	22788.5	22642.9	19942.2	17816.7	19805.6	21878.3	39781.2	23293.2	14650.6	52215.6	23739.2	31817.7	17384.2	30421.5	31449.6	30009.8	28881.2	16991.2	19666.8	40886.6	9601.99
1.09_504.1347m/z	3426.85	2878.99	1108.95	2208.49	2841.29	2924.98	4122.65	4513.72	3964.92	3176.63	3765.05	5562.17	4981.63	3347	4335.6	3658.42	2842.85	2302.82	2133.92	1456.86	2015.26	3597.93	3993.11	3826.72	4052.27	4621.67	3216.8	2082.2	1834.58	1433.03	3101.68	3954.44	3240.68	2008.72	3268.51	2977.89	4134.72	3133.74	4533.02	3934.97	4056.77	3911.94	4520.38	3360.02	2573.3	2019.1	2673.76	2398.82	2132.91
1.11_476.2781m/z	87764.6	174176	117750	219056	332801	348637	127877	204402	212464	421964	270429	301286	121762	98725	118927	156172	109619	226771	142827	352439	151132	230887	102384	111379	144907	186931	188431	253697	139590	164830	83003.2	102347	129706	244123	270002	94621.7	164445	292920	195124	228717	274505	195207	171703	176156	343425	145558	89416.8	98200.9	138899
1.15_381.2112m/z	346509	496497	493732	458275	541608	487590	416712	462188	499811	482824	629415	640644	497042	579870	593325	609075	502143	652417	568608	633673	737693	702129	475395	547978	664223	731408	523473	597159	192579	561094	463761	416005	501700	400873	509574	724668	581469	495331	579587	595595	506023	403036	565670	604485	594150	276177	607772	629720	462137
1.15_590.3458m/z	51608.1	144266	55639.6	121990	76220.2	110777	58437.6	61361.3	108800	119797	189957	60845.9	120342	58503.4	88886.1	75225.2	29252.9	89053.7	84542.5	113882	77625	124750	64242.1	37986.4	73371.7	60037.8	66372.5	308899	58555.7	88094.4	40172.5	61784.2	32749.7	104518	116263	51858.6	89914.3	234765	65778.1	158300	94663.3	72019.4	82322.3	74348.6	140354	52046.9	78962	92938.5	30861.4
1.16_467.2429m/z	577.374	2908.68	1535.61	1269.96	1102.54	2198.62	1221.15	870.836	1899.07	1773.19	2013.05	1890.33	2031.21	1305.09	1888.98	2234.8	2115.52	3798.48	1923.04	1643.76	1855.03	2408.88	1923.6	955.84	2190.76	1890.52	1160.43	4482.68	1748.35	855.511	2256.62	1740.68	974.401	1023.97	3354.29	1372.45	1350.59	793.682	1348.45	2283.45	1373.28	1237.82	2725.16	1834.82	3834.61	1648.86	849.658	3217.58	1553.73
1.16_530.3235m/z	7514.49	15903.3	8104.34	21515.9	8988.22	10318.7	10394.6	11926	11378.1	14901.9	25490.2	7893.77	9596.38	11777.2	12707.2	8154.62	6553.25	9645.21	15382.7	21664.8	12574.2	22396.3	7398.91	6277.73	13141.2	10659.8	14309.8	49757.5	10091.6	14510.8	5614.5	9274.65	4777.66	11264.6	18142.4	6530.83	11118	34805.5	6300.82	22525.6	12136.1	13327.1	12802.6	11349.8	20826.5	4610.54	11917.4	16842.5	3997.51
1.19_502.1379m/z	2601.09	816.262	610.71	938.399	2230.06	671.766	2151.08	1690.85	681.44	520.882	729.557	1899.35	969.373	1100.56	2496.17	3053.9	1644.25	2744.02	4548.85	7338.66	9215.53	12677.7	10507.1	6280.71	4303.83	3425.58	2429.02	1419.3	1392.66	1338.56	2408.52	1345.23	1021.71	615.759	2961.39	1954.76	556.815	634.564	815.444	1735.22	1408.35	2767.98	1860.81	2691.89	1697.87	1970.27	1740.17	2179.67	3079.28
1.21_321.2112m/z	201139	2.93276e+06	402460	8440.58	136726	700.439	42856.5	3.58694e+07	54556.7	4716.32	4710.7	156881	574619	5.2439e+06	4.08385e+07	1.02388e+08	1.04375e+06	35455.2	20741.7	252951	31851.5	5337.49	5967.56	149397	339801	1.87384e+06	1.08451e+07	4.57017e+07	4.61312e+07	3.31138e+07	1.35717e+07	1.43002e+06	6026.4	1.33999e+06	1.29655e+07	337250	1.84136e+07	2.71636e+06	294640	220966	1.10669e+06	32234	8.80874e+07	8.6794e+06	1.6385e+06	306045	2.33049e+07	345460	2.46211e+07
1.24_738.2747m/z	5500.03	9546.1	5407.27	4042.14	3350.81	4877.42	4876.7	8652.3	5400.72	7513.35	4709.33	12653.4	5677.17	6935.34	5405.77	11342.5	3913.25	3834.62	6199.94	8062.87	6189.27	7486.48	7227.11	3412.59	7832	5478.83	5452.76	3017.9	5880.67	6210.77	5351.44	7060.56	5157.89	6844.71	7582.95	7508.54	5951.44	7538.96	7144.89	5406.73	6741.75	6866.41	5176.63	6646.03	10242.8	4413.76	4937.14	8318.9	2738.7
1.25_1035.6620m/z	165606	337087	279152	1.14817e+06	299474	337109	227145	292362	260374	402701	423012	274392	167890	75603.3	152344	267301	151968	277576	228210	406670	305108	274388	145961	173966	232804	199551	208221	348657	302773	381609	180805	268175	214006	306787	252747	199588	131862	741597	224872	199903	268394	295066	270939	194271	543733	167164	138737	502208	165221
1.25_480.3094m/z	1.07195e+06	1.47936e+06	1.16112e+06	2.29729e+06	1.3696e+06	1.36023e+06	1.248e+06	1.37667e+06	1.33892e+06	1.59323e+06	1.59032e+06	1.41721e+06	1.13016e+06	781082	1.05512e+06	1.27691e+06	1.0422e+06	1.33738e+06	1.24358e+06	1.64274e+06	1.21276e+06	1.38447e+06	944510	1.12582e+06	1.24525e+06	1.24698e+06	1.18316e+06	1.47459e+06	1.31816e+06	1.34053e+06	1.14756e+06	1.27195e+06	1.20154e+06	1.36526e+06	1.29448e+06	1.17094e+06	967147	2.1902e+06	1.34478e+06	1.12753e+06	1.45811e+06	1.33412e+06	1.32384e+06	1.17249e+06	1.96632e+06	1.13207e+06	979755	1.80562e+06	1.06702e+06
1.25_481.2569m/z	3786.87	6919.98	4581.83	10046	5766.48	5268.42	3702.26	5188.76	5104.33	6825.38	6490.54	5609.28	3892.49	2736.8	3016.88	4536.9	4251.22	6086.92	4978.27	8218.77	4022.63	6087.17	3301.24	3757.71	4948.3	6420.92	4240.4	6394.8	4984.12	4956.06	4812.63	5118	5131.84	4114.05	4878.6	4614.44	4110.98	7727.83	4865.86	4500.15	5347.1	4786.47	5035.31	3954.78	8513.35	4272.23	3533.35	9273.67	4323.83
1.25_540.3305m/z	6.31805e+06	8.69743e+06	6.80165e+06	1.31128e+07	7.96003e+06	7.93478e+06	7.22898e+06	8.11742e+06	7.94531e+06	9.32081e+06	9.29204e+06	8.32742e+06	6.63204e+06	4.71352e+06	6.20917e+06	7.51321e+06	6.16969e+06	7.84165e+06	7.1981e+06	9.61507e+06	7.06942e+06	7.99188e+06	5.5938e+06	6.64088e+06	7.33397e+06	7.33745e+06	6.90194e+06	8.58245e+06	7.56676e+06	7.74682e+06	6.79745e+06	7.54102e+06	7.02965e+06	7.96334e+06	7.55971e+06	6.83242e+06	5.73346e+06	1.26865e+07	8.03085e+06	6.60581e+06	8.63692e+06	7.83128e+06	7.74647e+06	6.8799e+06	1.14308e+07	6.63076e+06	5.98048e+06	1.0441e+07	6.29572e+06
1.25_540.4430m/z	7845.22	8770.14	6509.72	23901.4	10291.5	10758.9	8654	8115.3	7543.59	12014.6	14103	13026.5	9488.7	5051.07	6831.86	8641.94	9689.53	8973.73	9345.48	16121.5	9499.7	11918.9	5239.06	6980.93	7986.03	12114	10593.4	8778.46	8896.06	11284.1	2406.5	8288.19	7541.99	8796.72	8584.82	7035.71	4735.74	22479.8	8259.77	5669.85	10330.9	7509.6	9267.04	7256.22	17536.4	8355.91	5542.9	18952.2	8268.5
1.25_540.5270m/z	4975.78	24331.1	14303.1	379305	19010.9	21136.5	10218.1	14556.3	11665	22654.1	26482.1	9861.54	4258.66	842.051	4373.18	9217.07	3799.46	10536.4	7437.25	19116.3	15186.9	12531	4839.56	4617.18	7554.92	5122.06	5038.38	11942.4	11237	20873.7	6470	15077.4	8123.21	16058.5	11065.2	7364.28	4501.17	80895.2	7690.26	9034.33	9727.65	12556.2	9574.49	6657.29	29706.2	4418.36	3581.1	32142.7	3894.06
1.25_608.3176m/z	33669.8	45298.9	33968.1	50345.2	40979.9	45218.7	43769.1	42068.3	43040.9	48344.6	44331.9	42001.3	37820.6	27704.9	36297.9	42269.5	41187.2	44306.5	46196	55631.7	42998.8	47322.3	35296.2	36490.1	48208.1	45638.1	36555	52237.8	42850.2	41807.1	41976.3	40669.1	35909.7	44701.7	43304.5	40051.1	34115.9	58299.5	41192.7	33802.5	51084.1	43118	43188.1	40620.5	59744.2	39705.6	35894.3	59039.6	34977.1
1.29_493.2417m/z	8964.13	11119.2	6902.01	3965.47	9435.28	14804	12155.7	8498.62	12817.1	13633.7	14917.6	13984	15509.4	16284.7	10243.5	12069	8271.08	11760	11869.9	11422.2	9277.67	9129.9	9009.96	9506.18	12120	15341.3	9887.04	10743.3	8692.38	6639.58	14806.2	13871.8	6348.23	9382.03	16373	11241.9	7075.7	10165.5	10983.7	22267.2	12508.5	8047.58	6362.09	11151.4	11793.4	11537	10134.5	9826.54	13128.5
1.29_596.0090m/z	7861.86	818240	876244	796641	756961	837785	691484	643494	599378	672917	801.673	573298	576127	577727	573871	551850	544639	2079.73	3666.19	450785	487.434	414590	412978	1030.17	1295.22	866.878	1929.66	478520	2707.91	542744	753434	819.339	670495	807116	765380	724019	575487	747357	1455.57	1090.27	558222	617018	570254	639.811	561750	473806	1288.1	424652	455437
1.31_452.2782m/z	28956.3	38437.3	45377.8	123131	91766.4	51879.9	45983.5	42045.2	40286.4	51118	58562.5	65950.8	19669.2	14883.2	27468	42144.2	26668.6	47481	51290.9	65258.5	30818	56329.5	20555.7	25081.8	40422	35012	23621	36894.6	46324.7	41217.9	35635.9	50267.9	39292.9	44043.8	58748.6	13949.2	14169	82603.5	44424.5	26935.4	30303.6	62789.9	47676.1	34674.9	90818.1	30842.3	20583.1	26249.7	20675.1
1.31_506.3249m/z	142213	179054	162963	278932	253286	280610	150155	192091	267250	254014	272428	204418	290262	120825	189901	206654	100731	272218	214162	267097	238729	250397	171822	151473	145164	171267	160416	310841	202825	236042	148328	164480	127186	173442	187701	188309	133513	336947	139845	211236	288297	161363	196273	170656	335918	215146	128334	210940	150934
1.31_566.3458m/z	989909	1.34154e+06	1.14289e+06	1.86302e+06	1.72662e+06	1.89093e+06	1.01949e+06	1.34587e+06	1.85387e+06	1.7812e+06	1.92747e+06	1.46419e+06	1.98442e+06	882061	1.28501e+06	1.39526e+06	719456	1.81057e+06	1.47615e+06	1.79379e+06	1.57699e+06	1.61128e+06	1.13505e+06	990215	936462	1.16648e+06	1.09674e+06	2.07154e+06	1.32245e+06	1.54689e+06	962490	1.13687e+06	885964	1.19865e+06	1.29827e+06	1.28876e+06	920028	2.335e+06	985969	1.4435e+06	1.97389e+06	1.15021e+06	1.38209e+06	1.18431e+06	2.20434e+06	1.47014e+06	948224	1.39275e+06	1.03547e+06
1.38_478.2939m/z	12964.7	25499.7	23970.1	44687.7	61755.7	50360.5	21435.6	27620.6	42000.5	68843.8	81779.7	56183.6	42172.7	20396	20496.6	31834.6	22311.2	46270.4	20298.4	66357.9	44026.7	38930.8	21783.6	19050	19374.6	34098.1	33600.7	53229.5	22707.7	34769.9	15804.9	8636.9	18973.5	37471	54188.2	23856.5	17307.4	74982.7	14166.3	42220.5	50179.6	45683.2	27029.6	33007.3	77173.5	26316.7	16397.6	18961.1	17347.4
1.39_464.3164m/z	5412.66	5829.34	7549.58	17235	13960.5	9723.14	4486.98	14761.3	8599.02	8073.1	6380.74	9616.36	7530.46	4558.18	6328.39	9315.27	6661.56	10411	6791.24	13279.6	9478.08	9250.13	4208.89	7309.17	6346.41	4415.62	8814.36	8094.03	7915.65	12236.8	5949.15	8532.34	7094.81	9213.17	7008.17	4207.53	6746.6	9460.81	2728.77	8763.33	11546	3407.34	10251.2	7495.35	17552.9	6270.74	2979.81	14792.3	4534.56
1.39_524.3355m/z	16114.6	19149.2	22328.4	38431.2	23198.9	34003.7	19581.5	35330.2	27788.5	23592.6	22839.1	26180.9	21767.8	11940.2	10882.3	30208.2	17820	33158	26712.9	25547.5	31226	36632.1	20412.1	25801.7	17404.9	7571.9	23167	24763.6	25341.4	43869.3	12395.5	21258.6	12154.6	19900.8	17317.2	19865.5	14900.5	28863	17830.9	15404.8	37129.7	14748.7	31727.9	26563.6	58696.8	24420.7	12069.1	47240.3	9861.95
1.39_592.3611m/z	1128.44	1999.22	3775.43	11427.5	5710.55	14528.1	3686.11	7113.24	1486.33	6544.43	6051.54	3103.28	5873.64	1403.84	2896.12	3447.59	774.011	9094.92	3418.54	5462.71	7483.56	7971.12	856.246	2903.4	2769.01	1524.6	5911.96	4885.04	2217.08	5755.98	1456.09	4624.84	3261.92	5052.37	3775.62	4812.03	3179.36	7300.43	1821.68	6486.69	6480.3	1073.62	907.602	1417.54	5712.82	5076	3024.37	7340.58	1421.8
1.42_207.8395m/z	268.094	137.011	169.636	50.1361	57.7685	168.973	115.168	116.496	161.491	306.871	121.979	200.638	86.1221	676.12	283.365	249.685	959.241	573.549	223.006	98.2466	99.2507	99.1695	104.72	146.27	183.532	783.999	1361.7	299.738	648.931	311.807	141.642	71.1949	137.751	50.8534	246.035	144.777	162.252	121.815	71.3606	158.459	245.032	350.974	358.489	249.798	1304.92	741.467	149.27	98.7086	82.8665
1.44_526.3511m/z	12319.3	18754.6	20647	66146.9	39578.1	31762.3	17557.6	45827	38842	35024	33843.3	25560.9	28678.7	9610.65	16748.5	18354.3	19871.7	43349.9	15348.8	32069.4	32809.4	29574.4	23707.1	30113.2	15260.7	20657.2	23277.4	29445.5	25629.7	32399	20572.9	25166	25988.2	15049	14755.1	14084.7	37955	32196.8	11560.2	16119.5	45424.7	22224.7	23267.5	18875.9	40460.8	18266.9	10419.2	60989.1	17391
1.45_466.3334m/z	6661.91	4763.28	9312.37	23734.7	12308.5	12502.6	9549.79	8945.5	9392.91	14815.9	10242.9	13766.1	8854.45	2746.36	8579.69	14880.9	9012.36	14729.1	3590.25	12545.6	10996.8	10267.9	10223.1	9197.07	8109.37	5276.99	4608.48	11290.5	11551.3	10001	9635.5	9163.92	7324.95	6469.11	4779.7	3612.27	13857.1	13565.2	7105.41	6611.86	15577	9160.57	9435.71	7836.33	18675.3	11392.5	4502.45	26243.3	5918.37
1.46_554.3459m/z	19650.1	25923.4	43984	56388	21430	32758.8	33693	41138.9	30184.4	64176.6	46888.2	23477.4	37025.6	18094.6	19189.2	23589.1	18565.6	29987.8	22095	39035.3	34313.2	36388.3	44385.9	21568.3	36442.8	14381.5	22136.6	31977.5	27756.8	43563.9	26418.4	31820.1	20484.6	25138.5	49252.2	30563.4	12662.5	36564.7	24061.8	45557	46469.3	32754.2	41654.3	36796.7	31609.2	47442.4	18506	54095	35854.6
1.46_653.4050m/z	280726	228877	299332	261493	355933	283533	264998	263589	318179	228419	276487	307659	195358	226393	264944	276532	174401	265817	310260	251373	332521	352027	219115	276183	275651	280998	250864	259366	324890	275999	251485	242167	375854	228204	279015	240207	273842	213840	256768	257163	191121	219570	254663	255449	250864	276996	269731	318780	229028
1.48_701.4258m/z	195069	174943	194313	169530	243440	189289	202284	203023	252033	174031	205284	241638	170228	171839	218944	227879	164855	188140	242152	200414	250050	260105	181102	211019	251892	243671	218954	243694	290675	233085	180703	178212	255843	172815	221696	201588	230994	164496	225846	196113	176012	169606	205074	192404	198795	206973	207457	234326	191944
1.51_552.3669m/z	7539.72	2729.73	4984.56	30140	14139.7	10070.6	5202.47	11306.9	6842.31	9060.88	6518.89	7587.84	6947.5	1671.25	3458.8	9172.84	3560.88	14950.3	5947.29	6608.74	10416.7	11557.4	3973.08	5402.65	1602.29	1499.8	5633.66	6296.79	9617.97	14316.9	2299.07	6199.25	8174.71	7215.09	4163.75	10205	11316.4	5553.64	2918.38	3805.7	19721.1	8333.85	4709.9	7089.61	11309.8	7326.69	2624.07	21504	8869.16
1.60_508.3408m/z	14483.6	25555.5	31511.1	60003.2	35345.9	27213.2	22803	24552.2	19083.1	31398.3	30747.4	29032.5	20718	8593.5	11209.2	20960.3	12362.3	23143.5	14334.7	34861.9	22402.6	24427.5	17075.9	16048.1	22322.8	19184.6	18005.4	25208.9	21383.3	27509.7	19322	17975.9	9919.74	20772.2	30135.5	14519.3	11464.1	31224.2	19393.3	18847.6	22546.3	23555.2	25301.3	24527	22891.5	22817	14261.7	29950.2	9195.34
1.60_568.3615m/z	184017	259747	265058	457100	274016	228407	224739	235632	215972	353273	278926	277278	245515	119527	183687	236118	182647	245598	201746	335981	235412	232061	207372	194121	255991	213070	216641	256041	209255	307424	180579	226835	172287	239120	330769	184967	167762	328046	246198	246379	252949	257315	267551	240390	256060	216785	190772	306267	163093
1.72_271.2285m/z	13327.2	4504.19	10932.9	33474.8	8144.03	6724.47	5497.01	8994.93	4011.14	7372.54	6437.21	6246.5	8032.34	7252.98	7902.31	4312.15	11586.1	6476.02	3137.97	7302.55	7157.99	5471.37	8156.15	4012.93	4428.25	2228.31	5837.24	2916.21	4726.55	7197.6	4545.99	7008	5634.14	10664.2	4389.18	9687.46	8779.02	10642	9215.54	8837.12	3438.71	9188.1	6947.46	10145.6	5108.59	5205.93	3643.59	8009.29	8157.2
1.72_467.2425m/z	4072.7	7729.6	4452.89	4824.18	5291.79	4949.23	5049.66	5696.17	6998.96	4566.95	5098.11	7802.3	10077.1	871.877	4145.58	4859.77	2401.26	2261.27	4390.63	3080.56	1912.8	3412.54	2127.4	1504.3	4220.67	3086.86	2271.41	4449.17	1572.13	3190.02	7951.99	5974.78	3833.96	5830.92	8636.17	736.759	4286.87	3266.23	5067.18	5158.69	5379.42	3586.12	4494.6	4495.33	8145.22	3510.55	2132.16	3319.02	2438.82
1.72_509.2884m/z	833.239	3578.06	5074.61	13264.5	9673.42	5350.28	1946.53	1417.34	1250.05	1832.82	1060.05	1753.28	1264.21	842.289	903.582	1532.98	1262.7	2076.77	1199.87	2726.46	2732.48	1892.32	1683.73	1250.49	2406.51	1385.7	1995.03	1963.62	1380.06	2194.87	2267.78	1216.83	1844.86	2064.56	3448.65	1015.37	571.378	2070.96	992.311	2443.34	1413.73	1778.17	1637.01	700.363	1464.43	1647.39	1321.32	2978.37	1224.49
1.73_206.9734m/z	10379.3	13704.1	16391.2	9072.51	18407.3	13058.5	16861.6	11206.7	15152.2	14773.2	15552.9	17571.4	21736.4	19755.8	20076.9	17722	13958.3	11544.3	11452.5	13841.8	11035.4	15479.1	14475.7	14600.1	15156.7	16358.1	16580.6	15642.6	12187.7	10360.3	10028.2	14934.7	15434	12147.6	17628.3	8195.68	13157.8	14586.6	16035.7	19942.7	15569.5	17692.5	16955.5	16479.6	14279	12100.9	13074.7	11233	8447.42
1.73_508.3406m/z	285725	408941	420008	718431	454234	370069	355240	386304	367438	534452	432439	457020	384830	213581	286653	379337	311907	373895	306978	523693	391957	375456	330053	308597	373778	341533	341876	429718	333218	481164	288144	345368	271577	386357	493167	294535	281116	526712	376332	391981	405628	395853	406217	375865	416879	341305	300704	465206	265653
1.73_568.3618m/z	1.81334e+06	2.59436e+06	2.72014e+06	4.37026e+06	2.919e+06	2.39233e+06	2.3577e+06	2.51467e+06	2.43151e+06	3.39069e+06	2.75643e+06	3.0114e+06	2.5555e+06	1.45858e+06	1.97711e+06	2.45615e+06	2.01011e+06	2.30971e+06	2.00766e+06	3.25591e+06	2.44739e+06	2.36429e+06	2.04874e+06	2.01035e+06	2.49752e+06	2.33119e+06	2.31565e+06	2.77247e+06	2.13209e+06	2.91555e+06	1.84115e+06	2.27064e+06	1.82909e+06	2.6075e+06	3.21762e+06	2.00081e+06	1.84666e+06	3.38313e+06	2.51751e+06	2.56005e+06	2.67308e+06	2.64601e+06	2.74186e+06	2.45472e+06	2.65361e+06	2.09561e+06	1.92974e+06	2.84986e+06	1.7145e+06
1.73_698.3190m/z	3055.58	8907.58	16951.2	40425.5	19825.1	17263.5	12368.7	14868.5	8544	26049.4	13383.9	17394.6	7220.1	7031.21	15098.7	19064	6713.12	15841	8811.4	17698.9	18510.9	14878.8	8193.69	11459.5	10256.6	8460.41	8890.37	8914.85	11891.4	14174.9	11868.7	12703.1	1839.06	7543.06	12730.9	5004.43	2463.61	13741.2	8146.99	14006.1	18466	17568.4	15645.9	14526.7	6611.86	12405	9301.02	15524.4	2883.6
1.82_480.3095m/z	37951.8	58055.5	61980.6	114321	78767.3	54150.3	54241.5	50940.7	51951.8	96600.4	74335.6	99972.9	43413.3	24914.3	36686.1	54135	35261.3	64681.8	52351.9	77170.9	52831.2	60585.6	34390.2	33712.2	55028.4	40035.9	44551.1	65619.2	69120.7	79079.3	40665.7	58608.6	27194.5	46885.8	60987.3	27669.1	24807.8	112256	56714.7	50873	55181.8	90494.5	63454.9	44780.7	70665.4	34441.2	27577.4	32983	37661.4
10.21_848.7705m/z	16098.7	12059.1	17582.8	12551.5	14532.8	9679.69	15921.1	10796	17210.4	36045.6	14879.3	17913.7	14674.3	16508.8	20387.8	24551.7	30264.2	20606.9	12353.7	13046.4	18840.6	15172.8	20018.6	10518.5	15726.3	10167	23628.1	11809	13576.3	16341.9	19389.9	28381.7	17863.9	22585.8	11139.4	29190.2	11559.3	13030.2	11676.7	17050.7	26388.4	20003.2	18169.6	13398.1	18286	17816.7	17463	15236.3	20249.7
10.45_1033.8429m/z	9660.24	11257.5	8960.84	9018.3	11829	9693.98	7887.58	6748.08	8885.99	5507.51	9900.12	6546.44	11093.4	10179.1	11849.9	8797.07	9795.13	5608.52	7709.24	7206.05	14587.4	24244.5	19408	31116.5	16633.3	18945.7	5093.34	11555.9	1335.25	15026.5	17083.5	7886.98	10385	2301.55	5719.32	10288.3	10090.6	14632.9	5639.58	6502.25	8847.32	10340.5	16034.6	9143.17	7525.32	2064.15	3627.39	6890.8	3466.58
10.59_1015.8325m/z	58149.1	29670.6	37514.7	33666.9	41673.9	70274.6	52218.9	45379.5	84073.7	45835.8	36351.4	34515.2	55098.6	54648.5	49078.2	48243.4	54531.6	81246.9	48953.9	59802.8	84042.8	100083	90119.8	74312.2	73488	66830.8	63285	84634.7	26915.8	82746.4	70253.9	31949.1	81089.4	39376.3	29273.4	45274.6	62900	33275	22570.2	32628	46584.6	33511.7	45525.3	51360.6	48586.3	73037.2	37804.2	74595.5	79390.4
10.74_341.1464m/z	13572.6	16076.6	13769.6	13560.6	19930.2	14482.2	19166.5	16696.5	15893.5	15399.4	9818.75	17805.1	16203.8	19531.5	15817.8	15262.9	17907.4	14406.1	15490.3	18524.5	10223	15626.1	11417.8	14246.6	13818.9	17528.8	14629.3	15411.8	13084.3	9925.44	14056.9	13245.9	12756.4	15555.7	20559.1	17351.1	17199.6	16982.8	21842.5	10892.9	14400.4	18445.9	18197.7	11296.5	15331.9	17940.4	15948	14800.4	13410.4
10.75_1071.8937m/z	7744.74	10872.7	8664.57	6135.02	7358.93	15723.3	5655.99	11112.4	12762.5	3436.97	5062.93	12186	8874.76	13217.3	7330.4	11366.5	6068.71	10314.1	8534.18	6806.09	6611.45	11752.1	5410.4	14616.5	6109.13	15856.6	7675.36	13816.6	8447.25	7898.92	10468.9	6833.25	11268.4	2082.19	2191.29	9593.1	7025.78	6143.18	6778.03	3695.16	6740.13	6519.16	6571.03	7830.24	7442.51	10350.9	7068.9	8215.98	6305.68
10.82_942.8446m/z	51959.6	37546.8	45997.4	34808.2	33948.5	46393.8	39203.7	38462.6	24503.3	35107.8	25132.7	25828.4	23332.5	21513.6	27639.9	45820.1	45703.7	30387.6	24929.3	23735.4	28017.4	28832.1	32056.1	33666.1	35773.8	47890.3	35835.3	58361.3	48127.4	34760.7	46864.8	45116.9	56639	38545.4	34132.7	25203.5	45404.3	42064.5	33118.2	26885.3	28074.3	33533.5	32676.5	31075	27964.9	24104.1	30503.3	34232.2	34978.2
10.86_1073.9110m/z	53726.1	57890.9	54263.3	33800.8	48146.3	66113.6	71220.2	75915.9	100446	40253.1	69864.5	75983.5	52760.6	83993.2	82035	75881.7	75870.9	108940	84203.5	76003	90638.6	92505.2	83743.4	122688	73222.8	84803.5	98536.7	104804	103375	92759.4	48286.9	67108.4	107709	59943	46418.8	59291.1	72017.9	59341.6	55257.1	53582.3	48980.7	45451.7	66472.7	77176.5	87323.6	91479.9	72658.7	104148	82492.7
10.87_316.9485m/z	2811.78	5395.28	3752.85	4500.11	4973.29	3602.64	4518.85	3947.54	4007.04	4024.86	3708.6	3525.59	1635.81	2171.1	2166.43	2584.4	2516.66	3987.85	1447.85	2907.3	3367.78	3245.07	1580.13	3135.28	4082.2	4149.05	6963.49	4275.64	6036.74	5316.37	3086.38	4780.39	3774.43	5611.41	3773.63	3834.26	2241.38	974.039	2271.31	2444.18	3434.39	3420.64	2245.18	4004.09	1394.51	3596.4	3767.54	3007.47	3489.89
10.88_959.7735m/z	21432.8	22779.5	23263.7	13562.3	16324.2	28578.4	19202.2	25046.1	31619.3	21461.1	19681.4	30480.8	30204.4	26422.6	28779.4	25049.6	29044	42542.1	24976.7	28463.1	25630.6	42355.8	24026.5	35879.5	21146.2	38926.4	27434.4	21074.6	30526.1	34301.6	32301.6	16422.4	30816.9	21337.7	18764.2	21526.6	25751.1	19492.3	19640.6	17775.5	19298.5	18479.2	24976	25623.9	30290.2	34040.7	18804.6	29625.1	32654
10.92_930.8479m/z	72879.9	58513.1	47773.9	50059.9	32483.4	45775.6	48046.8	49660.9	52900.4	61831.7	49563.8	57485	38311.9	47682.3	52048.4	60012.4	55331.7	66503.2	53450	55883.7	48183.5	40281.3	49588.6	54467.1	60041.6	77552.9	60721.8	83993	45371.1	39155.4	59913.3	51010.2	64462.4	54701	39633.8	51116.7	65726.9	56361.1	57414.1	39386.6	59226.1	61981.3	54288.3	56067.3	42227.7	53479.7	58756.6	71087.2	59808.3
10.97_164.9285m/z	4104.77	1675.57	1878.44	2104.19	3769.22	2520.02	1793.18	1544.42	4145.25	5937.36	3388.47	4038.22	3601.97	3485.49	2174.92	1646.99	2573.47	2665.8	4704.14	4210.36	5324.44	4860.78	4405.93	2366.78	4649.35	3731.29	1746.4	2709.36	2101.72	1765.64	2884.05	1688.64	1659.56	3270.68	2895.75	3271.25	3915.64	2871.24	5388.74	2866.8	4419.95	3656.97	2005.36	1076.62	1314.97	2871.5	2915.75	3133.33	4580.55
11.03_958.8749m/z	30687.8	17856.1	29838.8	17507.2	9521.53	22764.3	29501.4	20644.7	25723	39584.4	18658.3	24600	17789.8	20960.1	21407.1	23843.6	31704.5	27038.2	20292.8	15353.9	27792.8	25093.1	30951.8	32085.5	27253	19799.7	15970.9	15423.9	17457.1	19933.4	23080	32837.8	19596.1	29232.1	11935	38269.1	32788.5	16236.9	19499.9	18727.6	24259.6	13612.4	20756.3	15503.2	17744.8	20867.3	17406.2	23169	24356.4
11.05_932.8602m/z	13458.4	13385.3	6665.78	8324.89	11192.8	8984.26	13745.5	5771.08	16174	11908.4	6241.37	8557.87	11519	12156.3	9432.91	14510.3	20646.5	14955.9	10881.2	12239.2	12386.9	13957.2	15278.1	13162.2	4816.08	7585.53	20133.2	15010.6	20896.1	16944.9	14661.7	11042.9	6477.39	15415.4	4274.34	10466.1	9781.29	7931.58	8277.61	4707.51	9123.04	6311.53	10076.5	10866	14008.3	18192.7	11441.1	10974.6	14666.2
11.05_944.8591m/z	22681.8	37471.2	23931.7	32272.6	18909.1	34586.5	29395.2	23500.4	24157	22439.1	12707.7	5356.86	14727.4	9420.61	12012.4	18600.2	25194.4	26493	20697.5	27360.4	34411.7	14584.6	29958.9	22888	26483.9	31551.8	28903.6	48366.2	31417.3	28168.4	17701.3	34423.6	43797.6	34186.6	31119.7	21207.7	16039.1	23485.9	13694.2	13138.6	11538.9	11598.4	10659.7	20438.2	21495.6	13623.8	27590.2	29939.6	33607.9
11.24_1053.8847m/z	124134	89384	77203	59128.2	70416.8	130662	78865.7	150264	147124	73187.1	88688.8	102617	132218	106811	164548	80274.5	93924.2	197856	115688	106568	115220	195933	140965	247119	99921.9	167594	133177	193635	137687	164244	137569	84191.6	163839	43540.6	54631.1	82920.9	162156	66949.3	97318.5	75121.7	84499.5	47842.5	113618	112699	118020	206517	74165.8	216140	180969
11.31_960.8887m/z	17854.6	5278.41	4851.32	4351.96	4992.6	8855.54	7235.49	9287.87	14428.4	22971.4	9145.69	9582.58	13829.4	16522.8	14740.3	16724	26753.7	23385.7	10967.5	16811.1	11416.2	15038.8	17958.2	13822.2	6558.03	9215.17	17131.8	17797.4	16661.2	12506.9	13184.8	11194.9	5973.31	10933.7	5821.42	10929.6	9186.01	9737.01	10813.3	6743.95	16297.2	9187.55	13941	13649.4	7041.34	23192	7598.97	13602.5	18560.3
11.71_185.0287m/z	1301.18	2679.27	2045.63	2186.51	1589.38	1539.53	2093.92	2588.23	1663.28	2712.96	1733.06	2813.13	1611.89	3289.71	1169.07	1965.62	1579.29	3439.5	4106.06	1801.21	2630.81	3880.4	1257.35	3828.67	1615.05	3666.76	4433.29	1396.44	2108.03	3139.09	2305	1753.81	2380.63	2171.02	1588.7	1021.73	2477.48	1593.08	1719.98	1519.38	1990.15	999.861	2172.84	2344.5	2660.28	2022.82	2575.07	2897.33	2876.22
12.59_621.3195m/z	24346.4	10629.7	11713.4	11359.1	15946.8	10506.8	14792.4	16896.6	18083.1	13284.8	10309	13085	13471	17357.6	12148.8	11601.8	14260	12096.4	17192.2	16820.5	9854.3	12260.8	12901.3	13788.2	12331.8	14283.9	15699	17086.4	12573.3	6643.86	12999.6	15728.4	16423	5261.7	12081.9	13016.3	12350.4	12038.9	18026	10924.2	12195.8	10742	15673.3	22433.5	17285.2	11300	12302.3	11011.2	10991.4
14.71_160.8428m/z	653.893	598.236	170.687	146.088	162.575	204.605	164.648	274.656	576.038	412.238	416.238	528.83	619.085	194.418	550.195	500.097	762.282	459.252	314.778	780.335	215.737	305.672	709.433	278.942	201.703	613.506	480.054	182.747	187.337	562.083	301.48	217.352	267.922	229.075	329.284	535.354	390.933	391.683	251.471	369.912	450.079	190.658	302.175	567.432	420.031	279.478	610.336	691.905	509.757
14.97_157.8720m/z	2506.18	4455.33	2763.9	2324.2	2941.45	2270.7	2583.36	1146.78	1672.32	2012.11	2294.33	3806.77	2924.73	2654.39	2829.5	2730.8	1291.98	1864.32	2802.31	1715.13	1963.97	2525.45	950.726	2123.22	2153.26	2066.68	1990.32	1134.8	1936.89	1144.19	2918	2811.32	2111.03	2133.44	2894.92	2235.4	1718.4	3001.92	4016.39	2732.89	2162.35	3197.2	1814.78	1868.03	1730.21	1898.03	2070.04	2483.94	1618.84
2.01_439.2891m/z	18810.8	16969.3	26347.3	21625.3	17228.4	15690	23767.9	21360.9	23082.9	23424	21430.4	22592.8	20047.4	29069.1	32976.7	25000.6	14405.5	26197.8	27134.3	20265.5	31352.2	29880.5	21701.2	22699.4	26899.7	22599.6	17424.5	20519.2	1135.51	21604.4	27492.6	18921.6	23959	12696.9	23329	14662.4	30519.5	27733.9	27561.3	20621.5	26805.8	18356.3	26223.5	18730.6	24203.4	6455.93	23378.9	23292.7	22502.6
2.10_405.2648m/z	1485.1	9269.14	12598.9	94828.8	12280.9	11202	10179.2	7842.86	1200.74	8871.55	2182.89	3344.29	16992.8	3881.69	10544.9	3936.23	12796	18378	14558.1	7852.6	6252.23	19107.9	14130.1	12224.4	13937.7	4831.75	30176.5	983.003	7894.99	12144.5	7149.95	4713.82	10723.7	12588.3	171.089	9203.5	2732.53	10121.2	3006.66	2777.62	8824.18	6987.41	1146.42	6001.03	4255.52	6422.09	4453.67	53734.9	22895.6
2.10_464.3162m/z	6523.4	11322.6	22001.1	24856.3	20575.8	20470.9	11216.7	15155.9	12413.7	17938.8	12610.4	10152	12518	7214.84	12355.4	10919.7	10319.2	14319.4	7890.76	19790.4	17251.3	19344.8	14891.7	10540.4	10966.9	4532.03	8301.6	11054.5	9429.85	13356.8	8435.61	10003	8711.28	7122.77	9432.15	11489.3	10036.6	15479.7	7841.21	6835.5	13322.2	8360.55	17068.6	13952.2	13029.5	19101.6	1497.23	38131.5	12870.6
2.36_483.1750m/z	863.75	1699.52	1105.68	22732.2	2025.49	3300.76	2343.81	1845.15	246.825	1191.75	243.774	477.997	3501.45	644.747	1994.96	548.922	3452.98	4586.49	5146.97	2513.65	1881.88	3605.78	2171.9	3451.86	782.119	2131.43	7501.48	693.293	1519.21	2342.27	3242.98	1485.01	2403.17	1721.35	926.585	712.042	653.704	1748.3	0.686935	1198.82	781.249	1713.65	1537.68	498.875	2161.44	4291.54	1807.53	32249.5	1877.21
2.48_467.3743m/z	110342	83017.9	96363.4	185341	252413	134627	119453	113206	85380	132427	90024.8	89793.7	101322	64033.6	165785	100788	92129.2	111639	77113.2	94553	68887.9	70616.3	111683	75816.5	84173.3	68861.6	117443	158932	134105	111391	91557	68322.5	127631	80516.8	71885.1	78483.6	122097	75355.5	84219.6	59400.6	70518.9	55522.1	62846.4	55923.3	131205	56222	67379.4	87852.2	70144.4
2.61_134.8669m/z	309.829	532.21	426.562	998.295	2762.54	712.841	904.074	257.481	220.895	50.9426	162.621	137.412	172.421	265.994	192.154	201.442	89.4577	108.244	264.517	470.863	144.198	419.785	665.904	2042.46	312.885	1559.83	236.411	156.168	254.68	142.734	281.794	450.25	1375.32	366.992	650.285	476.884	117.785	153.512	359.741	81.5044	257.352	432.163	170.612	245.186	81.5864	274.439	132.864	286.602	182.127
2.71_913.5904m/z	38581.9	9854.84	20627.3	21220.5	43351.8	24071.2	23630.3	45635.6	26218.1	28243.1	20822	45918.8	30491.8	29754.8	18527.3	30705.2	38192.4	28257.5	16152.5	22621.1	22078	15528	23616.8	24686.1	26909.6	16805	31241.2	8693.4	16880.8	18258.8	41675.5	27841.6	30000.1	16011	15526.2	26236.5	22415.7	25075.2	44008.9	24908.4	30329.9	28974.9	19094.7	20572.7	28681.5	21385.9	31161.9	36860.7	24919.9
3.00_473.3637m/z	28111.7	11154.5	11247.6	31672.6	58933.3	38500.7	31976.9	16820.7	26487.3	35043.3	12791.7	29487.9	15814.6	12597.2	33510.9	30259.7	19924.2	22575.5	6450.96	36345.5	16108.4	58657.8	24751	46330.7	55970.8	19619.2	32272.2	29420.4	28618.7	15388	21074.6	83985.6	47627.9	55027.1	20000	13274.2	34716.9	5803.85	17862.1	26479	43805.2	9521	23390.7	15415.3	38433.5	31755	14207.7	6515.09	28227.5
3.02_567.4626m/z	15876.8	2531.68	1425.14	16094.9	18462.5	11931	1273.37	5432.74	12442.7	31740.6	22244.3	42291.8	18264.2	11172.1	7893.73	8365.85	5629.86	8831.41	1911.92	2030.71	1669.19	2773.31	9652.31	4499.87	2255.16	3102.85	4376.98	13637.3	5161.97	6847.55	7902	3745	2425.72	2819.45	2023.92	2190.41	14183.1	14481.8	9679.03	34087.7	24498.3	5074.58	6856.09	6716.3	16599.7	1015	2327.33	2278.1	3660.83
3.08_473.3635m/z	5721.62	5243.78	4942.37	9765.34	11739.1	12838.2	6315.51	2854.21	2761.52	10821.5	3827.22	3366.2	3561.7	1520	11851.7	13360.3	7645.19	10884.8	1745.01	18606.2	1490.12	18857.5	3934.05	9580.62	28563.2	17178.1	35864.3	50719.5	30409.2	10398.5	9039.61	32402.7	17661.4	19083.3	2802.22	1824.32	4555.29	1119.27	6946.76	5080.58	7567.77	2142.07	4743.24	2564.91	23345.5	28862.2	9407.48	4969.82	24284.6
3.20_493.3865m/z	3017.55	1172.78	2189.82	10792.9	15140.4	10164.2	7618.75	1650.63	2907.67	5607.6	3339.54	5500.15	3229.19	2557.17	11284.7	4758.4	4887.4	8398.96	2646.35	4836.92	4540.26	5782.63	7113.22	7826.37	4375.35	2745.58	4245.03	6270.51	6329.58	3199.24	7181.55	4920.77	6908.72	4163.79	3393.97	4050.59	6935.54	1622.71	3329.54	2792	5658.47	2180.6	6449.43	6250.27	9186.49	5334.67	4794.24	2881.83	6885.1
3.22_810.0342m/z	838745	867886	886972	799713	753797	841206	707496	673250	642449	5241.16	748521	622256	621075	615378	600442	559060	540419	1279.46	1950.3	509260	633.821	482143	466324	1084.68	453571	446041	404689	906.159	2894.46	423898	842749	889270	668299	814863	788899	762879	1485.63	811010	663193	1738.03	599739	653776	851.022	615441	555113	469060	582610	455618	497531
3.33_600.3877n	3.02758e+06	4.40048e+06	4.72888e+06	3.28889e+06	4.97453e+06	3.91697e+06	3.68032e+06	4.23129e+06	4.61266e+06	4.02094e+06	5.26556e+06	6.03855e+06	4.83957e+06	5.60091e+06	5.66922e+06	5.44991e+06	4.38279e+06	5.44899e+06	5.31231e+06	5.18271e+06	5.81797e+06	5.9633e+06	4.219e+06	5.21936e+06	5.49653e+06	6.40551e+06	4.30094e+06	4.6984e+06	771705	4.5238e+06	4.44544e+06	3.59177e+06	4.44244e+06	3.55494e+06	4.67844e+06	6.63897e+06	5.51503e+06	3.67756e+06	5.78905e+06	5.20823e+06	4.25321e+06	3.12195e+06	5.11079e+06	4.74305e+06	4.55756e+06	1.64764e+06	6.05771e+06	5.28131e+06	4.50527e+06
3.33_658.3629m/z	515117	728954	712119	512644	818273	626010	631296	667922	720757	664665	785066	948977	775789	867883	848731	860449	706706	838302	775876	821917	802767	906588	691524	861189	830068	997987	727574	761369	135244	679400	757122	566127	712884	593825	783718	995901	862482	592315	903607	777917	737524	504594	795468	757978	748520	279440	917661	819792	728471
3.33_662.3750m/z	154009	228230	244616	174595	237310	185086	158462	172392	178241	181668	218189	247405	205695	216026	213615	217282	157922	198425	206623	198315	232839	220115	161541	208019	220446	244107	165578	187238	17788.6	182763	227037	182426	186544	174176	219733	274492	233587	138942	235254	220631	175271	102270	188316	170322	169948	33148.2	234420	196458	167395
3.33_684.3957m/z	79027.5	135377	162013	119163	161993	105620	80977.5	94380.4	142532	135307	175207	179075	164863	156570	155070	149316	109715	128202	120612	122204	143321	131408	96114.7	126906	129363	171228	129210	148517	14640	141149	175689	132121	113387	90343.9	130256	189562	170385	88952.8	144286	177139	122446	72068.5	132994	130611	111004	29386	149022	131864	116550
3.33_725.2527m/z	72207.9	104093	122883	73467.7	108769	94868.2	94500	160170	146514	144102	203311	231791	167912	184913	165812	137437	101799	119091	116006	123146	120705	120423	100871	100010	125886	151766	118430	145418	20690.8	126732	118976	95396.4	108898	102852	98405.2	201555	211708	129772	204581	202665	153620	95910.8	146816	112641	113854	25143.2	144141	114583	103076
3.33_727.2529m/z	112959	172683	187561	123083	185445	143451	138199	174738	159204	133130	177499	202136	183740	233423	231092	214858	169219	186662	172505	160876	157111	170588	134831	148425	181607	200330	144816	154092	25052.3	138110	184828	161006	170456	133317	156285	213908	189188	128749	192304	194850	191004	126318	212708	187625	177682	72667	203909	167573	138555
3.33_735.2809m/z	59557.3	108327	126482	70065.7	119593	94636.4	79273.8	81672.9	93601.5	94072.9	112001	119083	100301	129760	123662	110122	97249	101782	102629	98359.5	117023	112750	94581.6	89091.4	110583	130214	84452.4	85567.6	11853.1	76780.3	119806	102779	97344.3	66784.9	86884.8	135085	133055	72129.4	119929	121676	93260.3	74382.4	107723	100583	96116.5	26250.8	127092	108524	84798.3
3.33_772.2486m/z	33227.5	65538.1	92193.5	36922.2	75653.6	64404.3	41654.5	87781.2	81820.9	77033.7	91096.2	101713	87984.3	106326	116860	99200	81456.2	94034.7	85714.3	88154.1	108099	104528	67942.2	95119.8	116081	107487	69351	68452.1	278.758	67917.4	87147.7	61728.2	74464.9	65361.8	73451.7	136076	103873	54328.2	87406.1	108472	74802.3	38514.7	94050.4	68068.5	73209.7	14199.9	107575	84015.9	83797.1
3.33_785.2733n	34410.4	80848.2	131061	64745.5	110051	71826.1	82548.9	149815	82610.3	77483.3	104947	116120	102574	132395	133838	126001	78864.6	127286	93784.5	118333	149357	148090	105796	112145	148400	135025	86621	92391.8	1606.92	98905.4	80526.7	94021.2	96319.1	53641.5	107990	178930	139226	73342.5	122957	143069	118305	45427.5	110894	107190	79822.4	29372.1	147374	130292	87548.9
3.33_813.3663m/z	166102	275593	332152	219471	331492	265488	216520	262528	274772	251537	353765	383479	362330	387784	464413	465910	327915	432380	324715	346628	384407	397268	299029	392706	378197	506695	314409	355394	37428.4	349923	330364	216547	294772	214584	295072	459122	351227	202972	355434	372178	308388	207217	413068	383594	365166	61642.5	397889	349911	295353
3.34_501.3947m/z	5814.75	4161.14	6108.72	13277.8	35758.4	28465.7	21116	12933.8	23274.6	10360.3	7621.27	13489.1	16824.7	5811.9	16147.5	22727.8	8047.56	7873.69	4460.05	21633.3	10777.5	35380.8	18377.4	37812.6	44958.7	9564.82	21493.5	29390.9	19564.4	10146.2	11657.8	44766.4	22307.3	42509.4	17972.1	9374.12	21006.4	5987.34	9864.96	18467.2	19346.2	10791	20242.3	11691.8	20022.4	27649.8	8710.96	4194.57	10012
3.42_642.3682m/z	65275.7	26296.9	50602.5	62517.5	100109	44868.5	38050.1	66920.3	45774.1	62688.1	35628.3	64187.9	33697.8	62634.5	36351.4	66668.9	62071.5	73838.7	41583.7	49800.5	35482.4	34322.7	41885.2	50515.3	60126.8	32943.7	53695.6	40186.4	5097.53	37047.5	71683.3	68523.8	44971.8	51792	22376.9	39115.5	35707.1	59204.9	80000.6	47679.2	60469.1	64152.1	40774.2	47675.1	69308	29682.1	63378.1	63803.2	38980.4
3.43_646.3806m/z	39598	25732.5	29744.1	30490.1	38623.6	41560.6	51283.3	15376.6	48379.1	32570.8	36638.7	15282.9	28342.9	37259.2	33993.9	39122.6	29424.1	32767.1	51645.4	38083.1	37405.4	34243.5	34684.1	40280.3	35768.8	37339.9	30259.7	38871.8	4470.42	37769.5	49915.6	38796.5	53783.7	38530.2	35208.9	13252.7	28671.3	37535.2	29604	27170.3	36657.3	33657.7	31881.5	30844.3	36856.7	12098.3	29379.3	34484.1	41184
3.44_466.4014n	13075	13401.1	3287.52	18252.4	29590	18084.9	41550	10009.5	26963.5	11674.7	9021.38	8835.91	6873.97	4155.7	23466.5	18075.2	5996.85	6473.07	7555.09	13774.2	12196.6	40346.2	20895	27894.5	35736.3	20687.7	12572.7	27482.1	22855.1	10403	5832.21	41174.6	36095.3	42412.2	60507.7	7065.09	30983.4	7718.83	1292.8	9714.19	12577	6283.15	14404	10097.8	15629.6	12669.3	2445.97	3844.09	10172.7
3.62_501.3947m/z	7469.9	2210.79	3160.51	13328.8	20747.2	8509.23	17275.8	8228.62	10430.6	4391.64	4318.07	5826.06	7122.49	2400.79	13084.9	11292.9	7341.84	3962.02	2892.84	4574.48	8057.36	29402.7	5226.76	18629.7	25242.5	5674.12	16874.1	9679.97	12471.1	7747.8	6147.62	22095.7	18544.8	22915.8	14917.1	6206.54	14241.8	2666.54	4141.69	3700.77	6134.14	4833.44	6871.89	7738.79	15954.4	16520.1	1794.9	2536.18	9155.97
4.30_79.9576m/z	266.526	192.388	277.28	208.713	369.429	391.794	1658.12	761.989	819.347	344.368	523.606	144.674	213.637	99.4722	152.137	196.908	197.61	105.749	413.907	325.178	171.145	483.156	262.68	373.437	117.673	885.665	362.88	422.189	461.676	366.758	171.948	115.825	311.872	534.223	1300.89	1000.21	823.456	214.035	467.263	155.009	225.262	77.1422	190.854	82.9958	71.2207	440.216	302.017	345.849	504.019
4.46_881.5178m/z	43507.3	35646.6	94720.4	266385	41752	40548.4	62677.6	30167.1	22505.4	55234.1	98160.6	66246.9	23329.8	43215.2	33058.4	33837.3	81672.7	39155.8	60304.9	55180.9	34159.3	84190.4	66632.6	14010.9	73926.8	53352.1	34686.6	11997.4	30695.2	57056.4	56485.3	145412	11657.1	36341.4	85415.8	22566	7638.96	46612.7	41479.5	21458.9	6778.74	36540.9	24200.6	61727.1	17129.8	10820.9	20959	17596.1	34330.1
4.48_824.5437m/z	16996.1	54689	127960	8678.14	12448.2	242214	168291	26262.7	85699.3	106239	66123.9	23427.8	239194	940.126	27181	41930.7	7525.16	200709	1186.45	53183.9	43784.6	88687	38700.8	97019.9	55406.6	24033.6	263105	74110.9	58268.8	102991	19378.5	63815.4	89016.6	146445	32151.3	5567.93	59755.9	26120.5	73742.4	38591.2	13625.8	50808.6	45313.4	80451.1	56907.9	37340.6	13530.5	2039.83	132408
4.71_798.5280m/z	12310.4	181256	59135.1	119523	14483	15291.1	69869.8	95059.2	22771.4	14744.7	140039	75818.4	32893.1	255023	14453.2	54766.7	655.949	9438.18	15399.4	82006.7	16587.4	19174.5	24193.5	13399.8	163672	99223.4	42471.4	136474	38337.1	43746.7	40899.3	35314.8	45378.3	92114.4	83723.5	9359.83	13710.1	214310	61424	48796.1	40762.5	170213	66502.1	65452.5	35318.8	1860.63	47124	15756	3761.66
4.73_1133.6926m/z	4086.51	342822	308042	50003.6	78372.3	25433.9	20929.5	17414.7	69127.5	204403	424500	43347	96009.4	26993.3	32357.1	35758.5	159922	150176	48866.1	34929.8	57416.8	73377.3	508665	320884	548160	173729	10211.3	2833.83	18421.7	25361.2	86223.8	144865	20594	3683.7	50229	333578	216874	185524	100244	230319	27649.4	9751.93	18291	65145.3	22329.6	220798	101043	20569.3	7698.01
4.74_857.5176m/z	404378	721861	707441	1.7254e+06	1.1318e+06	485525	587565	418443	270975	870656	1.43011e+06	870584	513470	845708	515644	506415	683945	575675	580607	720585	521572	636729	759819	334915	925476	683180	450551	481726	431290	678005	364355	413558	445837	965400	1.96751e+06	468945	241168	1.39624e+06	711965	674595	255298	832954	431599	710625	490416	246662	577947	387676	519320
4.78_874.5600m/z	9925.52	25268.8	73439.5	20487.7	16927.8	43966.6	41974.6	24459.1	20540.7	11513.4	58716.9	17517.6	26820.3	1697.05	7172.99	18292.3	10024.3	13308.8	8924.07	25695.7	22889	24605.2	11448.1	14178.3	16684.1	34577.3	30782.1	12195.9	17691	38528.4	41327.3	44903.3	18503.3	27762.5	15660.5	16206.4	4758.12	18120.2	9892.76	15300.3	6379.47	16334.9	21904.9	13303.9	15463.9	15472.9	10567.8	1139.75	10922.9
4.80_242.9445m/z	321.531	88.4368	67.8766	117.314	156.991	199.942	357.369	336.004	262.609	566.551	143.496	1067.67	263.349	555.319	572.184	269.66	452.023	43.2167	122.15	249.882	684.732	1745.29	778.807	1248.3	520.285	139.795	209.775	243.154	112.194	107.781	296.383	234.817	168.005	220.971	714.693	452.453	1238.31	185.821	239.716	205.404	296.909	320.509	631.379	220.003	142.266	105.138	85.503	286.821	85.8842
4.84_507.3692m/z	4924.75	6486.57	7881.11	7576.95	9391.97	3582.04	8657.93	5864.77	10646.7	11150.3	9513.98	4306.3	4843.75	8035.8	10314.6	6480.63	4724.35	8630.08	8535.47	5229.22	13494.8	19243.7	8263	7729.25	7719.72	6514.56	2198.17	9440.87	21714.7	12847.4	6081.16	6866.45	6984.03	5463.56	8015.6	4479.64	5288.04	5876.81	6093.97	7215.78	5309.66	10033.3	4486.11	5588.74	3389.05	10678.1	11505.9	2802.24	7884.32
4.84_874.5598m/z	16645.2	29842.4	61999	37006.8	7965.48	18973.5	18253.3	9663.39	11460.9	7926.74	43850.7	12276.7	19087.2	13206	11349.8	25485.2	4208.52	15758	6815.71	13258	38672.7	14972.7	13426.5	6943.49	15639.9	9002.32	13644.3	43551.9	10436	46895	15148.9	17832.4	3896.31	14686.3	28280.4	16549.8	3410.44	87872.9	7192.43	10154	2582.32	29364.2	60174.1	10589.5	24347.2	10356.7	24451.2	3127.82	6507.04
4.86_883.5334m/z	34857.8	65375.4	128180	208890	96128.1	64664.7	88600.4	30334.7	32597.4	131817	224410	144086	265211	73207.1	99364.3	82265.3	40672.3	140695	58443.9	108349	139679	138139	84660.4	50421.6	113026	32296	129334	68621.7	47991.7	144739	23899.2	112255	22188.5	90170.3	290500	52905.6	16231	97988.4	60067.2	68753	36147.8	165458	94184.1	153274	117972	56771.6	66255.8	16259.8	71630.9
4.90_714.5070m/z	2348.22	46845.3	17893.2	11746.5	427.564	20848.1	23464.3	29252.2	8687.3	9863.67	40944	11545.9	5867.85	16845.6	6318.42	12449.5	2449.96	3195.75	2683.78	26107.2	3128.75	7167.8	2648.02	2252.9	27038.3	37434.1	18334.6	45721.1	28905.4	11351.1	6789.27	7264.22	12252.1	65434.7	3796.8	4055.13	8235.38	31961.4	23232.1	19702.8	472.682	19446.1	7109.77	15889.5	6894.82	8011.88	10169.7	11917.4	4458.95
4.90_774.5281m/z	180835	874857	440188	379957	139427	444192	480758	711517	313952	310249	646653	520081	309807	604702	230487	453809	145006	198529	239770	553321	167166	315843	228381	254074	821084	808582	538429	583991	406940	256945	326315	312360	439791	924319	278119	159721	278821	627383	599723	498291	74953	654334	317319	464690	298188	102562	344384	177480	173334
4.91_833.5176m/z	436864	812538	913136	1.93364e+06	986536	931234	960116	552638	358999	983073	1.29328e+06	1.21086e+06	495457	956904	682346	721562	905522	711997	541917	900038	482112	843451	685530	587887	1.36217e+06	1.03695e+06	868633	437333	452310	746185	570395	1.05353e+06	661758	1.3242e+06	1.75965e+06	503763	538212	914809	770789	909030	311011	821458	469656	1.60089e+06	603859	391780	485138	562028	712930
5.05_859.5331m/z	41951.7	52102.3	214213	146871	145886	271799	238994	95208.3	102204	233838	206434	146355	416182	72956.2	79569.6	144389	93285.6	239354	41819.2	137998	207517	208313	113906	138986	95997	80199.8	279444	117977	77520.9	200838	35727.8	216728	82393.8	194620	200359	82581.7	87566.3	88339.1	78528.6	108961	104973	165029	114888	205907	208739	182212	61372.1	47928.7	225065
5.11_790.5379m/z	37807.3	81605.8	70304.8	58865.1	18032	66752.2	57906.5	47003	38030.1	51663.6	91637.3	35849.2	65770	32545.6	53606.4	56973.6	21013.2	60896.4	17319.2	36847.7	90363.7	60503.8	70391.4	38320.1	63240.4	34933.1	59404.2	92055.7	49994.4	87142.3	21977.3	57501.6	27432.7	80650.4	54958.5	54131.1	18063.3	89587.1	47872.2	54388	20417.6	79050.9	90579.7	59742.5	54168.4	30786.8	69911.8	16403.7	31467.4
5.11_850.5594m/z	773119	1.44769e+06	1.18653e+06	863036	545332	966847	1.09373e+06	856333	918922	856310	1.53549e+06	769532	1.11741e+06	865172	1.00193e+06	1.15735e+06	549392	1.13849e+06	606265	822203	1.49631e+06	1.08677e+06	1.06575e+06	812938	1.13818e+06	851111	1.02207e+06	1.68473e+06	784194	1.32659e+06	687165	1.12154e+06	789095	1.1504e+06	1.13125e+06	1.06412e+06	535604	1.49676e+06	928183	988304	636843	1.26106e+06	1.52825e+06	1.0786e+06	1.08287e+06	756061	1.17238e+06	568828	758831
5.24_859.5333m/z	16347.8	50219.1	53518	149208	73092.2	65246.4	64957.3	32917.3	9128.54	148490	168486	44989.5	71821.8	67474.8	46456.4	31654	34356.9	44437.1	26350	79529.4	33419.4	64031	70439	32660.4	69968.1	53358.7	47471	50966.1	20670.8	38629.9	17369.4	25433.3	22045.1	153257	175131	24022.2	17820.1	89250.2	21611.6	93919.7	18228.4	44783.4	16672.9	67509.6	15152.4	40275.9	32064	37583.7	13926.5
5.31_962.5351m/z	8600.18	14024.4	16902.1	9913.13	11123.9	34983.9	25513.9	18527.9	26223.5	26270.9	43398.1	13807.2	20145.1	8966.47	9425.84	16242.8	9092.66	30359.4	9207.47	21537.8	33303.5	23405.6	19170.2	21801.6	15127.2	24144.8	25294.1	32121.3	11535.6	33502.6	8509.59	13116.2	16868.4	26232.1	18256.6	9124.57	19442.6	18032.7	11921.6	23111.6	21684.5	20604.1	24230.8	16566.2	29547.2	19995.1	9368.03	5237.61	24965
5.32_1092.4924m/z	3066.29	5677.02	12404.5	4604.76	6676.8	15148.5	14630.5	11584.3	11856.2	18720.9	14365.5	7637.74	11805.7	4513.79	4435.07	8302.42	3128.71	11729.1	1222.23	5886.16	14397.8	15389.5	10932.7	7898.15	6589.14	8589.87	10797.4	13854.4	4877.08	15396.6	6699.35	8814.45	5875.56	17303.6	10540.6	7541.39	8236.77	9750.9	4526.33	9722.06	5324.5	8364	6260.54	8643.83	11974.9	7596.41	3830.91	1748.02	9300.75
5.32_766.5382m/z	126550	294945	311144	172384	258113	681348	405687	321625	369698	473314	632966	357895	372207	179165	194458	367804	195555	472959	142465	343354	461156	400641	364491	439224	278622	380464	540052	505944	249573	486347	240515	262883	322117	542774	307152	263835	306176	300874	242335	350649	336782	285838	310148	337016	438863	299481	236274	117191	397371
5.32_826.5596m/z	2.30565e+06	4.30746e+06	4.45456e+06	2.53748e+06	3.81331e+06	8.89921e+06	5.78585e+06	4.65598e+06	5.13054e+06	6.49607e+06	8.19127e+06	5.24617e+06	5.58731e+06	2.91844e+06	3.16103e+06	5.15577e+06	2.88925e+06	6.24554e+06	2.36091e+06	4.92858e+06	5.85549e+06	5.52168e+06	4.79605e+06	5.8971e+06	4.0051e+06	5.19297e+06	7.10971e+06	6.68395e+06	3.66003e+06	6.17472e+06	3.55139e+06	3.88226e+06	4.50477e+06	7.22735e+06	4.5732e+06	3.96434e+06	4.52516e+06	4.47433e+06	3.89317e+06	5.10284e+06	4.85453e+06	4.2224e+06	4.47521e+06	5.04594e+06	6.07431e+06	4.4096e+06	3.53394e+06	1.93631e+06	5.53481e+06
5.32_894.5472m/z	15114.9	78122.7	88533.6	37981.7	63023.3	169508	110108	76925	99062.8	114162	151463	80483.7	93161.3	28365.4	45256.4	89398.6	31232	118670	22405.6	72146.7	107118	80525	74889.4	84023.3	61566.6	78350.2	122232	122994	61506.5	121132	46530.6	73399.3	83161.1	146647	75715.3	59115.3	74310	70493.6	51785	82566.9	68357.5	68130.4	72448.3	67129.7	84784.1	55533.3	44194.3	13391.3	92798.3
5.33_956.5174m/z	4316.32	13620	14887.3	9615.11	15654.4	58697.3	31519.2	11737.7	21980.6	41975.2	58238.8	23019.6	27120.7	7308.24	10032.7	25940.4	10284.7	40271.9	10064.2	23005.1	47739.2	30341.1	17895.8	24559.2	19997.5	20851.3	38265.7	44251.7	7044.5	47991.3	5197.67	12675.2	15819.5	48307.8	15658.9	9897.12	15648.6	13972	11084.6	26864.2	28390.4	21415.2	27812.5	18146.8	36268.7	22677.9	11079.9	1761.78	25307.6
5.35_812.5437m/z	12437.3	47954.8	80874.2	60622	3192.58	9309.34	31614.4	22597.9	3990.1	24097	74987.6	13776.2	8978.14	91781.8	24353.2	23988.4	5802.32	3890.82	16077.6	21615.7	29841.9	20951.3	58712.4	11176.4	87107.5	15199.4	12437.9	58530	37014.6	48686	23507.4	18800.6	15552.2	13070.6	44340	51091.5	3685.18	70059.5	17883.8	35784.3	3203.68	81289.4	73175.5	33887	20533.1	10465.6	40110.7	25060.7	23921.8
5.53_800.5438m/z	88219.3	591207	268624	1.30489e+06	856842	309296	428360	278913	166520	317419	942140	762481	301260	375414	267146	365413	144061	158504	264096	714283	148696	225754	279070	220087	891646	659943	348096	632497	341205	278144	203159	259821	185116	593546	1.79925e+06	151824	245162	1.46131e+06	474211	489462	76814.7	626088	391714	925645	310950	126744	219383	120655	145295
5.57_788.5437m/z	101576	263530	332129	171219	64206.2	276331	253608	260966	169331	402499	481493	151414	175652	347330	158849	201328	178499	138147	161597	195299	186774	223195	283004	209949	410065	258582	222050	301435	301043	244333	269209	219284	215121	255591	185308	314883	221711	244232	229695	378211	197809	309757	238766	307256	150630	224355	218806	190240	251994
5.70_737.5358m/z	45729.6	56530.9	81991.3	78299.9	74855.5	119175	73963.5	75413.7	79959.3	119035	92196.8	65722.8	70577.7	68706.1	62389.1	75558.7	94376.1	100644	66136.1	81520.3	91055.6	91839	84445.7	78587.2	60977.9	71250.8	101080	84428.6	85579.7	103778	59562.2	72465.2	42675.8	105026	90877.1	66901.9	69374.9	83179.2	49258.3	89733.3	79562.6	103735	73262.6	103979	74036.4	70934.1	89006	70124.5	81291.5
5.70_786.5766m/z	3314.97	2272.08	9047.08	4887.48	7843.62	8924.68	6282.09	1787.63	708.02	10635.7	9256.98	6515.05	4547.64	7743.62	5986.12	6923.47	9925.07	5566.27	7851.89	2108.92	9427.48	4395.25	10578.9	4777.8	3769.25	2795.93	3334.93	3183.33	5398.18	6953.17	4059.85	7662.98	1681.18	5194.64	5354.86	11484	4509.11	5752.24	5179.55	13721.9	2890.91	7784.99	4436.32	11247.8	3232.55	6987.33	12165.9	6202.18	9852.5
5.73_815.5525m/z	296842	291912	316707	258544	308077	387870	324533	308649	340150	368668	325262	320860	335600	360054	349422	332314	362985	344791	323733	298073	323998	293625	321802	319488	279138	292931	311620	318744	307104	336717	346885	334703	267635	327916	332006	389692	294133	286894	278406	319059	368412	321034	328130	351956	319334	387717	351468	327960	344671
5.73_877.5237m/z	168685	157016	177217	136938	155827	187849	173766	150718	171028	175600	176858	165792	189052	181047	190045	168400	179668	167474	172463	148056	146991	158391	162716	152511	142593	144379	173910	167287	164530	154531	187325	189869	148375	173260	167997	192833	160268	148301	144343	155226	185803	162160	181612	166551	171261	177210	167897	156023	158076
5.74_687.5436m/z	1.80109e+06	1.67983e+06	2.05958e+06	1.8339e+06	1.64412e+06	2.45225e+06	1.76486e+06	1.9035e+06	1.95624e+06	1.92811e+06	1.86885e+06	1.76692e+06	1.79636e+06	1.99518e+06	1.96091e+06	1.83748e+06	2.24209e+06	1.87779e+06	1.75459e+06	1.5376e+06	1.95591e+06	1.74733e+06	1.99493e+06	1.84208e+06	1.69754e+06	1.69264e+06	1.79862e+06	1.83704e+06	1.87083e+06	2.24209e+06	1.96281e+06	2.0027e+06	1.55666e+06	1.86538e+06	1.66227e+06	2.29034e+06	1.67348e+06	1.74643e+06	1.48985e+06	1.69908e+06	1.93354e+06	1.82696e+06	1.78887e+06	1.98699e+06	1.85849e+06	1.88236e+06	1.86546e+06	1.92255e+06	1.82413e+06
5.74_747.5651m/z	8.81412e+06	8.39771e+06	9.90175e+06	8.67604e+06	8.18991e+06	1.16998e+07	8.51078e+06	9.29644e+06	9.51006e+06	9.26822e+06	9.04496e+06	8.91799e+06	8.88472e+06	9.80281e+06	9.61621e+06	9.05928e+06	1.0722e+07	9.17147e+06	8.75783e+06	7.59401e+06	9.34095e+06	8.58587e+06	9.54844e+06	8.92088e+06	8.30863e+06	8.27713e+06	8.67451e+06	8.87598e+06	9.08734e+06	1.04805e+07	9.77302e+06	9.65374e+06	7.95402e+06	9.02045e+06	8.21116e+06	1.10071e+07	8.1732e+06	8.64265e+06	7.64291e+06	8.29367e+06	9.51992e+06	8.79299e+06	8.85649e+06	9.68997e+06	9.22491e+06	9.38267e+06	9.10245e+06	9.30407e+06	9.00487e+06
5.74_945.5111m/z	88718.5	85982.6	78311.1	62879.6	85852.7	84614.8	88455.1	77686.1	101832	100979	79752.2	88336.2	91221.3	91182.3	76716.5	81167	94374.2	85360.5	85743.7	71221.1	69848.3	78886.9	82402.7	76243.3	69045.4	95670	102181	87681.1	82460.7	81334.2	86474.1	91376.7	71139.7	84944.5	87230	100115	83436.1	86065	78586.9	74364.2	108182	83252.2	81365.3	78298.1	82440.6	85344.1	85438	87029.3	81166.7
5.77_748.6505m/z	29020.1	21884.2	18883.8	20835.8	24290.7	23715.2	18587.5	24876.1	26270.4	18681	18392.1	18991.3	22656.8	18983.3	18014.9	21874	31785.1	21632	18822.4	16923.7	26706.8	28535.9	24118.8	25515.9	15765.3	21212.7	23709.1	11877.9	17438.8	18308.8	19972.8	21621.8	16896.5	17606	16996.5	23837.7	16889.8	22769.7	17198.3	17566.5	20814.3	28275.4	23005	19887.4	19586.8	25742.9	20311.3	18197	18090.9
5.81_876.5750m/z	257836	221207	379499	235889	176676	235898	317635	244036	212224	217303	305139	231272	523356	209822	280153	197147	232251	221577	276860	327982	245606	334403	223941	198695	216035	148583	316571	166710	271082	233634	256385	450257	133238	341047	299044	304839	122889	242078	297851	216083	259088	272667	353344	236883	227499	232880	238793	139430	146127
5.81_945.6185m/z	5397.53	1597.17	5172.67	6264.6	5594.02	3404.11	3253.24	2214.77	5106.36	4153.13	3536.86	1424.42	3569.74	3412.59	3219.87	2471.51	8075.94	3315.18	7183.68	2771.12	3905.84	2761.09	6470.41	2766.37	3286.21	4910.26	5861.02	2269.45	3414.17	6758.84	4829.47	4655.9	1229.45	3196.3	3490.34	5771.92	5992.65	1287.89	5815.27	3272.27	4985.12	6067.75	3541.25	4897.34	2110.88	1681.62	2601.93	5917.93	5250.86
5.95_835.5332m/z	275239	383445	376776	1.00894e+06	875379	493210	370317	219365	272244	447465	888251	688463	342835	348439	215134	435430	284341	464320	300490	521305	378252	309763	442321	306783	462841	712352	287718	288616	219581	515479	290872	349407	299211	357315	779609	261916	177957	645688	280066	340000	209079	485119	255088	647678	331214	237047	315790	271309	282569
6.08_1667.0864m/z	349706	236738	527908	357361	156656	119178	257874	136545	66160.4	335205	241284	123002	188962	303979	234667	201668	274391	214808	200652	147702	325961	229038	247181	91733.8	254967	97672.2	97541.9	109858	202055	386398	185595	314886	97570.1	306281	166344	257398	27852.1	353898	272388	219116	80803.8	471494	266439	169321	209610	81365.6	373249	108523	227836
6.09_885.5490m/z	5.04774e+06	4.27835e+06	5.98986e+06	4.09048e+06	5.0362e+06	3.66105e+06	5.15171e+06	4.04477e+06	2.81339e+06	7.37141e+06	4.53842e+06	4.56091e+06	4.68332e+06	5.22283e+06	4.16368e+06	4.33101e+06	6.12919e+06	4.38317e+06	4.26257e+06	4.21929e+06	4.21099e+06	4.52001e+06	4.47312e+06	3.89424e+06	4.46219e+06	3.61941e+06	4.04462e+06	2.70846e+06	3.97662e+06	5.13861e+06	4.00636e+06	4.78486e+06	3.64291e+06	6.2957e+06	4.16299e+06	4.9894e+06	2.84937e+06	4.82274e+06	6.53183e+06	5.03698e+06	4.83013e+06	6.01149e+06	4.1833e+06	4.22891e+06	4.22802e+06	3726180	5.70321e+06	3.31535e+06	5.02615e+06
6.10_861.5490m/z	24333.5	23882.4	54949.6	55368.6	94016.6	66440.1	32873.2	13334.5	43314.8	70182.8	113223	92391.1	213047	4357.3	7604.83	51758.9	15324.6	70265.8	19605.6	56314.6	108645	23223	53157.1	22458	12529.4	59201.7	27663.7	14890	24557.5	92005.5	11028.6	29472	12698.4	13151.9	39012.6	30854.1	8719.63	36185.8	19648.7	22093.9	36462.5	40384.8	13917.4	35708.6	39876.8	53878.3	14731.7	16048.7	38057.2
6.10_953.5348m/z	33154.7	28492.8	26550.3	17292.1	45948.1	20111.5	39525.2	32411.4	28837.1	64253.5	26129.6	43840.5	37328.4	39168.2	30340.3	40214.9	72823.7	35673.6	28186.6	30774.7	24759.2	27820.7	37020.7	42273.4	26874.9	25737.5	50435.8	16172.7	24575.8	29266.4	27906.3	33907.5	23285.8	47142.4	26134.7	28422.1	25067.4	24553.3	48036.1	50396.3	52017.2	32918.3	22178.8	32895	24161.4	34583.1	42610	22348.8	46862.2
6.11_1015.5031m/z	33206.2	24107.7	24279.9	12288.5	21920.7	28077.3	32536.5	28604.9	18881	37712.9	23077.6	29263	30638.5	32230.3	20688.3	23496.4	35301.7	21188.1	25052.3	18461.4	16682.8	18588.2	21491.8	22175.2	28230.9	14136.6	22369.1	19464.6	15193.7	15374.2	23643.7	18364.5	27085.6	26776.4	21821.3	26882.6	18453	17796.2	34218	23360.1	35168.9	17495.5	19019.2	21561.4	22636.5	31406.6	27837.4	14149.2	34127.8
6.12_1083.4891m/z	4288.25	12785.4	7336.91	4541.5	17356.1	7834.01	14594.7	15064.5	13280.8	15708.5	8752.35	13475	12621.8	13842.5	7624.07	12674.2	17541.4	17071.8	12546.3	13931.1	10084.5	14303.8	9487.92	14442.9	14816.7	15283.9	13978.4	7024.23	10343.4	8298.09	8012.03	10853.9	14242.2	10199.7	14050.8	13061.5	11844.4	8525	14287.1	10744.1	21313	5635.07	7527.78	9922.71	9561.83	16702.9	12005.1	13834.9	14837.2
6.22_920.5633m/z	7111.75	11541.9	23226	16550.6	6141.8	10545.3	16312.5	13539.1	9398.19	14937.7	14529.4	4154.21	35572	33285.5	22014.2	16137.3	11981.9	16155.5	12747.7	9124.76	26487.3	19130	19249.1	6436.66	17249.1	6333.42	8839.57	17893.2	14833.3	22078.1	7196.03	20537.2	7164.34	16641.3	10022.1	11840.3	2207.34	18319	11924	14512.7	7711.16	31188.7	34641.7	6205.31	20260.8	11380.5	22972.8	6738.46	5999.6
6.30_861.5486m/z	937259	1.00948e+06	1.40035e+06	1.3778e+06	1.173e+06	1.21713e+06	1.73847e+06	1.01598e+06	732637	1.45937e+06	1.06706e+06	1.40915e+06	1.11902e+06	1.2651e+06	1.02244e+06	1.00676e+06	1.43676e+06	1.05792e+06	775942	1.16576e+06	835005	1.2733e+06	976872	1.05206e+06	1.59392e+06	1.2046e+06	1.45426e+06	684825	745176	1.10004e+06	997401	2.28882e+06	1.07705e+06	1.56913e+06	1.33287e+06	1.00609e+06	912760	907178	1.23323e+06	1.14223e+06	863590	1.18284e+06	967847	1.81983e+06	920111	1.04082e+06	794680	996324	1.19309e+06
6.32_1560.1083m/z	5.60028e+06	7.23642e+06	8.32534e+06	5.87313e+06	5.43393e+06	1.19184e+07	7.43573e+06	6.89625e+06	6.90927e+06	9.70833e+06	9.2957e+06	5.98996e+06	6.04334e+06	6.23837e+06	7.24761e+06	7.37285e+06	7.51897e+06	7.15595e+06	5.91977e+06	6.93868e+06	7.7995e+06	7.93684e+06	6.84211e+06	7.61483e+06	7.96898e+06	8.45832e+06	8.00143e+06	6.62486e+06	8.24637e+06	7.83838e+06	6.98823e+06	7.84696e+06	6.4029e+06	9.79719e+06	5.4236e+06	7.76733e+06	7.64996e+06	8.80905e+06	7.5528e+06	8.25166e+06	8.03212e+06	8.73673e+06	7.00279e+06	7.56611e+06	8.04428e+06	5.09183e+06	7.42299e+06	4.87778e+06	7.92968e+06
6.32_788.3682m/z	12004.4	20836.3	24539.4	17010	11650.2	32204	24068.7	21883.5	16598	31016.3	27633.7	15675.8	16643.4	15229.2	19409.5	23316.3	22982.2	24790.2	18351.1	22770.3	22006.4	20942.6	22272.5	22043.7	28492.4	24798.7	24774.7	14594.6	23224.8	24660.2	18021.4	29747.9	20602.4	25646	16175.8	19671.8	23212.8	29549	17653.5	22241.9	25430.3	26135.1	26642.9	19666	25496.7	15055.5	22017.7	15377.6	24088.6
6.32_802.6941m/z	115417	142105	149064	103068	90018.3	181378	121152	106112	105644	153338	139001	102911	99956.6	106200	111413	114353	124511	116555	97177.3	109974	113725	129575	109711	114456	127407	131218	123106	95457.7	120193	111382	100106	132719	107455	155159	80926	109872	127003	135443	116503	112468	125898	124746	116494	120109	134633	95062.1	116419	76924.2	120654
6.32_802.8190m/z	1.05812e+06	1.44894e+06	1.63254e+06	1.12007e+06	1.00944e+06	2.04496e+06	1.37084e+06	1.24156e+06	1.27467e+06	1.67271e+06	1.58093e+06	1.06983e+06	1.09231e+06	1.09741e+06	1.23472e+06	1.26163e+06	1.3599e+06	1.30673e+06	1.1143e+06	1.26041e+06	1.32665e+06	1.42325e+06	1.20868e+06	1.34441e+06	1.37197e+06	1.48096e+06	1.35522e+06	1.14267e+06	1.37544e+06	1.31065e+06	1.30293e+06	1.57257e+06	1.19757e+06	1.72244e+06	926656	1.38746e+06	1.40451e+06	1.53998e+06	1.38295e+06	1.41808e+06	1.40994e+06	1.43135e+06	1.23672e+06	1.31275e+06	1.45021e+06	964077	1.3529e+06	889252	1.42875e+06
6.32_802.9335m/z	69810.5	146789	302417	172005	57967	541809	174380	132683	130712	316388	290932	63513	89560.7	83264.1	135312	159267	173348	166468	95251.3	144141	265209	210663	152204	158580	173327	186109	166270	109026	202265	234434	121010	219411	82263.7	345907	57896	164616	181749	238440	130810	209611	154173	241009	144997	156851	178342	56021.9	155826	62808.7	202230
6.33_803.0067m/z	344454	605336	758264	505462	344616	929851	550264	473295	471416	693251	652879	354976	388107	387345	468480	485436	526454	503325	396955	468184	520182	553050	465144	517537	541664	579958	524483	425647	550894	534508	506640	711471	424257	768647	314484	534453	543448	624847	510202	570062	535339	581194	459311	500175	557118	311239	506487	308308	548011
6.33_803.0714m/z	496920	766052	891518	622933	507378	1.18727e+06	720319	641017	636827	937596	899716	528386	546977	556843	650647	649734	718998	692434	549096	642656	736046	765928	637091	717452	744426	798608	726643	586489	762051	748299	684010	858793	605216	981327	468938	721539	722520	827292	699851	780325	732821	804471	637841	685729	770278	457510	694699	455422	763682
6.33_841.5710m/z	11125.7	2593.59	6605.79	4483.52	5265.6	10632.4	9546.09	9389.01	5932.86	8437.66	4837.45	4903.19	8544.69	4618.29	3428.79	4325.15	2941.97	5783.93	2826.73	2258.59	7208.38	6982.44	5470.83	5669.07	8780.2	8614.79	6716.97	7359.72	9134.91	6742.73	2191.22	8025.46	4373.32	5495.81	2638.43	8298.79	8418.36	3920.2	3160.77	4455.74	10743.8	6379.8	5620.39	5235.63	5073	7314.88	5468.19	6019.58	2430.54
6.40_1586.1218m/z	2930.95	14800.7	29896	12121.9	9316.9	146199	18461.6	12930	5933.14	43592.8	34052.9	7744.58	65714.6	5772.47	10861.8	10187.5	19692.2	74002	34477	27854.6	98789.9	53624.1	12606.2	27517.6	9792.32	3628.37	11398.5	9884.13	8732.51	24316.2	14139.4	22055.1	10991.7	42150.3	16283	22198.4	22313	6375.37	6500.66	13844.6	12928.5	65253.1	46155.9	22705.1	36381	24216.6	57785.9	5978.86	64826.1
6.44_878.5911m/z	24183.8	15529.8	42833.1	24775.8	3536.16	17884.2	42759.5	12099.3	9211.2	15626.1	22261.3	2616.64	33300.6	42185.7	25863.8	16615.9	10684.3	14023.2	6372.02	6894.59	18376	39347.8	9488.79	9465.26	15885.3	2151.86	8698.09	10042.8	11017	16887.7	10318.5	61399.4	8138.9	25621.2	23971.3	21404.7	8012.79	11157.3	9612.85	15927.5	11191.8	23357.9	43670.4	12914.4	14988.5	9153.49	17890.2	9637.21	12151.9
6.48_1026.5208m/z	20017.2	29057.8	31803.2	18405.9	27584.8	58439.2	46552.5	28697.7	34948.8	35670.9	36706.3	37358.7	79119.9	21502.8	40110.5	32930.6	25624.3	54506.4	27446.3	36356.5	46848.4	42429.6	30664.6	37609.8	21893.1	13084.5	46447	37169.8	32641.9	46020.8	29619	43553.8	17766.7	49327.2	32517.6	35264	29352.7	32209.9	27362.3	33543.2	57897.5	34987.1	32283.9	27004	33223.7	35666	27295.9	13673.6	39261
6.48_768.5537m/z	477661	575837	836554	472552	548991	1.26066e+06	884149	707909	738959	907748	865832	721429	1.52023e+06	597747	715739	742978	522558	966591	527181	763382	963156	933437	682800	780809	611292	621379	1.02526e+06	745609	719026	789968	576359	824704	578900	956385	626541	795434	703503	672966	654954	785829	972122	773801	848107	671800	870974	761103	611114	379552	830396
6.48_828.5754m/z	6.20203e+06	7.31056e+06	9.78193e+06	5.86816e+06	7.08987e+06	1.47391e+07	1.06023e+07	8.96016e+06	9.28494e+06	1.0875e+07	1.03345e+07	9.04211e+06	1.7392e+07	8.18802e+06	9.05235e+06	9.16505e+06	6.48797e+06	1.10864e+07	6.75345e+06	9.30816e+06	1.11001e+07	1.10009e+07	8.2911e+06	9.45589e+06	7.61822e+06	8.07289e+06	1.2388e+07	9.36178e+06	8.84879e+06	9.06765e+06	7.45964e+06	9.87081e+06	7.39114e+06	1.14019e+07	7.96303e+06	1.01106e+07	8.83934e+06	8.54378e+06	8.32115e+06	9.65158e+06	1.21132e+07	9.77752e+06	1.04036e+07	8.73549e+06	1.04103e+07	9.24364e+06	7.65866e+06	5.14897e+06	9.82054e+06
6.48_896.5629m/z	102677	124633	190855	112563	133560	291592	218821	172786	170779	212296	199018	172997	350462	148420	172507	188488	124685	247505	138927	190470	226184	208303	159689	170593	137008	133761	237091	185160	166743	190814	152913	205519	128306	224568	142553	201610	166373	166944	156755	172621	242842	198035	195389	170504	198897	208623	145849	83708.4	198177
6.48_964.5502m/z	12543.5	24625.5	32427.1	26138.3	26673.6	60378.2	46015.1	31587.8	36166.6	30368.3	35242.4	37604.2	57251.4	18354.5	34878.2	25685.5	18285.8	41292.6	21208.1	31881.9	37342	36557.6	25945.3	35787.8	21981.2	25222.4	56770.8	36167.4	37592	41094.5	18979.6	38348.8	29452	44135.1	23457.1	32755.8	31634.2	27894.3	25773.1	18412.2	41179.4	28652	29177.6	20233	23464.5	26655.3	19458.9	13819.7	32977.6
6.49_1094.5079m/z	15292.4	14505.5	16659.9	12184.5	20571.1	21742.3	17399.7	20937	16646.8	26942.5	20870.2	22690.2	28894.4	17938	20587	12199.7	16139.3	24868.6	14744.5	19112.4	23335.2	26135	20577.3	28049.4	22269.3	29801	33243.1	28160.7	19104.8	20790.9	15244.8	20947.7	16848.6	18596.9	11223.5	19607.5	27349.8	16539.3	18898.9	16104.4	30362.1	22732.7	18842.8	10390	28296.1	10767	10828.6	7446.06	21297.8
6.49_1162.4949m/z	5106.36	9198.88	5399.06	4138.71	6184.59	8355.96	6131.94	11894.2	16608.4	30068.5	14200.7	13025.4	17090.8	8643.35	7365.38	5354.66	6517.93	8653.34	3432.88	9289.05	5811.78	9999.25	11387.6	10355.7	8405.96	7367.93	13432.4	12259.2	8925.17	5219.98	6620.04	10367.6	8871.47	9063.29	3640.16	15361.1	15226.6	16309.7	8384.79	10538.9	17293.4	6293.09	3252.75	5728.75	6968.89	9135.03	4756.93	4967	7979.65
6.49_818.5493m/z	11832.4	12731.6	20962.7	7924.33	7071.21	12854.2	12348.7	16099.1	17004.8	13092.8	13520.4	13458.9	32641.7	13367.3	18431.1	12835.4	6748.56	13468.2	8779.43	10462	21589.2	20231.8	15638.4	9338.3	11170.4	5573.2	16207.7	8862.91	10934.1	17745	6698.86	25380.1	4552.67	14400.7	19146.3	19386.7	7573.39	9020.24	17134.1	14481.1	13976.5	12976.1	19014.5	14448	16236.1	13118.1	10405.7	8241.98	10731.6
6.49_958.5333m/z	30630.6	57838.7	86849.2	39220.5	45845.7	129854	87087.7	58042.4	62166.5	90002.5	75374.2	63254.5	156496	51851.9	66234.5	71452.2	35580.7	89242.9	33093.4	67617	98077.5	77325.1	60514.7	52786.8	37462.5	44221.3	91285.3	56381.1	59871	72086.4	50295.9	73609.7	52024.5	101498	61116.7	75810.4	60097.4	55864.6	45748.5	63343.9	90694.5	72783.6	74461.2	61423.4	73044.8	81849.3	49038.8	17105.6	73382.8
6.50_1032.5370m/z	4517.6	2514.04	5155.08	3293.6	4184.67	8415.6	8988.22	5900.91	11434.6	16423.1	13406.1	12330.6	17726.6	4332.56	7564.36	7194.36	3605.37	6409.79	6923.3	19008.1	11615.7	12172.6	10525.3	6384.08	4203.76	7221.95	10451.1	10405.7	5681.04	6790.9	4852.37	5834.64	1554.92	4483.64	5343.39	9463.79	6449.49	8806.02	6928.98	17393.5	9179.13	6949.47	5256.47	7308.01	9198.52	7198.22	8481.49	3251.26	12926.3
6.50_738.5069m/z	239356	197012	265778	487345	424659	34348.4	222428	210606	66428.2	286496	222633	188084	46500	164103	94612.2	254872	243493	193306	294269	173157	190964	161134	122552	62476.4	377530	185802	143088	181935	394887	220930	191429	567637	89104.2	241807	256635	86744.6	55761	629596	216625	138826	117690	434405	246696	105274	202472	82610.8	262321	94534.6	190048
6.54_553.4947m/z	391029	234262	326629	262174	332581	503078	458397	332662	443514	378302	309313	156360	347152	433965	773564	947663	1.18369e+06	1.28204e+06	1.01853e+06	472802	369258	340799	332389	244814	496744	375024	504193	480008	482365	343194	230203	260935	351923	480716	297346	445263	353556	330093	230966	163569	285207	426302	914540	1.88711e+06	1.16525e+06	1.22623e+06	501835	595039	630045
6.65_764.5274m/z	86102.8	95413.1	178166	186486	112921	42809.5	123040	106512	41333.1	165954	154945	63416.4	78513.5	127603	48120.8	135195	79726.7	109039	86800.8	91487.1	127897	117667	78737.9	45719.1	139887	53085.9	95881	112284	164738	113291	69308	318955	38857.9	143868	148103	63522.5	27000.3	246693	61030.1	86018.6	68904.4	212870	186942	74363.6	88985.8	47649.4	115588	46221.4	75123.5
6.72_887.5641m/z	502261	417709	405523	415920	391916	414031	548233	231928	191247	819045	621483	445446	612119	403686	339946	390368	460917	370116	292457	560567	359634	576410	327131	405540	365348	368020	487681	355274	299825	365283	291999	398203	255726	951256	407241	298901	296733	524743	480212	745252	453291	497135	359587	349832	262896	282829	563447	317453	301666
6.77_714.5070m/z	106569	162214	174309	356853	541723	71205	175640	177400	56757.6	305319	247657	275560	32339.4	86050.5	43916.2	186381	229217	155429	176325	256191	129670	124059	70252.5	74493.2	325495	227972	200223	109547	264649	117425	108667	344582	111628	347583	310075	46433.5	71581.3	448402	158190	166405	156098	356313	113054	105348	129614	59625.3	134167	51744.9	159776
6.79_790.5593m/z	139285	212461	218394	327692	168405	157634	135561	120547	70273.1	259515	420567	138981	163351	321037	177066	173315	99551.9	70951.8	187968	196206	142117	146314	284938	83450.3	234527	185803	83637.8	153435	206996	162102	117113	174726	57021.8	195488	450139	312059	65414.1	387851	117305	345470	99886.8	256269	162328	291818	86935.8	129964	203352	102300	99237.6
6.94_740.5227m/z	26023.8	38528.7	97342.5	87556.5	142279	45074	128860	76963.3	36738.9	180838	157351	78674.9	81082.7	14792.6	7050.48	76293.8	73006.8	105213	48637.1	122006	110865	75907.1	16753.7	27496.4	68109.9	60057	180846	100910	77527.2	52506	18696.6	170861	44074.4	162920	221905	13658.6	22361.8	158317	32297.3	66362.2	78831	202088	56855.9	24147.2	81425.9	35162.5	40507.9	8360.33	77653.9
7.06_786.5645m/z	857956	995782	1.32031e+06	1.12204e+06	835087	2.47962e+06	1.05739e+06	1.89325e+06	1.14907e+06	1.13416e+06	1.70891e+06	1.40629e+06	1.44282e+06	1.17574e+06	1.56825e+06	1.41517e+06	1.23691e+06	1.75249e+06	906330	994301	1.75815e+06	1.39075e+06	1.56317e+06	1.97556e+06	1.29683e+06	780029	1.36159e+06	1.6009e+06	1.41614e+06	2.23096e+06	1.03824e+06	1.21222e+06	823300	1.32984e+06	1.09293e+06	1.45373e+06	1.2237e+06	1.01259e+06	844416	1.27113e+06	1.71285e+06	816064	1.41618e+06	2.18328e+06	1.54435e+06	1.42665e+06	907943	1.07782e+06	962271
7.18_756.5540m/z	13961.1	22925	67530.7	20938.6	8566.18	54170.9	32117.5	30732.9	11945.6	74408.8	52250.9	13635	30957.7	18796.3	22916	29606.6	18883.2	15119.7	8765.91	20692.8	35391.9	25567.9	49264.7	19515.5	33973.2	11667.6	25372.1	17053.4	32108.7	48364.3	24698	35696.7	13412.2	25574.9	25005.8	45240.5	15745.2	17168.7	20065.6	90552.6	31248.7	29531.9	29409.1	59848.1	8793.36	38715.2	34818.2	11246.2	59344.2
7.35_728.5589m/z	7341.34	21334.6	27108.7	23217.9	4133.33	57391	21006.1	73202.7	29464	72071.6	124200	21237.1	31011.4	24002.2	19918.5	18837.7	21848.8	92027.5	4554.67	17774.6	60167.3	38232.7	57768.4	62812.4	18967	31144.1	53624.4	56404.7	17322	42239.3	43531.8	20423.2	26361.8	17864.2	30335.7	63936.7	91172.4	38741.1	8158.74	66902.9	97856.5	26975.9	39483.2	62619.2	27606.7	30401.9	18342.3	26678.7	31517.3
7.35_788.5801m/z	325230	542384	630550	535007	421469	933266	617827	1.04023e+06	626015	930193	1.43872e+06	831061	663266	491362	570993	564927	518865	1.2887e+06	228558	523700	980334	760245	890098	1.15146e+06	534868	768169	1.05847e+06	1.08953e+06	553101	762447	905597	649223	645969	535606	538431	804457	1.35112e+06	739041	484640	751767	1.20182e+06	590743	625424	999263	706762	597407	541865	627281	644676
7.41_543.4417m/z	72527	65355.9	56493.5	54820.8	65959.7	58394.5	50416.7	60575.3	56914	63751	64408.9	59910.9	52021.3	66230.5	71486.6	60313.1	52488.6	58547.2	83786.3	59802.9	65780.3	83463.4	51068.2	70387.2	67509.5	63191.8	49895.2	57886.9	72995.5	61328	59404.4	63730.5	69163.9	47498.2	63197.9	61441.7	63048.6	54986.8	70751.6	52395.9	52102.5	61564.9	62032.1	60830.6	64608.8	70949.5	65182.4	65907.8	66539
7.41_865.6149m/z	10524.7	5301.57	23641.7	11521.2	10170.7	2458.01	12262.1	11405.2	9376.46	2425.49	5042.16	3234.03	5988.5	9868.85	9315.78	14141.1	5450.18	9042.11	5504.94	3572.13	6440.45	7905.57	9627.32	5908.15	6791.44	6778.74	5677.86	6449.59	8821.21	7744.02	7203.15	13838	9674.53	9045.93	5405.17	9085.75	5620.93	10327.8	3661.62	7538.8	4765.38	7818.06	6776.19	12341.4	4581.85	4048.8	6341.61	3284.86	7007.08
7.49_814.5955m/z	137222	118356	218685	168785	179871	329481	219148	301648	183786	315303	467672	281671	245545	177614	170326	190084	129309	339958	62308.7	186670	327235	285619	287523	328242	172556	170594	284189	295067	180037	237297	188009	230093	202783	238238	158969	227998	426257	163434	138421	262618	452684	175701	193181	331412	199529	212059	149550	173875	185678
7.60_724.5276m/z	13141.1	53360.5	62575.2	34500	9538.66	120368	24224.8	56493	51161.1	27876.7	98048.1	52260.1	18184.5	61336.5	122555	11211.6	13639.6	75701.1	24851.1	60291.2	174219	50635.5	123777	83373.4	38366.7	19838.3	44334.1	222942	45256.5	54308.6	101573	14623.7	43252.1	5892.16	35295.3	27934	77508.6	96410.6	18618.9	29779.2	30838.2	63169	116056	18954.4	16664.5	63927.6	82531.7	57041.5	63359.2
7.60_863.5637m/z	205974	261957	339811	316399	593809	564041	334580	292024	265847	397810	539413	517094	574995	223874	146816	407557	203033	417159	215248	393527	361621	238434	389308	314002	256752	523877	256041	245304	179934	422413	241246	199829	262692	218990	375811	302858	142413	370088	257992	284770	277860	407545	244632	394081	283038	318322	202317	190196	287206
7.63_698.5121m/z	75844.8	210124	251998	127281	179306	462581	207225	273218	233208	334012	459212	340380	316070	139196	200357	295351	232951	240710	54428.5	272785	376479	175631	403813	473874	374748	277772	405427	376732	173765	356482	319394	104035	304187	181943	188121	219039	424576	298776	146952	259419	276117	185889	234141	307455	261524	358433	204765	546137	183347
7.65_1008.5374m/z	26430.4	23174.2	19856.6	12100.7	14593.6	18204.2	26149.9	20221.3	19863.3	18430.1	13850.3	23843.4	24075.1	16055.1	20716.7	14508.2	22068.2	18015.9	18806.6	25725.6	12892.8	21744	12181.2	18281.7	20463.6	16546.1	20050.7	20277.9	21105.1	15948.5	8820.76	20258.5	20158.7	21109.7	17683.7	16778.1	14353.6	17547.2	20834.7	15554.2	25607.9	18793.8	19556.9	17326	20368	20734.8	22079.4	20991.6	18832.5
7.67_1002.5208m/z	98324.5	106647	79292.1	42395.7	98604.9	92226.7	99583.1	83779.4	108345	120095	106709	134061	118055	131234	113079	97696.6	94450.3	89519.1	115834	116989	78547.6	101375	91806.9	90571	88953.1	103154	83886.4	94348.8	103465	67525.3	102820	93105.7	86981.6	102968	102676	106818	95132.9	109837	112198	99234.1	127424	106767	97964.8	99430	99094.8	94326.3	93545	78953.7	87915.2
7.67_1064.4916m/z	8838.52	4226.59	3720.42	1662.62	5742.84	4394.07	5644.87	6050.39	2673.53	4075.75	4975.41	6205.97	6140.42	6936.41	4708.62	5319.6	7372.33	3164.2	4245.92	3951.83	2157.01	3998.72	4179.46	3589.87	2952.54	5365.65	5873.56	3964.03	6114.2	1688.01	2207.53	4498.06	4948.15	4036.96	4894.27	6258.08	3869.76	3181.76	5169.78	6313.45	5203.29	5348.37	5696.84	4563.49	7553.81	8684.17	5265.43	2235.27	3577.49
7.69_940.5502m/z	102832	104222	91195.1	47569.1	104178	101724	95380.3	86893.8	102431	103657	105066	115902	108964	106345	108782	99189.7	97342.4	96878.6	112625	110699	76433.2	85904.2	89235.5	84578.7	108011	113959	80393.5	82092.9	102388	62611.2	102956	104972	92499	121710	104956	126137	78041.3	98017.8	100296	93371.7	128085	99472.7	101798	96738.3	97847.8	90464.3	96435.1	87846.1	80860.5
7.70_804.7093m/z	22770.7	27224.6	38741.5	61392.5	52358.2	38226.9	21510	23184.7	24940.7	40407	42910.8	37228	29820.9	36129.6	29877.4	39891.6	29506.9	25945.6	35010.3	29796	31640.9	25437.9	32184.8	19307.7	25803	41837.6	17509.5	23881.7	29850.4	25037.1	19724.3	31508.6	14018.4	40223.6	50284.6	34670.5	18046.7	66389.3	20621.6	40314.3	27112.3	39476.1	26294.2	30858.6	27841.1	18086.1	35061.4	21756.4	26109.7
7.70_862.5353m/z	13284.4	10895.4	12356.8	7178.14	10506.9	16124.4	15597.6	23218	14300.6	12091.9	10216.4	10445.8	10510.7	12610	12443.1	12848.6	16828.9	15978.7	15507	9732.74	10913.4	12967.1	10986.7	8305.84	8890.12	10030.2	7730.14	9066.59	14490.9	10311.9	16614.5	13812.2	12249.5	17814.2	10755.9	15345.7	8996.62	9341.47	6009.39	6095.46	13670.6	6886.37	12688.1	12065.4	7868.41	14593.7	7950.14	11167.6	10881.3
7.70_934.5332m/z	228000	223068	214471	209963	298587	278004	202099	183617	232425	292963	300494	310357	261341	264090	244677	258523	211983	206038	270136	266290	200811	205284	221542	177559	213413	283359	175642	216789	246609	182758	201951	228181	171887	261136	284560	274553	182608	347084	232738	273853	281624	278872	216604	259473	229940	173306	241513	173002	197636
7.71_872.5630m/z	528976	512496	459083	426207	629332	575707	464181	466158	532834	632023	636694	660777	595777	586542	568265	536078	491388	477503	567614	573249	438490	489723	512344	451916	526699	660977	441256	485318	568694	393562	480154	500448	406887	575659	587138	604364	430429	764121	567798	576904	621943	577485	468302	582994	515847	404787	526578	398239	463644
7.72_751.5453m/z	2311.22	9328.79	18103.9	12087.5	6354.13	41168.5	7479.16	14394.8	15727.6	16724.9	27697.9	11826.5	7737.61	17758.4	11572.6	6164.47	4423.92	11128.2	4590.58	3312.22	24043	5284.31	5622.53	10007.3	4467.55	5531.84	21601.6	76689.7	8262.24	12113.9	14461	8330.58	7764.33	4853.9	19779.2	14259.4	22112.2	26679.7	4019.14	7996.57	15680.5	16717.6	20199.8	6952.75	6810.62	7613.19	10879.1	11015.8	4774.84
7.74_1682.1334m/z	34568	35947.8	29519.4	44374.4	29051.8	27117.3	29899	29702.2	20084.4	36700	49497.7	37322.6	25601.8	34822.5	39620.7	24857.5	30483.6	28297.6	32266.8	39248.5	23284.8	24067	29774.2	10676.3	25842	37126.8	14048.6	29065.1	26981.1	27896.1	27548	29774.6	15587.5	44647.3	44824.2	42573.2	4304.72	75952.6	38734.9	31158.7	21834.4	50773	20802.4	48924	26028.9	14311.5	38538.1	20715.7	20654
7.75_724.5275m/z	68929.3	112142	178808	76338.7	102169	306894	132890	153742	129415	215712	357596	268178	217920	102788	143688	194390	117335	144149	30848	170216	265828	99167.8	215449	243851	187157	134277	224723	256432	108666	228435	205240	106469	166409	135088	141505	153082	345381	177548	104631	203308	180779	146534	165377	223201	139924	231356	131225	210552	107491
7.76_889.5785m/z	3324.15	4115.92	8002.84	8229.14	23551.6	36879.7	19691.3	12524.9	6017.78	21723.1	17724.5	14318.2	18305.5	9651.43	5017.78	10675.5	12984.2	13574.4	8462.29	9837.33	10492.9	17558.2	13017.9	13668	9010.39	20059.9	16597.3	4404.04	3657.32	5101.79	3906.28	8219.67	11323.5	28099	11423	5827.59	9635.49	8587.36	18030.7	20330	18553.6	9766.04	6139.11	8204	3548.35	5882.78	11558.5	6554.22	9335.41
7.80_826.5942m/z	40452.3	53219.6	60837.1	41384.5	19497.8	48708.9	35806.8	45072.3	42775.4	31655.4	51414.8	34162.7	38176.5	66667.5	43582.4	31728.3	36811.4	38741.4	22901.4	24678.7	52064.9	35434.7	50805.4	35806.1	25890.2	32871.1	24785.2	41546.3	45423.9	45672.6	36824.4	43168.9	37717.1	23942.9	27329.3	37137.3	30134.9	49526.1	27329.5	56049.2	42143.3	54355.9	57308	38492.6	33666.6	28809.6	52007.8	48993	54876.8
7.81_1096.5249m/z	58606.3	17568.7	676.732	868.033	6254.54	1626.27	3590.15	4017.63	5432.57	6483.63	5267.05	7922.5	14705.7	5939.52	11050.5	5142.09	5619.69	6696.99	6371.57	3504.08	4128.18	3812.87	3187.07	1428.06	4518.74	17290.8	31129.9	6499.68	1121.12	169.117	43516.7	11447.5	11082.9	2915.18	1685.67	3762.99	3860.41	4006.57	11737.1	9801.44	13601	2868.69	4789.54	1720.96	9629.06	5200.02	1598.15	10121.3	9484.56
7.82_1642.1792m/z	21268.7	16444.1	56946.1	32440.9	23914.4	70073.2	30520.8	22874.5	17885.8	35785.5	36973	19769.7	96711.4	17584.8	16199.4	22557.2	20587.3	20193.6	21387.6	14887.8	40588.6	38988.3	21541.3	5015.13	15489.1	12157.6	9547.55	6166.64	18114.1	29523.4	15206.3	51375.5	12788.4	66505.9	34131.6	26937.1	16086	27832.9	9050.02	34187	22359.6	20770.6	26216.5	27503.1	8472.87	12704.9	17014.7	12855.5	30159.2
7.84_1606.1393m/z	63195.1	43873.5	39102.7	30872.8	41551.5	46177.2	58233.5	48370	37705.9	70118.4	47325.8	58283.8	41716.7	64941.8	52356.7	33486.3	61872	45500.7	42344.2	54023.8	32267.2	47003.8	43736.3	51903.6	44307.5	52255.4	27825.7	45414.5	37350.9	27890.7	32097	35210.1	45320.4	56773	46981.2	37349.8	48234.3	52318.2	64803.3	54970.3	56535.9	37296.9	39553.9	63639.6	58612.9	27580.2	43855.4	27113.1	48631.9
7.84_1616.1666m/z	5.03172e+06	6.94382e+06	8.69101e+06	6.197e+06	6.94763e+06	9.67778e+06	6.79306e+06	6.00367e+06	5.97532e+06	9.27329e+06	8.32849e+06	7.28771e+06	6.73711e+06	6.34585e+06	6.0085e+06	6.86695e+06	6.4453e+06	5.9992e+06	5.3286e+06	7.269e+06	7.278e+06	6.20073e+06	7.09738e+06	6.78723e+06	7.85578e+06	7.83316e+06	7.13889e+06	5.64144e+06	5.90036e+06	7.38121e+06	5.56009e+06	7.3028e+06	5.02254e+06	9.204e+06	8.14349e+06	6.23779e+06	7.51775e+06	6.79375e+06	7.37598e+06	9.0409e+06	6.48232e+06	8.34525e+06	6.91666e+06	8.39836e+06	4.93855e+06	5.00584e+06	7.3272e+06	3.66428e+06	6.47706e+06
7.84_771.5079m/z	20730.1	19312.4	28329.9	23934.8	25227.3	31383.8	18888.8	20450	23691.5	28105.3	25725.9	25203.8	21127.5	18601.9	18430.8	23233.8	20660.7	22812.7	15936.4	18451.7	22446.2	19521	25929	25895.9	23076.5	23693.1	23709.9	17877.7	16281.9	19796	21205.5	18844.5	17193.1	30467.3	22684.6	22073	28341.2	20958.3	21918.8	25401.3	24140.1	22159.4	22844.8	24914.8	18277.1	15190.6	20770.7	16999.6	18816.5
7.84_785.5929n	4.259e+06	4.94511e+06	5.37062e+06	4.13829e+06	5.11247e+06	6.16527e+06	5.06923e+06	4.74241e+06	4.69987e+06	6.19616e+06	5.75831e+06	5.60337e+06	5.47487e+06	5.07989e+06	4.76614e+06	5.03232e+06	4.87225e+06	4.53089e+06	4.28867e+06	5.29539e+06	4.85128e+06	4.74602e+06	4.98885e+06	5.09165e+06	5.455e+06	5.77501e+06	5.28124e+06	4.43177e+06	4.41917e+06	4.77054e+06	4.40609e+06	4.99792e+06	4.29076e+06	6.07796e+06	5.77549e+06	4.94428e+06	5.28927e+06	5.19209e+06	5.53268e+06	6.02286e+06	5.25625e+06	5.55184e+06	4.99308e+06	5.83538e+06	4.25366e+06	4.19888e+06	5.29754e+06	3.35128e+06	4.79587e+06
7.84_830.8587m/z	791046	1.04439e+06	1.23109e+06	895234	1.05015e+06	1.37287e+06	1.03475e+06	927961	938943	1.29064e+06	1.19012e+06	1.108e+06	1.02301e+06	969979	895931	1.01692e+06	1.00279e+06	929262	834607	1.10098e+06	1.03846e+06	950683	1.05056e+06	1.04017e+06	1.14524e+06	1.14908e+06	1.04337e+06	857119	888336	1.07817e+06	864259	1.09328e+06	807023	1.34715e+06	1.19003e+06	982660	1.09248e+06	1.01704e+06	1.13827e+06	1.2531e+06	1.01136e+06	1.11713e+06	996098	1.18479e+06	807990	806618	1.11421e+06	616923	1.02381e+06
7.84_831.1132m/z	406854	540114	691258	499758	565030	819944	583565	527511	512655	813622	742214	633909	610495	546233	503985	564653	547522	513108	446560	630861	626967	542757	605356	576079	647408	660228	607690	482078	510854	632345	430879	579618	420869	768471	703724	532741	654524	608104	667436	793672	560794	694028	576515	676035	419276	418146	619580	317325	569731
7.84_832.5040m/z	17843.1	26215.6	37747	22839	23857.1	41405.2	27866.4	21696.5	28234.3	51322.9	46885.5	33106.7	31225.8	19772.3	17771.5	31031.3	29947.4	30719.3	19990.3	40986.4	54519.1	25200.7	40042.6	31973.1	54396.5	51303.9	50609.5	24499.3	49058.4	99209.2	20554.3	25380.9	15242.9	39505.8	31987	24590.3	34291.1	32751.8	32777.1	56614.1	26412.3	41500.9	31937.7	43144.1	21361.5	20348.6	35615.8	13409.5	34524.2
7.87_888.5498m/z	20140	16546.3	17827.5	12236.3	22125.5	17357.6	14602.9	29412	22775.2	10366.8	15435.1	16440.1	19348.1	25802.2	22634.2	20195.1	15715	11495.3	21834.9	18274.9	13848	16331.9	14949.4	14365.3	11740.2	19769.1	23663.7	18123.4	19255.9	15910.3	10026.9	17614.8	18474	15678.3	19952.5	23074.1	11090.4	18951.1	18612.2	14458.6	15068.3	12093.8	15424.2	17800.5	19301.4	16862.5	14888.2	21030.7	13941
7.88_130.9671m/z	243.351	47.6728	78.9163	45.3016	81.2112	116.224	282.266	184.05	635.528	139.598	106.467	162.907	209.762	134.967	243.356	136.06	150.292	321.248	203.817	190.252	187.184	103.612	90.34	78.893	101.154	134.174	590.295	628.698	304.334	178.293	122.597	69.4785	119.339	79.2505	169.778	448.036	451.341	257.811	164.697	89.4727	134.324	128.842	177.883	162.958	255.712	272.384	122.438	382.991	305.073
7.90_890.6245m/z	9262.38	5711.48	12522.4	6387.91	10305.5	11454.7	11682.3	16327.5	12346.2	6405.9	8163.62	6856.95	11498	7105.73	4297.2	12409.1	10161.8	12558.1	10431.8	11996	12037.5	6645.44	8584.19	7583.58	5031.49	6278.06	4751.55	4339.94	8308.31	13281.6	7925.61	14143.1	7717.55	5552.24	4214.83	9767.46	5485.67	7458.81	4130.06	7664.34	11077.4	11260.5	11390	9013.02	7500.07	6080.31	6184.34	6663.23	5641.59
7.90_970.5206m/z	8611.96	2178.52	6498.39	5358.42	8321.88	4740.87	5307.19	10258.3	6358.99	5314.39	7101.11	2757.17	2533.72	4479.17	3630.34	7034.13	5881.86	5948.52	8643.69	3698.32	7771.87	4978.98	4564.96	4094.02	7438.68	4679.36	7098.54	4733.16	6319.56	5583.54	5639.26	7806.79	1646.94	3520.35	6051.81	4103.19	3353.55	12049.1	8041.2	5184.43	4624.28	7830.43	6854.96	5080.7	6604.37	5875.59	4744.41	4796.24	6720.32
7.93_1016.5754m/z	11434.4	16064.7	10056.9	9697.45	10630.3	9260.82	9663.87	13605.6	13940	13062.7	15753.6	9515.53	17335.8	20903	13688.6	14305.1	13995.2	13979.5	15554.5	14395.6	10408.8	11391.7	14684.3	8344	10050	8774.37	7500.38	11943.5	9820.52	9205.09	11582.3	17453.5	9656.5	13369.4	17074.8	19617.7	11541.3	16211.5	14471.5	14376.3	13568.2	14909.7	10720.3	12176.6	9535.95	13814	15053	11267.4	11010.5
7.94_728.5584m/z	15298	11358.7	22391.9	18669.3	9166.81	45551.3	21108.3	28041.6	29398.8	18707.8	20522	16005.6	23621.3	24534.3	22561.7	35377.3	19142.1	28793	20242.2	13036.5	34606	19672.7	20631	19685.6	16963.3	14932.8	20242.2	19476.3	27973.4	37279.5	16741.7	17702.5	13806.4	21251.4	16309.3	24949.5	14452.8	16376.5	11862.6	12499.1	22950.9	13790.4	25263.4	32905.8	21491.5	15818.9	15504.1	15806.9	15619.5
7.94_788.5801m/z	263627	224122	297211	284220	237627	548265	275048	396501	387376	254081	312622	327321	381217	330805	379652	430462	334118	367284	294538	217910	420333	349730	361740	340759	227537	208869	263421	307236	347397	450538	294199	271641	199004	292856	211932	378573	219556	235464	193629	267401	395708	211544	325102	400419	388931	281016	255284	249745	258457
7.94_904.6176m/z	10476.5	11756.2	19724.8	7337.5	12094.7	34662.9	16660.9	16551.7	22897.7	17199.2	13337.8	18853.5	20302.2	20616.6	12415.2	15296	11748.5	28093.3	11943.4	14219.4	20909	19281.7	14771.3	13453	7761.37	13849	14756.1	14494	15075.1	22977.7	33404.6	12675.6	24656.1	10808.5	7634.82	15670.1	14876.8	9465.5	9939.07	8136.88	16355.5	12417.5	14471.2	12033	19739.4	26113.7	16882.2	16586	21558.9
7.94_914.5650m/z	29180.6	33179.8	34532.5	23607.3	32598.4	33987.2	40446.5	50246.1	34930.7	30607.6	32512.9	28841.3	47446	41697.5	30264.8	33321.1	34255.7	40956.6	34668.4	46534.6	25711.6	34730.6	31540.5	25299.6	27106.1	25968.8	40419.5	32726.5	27902.6	30410.1	29882.2	38019.6	39867.1	40931.6	31699.8	28448.5	24919.8	31223.4	25361	38024	36618.3	30033.6	33531.4	43772.9	29943.1	24588.7	28448.4	27257.6	24262.2
7.96_775.5506n	775259	645429	1.22524e+06	443817	380569	960261	630752	999089	1.01671e+06	524704	829388	567562	672993	603978	642868	672847	968567	782551	528776	797576	1.22035e+06	593546	824852	778789	521668	680315	718573	822845	779649	1.06787e+06	1.2979e+06	666971	757676	410281	463687	733603	578554	870380	588854	655836	699933	704666	873163	643598	692865	853263	620430	809711	617670
7.96_843.5387n	35536.1	27670.4	48308.2	16998.4	24093.1	42872.6	26983.8	48045.8	45428.8	29903.3	34061.5	31877.3	27577.9	27549.8	28307.9	31678.9	48406.3	35547.9	23806.9	37901.7	51903	24819.2	34772.7	35093.2	24305.6	30596.4	38567.5	30268.6	30736.2	38250.7	54643.4	31937.2	37178.7	19734.4	23700.4	36972.9	26946	37134.5	29992.1	26691.5	31655.4	35189.2	39918.8	27916.8	34716.8	36560.4	26163.6	36801.6	32997.3
7.96_872.4978m/z	7829.48	10769.5	11999.9	13498.6	45227.4	6132.88	16756.9	11598.8	5679.19	29378.7	14929.2	19766.8	6784.71	7356.2	2881.19	16566.6	22105.6	15182	13254	19713.6	11021.1	9769.15	6650.73	5894.79	21192	21317.6	17517.9	9278.68	19085.7	9791.11	8765.61	23996.7	9595.61	19717	15301.9	4176.37	3732.31	22178.3	14131.3	15734.9	9402	33149.4	12549.1	10466.8	7411.25	9249.59	13111	4937.95	18046.8
7.96_878.6017m/z	27054.6	27009	28978.8	27671.1	41876.4	38344.8	43466.2	42182.1	32280.7	47492.9	34318.3	39225.1	34782.1	35528.6	30920.6	41309.5	42750.2	48776	25244.7	43010.4	43742.8	41287.5	30952.2	37658	27240.6	28229.6	37972.5	36398.1	38085.5	37991.9	43738.6	48844.8	37862.7	29736.3	35436.2	29309.7	33022.5	33691.1	29556.8	27041.3	44137.1	40116.1	33184.3	33672.9	38286.1	41899.7	31960.2	31832.8	46300.3
7.96_886.5774m/z	8390.22	2841.79	10349.3	2905.36	3326.57	8388.72	3552.25	9290.98	6081.02	13374	15765.4	6397.43	10616	5138.58	6268.8	6119.9	8899.28	7859.24	5715.33	5574.78	7649.83	5454.54	11641.8	5262.97	6238.51	6638.68	5948.33	6139.89	6076.26	7729.24	5640.03	7273.24	8081.13	5930.68	6453.75	12518.6	3268.54	8220.82	3712.1	10759.2	6267.51	6931.92	6751.56	8938.15	5162.32	13153.9	10364.5	5424.32	10982.9
7.96_904.5079m/z	15827.6	16666.4	21499.8	7101.33	9402.65	22304.7	16317.6	21622.8	27273.7	18094.9	17556.5	17904.2	15313.5	10824.2	12315.9	14319.4	20224.7	20702.5	13779.4	17143.5	21815.9	13776.1	16422.8	21702.4	10019.7	16121.9	23668.6	14199.6	20002.2	25204	30279.1	14259.4	24611.3	11828.1	8722.31	17552.1	13961.8	17851.7	14584.6	8457.84	17606.8	14481.3	18434	13868.9	19400.4	25761.8	13209.4	18122.7	20699.9
7.98_868.6088m/z	20397.4	20975	33106	16660.5	7011.22	13743.5	15567.5	17438.1	11298	15927.7	14831.4	10007	18916.8	34421.7	15488.1	16489.1	16629.2	9344.18	13619.8	19706.8	21382.6	19513.9	20470.1	8993.48	13621	4760.73	13460.7	19986.7	18315.2	26096.3	20735	22292.9	10601.3	13843.7	18701.9	23580.3	7513.45	20048.8	11935	18872.8	15112.1	15579.3	25252.4	12242.9	15099.6	18382.3	12229.6	15520.9	23072.2
8.00_730.5751m/z	57795.2	39070.4	86825.6	82114.2	85244	113360	57324	89446.8	90790.9	90812.8	77997.8	57806.7	79022.2	93616.6	86273.5	72017.8	60021.5	99254	60040.1	57579.6	85875.8	79388.1	75666.2	72225.2	40505.1	64708.1	57642.1	65478.7	83159.2	80484.8	65049.2	66841.9	53222.4	78114.7	56922.8	79331.7	76843.2	58411.2	34030.8	79861.7	101712	69046.3	78355.4	84648.4	74929.3	75434.8	60980.7	56762.2	78529.2
8.00_790.5965m/z	650392	460385	904570	841361	1.00712e+06	1.34648e+06	722562	1.06951e+06	1.04968e+06	803981	858280	730186	1.00565e+06	1.06039e+06	1.03446e+06	873073	686656	1.02193e+06	688155	742251	1.0298e+06	930064	891262	896504	490659	711396	674749	728708	947446	869175	659329	683414	685434	865159	598889	1.08646e+06	961295	673869	522955	757554	1.24981e+06	786494	835838	955665	853454	668717	662263	633180	902891
8.00_904.6141m/z	988.443	6335.87	8168.82	6466	2415.51	12311	6209.53	3400.34	4782.15	6433.4	6680.68	7626.9	4945.34	5807.41	6345.35	8682.3	6719.47	6814.86	5880.98	5214.74	5382.75	2883.7	4832.46	6977.58	4713.01	6007.06	3391.72	9074.62	4169.56	7931.13	8963.1	4265.83	5095.27	5716.5	4384.07	4186.48	4114.87	3881.09	7050.63	8382.17	4735.34	3279.22	2977.93	9106.12	4581.06	4545.23	5936.52	3361.7	2842.99
8.02_1044.5702m/z	12565.1	8363.1	15118.2	9010.69	7445.46	5684.2	3955.09	11764.9	7120.68	5520.44	7959.24	7049.63	5977.14	12427.2	10268.9	12106.9	8153.41	9453.97	9949.29	7126.04	7615.04	9264.03	12318.3	9128.68	10230.4	11501.7	9136.15	8252.09	3573.76	5006.49	5486.18	9590.05	4978.74	7018.82	7188.72	7858.25	8460.89	11931.4	5299.09	7512.96	8789.96	9742.73	9832.78	10175.1	4349.51	5100.39	8195.25	6459.66	3257.62
8.03_814.5958m/z	334082	262553	462535	366752	271710	694557	372946	641182	403536	390651	517468	443593	454695	451517	465202	496367	438528	758155	360792	401525	594752	517266	533374	564878	350944	316257	384912	502571	555933	679948	439556	421122	306639	427507	333211	592087	392550	322578	280495	493098	622560	314217	487540	662258	455231	425668	341306	372454	380712
8.03_840.6115m/z	1.31325e+06	861741	1.50646e+06	1.15689e+06	991495	1.20961e+06	1.148e+06	1.87234e+06	1.5174e+06	980423	1.09801e+06	816733	1.10642e+06	1.50402e+06	1.13933e+06	1.23537e+06	1.06347e+06	1.58619e+06	1.00469e+06	849722	1.59044e+06	1.05268e+06	1.31043e+06	1.13352e+06	636659	922333	807077	1.20629e+06	1.13689e+06	1.25595e+06	1.062e+06	1.11928e+06	1.02818e+06	636961	747459	1.29023e+06	1.14303e+06	1.62984e+06	883387	1.17788e+06	1.42312e+06	1.47924e+06	1.1335e+06	1.12195e+06	1.23356e+06	727374	1.06343e+06	1.27116e+06	1.15229e+06
8.03_934.6165m/z	11599.6	3633.37	9448.86	11961.2	9583.64	6345.39	6575.94	11330.9	11067.1	7098.81	13925	5318.02	9644.13	6555.79	8832.52	12119.9	6678.3	14952.1	5685.1	7608.99	7600.04	7342.96	11863.5	7348.64	4952.19	4999.64	3809.41	8224.57	13255.7	12723.7	11560.2	12159	7283.54	2227.57	6958.16	7946.97	5730.46	10906	3571.35	6317.03	10495.6	8178.05	4113.84	10385.3	5351.32	3249.36	12203.6	7667.91	6319.96
8.05_1089.2424m/z	10096.5	1.23784e+06	1.2654e+06	1.14101e+06	1.07569e+06	1.20085e+06	1.01024e+06	961595	917926	1.04148e+06	1.07005e+06	889860	888405	880489	859347	800404	773920	749830	18194.6	730137	1044.62	691687	669171	626299	651275	640634	2203.76	600793	581518	609534	12350.8	1.26845e+06	953850	1.16335e+06	1.12658e+06	1.08971e+06	885080	1.15917e+06	948150	961202	857961	935511	840971	881202	795033	671967	834932	653056	2543.39
8.06_1090.2436m/z	10339.1	922769	886185	785677	720434	780488	2951.24	642331	5705.46	805801	888844	784368	787034	763403	716620	626618	260.523	544584	16102.5	2163.01	568529	575235	573321	1260.42	587942	588557	543698	577639	3563.19	610762	4013.06	924322	626560	754751	2725.45	738199	651355	919458	803443	851664	756515	801836	679824	679231	2517.65	485162	605596	1437.09	531382
8.06_784.5850m/z	3662.53	2645.41	3541.83	1442.97	1376.73	5708.26	5393.2	4680.01	6639.6	4948.19	10415.8	5641.73	6554.92	5636.15	735.041	2945.03	1609.72	1233.12	1754.99	3193.4	4514.55	10229.7	7989.96	4073.13	13412.5	8399.08	4864.21	1409.22	1606.38	2745.5	2562.68	6136.29	2306.09	2562.67	2033.62	5537.46	2471.42	5738.66	272.473	12087.2	6568.17	1994.14	5426.21	4568.31	2199.11	1120.67	2225.93	411.65	3170.9
8.07_1012.5743m/z	11350.5	16805.8	15515.4	15550.9	13810.7	13645.2	12268.8	16646.4	10665.1	15338.4	17547.2	12692.2	15642.4	17826.6	23837.8	19691.3	16947.9	24874.4	18224.2	12280.4	15721.7	11811.9	8370.69	19675.3	20055.3	6604.94	11152.6	17837.6	18777.8	17095.4	10389.4	9985.64	7104.51	16283.9	20813.4	21437.2	15245.3	27993.9	11268	19554.5	13001	12334.8	21122.7	24991.8	14916.7	15546.1	19031.9	18511.7	15453
8.07_888.6217m/z	8152.35	10171.5	14145.2	6420.74	3417.79	11784.5	3281.49	6142.06	4746.78	4640.4	5512.14	5265.49	6001.41	7730.88	5206.43	6419.37	5552	5599.01	5390	5033.65	8743.77	4686.17	7336.92	10711.8	6945.27	5650.09	6141.26	12042.6	5823.65	8732.97	7271.82	6196.7	3261.33	3124.99	2625.96	2158.89	3179.42	3521.5	3959.61	5707.71	8353.25	3555.32	7635.48	7513.55	5935.74	4504.04	5654.89	4550.88	6375.3
8.08_1524.0682m/z	4039.28	3832.55	24011.6	2027.12	4066.16	24667.9	1949.96	16508.5	8742.61	5796.14	5364.72	5622.89	1920.07	1878.23	7745.01	3804.84	722.529	14149.6	3140.43	1242.38	74305	2618.16	21792.8	7137.14	13127.4	14154.5	2324	43989.4	4987.02	87633.5	5892.12	1030.04	5248.72	6017.67	1293.42	11468.9	5110.72	31091.8	3704.24	3519.41	2403.34	10090.8	8131.49	1135.37	5621.56	4013.7	4109.61	11509.3	1018.05
8.08_892.6419m/z	173659	71785.7	169985	129646	156521	127870	150476	212957	121663	88945.9	118790	79971.8	177856	177214	125582	139614	79765.7	151685	93463.3	97073.6	110276	186712	148106	109002	88231.6	131895	63918.3	125250	108198	141005	99255.2	174414	158932	142261	98576.4	98418	114838	101321	98769.5	127970	173863	155840	124498	138939	118143	69089.7	95441.7	95568.2	131769
8.10_721.0619m/z	365.912	164.91	171.789	39.2116	647.626	971.902	4706.04	3974.73	1394.45	1240.45	1174.7	447.135	3766.29	1646.9	3834.78	2905.14	3931.76	860.988	522.513	1391.5	1144.53	939.845	2496.18	1192.9	459.732	925.95	1585.75	1335.71	6085.5	1715.66	201.457	74.0502	705.998	691.945	4782.13	5014.51	880.112	424.407	1169.77	497.697	3088.61	1954.28	9465.45	1234.56	1767.53	1303.36	558.844	1110.71	510.783
8.10_756.5898m/z	4879.22	7481.59	5472.19	10308.5	2275.34	11640.6	7672.55	23030.6	8147.25	16013.1	14157.7	6151.61	4118.69	11596.9	3286.18	6024.8	10126.4	28829.5	584.495	4765.65	9659.51	10567.5	17346.2	10985.2	3821.86	5574.92	11836.2	7184.56	5510.34	7719.38	14310.4	6039.17	5358.19	5280	9512.51	8244.6	8846.04	11646.5	6045.11	23248.8	31315.2	6573.84	6122.52	14269.9	8317.79	9156.09	5608.94	8720.02	11172.3
8.10_816.6113m/z	215038	194746	359846	252935	209016	377472	254713	521278	374104	257987	376404	269739	272451	292722	226016	308015	308269	573558	166618	258298	445674	297618	370690	411388	179101	325164	332276	396645	262850	316545	347061	270289	288921	217838	193332	354842	369649	397500	220799	340057	525219	268178	285995	365382	315813	257451	241469	315677	255210
8.12_806.5943m/z	426354	439169	662873	560429	457299	583128	581890	563434	478689	650405	631969	510390	493164	581329	440803	503264	501031	480923	404311	520602	552108	508400	653774	425166	436817	515758	491611	469037	520479	622986	473003	454774	357780	534708	652890	528243	373646	698140	505063	510330	512604	649361	574568	540414	506918	435107	532925	397911	459571
8.12_874.5825m/z	19953.8	13135.7	22168.1	17077.2	11984.3	25751.3	19016.8	25274	19788	25936.3	18650.8	16852.4	12444.6	24505.6	17175.2	19140.6	21870.5	20366.7	15051.1	23004.9	22181.1	14177.8	20633.2	12292.2	14116.1	13818.9	15239.3	14719.2	9875.35	17530.5	20900.9	18799.1	15659.6	18784.2	27795.1	13905.5	13841.4	24199	18745.8	15721.1	22233.8	23427.8	13730.4	17808.3	23987	20731.1	18956.6	11692.7	12896
8.13_861.5897m/z	11379.6	8512.05	19746.8	10579.2	11159.3	17230.3	14730.8	19930	16466.5	13231.9	12507.1	10963.4	16976.8	18054	18062.1	15509.2	19488	20235.2	14052	11414.3	13579	16554.2	18916.7	15390.5	12470.7	13409	17734.2	16921.5	20034.2	15819.8	15524.8	13495.8	8396.31	16916.9	12063.7	16533.6	15168.1	13673	6319.86	14132.6	17945.1	16293.8	15208.4	17250.9	10258	18736.7	13918.1	22351.6	15937.7
8.14_802.5680m/z	27099.4	18931.2	26438.8	20665.3	18643.1	18195.7	18784.4	24847	21598.3	22867	13052.4	17360.6	26472	25895.9	24943.5	24693.4	27005.6	22366.8	19218.8	21745.8	24198.4	29699.6	32505.4	26509.6	25025	25593.6	28443.4	22794	26196.7	23656.9	20476.7	21760.8	15449.8	27153.7	12595.9	21318.8	17479.6	18763.9	19176.2	19243.1	18151.7	17971.2	17381.4	21900.1	25229	22426.9	16363.2	24665.3	23132.2
8.15_1030.5536m/z	27922.3	26963.8	18571.2	14356.4	36747.1	18172.2	19310.9	14336.8	22067.2	19270.5	20905.8	34333.3	29332.4	19192.7	23146.8	22863.2	18471.3	22253.1	23032.9	30198.4	15224.5	18606	19834.8	18834.6	14020.8	23990.7	17961.6	18343.4	21260.1	15564.8	16042.6	11990.1	17125.1	25576.9	36031	16100.4	17712	39270.1	21573.2	21486.1	25398.7	17934	15946.4	23990.7	20173.7	17683.4	21473.4	10675	16283.4
8.15_1036.5693m/z	6661.16	8053.05	8392.71	4712.13	16524.8	5814.43	8142.72	4993.66	10318.7	8343.13	8535.53	15004.7	13419.1	14483.1	5503.9	8132.64	12651	10223.6	10968.6	13818.7	5025.56	8871.83	6931.24	3789.93	12289.9	15590	13386.7	9087.7	7472.09	3475.44	6797.46	3414.89	10662.5	6897.57	11724.7	7348.77	7234.76	15638.6	11268.6	4978.53	12774.2	9829.89	9765.18	11269.8	10092.4	7434.48	8862.28	7689.95	10024.9
8.15_752.5583m/z	27962.8	61971	167885	82721.2	20252.7	154982	107193	128872	159983	42375.9	87788.6	26858	36470.7	149897	85393.5	73536.2	44977.9	121345	79860.6	101928	208140	81764	106916	91813.7	50610.7	55750.4	84667	316415	64109.9	80137.1	209186	68864.6	68690.3	33355.3	54330.6	129681	55540.1	212020	34888.5	69076.1	131970	92215.5	155123	39541	69116.2	69520.8	58016.2	111523	58925
8.15_968.5819m/z	34239.8	40426.4	37681.9	31803.1	77909.9	34193.5	42240.2	32120.4	35184.1	52776.1	52585.8	66229	58824.1	40824.2	34490.5	37308.6	30839.9	39407.8	46702.9	69016.2	28963	31555.6	36915.2	36262.2	45129.7	66331	35648.7	35416.8	39444.8	24925.1	29362.6	30812.9	31254.7	50038.4	85449.7	35230.2	33531.4	74425.8	44649.6	46131.8	48349.3	40617.2	30456.2	56063.4	34011.2	36376.3	36618.2	24366.8	27916.6
8.16_726.5433m/z	381637	500016	907360	346172	416130	1.50298e+06	613430	908793	864722	714426	1.22194e+06	896354	841043	501147	525686	802121	744025	912096	288758	922979	1.19916e+06	556970	1.14676e+06	1.06664e+06	747532	781518	845442	1.06087e+06	537942	971170	1.02749e+06	487509	745785	582275	542574	711209	944589	831162	404742	873710	943689	559386	735913	881575	721530	1.00774e+06	558815	1.08151e+06	653608
8.16_856.5009m/z	3851.59	5869.46	7010.89	1321.6	2439.47	16577.7	8747.63	18067.4	15937	10426	14025.9	10759	10194.4	4563.31	4808.49	9623.72	10670.8	12500.8	2803.18	13998.3	14706.5	7787.14	16127.5	17784	11633.7	12953.5	13908.1	12894.8	6814.85	8788.34	12280.6	4167.93	12123.4	7758.71	4277.89	9833.56	17998	9054.22	4824.27	8060.82	11791.8	4895.29	7873.13	8745.35	10694.3	16133	5787.29	16487.1	11622
8.16_900.5948m/z	163757	186467	171046	230412	425278	179113	152655	148897	175012	209620	271550	315410	272963	195868	156024	207749	155472	185768	215461	293405	189045	136112	196507	140685	201321	286040	165858	163510	177205	154570	139677	118647	121755	214642	437400	152548	123157	387299	180594	261251	184692	209613	159182	305712	149943	151278	188268	114038	151457
8.16_962.5657m/z	47666	49883.9	56778.4	71261	117394	57620.1	51514.2	49664.5	51566	66573.1	79990.6	87853.4	76501	50265.9	41658.5	62022.2	48244.3	59364.6	62763.5	84000.7	57712.4	41929.2	56590	44739.8	56767.7	83206	53141.6	51358.4	53733.8	48198.3	40600.1	43193.8	42855.8	77817.6	129657	48792.2	45458.7	111041	52810.4	73288.9	50668.2	59491.1	49048.4	83678	43415.4	38131.4	52547.2	32984.8	49948.3
8.17_1014.7089m/z	43939.1	10019	33445.9	29271.7	26460.7	45220.2	30826.8	39002.2	22522	37808.2	20174.9	24330.4	26783.1	42708.9	76838.1	31114.9	44410.5	32864.4	36931	21356	33300.6	26908.1	36838.5	43215.6	32265.6	25546.1	42597.5	24818.9	34762.9	41026.7	33018.2	49562	24989.6	31270.9	37938.9	34626.4	55447.6	7143.35	26603.7	36145.7	37528.5	22289.9	35355.2	61916.5	26168.7	30937.1	22758.8	25736.2	33531.4
8.21_926.6124m/z	25442.4	30463.8	37122.3	37207.1	40850.6	40735.7	25751.6	24455.6	20899.7	31312.5	44800.8	40986.7	40498.4	33809.4	16122.2	31895	26838.9	26588.1	23311.8	33444.3	32535.4	24405	28357.8	27068.2	24354.2	35310.6	32056.1	23197.7	25212.3	31240.2	16571.7	25444.2	15398.4	43252.8	74783.5	23415.7	19270.2	39945.1	26293.2	40201.5	27728.6	39172	19619.2	39917.2	13000	17660.9	26590.8	21635.5	26485.1
8.23_777.5626m/z	5708.57	4056.55	16276.5	3503.35	1605.78	23082.7	16537.2	24886.8	40847.1	8314.58	13648.2	5717	10526	20993.5	9416.19	20782.9	20586.2	15513	11611.5	6398.05	39207.1	17635.9	33112.3	33200.7	5371.63	25518.1	20151.9	21087.6	8761.32	11826.1	10086.2	4915.41	3530.24	4212.84	3948.5	10550.2	3971.61	41459.5	1935.3	7816.15	8170.76	11025.7	16195.4	13111.6	9713.9	10927.2	9858.65	17507.4	6140.67
8.30_868.6422m/z	69121.7	46504.4	92837.8	84455.8	52332.4	70963.6	44726.2	105986	68331.1	58870.3	78042	35200	50118.1	102090	59528.1	73049.5	72991.1	64030	61896.7	45974.4	83428.2	56096.4	84649.9	59193.3	34719.1	47382	37795.4	43480.9	74808.8	86290.4	55933.2	71404.5	25266	44790.4	28788.3	82853.8	79279.6	45984.9	42948.3	77782.4	80669.5	74572.5	47772.4	67781.1	57694.7	39599.3	83010	97581.9	64998.8
8.33_830.6012m/z	6895	9276.09	10711.6	7373.75	9535.8	10444.1	9700.6	9132.64	7119.3	10026.1	10105.9	9659.38	8427.59	7312.59	7766.02	9763.48	8321.68	7798.03	7412.4	8755.06	8229.98	7109.44	8745.21	8761.42	8189.01	10822.4	10270.4	8379.94	7618.55	7795.41	7709.11	12198.6	7573.93	12855.1	8432.58	8406.53	8364.15	9760.15	14849.5	10808.8	8655.05	8244.57	8447.29	9326.55	7751.52	6340.75	8733.82	4969.65	8641.63
8.34_816.6125m/z	29350.5	22678.8	38819.2	36656.1	31530.5	56137.9	35661.1	51050.4	49145	35647.2	38352	46452.1	34692.7	33151.1	47396.5	46375.7	33082.9	48521	37730.8	36253.1	52535.3	41474.7	42909.2	42140.2	27279.3	30372.7	32902.6	40734	38256.5	49468	37037.8	45174.2	23616.4	38703.4	22220.2	41410.2	26709.5	24793	20740.6	36796.9	39659.2	25160.8	34893.5	47027.6	40348.1	30033.7	27938.1	27347	35112.8
8.34_826.6401m/z	21183.6	46237.7	41901.9	51507.8	34239.1	57845	38455.8	45792.3	49264.5	35603.2	42550.7	48943	31735.1	20861.9	44555.7	47479.4	32064	46464.9	28950.8	32606.2	40891.1	38751	36564.5	42596.8	23962.9	25398.8	55094.3	26974.2	41840.8	28139.5	24686.1	66588.6	37132.9	59326.8	13585.1	32392.8	32653.2	31773.5	32413.6	43189.2	24567.2	32445.4	28263.1	45036.4	37123.5	6866.23	36827.9	26701.2	33555.6
8.39_783.6374m/z	297481	304072	404560	294965	120636	389550	303513	239886	197008	248632	300005	231532	217736	251351	354916	315022	330663	228256	207026	228183	292309	300482	327906	341877	285964	319655	276852	351795	298064	349047	280995	382776	239566	306635	271715	314761	200039	230764	253972	293666	195614	202459	363760	482104	254915	247989	316076	258605	271545
8.39_911.6472m/z	144486	131532	183314	137297	44311.3	177036	138862	109140	81717.4	114664	124925	112866	97735.8	114496	154891	137532	148585	101252	91707.6	99110	129621	127459	131323	141512	120758	132538	108585	147069	129619	150786	123781	177486	99302.2	134951	128330	128842	79842	103213	106213	132078	90674.9	92711.3	164441	203855	97076.7	104032	131231	110446	108888
8.40_1031.5949m/z	1182.04	1503.6	8450.33	6866.36	2763.81	5035.86	3810.96	5176.04	2643.46	2473.25	2595.53	2152.8	3710.53	2163.55	4267.6	4477.32	4556.42	4048.92	2959.85	2538.67	3783.18	4306.75	2017.58	4021.42	2903.01	4090.49	335.38	2297.54	4152.18	5236.21	561.441	7269.89	3666.32	3439.73	3910.38	2778.32	517.794	4079.91	2955.48	4471.9	5279.61	3052.7	5361.47	7058.36	2404.51	1096.47	5307.97	2789.92	4699.02
8.45_920.6746m/z	362466	136811	346032	284322	307871	274168	288922	452215	310695	162275	229740	210479	310992	376096	279109	251768	144195	309029	216718	181511	233962	404485	314114	269097	210218	268089	164713	262778	226237	300979	228732	422950	331096	376735	178035	212013	206928	216224	199368	233060	335330	310940	232560	302731	267899	138204	195910	225905	222841
8.48_1006.6944m/z	13492	5169.52	10334.9	6078.25	18983.5	14410.2	7105.86	14175.9	12965.8	12373.1	7490.02	7312.73	11353.1	13644.8	11428.1	10396.5	13586.1	13125.1	11835.9	8548.17	9291.34	5638.17	14137	11529.5	6264.46	5924.06	8389.63	7574.01	10767.8	11519.3	9815.64	10549.1	10254.2	8978.85	14559.4	10144.5	14250.1	7086.16	8546.82	13773.3	15955.7	12528.5	9971.77	14778.4	6850.62	9104.65	5779.86	8829.25	10061.8
8.48_743.5820n	332921	210006	511502	223381	219236	476074	240016	304858	373610	262799	447452	285978	385325	356280	325774	348093	319129	393769	214742	324042	626923	268304	486160	323014	265228	317838	271470	463916	252826	454479	338632	198938	256569	218970	260249	375121	251221	487184	135925	327781	317686	305585	371160	319291	338140	350971	317577	440182	291272
8.48_846.5630m/z	9335.39	4230.01	15322.6	3056.64	4591.8	6955.73	4497.91	4783.91	11267.1	3923.1	5382.07	5284.93	12593.4	8224.34	7713.59	6164.22	5893.74	8727.08	4751.93	7373.41	14270.2	4304.47	6959.76	3923.56	5723.33	4378.57	4763.71	9695.16	3430.87	9358.28	8756.11	2698.26	7277.09	3647.79	3543.25	7438.73	2012.34	13057.4	3358.17	6893.85	2962.33	7408.56	10941.3	4903.16	6518.46	9245.16	6404.95	8919.19	4909.49
8.49_1016.7247m/z	146717	55145.2	112625	126441	210922	159237	105912	143576	157356	170293	123766	93829.2	136578	144753	209047	123605	162904	167218	175875	108721	151315	104999	170341	140527	119820	138953	149674	110266	178005	220532	108820	112696	69180.6	93138.3	159338	160050	180796	86906.5	107108	154627	196701	130023	118008	201648	111852	121934	105198	109392	115936
8.49_1191.5942m/z	2811.6	6054.25	1799.56	4534.05	8176.05	5428.87	13515.8	9805.22	8644.85	8580.24	5060.57	8071.77	10224.8	5772.44	12657.6	3790.92	8837.82	4975.42	7371.51	14920.9	4915.63	8098.71	4060.18	6479.95	4836.63	8181.37	4210.8	8591.39	7794.98	5409.65	5305.6	2476.39	6946.12	8535.06	5321.09	5842.54	5432.64	4178.29	10716.6	3724.38	9069.89	8691.21	6910.54	9959.17	12012.5	9543.67	5829.9	5765.32	11616
8.50_1061.6369m/z	45542.7	34849.6	22877.2	15729.6	28434.2	18673.3	24135	38575.2	30112.5	36926.1	35862.7	38106.1	35998.4	40626.1	31966.2	26162.4	33395	27273.7	43670	37695	20935.7	34427.1	24934.9	24475.5	24764.9	32250	31089.8	30219.2	25976.7	19138.7	31971.1	26251.5	18546.8	26458.7	37564.3	46925.3	41353.1	20823.3	25577.7	20465.6	28498.3	31117	31729.6	28574.9	38643.3	30571.2	30409.1	30364.6	26429.8
8.51_896.6786m/z	30166.5	10441.6	30282.1	37645	37005.6	54163.5	32579.5	50962.1	40812	28379.3	28073.2	15950	31936.3	41266.9	19188	29367.6	25153.5	39658.1	16533.8	23982.2	37313.1	60403.8	48698.8	61291.9	24594.4	32345.8	41275.1	31076.3	18094.1	36973.3	28902.8	62874	40987.2	67784.5	16408.2	20971.2	28016.3	20307.1	18622.6	29691.7	64734.7	24652.9	20491.3	47049.8	26380.2	19162.4	24272.9	14832.2	20294.2
8.52_990.7031m/z	20997.3	18033.2	39403.9	28701.4	34230	22871.8	29015.6	34515.4	38121.4	34471.4	23512.9	24098.1	23716	31036.4	32269.4	15486.2	33110.1	23945.2	25800.1	17857.7	25934.7	21829.4	29407.7	31308.7	19534.6	20337.8	28855.1	25742.4	40548.5	40243.5	20181.9	42547.9	21266.7	32482.8	44451.2	37336.4	22011.8	24287.4	27486.9	33675.6	31572.6	13916.8	27181.2	29668.9	27444.5	23153.9	20013.4	21270	22018.8
8.56_754.5746m/z	27282.7	14528.4	65258.2	19344.2	38532.8	69282.3	32198.5	43831.6	54732.7	28187.3	71121	50115.1	88282	20536.6	27328.5	50050.2	28786.1	32981	10883.8	43811.3	66930.7	29878.4	56223.5	43181.2	54040.9	51676.3	43704.4	58713.6	30550.3	43960.9	58333.8	26015.4	53746.1	44437.2	21283.2	37311.3	23882.8	46071.1	14679.8	53788.7	27724.8	31203.1	40994.6	31293	31633.5	38025.4	26755.6	50297.7	11839.4
8.59_1019.6639m/z	917.905	5158.48	2914.43	4650.76	3780.88	3582.66	4929.93	3526.44	7373.07	9132.94	8885.96	7126.08	5823.39	5751.56	5354.79	4355.98	2739.99	1995.36	2823.95	2823.89	3719.84	6466.78	7473.11	6256.32	4194.14	4025.02	3204.19	5469.99	6061.85	7810.36	4524.69	5398.38	2271.82	3409.17	3794	3215.26	5921.67	11812	8117.61	11270.8	4666.8	3871.71	4893.68	5406.14	2772.05	1292.16	2964.1	2628.32	2851.35
8.59_1123.6076m/z	12533.1	15673.9	27271.3	15392.3	13794.8	22984.6	16552.5	12679.4	16421.6	25849.3	17986.5	19562.5	17510.5	18829.7	23071.3	24735.8	28015.7	27217.8	24829.8	15328.1	20938.4	18143	21984.9	23092	18399.4	24334.8	17933.2	22484.1	25216.2	19345.8	19629.7	26395.6	16715.5	18364.5	16869.2	20336.6	16504.3	19166.6	21357.3	33617.4	21833	23828.8	18910.6	25033.2	17563.7	25177.6	17745	16364.3	18910.3
8.59_1191.5940m/z	13129.8	7559.23	10038.6	12093.4	10329.3	8560.08	12954.5	12831.9	11765	17075.6	7792.04	10058	11536.7	15383.4	16807	15292.5	14451.4	17441.6	15945.5	19046.6	5925.11	11414.4	11058	12165.7	15522.7	11817	10804.4	12111.7	13181.2	3412.98	9137.03	9875.45	11580.1	8466.02	11709.3	13283	14387.3	16888.5	8976.05	13557.9	10322.6	14894.3	11077.6	14471.5	13611.7	13963.6	8328.28	16001	14797
8.59_849.6468m/z	14631	9803.79	20168.2	13771.6	7637.83	12913.1	9906.78	11707.5	13144.2	5348.62	11655	8165.55	6072.18	7861.08	15502.2	8961.03	10959.4	8929.65	7719.37	6818.02	11261.8	16289.9	15781.1	16219.8	17938.9	11460.3	11097.6	5465.19	3098.22	4100.96	14107	7151.97	5786.77	9799.21	9182.05	16274.2	4638.43	7968.27	6322.72	14750	11962.4	8391.51	16921.9	13128.9	7288.49	6862.48	7762.26	1595.4	13986.7
8.59_983.6219m/z	10204.9	10787.8	17082.6	15401.4	10863.9	18637.8	19353	10662.9	16546.7	8537.46	11622.2	8269.14	11450	10080.6	10630.9	12821	11745.9	11355.9	10267.5	6788.17	7335.41	10544.1	9802.99	8840.18	11878.8	9254.33	10176.8	4385.47	7623.34	5897.03	12742.8	18030.7	9180.9	10058.7	9434.98	12282.9	9912.8	10142.6	12721.6	8029.17	14222.5	15184.6	11216.9	16200.4	11936.7	12628.5	10610.7	10433.6	13461.3
8.60_1051.6081m/z	9552.89	4722.55	8666.43	3770.16	6941.09	8497.09	11512	7269.31	10644.6	6463.14	5586.35	6758.24	9548.78	10119.6	7183.99	6466.25	5914.77	7504.73	5940.1	7808.26	5609.34	9801.21	5376.33	13158.8	6347.65	7334.3	8290.36	8394.76	7899.86	4865.63	7743.68	11309.9	6388.86	10064.2	9723.39	9476.15	7804.21	9429.38	9321.24	13061.7	6847.01	3571.71	6343.35	6597.42	5303.09	4033.23	7082.22	4433.16	6375.17
8.64_886.6567m/z	10385.3	10847.2	20485.7	10579.7	18122.5	28475.6	28267.1	31074.8	23111.4	19741.8	16526.2	16562.2	28565.3	12628.3	13783.8	26954.2	8253.69	15312.9	6389.18	11885	23580.3	23808.4	18609.6	20991	23302.7	20687.4	19115.7	11900.6	9494.07	15601	12830	18456.3	16191.1	33400.1	17313.1	17086.8	18190	27982.7	6120.02	26321.3	33451.1	15647.9	13719.1	20042.5	14252.3	12227.3	5618.77	5008.38	12507.3
8.67_841.6253m/z	3662.49	4558.91	2202.45	2971.59	1524.11	3658.55	2099.5	4665.35	7632.55	13491.5	10705.4	14540.3	25237.5	5036.86	6016.85	7369.17	5078.74	3233.08	1683.77	3852.6	8801.31	11757.9	8478.69	10526.3	3534.46	2460.23	19674.3	11500.9	8168.53	4461.11	5105.29	8008.9	4277.16	5468.17	3138.08	902.653	8017.75	8933.43	11029	5273.91	15148.9	12544.4	6629.71	9561.26	7600.97	2362.5	3453.93	4449.2	5585.14
8.68_713.6191m/z	75027	65139.2	45308.2	45084.2	81034.3	43431.5	64147.3	55714.2	65708.2	65471.3	53009.1	70944.3	60769.3	54404.4	51942.3	54615.5	55208.8	54684.8	74093.5	68731	67701.8	69321.3	60844.3	46427	57234.6	68054.3	53379.7	68438.2	71533.6	63973.4	59789.1	54311	62063.7	56872	43049.9	60706.9	61963	60377	70263.6	42589	50381.9	56150.7	29742.2	61723.9	70033.2	60038	52566.8	65393.6	75544.2
8.70_680.5747m/z	92388.3	114699	143606	169192	179782	164505	99946	99995.2	81365.4	157282	92099.8	126264	52686	76418.6	134953	114804	80280.5	92424.3	134682	139111	96006.9	62610	94577.1	56340.2	181756	137355	85845.7	127977	141183	100675	118637	175723	56924.3	127187	91531	116503	57893.6	101284	129032	61999.9	96845.9	189359	125164	62346	83640.2	40561	116921	92194.8	132015
8.71_677.5689m/z	2744.94	10848.7	24937.1	50110.9	62747.4	31381.1	8177.86	1911.26	1381.11	3586.76	5661.91	9238.75	3102.3	1051.71	4333.9	2835.61	3888.02	6597.36	11219.1	9047.97	8359.86	2036.3	10445.1	1949.69	12515.7	14541.5	4626.93	13257.9	4622.53	6399.38	16811.7	23046	19325.9	27787.5	11532	3979.65	1128.35	5181.68	8203.17	6278.79	6999.4	7800.85	4843.08	4351.05	4358.72	5369.63	4760.16	3157.24	10913.9
8.72_140.0102m/z	1438.32	894.299	959.836	865.268	2078.13	841.934	1218.25	2733.57	1845.32	2134.63	956.312	772.027	1838.52	2308.56	4278.11	3440.68	2906.74	2999.75	2342.94	1388.61	1883.9	2875.33	1768.7	2568.37	2513.69	2326.23	1686.6	791.761	1329.5	1007.41	1960.65	1020.88	1045.12	1779.36	1877.35	2362.05	1317.1	1859.95	1661.45	1300.4	1505.38	2362.06	2697.21	3317.2	3292.02	1264.27	985.798	2119.52	1485.43
8.72_654.5591m/z	30630.4	75016.4	75147	90751.6	114371	58057.4	44786.5	43041.4	29891.8	89401.2	45331.8	54409.2	20609.6	11119.7	47265.4	114934	39650.6	58663.9	67368.2	87901.1	41826.6	17717.8	30694.8	23518.1	102448	83035.7	40352.3	97020.2	64712.6	43629.4	64106.8	73505.4	32790.4	59700	59442.9	36733.6	17725.4	108563	96131.1	66228.2	64966.9	96354.1	59774.7	29327.3	27812.1	40130.2	61346.3	28446	62362.2
8.72_664.5878m/z	83420.5	175621	214483	216909	212374	145726	94449.1	96797.1	90490.4	181245	126015	147444	69762.9	34377.3	129247	234347	106239	141591	171946	193674	145867	59105.2	95967.7	77530.8	234452	213653	126047	249915	189109	178436	131340	192991	81602.8	157360	143486	80651.1	54190.3	235294	184605	164243	144131	215385	140524	96044.1	71313.8	94852.9	151890	98489.9	163130
8.72_763.5777m/z	8867.26	7839.26	10692.3	7554.16	9857.83	5589.83	10207.4	12474.1	11514.4	9863.82	9543.76	11036.1	14363.6	13655.8	6415.07	8152.14	10348.7	7485.91	8760.23	8713.85	7542.73	10601.1	9484.68	10229.2	11736.2	10416.8	7405.73	10777.8	10520	12817.7	7268.39	13183.1	8726.99	8674.3	13228.8	14071.8	4670.6	11495.2	9706.93	12045	9051.69	15069.9	10765.7	11920.3	7720.67	10226.4	10529.7	8965.73	6274.38
8.72_832.5719m/z	20079	31510	33598.2	29118.7	38736.8	27234.1	19718.3	20084.2	20948.1	33262.8	28268.6	33442	21219.1	16124.7	36343.4	50522.5	29492.8	37856.3	45369	49685.3	31023.5	18974.8	22530.5	19564.7	40291.3	41910.6	25062.8	39997.2	34150.5	24572	29106.6	30961.4	17175.2	26918	31711.5	17718.1	10771.6	44437.7	42292.8	36706.9	36583.1	44841.6	36529	32160.4	28109.9	29378.6	35130	18721.2	42607.3
8.73_877.6880m/z	49989.2	38517.4	51722.2	32024.8	38168.1	47182.2	50014.9	41149.5	53241.4	45854.7	41087	40093.6	40156.8	48450	38339.7	35655.1	45879.4	48044.2	34395.3	74226	91460.6	72198.9	56072.7	58739.6	28951.8	35691.3	39492	45354.5	47278.6	54463.4	42557.8	59162.8	42979.2	47323.9	50686.6	46996.8	56240.1	43686.1	47911.6	67105.9	54139.7	35691	30575.9	49111.1	43916.4	59218.8	42610.6	67852.7	56381.5
8.79_871.6898m/z	56126.1	47135.7	80962.1	67183.7	37436	91889.2	54959.4	79668	75555.5	69831.9	69347.7	59194.3	73944.7	84021.7	79178.6	58484.9	65269.2	71998.1	53151.9	51961.6	72180.6	58223.7	87488.8	67273.8	46749	69624.5	62318.7	66797.9	74495.1	88064.8	47100.4	78659.2	44313.9	88763.1	49659.6	96952.1	62569.2	43930.5	53138	49967.2	53117.1	51384.5	78710.1	113304	70617.5	55171.7	60367.1	67707.7	67842
8.89_1018.7408m/z	14807.7	14196	46049.9	26775.4	32680.5	35286.1	39240.3	26175.6	59100.3	52698.6	41396.5	31703.3	41339	44621.8	48224.2	18418	37866.3	42346.6	46229.6	22103.7	29570.3	37035.4	54814.7	48009.6	30307.7	22077.5	37659.3	31742.7	41350.9	66638.2	33174.1	35006.3	39799.8	52723.3	46500	53237.4	25621.8	41510.4	49753.9	50259.1	32124.4	26744.3	22912.1	47690.1	44155	25009.5	27429	27916.2	16834.6
8.89_984.7413m/z	9384.42	12198.7	22571.3	19268.5	6218.45	29188.1	8806.92	20664.4	17048	6943.36	10884.8	13147.3	7128.3	6988.63	10902.5	13176.7	3148.63	6796.98	3214.46	3065.45	9243.74	9725.15	5857.68	8198.55	4410.28	3478.29	2360.95	5485.51	8064.18	8957.17	10939.9	13509.3	11363.1	13272.2	13904.1	25262.4	16088	13299.4	9635.38	14245.6	4927.74	7099.15	9549.3	10408.2	5648.06	9551.75	5567.48	8131.91	7583.95
8.91_668.5749m/z	21728.7	58817.7	60733.3	68939.8	42870	34811.4	38085.8	23528.2	16610.4	39159.8	33404.8	39735.5	12375.1	9721.31	34872.9	55936	27914.5	29888.5	28348.6	56967.1	39659.5	9017.18	23513.9	13394.7	82759.3	57016.4	30885.4	71462.1	55984.2	22892.4	54034.9	44160.9	20176.9	62389.7	36157	20489.6	5183.11	51190.7	48007.9	22653.7	15706.1	60147.6	50883.2	30265.8	22441	14611	37461.3	27508.6	26025.2
8.91_691.5759m/z	11171.5	31294.9	20998.7	26686	17912.2	24462.5	18004.9	16218.2	15313.9	24886.7	19749.3	19007	13081.3	13437.2	16196	24974.9	16429.1	15812.5	14074.9	15747.5	18924.2	7218.7	13417.1	10626.2	25355.9	29255.8	20054.9	22838.3	20176.6	16012.6	24829.5	29395.6	14768.4	27957.8	21302.8	12115.8	14800.9	21412	16687.8	9474.11	11514.6	25110.5	19669	13353.5	16796	10459.6	18959.1	12992.4	14711
8.92_678.6034m/z	104539	193232	242352	247574	141735	174938	128458	107130	70704.5	171945	155723	138405	65282.9	35077.9	146053	218589	136527	129242	118397	203399	158734	58583	141313	82755.4	312762	259809	152795	278455	216879	198686	180546	197840	67040.3	183363	140145	91188.8	43207.9	184906	187331	116978	75579.8	202762	182280	133023	87126	75384.3	185862	125757	135568
9.00_914.6826m/z	6210.6	12874	21045.5	14474.8	17770.8	20357.5	21725.3	15927.8	13120.1	16756.2	19053.8	14619.5	23832.2	10688.4	7589.27	25435.8	12657.6	23260.8	12457.4	13476.7	14939.5	15395.4	8903.55	18590.7	15136.7	20839.4	16822.9	9747.87	16046.9	13941.2	12268.9	15702.6	21594	27850.1	16002.7	6908.81	10920	18666.1	11288.3	33469.1	16127	7842.1	11669.5	29824.9	18907.2	25570.8	6902.85	6543.61	17617.4
9.04_705.6013m/z	216904	384958	367547	349536	392156	372422	245537	283024	262474	447246	305478	327746	221199	172027	338638	383880	318409	308768	382220	335941	294199	172589	294914	186357	425802	427431	274216	423165	372394	339826	406818	409830	163666	374134	269105	335053	221938	431493	361521	283996	374383	429706	319176	213327	254516	242949	409935	315868	354912
9.05_698.6290m/z	28017.2	15221.3	19641	30951.1	14421.9	16930.9	54482.1	29605	28056.6	12362.5	40457.2	25765.8	29345	16150.4	12098.4	27154.1	34803.6	19277.9	8382.43	31641.7	43478.9	13557.4	38746.8	28094.5	19193	18635	31888.9	48581.2	23828.4	38020.2	39905.5	13077.2	15327.8	26581.6	27749.1	21109.6	12288.1	12365.8	16780.9	19504.5	13526.4	77365.7	24624.9	55262.6	18317.6	21487.9	23232.3	20627.8	22584.7
9.07_1011.8704m/z	25942.8	24352.4	20572.2	15836.5	19217.3	14854.7	22409.7	20232.8	27066.9	18428.8	19033.3	17989	20473	21987	20834.9	21803.8	20249.6	16843.5	20789.7	22727.6	22057.2	22515.2	17276.3	18174.2	19215.9	23733.8	30136.1	15434.8	17652.7	15889.1	27680.5	13295.7	28139.9	23294.6	20406.6	27256.2	21968	17191.9	17310.3	18735.1	13126	16575.2	23346.2	16926.8	24471.7	20638.8	15280.5	20116.4	21970.2
9.11_692.6190m/z	476177	834969	944347	727341	701519	781367	486977	440834	533544	827617	554999	647976	409124	271320	627696	1.15571e+06	582763	875359	725075	782983	613696	362276	575731	439953	1.04281e+06	1.01687e+06	636120	1.01218e+06	784852	732552	790515	898438	373876	857124	590976	445843	277542	1.11356e+06	849900	936499	736787	872515	688615	571331	449973	542677	717113	483667	836512
9.11_709.6091m/z	49142.5	74368.8	88601.7	67344.8	55119.8	78774	46392.1	42191.5	51966.4	80052.2	53293.1	59591.6	37126.8	20488.4	57881.8	109238	64207.3	79677.9	60733.5	66953.9	63465.8	38610.7	56545.1	37880.8	100186	100811	61184.3	91374.9	65177.2	66051.7	79794.3	90904.8	41274.4	86211.5	49066.5	34788.2	23139.6	108622	75302.1	86971	66099.8	83309.5	59218.6	61320.4	40976.8	49168.1	69631.9	41208.2	75184.9
9.11_731.6298m/z	18670.8	49315.4	67335.7	52079.6	31619.8	57132.7	29866	34177.6	29154.6	51449.2	33212.5	45935.9	22628.9	11978	46435.9	88766.1	34122	49761.1	45561.9	53563.2	40251.8	19010.1	39202.3	26407.7	72366.3	64938.5	27905.6	66933.1	51353.4	44696.7	46411.5	50345	18227.5	73996.3	41076.4	28603.8	15002	88748.7	50620	65363.1	57918.4	64318	46663.5	36367.6	29370.5	29195.8	49240.7	34116.2	53356.2
9.11_786.6280m/z	42414.9	85884.1	123066	86899.9	59375.2	94328.3	44365.7	42781.2	48489.1	87103	58670.4	68985.7	41885.4	17125.1	72592	147210	65574.1	100423	82371.7	105700	79881.5	30818	74544.3	50317.4	125594	105843	62145.6	108501	83955.9	80749.8	77803.2	110864	35492.2	98691.3	56030.8	44330.2	21105.7	125508	83929.2	117295	76453	102135	83916	65245.3	47783.7	60247.3	87536.7	64240.6	102535
9.11_860.6004m/z	59204	104431	135241	97184.7	84380.9	112919	59819.2	59692.7	67448.8	99070	70429.3	82243.8	61332.1	37667.3	89690.6	149049	78013.6	103910	86900.3	83630.7	76455.2	52133.6	76730.1	61720	127780	139092	82767.6	130021	95374.8	98018.2	90060.8	120593	48211.4	123740	76913.3	57113.4	34726.2	139919	108283	119586	104304	108829	88964.9	78219.2	57748	64905.2	94712.5	63667.2	98712.7
9.11_960.7426m/z	23017.4	35880.2	33457.2	39643.8	24434.2	50771.7	23214.8	41711.5	41874.7	20491.8	34010.6	28700.6	18537.5	42390.1	54394.2	42299.9	28138.7	41216.3	17457.4	24463.4	35500	40919.6	32426	26865.7	21708	24061.7	27147.2	42701.4	36534.2	48398.3	34580.5	27752.3	31156	18541.9	28839.5	33860.9	29685.8	35803.3	18229.8	27799.8	26117.9	21774	29861.5	49027	35078.7	28731.9	32185.5	57346.3	29772.1
9.12_555.4787m/z	7912.35	9409.36	23246.4	8530.04	9359.65	3351.52	3125.39	2686.79	2896.59	1335.68	2530.56	1397.06	750.833	7153.32	7801.63	1526.58	984.146	3308.76	3315.12	1433.25	5425.2	8093.05	5123.69	5228.78	8311.21	8035.07	6138.85	5888.44	2047.89	2286.57	5440.88	4175.88	7769.05	1193.05	1454.41	546.337	1798.55	2163.28	4561.23	7240.42	4074.03	5600.17	2394.62	1868.86	2849.6	2193.04	2502.55	2574.78	4277.09
9.21_768.6715m/z	996.809	0.985404	216.804	4160.03	242.759	283.848	148.513	396.09	377.195	978.636	811.817	1624.11	289.499	859.088	239.017	552.997	754.829	538.246	168.812	368.354	2711.68	643.933	5850.63	391.903	609.415	332.154	308.357	277.642	333.56	158.644	1128.77	381.864	1027.04	577.08	252.19	652.356	511.868	656.956	1155.56	378.409	555.9	442.857	522.604	4204.57	336.837	1959.16	391.367	257.113	447.122
9.21_977.7829n	14884.7	15430.5	21083	12998.5	7593.79	30417.1	14272.2	22464.6	26075.8	15883.8	21130.4	17814.8	13761.3	20864.9	18079.3	23073.5	21476.4	22313.9	15012.4	20498.4	21807.5	18132.9	20519.8	19651.6	14987.2	14555.4	21947.6	22517.5	24793.8	22902.6	19066.9	12550.7	13576.6	17135.8	13091.3	12780.7	22122.2	19003.2	13462.7	19538.9	22997.8	14327.5	16821.2	30654.6	18974.8	23191.4	20251.5	28882.2	20227
9.23_145.9316m/z	2178.39	1700.54	2067.55	1783.21	2805.01	2228.9	3113.23	2926.64	3058.28	3280.06	2426.18	1904.69	2194.14	2575.76	1639.78	2838.12	2236.63	1507.06	1454.92	2285.55	2150.99	3070.42	2272.47	2730.24	2898.52	2552.99	3512	1996.36	2314.76	1692.12	2720.31	2146.67	2626.02	2714.66	2777.38	1622.72	3125.29	2046.66	3555.57	1636.17	2043.96	1899.13	2060.59	1235.3	2091.86	1880.25	1626.39	1719.13	1844.13
9.23_712.6446m/z	162595	139032	89168.2	120509	121307	120293	207020	76646.6	136065	153004	170212	126816	151355	106372	109467	192334	204436	205717	132976	194348	297486	124911	231681	200487	189563	224119	174488	288610	185068	274433	242879	99785.5	129472	155194	147142	135836	99936	122554	113927	162303	181254	306255	124450	198812	129986	253065	155716	158021	187113
9.29_759.5962m/z	121221	291765	371194	233948	335377	222169	243849	258390	302872	231232	419810	489777	375901	405400	469295	410555	306178	445941	318492	446912	522441	528621	303822	404020	422316	616935	340160	355036	35504.3	350815	233647	188816	286438	227228	327127	631189	416357	220660	424146	440391	282215	149567	428022	399405	305490	69956	523634	408519	342496
9.42_988.7742m/z	79776.9	83788.1	127902	78100.5	36301.6	109659	65940.1	127016	136444	76681.3	106877	67775.3	33029.7	83789.5	111610	100643	69876.6	105125	79775.9	59386	120686	92497.1	119735	88730.7	80703.7	64482.2	57037.6	68903.6	74830.1	86917.6	114888	82273.5	58560.5	50096.6	69441.1	107192	138692	127954	53937.6	73498.4	60696.1	50975	82212.6	116971	98086	102463	77471.5	123726	95448.3
9.43_1014.7887m/z	21955.9	15194.9	36006.1	23039	21238.2	32897.6	14528.6	29694.4	32020.2	19398.8	29312	22946.9	14729.3	43458.8	35456.4	26814.4	21399.5	28067.8	13310.3	15249.5	36993.7	31802.4	46165.2	29695.3	17848.5	17658.8	19446.7	18648.3	22833.5	32314.1	28997.7	19275.8	17619.3	20466	15935.4	35189.2	31079	23612.3	18944.8	25626.1	34886.6	27226.9	27680.2	40957.7	20568.1	22032.8	21401.6	29598.5	20747
9.44_707.6123m/z	523822	617798	420538	391403	517957	504065	466218	422612	580107	668713	493495	539057	596597	394055	567421	618980	654798	606780	645638	549096	588100	429168	597899	456004	632013	780804	590533	800364	657348	668658	536954	459005	439382	547406	459298	521435	524036	615744	606481	526817	603268	614888	561439	485811	549113	604447	702748	662891	638653
9.44_711.6248m/z	482739	508875	344706	338385	428821	384953	375628	350268	443043	505301	385810	445779	463768	307505	437508	519852	571563	528998	559616	511817	500242	358883	492156	339825	541168	616407	469654	625035	498109	544892	473168	361979	330860	467401	386419	379805	413878	534742	478801	420738	485085	508136	445623	427773	431289	519730	596353	553944	538152
9.44_808.6126m/z	386474	438093	292874	283810	388232	383525	346856	305915	427763	484272	346260	413436	427913	284000	429407	471732	492160	504585	502643	442873	482603	338217	471354	395062	543465	638596	458200	710782	540087	538967	359971	329882	315476	398251	347625	366345	399073	506152	426358	382887	457846	443190	425625	375642	407770	470321	541872	505322	504328
9.45_746.6438m/z	3594.37	2422.88	1398.35	7884.57	221.104	2082.2	1304.75	2619.69	3790.97	2961.35	3014.85	1806.19	3980.09	3818.6	2058.33	1396.11	5135.62	1726.55	2384.39	842.83	3578.37	1409.1	2684.19	1172.31	1281.73	2179.18	2223.38	1810.23	2914.21	1265.8	908.383	1806.64	9956.38	1457.19	3339.47	3225.03	1843.64	2407.38	442.827	1229.47	2102.99	1249.88	3010.04	7472.67	1429.58	3834.36	2358.47	1284.93	1536.14
9.45_836.5974m/z	45814.7	35342.8	34793	25548.1	30813.6	24957.3	28618.6	12986.2	40488.1	33440	29946	47936.7	40540.1	32524.1	23770.4	42374.9	37044.4	32596	31834.6	31528.2	32910	27641.3	38462.4	21703	33391.2	42938.6	34390.8	43243.8	37884.7	39687	37816.1	32050.2	30977.1	30841.2	17347	33638.4	27467.1	33644.8	45597.4	35507.2	31481.9	44600.7	28042.2	43400.2	27366.2	40691.9	38673.9	28331	30343.8
9.80_834.7092m/z	4223.66	3792.19	4846.06	7033.31	4747.77	3101.9	7311.4	3273.11	5730.43	10350.3	2882.03	3668.37	4133.31	4027.79	3042.97	5042.07	6292.79	6453.34	3943.18	4345.45	4540.85	3414.67	2672.44	3829.26	2239.6	4379.51	5436.05	4188.18	3207.79	3369.01	3808.26	3932.13	6779.03	5419.37	3630.78	4779.92	7021.38	5116.4	1137.64	3881.27	3848.11	8876.65	5457.71	5604.52	3667.03	4704.51	2431.94	5525.33	4803.15
[truncated: 41 more columns]
