# Supplementary material for: Lipidomic profiling reveals distinct differences in plasma lipid composition in overweight or obese adolescent students
Source: Research Square preprint supplement (doi:10.21203/rs.3.rs-33013/v3), 2021-03-09
Supplement: Supplementary file 6 [file f1900551cabbc8705c44d2db.xls]

## Sheet: obesity-A_control-diff-heatmap-
	overweight_17	overweight_30	overweight_79	overweight_73	overweight_76	overweight_36	overweight_92	overweight_99	overweight_33	control_85	overweight_23	control_88	overweight_96	overweight_46	overweight_63	control_48	overweight_43	control_29	overweight_56	overweight_10	overweight_20	control_81	control_58	overweight_102	control_42	overweight_40	overweight_83	overweight_89	control_95	control_98	control_13	control_15	control_32	control_19	control_78	control_101	control_35	control_52	overweight_53	control_45	control_12	control_72	control_62	control_9	control_39	control_68	control_6	control_25	control_75
7.45_836.5790m/z	-1.59736	-1.47883	-1.29847	-2.09706	-0.88864	-2.37316	-1.05152	-0.515056	1.20872	0.08961	0.497551	-0.684945	-0.926932	0.211399	-0.770865	1.48386	-0.532276	0.481848	-1.04043	0.56201	0.000567124	0.255812	-0.663228	-0.48386	0.186841	-0.617945	0.757576	0.435678	0.377903	0.287181	1.09178	-0.269164	-1.57157	1.42436	1.3674	1.38576	0.824261	0.755298	0.851508	1.09348	2.35554	1.5187	-0.391342	0.147834	-0.25722	-0.757378	-0.203397	1.82553	0.73026
7.52_812.5802m/z	-1.65984	-0.0512339	-0.333726	-2.28409	-0.27322	-1.96523	-1.49817	-1.05431	0.716936	-0.24105	-0.22619	-2.60328	-0.936857	-0.327922	0.304807	0.460183	0.128113	0.189272	-0.34628	-0.969372	0.0586737	1.02258	0.933619	0.578241	1.24035	1.2648	0.417406	0.686564	1.37605	-0.331732	0.365543	-1.37631	-0.464152	1.76223	0.883413	0.984166	1.47941	0.637749	1.03338	0.358006	0.531703	1.03929	-1.00912	-0.337774	0.0426704	-0.18605	0.156241	1.00577	1.0693
8.73_894.6633m/z	-0.972564	-1.49274	1.83365	-1.37673	0.515884	-2.14414	0.522208	-0.327532	-1.15351	0.695142	-2.79837	-1.09141	-0.348542	-0.231403	-0.470974	0.746906	-0.849112	1.07381	0.196953	0.37117	-0.404185	1.23624	0.789705	0.599832	0.0205486	0.482192	1.18137	0.573162	0.764381	-0.0596233	0.859094	-0.258701	-0.695038	0.589909	1.55	-0.294183	-0.99395	0.478467	-0.594276	-0.158162	1.13438	1.85165	-0.161562	-0.850871	-0.715671	-0.209043	1.61532	1.3976	1.17043
7.81_862.5960m/z	-0.0177311	-2.33598	0.991735	-0.723389	-1.53262	-1.32069	-1.10001	-0.0922232	-0.0867503	-1.00804	-0.695984	-0.333614	-1.04653	-0.195839	-1.92105	0.146252	0.138474	0.996947	0.054261	-0.483257	-0.639178	0.806392	0.776436	0.0647569	0.438085	-0.0767016	1.38273	0.347848	0.0107228	0.337161	-0.401265	-1.14038	-1.44658	1.22182	0.784986	1.70061	-0.331573	-0.303056	0.32882	0.663725	1.69325	1.44266	0.818222	-0.228954	-0.571029	-0.0678358	1.16018	2.39161	0.407353
7.90_864.6116m/z	-0.20258	-1.30738	1.34935	-1.11844	-0.501609	-1.79287	-1.64744	-0.684019	0.121869	-2.14785	-1.25329	-0.764931	-1.34036	0.624312	-1.13087	0.200508	0.497482	1.47283	0.039318	0.146194	-0.855531	0.257424	1.32526	0.194631	1.01484	0.473704	0.44426	-0.795191	-0.519033	0.765274	-0.432777	-0.0722089	-0.506294	0.915849	1.19597	1.24289	0.209614	-0.00237491	-0.280065	1.02102	2.26015	1.76259	0.336193	-1.359	-1.50811	-0.270043	1.27104	2.21838	0.142557
8.34_892.6445m/z	-1.71427	-1.5631	1.49303	-0.378281	-0.418661	-1.30795	-0.750886	-0.906831	0.299688	-0.410676	-1.02969	-1.11737	-1.37253	0.260505	-0.0284599	-0.304002	0.408435	1.91646	-0.0611475	0.105977	-0.503715	0.633325	1.56882	0.419142	0.880716	0.399962	1.29433	-0.363165	-0.713559	-0.315709	-0.235115	-0.27684	-0.746884	-0.484952	1.18142	1.03972	0.678676	0.876585	-0.348287	0.794838	0.923241	1.12822	0.339985	-1.7842	-1.13989	-0.398805	1.35842	2.41792	1.14224
8.12_960.6059m/z	-0.422307	-0.0209612	1.38905	-0.232519	-2.23126	-0.697665	-1.09885	-1.02134	-0.17705	-0.970835	-1.31001	0.414883	-0.362866	1.1827	-0.224579	0.699299	-0.0439324	0.906254	-0.32073	0.154096	0.81844	0.0982569	0.390424	-0.804603	1.40803	0.308168	-1.30248	-0.683101	-1.50974	-0.166915	0.454362	0.110777	0.675987	1.5419	0.508055	1.25199	0.500041	0.795492	0.446395	1.91885	1.36309	-0.840369	-0.0358626	-0.423734	-0.359656	-0.164517	0.743664	1.43683	0.353255
5.86_820.5702m/z	-0.960597	-0.0783424	-0.750259	-0.631698	-1.57502	-2.57973	-3.22427	-0.430385	1.7826	-0.849311	-0.130576	0.6758	-0.569474	1.06558	1.21082	1.45014	-0.224672	0.511698	0.064675	0.164617	-0.342176	0.0593661	1.12796	-0.657107	0.587764	0.294753	0.525331	-0.0995065	-1.11645	0.489245	1.86995	-0.59567	0.412257	1.71074	1.23178	0.821227	0.822288	0.423924	0.433594	0.89232	-0.805305	1.05328	-0.143052	-1.22713	0.821286	0.0218856	-0.667157	0.298721	-0.966325
7.49_718.5386m/z	-1.19168	-1.71645	-0.891909	-0.547917	-0.549387	-3.08053	-1.28674	-0.973282	1.91324	-0.407443	0.26192	-0.0197269	-0.940032	0.991091	0.0643819	0.388581	-0.837523	0.311103	0.588725	0.309373	1.23733	0.141113	-0.0746809	-0.249643	-0.646048	-0.769408	0.00498745	-0.712686	-1.35396	0.171756	1.99671	0.749086	1.18485	2.16259	0.6219	0.279333	1.22635	0.416005	0.681857	1.51077	1.1806	0.834362	-0.477769	-1.15835	0.341793	0.26606	-0.561025	0.988424	1.29324
7.98_1261.8133m/z	-1.26577	-0.439969	-1.42963	-1.22669	-1.83523	-0.968534	-0.749371	-0.686365	-0.38665	-0.181902	-1.06159	-1.27765	-0.863088	1.25015	0.735537	0.620977	-0.0596479	1.07112	0.0931966	0.678099	0.875307	-0.449834	-0.383153	-1.12516	0.688999	-1.59244	-0.595027	-0.924872	0.484676	0.541012	1.25838	0.776384	2.40707	2.55154	-0.2993	1.66822	0.107599	0.279324	-0.608204	-0.304133	0.903391	-0.355457	1.50532	-0.4338	0.410047	0.188494	0.0501472	0.710115	0.583157
8.53_840.6541m/z	-0.369107	-0.388542	-1.66293	-0.232156	0.0822019	-0.130959	-0.144584	-0.217161	-0.905015	-2.24362	-3.10152	-0.685215	-1.27262	-0.251119	0.926844	0.601328	-1.00562	1.1993	0.196673	0.682897	1.07094	0.829108	0.0185421	-0.145624	0.652901	-0.871376	-1.24707	-0.436023	0.264953	0.530836	1.63807	-1.3541	0.35766	1.79547	1.30521	0.340054	0.704307	0.429627	0.0266276	-0.671261	1.19115	0.821028	-0.371398	0.608882	0.0104079	0.114553	-0.0473406	1.35352	0.295147
8.32_852.6563m/z	-0.528455	-0.245193	-0.859753	0.13159	-1.3752	-1.37487	0.0192356	-0.191034	-1.93245	-0.257804	-0.213839	-1.6756	-2.29234	-0.523028	0.425301	1.46842	-1.33044	0.90708	0.258645	2.67992	1.16938	0.650508	0.670833	0.459737	0.468243	-1.01098	-1.50077	-0.806091	-1.92343	0.269912	1.4272	0.207687	0.269318	2.07505	0.691541	0.00560447	0.937323	-0.0879233	-0.323829	-0.260019	0.324145	0.00486091	0.653558	-0.127707	0.69152	-0.172129	-0.0679841	1.27011	1.76432
8.66_854.6716m/z	-0.6591	0.0279324	-0.6467	-0.510942	-1.51107	-1.27658	0.0768863	-0.911076	-0.653188	-1.379	-0.216564	-1.28583	-2.38721	-0.4935	0.514152	1.31882	-0.511742	1.73486	0.705133	2.51283	0.556527	0.423942	1.19005	0.666564	1.22229	-0.996314	-1.21767	-0.870398	-1.79671	0.255577	1.02453	0.902699	0.78846	1.3446	0.898734	-0.260094	1.12254	-0.270144	-0.15994	0.0873893	0.114483	0.0141628	0.153924	-0.137078	0.467646	0.341666	0.236537	1.30935	1.40402
8.47_873.6798m/z	-1.37289	0.0827248	-1.74553	0.153872	0.308554	-0.748445	-1.17211	-3.18973	-1.28899	-0.440316	-2.09415	-0.288582	-0.647989	-0.325749	0.0188618	0.379591	-0.778007	1.2032	0.344018	2.13538	0.732717	0.791483	1.65236	0.449734	0.898037	-0.302191	-0.597187	-1.02557	-1.42541	0.889722	0.983302	0.134416	0.562993	0.310559	1.088	0.803715	0.705782	-0.648345	0.842964	0.252332	0.937424	1.01587	-0.878668	-2.51587	0.302244	-0.253354	-0.17516	0.697375	0.646884
5.73_1450.1252m/z	-2.25632	-0.74446	-1.33039	-1.10637	-0.820155	-2.29755	-2.27268	-1.01588	-0.126434	-0.558495	-0.389411	-0.949506	-0.787442	0.44219	-0.0654139	0.205286	-0.239935	0.312598	-0.312028	1.08848	0.600325	-0.00325097	0.39431	0.343312	-0.000799801	0.290684	-0.70151	-0.344582	0.214047	0.553312	1.89042	-0.499988	0.801637	2.60885	1.05241	2.46383	0.766424	0.376955	0.636065	-0.0230515	1.98621	1.56561	-0.441106	-0.358983	-0.752194	-1.41253	-0.745527	0.217822	-0.328315
5.11_1271.7460m/z	-1.94296	-0.0808589	-0.931308	-1.04206	-0.458483	-2.23902	-1.395	-1.72095	-1.38704	-0.668277	-0.848634	-1.01954	-1.51167	0.456927	-0.369565	0.72568	0.336844	0.480601	-0.273357	0.612763	0.676225	0.401086	0.881531	0.144688	-0.439054	-0.488698	-1.59451	-1.49203	-0.335726	0.924555	1.27246	-0.27655	0.953869	2.29159	1.09877	1.88423	0.404839	0.525663	0.559348	1.2262	0.905739	1.243	0.272181	-1.43242	-0.189443	-0.727016	-0.0164223	0.71608	1.033
5.47_1068.6681m/z	-2.22227	-1.07093	-0.925514	-0.678382	-1.6462	-1.89957	-1.06622	-0.311239	-0.7282	-1.01921	-1.04937	-1.83539	-1.97999	0.286394	-0.646534	0.321416	-0.000865137	1.04669	0.680773	0.780449	0.851607	-0.0954738	0.307779	0.322325	-0.156691	-0.924317	-0.711869	-1.14596	0.349841	0.376046	1.0078	-0.968471	0.648941	2.04263	1.12101	1.97278	0.18819	0.511223	1.25192	1.29712	0.925938	1.72489	-0.000523274	-0.314388	0.137381	-1.2227	0.868414	0.833137	0.416716
8.39_1178.7769m/z	-1.85377	-0.367607	-0.532877	-0.518448	-1.15338	-1.761	-0.930501	0.0757258	-1.37098	-1.97368	-1.34058	-1.91094	-0.741926	-1.70683	-0.35649	0.880465	0.759965	1.02566	1.44501	0.625444	0.0949945	0.436	0.334999	-0.503834	-0.162816	-1.40997	-0.30329	-0.954784	0.0867024	1.00118	-0.120586	0.591324	0.470867	2.2539	1.1599	2.33197	0.448647	0.506771	1.08138	1.1544	0.195589	1.08875	0.651808	-0.650144	-0.11399	-1.16479	-0.322262	0.980935	1.14687
8.34_816.6125m/z	-1.58137	-1.08514	-0.950189	-1.45534	-1.35623	-2.10488	-0.198834	0.565912	-1.38534	-1.00003	-1.82706	-0.566957	-1.92308	-1.32596	-0.903827	1.2272	0.508641	1.37326	0.578071	1.03359	0.410284	0.753283	1.32174	1.41057	-0.0307889	0.206618	-0.123649	-0.518702	0.616444	0.363459	0.191158	-0.416126	0.0786393	1.90963	0.82619	1.39967	0.373505	1.13942	1.1957	-0.214053	0.422324	1.64222	0.307665	-1.74469	1.14606	0.146592	-0.704988	1.52662	0.689106
7.94_728.5584m/z	-1.02209	-0.878865	-0.829021	-0.196057	-0.994947	-1.49701	-1.41733	0.810347	-0.487767	-0.377597	-0.500651	-0.776615	-1.03424	-1.02571	-0.659119	0.515043	0.568574	1.34351	0.362946	-0.244095	0.32778	0.0882369	1.27833	0.677796	0.658679	-1.33342	-0.0534862	-0.0832018	0.0547786	1.18796	-0.0776601	-2.30388	-0.0712081	2.71401	0.235048	2.0868	0.218469	1.92288	1.69622	0.777379	0.491391	1.85389	0.175498	-1.63287	-0.559465	-1.20166	-0.700997	1.19558	0.0861829
7.94_788.5801m/z	-1.58408	-1.17351	-1.23611	-0.796504	-1.02466	-1.69846	-1.56189	0.41935	-0.881299	-1.02436	-1.32115	-1.38197	-1.07783	-1.3288	-0.543698	1.1142	1.28724	1.19835	1.21507	-0.284267	0.0298712	0.662719	0.975855	0.345929	1.13139	-0.349985	-0.108128	-0.357732	0.23011	0.743306	-0.0951672	-0.8431	-0.563421	2.6494	0.912316	1.82932	0.302715	1.6389	1.33667	0.538875	0.0915425	1.53943	0.0538029	-1.08754	0.494642	-1.20495	-0.409357	1.2956	0.77127
5.80_750.5296m/z	-0.285873	-1.45165	-0.302892	-1.37861	-0.919654	-0.467147	0.179504	0.873994	2.08834	1.63776	0.825904	1.72724	0.749965	0.91795	0.184763	-0.7852	-1.42002	0.278349	-0.582867	-0.805945	0.965201	-0.656373	-1.24271	-0.825174	-0.743215	-0.132967	-0.260963	0.564781	0.627521	-0.135063	1.29738	-0.514198	-0.150709	0.337774	0.340749	-0.173695	1.88891	0.347202	0.67112	1.64373	0.486826	-0.183918	-0.704401	0.654791	1.95159	1.59565	-1.35922	1.93594	-0.678318
7.70_561.4534m/z	-1.32068	-0.956695	-0.301288	-0.46349	-1.09508	-0.455499	1.28017	0.358097	1.67883	1.11117	1.15268	0.815544	0.162587	-1.05671	-0.739895	-0.514826	-1.5998	0.402502	-0.145788	-0.229075	-0.116483	0.312846	-1.18914	-0.423649	-0.363223	0.985755	1.16988	1.2794	1.20884	1.31316	1.37651	1.79062	-1.26149	1.41136	0.844625	1.12098	0.979805	0.582684	0.00241185	-0.460055	0.221761	0.818531	-0.587021	0.517236	0.252088	-0.222796	-0.393076	0.139044	0.0457932
7.48_882.5983m/z	-1.94998	0.354434	-1.19303	-0.215078	0.154531	-0.111812	-0.120619	-0.509488	0.470753	0.452871	-1.40452	-2.90803	-1.20706	0.17775	0.499792	0.569821	1.14888	-1.89379	-1.24395	0.901374	0.134339	-0.00700693	1.38586	0.367301	1.71954	0.660904	0.18783	-2.30291	0.123597	0.285053	0.0887173	-0.0765111	0.528317	0.243239	0.609285	0.0178697	1.2138	0.92569	0.914341	0.322456	-0.197284	1.1559	-2.18029	1.04793	0.223648	1.30873	0.411446	0.199683	1.38131
7.93_1010.5646m/z	-0.609832	-0.959254	-1.34123	0.0635093	-0.345006	1.22808	-0.800346	-0.818559	1.0172	0.349332	0.11886	1.02195	-0.0082414	0.0704708	0.532271	1.8558	-0.149847	-2.93478	-0.975215	1.59621	-1.63598	-0.654533	-1.26817	0.108762	1.31904	1.07147	0.846561	-1.23609	0.0307336	0.029443	-1.15504	0.476863	0.198734	-0.314419	0.38069	0.933586	1.16912	-0.0499445	0.122666	0.0957572	0.00860105	-0.46569	2.06518	1.06082	0.404124	0.861276	-0.535416	0.339272	0.533346
6.10_861.5490m/z	-1.03259	-1.48978	-0.947589	-0.926391	-0.754947	-0.501655	-0.532995	0.850154	0.241052	-1.04889	0.332534	0.839791	0.386436	0.374579	-0.85195	-1.65616	0.250318	0.459766	0.359185	-0.00855502	-0.989913	-0.339121	1.04818	1.8578	2.39728	-0.359005	-1.23682	-2.15229	-0.838948	-0.230424	0.758378	1.40233	1.04674	0.980086	0.708802	1.37603	1.62842	0.676384	0.224905	-2.33352	0.749139	1.57823	-0.504329	-0.264331	1.38112	0.778983	-0.241571	-0.973149	-0.298384
7.60_863.5637m/z	-0.276842	-2.00896	-0.7126	-2.16862	-0.714984	-0.327915	-0.69764	0.0586661	0.692866	-0.341544	0.736279	1.67603	0.171328	0.965619	-1.01565	-1.92282	-0.118029	-0.243063	-0.0657881	-1.05066	-0.791608	0.227921	1.03158	1.57148	1.93943	-0.0485334	-0.488233	-1.44244	-0.470591	-1.34735	0.249442	2.03051	0.897223	1.88501	0.836102	1.06699	1.75871	0.9657	0.870577	-0.729215	0.451398	0.627389	-0.840376	-0.284762	1.63915	0.866595	-0.964964	0.0226385	-0.550944
1.73_698.3190m/z	-3.08517	-2.56099	-1.11162	-0.539174	-0.652362	-0.416771	-0.239097	-0.477346	0.520412	-0.00393994	0.383499	-0.349094	-0.236277	0.96091	-0.17927	0.689314	1.05025	-0.331469	-0.791079	0.37958	-0.554854	0.194878	0.775358	0.740372	-0.633306	0.554643	-0.469232	-1.19492	-0.255295	0.261201	2.45496	1.17756	1.66708	0.929524	-0.406524	0.576129	0.47318	1.10738	0.620077	-0.680833	0.896796	1.0546	-0.276221	-0.256757	0.943085	0.974183	-2.17493	0.661765	0.663017
1.82_480.3095m/z	-1.56681	-1.80618	-0.811019	-1.37829	-1.37298	0.348599	0.1507	0.58921	2.12779	0.269942	0.537877	-0.558933	0.0619831	1.56624	-1.53038	-0.786638	0.277199	0.120017	0.921703	0.434201	-0.147357	-1.00694	0.691142	1.22799	-0.347884	0.0653325	-0.677992	-0.559188	0.728635	0.86411	2.17529	1.20456	1.73639	0.228022	-0.955048	1.21486	1.05365	0.227286	-0.267066	-1.79502	0.579975	0.163759	0.14001	0.409491	1.82581	1.1512	-0.698246	0.0687993	0.520653
5.96_903.5337m/z	-1.40907	-0.936965	-2.05872	-1.57484	-1.10904	-0.306374	-2.19023	-0.917137	0.560745	0.573607	1.38087	0.829224	0.140796	1.24624	0.930217	0.18529	-0.959091	-0.582594	-1.4807	1.10754	0.84307	-0.651148	-1.10051	0.0209066	-0.785023	0.330944	0.383283	-0.992182	-0.120612	0.875846	2.34243	1.15798	1.24501	0.697967	0.402568	1.08046	1.32718	1.19475	0.945384	0.109746	1.01383	-0.310304	0.522089	0.359581	1.19711	0.424638	0.16535	-1.65448	-0.0232197
5.95_835.5332m/z	-0.422615	-1.70325	-1.1018	-1.54298	-1.22802	-0.585588	-0.0768108	-0.297301	1.47308	0.652529	1.9376	1.71524	-0.28742	0.76839	-0.289704	-1.23566	-1.30602	-0.655399	-0.172174	-0.0403863	0.0147703	-0.361027	0.660392	1.01331	-0.0871872	-0.107647	0.465159	-0.59068	-0.511476	-1.18524	2.57312	2.22316	0.569261	0.80916	0.540764	0.918	2.25913	0.502064	1.48066	-0.0472215	0.145476	0.155116	-0.412109	0.188717	1.63117	0.945696	-0.628435	-1.18766	-0.337201
8.17_1643.2509m/z	-2.03128	-1.18098	-1.68963	-1.55625	-1.23714	-1.37373	-0.197092	-0.920312	1.1088	0.225789	1.87825	0.398846	0.633051	0.683424	0.406965	0.075711	-0.796128	-0.28206	-0.987919	0.508506	0.86191	-0.500566	-0.173907	0.750329	0.239976	0.61807	0.562952	-1.47073	-0.8142	0.131325	2.36577	1.25073	0.533329	1.83626	0.777078	1.11659	1.39522	0.195266	1.39086	-0.423553	0.9944	0.727853	0.744597	-0.605928	0.792553	0.470158	-0.48781	-0.416029	-0.00371542
7.69_1694.0862m/z	-2.39489	-1.82169	-2.9317	-0.556674	-1.69646	-0.448088	0.631404	-0.771925	2.19703	-0.150466	0.758812	1.03131	0.221763	0.74996	0.257586	0.650656	-0.492008	-0.88525	0.321192	-0.235692	0.569343	-1.17353	0.211904	-0.00903524	0.373538	1.0936	0.426818	-0.123374	-0.356872	0.770627	1.68501	1.33487	0.751571	0.96402	0.658599	0.229301	1.47692	0.841945	0.887473	-0.0393511	0.540905	0.162052	0.849654	0.175161	1.03573	0.957171	-0.70149	-1.25106	-0.000938596
7.70_1632.1217m/z	-2.18036	-1.57778	-2.77919	-0.875971	-2.81895	-0.146634	0.302485	-0.836141	1.87101	0.319313	1.09648	1.04943	0.335418	0.839461	0.691509	0.240897	-0.109378	-0.877663	-0.348031	-0.0234769	0.739791	-1.28159	0.273863	0.0431674	0.633837	1.02576	0.721085	0.136713	0.0492998	0.68676	1.3065	1.48101	0.56288	0.921374	0.466341	-0.0556912	1.29579	0.849085	0.983154	0.0358282	0.384807	0.546141	0.845181	0.0976377	0.8789	0.718844	-0.31929	-0.519717	-0.227827
7.70_1564.1395m/z	-1.99413	-1.66043	-2.24787	-0.950002	-2.16773	-0.308683	0.262643	-0.798856	2.49545	0.0863737	1.19584	1.11988	0.0579592	0.848622	0.617438	-0.0144856	-0.238678	-0.49065	-0.155954	-0.125693	0.730024	-1.14891	-0.0206032	-0.0906171	0.327155	1.07359	0.657719	0.0160199	-0.239709	0.632545	2.29792	1.59029	0.586478	1.07867	0.469761	-0.0571983	1.61752	0.736924	0.952139	0.109674	0.223711	0.470143	0.775776	0.160343	0.772085	0.66753	-0.400576	-0.933335	-0.308333
7.70_804.8182m/z	-1.73434	-1.61778	-1.98046	-1.11817	-1.96561	-0.42712	0.139394	-0.798403	2.49027	0.0668834	1.2534	0.985588	-0.00441037	0.923904	0.507909	0.0154932	-0.378283	-0.61514	-0.214081	-0.0903106	0.709117	-1.07059	-0.00932567	-0.209835	0.325714	1.19799	0.615525	-0.0825329	-0.307656	0.573809	2.80095	1.67837	0.536162	1.13377	0.424585	0.151391	1.63148	0.833244	0.943381	-0.047908	0.494925	0.573364	0.636927	0.150909	0.636557	0.515836	-0.489678	-0.968012	-0.317225
4.86_883.5334m/z	-1.78022	-2.24787	-0.532706	-1.00755	-0.0424762	-0.290661	-0.445222	-0.233437	0.441319	0.654863	2.06679	-1.21878	0.287212	1.22488	-0.143992	0.462176	-1.05026	-1.20489	0.718916	0.644617	0.316953	-0.552477	0.982392	0.93502	1.93057	-0.0886543	-1.79993	-1.32014	-0.0915129	-0.626352	1.57352	0.41265	0.884894	-0.180349	0.222645	1.02477	1.6807	0.179721	1.11047	0.005235	0.84305	0.971542	-0.331638	-0.163999	1.01801	0.591655	-1.10461	-1.31249	0.954963
5.24_859.5333m/z	-0.831532	-1.13442	-1.04406	-1.53195	-1.13922	-0.859807	-0.0474892	-1.60759	1.15912	0.812616	2.11873	0.426826	0.880448	0.177416	-0.298202	0.22963	-1.10217	-2.08667	-1.36528	-0.628008	1.9288	-0.271967	0.166367	0.301762	0.849841	1.23171	-0.709998	-1.09074	0.361517	-0.923164	1.89069	0.8748	1.88382	0.713152	0.822164	-0.0330013	2.06367	-0.316524	0.761695	0.760961	0.43107	-0.239262	-0.577602	0.340497	0.183953	0.994956	-1.25717	-0.260811	0.686386
4.46_881.5178m/z	-1.54612	-2.14281	0.0553959	-0.0570989	-1.03515	0.245856	-0.41272	-0.811648	0.410575	1.0617	1.26564	0.601223	-0.513118	0.0668859	-0.717878	-0.0745144	-2.31148	-0.617377	-1.0027	2.01678	0.059158	-1.28646	0.164464	0.354661	-0.566585	-0.684598	-0.012967	-1.88078	-1.50549	-0.179228	2.87143	0.2551	0.650168	0.213804	0.915038	0.695993	1.46198	-0.0416356	0.807078	0.30373	1.41162	-0.0282631	0.774169	0.031904	0.906842	0.648806	0.313242	-0.203726	1.24524
5.69_909.5484m/z	-1.12348	-2.3595	-0.688847	-0.416383	-1.21615	0.241096	-0.581461	-0.98969	-0.0802596	0.735184	0.0646903	0.267244	0.62166	0.500162	0.172396	-0.142094	-1.74322	-1.36298	-1.26667	2.27706	0.83187	-1.25293	-0.418751	0.242086	-0.736011	-0.151483	-0.290396	-1.31052	-1.56113	0.421957	3.00895	0.710053	0.415564	0.938973	0.668286	1.71092	0.56899	-0.632882	0.508302	-0.376609	2.26436	0.160291	0.58072	0.104896	-0.152778	0.198525	0.828652	-0.43246	0.331667
5.66_977.5906m/z	-2.23655	-0.334261	-2.17536	-1.21375	-1.45274	1.14598	-0.860285	-1.02374	0.997428	0.94298	0.799422	-0.497983	0.737153	0.469052	0.345422	0.831975	-1.71351	-0.591749	0.232871	1.68624	-0.0246021	-0.161914	0.355506	-1.41442	-0.13819	0.000654112	-0.627598	-0.207879	-1.03117	1.10036	1.09386	0.310163	1.51184	1.48186	0.327359	0.328565	1.7607	-1.15278	0.596001	0.14825	2.02116	-0.526818	1.94156	0.326084	-0.0894209	0.281539	-0.0126804	-0.146818	0.801573
7.23_913.5800m/z	-3.95179	-0.927677	-1.86215	-2.11136	-1.55193	0.344113	0.0924349	-0.801779	0.919561	-0.251226	0.779084	-0.563327	0.131361	1.53952	0.217422	0.236618	-0.344334	-0.997055	-0.312554	-0.500584	1.06091	-0.0362746	-0.340909	0.49488	0.225066	0.987428	0.281684	-1.48173	-1.20882	0.418483	1.30934	0.806685	1.5915	1.27217	0.690545	1.06926	1.16394	0.715746	0.143834	0.321715	1.07979	1.11298	-0.368175	0.452361	-0.0991785	-0.109243	0.890446	-0.237046	0.74596
3.30_495.4051m/z	1.17248	0.130427	-2.23767	-0.425455	-1.53593	-0.224602	0.290729	-1.38988	-1.15024	-0.864643	0.182196	0.148698	-3.20551	0.26113	-0.212335	1.86627	0.596813	-0.114168	1.14572	0.833763	0.577693	0.17448	-0.791901	-1.17022	0.725781	-0.10071	0.350155	0.556772	0.821744	0.929134	2.07314	1.71897	-0.389135	1.50745	0.613712	0.109764	-0.201199	0.720678	-0.714885	0.224309	0.85149	-1.24596	-0.329005	1.37216	0.570557	-0.9533	0.70033	0.55348	-0.331434
3.31_493.3863m/z	1.24537	0.615369	-0.404417	0.110366	-1.62606	-0.419151	0.724599	-0.422411	-0.956976	-0.757925	-1.37128	0.0729013	-3.0961	-1.43009	-1.13276	0.771779	-0.966671	-0.17355	1.2227	0.607639	0.605098	0.141889	0.532713	-0.0231249	0.883092	-1.43434	0.476258	1.11891	0.972592	0.331461	1.52224	2.29694	1.68264	1.5951	0.918629	0.147926	1.23167	-0.197223	-0.579834	-0.437993	-1.27381	-0.173774	-1.15675	1.28262	0.0638041	-0.483018	0.802568	0.659368	-1.14719
2.80_493.3875m/z	0.291119	0.677802	-0.618352	0.0441797	0.136336	-0.860603	-0.408935	-0.387338	-0.815732	-0.22277	-2.13511	-1.38591	-0.888786	-0.608912	-1.48785	1.99027	-0.338801	-0.787437	0.63414	-1.62589	-0.118214	-0.588038	-0.424943	-0.210116	0.467085	0.127982	0.515017	1.35267	0.928841	1.44939	2.61	2.83505	1.11418	0.250319	1.52382	0.977138	-0.432649	-0.430698	-0.381518	-0.846114	0.11939	-0.805398	-0.713151	0.385741	-0.998684	-0.191802	0.810255	-0.00550512	-0.587682
2.68_467.3742m/z	0.505992	0.710366	0.27512	-0.219555	-0.766866	-0.357545	-0.446223	0.418052	-0.368615	0.0892101	-0.703575	-0.88405	-1.12793	-0.553306	-0.947868	1.64532	-0.815469	-0.160342	0.557211	-1.35785	-1.31443	-0.494326	-0.849629	-1.48063	0.52486	-0.0220786	-0.264916	1.93697	1.88669	1.37364	2.26877	2.2271	1.93359	1.84248	1.6198	1.0661	0.313839	-0.660205	-0.581375	-1.46021	0.192321	-1.0701	-0.530539	-0.558842	0.246252	0.060266	0.54442	0.0726617	-0.536126
2.67_539.4313m/z	0.320956	0.613816	0.635608	-0.477298	-1.171	-0.114295	0.282853	-1.24094	-1.70571	-0.789791	-1.4918	-0.840648	-1.00535	-0.751856	-0.594444	1.31851	0.294842	-0.494972	0.462342	-1.00756	-0.423225	-0.583867	0.796457	-0.500363	0.0438426	-0.182331	0.716345	1.66002	1.6474	1.2393	2.73359	1.91237	1.76098	1.42576	1.40249	0.831175	-0.0853689	-0.502868	-1.45737	-0.994212	-0.652269	-0.672849	-0.402116	0.717782	0.489072	0.379627	0.25441	0.653093	-0.527712
2.77_539.4314m/z	0.391376	0.947781	0.239639	0.0319747	-0.925688	-0.802067	0.419028	-1.13869	-0.910463	-1.01369	-1.58331	-1.37836	-1.14531	-1.63326	-0.715218	1.50811	0.151317	-0.181009	1.0816	-0.915375	-0.54193	-0.294358	0.733255	0.0527363	0.0772779	-0.0629594	0.772235	1.65919	1.40095	1.21323	2.4351	1.82873	1.64783	1.39523	1.40874	0.907479	0.196557	-0.259432	-0.50239	-1.16618	-0.978195	-0.35297	-0.308326	0.945324	-0.00670253	-0.158132	0.50505	0.303013	-0.203566
2.42_465.3589m/z	0.824261	0.0606359	0.371897	-0.548464	0.665274	-1.83384	-1.31012	0.423773	-0.765701	0.158466	-1.06471	-1.18617	-2.42886	-0.971882	-1.04313	0.735076	-0.181612	0.293607	1.65951	0.210516	-0.211394	-0.662833	0.619269	0.0862444	0.25802	0.739481	-0.716069	0.557081	1.15909	0.906357	1.80981	1.77354	1.2551	2.05236	1.2441	-0.514564	0.372033	-0.635684	0.289834	-0.985817	0.662069	-0.50211	-1.37476	0.424135	0.510011	-1.14951	0.687753	0.225309	0.215635
2.35_537.4158m/z	0.720176	0.559298	1.36545	-0.210833	1.12004	-0.28957	-0.426592	-0.963789	-0.989312	-0.402165	-0.637437	-0.851493	-0.640729	-1.66676	-1.30102	1.24942	-0.342605	-0.228937	1.50712	-0.24248	-0.208545	0.0274015	0.9386	0.503957	-0.78287	-0.802203	-0.352727	1.18493	1.54542	0.669384	2.29436	2.7644	1.70059	1.37139	1.07888	0.383192	-0.983905	0.274884	-1.43686	-0.50831	-0.726252	-1.1648	-1.39291	-0.43884	0.122285	0.49099	0.0417414	0.871355	0.251485
2.48_467.3743m/z	1.03354	0.893551	1.41728	-0.250796	0.283845	-0.27936	-0.349377	-0.6121	-0.630581	-0.281096	-0.779483	-0.915188	-1.14591	-1.59519	-0.98391	1.85954	-0.84008	-0.23614	1.12077	-0.94001	-0.421357	-0.611317	0.61076	0.282235	0.304501	-1.38195	-0.082533	0.69979	1.72623	1.18981	2.21171	3.18716	1.15004	1.20208	0.611978	0.603719	-0.0688437	0.287827	-1.57246	-1.14476	0.146043	-0.913983	-0.55776	-0.324747	-0.0769614	0.0861429	0.573842	0.654765	-0.835721
2.71_511.3998m/z	0.545538	0.96257	0.194017	-0.980347	-0.641752	-2.41556	-0.341493	-1.78987	-1.42418	-0.480014	-1.84482	-1.00999	0.114186	0.542519	-0.546394	0.910222	0.327879	0.332734	1.06868	-0.885184	1.34712	-0.795964	-0.227098	-1.12248	1.70792	0.707773	0.847486	0.8957	1.87919	1.36581	1.78283	1.48852	2.11657	1.31352	-0.0691134	0.143237	0.655558	-0.162134	-0.0344401	0.117895	0.259204	-0.0230353	-1.25091	-0.207743	-0.0465327	-0.223881	-0.0157476	-0.920369	-0.183567
3.46_495.4052m/z	0.772282	0.669274	0.0106368	-0.668358	-0.878127	-1.13907	0.469281	-0.877896	-1.00155	-0.509098	0.0936091	0.227639	-0.677471	-1.41501	-0.803039	1.55925	-1.06069	0.677672	0.412926	-0.750225	-0.685937	0.17502	-0.447566	0.127588	0.0773204	-0.630609	1.37586	1.42881	1.9966	1.49788	1.67555	1.57407	1.37278	1.50954	1.49867	0.812102	0.701439	-0.307422	-1.16401	-2.9334	-1.17169	0.057218	0.462364	1.14677	-0.866304	-0.559724	0.0647298	-0.542227	0.0644507
3.24_449.3638m/z	0.393434	-0.110735	-1.62912	-1.41268	0.398645	-0.486516	1.25376	0.265421	0.101391	0.439138	1.23726	0.491788	-0.727085	-1.50421	-2.91507	0.24775	0.695347	-0.0691179	1.013	0.174709	0.972189	1.27386	-0.428304	1.65627	-0.411089	-0.278257	0.217479	0.864779	1.65827	0.872734	0.834699	1.38296	-0.625123	0.456623	1.79397	1.26387	-0.206277	0.560492	-2.77209	-0.793277	-0.828272	0.408691	-1.41289	-0.716003	-0.360969	0.349058	0.426146	-0.000102143	0.303354
8.88_1008.7213m/z	0.573951	-0.176978	-0.735578	-1.303	-1.08447	-0.233251	0.846062	0.17306	-1.02034	-0.25737	0.529406	-1.04104	1.49474	-0.945783	-0.0990657	0.181041	-1.26074	0.256664	-0.417386	1.24237	0.75864	-0.961874	0.112426	0.479357	-0.92166	-0.783745	-2.60322	0.112825	1.44914	2.51859	0.965053	0.555424	-0.476612	0.972079	-0.733709	2.83941	0.300521	-0.534523	-0.0285638	0.0469264	1.22229	0.573421	-0.297268	-0.524834	-0.518355	0.241666	1.05066	0.522835	0.296324
8.00_904.6141m/z	0.177121	-0.260493	-0.0637489	-0.586319	-0.378898	0.842236	-1.03594	-1.39264	-0.380263	0.0174267	-0.130723	0.514226	-1.91119	-0.725334	0.490038	0.626414	0.0271074	0.0472478	-0.0407219	-0.18671	0.412701	0.82091	0.772591	0.895949	0.115964	1.19647	-2.15798	-2.49548	1.35901	-0.233452	0.664985	-1.35131	0.654635	1.9836	0.0686792	1.08321	0.731867	1.26851	1.36611	0.445009	1.14368	0.289514	0.47079	0.623352	1.00311	0.22458	-3.18104	-0.651057	-0.988532
8.07_888.6217m/z	-1.37193	-1.43634	-0.363289	1.1418	-0.549764	-0.880661	-1.31016	0.368692	-1.17758	0.542207	-1.92063	0.0195937	-0.994489	-1.15338	0.0217434	-0.187482	1.00962	-0.421524	0.14448	0.253429	-1.48006	1.63938	-0.00340354	0.474947	0.172344	0.0452846	1.11116	-0.28841	1.9359	0.0962044	0.343364	-1.25328	-0.478918	1.88102	0.681118	1.12219	-0.0429987	0.342824	0.741358	0.81356	2.34338	1.12532	-0.0997376	1.50832	-0.158921	-0.272939	0.947978	0.231003	-0.454065
8.22_881.6732m/z	-0.451669	-0.201888	-0.817938	1.24066	0.0197706	-0.925659	-0.788439	0.781015	-2.74845	0.260098	-0.532835	0.29633	-0.744932	-0.920316	-0.809717	1.76615	-0.637908	-0.118017	0.509075	0.961593	0.426747	-1.22892	-1.12058	-0.145873	0.374798	0.186252	0.443292	-0.567258	1.0333	0.523072	0.611158	-1.68538	0.592761	1.97352	0.721875	0.628869	0.64721	1.50751	2.2905	1.66577	-0.137101	0.823919	-0.0988173	-1.42461	-0.000469178	-0.969342	-0.154343	0.0921916	1.66406
1.01_532.0192m/z	-0.352699	0.387049	0.972512	-1.1147	-0.954503	0.707615	-0.427608	-0.238698	-0.226165	-0.250881	0.809532	-0.408259	-0.359751	-1.30512	-0.576897	-0.531866	0.0465367	-0.999823	-0.888684	0.133523	0.497607	0.708822	-1.45184	0.604391	2.78923	-0.0374885	-1.50382	0.0375231	0.132045	-0.00467656	1.20782	-0.494767	-0.510324	0.37192	0.231895	-0.102265	-1.22028	1.11649	-0.180585	1.49759	0.737442	-0.09991	2.28096	-0.0883118	0.114123	-0.830045	1.68225	0.879848	-0.670608
8.34_944.6743m/z	1.07227	-1.44856	0.756046	-0.573681	-0.295881	-1.14306	-1.59204	-0.267454	-0.951574	-1.5674	-0.142444	1.24326	-0.896886	0.215019	-1.20635	-0.523042	-0.349783	0.275722	0.267423	1.78306	1.3822	0.134724	0.313705	-0.175299	1.79724	-1.11585	-0.997072	-1.55243	-0.581056	-0.539898	0.0537719	0.415274	-0.820679	1.05445	1.48123	1.23594	0.222317	0.40888	-0.602343	-0.164887	1.8118	0.091376	0.290257	-0.468936	-0.277933	0.0836899	2.06627	2.07657	1.06488
8.65_946.6904m/z	-0.426015	-1.13813	0.17053	-0.304486	-0.936344	-1.10064	0.0902356	-1.38855	-1.15951	-2.56035	-1.36577	-0.573684	-0.745469	0.371158	-0.511548	0.0228472	0.834575	1.16953	-0.237985	1.65581	0.791198	1.14342	1.15884	0.534909	2.05726	-0.877292	-0.317483	-1.75466	-0.799116	-0.201958	0.27778	1.37305	-0.478791	1.19466	1.36906	1.53585	-0.476029	0.00788713	-0.307077	0.710789	0.645501	0.632941	0.359869	-0.609779	-0.84596	-0.00459528	1.72734	2.04573	1.11107
9.13_900.7065m/z	-0.270839	-1.79844	-0.0891526	0.0703652	-0.659841	-2.60368	0.702384	-1.22427	-1.19896	-0.181385	-0.142147	1.4534	-0.89581	0.306693	0.119654	-0.370704	1.21758	0.663659	0.0298725	1.18304	-0.141081	1.30653	1.41755	-0.016203	0.321972	-1.06175	-0.24065	-0.925806	-0.0317347	-0.0177037	2.50753	0.809087	-1.2281	1.18837	1.02631	0.951502	-0.723996	0.126535	0.693635	1.1104	0.834997	1.12584	0.379152	-0.00499807	-1.10802	-2.26917	0.435161	0.726375	0.938171
9.16_924.7069m/z	-0.795112	-0.922098	0.695977	-1.06304	-0.851308	-1.04502	-0.32366	-1.19433	0.72542	-0.482905	-1.59016	0.31167	-0.493732	1.20934	-0.645953	-0.230393	0.698945	0.456227	-0.032849	1.7343	1.0289	1.49421	1.65243	0.978761	0.354372	0.294597	-1.23973	-1.59331	0.486704	-0.715654	1.70029	1.50019	-0.801533	0.201488	1.59152	1.4384	0.0799311	0.180297	0.232052	0.790081	0.843931	1.05707	0.415431	-0.430122	-1.29795	-0.470212	0.966568	1.19546	1.03026
0.51_239.5868n	-0.517943	1.44621	0.0636792	0.0734097	0.234864	0.336317	-0.742684	-0.397713	1.8453	1.82322	0.366299	-2.52391	-0.259998	0.555324	-0.17195	1.04619	1.33209	1.86857	1.55687	0.362691	0.557346	-0.178047	0.267736	0.124861	-0.169338	0.351616	1.13272	1.79059	-1.53941	-0.596079	0.0479303	-0.251379	0.38459	0.158457	-0.460994	-0.431073	-0.40048	0.785866	0.240574	-0.250176	-0.864306	-0.794206	-1.72408	0.630296	-0.867105	0.467356	-1.58182	-1.44738	-2.39453
0.89_449.2546m/z	0.347031	0.710313	-0.836713	0.428704	-0.118428	0.933147	-0.728933	0.337307	1.68817	1.17992	0.20086	-0.0499868	-1.37591	0.0554533	0.12371	0.871043	0.75214	1.03708	1.92842	0.678945	1.03089	0.516251	0.599322	-0.964075	-0.667708	0.964865	0.327147	1.98204	-0.972097	-0.39331	-0.202739	-1.13285	0.36228	-0.059849	-0.682539	-0.297368	0.563468	0.465636	-0.388829	0.742097	-1.36251	-0.295955	-0.290275	-1.23548	-3.05322	-1.43944	-0.729859	-1.47123	0.714996
0.59_369.1734m/z	-0.0597472	0.180343	-0.218849	-0.263675	-0.654015	1.10097	-0.397885	0.857426	1.37385	1.26465	-0.0141794	0.0227331	-0.943851	0.522998	0.371853	1.18532	1.74189	0.577727	1.07811	1.00454	0.752791	-0.414251	-0.218946	1.02308	-0.151583	1.28836	0.948964	0.257391	-0.983878	0.119738	-2.14821	-0.777526	-0.384876	0.155269	-0.822267	0.488611	0.816744	1.63298	0.118349	1.04885	-0.828932	0.717516	-1.91762	-1.39025	-2.45202	-1.08955	-0.157004	-2.24752	-1.12289
0.60_437.1606m/z	-0.0913228	0.353311	-0.0572192	-0.082373	-0.394192	1.16356	-0.326121	0.124327	0.895899	0.643338	-0.201593	-0.235049	-0.606222	0.850185	0.260636	1.24466	1.46297	0.602111	0.956218	0.418532	0.471965	-0.235656	0.187311	0.239336	1.07792	1.50763	0.44499	0.167755	-0.150822	-0.108551	-0.856655	-0.553048	-0.211697	0.137939	-0.866646	-0.000324635	0.830686	1.41019	0.594103	1.04618	-0.629131	0.579348	-5.43604	-1.22129	-1.29155	-0.53401	-0.29635	-1.27227	-0.923645
0.58_397.2050m/z	0.193719	1.86417	1.12202	0.471746	0.228099	-0.169148	0.519278	1.45866	0.920072	-0.445239	0.502289	-0.370616	0.0883274	-1.39997	-1.68411	0.697479	1.63898	-0.368625	0.493639	1.0146	-0.407569	0.397692	0.270239	0.508125	0.573591	1.95279	1.29782	1.20723	-0.352328	0.499944	-0.0430861	-0.257947	-0.884051	1.21528	-1.04213	0.0756513	-0.535951	0.158607	0.48349	-0.255496	-0.358858	0.0103702	-1.81267	-3.42825	-1.26697	-2.12133	-0.240525	-1.32582	-0.610286
0.51_239.0853n	-0.0974854	1.3574	0.563019	0.446973	0.46161	0.277487	-0.173989	0.0913094	1.71454	1.38033	0.480784	-0.786021	-0.439106	0.36997	-0.267793	0.904662	1.40727	1.60427	1.20277	0.711978	0.249647	-0.0316812	0.486807	-0.287444	0.169998	1.35471	1.02877	1.51199	-1.43314	-0.538669	-0.191174	-0.457678	-0.140517	0.351226	-1.64826	-0.900648	0.352373	0.802735	0.460415	-0.0875909	-1.35375	-0.557953	-0.243859	-2.6859	-0.390603	-3.26523	-0.984187	-0.930624	-1.88284
0.58_367.1586m/z	0.599367	1.44432	0.254438	0.427692	-0.358807	0.674376	0.062097	0.897056	0.859579	1.07434	0.793997	-0.380201	-0.453239	0.560138	-0.235288	0.877277	1.79965	0.465044	0.344285	0.667979	0.796173	0.502124	-0.0475773	0.097835	-0.45102	1.36167	1.42829	1.29659	-1.63861	-0.000164465	-1.15006	-1.0596	-0.215871	0.790943	-1.44154	-0.829709	0.469132	1.60755	0.926872	0.437025	-1.03982	-0.118945	-0.94392	-1.21318	-1.46345	-2.23706	-0.571795	-1.6519	-1.99502
0.58_435.1457m/z	0.452207	1.31549	-0.118918	0.725791	-0.720984	-0.102576	-0.000740253	0.371138	0.859884	1.11449	0.758076	0.0751925	-0.566132	0.702877	-0.132678	0.751238	1.61087	0.647631	-0.551803	0.754661	0.487223	0.80277	-0.00329199	-0.766469	0.816711	1.61868	1.36466	1.11704	-1.12044	-0.256218	-0.595531	0.119835	-0.0507478	0.624294	-1.89365	-2.80896	0.597272	1.54929	0.948815	0.579677	-0.709603	0.44565	-0.667636	-1.12413	-1.14712	-1.70391	-0.167565	-1.09293	-1.5272
0.56_129.0565m/z	-0.16611	0.916549	-0.848239	0.922928	0.42702	0.947645	-0.77424	0.0250536	1.23907	-1.09753	0.0953632	-0.178924	-0.949865	0.0414492	-0.09602	1.34829	1.72204	0.0129123	0.498796	-1.05194	0.312242	-1.51841	0.185557	0.476662	0.486038	0.810422	0.0311479	0.312012	0.946527	-0.982517	-2.30969	-0.759546	0.129522	0.364395	0.0825613	-2.62141	-0.156404	0.202593	1.24467	0.378946	0.564531	-0.0814206	-4.03244	0.908495	-0.40325	0.52074	-0.113209	0.0633553	0.829733
0.58_470.0191m/z	0.61471	0.963076	0.488775	0.997058	0.155278	-0.128904	-2.12605	-0.113198	0.862564	-0.495949	0.834444	-0.957291	-0.194075	0.381134	0.685849	0.454262	0.476038	-2.22857	0.66517	-0.121414	-0.458782	0.0365907	-0.70722	-1.01564	2.25935	3.11455	0.050836	-0.792178	0.319109	-1.56279	-0.743887	-0.53631	-0.174198	-0.257609	0.147561	-1.62795	0.20704	-0.118537	0.175798	0.41815	0.399227	-0.538114	-3.41522	-0.882718	1.02773	-1.38912	0.482118	0.634859	0.00114511
0.55_212.0030m/z	1.16114	0.538901	0.328748	0.209602	0.312819	0.193917	0.311555	0.319261	1.67001	-1.01082	-0.106906	-1.99566	-0.76128	-0.522088	-0.919203	-1.26975	-0.341859	0.140291	0.963593	0.771489	0.111242	0.511816	0.734021	-0.939168	1.38545	0.965206	1.07127	0.886718	0.474749	-0.432076	-0.774366	-2.324	0.0667371	-0.33399	-0.782622	-2.30153	0.0285343	0.257579	-1.92578	0.786817	1.64476	0.329962	-2.22917	0.795689	1.01515	-0.911825	0.312896	-0.956836	-0.74557
0.55_167.0217m/z	0.166723	1.05233	-0.791665	0.526518	0.0886229	0.697035	0.689518	-0.0142191	2.37773	1.11594	0.57264	0.389673	-0.143715	-0.791186	0.260196	0.430823	1.54992	1.22301	1.42601	-0.104385	1.53918	0.54491	-0.0285766	-0.745872	0.117862	-0.189931	0.182077	1.28764	-0.279832	-1.4644	-2.34999	-1.26959	-0.58221	0.181271	-1.12614	-2.87563	-0.275707	0.405918	-1.34877	-0.735179	-1.322	-1.03804	-1.46675	-0.232536	0.130952	-1.06929	0.129971	-0.94005	0.47859
0.58_256.9908m/z	0.94751	1.59266	-0.44333	-0.393573	-0.409476	-0.258205	-0.134208	0.724339	0.737032	-0.821506	0.763397	0.860824	-0.255335	0.357441	-0.268782	0.788203	1.38918	0.434057	0.21387	0.90342	1.90186	0.909041	-0.243457	-0.376922	0.666502	0.472026	-1.50023	0.975088	-0.141198	-0.104363	-1.26951	-1.34337	-0.144214	0.616361	-1.25581	-3.03471	-1.212	-0.0491669	-0.401314	0.0872805	0.179357	-0.555967	-0.684307	-0.0700267	-0.86277	-2.42722	0.357961	-1.17914	0.586343
0.58_460.9541m/z	-0.0528739	0.472403	-0.88835	0.186888	0.396879	0.942757	0.927923	0.619808	1.86243	0.993407	0.619448	1.24274	-0.701558	-1.03056	0.604858	-1.0688	0.499142	-0.0499007	0.586626	0.230349	1.4295	-0.219576	-0.310005	-0.672773	1.32205	1.70943	0.301408	0.10562	0.489253	-0.0351025	-1.03344	-1.93141	-0.0693917	0.406778	-0.366109	-2.78519	-0.153276	0.360968	-1.38191	-2.37433	-0.392264	0.0499213	-0.859008	0.3826	0.265874	-1.93659	-2.45916	0.674484	-0.100662
0.57_235.0090m/z	-0.255303	0.37826	-0.0311104	-1.13363	0.0979119	0.368445	1.1484	0.191721	1.64654	1.49868	0.72622	0.74861	-0.381749	-0.289191	0.505426	0.437841	1.29257	0.619706	0.765478	-0.362937	1.01969	0.317451	0.00903584	0.208387	2.10786	2.21228	0.341278	1.41493	-0.520187	-0.877515	-1.74482	-2.76486	-0.997574	0.0702172	-0.097227	-1.32815	-0.431049	0.563286	-0.37176	-0.76492	-0.329711	-0.774093	-2.32491	0.237873	-0.632175	-1.14552	-1.41644	-0.597253	-0.357103
0.58_324.9796m/z	-0.345157	0.146616	-0.382863	-0.123907	-0.317885	0.435893	0.484572	0.0888876	1.31878	0.503185	0.533974	-0.0985881	-0.332305	-0.476655	-0.0696392	0.163478	1.50234	0.677112	-0.0377782	-0.514749	0.453622	-0.272759	-0.198723	-0.411913	3.42827	3.37559	0.0782281	1.01526	0.00277407	-0.478292	-2.28276	-0.748523	-0.160973	-0.255888	-0.417862	-1.04502	-1.07192	0.34056	-0.884478	0.0234483	-0.562646	-1.16895	-1.2796	-0.0715962	0.380131	-1.96114	-0.0997195	-0.967614	0.237561
0.55_287.0238m/z	1.62397	-0.229819	1.32814	0.352833	-0.208728	-0.479757	-0.0660983	1.22856	-0.0342634	-0.35347	0.396448	-0.85396	0.357409	0.116777	-0.629112	-0.495062	0.410782	-0.659552	-0.272742	-0.262737	-0.158515	-0.19011	-0.173889	0.170919	1.86466	2.05807	2.04174	0.739708	0.341714	0.117021	-0.243375	1.01911	0.260109	-1.04438	0.0548852	-0.908931	0.16903	-0.392433	-0.248907	0.0147176	-2.99689	0.237121	-0.800532	0.543346	0.199457	-0.473588	-0.173826	-3.11195	-1.2649
0.55_305.0338m/z	1.12387	0.100744	0.357847	1.82751	0.644974	0.201586	-0.618453	-0.50844	0.511881	0.26143	0.760885	-0.934126	-1.61082	-0.730495	0.735464	-0.313433	-0.095621	-0.044755	-1.06794	0.210913	-0.653488	-0.255371	-0.314747	-0.303882	2.18805	2.5958	2.03571	0.0190428	-0.993334	-1.34739	0.202878	0.0161129	0.261076	-0.848937	-0.827665	-1.81344	0.807613	-1.02842	-0.991029	-0.499678	-0.572108	0.777642	-0.472913	-0.498235	0.203005	-0.407351	-0.662104	0.239797	0.699522
0.59_578.9523m/z	1.42648	-0.196615	1.13037	0.560731	0.670161	0.0944069	0.262548	1.51693	0.210487	-3.04222	0.281381	-0.387329	0.282669	0.832203	0.290931	1.33708	1.02916	-1.22329	-0.731199	-0.148585	-0.0411045	0.768538	0.804885	1.23811	0.631652	1.40973	0.429018	0.56394	-0.456275	-1.59173	-3.36136	-0.0277601	-0.0572995	-0.406885	0.607897	0.376428	-1.29722	-0.820309	-1.81227	-0.287497	-0.232171	-0.511355	-0.237354	-0.827886	-0.743692	0.0306522	-1.18946	-0.436469	-0.630773
0.59_605.9940m/z	0.311004	1.00654	0.613527	0.264685	0.955938	0.184002	0.232806	0.926477	1.06957	0.0282755	0.942919	1.12747	0.50445	0.0826954	0.0103448	-1.67349	-0.322613	-0.685812	0.524984	-1.0527	0.466573	0.0958516	-0.198966	0.645363	1.92612	3.20217	-0.903102	0.721221	-0.482773	-0.0543868	-3.35758	-0.918184	0.592153	-0.500735	-0.248491	-0.942734	0.0548192	-1.31294	-0.624355	-0.179085	-1.37069	-1.67476	-1.42301	0.661804	0.725355	0.29697	-0.862262	0.522979	-0.0139986
10.45_316.9482m/z	-0.799252	-0.595171	0.207611	0.340451	0.306775	1.88194	0.995741	-0.170912	1.59154	0.277785	1.66724	-1.04204	0.463593	1.00001	0.846332	-1.44544	0.822464	-0.596848	0.751763	1.2153	1.78057	-1.43743	0.776172	1.08659	0.387948	-0.534358	0.0249781	-0.400466	-0.673111	0.195167	-0.988285	-0.14038	1.45574	-2.21826	-1.66526	-1.75333	-0.0617115	-0.816167	-0.41277	0.304123	0.467343	-1.06828	-0.510449	0.340697	-2.27138	0.489582	0.219058	-0.0424068	-1.40037
10.46_248.9613m/z	-2.07628	-0.272111	1.05312	0.554168	0.865022	1.59666	0.971001	0.279375	0.0266343	0.927102	0.938624	-1.78536	1.75042	0.929592	0.202495	-0.462866	0.811619	-1.92876	1.08752	0.935931	1.35339	-0.00888469	0.482605	1.20635	0.277704	-1.62106	0.072926	0.134496	-1.11053	0.506836	-0.765583	-0.772187	1.30728	-0.712853	0.0474443	-1.72657	-1.64346	-1.28752	-0.818956	-0.666004	-0.44304	-2.08345	-0.302248	-0.112811	0.0427836	0.632708	-0.174607	-0.267381	0.811604
2.78_573.4515m/z	1.23011	1.55552	0.569367	0.443638	2.25453	-1.05585	-1.03645	0.0246106	0.357412	0.151495	0.791804	-0.652808	-0.520637	-0.615651	-0.0879384	0.695144	0.927037	0.00321478	1.81171	-1.54492	1.29222	0.47412	0.289377	0.648176	-0.264437	-0.319073	-1.17492	-0.301878	-1.67591	-0.948865	0.326583	0.593023	-1.16915	-1.34714	-1.59554	-0.808511	-0.353668	1.86736	1.58665	-1.0895	-0.199322	-1.36829	0.885486	-1.43962	-0.216589	-0.291377	-1.40335	0.309228	0.322484
5.49_559.4720m/z	0.810629	0.907653	0.679426	1.07707	2.15309	-0.825458	0.0889654	0.411285	-1.37724	1.62931	1.30503	0.0299361	0.00703326	-1.0082	-0.681444	-0.361141	0.400233	-0.281225	1.54013	1.36366	1.95769	1.71132	-0.906793	0.977134	-0.867129	0.794609	-0.525361	-0.712341	1.01792	-0.687794	-0.637331	-0.0488867	-0.195156	0.258033	0.15854	-0.21977	-0.899046	0.784718	1.58777	-1.1346	-1.06198	-1.42769	-2.80459	-1.38959	-0.951743	-1.235	-0.488478	0.515315	0.496676
5.14_557.4571m/z	0.710489	0.972894	0.82641	0.71629	1.68884	-1.3312	-0.766102	0.0361037	-1.00884	1.13958	1.32632	-0.144831	0.68682	-0.775774	-0.287498	-0.0879055	0.869503	-0.607751	1.19441	1.2257	1.29159	1.27659	-0.112845	0.717593	-0.170356	0.74427	-0.678998	-0.139915	0.48152	-0.118797	-0.370793	0.575366	-0.00805787	-0.083272	-1.31253	-0.158559	-0.519985	1.26502	0.973403	-2.01053	-0.911024	-1.04881	-4.06912	-1.00584	-0.482613	-0.907445	-0.706369	0.405352	0.60301
4.60_557.4570m/z	1.01183	0.995905	0.653897	1.00697	2.03829	-0.425915	0.204349	0.197824	-1.01364	1.68654	1.92776	-0.435381	0.339387	-1.39275	0.0590692	-0.400152	0.510179	-0.65112	0.927994	1.65867	1.1625	1.64789	-0.791288	0.829002	-1.16584	0.857283	-0.454006	-0.709399	0.417789	-0.328344	-0.633025	0.417647	-0.0950993	0.0968278	-1.14951	-0.22442	-0.77462	1.14144	1.39992	-1.89321	-0.809438	-0.820306	-2.66035	-1.22216	-0.549669	-0.690592	-1.1632	-0.4906	0.881598
4.96_557.4572m/z	0.94334	1.19922	0.550681	0.992712	1.78636	-0.551918	-0.175667	0.345334	-1.81494	1.792	2.03933	-0.483727	0.218155	-1.61003	-0.142314	-0.164633	0.734465	-0.353096	0.949958	1.64178	1.11515	1.75865	-0.731031	0.965751	-0.50045	0.929275	-0.498177	-0.65308	0.289956	-0.240901	-0.612773	0.796036	-0.0704126	0.00521348	-0.578935	-0.529741	-0.805193	0.976599	0.835373	-1.34766	-1.46697	-1.07972	-2.67092	-1.42862	-0.54239	-0.509007	-0.676757	-0.141957	0.989773
9.05_895.6988m/z	1.93706	0.836762	0.442209	-0.419218	-0.508451	-0.0232379	0.689434	-0.405733	-1.11317	-1.17086	-0.191542	-0.255199	-0.755499	0.320335	-1.04063	0.391715	-1.45907	2.07959	1.24646	0.841745	0.310276	0.583687	0.567883	-2.1482	1.39153	-0.912762	-3.05137	0.00991151	-1.69095	0.537133	-0.56182	0.517888	-0.110515	0.76899	1.65573	-0.498676	0.841439	-0.178913	0.398376	0.283662	-0.799661	0.244322	-0.545828	-0.525133	1.61263	0.391688	-0.720964	1.20351	1.75478
0.58_270.0363m/z	0.261917	0.109136	1.89499	1.05744	1.57589	-1.21455	0.821634	-0.0519059	-0.956376	-0.676255	0.276025	-0.557879	0.873301	0.398768	-0.355385	-0.748493	0.374949	0.477147	-0.132323	0.493759	0.775172	-0.803112	-0.00340796	0.415487	1.23817	-0.102141	0.214079	2.19843	-2.41697	0.170913	0.423263	0.583217	-0.931164	0.946174	-0.124098	-1.20744	-1.294	-0.33266	-1.846	-0.715869	-0.786831	0.588084	-1.01165	-1.49757	-0.482683	-0.785421	1.41286	0.579754	1.20153
0.78_267.1244m/z	1.35951	0.547095	1.29275	0.976366	1.85016	-0.585417	0.226571	1.34823	0.401667	0.897383	-1.50286	0.295824	-0.858162	0.0941433	-0.435549	0.19941	0.815614	0.0904255	1.39493	-0.655979	-1.1944	0.340639	-0.476899	0.718282	-0.861608	0.217332	-0.174231	1.52422	-1.21163	0.736473	-1.27252	-1.85862	0.274496	0.666001	0.17387	-0.263625	-0.550588	0.485976	0.755563	0.514513	-1.64422	0.441305	-3.6906	-1.44596	0.506672	0.587277	-0.337025	-0.709879	-0.147462
0.55_124.0529n	0.510471	-0.615545	-1.23759	-0.0509098	0.166138	-1.05595	0.682077	2.22907	-0.14211	-0.419167	-0.48314	0.445324	1.33857	-0.235288	0.972172	0.407544	-0.214909	1.142	1.524	-0.351717	-0.268255	-4.04049	-0.262256	-0.841748	1.04667	0.98364	1.37618	0.839062	0.99443	-0.344916	-1.78285	-0.351097	-1.33361	-1.31144	-1.19145	0.0884273	-0.339188	0.114005	0.210709	-0.411134	-1.04749	0.793953	1.17013	-0.128807	-0.829481	0.20779	-0.233709	-0.300195	-0.585667
8.20_1027.5884m/z	0.193051	-0.405779	0.274234	-0.111183	-1.51303	0.219176	0.514875	-0.784134	0.916619	-0.121703	-0.215639	-0.0523553	1.21979	-0.629408	-0.440343	0.98099	1.19477	-0.305557	0.658073	0.931258	1.11177	-0.538626	1.1154	1.18063	0.50908	2.53419	0.0200385	0.291216	1.09598	-0.583786	-2.91951	-0.672053	-1.06715	-1.30754	-2.20427	-1.03727	-0.615752	0.408312	2.12219	-0.518655	-0.425718	-1.04822	-0.230923	-0.754829	-0.673375	-0.68405	-0.735475	0.0334409	-1.16285
13.33_305.0825m/z	1.13885	0.295122	0.989024	1.13066	-0.0404655	0.900024	0.715592	-2.07411	-0.0401936	-0.300162	-0.486453	0.0485392	1.29265	0.220385	1.99389	0.157942	0.0217311	-0.279419	1.85122	-0.765632	-0.0421388	1.34837	0.362788	-0.268284	0.866059	-0.593693	-0.329133	-0.521498	-0.0521811	-0.254296	-2.56426	0.392289	-1.62513	-1.38556	-1.01153	-0.902107	-0.605065	0.658715	-0.446945	-0.0332994	-0.757623	-0.321742	-0.294003	-0.587941	0.00415809	1.09967	-1.63427	-0.899201	0.816231
8.56_957.6084m/z	0.685047	-0.443475	1.01471	0.664533	-0.452609	2.23134	0.367894	0.518643	1.77729	-0.221791	1.25067	0.783386	0.760571	0.292514	1.22736	1.8061	1.88594	0.293155	1.27349	-0.422153	-0.190819	0.0083621	0.736049	-1.40812	-1.59248	0.805313	-0.437855	-0.0800877	0.853207	0.321885	-1.33139	-0.994629	-1.43076	-1.62039	-1.6617	-2.40515	-0.018728	0.154895	0.0699075	0.342054	-1.02529	-2.19196	-1.01279	-0.783952	-0.149263	0.303468	-0.190145	0.549575	-0.488892
7.81_1034.5538m/z	1.80033	0.744363	0.609621	0.536641	0.983188	-0.329747	-0.157875	0.185922	-0.369943	-0.414327	-0.65547	0.758021	-0.305673	0.574714	-0.239214	0.520624	1.13307	-0.221568	1.95306	-0.0943855	-0.478813	-0.605145	-0.0328809	0.0180158	1.12748	0.475598	0.0382096	0.525341	-0.365503	0.0457341	-4.12882	-1.04393	-3.06499	-0.413247	-0.754967	-1.77026	-1.47092	-0.0946676	0.728527	0.439235	-0.632402	-0.845929	1.07382	0.0369735	0.359316	0.082536	1.02432	-0.283241	-0.0180036
6.91_1234.7584m/z	1.93534	1.33895	0.576318	1.81245	0.519364	0.841726	0.596577	0.55393	-1.14794	0.260487	0.0575426	0.591892	-0.467025	-1.15001	-0.383463	1.16698	0.740251	2.08923	0.524159	-0.925304	-0.226124	0.793987	-0.676922	-0.00871599	-0.992592	-1.1495	0.345452	-0.39271	-1.56705	-1.48837	-1.98219	1.00182	-1.86057	-0.283241	-0.577013	-0.436221	0.043187	-0.702659	0.118129	0.231547	-2.21852	-1.44583	0.56986	-0.162048	0.390197	-0.589745	0.996452	-2.33628	0.262883
8.08_234.9235m/z	2.38172	1.35981	1.17403	1.27823	-0.99892	0.765824	1.2947	-0.0073935	-0.531668	-0.386386	0.703184	0.0517291	-0.550748	-0.00692298	-0.224753	0.25705	0.61689	0.762027	0.842251	-0.300698	0.610383	-0.211376	0.309513	-0.496928	0.174841	-0.14201	-2.31037	-0.470011	-0.562483	-0.668798	-2.64068	-0.178599	-0.543643	-1.90963	-0.592395	-1.99963	0.603105	-0.999081	0.257987	-1.4842	-1.3389	-1.78184	-0.932647	0.972582	1.29723	0.781422	0.62283	-0.0341861	0.192367
0.59_307.0035m/z	0.490562	1.40103	0.575192	-0.432909	0.647706	1.21443	-0.520611	0.385762	-0.0494194	-0.665176	-0.594834	-1.37913	0.131401	-0.0323912	0.658592	1.66941	2.22518	-2.25702	-1.42983	-0.0643272	-1.05818	-0.546576	-0.453557	0.462724	0.348609	1.53159	-0.246044	0.195513	-0.344558	-1.22513	-0.414828	-2.19679	-1.08207	-1.55883	1.48609	-0.28058	-0.734468	-0.36213	0.00985237	1.10483	0.268981	-0.297019	-0.988246	1.12413	-1.10153	-1.43163	-0.832275	-0.730594	0.143475
0.59_374.9908m/z	0.797311	0.697358	0.55897	-0.583183	0.458162	0.078356	0.170784	0.372708	0.3055	-0.756013	-0.623619	-0.927482	0.332249	0.767757	0.504763	1.28368	1.81777	-1.73836	0.343996	-0.026776	-0.281519	-0.660671	-0.173373	0.233436	0.036164	0.414062	-0.335711	0.497251	0.143731	-0.191704	-1.30494	-3.13095	-0.849835	-0.0831191	0.601467	0.492907	-1.78521	0.105325	0.685315	1.53269	0.854907	-0.624555	-2.19531	0.0546682	-0.35574	-0.853835	-0.614191	-1.05467	-0.753748
0.59_103.0405m/z	-0.133899	0.810001	1.27989	0.22936	0.698538	1.21142	-0.227696	-0.360632	0.537302	-1.5654	-0.763085	-1.80753	0.0824879	0.391474	-0.507049	0.703759	1.2605	-1.07905	-1.38545	0.734812	0.489638	-0.170485	-1.23217	-0.323044	-0.111155	1.55058	0.346721	0.699286	-1.22959	-0.104375	-0.824581	-1.48454	-1.51334	-0.915846	1.26711	0.745639	-0.862946	-0.747319	-1.0268	1.08014	0.765011	-1.08978	-1.3111	0.404636	-1.16088	-0.492882	1.46503	-1.13997	0.0013115
0.59_442.9778m/z	0.275203	1.37736	1.04866	-0.634656	-0.469233	0.783832	0.791365	0.208038	0.85667	-1.6686	-1.14663	-0.939019	-0.981301	-0.275894	-0.241176	0.994405	1.78514	0.231827	0.0288337	0.231279	-0.098177	-0.169548	1.06516	0.297751	0.516575	1.58203	-0.891295	0.797717	-0.79611	-1.82731	-0.656168	-1.60001	-0.583166	0.441541	1.13054	-0.632879	-2.121	0.259374	-0.97403	1.28665	0.581261	-0.484346	-0.185653	-1.0017	-0.776229	-0.640887	0.0395079	-0.872979	0.0185164
0.57_518.9134m/z	-0.409846	1.15882	0.272629	0.00882838	0.872644	1.71611	0.943405	0.268189	1.42133	1.65961	-0.64748	-0.828193	0.872486	0.253057	0.901523	-2.29267	0.583185	0.481835	-1.2628	0.865295	0.996373	-0.150145	-3.23642	-1.20336	1.08234	1.92454	-0.000289411	-0.0224226	-0.0790714	0.477146	-1.2055	-0.590605	-1.51208	0.390791	1.12373	-0.197446	0.197261	-1.05988	0.355048	-0.8898	-0.721918	-1.36734	-0.740375	0.157677	-0.210035	-1.86731	0.916414	0.18677	0.550768
0.65_417.1555m/z	0.746936	0.76761	-1.61102	0.731525	0.737913	0.794896	0.746038	0.762008	0.838991	0.763439	-1.41892	-0.971114	0.786874	0.804629	-1.14241	-2.25965	0.779931	0.774368	0.777107	0.784649	0.806593	-1.00013	-1.53208	-0.902042	-0.290867	-0.0283685	0.750554	-0.865578	-1.10034	-1.9091	0.773237	-0.899812	0.811128	0.810717	-1.15286	-0.948643	-1.68776	-1.07252	-1.18203	-1.42231	0.793754	-1.47019	0.767666	0.77372	-0.796342	0.767509	0.750034	0.775862	0.761707
0.57_314.9498m/z	-0.234055	1.44418	-1.01599	-0.203381	0.934269	-0.341443	1.16404	0.82714	1.84479	0.363557	-1.33418	0.986661	1.16094	-0.596164	0.58559	-0.0297197	1.15114	-0.0575439	0.843899	0.352641	1.67584	0.323007	-0.426189	0.166742	-2.29524	-1.90237	-0.603267	0.978069	0.361759	-0.606234	-0.620155	-1.6758	-2.38038	0.633205	-0.205118	-0.0559941	0.859193	0.844288	-0.61796	-0.470143	-0.225184	-0.883133	-0.266109	0.749824	-0.0849021	-0.82605	-0.0639809	-0.270369	0.615986
3.21_773.1410m/z	0.625584	0.593994	0.457529	-1.64478	0.454077	0.618862	0.418106	0.413668	0.695851	0.469912	0.687311	0.463572	0.465505	0.611853	-2.02032	0.579236	0.579514	0.608066	0.548392	0.735762	0.700261	0.455217	-1.9362	0.477104	-1.48298	-1.48091	0.455899	0.440079	0.4391	-1.55915	-1.87498	0.671786	-1.72054	0.712571	0.480547	-1.69956	0.665027	0.55157	0.587954	0.588998	0.734305	-2.21921	-1.33124	0.726752	-1.43416	0.514518	-1.12101	0.626658	-2.13346
[truncated: 7 more columns]
